# Supplementary material for: A genome-wide resource for the analysis of protein localisation in Drosophila
Source: eLife. 2016 Feb 20;5:e12068. doi: 10.7554/eLife.12068 (PMC4805545; doi:10.7554/eLife.12068)
Supplement: Supplementary file 1. — Construct and clone names, tag locations, as well the sequencing validation data are listed for all TransgeneOme constructs generated. Sheet 1 lists the sGFP TransgeneOme (TY1-sGFP-V5-BLRP-FLAG tag, NGS sequenced), sheet 2 the TY1-sGFP-FLAG pilot set clones (junctions Sanger sequenced, only exact matches are counted as verified), sheet 3 the TY1-T2A-sGFPnls-FLAG pilot set clones (entire tag Sanger sequenced) and sheet 4 the TY1-sGFP-V5-BLRP-FLAG pilot set clones (entire tag Sanger sequenced). Sheet 5 summarises all verified tagged genes in these sets. DOI: http://dx.doi.org/10.7554/eLife.12068.033 [file elife-12068-supp1.xlsx]

## Sheet: S1-sGFP transgeneOme
Construct_ID	URL	Clone_name	Gene Id	Gene	Gene aliases	gene location	Gene location	Gene Start	Gene End	Strand	clone location	Fosmid ID	Construct Length	Clone Start	Clone End	Tag location (clone coordinates)	Tag location (genomic coordinates)		Grows in selection	[NGS] status (brief)	[NGS]_status (detailed)	[NGS]_coverage	[NGS]_mutations	[NGS]_Rpsl_neo_marker_flipout	[NGS]_Average coverage	[NGS]_reads through the 5' tag/gene junction	[NGS]_reads through the 3' tag/gene junction	[NGS]_reads in the rpsL_neo casstte (indicating unsuccessful flipout) 5' mate pair	[NGS]_reads in the rpsL_neo casstte (indicating unsuccessful flipout) 3' mate pair	[NGS]_base pairs not covered		[NGS]MUTATIONS(POSITION|FROM|TO)	count	status	mut in tag		construct_ID	NGS_name
02182476214419926_A02	https://transgeneome.mpi-cbg.de/transgeneomics/public/clone.html?wellId=59007623	FlyFos015772(CG13014[25154]::S000169_fly_pretag)::2XTY1-SGFP-V5-preTEV-BLRP-3XFLAGdFRT	FBgn0030759	CG13014		dmel-5.43-X(+)::16481892-16482963	dmel-5.43-X	16481892	16482963	+	dmel-5.43-X::16466602-16498360	FlyFos015772	42451	16466602	16498360	FlyFos015772[15525-16587]	dmel-5.43-X(+)[16482837-16482836]		grows	[NGS] validated	fully_covered;no mut;flipped	fully_covered	no mut	flipped	33	170	175	0	0	0							02182476214419926_A02	58519847_7_A_2_15525_16587_dmel-5.43-X_16482837_16482836
02182476214419926_A03	https://transgeneome.mpi-cbg.de/transgeneomics/public/clone.html?wellId=59007687	FlyFos015790(U26[26639]::S000169_fly_pretag)::2XTY1-SGFP-V5-preTEV-BLRP-3XFLAGdFRT	FBgn0027780	U26	U26, CG13401	dmel-5.43-2L(-)::8445861-8449571	dmel-5.43-2L	8445861	8449571	-	dmel-5.43-2L::8423117-8463103	FlyFos015790	50679	8423117	8463103	FlyFos015790[17010-18072]	dmel-5.43-2L(-)[8446095-8446094]		grows	[NGS] validated	fully_covered;no mut;flipped	fully_covered	no mut	flipped	27	88	157	0	0	0							02182476214419926_A03	58519847_7_A_3_17010_18072_dmel-5.43-2L_8446095_8446094
02182476214419926_A04	https://transgeneome.mpi-cbg.de/transgeneomics/public/clone.html?wellId=59007751	FlyFos015796(Ir8a[17221]::S000169_fly_pretag)::2XTY1-SGFP-V5-preTEV-BLRP-3XFLAGdFRT	FBgn0052704	Ir8a	Ionotropic receptor 8a, ionotropic receptor 8a, CG32704, CT7438, CG12122, CG32704, CG12666, IR8a	dmel-5.43-X(-)::9126759-9130618	dmel-5.43-X	9126759	9130618	-	dmel-5.43-X::9119171-9152419	FlyFos015796	43941	9119171	9152419	FlyFos015796[7592-8654]	dmel-5.43-X(-)[9119171-9152419]		grows	[NGS] validated	fully_covered;no mut;flipped	fully_covered	no mut	flipped	16	60	48	0	0	0							02182476214419926_A04	58519847_7_A_4_7592_8654_dmel-5.43-X_9119171_9152419
02182476214419926_A05	https://transgeneome.mpi-cbg.de/transgeneomics/public/clone.html?wellId=59007815	FlyFos015812(Pxt[25407]::S000169_fly_pretag)::2XTY1-SGFP-V5-preTEV-BLRP-3XFLAGdFRT	FBgn0261987	Pxt	Peroxinectin-like, pxd, pxt, anon-WO0172774.128, Dpxt, CG7660, pxd, pxt	dmel-5.43-3R(+)::13545174-13548677	dmel-5.43-3R	13545174	13548677	+	dmel-5.43-3R::13532729-13562316	FlyFos015812	40280	13532729	13562316	FlyFos015812[15778-16840]	dmel-5.43-3R(+)[13532729-13562316]		grows	[NGS] validated	fully_covered;no mut;flipped	fully_covered	no mut	flipped	41	213	267	0	0	0							02182476214419926_A05	58519847_7_A_5_15778_16840_dmel-5.43-3R_13532729_13562316
02182476214419926_A06	https://transgeneome.mpi-cbg.de/transgeneomics/public/clone.html?wellId=59007879	FlyFos015816(CG9628[29544]::S000169_fly_pretag)::2XTY1-SGFP-V5-preTEV-BLRP-3XFLAGdFRT	FBgn0036433	CG9628		dmel-5.43-3L(+)::14615910-14621274	dmel-5.43-3L	14615910	14621274	+	dmel-5.43-3L::14603035-14640804	FlyFos015816	48462	14603035	14640804	FlyFos015816[19915-20977]	dmel-5.43-3L(+)[14620891-14620890]		grows	[NGS] validated	fully_covered;no mut;flipped	fully_covered	no mut	flipped	45	294	345	0	0	0							02182476214419926_A06	58519847_7_A_6_19915_20977_dmel-5.43-3L_14620891_14620890
02182476214419926_A07	https://transgeneome.mpi-cbg.de/transgeneomics/public/clone.html?wellId=59007943	FlyFos015827(l(3)psg2[31516]::S000169_fly_pretag)::2XTY1-SGFP-V5-preTEV-BLRP-3XFLAGdFRT	FBgn0035617	l(3)psg2	lethal (3) persistent salivary gland 2, CG5146, anon-EST:Liang-1.47, clone 1.47	dmel-5.43-3L(+)::5576766-5583490	dmel-5.43-3L	5576766	5583490	+	dmel-5.43-3L::5561128-5600585	FlyFos015827	50150	5561128	5600585	FlyFos015827[21887-22949]	dmel-5.43-3L(+)[5561128-5600585]		grows	[NGS] validated	fully_covered;no mut;flipped	fully_covered	no mut	flipped	4	30	23	0	0	0							02182476214419926_A07	58519847_7_A_7_21887_22949_dmel-5.43-3L_5561128_5600585
02182476214419926_A08	https://transgeneome.mpi-cbg.de/transgeneomics/public/clone.html?wellId=59008007	FlyFos015839(Obp56b[32463]::S000169_fly_pretag)::2XTY1-SGFP-V5-preTEV-BLRP-3XFLAGdFRT	FBgn0046880	Obp56b	Odorant-binding protein 56b, OBP56b, CG30129, 56b, DmelObp56b, CG15129	dmel-5.43-2R(-)::15586347-15586822	dmel-5.43-2R	15586347	15586822	-	dmel-5.43-2R::15574865-15609182	FlyFos015839	45010	15574865	15609182	FlyFos015839[22834-23896]	dmel-5.43-2R(-)[15586350-15586349]		grows	[NGS] validated	fully_covered;no mut;flipped	fully_covered	no mut	flipped	40	180	252	0	0	0							02182476214419926_A08	58519847_7_A_8_22834_23896_dmel-5.43-2R_15586350_15586349
02182476214419926_A09	https://transgeneome.mpi-cbg.de/transgeneomics/public/clone.html?wellId=59008071	FlyFos015846(P58IPK[40799]::S000169_fly_pretag)::2XTY1-SGFP-V5-preTEV-BLRP-3XFLAGdFRT	FBgn0037718	P58IPK	P58IPK, CG8286, inhibitor of protein kinases, CG8286, BEST:SD05682, dIPK, SD05682.5prime	dmel-5.43-3R(+)::5412661-5415303	dmel-5.43-3R	5412661	5415303	+	dmel-5.43-3R::5383833-5426517	FlyFos015846	53377	5383833	5426517	FlyFos015846[31170-32232]	dmel-5.43-3R(+)[5383833-5426517]		grows	[NGS] validated	fully_covered;no mut;flipped	fully_covered	no mut	flipped	25	174	109	0	0	0							02182476214419926_A09	58519847_7_A_9_31170_32232_dmel-5.43-3R_5383833_5426517
02182476214419926_A10	https://transgeneome.mpi-cbg.de/transgeneomics/public/clone.html?wellId=59008135	FlyFos015853(mRpL17[18983]::S000169_fly_pretag)::2XTY1-SGFP-V5-preTEV-BLRP-3XFLAGdFRT	FBgn0035122	mRpL17	mitochondrial ribosomal protein L17, mitochondrial ribosomal protein large subunit 17, L17, mRPL17, BcDNA:RE43278, CG13880	dmel-5.43-3L(+)::264782-265932	dmel-5.43-3L	264782	265932	+	dmel-5.43-3L::238744-274794	FlyFos015853	46743	238744	274794	FlyFos015853[9354-10416]	dmel-5.43-3L(+)[265442-265441]		grows	[NGS] validated	fully_covered;no mut;flipped	fully_covered	no mut	flipped	6	24	53	0	0	0							02182476214419926_A10	58519847_7_A_10_9354_10416_dmel-5.43-3L_265442_265441
02182476214419926_A12	https://transgeneome.mpi-cbg.de/transgeneomics/public/clone.html?wellId=59008263	FlyFos015896(cer[25541]::S000169_fly_pretag)::2XTY1-SGFP-V5-preTEV-BLRP-3XFLAGdFRT	FBgn0034443	cer	crammer, Drosophila CTLA-2like protein, CG10460, D/CTLA-2	dmel-5.43-2R(-)::15283720-15284279	dmel-5.43-2R	15283720	15284279	-	dmel-5.43-2R::15264564-15299780	FlyFos015896	45909	15264564	15299780	FlyFos015896[15912-16974]	dmel-5.43-2R(-)[15283870-15283869]		grows	[NGS] validated	fully_covered;no mut;flipped	fully_covered	no mut	flipped	20	97	149	0	0	0							02182476214419926_A12	58519847_7_A_12_15912_16974_dmel-5.43-2R_15283870_15283869
02182476214419926_B01	https://transgeneome.mpi-cbg.de/transgeneomics/public/clone.html?wellId=59007567	FlyFos015765(membrin[18757]::S000169_fly_pretag)::2XTY1-SGFP-V5-preTEV-BLRP-3XFLAGdFRT	FBgn0260856	membrin	membrin, fmembrin, membrin, CG4780, BcDNA:SD22572, CG4780	dmel-5.43-3L(+)::5359585-5360481	dmel-5.43-3L	5359585	5360481	+	dmel-5.43-3L::5330924-5369542	FlyFos015765	49311	5330924	5369542	FlyFos015765[9128-10190]	dmel-5.43-3L(+)[5360416-5360415]		grows	[NGS] validated	fully_covered;no mut;flipped	fully_covered	no mut	flipped	22	109	103	0	0	0							02182476214419926_B01	58519847_7_B_1_9128_10190_dmel-5.43-3L_5360416_5360415
02182476214419926_B02	https://transgeneome.mpi-cbg.de/transgeneomics/public/clone.html?wellId=59007631	FlyFos015776(Ir75b[18448]::S000169_fly_pretag)::2XTY1-SGFP-V5-preTEV-BLRP-3XFLAGdFRT	FBgn0261402	Ir75b	Ir75b, ionotropic receptor 75b, Ionotropic receptor 75b, CG14586-B, CG14586, IR75b, CG42643	dmel-5.43-3L(-)::17811173-17813293	dmel-5.43-3L	17811173	17813293	-	dmel-5.43-3L::17802358-17841409	FlyFos015776	49744	17802358	17841409	FlyFos015776[8819-9881]	dmel-5.43-3L(-)[17802358-17841409]		grows	[NGS] validated	fully_covered;no mut;flipped	fully_covered	no mut	flipped	22	89	107	0	0	0							02182476214419926_B02	58519847_7_B_2_8819_9881_dmel-5.43-3L_17802358_17841409
02182476214419926_B04	https://transgeneome.mpi-cbg.de/transgeneomics/public/clone.html?wellId=59007759	FlyFos015796(CG17754[40210]::S000169_fly_pretag)::2XTY1-SGFP-V5-preTEV-BLRP-3XFLAGdFRT	FBgn0030114	CG17754	BcDNA:LP02641	dmel-5.43-X(+)::9144460-9149853	dmel-5.43-X	9144460	9149853	+	dmel-5.43-X::9119171-9152419	FlyFos015796	43941	9119171	9152419	FlyFos015796[30581-31643]	dmel-5.43-X(+)[9119171-9152419]		grows	[NGS] validated	fully_covered;no mut;flipped	fully_covered	no mut	flipped	14	69	47	0	0	0							02182476214419926_B04	58519847_7_B_4_30581_31643_dmel-5.43-X_9119171_9152419
02182476214419926_B05	https://transgeneome.mpi-cbg.de/transgeneomics/public/clone.html?wellId=59007823	FlyFos015812(Fsh[35437]::S000169_fly_pretag)::2XTY1-SGFP-V5-preTEV-BLRP-3XFLAGdFRT	FBgn0016650	Fsh	Fsh-Tsh-like receptor, DLGR-1, DLGR1, CG7665, Fsh/CG7665, TSH, FSH, LH/CG receptor, FSH-TSH	dmel-5.43-3R(+)::13551248-13558952	dmel-5.43-3R	13551248	13558952	+	dmel-5.43-3R::13532729-13562316	FlyFos015812	40280	13532729	13562316	FlyFos015812[25808-26870]	dmel-5.43-3R(+)[13532729-13562316]		grows	[NGS] validated	fully_covered;no mut;flipped	fully_covered	no mut	flipped	10	42	45	0	0	0							02182476214419926_B05	58519847_7_B_5_25808_26870_dmel-5.43-3R_13532729_13562316
02182476214419926_B06	https://transgeneome.mpi-cbg.de/transgeneomics/public/clone.html?wellId=59007887	FlyFos015822(Ugt36Bb[35866]::S000169_fly_pretag)::2XTY1-SGFP-V5-preTEV-BLRP-3XFLAGdFRT	FBgn0040261	Ugt36Bb	Ugt36Bb, CG13271, AC 005121B	dmel-5.43-2L(+)::16796595-16798273	dmel-5.43-2L	16796595	16798273	+	dmel-5.43-2L::16772035-16813148	FlyFos015822	51806	16772035	16813148	FlyFos015822[26237-27299]	dmel-5.43-2L(+)[16772035-16813148]		grows	[NGS] validated	fully_covered;no mut;flipped	fully_covered	no mut	flipped	27	148	142	0	0	0							02182476214419926_B06	58519847_7_B_6_26237_27299_dmel-5.43-2L_16772035_16813148
02182476214419926_B07	https://transgeneome.mpi-cbg.de/transgeneomics/public/clone.html?wellId=59007951	FlyFos015827(CG10592[34458]::S000169_fly_pretag)::2XTY1-SGFP-V5-preTEV-BLRP-3XFLAGdFRT	FBgn0035619	CG10592		dmel-5.43-3L(-)::5585841-5588372	dmel-5.43-3L	5585841	5588372	-	dmel-5.43-3L::5561128-5600585	FlyFos015827	50150	5561128	5600585	FlyFos015827[24829-25891]	dmel-5.43-3L(-)[5561128-5600585]		grows	[NGS] validated	fully_covered;no mut;flipped	fully_covered	no mut	flipped	38	190	178	0	0	0							02182476214419926_B07	58519847_7_B_7_24829_25891_dmel-5.43-3L_5561128_5600585
02182476214419926_B08	https://transgeneome.mpi-cbg.de/transgeneomics/public/clone.html?wellId=59008015	FlyFos015839(Obp56c[31132]::S000169_fly_pretag)::2XTY1-SGFP-V5-preTEV-BLRP-3XFLAGdFRT	FBgn0046879	Obp56c	Odorant-binding protein 56c, OBP56c, 56c, CG30128, DmelObp56c, CG15129	dmel-5.43-2R(-)::15587678-15588573	dmel-5.43-2R	15587678	15588573	-	dmel-5.43-2R::15574865-15609182	FlyFos015839	45010	15574865	15609182	FlyFos015839[21503-22565]	dmel-5.43-2R(-)[15587681-15587680]		grows	[NGS] validated	fully_covered;no mut;flipped	fully_covered	no mut	flipped	9	30	78	0	0	0							02182476214419926_B08	58519847_7_B_8_21503_22565_dmel-5.43-2R_15587681_15587680
02182476214419926_B09	https://transgeneome.mpi-cbg.de/transgeneomics/public/clone.html?wellId=59008079	FlyFos015847(CG10969[32670]::S000169_fly_pretag)::2XTY1-SGFP-V5-preTEV-BLRP-3XFLAGdFRT	FBgn0036310	CG10969		dmel-5.43-3L(-)::12771848-12774121	dmel-5.43-3L	12771848	12774121	-	dmel-5.43-3L::12756130-12795070	FlyFos015847	49633	12756130	12795070	FlyFos015847[23041-24103]	dmel-5.43-3L(-)[12772031-12772030]		grows	[NGS] validated	fully_covered;no mut;flipped	fully_covered	no mut	flipped	20	83	96	0	0	0							02182476214419926_B09	58519847_7_B_9_23041_24103_dmel-5.43-3L_12772031_12772030
02182476214419926_B11	https://transgeneome.mpi-cbg.de/transgeneomics/public/clone.html?wellId=59008207	FlyFos015867(CG9632[29461]::S000169_fly_pretag)::2XTY1-SGFP-V5-preTEV-BLRP-3XFLAGdFRT	FBgn0038377	CG9632	BcDNA:AT06908, bs19g07.y1, NEST:bs19g07	dmel-5.43-3R(+)::11685918-11687200	dmel-5.43-3R	11685918	11687200	+	dmel-5.43-3R::11666893-11702676	FlyFos015867	46476	11666893	11702676	FlyFos015867[19832-20894]	dmel-5.43-3R(+)[11666893-11702676]		grows	[NGS] validated	fully_covered;no mut;flipped	fully_covered	no mut	flipped	31	172	148	0	0	0							02182476214419926_B11	58519847_7_B_11_19832_20894_dmel-5.43-3R_11666893_11702676
02182476214419926_C01	https://transgeneome.mpi-cbg.de/transgeneomics/public/clone.html?wellId=59007575	FlyFos015766(CSN8[13664]::S000169_fly_pretag)::2XTY1-SGFP-V5-preTEV-BLRP-3XFLAGdFRT	FBgn0261437	CSN8	COP9 complex homolog subunit 8, CSN8, lethal (2) SH1829, Drosophila COP9 signalosome homolog 8, Cop9 signalosome subunit 8, CH8, csn8, CG42522, l(2)SH1829, Csn8, CG13383, l(2)SH2 1829, CG33297, Dch8	dmel-5.43-2L(+)::8364832-8365663	dmel-5.43-2L	8364832	8365663	+	dmel-5.43-2L::8361603-8394078	FlyFos015766	43168	8361603	8394078	FlyFos015766[4035-5097]	dmel-5.43-2L(+)[8361603-8394078]		grows	[NGS] validated	fully_covered;no mut;flipped	fully_covered	no mut	flipped	27	142	150	0	0	0							02182476214419926_C01	58519847_7_C_1_4035_5097_dmel-5.43-2L_8361603_8394078
02182476214419926_C03	https://transgeneome.mpi-cbg.de/transgeneomics/public/clone.html?wellId=59007703	FlyFos015790(CG31897[27076]::S000169_fly_pretag)::2XTY1-SGFP-V5-preTEV-BLRP-3XFLAGdFRT	FBgn0051897	CG31897	NEST:bs30d08	dmel-5.43-2L(+)::8442447-8445660	dmel-5.43-2L	8442447	8445660	+	dmel-5.43-2L::8423117-8463103	FlyFos015790	50679	8423117	8463103	FlyFos015790[17447-18509]	dmel-5.43-2L(+)[8445658-8445657]		grows	[NGS] validated	fully_covered;no mut;flipped	fully_covered	no mut	flipped	22	92	117	0	0	0							02182476214419926_C03	58519847_7_C_3_17447_18509_dmel-5.43-2L_8445658_8445657
02182476214419926_C05	https://transgeneome.mpi-cbg.de/transgeneomics/public/clone.html?wellId=59007831	FlyFos015813(Ent2[27379]::S000169_fly_pretag)::2XTY1-SGFP-V5-preTEV-BLRP-3XFLAGdFRT	FBgn0263916	Ent2	Equilibrative nucleoside transporter 2, P124, equilibrative nucleoside transporter, equilibrative nucleoside transporter 2, Equilibrative Nucleoside Transporter 2, DmENT2, P124, CG11045, BEST:LD04971, CG31911, ent2, LD04971	dmel-5.43-2L(+)::6562318-6564396	dmel-5.43-2L	6562318	6564396	+	dmel-5.43-2L::6551764-6581819	FlyFos015813	40748	6551764	6581819	FlyFos015813[17750-18812]	dmel-5.43-2L(+)[6564071-6564070]		grows	[NGS] validated	fully_covered;no mut;flipped	fully_covered	no mut	flipped	36	184	162	0	0	0							02182476214419926_C05	58519847_7_C_5_17750_18812_dmel-5.43-2L_6564071_6564070
02182476214419926_C08	https://transgeneome.mpi-cbg.de/transgeneomics/public/clone.html?wellId=59008023	FlyFos015843(CG11418[29869]::S000169_fly_pretag)::2XTY1-SGFP-V5-preTEV-BLRP-3XFLAGdFRT	FBgn0024360	CG11418	EG:8D8.8, DmNP_569904	dmel-5.43-X(-)::1238905-1243390	dmel-5.43-X	1238905	1243390	-	dmel-5.43-X::1224896-1259515	FlyFos015843	45312	1224896	1259515	FlyFos015843[20240-21302]	dmel-5.43-X(-)[1239277-1239276]		grows	[NGS] validated	fully_covered;no mut;flipped	fully_covered	no mut	flipped	27	105	164	0	0	0							02182476214419926_C08	58519847_7_C_8_20240_21302_dmel-5.43-X_1239277_1239276
02182476214419926_C09	https://transgeneome.mpi-cbg.de/transgeneomics/public/clone.html?wellId=59008087	FlyFos015847(CG42709[15991]::S000169_fly_pretag)::2XTY1-SGFP-V5-preTEV-BLRP-3XFLAGdFRT	FBgn0261674	CG42709	EP3622, EP(3)3622, CG17667	dmel-5.43-3L(+)::12783293-12789184	dmel-5.43-3L	12783293	12789184	+	dmel-5.43-3L::12756130-12795070	FlyFos015847	49633	12756130	12795070	FlyFos015847[6362-7424]	dmel-5.43-3L(+)[12788710-12788709]		grows	[NGS] validated	fully_covered;no mut;flipped	fully_covered	no mut	flipped	22	114	83	0	0	0							02182476214419926_C09	58519847_7_C_9_6362_7424_dmel-5.43-3L_12788710_12788709
02182476214419926_C11	https://transgeneome.mpi-cbg.de/transgeneomics/public/clone.html?wellId=59008215	FlyFos015873(Sr-CII[42923]::S000169_fly_pretag)::2XTY1-SGFP-V5-preTEV-BLRP-3XFLAGdFRT	FBgn0020377	Sr-CII	Scavenger receptor class C, type II, Scavenger Receptor, CG8856, SR-CII, dSR-CII, CT25430	dmel-5.43-2R(-)::8096359-8098730	dmel-5.43-2R	8096359	8098730	-	dmel-5.43-2R::8089401-8129836	FlyFos015873	51128	8089401	8129836	FlyFos015873[33294-34356]	dmel-5.43-2R(-)[8096544-8096543]		grows	[NGS] validated	fully_covered;no mut;flipped	fully_covered	no mut	flipped	35	249	196	0	0	0							02182476214419926_C11	58519847_7_C_11_33294_34356_dmel-5.43-2R_8096544_8096543
02182476214419926_D01	https://transgeneome.mpi-cbg.de/transgeneomics/public/clone.html?wellId=59007583	FlyFos015766(CG17292[22153]::S000169_fly_pretag)::2XTY1-SGFP-V5-preTEV-BLRP-3XFLAGdFRT	FBgn0032029	CG17292		dmel-5.43-2L(+)::8370513-8374250	dmel-5.43-2L	8370513	8374250	+	dmel-5.43-2L::8361603-8394078	FlyFos015766	43168	8361603	8394078	FlyFos015766[12524-13586]	dmel-5.43-2L(+)[8361603-8394078]		grows	[NGS] validated	fully_covered;no mut;flipped	fully_covered	no mut	flipped	31	187	129	0	0	0							02182476214419926_D01	58519847_7_D_1_12524_13586_dmel-5.43-2L_8361603_8394078
02182476214419926_D02	https://transgeneome.mpi-cbg.de/transgeneomics/public/clone.html?wellId=59007647	FlyFos015776(CG32188[33652]::S000169_fly_pretag)::2XTY1-SGFP-V5-preTEV-BLRP-3XFLAGdFRT	FBgn0052188	CG32188		dmel-5.43-3L(-)::17826377-17826694	dmel-5.43-3L	17826377	17826694	-	dmel-5.43-3L::17802358-17841409	FlyFos015776	49744	17802358	17841409	FlyFos015776[24023-25085]	dmel-5.43-3L(-)[17802358-17841409]		grows	[NGS] validated	fully_covered;no mut;flipped	fully_covered	no mut	flipped	30	93	167	0	0	0							02182476214419926_D02	58519847_7_D_2_24023_25085_dmel-5.43-3L_17802358_17841409
02182476214419926_D05	https://transgeneome.mpi-cbg.de/transgeneomics/public/clone.html?wellId=59007839	FlyFos015813(CG11043[31401]::S000169_fly_pretag)::2XTY1-SGFP-V5-preTEV-BLRP-3XFLAGdFRT	FBgn0031831	CG11043	Cytochrome c oxidase Polypeptide VB, Vb	dmel-5.43-2L(+)::6559431-6560133	dmel-5.43-2L	6559431	6560133	+	dmel-5.43-2L::6551764-6581819	FlyFos015813	40748	6551764	6581819	FlyFos015813[21772-22834]	dmel-5.43-2L(+)[6560049-6560048]		grows	[NGS] validated	fully_covered;no mut;flipped	fully_covered	no mut	flipped	7	35	52	0	0	0							02182476214419926_D05	58519847_7_D_5_21772_22834_dmel-5.43-2L_6560049_6560048
02182476214419926_D06	https://transgeneome.mpi-cbg.de/transgeneomics/public/clone.html?wellId=59007903	FlyFos015822(CG17928[30916]::S000169_fly_pretag)::2XTY1-SGFP-V5-preTEV-BLRP-3XFLAGdFRT	FBgn0032603	CG17928	anon-WO0118547.16	dmel-5.43-2L(+)::16791053-16793444	dmel-5.43-2L	16791053	16793444	+	dmel-5.43-2L::16772035-16813148	FlyFos015822	51806	16772035	16813148	FlyFos015822[21287-22349]	dmel-5.43-2L(+)[16772035-16813148]		grows	[NGS] validated	fully_covered;no mut;flipped	fully_covered	no mut	flipped	24	109	138	0	0	0							02182476214419926_D06	58519847_7_D_6_21287_22349_dmel-5.43-2L_16772035_16813148
02182476214419926_D07	https://transgeneome.mpi-cbg.de/transgeneomics/public/clone.html?wellId=59007967	FlyFos015830(CG1924[28419]::S000169_fly_pretag)::2XTY1-SGFP-V5-preTEV-BLRP-3XFLAGdFRT	FBgn0030377	CG1924		dmel-5.43-X(-)::12070473-12072659	dmel-5.43-X	12070473	12072659	-	dmel-5.43-X::12057090-12089719	FlyFos015830	43322	12057090	12089719	FlyFos015830[18790-19852]	dmel-5.43-X(-)[12070931-12070930]		grows	[NGS] validated	fully_covered;no mut;flipped	fully_covered	no mut	flipped	28	187	154	0	0	0							02182476214419926_D07	58519847_7_D_7_18790_19852_dmel-5.43-X_12070931_12070930
02182476214419926_D10	https://transgeneome.mpi-cbg.de/transgeneomics/public/clone.html?wellId=59008159	FlyFos015853(miple[15308]::S000169_fly_pretag)::2XTY1-SGFP-V5-preTEV-BLRP-3XFLAGdFRT	FBgn0027111	miple	miple, anon-EST:Posey203, CG1221, Miple, miple1	dmel-5.43-3L(+)::267299-270336	dmel-5.43-3L	267299	270336	+	dmel-5.43-3L::238744-274794	FlyFos015853	46743	238744	274794	FlyFos015853[5679-6741]	dmel-5.43-3L(+)[269117-269116]		grows	[NGS] validated	fully_covered;no mut;flipped	fully_covered	no mut	flipped	26	114	110	0	0	0							02182476214419926_D10	58519847_7_D_10_5679_6741_dmel-5.43-3L_269117_269116
02182476214419926_D11	https://transgeneome.mpi-cbg.de/transgeneomics/public/clone.html?wellId=59008223	FlyFos015877(scpr-B[26476]::S000169_fly_pretag)::2XTY1-SGFP-V5-preTEV-BLRP-3XFLAGdFRT	FBgn0037888	scpr-B	SCP-containing protein B, SCP-Related-B, scp-B, cg17210, anon-WO0140519.115, SCPR-B, CG17210	dmel-5.43-3R(-)::7065763-7066713	dmel-5.43-3R	7065763	7066713	-	dmel-5.43-3R::7049017-7088366	FlyFos015877	50042	7049017	7088366	FlyFos015877[16847-17909]	dmel-5.43-3R(-)[7049017-7088366]		grows	[NGS] validated	fully_covered;no mut;flipped	fully_covered	no mut	flipped	20	77	99	0	0	0							02182476214419926_D11	58519847_7_D_11_16847_17909_dmel-5.43-3R_7049017_7088366
02182476214419926_D12	https://transgeneome.mpi-cbg.de/transgeneomics/public/clone.html?wellId=59008287	FlyFos015907(Rab-RP3[20549]::S000169_fly_pretag)::2XTY1-SGFP-V5-preTEV-BLRP-3XFLAGdFRT	FBgn0015793	Rab-RP3	Rab-related protein 3, rab-related protein 3, Rab19/RP3, CG7062, DRabRP3, Rab19, DmRab19, DRABR3, AAF50452, Rab-r3	dmel-5.43-3L(+)::8290272-8291605	dmel-5.43-3L	8290272	8291605	+	dmel-5.43-3L::8265901-8302240	FlyFos015907	47032	8265901	8302240	FlyFos015907[10920-11982]	dmel-5.43-3L(+)[8291322-8291321]		grows	[NGS] validated	fully_covered;no mut;flipped	fully_covered	no mut	flipped	14	50	75	0	0	0							02182476214419926_D12	58519847_7_D_12_10920_11982_dmel-5.43-3L_8291322_8291321
02182476214419926_E07	https://transgeneome.mpi-cbg.de/transgeneomics/public/clone.html?wellId=59007975	FlyFos015835(mei-9[28876]::S000169_fly_pretag)::2XTY1-SGFP-V5-preTEV-BLRP-3XFLAGdFRT	FBgn0002707	mei-9	meiotic 9, meiotic-9, MEI-9, Rad1p, DhR1, DmXPF, mus(1)110, CG3697, mei9, xpf/mei-9, mus110	dmel-5.43-X(-)::4208263-4212834	dmel-5.43-X	4208263	4212834	-	dmel-5.43-X::4189642-4224652	FlyFos015835	45703	4189642	4224652	FlyFos015835[19247-20309]	dmel-5.43-X(-)[4189642-4224652]		grows	[NGS] validated	fully_covered;no mut;flipped	fully_covered	no mut	flipped	35	171	207	0	0	0							02182476214419926_E07	58519847_7_E_7_19247_20309_dmel-5.43-X_4189642_4224652
02182476214419926_E12	https://transgeneome.mpi-cbg.de/transgeneomics/public/clone.html?wellId=59008295	FlyFos015911(Tm2[28481]::S000169_fly_pretag)::2XTY1-SGFP-V5-preTEV-BLRP-3XFLAGdFRT	FBgn0004117	Tm2	Tropomyosin 2, tropomyosin2, lethal(3)nc99Eb, Tropomyosin-2, Tropomyosin, tropomyosin I, Tropomyosin I, tropomyosin 127, tropomyosin, Ifm(3)5, Tm1, Tn-H, l(3)nc99Eb, DROTROPI1, Ifm(3)3, Ifm-TmI, Tm127, dro Tm, TM2, TmI, TmII, CG4843, Tm, mTmI	dmel-5.43-3R(+)::11135915-11140920	dmel-5.43-3R	11135915	11140920	+	dmel-5.43-3R::11121479-11152173	FlyFos015911	41387	11121479	11152173	FlyFos015911[18852-19914]	dmel-5.43-3R(+)[11121479-11152173]		grows	[NGS] validated	fully_covered;no mut;flipped	fully_covered	no mut	flipped	16	63	59	0	0	0							02182476214419926_E12	58519847_7_E_12_18852_19914_dmel-5.43-3R_11121479_11152173
02182476214419926_F02	https://transgeneome.mpi-cbg.de/transgeneomics/public/clone.html?wellId=59007663	FlyFos015776(CG32189[35199]::S000169_fly_pretag)::2XTY1-SGFP-V5-preTEV-BLRP-3XFLAGdFRT	FBgn0052189	CG32189	BcDNA:RE39957	dmel-5.43-3L(-)::17827844-17828274	dmel-5.43-3L	17827844	17828274	-	dmel-5.43-3L::17802358-17841409	FlyFos015776	49744	17802358	17841409	FlyFos015776[25570-26632]	dmel-5.43-3L(-)[17802358-17841409]		grows	[NGS] validated	fully_covered;no mut;flipped	fully_covered	no mut	flipped	24	91	102	0	0	0							02182476214419926_F02	58519847_7_F_2_25570_26632_dmel-5.43-3L_17802358_17841409
02182476214419926_F03	https://transgeneome.mpi-cbg.de/transgeneomics/public/clone.html?wellId=59007727	FlyFos015794(CG3689[21035]::S000169_fly_pretag)::2XTY1-SGFP-V5-preTEV-BLRP-3XFLAGdFRT	FBgn0035987	CG3689		dmel-5.43-3L(+)::9404159-9406735	dmel-5.43-3L	9404159	9406735	+	dmel-5.43-3L::9381483-9417914	FlyFos015794	47124	9381483	9417914	FlyFos015794[11406-12468]	dmel-5.43-3L(+)[9406510-9406509]		grows	[NGS] validated	fully_covered;no mut;flipped	fully_covered	no mut	flipped	30	152	156	0	0	0							02182476214419926_F03	58519847_7_F_3_11406_12468_dmel-5.43-3L_9406510_9406509
02182476214419926_F04	https://transgeneome.mpi-cbg.de/transgeneomics/public/clone.html?wellId=59007791	FlyFos015802(RnrS[17931]::S000169_fly_pretag)::2XTY1-SGFP-V5-preTEV-BLRP-3XFLAGdFRT	FBgn0011704	RnrS	Ribonucleoside diphosphate reductase small subunit, Ribonucleotide reductase, ribonucleoside-diphosphate reductase small subunit, Ribonucleotide reductase small subunit, DmRNR2, RNR2, rnr2, Rnr2, anon-WO0118547.148, RNrS, Rnrs, dRNR2, CG8975	dmel-5.43-2R(-)::7870650-7872948	dmel-5.43-2R	7870650	7872948	-	dmel-5.43-2R::7862636-7900783	FlyFos015802	48840	7862636	7900783	FlyFos015802[8302-9364]	dmel-5.43-2R(-)[7862636-7900783]		grows	[NGS] validated	fully_covered;no mut;flipped	fully_covered	no mut	flipped	22	91	86	0	0	0							02182476214419926_F04	58519847_7_F_4_8302_9364_dmel-5.43-2R_7862636_7900783
02182476214419926_F06	https://transgeneome.mpi-cbg.de/transgeneomics/public/clone.html?wellId=59007919	FlyFos015826(CG6304[20959]::S000169_fly_pretag)::2XTY1-SGFP-V5-preTEV-BLRP-3XFLAGdFRT	FBgn0032624	CG6304	anon-WO0140519.248	dmel-5.43-2L(-)::17011547-17013054	dmel-5.43-2L	17011547	17013054	-	dmel-5.43-2L::17000280-17039625	FlyFos015826	50038	17000280	17039625	FlyFos015826[11330-12392]	dmel-5.43-2L(-)[17000280-17039625]		grows	[NGS] validated	fully_covered;no mut;flipped	fully_covered	no mut	flipped	30	163	203	0	0	0							02182476214419926_F06	58519847_7_F_6_11330_12392_dmel-5.43-2L_17000280_17039625
02182476214419926_F07	https://transgeneome.mpi-cbg.de/transgeneomics/public/clone.html?wellId=59007983	FlyFos015835(CG2982[35608]::S000169_fly_pretag)::2XTY1-SGFP-V5-preTEV-BLRP-3XFLAGdFRT	FBgn0029704	CG2982		dmel-5.43-X(+)::4213473-4215778	dmel-5.43-X	4213473	4215778	+	dmel-5.43-X::4189642-4224652	FlyFos015835	45703	4189642	4224652	FlyFos015835[25979-27041]	dmel-5.43-X(+)[4189642-4224652]		grows	[NGS] validated	fully_covered;no mut;flipped	fully_covered	no mut	flipped	30	143	178	0	0	0							02182476214419926_F07	58519847_7_F_7_25979_27041_dmel-5.43-X_4189642_4224652
02182476214419926_F08	https://transgeneome.mpi-cbg.de/transgeneomics/public/clone.html?wellId=59008047	FlyFos015846(CG9396[22005]::S000169_fly_pretag)::2XTY1-SGFP-V5-preTEV-BLRP-3XFLAGdFRT	FBgn0037714	CG9396		dmel-5.43-3R(-)::5396133-5397345	dmel-5.43-3R	5396133	5397345	-	dmel-5.43-3R::5383833-5426517	FlyFos015846	53377	5383833	5426517	FlyFos015846[12376-13438]	dmel-5.43-3R(-)[5383833-5426517]		grows	[NGS] validated	fully_covered;no mut;flipped	fully_covered	no mut	flipped	24	104	116	0	0	0							02182476214419926_F08	58519847_7_F_8_12376_13438_dmel-5.43-3R_5383833_5426517
02182476214419926_F09	https://transgeneome.mpi-cbg.de/transgeneomics/public/clone.html?wellId=59008111	FlyFos015851(ana3[20742]::S000169_fly_pretag)::2XTY1-SGFP-V5-preTEV-BLRP-3XFLAGdFRT	FBgn0033718	ana3	anastral spindle 3, CG13162, anastral spindle phenotype 3, CG13162, Ana3	dmel-5.43-2R(+)::8232591-8238583	dmel-5.43-2R	8232591	8238583	+	dmel-5.43-2R::8210355-8249692	FlyFos015851	50030	8210355	8249692	FlyFos015851[11113-12175]	dmel-5.43-2R(+)[8238581-8238580]		grows	[NGS] validated	fully_covered;no mut;flipped	fully_covered	no mut	flipped	5	16	60	0	0	0							02182476214419926_F09	58519847_7_F_9_11113_12175_dmel-5.43-2R_8238581_8238580
02182476214419926_F11	https://transgeneome.mpi-cbg.de/transgeneomics/public/clone.html?wellId=59008239	FlyFos015887(CG3770[28265]::S000169_fly_pretag)::2XTY1-SGFP-V5-preTEV-BLRP-3XFLAGdFRT	FBgn0035085	CG3770	CT12588	dmel-5.43-2R(+)::20832666-20834159	dmel-5.43-2R	20832666	20834159	+	dmel-5.43-2R::20815411-20841293	FlyFos015887	36575	20815411	20841293	FlyFos015887[18636-19698]	dmel-5.43-2R(+)[20815411-20841293]		grows	[NGS] validated	fully_covered;no mut;flipped	fully_covered	no mut	flipped	42	243	194	0	0	0							02182476214419926_F11	58519847_7_F_11_18636_19698_dmel-5.43-2R_20815411_20841293
02182476214419926_G02	https://transgeneome.mpi-cbg.de/transgeneomics/public/clone.html?wellId=59007671	FlyFos015781(verm[21395]::S000169_fly_pretag)::2XTY1-SGFP-V5-preTEV-BLRP-3XFLAGdFRT	FBgn0261341	verm	vermiform, LDLa domain containing chitin binding protein 1, helmsman, Vermiform, CG8756, N63, DmCDA2, Verm, hlm, l(3)76BDx, LCBP1	dmel-5.43-3L(-)::19683133-19688356	dmel-5.43-3L	19683133	19688356	-	dmel-5.43-3L::19653992-19695373	FlyFos015781	52074	19653992	19695373	FlyFos015781[11766-12828]	dmel-5.43-3L(-)[19683609-19683608]		grows	[NGS] validated	fully_covered;no mut;flipped	fully_covered	no mut	flipped	18	67	82	0	0	0							02182476214419926_G02	58519847_7_G_2_11766_12828_dmel-5.43-3L_19683609_19683608
02182476214419926_G04	https://transgeneome.mpi-cbg.de/transgeneomics/public/clone.html?wellId=59007799	FlyFos015808(Hmgcr[17373]::S000169_fly_pretag)::2XTY1-SGFP-V5-preTEV-BLRP-3XFLAGdFRT	FBgn0263782	Hmgcr	HMG Coenzyme A reductase, columbus, HMG-CoA reductase, HMGCoA reductase, lethal (3) 04684, 3-hydroxy-3-methylglutaryl coenzyme A reductase, 3-Hydroxy-3-Methylglutaryl CoA Reductase, Hmg-CoA-reductase, HMGCo-A reductase, DmHMG-CoAr, HmG-CoAR, HMGCR, hmgcr, HMGCoAR, HMGCR_Dm, CG10367, bs32f05.y1, clb, Clb, BcDNA:LD15354, HMGCoARr, l(3)01152, l(3)04684, HMGCoAr, hmgc, Hmg, hmgrc, bro1	dmel-5.43-3R(+)::19559046-19576868	dmel-5.43-3R	19559046	19576868	+	dmel-5.43-3R::19544021-19583961	FlyFos015808	50633	19544021	19583961	FlyFos015808[7744-8806]	dmel-5.43-3R(+)[19576219-19576218]		grows	[NGS] validated	fully_covered;no mut;flipped	fully_covered	no mut	flipped	29	130	115	0	0	0							02182476214419926_G04	58519847_7_G_4_7744_8806_dmel-5.43-3R_19576219_19576218
02182476214419926_G05	https://transgeneome.mpi-cbg.de/transgeneomics/public/clone.html?wellId=59007863	FlyFos015815(CG31337[23884]::S000169_fly_pretag)::2XTY1-SGFP-V5-preTEV-BLRP-3XFLAGdFRT	FBgn0051337	CG31337	BcDNA:RE40816	dmel-5.43-3R(-)::9369688-9371106	dmel-5.43-3R	9369688	9371106	-	dmel-5.43-3R::9355786-9389371	FlyFos015815	44278	9355786	9389371	FlyFos015815[14255-15317]	dmel-5.43-3R(-)[9355786-9389371]		grows	[NGS] validated	fully_covered;no mut;flipped	fully_covered	no mut	flipped	9	40	55	0	0	0							02182476214419926_G05	58519847_7_G_5_14255_15317_dmel-5.43-3R_9355786_9389371
02182476214419926_G06	https://transgeneome.mpi-cbg.de/transgeneomics/public/clone.html?wellId=59007927	FlyFos015827(spo[32192]::S000169_fly_pretag)::2XTY1-SGFP-V5-preTEV-BLRP-3XFLAGdFRT	FBgn0003486	spo	spook, CYP307A1, Spo, spook, 307a1, CG10594, CYP307A1-Dm, Cyp307a1, Dmspo	dmel-5.43-3L(-)::5583183-5585677	dmel-5.43-3L	5583183	5585677	-	dmel-5.43-3L::5561128-5600585	FlyFos015827	50150	5561128	5600585	FlyFos015827[22563-23625]	dmel-5.43-3L(-)[5561128-5600585]		grows	[NGS] validated	fully_covered;no mut;flipped	fully_covered	no mut	flipped	33	152	210	0	0	0							02182476214419926_G06	58519847_7_G_6_22563_23625_dmel-5.43-3L_5561128_5600585
02182476214419926_G07	https://transgeneome.mpi-cbg.de/transgeneomics/public/clone.html?wellId=59007991	FlyFos015835(CG15579[25443]::S000169_fly_pretag)::2XTY1-SGFP-V5-preTEV-BLRP-3XFLAGdFRT	FBgn0040906	CG15579		dmel-5.43-X(-)::4205397-4205832	dmel-5.43-X	4205397	4205832	-	dmel-5.43-X::4189642-4224652	FlyFos015835	45703	4189642	4224652	FlyFos015835[15814-16876]	dmel-5.43-X(-)[4189642-4224652]		grows	[NGS] validated	fully_covered;no mut;flipped	fully_covered	no mut	flipped	16	58	110	0	0	0							02182476214419926_G07	58519847_7_G_7_15814_16876_dmel-5.43-X_4189642_4224652
02182476214419926_G08	https://transgeneome.mpi-cbg.de/transgeneomics/public/clone.html?wellId=59008055	FlyFos015846(CG16790[20773]::S000169_fly_pretag)::2XTY1-SGFP-V5-preTEV-BLRP-3XFLAGdFRT	FBgn0037713	CG16790		dmel-5.43-3R(-)::5394796-5395936	dmel-5.43-3R	5394796	5395936	-	dmel-5.43-3R::5383833-5426517	FlyFos015846	53377	5383833	5426517	FlyFos015846[11144-12206]	dmel-5.43-3R(-)[5383833-5426517]		grows	[NGS] validated	fully_covered;no mut;flipped	fully_covered	no mut	flipped	8	45	37	0	0	0							02182476214419926_G08	58519847_7_G_8_11144_12206_dmel-5.43-3R_5383833_5426517
02182476214419926_G09	https://transgeneome.mpi-cbg.de/transgeneomics/public/clone.html?wellId=59008119	FlyFos015851(CG30049[12848]::S000169_fly_pretag)::2XTY1-SGFP-V5-preTEV-BLRP-3XFLAGdFRT	FBgn0050049	CG30049	CG30049-PA	dmel-5.43-2R(+)::8243176-8246592	dmel-5.43-2R	8243176	8246592	+	dmel-5.43-2R::8210355-8249692	FlyFos015851	50030	8210355	8249692	FlyFos015851[3219-4281]	dmel-5.43-2R(+)[8246475-8246474]		grows	[NGS] validated	fully_covered;no mut;flipped	fully_covered	no mut	flipped	29	156	126	0	0	0							02182476214419926_G09	58519847_7_G_9_3219_4281_dmel-5.43-2R_8246475_8246474
02182476214419926_G10	https://transgeneome.mpi-cbg.de/transgeneomics/public/clone.html?wellId=59008183	FlyFos015857(TM4SF[16088]::S000169_fly_pretag)::2XTY1-SGFP-V5-preTEV-BLRP-3XFLAGdFRT	FBgn0020372	TM4SF	Transmembrane 4 superfamily, CG11303, Dm.Tsp60A	dmel-5.43-2R(+)::19765982-19768383	dmel-5.43-2R	19765982	19768383	+	dmel-5.43-2R::19729951-19774627	FlyFos015857	55369	19729951	19774627	FlyFos015857[6459-7521]	dmel-5.43-2R(+)[19768170-19768169]		grows	[NGS] validated	fully_covered;no mut;flipped	fully_covered	no mut	flipped	21	109	112	0	0	0							02182476214419926_G10	58519847_7_G_10_6459_7521_dmel-5.43-2R_19768170_19768169
02182476214419926_G11	https://transgeneome.mpi-cbg.de/transgeneomics/public/clone.html?wellId=59008247	FlyFos015887(CG3760[21268]::S000169_fly_pretag)::2XTY1-SGFP-V5-preTEV-BLRP-3XFLAGdFRT	FBgn0022343	CG3760	anon-fast-evolving-2C9, anon-fe2C9, anon-EST:fe2C9, anon2C9	dmel-5.43-2R(+)::20825784-20827292	dmel-5.43-2R	20825784	20827292	+	dmel-5.43-2R::20815411-20841293	FlyFos015887	36575	20815411	20841293	FlyFos015887[11639-12701]	dmel-5.43-2R(+)[20815411-20841293]		grows	[NGS] validated	fully_covered;no mut;flipped	fully_covered	no mut	flipped	42	308	217	0	0	0							02182476214419926_G11	58519847_7_G_11_11639_12701_dmel-5.43-2R_20815411_20841293
02182476214419926_G12	https://transgeneome.mpi-cbg.de/transgeneomics/public/clone.html?wellId=59008311	FlyFos015915(Cyp6t3[36608]::S000169_fly_pretag)::2XTY1-SGFP-V5-preTEV-BLRP-3XFLAGdFRT	FBgn0033697	Cyp6t3	Cyp6t3, CG8457, 6t3	dmel-5.43-2R(+)::8078187-8079941	dmel-5.43-2R	8078187	8079941	+	dmel-5.43-2R::8072484-8106733	FlyFos015915	44942	8072484	8106733	FlyFos015915[26979-28041]	dmel-5.43-2R(+)[8079756-8079755]		grows	[NGS] validated	fully_covered;no mut;flipped	fully_covered	no mut	flipped	19	76	80	0	0	0							02182476214419926_G12	58519847_7_G_12_26979_28041_dmel-5.43-2R_8079756_8079755
02182476214419926_H01	https://transgeneome.mpi-cbg.de/transgeneomics/public/clone.html?wellId=59007615	FlyFos015766(Pp2A-29B[17745]::S000169_fly_pretag)::2XTY1-SGFP-V5-preTEV-BLRP-3XFLAGdFRT	FBgn0260439	Pp2A-29B	Protein phosphatase 2A at 29B, regulatory subunit A of type 2A protein phosphatase, PP2A 65kD subunit A, protein phosphatase 2A, 65 kDa regulatory subunit of protein phosphatase, protein phosphatase 2A at 29B, Pp2A, A/PR65, DPR65, PP2A[A], CG17291, CG13383, PR65, PP2A-29B, CG33297, Pp2A29B, PP2A-A, PP2A, dPP2A A	dmel-5.43-2L(+)::8366009-8370082	dmel-5.43-2L	8366009	8370082	+	dmel-5.43-2L::8361603-8394078	FlyFos015766	43168	8361603	8394078	FlyFos015766[8116-9178]	dmel-5.43-2L(+)[8361603-8394078]		grows	[NGS] validated	fully_covered;no mut;flipped	fully_covered	no mut	flipped	26	115	196	0	0	0							02182476214419926_H01	58519847_7_H_1_8116_9178_dmel-5.43-2L_8361603_8394078
02182476214419926_H02	https://transgeneome.mpi-cbg.de/transgeneomics/public/clone.html?wellId=59007679	FlyFos015781(Gbeta76C[22248]::S000169_fly_pretag)::2XTY1-SGFP-V5-preTEV-BLRP-3XFLAGdFRT	FBgn0004623	Gbeta76C	G protein beta-subunit 76C, guanine nucleotide regulatory protein beta subunit, G[[beta]] eye, G protein beta-subunit 76C, Gbe, Gbeta, Gqbeta, gbe, Gbeta{e}, G[[beta]]e, eGbeta, Galpha76C, eye Gbeta, Gbeta76C, DGqbeta, G[q], CG8770, Gbetae, G[[beta]], Gbeta[[e]]	dmel-5.43-3L(+)::19680728-19683092	dmel-5.43-3L	19680728	19683092	+	dmel-5.43-3L::19653992-19695373	FlyFos015781	52074	19653992	19695373	FlyFos015781[12619-13681]	dmel-5.43-3L(+)[19682756-19682755]		grows	[NGS] validated	fully_covered;no mut;flipped	fully_covered	no mut	flipped	11	47	34	0	0	0							02182476214419926_H02	58519847_7_H_2_12619_13681_dmel-5.43-3L_19682756_19682755
02182476214419926_H04	https://transgeneome.mpi-cbg.de/transgeneomics/public/clone.html?wellId=59007807	FlyFos015808(Rpn9[36279]::S000169_fly_pretag)::2XTY1-SGFP-V5-preTEV-BLRP-3XFLAGdFRT	FBgn0028691	Rpn9	Rpn9, Nobody, Rpn94, l(3)S071806, CT28749, p39A, 718/06, 0718/06, l(3)S071806b, Rpn4, rpn9, CG10230	dmel-5.43-3R(-)::19557225-19559184	dmel-5.43-3R	19557225	19559184	-	dmel-5.43-3R::19544021-19583961	FlyFos015808	50633	19544021	19583961	FlyFos015808[26650-27712]	dmel-5.43-3R(-)[19557313-19557312]		grows	[NGS] validated	fully_covered;no mut;flipped	fully_covered	no mut	flipped	5	17	22	0	0	0							02182476214419926_H04	58519847_7_H_4_26650_27712_dmel-5.43-3R_19557313_19557312
02182476214419926_H05	https://transgeneome.mpi-cbg.de/transgeneomics/public/clone.html?wellId=59007871	FlyFos015816(shd[35754]::S000169_fly_pretag)::2XTY1-SGFP-V5-preTEV-BLRP-3XFLAGdFRT	FBgn0003388	shd	shade, cytochrome P450, Cyp314a1, CG13478, shade, cyp314a1, 314a1, CYP314A1	dmel-5.43-3L(+)::14607558-14615305	dmel-5.43-3L	14607558	14615305	+	dmel-5.43-3L::14603035-14640804	FlyFos015816	48462	14603035	14640804	FlyFos015816[26125-27187]	dmel-5.43-3L(+)[14614681-14614680]		grows	[NGS] validated	fully_covered;no mut;flipped	fully_covered	no mut	flipped	26	139	179	0	0	0							02182476214419926_H05	58519847_7_H_5_26125_27187_dmel-5.43-3L_14614681_14614680
02182476214419926_H06	https://transgeneome.mpi-cbg.de/transgeneomics/public/clone.html?wellId=59007935	FlyFos015827(CG5150[38739]::S000169_fly_pretag)::2XTY1-SGFP-V5-preTEV-BLRP-3XFLAGdFRT	FBgn0035620	CG5150		dmel-5.43-3L(+)::5588646-5590452	dmel-5.43-3L	5588646	5590452	+	dmel-5.43-3L::5561128-5600585	FlyFos015827	50150	5561128	5600585	FlyFos015827[29110-30172]	dmel-5.43-3L(+)[5561128-5600585]		grows	[NGS] validated	fully_covered;no mut;flipped	fully_covered	no mut	flipped	29	119	141	0	0	0		->30733|ATTTTTTTTTTTTTTTG|ATTTTTTTTTTTTTTG(0|13:13)	1	mut oustde of 100	mut_in_tag+1000		02182476214419926_H06	58519847_7_H_6_29110_30172_dmel-5.43-3L_5561128_5600585
02182476214419926_H07	https://transgeneome.mpi-cbg.de/transgeneomics/public/clone.html?wellId=59007999	FlyFos015835(mRpL33[35842]::S000169_fly_pretag)::2XTY1-SGFP-V5-preTEV-BLRP-3XFLAGdFRT	FBgn0040907	mRpL33	mitochondrial ribosomal protein L33, BcDNA:GH15938, L33, CG3712	dmel-5.43-X(-)::4215797-4216234	dmel-5.43-X	4215797	4216234	-	dmel-5.43-X::4189642-4224652	FlyFos015835	45703	4189642	4224652	FlyFos015835[26213-27275]	dmel-5.43-X(-)[4189642-4224652]		grows	[NGS] validated	fully_covered;no mut;flipped	fully_covered	no mut	flipped	10	37	84	0	0	0							02182476214419926_H07	58519847_7_H_7_26213_27275_dmel-5.43-X_4189642_4224652
02182476214419926_H08	https://transgeneome.mpi-cbg.de/transgeneomics/public/clone.html?wellId=59008063	FlyFos015846(CG9399[24019]::S000169_fly_pretag)::2XTY1-SGFP-V5-preTEV-BLRP-3XFLAGdFRT	FBgn0037715	CG9399		dmel-5.43-3R(-)::5397633-5399927	dmel-5.43-3R	5397633	5399927	-	dmel-5.43-3R::5383833-5426517	FlyFos015846	53377	5383833	5426517	FlyFos015846[14390-15452]	dmel-5.43-3R(-)[5383833-5426517]		grows	[NGS] validated	fully_covered;no mut;flipped	fully_covered	no mut	flipped	32	90	188	0	0	0							02182476214419926_H08	58519847_7_H_8_14390_15452_dmel-5.43-3R_5383833_5426517
02182476214419926_H09	https://transgeneome.mpi-cbg.de/transgeneomics/public/clone.html?wellId=59008127	FlyFos015851(CG30047[16528]::S000169_fly_pretag)::2XTY1-SGFP-V5-preTEV-BLRP-3XFLAGdFRT	FBgn0050047	CG30047		dmel-5.43-2R(+)::8239298-8242918	dmel-5.43-2R	8239298	8242918	+	dmel-5.43-2R::8210355-8249692	FlyFos015851	50030	8210355	8249692	FlyFos015851[6899-7961]	dmel-5.43-2R(+)[8242795-8242794]		grows	[NGS] validated	fully_covered;no mut;flipped	fully_covered	no mut	flipped	32	133	181	0	0	0							02182476214419926_H09	58519847_7_H_9_6899_7961_dmel-5.43-2R_8242795_8242794
02182476214419926_H10	https://transgeneome.mpi-cbg.de/transgeneomics/public/clone.html?wellId=59008191	FlyFos015867(CG31183[26793]::S000169_fly_pretag)::2XTY1-SGFP-V5-preTEV-BLRP-3XFLAGdFRT	FBgn0051183	CG31183	CG11846, FBgn0038379, GYC, CG4224	dmel-5.43-3R(-)::11683801-11695774	dmel-5.43-3R	11683801	11695774	-	dmel-5.43-3R::11666893-11702676	FlyFos015867	46476	11666893	11702676	FlyFos015867[17164-18226]	dmel-5.43-3R(-)[11666893-11702676]		grows	[NGS] validated	fully_covered;no mut;flipped	fully_covered	no mut	flipped	34	192	129	0	0	0							02182476214419926_H10	58519847_7_H_10_17164_18226_dmel-5.43-3R_11666893_11702676
02182476214419926_H11	https://transgeneome.mpi-cbg.de/transgeneomics/public/clone.html?wellId=59008255	FlyFos015888(Fie[19671]::S000169_fly_pretag)::2XTY1-SGFP-V5-preTEV-BLRP-3XFLAGdFRT	FBgn0026592	Fie	Fire exit, CG1079, BEST:HL04053, CG1079, HL04053	dmel-5.43-3L(+)::3892574-3894833	dmel-5.43-3L	3892574	3894833	+	dmel-5.43-3L::3871148-3904296	FlyFos015888	43841	3871148	3904296	FlyFos015888[10042-11104]	dmel-5.43-3L(+)[3894256-3894255]		grows	[NGS] validated	fully_covered;no mut;flipped	fully_covered	no mut	flipped	33	182	179	0	0	0							02182476214419926_H11	58519847_7_H_11_10042_11104_dmel-5.43-3L_3894256_3894255
02182476214419926_H12	https://transgeneome.mpi-cbg.de/transgeneomics/public/clone.html?wellId=59008319	FlyFos015915(CG8858[36283]::S000169_fly_pretag)::2XTY1-SGFP-V5-preTEV-BLRP-3XFLAGdFRT	FBgn0033698	CG8858		dmel-5.43-2R(-)::8079872-8086343	dmel-5.43-2R	8079872	8086343	-	dmel-5.43-2R::8072484-8106733	FlyFos015915	44942	8072484	8106733	FlyFos015915[26654-27716]	dmel-5.43-2R(-)[8080081-8080080]		grows	[NGS] validated	fully_covered;no mut;flipped	fully_covered	no mut	flipped	26	108	121	0	0	0							02182476214419926_H12	58519847_7_H_12_26654_27716_dmel-5.43-2R_8080081_8080080
03996259806504221_A04	https://transgeneome.mpi-cbg.de/transgeneomics/public/clone.html?wellId=59057977	FlyFos026498(CG3191[35238]::S000169_fly_pretag)::2XTY1-SGFP-V5-preTEV-BLRP-3XFLAGdFRT	FBgn0023525	CG3191	EG:30B8.3, CG18842, 62D9.a, BEST:GM01072	dmel-5.43-X(-)::2144178-2146026	dmel-5.43-X	2144178	2146026	-	dmel-5.43-X::2132505-2169949	FlyFos026498	48137	2132505	2169949	FlyFos026498[25609-26671]	dmel-5.43-X(-)[2144342-2144341]		grows	[NGS] validated	fully_covered;no mut;flipped	fully_covered	no mut	flipped	16	72	94	0	0	0							03996259806504221_A04	58519847_73_A_4_25609_26671_dmel-5.43-X_2144342_2144341
03996259806504221_A05	https://transgeneome.mpi-cbg.de/transgeneomics/public/clone.html?wellId=59058041	FlyFos026506(CG14269[41600]::S000169_fly_pretag)::2XTY1-SGFP-V5-preTEV-BLRP-3XFLAGdFRT	FBgn0029658	CG14269		dmel-5.43-X(-)::3329006-3329840	dmel-5.43-X	3329006	3329840	-	dmel-5.43-X::3325650-3361093	FlyFos026506	46136	3325650	3361093	FlyFos026506[31971-33033]	dmel-5.43-X(-)[3329124-3329123]		grows	[NGS] validated	fully_covered;no mut;flipped	fully_covered	no mut	flipped	40	325	272	0	0	0							03996259806504221_A05	58519847_73_A_5_31971_33033_dmel-5.43-X_3329124_3329123
03996259806504221_A06	https://transgeneome.mpi-cbg.de/transgeneomics/public/clone.html?wellId=59058105	FlyFos026516(Pmm45A[19266]::S000169_fly_pretag)::2XTY1-SGFP-V5-preTEV-BLRP-3XFLAGdFRT	FBgn0033377	Pmm45A	Phosphomannomutase 45A, CG8073	dmel-5.43-2R(-)::4994647-4997228	dmel-5.43-2R	4994647	4997228	-	dmel-5.43-2R::4985270-5018375	FlyFos026516	43798	4985270	5018375	FlyFos026516[9637-10699]	dmel-5.43-2R(-)[4985270-5018375]		grows	[NGS] validated	fully_covered;no mut;flipped	fully_covered	no mut	flipped	27	108	174	0	0	0							03996259806504221_A06	58519847_73_A_6_9637_10699_dmel-5.43-2R_4985270_5018375
03996259806504221_A08	https://transgeneome.mpi-cbg.de/transgeneomics/public/clone.html?wellId=59058233	FlyFos026539(l(1)G0144[24854]::S000169_fly_pretag)::2XTY1-SGFP-V5-preTEV-BLRP-3XFLAGdFRT	FBgn0027296	l(1)G0144	lethal (1) G0144, CG3073	dmel-5.43-X(-)::2154236-2156560	dmel-5.43-X	2154236	2156560	-	dmel-5.43-X::2132507-2169953	FlyFos026539	48139	2132507	2169953	FlyFos026539[15225-16287]	dmel-5.43-X(-)[2154730-2154729]		grows	[NGS] validated	fully_covered;no mut;flipped	fully_covered	no mut	flipped	32	109	222	0	0	0							03996259806504221_A08	58519847_73_A_8_15225_16287_dmel-5.43-X_2154730_2154729
03996259806504221_A09	https://transgeneome.mpi-cbg.de/transgeneomics/public/clone.html?wellId=59058297	FlyFos026550(CSN1a[15567]::S000169_fly_pretag)::2XTY1-SGFP-V5-preTEV-BLRP-3XFLAGdFRT	FBgn0028838	CSN1a	COP9 complex homolog subunit 1 a, Drosophila COP9 signalosome homolog 1, BG:DS06874.2, csn1, CG4697, Csn1A, CH1-1, Dch1-1, CSN1b, Dch1, CSN1, COP9	dmel-5.43-2L(+)::14762765-14764065	dmel-5.43-2L	14762765	14764065	+	dmel-5.43-2L::14758016-14797738	FlyFos026550	50415	14758016	14797738	FlyFos026550[5938-7000]	dmel-5.43-2L(+)[14758016-14797738]		grows	[NGS] validated	fully_covered;no mut;flipped	fully_covered	no mut	flipped	37	180	163	0	0	0							03996259806504221_A09	58519847_73_A_9_5938_7000_dmel-5.43-2L_14758016_14797738
03996259806504221_A10	https://transgeneome.mpi-cbg.de/transgeneomics/public/clone.html?wellId=59058361	FlyFos026564(CG11630[27516]::S000169_fly_pretag)::2XTY1-SGFP-V5-preTEV-BLRP-3XFLAGdFRT	FBgn0032964	CG11630		dmel-5.43-2L(-)::21782118-21784013	dmel-5.43-2L	21782118	21784013	-	dmel-5.43-2L::21759663-21800006	FlyFos026564	51036	21759663	21800006	FlyFos026564[17887-18949]	dmel-5.43-2L(-)[21782121-21782120]		grows	[NGS] validated	fully_covered;no mut;flipped	fully_covered	no mut	flipped	48	267	285	0	0	0							03996259806504221_A10	58519847_73_A_10_17887_18949_dmel-5.43-2L_21782121_21782120
03996259806504221_A11	https://transgeneome.mpi-cbg.de/transgeneomics/public/clone.html?wellId=59058425	FlyFos026598(CG17377[32645]::S000169_fly_pretag)::2XTY1-SGFP-V5-preTEV-BLRP-3XFLAGdFRT	FBgn0031859	CG17377	anon-WO0140519.32, BEST:LP06279	dmel-5.43-2L(-)::6801378-6802789	dmel-5.43-2L	6801378	6802789	-	dmel-5.43-2L::6778628-6820635	FlyFos026598	52700	6778628	6820635	FlyFos026598[23016-24078]	dmel-5.43-2L(-)[6778628-6820635]		grows	[NGS] validated	fully_covered;no mut;flipped	fully_covered	no mut	flipped	42	253	217	0	0	0							03996259806504221_A11	58519847_73_A_11_23016_24078_dmel-5.43-2L_6778628_6820635
03996259806504221_A12	https://transgeneome.mpi-cbg.de/transgeneomics/public/clone.html?wellId=59058489	FlyFos026612(Lrrk[25326]::S000169_fly_pretag)::2XTY1-SGFP-V5-preTEV-BLRP-3XFLAGdFRT	FBgn0038816	Lrrk	Leucine-rich repeat kinase, CG5483, LRRK, LRRK2, CT17358, CG5483, dLRRK, lrrk, LRRK	dmel-5.43-3R(+)::16461910-16469856	dmel-5.43-3R	16461910	16469856	+	dmel-5.43-3R::16454158-16491091	FlyFos026612	47626	16454158	16491091	FlyFos026612[15697-16759]	dmel-5.43-3R(+)[16454158-16491091]		grows	[NGS] validated	fully_covered;no mut;flipped	fully_covered	no mut	flipped	23	109	121	0	0	0							03996259806504221_A12	58519847_73_A_12_15697_16759_dmel-5.43-3R_16454158_16491091
03996259806504221_B01	https://transgeneome.mpi-cbg.de/transgeneomics/public/clone.html?wellId=59057793	FlyFos026452(CG32971[24961]::S000169_fly_pretag)::2XTY1-SGFP-V5-preTEV-BLRP-3XFLAGdFRT	FBgn0052971	CG32971		dmel-5.43-2L(+)::14274795-14278002	dmel-5.43-2L	14274795	14278002	+	dmel-5.43-2L::14250369-14293245	FlyFos026452	53569	14250369	14293245	FlyFos026452[15332-16394]	dmel-5.43-2L(+)[14277915-14277914]		grows	[NGS] validated	fully_covered;no mut;flipped	fully_covered	no mut	flipped	34	225	175	0	0	0							03996259806504221_B01	58519847_73_B_1_15332_16394_dmel-5.43-2L_14277915_14277914
03996259806504221_B02	https://transgeneome.mpi-cbg.de/transgeneomics/public/clone.html?wellId=59057857	FlyFos026476(CG8738[29979]::S000169_fly_pretag)::2XTY1-SGFP-V5-preTEV-BLRP-3XFLAGdFRT	FBgn0033321	CG8738	c-SPH121, SPH121	dmel-5.43-2R(+)::4583931-4586088	dmel-5.43-2R	4583931	4586088	+	dmel-5.43-2R::4565679-4607014	FlyFos026476	52028	4565679	4607014	FlyFos026476[20350-21412]	dmel-5.43-2R(+)[4565679-4607014]		grows	[NGS] validated	fully_covered;no mut;flipped	fully_covered	no mut	flipped	30	139	111	0	0	0							03996259806504221_B02	58519847_73_B_2_20350_21412_dmel-5.43-2R_4565679_4607014
03996259806504221_B04	https://transgeneome.mpi-cbg.de/transgeneomics/public/clone.html?wellId=59057985	FlyFos026499(CG34045[22169]::S000169_fly_pretag)::2XTY1-SGFP-V5-preTEV-BLRP-3XFLAGdFRT	FBgn0054045	CG34045	BP1009	dmel-5.43-2R(+)::15218394-15222693	dmel-5.43-2R	15218394	15222693	+	dmel-5.43-2R::15210152-15232385	FlyFos026499	32926	15210152	15232385	FlyFos026499[12540-13602]	dmel-5.43-2R(+)[15210152-15232385]		grows	[NGS] validated	fully_covered;no mut;flipped	fully_covered	no mut	flipped	62	461	377	0	0	0							03996259806504221_B04	58519847_73_B_4_12540_13602_dmel-5.43-2R_15210152_15232385
03996259806504221_B05	https://transgeneome.mpi-cbg.de/transgeneomics/public/clone.html?wellId=59058049	FlyFos026509(CG13566[24892]::S000169_fly_pretag)::2XTY1-SGFP-V5-preTEV-BLRP-3XFLAGdFRT	FBgn0034942	CG13566		dmel-5.43-2R(-)::19849178-19850034	dmel-5.43-2R	19849178	19850034	-	dmel-5.43-2R::19833919-19875872	FlyFos026509	52646	19833919	19875872	FlyFos026509[15263-16325]	dmel-5.43-2R(-)[19833919-19875872]		grows	[NGS] validated	fully_covered;no mut;flipped	fully_covered	no mut	flipped	27	102	125	0	0	0							03996259806504221_B05	58519847_73_B_5_15263_16325_dmel-5.43-2R_19833919_19875872
03996259806504221_B06	https://transgeneome.mpi-cbg.de/transgeneomics/public/clone.html?wellId=59058113	FlyFos026516(CG11784[35021]::S000169_fly_pretag)::2XTY1-SGFP-V5-preTEV-BLRP-3XFLAGdFRT	FBgn0033381	CG11784	BcDNA:LD22317	dmel-5.43-2R(+)::5009630-5010814	dmel-5.43-2R	5009630	5010814	+	dmel-5.43-2R::4985270-5018375	FlyFos026516	43798	4985270	5018375	FlyFos026516[25392-26454]	dmel-5.43-2R(+)[4985270-5018375]		grows	[NGS] validated	fully_covered;no mut;flipped	fully_covered	no mut	flipped	41	206	119	0	0	0							03996259806504221_B06	58519847_73_B_6_25392_26454_dmel-5.43-2R_4985270_5018375
03996259806504221_B07	https://transgeneome.mpi-cbg.de/transgeneomics/public/clone.html?wellId=59058177	FlyFos026519(Elp3[21407]::S000169_fly_pretag)::2XTY1-SGFP-V5-preTEV-BLRP-3XFLAGdFRT	FBgn0031604	Elp3	Elongator complex protein 3, Elongator Protein 3, Elp3, CG15433, elongator protein 3, Dmel/ELP3, elp-3, elp3, D-elp3, ELP3, CG15433, HAT, dmHAG408, Dmel\ELP3	dmel-5.43-2L(+)::4444732-4446765	dmel-5.43-2L	4444732	4446765	+	dmel-5.43-2L::4426533-4458414	FlyFos026519	42574	4426533	4458414	FlyFos026519[11778-12840]	dmel-5.43-2L(+)[4446638-4446637]		grows	[NGS] validated	fully_covered;no mut;flipped	fully_covered	no mut	flipped	36	171	149	0	0	0							03996259806504221_B07	58519847_73_B_7_11778_12840_dmel-5.43-2L_4446638_4446637
03996259806504221_B08	https://transgeneome.mpi-cbg.de/transgeneomics/public/clone.html?wellId=59058241	FlyFos026539(CG2924[19763]::S000169_fly_pretag)::2XTY1-SGFP-V5-preTEV-BLRP-3XFLAGdFRT	FBgn0023528	CG2924	EG:25E8.2, NICE5	dmel-5.43-X(-)::2159024-2164789	dmel-5.43-X	2159024	2164789	-	dmel-5.43-X::2132507-2169953	FlyFos026539	48139	2132507	2169953	FlyFos026539[10134-11196]	dmel-5.43-X(-)[2159821-2159820]		grows	[NGS] validated	fully_covered;no mut;flipped	fully_covered	no mut	flipped	34	139	226	0	0	0							03996259806504221_B08	58519847_73_B_8_10134_11196_dmel-5.43-X_2159821_2159820
03996259806504221_B09	https://transgeneome.mpi-cbg.de/transgeneomics/public/clone.html?wellId=59058305	FlyFos026550(CG4701[18773]::S000169_fly_pretag)::2XTY1-SGFP-V5-preTEV-BLRP-3XFLAGdFRT	FBgn0028868	CG4701	BG:DS06874.3, DmDM19DC4Z	dmel-5.43-2L(+)::14765908-14767225	dmel-5.43-2L	14765908	14767225	+	dmel-5.43-2L::14758016-14797738	FlyFos026550	50415	14758016	14797738	FlyFos026550[9144-10206]	dmel-5.43-2L(+)[14758016-14797738]		grows	[NGS] validated	fully_covered;no mut;flipped	fully_covered	no mut	flipped	19	137	68	0	0	0							03996259806504221_B09	58519847_73_B_9_9144_10206_dmel-5.43-2L_14758016_14797738
03996259806504221_B11	https://transgeneome.mpi-cbg.de/transgeneomics/public/clone.html?wellId=59058433	FlyFos026598(CG17376[31106]::S000169_fly_pretag)::2XTY1-SGFP-V5-preTEV-BLRP-3XFLAGdFRT	FBgn0042189	CG17376	bs29c06.y1, CG18461	dmel-5.43-2L(-)::6799946-6800834	dmel-5.43-2L	6799946	6800834	-	dmel-5.43-2L::6778628-6820635	FlyFos026598	52700	6778628	6820635	FlyFos026598[21477-22539]	dmel-5.43-2L(-)[6778628-6820635]		grows	[NGS] validated	fully_covered;no mut;flipped	fully_covered	no mut	flipped	39	246	250	0	0	0							03996259806504221_B11	58519847_73_B_11_21477_22539_dmel-5.43-2L_6778628_6820635
03996259806504221_B12	https://transgeneome.mpi-cbg.de/transgeneomics/public/clone.html?wellId=59058497	FlyFos026615(CG30114[40083]::S000169_fly_pretag)::2XTY1-SGFP-V5-preTEV-BLRP-3XFLAGdFRT	FBgn0050114	CG30114		dmel-5.43-2R(+)::14095260-14096483	dmel-5.43-2R	14095260	14096483	+	dmel-5.43-2R::14065304-14105489	FlyFos026615	50878	14065304	14105489	FlyFos026615[30454-31516]	dmel-5.43-2R(+)[14065304-14105489]		grows	[NGS] validated	fully_covered;no mut;flipped	fully_covered	no mut	flipped	8	33	33	0	0	0							03996259806504221_B12	58519847_73_B_12_30454_31516_dmel-5.43-2R_14065304_14105489
03996259806504221_C01	https://transgeneome.mpi-cbg.de/transgeneomics/public/clone.html?wellId=59057801	FlyFos026458(CG42240[31118]::S000169_fly_pretag)::2XTY1-SGFP-V5-preTEV-BLRP-3XFLAGdFRT	FBgn0250869	CG42240	CG15893	dmel-5.43-X(+)::6224891-6226783	dmel-5.43-X	6224891	6226783	+	dmel-5.43-X::6204142-6247700	FlyFos026458	54251	6204142	6247700	FlyFos026458[21489-22551]	dmel-5.43-X(+)[6204142-6247700]		grows	[NGS] validated	fully_covered;no mut;flipped	fully_covered	no mut	flipped	35	235	144	0	0	0							03996259806504221_C01	58519847_73_C_1_21489_22551_dmel-5.43-X_6204142_6247700
03996259806504221_C02	https://transgeneome.mpi-cbg.de/transgeneomics/public/clone.html?wellId=59057865	FlyFos026476(CG8586[25294]::S000169_fly_pretag)::2XTY1-SGFP-V5-preTEV-BLRP-3XFLAGdFRT	FBgn0033320	CG8586	SPH58, c-SPH58	dmel-5.43-2R(-)::4581244-4583301	dmel-5.43-2R	4581244	4583301	-	dmel-5.43-2R::4565679-4607014	FlyFos026476	52028	4565679	4607014	FlyFos026476[15665-16727]	dmel-5.43-2R(-)[4565679-4607014]		grows	[NGS] validated	fully_covered;no mut;flipped	fully_covered	no mut	flipped	26	104	125	0	0	0							03996259806504221_C02	58519847_73_C_2_15665_16727_dmel-5.43-2R_4565679_4607014
03996259806504221_C03	https://transgeneome.mpi-cbg.de/transgeneomics/public/clone.html?wellId=59057929	FlyFos026485(CG11313[25347]::S000169_fly_pretag)::2XTY1-SGFP-V5-preTEV-BLRP-3XFLAGdFRT	FBgn0039798	CG11313	SP11, c-SP11	dmel-5.43-3R(-)::26555559-26567010	dmel-5.43-3R	26555559	26567010	-	dmel-5.43-3R::26539935-26573631	FlyFos026485	44389	26539935	26573631	FlyFos026485[15718-16780]	dmel-5.43-3R(-)[26539935-26573631]		grows	[NGS] validated	fully_covered;no mut;flipped	fully_covered	no mut	flipped	43	241	206	0	0	0							03996259806504221_C03	58519847_73_C_3_15718_16780_dmel-5.43-3R_26539935_26573631
03996259806504221_C05	https://transgeneome.mpi-cbg.de/transgeneomics/public/clone.html?wellId=59058057	FlyFos026509(mr[38572]::S000169_fly_pretag)::2XTY1-SGFP-V5-preTEV-BLRP-3XFLAGdFRT	FBgn0002791	mr	morula, Morula, APC2, CG3060, APC2/mr, dAPC2, Apc2	dmel-5.43-2R(+)::19859956-19862935	dmel-5.43-2R	19859956	19862935	+	dmel-5.43-2R::19833919-19875872	FlyFos026509	52646	19833919	19875872	FlyFos026509[28943-30005]	dmel-5.43-2R(+)[19833919-19875872]		grows	[NGS] validated	fully_covered;no mut;flipped	fully_covered	no mut	flipped	38	186	225	0	0	0							03996259806504221_C05	58519847_73_C_5_28943_30005_dmel-5.43-2R_19833919_19875872
03996259806504221_C06	https://transgeneome.mpi-cbg.de/transgeneomics/public/clone.html?wellId=59058121	FlyFos026516(Phax[27796]::S000169_fly_pretag)::2XTY1-SGFP-V5-preTEV-BLRP-3XFLAGdFRT	FBgn0033380	Phax	Phosphorylated adaptor for RNA export, PHosphorylated Adaptor for RNA Export, dPHAX, CG8069, BEST:GH22533	dmel-5.43-2R(+)::5001768-5003535	dmel-5.43-2R	5001768	5003535	+	dmel-5.43-2R::4985270-5018375	FlyFos026516	43798	4985270	5018375	FlyFos026516[18167-19229]	dmel-5.43-2R(+)[4985270-5018375]		grows	[NGS] validated	fully_covered;no mut;flipped	fully_covered	no mut	flipped	13	63	52	0	0	0							03996259806504221_C06	58519847_73_C_6_18167_19229_dmel-5.43-2R_4985270_5018375
03996259806504221_C07	https://transgeneome.mpi-cbg.de/transgeneomics/public/clone.html?wellId=59058185	FlyFos026519(CG43056[29868]::S000169_fly_pretag)::2XTY1-SGFP-V5-preTEV-BLRP-3XFLAGdFRT	FBgn0262358	CG43056		dmel-5.43-2L(+)::4437787-4438201	dmel-5.43-2L	4437787	4438201	+	dmel-5.43-2L::4426533-4458414	FlyFos026519	42574	4426533	4458414	FlyFos026519[20239-21301]	dmel-5.43-2L(+)[4438177-4438176]		grows	[NGS] validated	fully_covered;no mut;flipped	fully_covered	no mut	flipped	11	90	45	0	0	0							03996259806504221_C07	58519847_73_C_7_20239_21301_dmel-5.43-2L_4438177_4438176
03996259806504221_C08	https://transgeneome.mpi-cbg.de/transgeneomics/public/clone.html?wellId=59058249	FlyFos026539(CG3071[20982]::S000169_fly_pretag)::2XTY1-SGFP-V5-preTEV-BLRP-3XFLAGdFRT	FBgn0023527	CG3071	EG:25E8.3	dmel-5.43-X(+)::2156873-2158858	dmel-5.43-X	2156873	2158858	+	dmel-5.43-X::2132507-2169953	FlyFos026539	48139	2132507	2169953	FlyFos026539[11353-12415]	dmel-5.43-X(+)[2158602-2158601]		grows	[NGS] validated	fully_covered;no mut;flipped	fully_covered	no mut	flipped	26	184	157	0	0	0							03996259806504221_C08	58519847_73_C_8_11353_12415_dmel-5.43-X_2158602_2158601
03996259806504221_C09	https://transgeneome.mpi-cbg.de/transgeneomics/public/clone.html?wellId=59058313	FlyFos026550(CG4691[13371]::S000169_fly_pretag)::2XTY1-SGFP-V5-preTEV-BLRP-3XFLAGdFRT	FBgn0028870	CG4691	BG:DS06874.1, anon-WO0140519.47	dmel-5.43-2L(+)::14760767-14761924	dmel-5.43-2L	14760767	14761924	+	dmel-5.43-2L::14758016-14797738	FlyFos026550	50415	14758016	14797738	FlyFos026550[3742-4804]	dmel-5.43-2L(+)[14758016-14797738]		grows	[NGS] validated	fully_covered;no mut;flipped	fully_covered	no mut	flipped	46	264	208	0	0	0							03996259806504221_C09	58519847_73_C_9_3742_4804_dmel-5.43-2L_14758016_14797738
03996259806504221_C11	https://transgeneome.mpi-cbg.de/transgeneomics/public/clone.html?wellId=59058441	FlyFos026600(CG15673[27392]::S000169_fly_pretag)::2XTY1-SGFP-V5-preTEV-BLRP-3XFLAGdFRT	FBgn0034639	CG15673		dmel-5.43-2R(-)::17495898-17500594	dmel-5.43-2R	17495898	17500594	-	dmel-5.43-2R::17478400-17518079	FlyFos026600	50372	17478400	17518079	FlyFos026600[17763-18825]	dmel-5.43-2R(-)[17478400-17518079]		grows	[NGS] validated	fully_covered;no mut;flipped	fully_covered	no mut	flipped	44	273	252	0	0	0							03996259806504221_C11	58519847_73_C_11_17763_18825_dmel-5.43-2R_17478400_17518079
03996259806504221_D01	https://transgeneome.mpi-cbg.de/transgeneomics/public/clone.html?wellId=59057809	FlyFos026458(CG15894[27372]::S000169_fly_pretag)::2XTY1-SGFP-V5-preTEV-BLRP-3XFLAGdFRT	FBgn0029864	CG15894		dmel-5.43-X(+)::6210131-6221886	dmel-5.43-X	6210131	6221886	+	dmel-5.43-X::6204142-6247700	FlyFos026458	54251	6204142	6247700	FlyFos026458[17743-18805]	dmel-5.43-X(+)[6204142-6247700]		grows	[NGS] validated	fully_covered;no mut;flipped	fully_covered	no mut	flipped	29	142	137	0	0	0							03996259806504221_D01	58519847_73_D_1_17743_18805_dmel-5.43-X_6204142_6247700
03996259806504221_D02	https://transgeneome.mpi-cbg.de/transgeneomics/public/clone.html?wellId=59057873	FlyFos026476(Jon44E[23738]::S000169_fly_pretag)::2XTY1-SGFP-V5-preTEV-BLRP-3XFLAGdFRT	FBgn0001285	Jon44E	Jonah 44E, Jonah 43E, Jon43E, SP100, CG8579	dmel-5.43-2R(+)::4578955-4579856	dmel-5.43-2R	4578955	4579856	+	dmel-5.43-2R::4565679-4607014	FlyFos026476	52028	4565679	4607014	FlyFos026476[14109-15171]	dmel-5.43-2R(+)[4565679-4607014]		grows	[NGS] validated	fully_covered;no mut;flipped	fully_covered	no mut	flipped	30	109	139	0	0	0							03996259806504221_D02	58519847_73_D_2_14109_15171_dmel-5.43-2R_4565679_4607014
03996259806504221_D03	https://transgeneome.mpi-cbg.de/transgeneomics/public/clone.html?wellId=59057937	FlyFos026486(Or45b[29852]::S000169_fly_pretag)::2XTY1-SGFP-V5-preTEV-BLRP-3XFLAGdFRT	FBgn0033422	Or45b	Odorant receptor 45b, CG12931, 45F.1, 45b, DOR107	dmel-5.43-2R(+)::5447103-5448573	dmel-5.43-2R	5447103	5448573	+	dmel-5.43-2R::5431010-5468792	FlyFos026486	48475	5431010	5468792	FlyFos026486[20223-21285]	dmel-5.43-2R(+)[5448571-5448570]		grows	[NGS] validated	fully_covered;no mut;flipped	fully_covered	no mut	flipped	32	163	163	0	0	0							03996259806504221_D03	58519847_73_D_3_20223_21285_dmel-5.43-2R_5448571_5448570
03996259806504221_D11	https://transgeneome.mpi-cbg.de/transgeneomics/public/clone.html?wellId=59058449	FlyFos026600(CG18870[34332]::S000169_fly_pretag)::2XTY1-SGFP-V5-preTEV-BLRP-3XFLAGdFRT	FBgn0042180	CG18870	anon-57Fa	dmel-5.43-2R(-)::17502268-17504398	dmel-5.43-2R	17502268	17504398	-	dmel-5.43-2R::17478400-17518079	FlyFos026600	50372	17478400	17518079	FlyFos026600[24703-25765]	dmel-5.43-2R(-)[17478400-17518079]		grows	[NGS] validated	fully_covered;no mut;flipped	fully_covered	no mut	flipped	27	138	171	0	0	0							03996259806504221_D11	58519847_73_D_11_24703_25765_dmel-5.43-2R_17478400_17518079
03996259806504221_E01	https://transgeneome.mpi-cbg.de/transgeneomics/public/clone.html?wellId=59057817	FlyFos026460(mRpS7[19239]::S000169_fly_pretag)::2XTY1-SGFP-V5-preTEV-BLRP-3XFLAGdFRT	FBgn0032236	mRpS7	mitochondrial ribosomal protein S7, mRPS7, RpS7, MRP-S7, CG5108	dmel-5.43-2L(+)::10386664-10387524	dmel-5.43-2L	10386664	10387524	+	dmel-5.43-2L::10360762-10397080	FlyFos026460	47011	10360762	10397080	FlyFos026460[9610-10672]	dmel-5.43-2L(+)[10387472-10387471]		grows	[NGS] validated	fully_covered;no mut;flipped	fully_covered	no mut	flipped	14	59	51	0	0	0							03996259806504221_E01	58519847_73_E_1_9610_10672_dmel-5.43-2L_10387472_10387471
03996259806504221_E02	https://transgeneome.mpi-cbg.de/transgeneomics/public/clone.html?wellId=59057881	FlyFos026476(PGRP-SC1a[41774]::S000169_fly_pretag)::2XTY1-SGFP-V5-preTEV-BLRP-3XFLAGdFRT	FBgn0043576	PGRP-SC1a	PGRP-SC1a, Peptidoglycan-recognition protein-SC1a precursor, picky, PGRP-SC, CG14746, PGRP-SC1A, PGRP-SC1, PGRP SC	dmel-5.43-2R(+)::4597268-4597825	dmel-5.43-2R	4597268	4597825	+	dmel-5.43-2R::4565679-4607014	FlyFos026476	52028	4565679	4607014	FlyFos026476[32145-33207]	dmel-5.43-2R(+)[4565679-4607014]		grows	[NGS] validated	fully_covered;no mut;flipped	fully_covered	no mut	flipped	30	150	118	0	0	0							03996259806504221_E02	58519847_73_E_2_32145_33207_dmel-5.43-2R_4565679_4607014
03996259806504221_E03	https://transgeneome.mpi-cbg.de/transgeneomics/public/clone.html?wellId=59057945	FlyFos026486(CG1809[27126]::S000169_fly_pretag)::2XTY1-SGFP-V5-preTEV-BLRP-3XFLAGdFRT	FBgn0033423	CG1809		dmel-5.43-2R(+)::5449154-5451378	dmel-5.43-2R	5449154	5451378	+	dmel-5.43-2R::5431010-5468792	FlyFos026486	48475	5431010	5468792	FlyFos026486[17497-18559]	dmel-5.43-2R(+)[5451297-5451296]		grows	[NGS] validated	fully_covered;no mut;flipped	fully_covered	no mut	flipped	46	275	260	0	0	0							03996259806504221_E03	58519847_73_E_3_17497_18559_dmel-5.43-2R_5451297_5451296
03996259806504221_E04	https://transgeneome.mpi-cbg.de/transgeneomics/public/clone.html?wellId=59058009	FlyFos026504(Nep3[44498]::S000169_fly_pretag)::2XTY1-SGFP-V5-preTEV-BLRP-3XFLAGdFRT	FBgn0031081	Nep3	Neprilysin 3, NEP3, DmeNEP3, CEC, dNEP3, CG9565	dmel-5.43-X(+)::19855330-19862712	dmel-5.43-X	19855330	19862712	+	dmel-5.43-X::19826623-19875026	FlyFos026504	59096	19826623	19875026	FlyFos026504[34869-35931]	dmel-5.43-X(+)[19826623-19875026]		grows	[NGS] validated	fully_covered;no mut;flipped	fully_covered	no mut	flipped	34	227	159	0	0	0							03996259806504221_E04	58519847_73_E_4_34869_35931_dmel-5.43-X_19826623_19875026
03996259806504221_E05	https://transgeneome.mpi-cbg.de/transgeneomics/public/clone.html?wellId=59058073	FlyFos026514(TwdlP[24404]::S000169_fly_pretag)::2XTY1-SGFP-V5-preTEV-BLRP-3XFLAGdFRT	FBgn0039435	TwdlP	TweedleP, CG14240, CG14240	dmel-5.43-3R(-)::22446330-22447082	dmel-5.43-3R	22446330	22447082	-	dmel-5.43-3R::22430815-22461160	FlyFos026514	41038	22430815	22461160	FlyFos026514[14775-15837]	dmel-5.43-3R(-)[22446387-22446386]		grows	[NGS] validated	fully_covered;no mut;flipped	fully_covered	no mut	flipped	48	313	317	0	0	0							03996259806504221_E05	58519847_73_E_5_14775_15837_dmel-5.43-3R_22446387_22446386
03996259806504221_E07	https://transgeneome.mpi-cbg.de/transgeneomics/public/clone.html?wellId=59058201	FlyFos026519(CG34178[33091]::S000169_fly_pretag)::2XTY1-SGFP-V5-preTEV-BLRP-3XFLAGdFRT	FBgn0085207	CG34178		dmel-5.43-2L(+)::4433908-4435057	dmel-5.43-2L	4433908	4435057	+	dmel-5.43-2L::4426533-4458414	FlyFos026519	42574	4426533	4458414	FlyFos026519[23462-24524]	dmel-5.43-2L(+)[4434954-4434953]		grows	[NGS] validated	fully_covered;no mut;flipped	fully_covered	no mut	flipped	39	294	281	0	0	0							03996259806504221_E07	58519847_73_E_7_23462_24524_dmel-5.43-2L_4434954_4434953
03996259806504221_E08	https://transgeneome.mpi-cbg.de/transgeneomics/public/clone.html?wellId=59058265	FlyFos026539(CG3091[32952]::S000169_fly_pretag)::2XTY1-SGFP-V5-preTEV-BLRP-3XFLAGdFRT	FBgn0029608	CG3091		dmel-5.43-X(-)::2146365-2148167	dmel-5.43-X	2146365	2148167	-	dmel-5.43-X::2132507-2169953	FlyFos026539	48139	2132507	2169953	FlyFos026539[23323-24385]	dmel-5.43-X(-)[2146632-2146631]		grows	[NGS] validated	fully_covered;no mut;flipped	fully_covered	no mut	flipped	37	153	224	0	0	0							03996259806504221_E08	58519847_73_E_8_23323_24385_dmel-5.43-X_2146632_2146631
03996259806504221_E12	https://transgeneome.mpi-cbg.de/transgeneomics/public/clone.html?wellId=59058521	FlyFos026629(CG7695[38592]::S000169_fly_pretag)::2XTY1-SGFP-V5-preTEV-BLRP-3XFLAGdFRT	FBgn0038631	CG7695		dmel-5.43-3R(-)::14442476-14443233	dmel-5.43-3R	14442476	14443233	-	dmel-5.43-3R::14432539-14471667	FlyFos026629	49821	14432539	14471667	FlyFos026629[28963-30025]	dmel-5.43-3R(-)[14442706-14442705]		grows	[NGS] validated	fully_covered;no mut;flipped	fully_covered	no mut	flipped	48	232	276	0	0	0							03996259806504221_E12	58519847_73_E_12_28963_30025_dmel-5.43-3R_14442706_14442705
03996259806504221_F01	https://transgeneome.mpi-cbg.de/transgeneomics/public/clone.html?wellId=59057825	FlyFos026465(CG15124[21003]::S000169_fly_pretag)::2XTY1-SGFP-V5-preTEV-BLRP-3XFLAGdFRT	FBgn0034461	CG15124		dmel-5.43-2R(+)::15530452-15531203	dmel-5.43-2R	15530452	15531203	+	dmel-5.43-2R::15504783-15542488	FlyFos026465	48398	15504783	15542488	FlyFos026465[11374-12436]	dmel-5.43-2R(+)[15531116-15531115]		grows	[NGS] validated	fully_covered;no mut;flipped	fully_covered	no mut	flipped	26	105	91	0	0	0							03996259806504221_F01	58519847_73_F_1_11374_12436_dmel-5.43-2R_15531116_15531115
03996259806504221_F02	https://transgeneome.mpi-cbg.de/transgeneomics/public/clone.html?wellId=59057889	FlyFos026479(SuUR[21566]::S000169_fly_pretag)::2XTY1-SGFP-V5-preTEV-BLRP-3XFLAGdFRT	FBgn0025355	SuUR	Suppressor of Under-Replication, suppressor of underreplication, Suppressor of UnderReplication, Suppressor of underreplication, Suppressor of Underreplication, su(UR)ES, SUUR, Su(UR), CG7869, Su(UR)ES, Dromel_CG7869_FBtr0076203_suur_mORF, SU(UR)	dmel-5.43-3L(+)::11058097-11062125	dmel-5.43-3L	11058097	11062125	+	dmel-5.43-3L::11039439-11073575	FlyFos026479	44829	11039439	11073575	FlyFos026479[11937-12999]	dmel-5.43-3L(+)[11061640-11061639]		grows	[NGS] validated	fully_covered;no mut;flipped	fully_covered	no mut	flipped	16	75	90	0	0	0							03996259806504221_F02	58519847_73_F_2_11937_12999_dmel-5.43-3L_11061640_11061639
03996259806504221_F03	https://transgeneome.mpi-cbg.de/transgeneomics/public/clone.html?wellId=59057953	FlyFos026492(CG15353[32856]::S000169_fly_pretag)::2XTY1-SGFP-V5-preTEV-BLRP-3XFLAGdFRT	FBgn0040718	CG15353	BcDNA:RH63135	dmel-5.43-2L(-)::2006763-2007193	dmel-5.43-2L	2006763	2007193	-	dmel-5.43-2L::1993499-2030132	FlyFos026492	47326	1993499	2030132	FlyFos026492[23227-24289]	dmel-5.43-2L(-)[2006907-2006906]		grows	[NGS] validated	fully_covered;no mut;flipped	fully_covered	no mut	flipped	48	251	244	0	0	0							03996259806504221_F03	58519847_73_F_3_23227_24289_dmel-5.43-2L_2006907_2006906
03996259806504221_F04	https://transgeneome.mpi-cbg.de/transgeneomics/public/clone.html?wellId=59058017	FlyFos026504(CG12655[35543]::S000169_fly_pretag)::2XTY1-SGFP-V5-preTEV-BLRP-3XFLAGdFRT	FBgn0031080	CG12655		dmel-5.43-X(-)::19852426-19853421	dmel-5.43-X	19852426	19853421	-	dmel-5.43-X::19826623-19875026	FlyFos026504	59096	19826623	19875026	FlyFos026504[25914-26976]	dmel-5.43-X(-)[19826623-19875026]		grows	[NGS] validated	fully_covered;no mut;flipped	fully_covered	no mut	flipped	57	180	337	0	0	0							03996259806504221_F04	58519847_73_F_4_25914_26976_dmel-5.43-X_19826623_19875026
03996259806504221_F05	https://transgeneome.mpi-cbg.de/transgeneomics/public/clone.html?wellId=59058081	FlyFos026514(TwdlJ[14291]::S000169_fly_pretag)::2XTY1-SGFP-V5-preTEV-BLRP-3XFLAGdFRT	FBgn0039440	TwdlJ	TweedleJ, CG5471, CG5471	dmel-5.43-3R(+)::22455678-22456502	dmel-5.43-3R	22455678	22456502	+	dmel-5.43-3R::22430815-22461160	FlyFos026514	41038	22430815	22461160	FlyFos026514[4662-5724]	dmel-5.43-3R(+)[22456500-22456499]		grows	[NGS] validated	fully_covered;no mut;flipped	fully_covered	no mut	flipped	20	85	77	0	0	0							03996259806504221_F05	58519847_73_F_5_4662_5724_dmel-5.43-3R_22456500_22456499
03996259806504221_F06	https://transgeneome.mpi-cbg.de/transgeneomics/public/clone.html?wellId=59058145	FlyFos026518(Rab-RP4[39089]::S000169_fly_pretag)::2XTY1-SGFP-V5-preTEV-BLRP-3XFLAGdFRT	FBgn0015794	Rab-RP4	Rab-related protein 4, rab-related protein 4, AAF46057, Rab-r4, DRabRP4, DmRab18, DRABR4, Rab18, Rab18/RP4, CG3129	dmel-5.43-X(-)::5564860-5565842	dmel-5.43-X	5564860	5565842	-	dmel-5.43-X::5535492-5571379	FlyFos026518	46580	5535492	5571379	FlyFos026518[29460-30522]	dmel-5.43-X(-)[5535492-5571379]		grows	[NGS] validated	fully_covered;no mut;flipped	fully_covered	no mut	flipped	39	150	207	0	0	0							03996259806504221_F06	58519847_73_F_6_29460_30522_dmel-5.43-X_5535492_5571379
03996259806504221_F07	https://transgeneome.mpi-cbg.de/transgeneomics/public/clone.html?wellId=59058209	FlyFos026519(CG34177[33647]::S000169_fly_pretag)::2XTY1-SGFP-V5-preTEV-BLRP-3XFLAGdFRT	FBgn0085206	CG34177		dmel-5.43-2L(+)::4433908-4435057	dmel-5.43-2L	4433908	4435057	+	dmel-5.43-2L::4426533-4458414	FlyFos026519	42574	4426533	4458414	FlyFos026519[24018-25080]	dmel-5.43-2L(+)[4434398-4434397]		grows	[NGS] validated	fully_covered;no mut;flipped	fully_covered	no mut	flipped	43	235	241	0	0	0							03996259806504221_F07	58519847_73_F_7_24018_25080_dmel-5.43-2L_4434398_4434397
03996259806504221_F08	https://transgeneome.mpi-cbg.de/transgeneomics/public/clone.html?wellId=59058273	FlyFos026540(CG4218[32294]::S000169_fly_pretag)::2XTY1-SGFP-V5-preTEV-BLRP-3XFLAGdFRT	FBgn0250844	CG4218	anon-SAGE:Wang-133, anon-SAGE:Wang-118, anon-SAGE:Wang-133, BG:DS04641.8, anon-SAGE:Wang-118	dmel-5.43-2L(-)::14547520-14549075	dmel-5.43-2L	14547520	14549075	-	dmel-5.43-2L::14524980-14563251	FlyFos026540	48964	14524980	14563251	FlyFos026540[22665-23727]	dmel-5.43-2L(-)[14524980-14563251]		grows	[NGS] validated	fully_covered;no mut;flipped	fully_covered	no mut	flipped	35	143	279	0	0	0							03996259806504221_F08	58519847_73_F_8_22665_23727_dmel-5.43-2L_14524980_14563251
03996259806504221_F09	https://transgeneome.mpi-cbg.de/transgeneomics/public/clone.html?wellId=59058337	FlyFos026558(Jon66Ci[39021]::S000169_fly_pretag)::2XTY1-SGFP-V5-preTEV-BLRP-3XFLAGdFRT	FBgn0035886	Jon66Ci	Jonah 66Ci, Jonah 66C, CG7118, SP171, 66C, Jon66C	dmel-5.43-3L(+)::8384642-8385479	dmel-5.43-3L	8384642	8385479	+	dmel-5.43-3L::8356047-8396854	FlyFos026558	51500	8356047	8396854	FlyFos026558[29392-30454]	dmel-5.43-3L(+)[8356047-8396854]		grows	[NGS] validated	fully_covered;no mut;flipped	fully_covered	no mut	flipped	6	29	26	0	0	0							03996259806504221_F09	58519847_73_F_9_29392_30454_dmel-5.43-3L_8356047_8396854
03996259806504221_F10	https://transgeneome.mpi-cbg.de/transgeneomics/public/clone.html?wellId=59058401	FlyFos026571(CG12920[23835]::S000169_fly_pretag)::2XTY1-SGFP-V5-preTEV-BLRP-3XFLAGdFRT	FBgn0033481	CG12920		dmel-5.43-2R(+)::5956614-5958572	dmel-5.43-2R	5956614	5958572	+	dmel-5.43-2R::5934903-5972670	FlyFos026571	48460	5934903	5972670	FlyFos026571[14206-15268]	dmel-5.43-2R(+)[5958466-5958465]		grows	[NGS] validated	fully_covered;no mut;flipped	fully_covered	no mut	flipped	45	220	188	0	0	0							03996259806504221_F10	58519847_73_F_10_14206_15268_dmel-5.43-2R_5958466_5958465
03996259806504221_F11	https://transgeneome.mpi-cbg.de/transgeneomics/public/clone.html?wellId=59058465	FlyFos026606(CG7432[33542]::S000169_fly_pretag)::2XTY1-SGFP-V5-preTEV-BLRP-3XFLAGdFRT	FBgn0038727	CG7432	c-SP19, SP19	dmel-5.43-3R(+)::15490818-15496549	dmel-5.43-3R	15490818	15496549	+	dmel-5.43-3R::15472428-15511556	FlyFos026606	49821	15472428	15511556	FlyFos026606[23913-24975]	dmel-5.43-3R(+)[15472428-15511556]		grows	[NGS] validated	fully_covered;no mut;flipped	fully_covered	no mut	flipped	11	43	58	0	0	0							03996259806504221_F11	58519847_73_F_11_23913_24975_dmel-5.43-3R_15472428_15511556
03996259806504221_F12	https://transgeneome.mpi-cbg.de/transgeneomics/public/clone.html?wellId=59058529	FlyFos026632(CG2926[21710]::S000169_fly_pretag)::2XTY1-SGFP-V5-preTEV-BLRP-3XFLAGdFRT	FBgn0037344	CG2926		dmel-5.43-3R(-)::1405023-1414097	dmel-5.43-3R	1405023	1414097	-	dmel-5.43-3R::1393789-1427195	FlyFos026632	44099	1393789	1427195	FlyFos026632[12081-13143]	dmel-5.43-3R(-)[1393789-1427195]		grows	[NGS] validated	fully_covered;no mut;flipped	fully_covered	no mut	flipped	10	31	42	0	0	0							03996259806504221_F12	58519847_73_F_12_12081_13143_dmel-5.43-3R_1393789_1427195
03996259806504221_G03	https://transgeneome.mpi-cbg.de/transgeneomics/public/clone.html?wellId=59057961	FlyFos026492(CG33543[41986]::S000169_fly_pretag)::2XTY1-SGFP-V5-preTEV-BLRP-3XFLAGdFRT	FBgn0053543	CG33543	CG15355, CT35363, CG15354, CT35364	dmel-5.43-2L(-)::1997102-2006307	dmel-5.43-2L	1997102	2006307	-	dmel-5.43-2L::1993499-2030132	FlyFos026492	47326	1993499	2030132	FlyFos026492[32357-33419]	dmel-5.43-2L(-)[1997777-1997776]		grows	[NGS] validated	fully_covered;no mut;flipped	fully_covered	no mut	flipped	21	103	116	0	0	0							03996259806504221_G03	58519847_73_G_3_32357_33419_dmel-5.43-2L_1997777_1997776
03996259806504221_G05	https://transgeneome.mpi-cbg.de/transgeneomics/public/clone.html?wellId=59058089	FlyFos026514(TwdlB[22498]::S000169_fly_pretag)::2XTY1-SGFP-V5-preTEV-BLRP-3XFLAGdFRT	FBgn0039436	TwdlB	TweedleB, CG6478, CG6478	dmel-5.43-3R(-)::22448173-22449270	dmel-5.43-3R	22448173	22449270	-	dmel-5.43-3R::22430815-22461160	FlyFos026514	41038	22430815	22461160	FlyFos026514[12869-13931]	dmel-5.43-3R(-)[22448293-22448292]		grows	[NGS] validated	fully_covered;no mut;flipped	fully_covered	no mut	flipped	45	220	266	0	0	0							03996259806504221_G05	58519847_73_G_5_12869_13931_dmel-5.43-3R_22448293_22448292
03996259806504221_G06	https://transgeneome.mpi-cbg.de/transgeneomics/public/clone.html?wellId=59058153	FlyFos026518(RpL35[41617]::S000169_fly_pretag)::2XTY1-SGFP-V5-preTEV-BLRP-3XFLAGdFRT	FBgn0029785	RpL35	Ribosomal protein L35, anon-fast-evolving-1C12, Rp L35, anon-EST:Posey157, CG4111, BcDNA:RE09547, anon-EST:fe1C12, RpL35e	dmel-5.43-X(+)::5566475-5567576	dmel-5.43-X	5566475	5567576	+	dmel-5.43-X::5535492-5571379	FlyFos026518	46580	5535492	5571379	FlyFos026518[31988-33050]	dmel-5.43-X(+)[5535492-5571379]		grows	[NGS] validated	fully_covered;no mut;flipped	fully_covered	no mut	flipped	38	214	141	0	0	0							03996259806504221_G06	58519847_73_G_6_31988_33050_dmel-5.43-X_5535492_5571379
03996259806504221_G07	https://transgeneome.mpi-cbg.de/transgeneomics/public/clone.html?wellId=59058217	FlyFos026530(skap[17399]::S000169_fly_pretag)::2XTY1-SGFP-V5-preTEV-BLRP-3XFLAGdFRT	FBgn0037643	skap	skpA associated protein, CG11963, SkpA Associated Protein, CG11963, Skap, CGI 1963, SkAP	dmel-5.43-3R(+)::4764405-4768749	dmel-5.43-3R	4764405	4768749	+	dmel-5.43-3R::4743819-4776322	FlyFos026530	43196	4743819	4776322	FlyFos026530[7770-8832]	dmel-5.43-3R(+)[4768554-4768553]		grows	[NGS] validated	fully_covered;no mut;flipped	fully_covered	no mut	flipped	48	355	266	0	0	0							03996259806504221_G07	58519847_73_G_7_7770_8832_dmel-5.43-3R_4768554_4768553
03996259806504221_G08	https://transgeneome.mpi-cbg.de/transgeneomics/public/clone.html?wellId=59058281	FlyFos026545(CG5792[21126]::S000169_fly_pretag)::2XTY1-SGFP-V5-preTEV-BLRP-3XFLAGdFRT	FBgn0032455	CG5792		dmel-5.43-2L(-)::12713276-12721957	dmel-5.43-2L	12713276	12721957	-	dmel-5.43-2L::12701847-12742036	FlyFos026545	50882	12701847	12742036	FlyFos026545[11497-12559]	dmel-5.43-2L(-)[12701847-12742036]		grows	[NGS] validated	fully_covered;no mut;flipped	fully_covered	no mut	flipped	32	200	243	0	0	0							03996259806504221_G08	58519847_73_G_8_11497_12559_dmel-5.43-2L_12701847_12742036
03996259806504221_G11	https://transgeneome.mpi-cbg.de/transgeneomics/public/clone.html?wellId=59058473	FlyFos026607(CG4477[29401]::S000169_fly_pretag)::2XTY1-SGFP-V5-preTEV-BLRP-3XFLAGdFRT	FBgn0035971	CG4477		dmel-5.43-3L(+)::9243325-9244438	dmel-5.43-3L	9243325	9244438	+	dmel-5.43-3L::9221376-9264202	FlyFos026607	53519	9221376	9264202	FlyFos026607[19772-20834]	dmel-5.43-3L(+)[9244432-9244431]		grows	[NGS] validated	fully_covered;no mut;flipped	fully_covered	no mut	flipped	47	337	345	0	0	0							03996259806504221_G11	58519847_73_G_11_19772_20834_dmel-5.43-3L_9244432_9244431
03996259806504221_H01	https://transgeneome.mpi-cbg.de/transgeneomics/public/clone.html?wellId=59057841	FlyFos026475(CG4768[17781]::S000169_fly_pretag)::2XTY1-SGFP-V5-preTEV-BLRP-3XFLAGdFRT	FBgn0030790	CG4768		dmel-5.43-X(+)::16686154-16690789	dmel-5.43-X	16686154	16690789	+	dmel-5.43-X::16661626-16697499	FlyFos026475	46566	16661626	16697499	FlyFos026475[8152-9214]	dmel-5.43-X(+)[16689349-16689348]		grows	[NGS] validated	fully_covered;no mut;flipped	fully_covered	no mut	flipped	42	192	155	0	0	0							03996259806504221_H01	58519847_73_H_1_8152_9214_dmel-5.43-X_16689349_16689348
03996259806504221_H02	https://transgeneome.mpi-cbg.de/transgeneomics/public/clone.html?wellId=59057905	FlyFos026479(CG7888[30858]::S000169_fly_pretag)::2XTY1-SGFP-V5-preTEV-BLRP-3XFLAGdFRT	FBgn0036116	CG7888		dmel-5.43-3L(+)::11047137-11052759	dmel-5.43-3L	11047137	11052759	+	dmel-5.43-3L::11039439-11073575	FlyFos026479	44829	11039439	11073575	FlyFos026479[21229-22291]	dmel-5.43-3L(+)[11052348-11052347]		grows	[NGS] validated	fully_covered;no mut;flipped	fully_covered	no mut	flipped	35	140	140	0	0	0							03996259806504221_H02	58519847_73_H_2_21229_22291_dmel-5.43-3L_11052348_11052347
03996259806504221_H04	https://transgeneome.mpi-cbg.de/transgeneomics/public/clone.html?wellId=59058033	FlyFos026505(CG10428[24924]::S000169_fly_pretag)::2XTY1-SGFP-V5-preTEV-BLRP-3XFLAGdFRT	FBgn0032724	CG10428		dmel-5.43-2L(+)::18948897-18950973	dmel-5.43-2L	18948897	18950973	+	dmel-5.43-2L::18929204-18966215	FlyFos026505	47704	18929204	18966215	FlyFos026505[15295-16357]	dmel-5.43-2L(+)[18950922-18950921]		grows	[NGS] validated	fully_covered;no mut;flipped	fully_covered	no mut	flipped	20	120	101	0	0	0							03996259806504221_H04	58519847_73_H_4_15295_16357_dmel-5.43-2L_18950922_18950921
03996259806504221_H05	https://transgeneome.mpi-cbg.de/transgeneomics/public/clone.html?wellId=59058097	FlyFos026516(Mys45A[23539]::S000169_fly_pretag)::2XTY1-SGFP-V5-preTEV-BLRP-3XFLAGdFRT	FBgn0033379	Mys45A	Mystery 45A, anon-WO0118547.170, CG8070, Mys-45A	dmel-5.43-2R(-)::4999010-5001458	dmel-5.43-2R	4999010	5001458	-	dmel-5.43-2R::4985270-5018375	FlyFos026516	43798	4985270	5018375	FlyFos026516[13910-14972]	dmel-5.43-2R(-)[4985270-5018375]		grows	[NGS] validated	fully_covered;no mut;flipped	fully_covered	no mut	flipped	48	297	276	0	0	0							03996259806504221_H05	58519847_73_H_5_13910_14972_dmel-5.43-2R_4985270_5018375
03996259806504221_H06	https://transgeneome.mpi-cbg.de/transgeneomics/public/clone.html?wellId=59058161	FlyFos026518(Sirt4[32903]::S000169_fly_pretag)::2XTY1-SGFP-V5-preTEV-BLRP-3XFLAGdFRT	FBgn0029783	Sirt4	Sirt4, dSIRT4, dmSRT407, CG3187, D.mel3	dmel-5.43-X(-)::5558661-5560002	dmel-5.43-X	5558661	5560002	-	dmel-5.43-X::5535492-5571379	FlyFos026518	46580	5535492	5571379	FlyFos026518[23274-24336]	dmel-5.43-X(-)[5535492-5571379]		grows	[NGS] validated	fully_covered;no mut;flipped	fully_covered	no mut	flipped	40	141	228	0	0	0							03996259806504221_H06	58519847_73_H_6_23274_24336_dmel-5.43-X_5535492_5571379
03996259806504221_H07	https://transgeneome.mpi-cbg.de/transgeneomics/public/clone.html?wellId=59058225	FlyFos026530(osk[22866]::S000169_fly_pretag)::2XTY1-SGFP-V5-preTEV-BLRP-3XFLAGdFRT	FBgn0003015	osk	oskar, Dmoskar, Oskar, Dm-osk, CG10901, Osk, OSK, Oskar	dmel-5.43-3R(+)::4760853-4764117	dmel-5.43-3R	4760853	4764117	+	dmel-5.43-3R::4743819-4776322	FlyFos026530	43196	4743819	4776322	FlyFos026530[13237-14299]	dmel-5.43-3R(+)[4763087-4763086]		grows	[NGS] validated	fully_covered;no mut;flipped	fully_covered	no mut	flipped	51	352	284	0	0	0							03996259806504221_H07	58519847_73_H_7_13237_14299_dmel-5.43-3R_4763087_4763086
03996259806504221_H10	https://transgeneome.mpi-cbg.de/transgeneomics/public/clone.html?wellId=59058417	FlyFos026572(PPYR1[35964]::S000169_fly_pretag)::2XTY1-SGFP-V5-preTEV-BLRP-3XFLAGdFRT	FBgn0030623	PPYR1	Protein phosphatase Y regulator 1, protein phosphatase Y regulator 1, CG15031, BcDNA:AT19571, CG15031	dmel-5.43-X(-)::15137885-15138946	dmel-5.43-X	15137885	15138946	-	dmel-5.43-X::15111610-15151021	FlyFos026572	50104	15111610	15151021	FlyFos026572[26335-27397]	dmel-5.43-X(-)[15111610-15151021]		grows	[NGS] validated	fully_covered;no mut;flipped	fully_covered	no mut	flipped	50	242	238	0	0	0		->25635|A|C(0|58:58)	1	mut oustde of 100	mut_in_tag+1000		03996259806504221_H10	58519847_73_H_10_26335_27397_dmel-5.43-X_15111610_15151021
03996259806504221_H11	https://transgeneome.mpi-cbg.de/transgeneomics/public/clone.html?wellId=59058481	FlyFos026610(mfrn[20358]::S000169_fly_pretag)::2XTY1-SGFP-V5-preTEV-BLRP-3XFLAGdFRT	FBgn0039561	mfrn	mitoferrin, anon-fast-evolving-2H5, CG4963, Mfrn, anon-EST:fe2H5, HD35059, dmfrn, CG4963	dmel-5.43-3R(-)::23768511-23773731	dmel-5.43-3R	23768511	23773731	-	dmel-5.43-3R::23758979-23786136	FlyFos026610	37850	23758979	23786136	FlyFos026610[10729-11791]	dmel-5.43-3R(-)[23758979-23786136]		grows	[NGS] validated	fully_covered;no mut;flipped	fully_covered	no mut	flipped	43	232	276	0	0	0							03996259806504221_H11	58519847_73_H_11_10729_11791_dmel-5.43-3R_23758979_23786136
03996259806504221_H12	https://transgeneome.mpi-cbg.de/transgeneomics/public/clone.html?wellId=59058545	FlyFos026632(noi[31387]::S000169_fly_pretag)::2XTY1-SGFP-V5-preTEV-BLRP-3XFLAGdFRT	FBgn0014366	noi	noisette, Noisette, l(3)j3E7, ms3225, CG2925, Noi, SF3a[60], U2, SF3A3	dmel-5.43-3R(-)::1415323-1417180	dmel-5.43-3R	1415323	1417180	-	dmel-5.43-3R::1393789-1427195	FlyFos026632	44099	1393789	1427195	FlyFos026632[21758-22820]	dmel-5.43-3R(-)[1393789-1427195]		grows	[NGS] validated	fully_covered;no mut;flipped	fully_covered	no mut	flipped	39	156	211	0	0	0							03996259806504221_H12	58519847_73_H_12_21758_22820_dmel-5.43-3R_1393789_1427195
05512796956240418_A02	https://transgeneome.mpi-cbg.de/transgeneomics/public/clone.html?wellId=59012950	FlyFos016823(Hsp27[27110]::S000169_fly_pretag)::2XTY1-SGFP-V5-preTEV-BLRP-3XFLAGdFRT	FBgn0001226	Hsp27	Heat shock protein 27, Hsp 27, heat shock protein hsp27, Protein 27, 27K, hsp-27, Dhsp27, 28, CG4466, HSP27, small hsp locus 67B, DmHsp27, hsp27, hsp27/26, hsp 27, HSP28, hsp26, hsp28, Hsp28, anon-WO0140519.69	dmel-5.43-3L(+)::9377165-9378382	dmel-5.43-3L	9377165	9378382	+	dmel-5.43-3L::9360445-9389871	FlyFos016823	40119	9360445	9389871	FlyFos016823[17481-18543]	dmel-5.43-3L(+)[9360445-9389871]		grows	[NGS] validated	fully_covered;no mut;flipped	fully_covered	no mut	flipped	41	226	159	0	0	0							05512796956240418_A02	58519847_14_A_2_17481_18543_dmel-5.43-3L_9360445_9389871
05512796956240418_A03	https://transgeneome.mpi-cbg.de/transgeneomics/public/clone.html?wellId=59013014	FlyFos016834(FK506-bp1[31655]::S000169_fly_pretag)::2XTY1-SGFP-V5-preTEV-BLRP-3XFLAGdFRT	FBgn0013269	FK506-bp1	FK506-binding protein 1, FK506-binding protein of 39 kDa, IFK506-bp1, FKBP39, FK506bp1, FKbp39, CG6226	dmel-5.43-3R(-)::11157306-11158864	dmel-5.43-3R	11157306	11158864	-	dmel-5.43-3R::11135404-11172448	FlyFos016834	47737	11135404	11172448	FlyFos016834[22026-23088]	dmel-5.43-3R(-)[11135404-11172448]		grows	[NGS] validated	fully_covered;no mut;flipped	fully_covered	no mut	flipped	35	131	174	0	0	0							05512796956240418_A03	58519847_14_A_3_22026_23088_dmel-5.43-3R_11135404_11172448
05512796956240418_A04	https://transgeneome.mpi-cbg.de/transgeneomics/public/clone.html?wellId=59013078	FlyFos016842(RpI135[42090]::S000169_fly_pretag)::2XTY1-SGFP-V5-preTEV-BLRP-3XFLAGdFRT	FBgn0003278	RpI135	RNA polymerase I 135kD subunit, RNA polymerase I, l(2)k16513, DmRP135, RP135, RpIII135, CG4033	dmel-5.43-2L(+)::404305-407969	dmel-5.43-2L	404305	407969	+	dmel-5.43-2L::375432-412246	FlyFos016842	47507	375432	412246	FlyFos016842[32461-33523]	dmel-5.43-2L(+)[375432-412246]		grows	[NGS] validated	fully_covered;no mut;flipped	fully_covered	no mut	flipped	11	77	35	0	0	0							05512796956240418_A04	58519847_14_A_4_32461_33523_dmel-5.43-2L_375432_412246
05512796956240418_A05	https://transgeneome.mpi-cbg.de/transgeneomics/public/clone.html?wellId=59013142	FlyFos016860(l(1)dd4[19213]::S000169_fly_pretag)::2XTY1-SGFP-V5-preTEV-BLRP-3XFLAGdFRT	FBgn0001612	l(1)dd4	lethal (1) discs degenerate 4, gamma-tubulin ring protein 91, DGrip91, Dgrip91, Dgrips91, dGRIP91, l(1)d.deg.4, l(1)d.deg.-4, Dgrip9, DGrip91, Grip91, Dgrip91, dd4, GCP3, l(1)d deg-4, l(1)G0122, Dd4, Dgrips91, GRIP91, CG10988, anon-WO03040301.197	dmel-5.43-X(-)::13630603-13638688	dmel-5.43-X	13630603	13638688	-	dmel-5.43-X::13621555-13655039	FlyFos016860	44177	13621555	13655039	FlyFos016860[9584-10646]	dmel-5.43-X(-)[13621555-13655039]		grows	[NGS] validated	fully_covered;no mut;flipped	fully_covered	no mut	flipped	42	281	265	0	0	0							05512796956240418_A05	58519847_14_A_5_9584_10646_dmel-5.43-X_13621555_13655039
05512796956240418_A06	https://transgeneome.mpi-cbg.de/transgeneomics/public/clone.html?wellId=59013206	FlyFos016881(CG1806[12669]::S000169_fly_pretag)::2XTY1-SGFP-V5-preTEV-BLRP-3XFLAGdFRT	FBgn0030360	CG1806		dmel-5.43-X(+)::11901211-11903940	dmel-5.43-X	11901211	11903940	+	dmel-5.43-X::11873188-11906854	FlyFos016881	44359	11873188	11906854	FlyFos016881[3040-4102]	dmel-5.43-X(+)[11903816-11903815]		grows	[NGS] validated	fully_covered;no mut;flipped	fully_covered	no mut	flipped	33	191	137	0	0	0							05512796956240418_A06	58519847_14_A_6_3040_4102_dmel-5.43-X_11903816_11903815
05512796956240418_A07	https://transgeneome.mpi-cbg.de/transgeneomics/public/clone.html?wellId=59013270	FlyFos016889(CG9733[29268]::S000169_fly_pretag)::2XTY1-SGFP-V5-preTEV-BLRP-3XFLAGdFRT	FBgn0039759	CG9733	pro-phenoloxidase AE, POAE-like Serine protease, SP10, proAE, c-SP10, proPO-AE	dmel-5.43-3R(-)::26069698-26072425	dmel-5.43-3R	26069698	26072425	-	dmel-5.43-3R::26057407-26089468	FlyFos016889	42754	26057407	26089468	FlyFos016889[19639-20701]	dmel-5.43-3R(-)[26069831-26069830]		grows	[NGS] validated	fully_covered;no mut;flipped	fully_covered	no mut	flipped	43	252	237	0	0	0							05512796956240418_A07	58519847_14_A_7_19639_20701_dmel-5.43-3R_26069831_26069830
05512796956240418_A08	https://transgeneome.mpi-cbg.de/transgeneomics/public/clone.html?wellId=59013334	FlyFos016896(be[33320]::S000169_fly_pretag)::2XTY1-SGFP-V5-preTEV-BLRP-3XFLAGdFRT	FBgn0052594	be	ben, Gene A, E protein, CG32594, E, CG5530, CG15026, ben, BEST:LD10566, anon-EST:CL1a5	dmel-5.43-X(+)::14918467-14936093	dmel-5.43-X	14918467	14936093	+	dmel-5.43-X::14904431-14939957	FlyFos016896	46219	14904431	14939957	FlyFos016896[23691-24753]	dmel-5.43-X(+)[14904431-14939957]		grows	[NGS] validated	fully_covered;no mut;flipped	fully_covered	no mut	flipped	15	77	83	0	0	0							05512796956240418_A08	58519847_14_A_8_23691_24753_dmel-5.43-X_14904431_14939957
05512796956240418_A09	https://transgeneome.mpi-cbg.de/transgeneomics/public/clone.html?wellId=59013398	FlyFos016907(ChLD3[25182]::S000169_fly_pretag)::2XTY1-SGFP-V5-preTEV-BLRP-3XFLAGdFRT	FBgn0032598	ChLD3	ChLD3, CG17905, DmChLD3, DmCDA3, CG17905	dmel-5.43-2L(+)::16738852-16742610	dmel-5.43-2L	16738852	16742610	+	dmel-5.43-2L::16726671-16759991	FlyFos016907	44013	16726671	16759991	FlyFos016907[15553-16615]	dmel-5.43-2L(+)[16726671-16759991]		grows	[NGS] validated	fully_covered;no mut;flipped	fully_covered	no mut	flipped	47	300	255	0	0	0							05512796956240418_A09	58519847_14_A_9_15553_16615_dmel-5.43-2L_16726671_16759991
05512796956240418_A10	https://transgeneome.mpi-cbg.de/transgeneomics/public/clone.html?wellId=59013462	FlyFos016922(Jon99Fi[14764]::S000169_fly_pretag)::2XTY1-SGFP-V5-preTEV-BLRP-3XFLAGdFRT	FBgn0039778	Jon99Fi	Jonah 99Fi, Jonah 99F, SPH181, Jon99F, CG18030	dmel-5.43-3R(+)::26314687-26315625	dmel-5.43-3R	26314687	26315625	+	dmel-5.43-3R::26310377-26341570	FlyFos016922	41886	26310377	26341570	FlyFos016922[5135-6197]	dmel-5.43-3R(+)[26310377-26341570]		grows	[NGS] validated	fully_covered;no mut;flipped	fully_covered	no mut	flipped	20	118	108	0	0	0							05512796956240418_A10	58519847_14_A_10_5135_6197_dmel-5.43-3R_26310377_26341570
05512796956240418_B01	https://transgeneome.mpi-cbg.de/transgeneomics/public/clone.html?wellId=59012894	FlyFos016809(skpE[31486]::S000169_fly_pretag)::2XTY1-SGFP-V5-preTEV-BLRP-3XFLAGdFRT	FBgn0031074	skpE	skpE, CG11942, Skp	dmel-5.43-X(-)::19717529-19718032	dmel-5.43-X	19717529	19718032	-	dmel-5.43-X::19708893-19739387	FlyFos016809	41187	19708893	19739387	FlyFos016809[21857-22919]	dmel-5.43-X(-)[19717532-19717531]		grows	[NGS] validated	fully_covered;no mut;flipped	fully_covered	no mut	flipped	40	246	251	0	0	0							05512796956240418_B01	58519847_14_B_1_21857_22919_dmel-5.43-X_19717532_19717531
05512796956240418_B02	https://transgeneome.mpi-cbg.de/transgeneomics/public/clone.html?wellId=59012958	FlyFos016823(CG4461[18369]::S000169_fly_pretag)::2XTY1-SGFP-V5-preTEV-BLRP-3XFLAGdFRT	FBgn0035982	CG4461	148460_at, Hsp20, gh12586, BEST:GH12586	dmel-5.43-3L(+)::9368530-9369393	dmel-5.43-3L	9368530	9369393	+	dmel-5.43-3L::9360445-9389871	FlyFos016823	40119	9360445	9389871	FlyFos016823[8740-9802]	dmel-5.43-3L(+)[9360445-9389871]		grows	[NGS] validated	fully_covered;no mut;flipped	fully_covered	no mut	flipped	29	173	103	0	0	0							05512796956240418_B02	58519847_14_B_2_8740_9802_dmel-5.43-3L_9360445_9389871
05512796956240418_B03	https://transgeneome.mpi-cbg.de/transgeneomics/public/clone.html?wellId=59013022	FlyFos016834(CG6236[25490]::S000169_fly_pretag)::2XTY1-SGFP-V5-preTEV-BLRP-3XFLAGdFRT	FBgn0038318	CG6236		dmel-5.43-3R(-)::11151039-11154000	dmel-5.43-3R	11151039	11154000	-	dmel-5.43-3R::11135404-11172448	FlyFos016834	47737	11135404	11172448	FlyFos016834[15861-16923]	dmel-5.43-3R(-)[11135404-11172448]		grows	[NGS] validated	fully_covered;no mut;flipped	fully_covered	no mut	flipped	7	19	50	0	0	0							05512796956240418_B03	58519847_14_B_3_15861_16923_dmel-5.43-3R_11135404_11172448
05512796956240418_B06	https://transgeneome.mpi-cbg.de/transgeneomics/public/clone.html?wellId=59013214	FlyFos016881(CG18130[32210]::S000169_fly_pretag)::2XTY1-SGFP-V5-preTEV-BLRP-3XFLAGdFRT	FBgn0030359	CG18130		dmel-5.43-X(-)::11884151-11886801	dmel-5.43-X	11884151	11886801	-	dmel-5.43-X::11873188-11906854	FlyFos016881	44359	11873188	11906854	FlyFos016881[22581-23643]	dmel-5.43-X(-)[11884275-11884274]		grows	[NGS] validated	fully_covered;no mut;flipped	fully_covered	no mut	flipped	32	127	210	0	0	0							05512796956240418_B06	58519847_14_B_6_22581_23643_dmel-5.43-X_11884275_11884274
05512796956240418_B07	https://transgeneome.mpi-cbg.de/transgeneomics/public/clone.html?wellId=59013278	FlyFos016889(CG9737[31858]::S000169_fly_pretag)::2XTY1-SGFP-V5-preTEV-BLRP-3XFLAGdFRT	FBgn0039758	CG9737	SP5, c-SP5	dmel-5.43-3R(-)::26066985-26069032	dmel-5.43-3R	26066985	26069032	-	dmel-5.43-3R::26057407-26089468	FlyFos016889	42754	26057407	26089468	FlyFos016889[22229-23291]	dmel-5.43-3R(-)[26067241-26067240]		grows	[NGS] validated	fully_covered;no mut;flipped	fully_covered	no mut	flipped	33	183	174	0	0	0							05512796956240418_B07	58519847_14_B_7_22229_23291_dmel-5.43-3R_26067241_26067240
05512796956240418_B08	https://transgeneome.mpi-cbg.de/transgeneomics/public/clone.html?wellId=59013342	FlyFos016897(CG1416[32650]::S000169_fly_pretag)::2XTY1-SGFP-V5-preTEV-BLRP-3XFLAGdFRT	FBgn0032961	CG1416		dmel-5.43-2L(+)::21758002-21760915	dmel-5.43-2L	21758002	21760915	+	dmel-5.43-2L::21741144-21783640	FlyFos016897	53189	21741144	21783640	FlyFos016897[23021-24083]	dmel-5.43-2L(+)[21760621-21760620]		grows	[NGS] validated	fully_covered;no mut;flipped	fully_covered	no mut	flipped	33	242	176	0	0	0							05512796956240418_B08	58519847_14_B_8_23021_24083_dmel-5.43-2L_21760621_21760620
05512796956240418_B09	https://transgeneome.mpi-cbg.de/transgeneomics/public/clone.html?wellId=59013406	FlyFos016909(lectin-22C[38107]::S000169_fly_pretag)::2XTY1-SGFP-V5-preTEV-BLRP-3XFLAGdFRT	FBgn0259230	lectin-22C	lectin-22C, Lectin 22C, Lectin22C, Lectin, AC004716a, CG15378, AC 004716A, CG42295	dmel-5.43-2L(-)::2036456-2037247	dmel-5.43-2L	2036456	2037247	-	dmel-5.43-2L::2023873-2064935	FlyFos016909	51755	2023873	2064935	FlyFos016909[28478-29540]	dmel-5.43-2L(-)[2036459-2036458]		grows	[NGS] validated	fully_covered;no mut;flipped	fully_covered	no mut	flipped	39	216	265	0	0	0							05512796956240418_B09	58519847_14_B_9_28478_29540_dmel-5.43-2L_2036459_2036458
05512796956240418_B10	https://transgeneome.mpi-cbg.de/transgeneomics/public/clone.html?wellId=59013470	FlyFos016926(Dpy-30L1[44130]::S000169_fly_pretag)::2XTY1-SGFP-V5-preTEV-BLRP-3XFLAGdFRT	FBgn0032293	Dpy-30L1	Dpy-30-like 1, Dpy-30-like 1, CG6444, Dpy-30L1, CG6444, dpy-30L1, dDPY30-L1	dmel-5.43-2L(+)::10732749-10733307	dmel-5.43-2L	10732749	10733307	+	dmel-5.43-2L::10698720-10742462	FlyFos016926	54435	10698720	10742462	FlyFos016926[34501-35563]	dmel-5.43-2L(+)[10698720-10742462]		grows	[NGS] validated	fully_covered;no mut;flipped	fully_covered	no mut	flipped	20	111	58	0	0	0							05512796956240418_B10	58519847_14_B_10_34501_35563_dmel-5.43-2L_10698720_10742462
05512796956240418_B11	https://transgeneome.mpi-cbg.de/transgeneomics/public/clone.html?wellId=59013534	FlyFos016930(polybromo[36250]::S000169_fly_pretag)::2XTY1-SGFP-V5-preTEV-BLRP-3XFLAGdFRT	FBgn0039227	polybromo	polybromo, Polybromo, CG11375, PB, Bap180, bap180, BAF180, baf180, anon-WO0140519.158	dmel-5.43-3R(-)::20625691-20630977	dmel-5.43-3R	20625691	20630977	-	dmel-5.43-3R::20599139-20636925	FlyFos016930	48479	20599139	20636925	FlyFos016930[26621-27683]	dmel-5.43-3R(-)[20599139-20636925]		grows	[NGS] validated	fully_covered;no mut;flipped	fully_covered	no mut	flipped	7	38	33	0	0	0							05512796956240418_B11	58519847_14_B_11_26621_27683_dmel-5.43-3R_20599139_20636925
05512796956240418_B12	https://transgeneome.mpi-cbg.de/transgeneomics/public/clone.html?wellId=59013598	FlyFos016931(CG9883[37111]::S000169_fly_pretag)::2XTY1-SGFP-V5-preTEV-BLRP-3XFLAGdFRT	FBgn0031435	CG9883		dmel-5.43-2L(+)::2577671-2579180	dmel-5.43-2L	2577671	2579180	+	dmel-5.43-2L::2551525-2589392	FlyFos016931	48560	2551525	2589392	FlyFos016931[27482-28544]	dmel-5.43-2L(+)[2551525-2589392]		grows	[NGS] validated	fully_covered;no mut;flipped	fully_covered	no mut	flipped	8	41	48	0	0	0		->26853|T|C(0|23:23);>26950|G|T(0|34:34);>27073|A|G(0|27:27);>27220|T|C(0|25:25);>27319|A|G(0|16:16);>27343|C|T(0|19:19);>27379|A|G(0|24:24);>28797|A|C(0|40:40);>28915|T|A(0|26:26);>29515|A|G(0|23:23)	1	mut oustde of 100	mut_in_tag+1000		05512796956240418_B12	58519847_14_B_12_27482_28544_dmel-5.43-2L_2551525_2589392
05512796956240418_C01	https://transgeneome.mpi-cbg.de/transgeneomics/public/clone.html?wellId=59012902	FlyFos016813(CG14960[19735]::S000169_fly_pretag)::2XTY1-SGFP-V5-preTEV-BLRP-3XFLAGdFRT	FBgn0035428	CG14960		dmel-5.43-3L(+)::3271038-3276255	dmel-5.43-3L	3271038	3276255	+	dmel-5.43-3L::3247669-3286150	FlyFos016813	49174	3247669	3286150	FlyFos016813[10106-11168]	dmel-5.43-3L(+)[3276046-3276045]		grows	[NGS] validated	fully_covered;no mut;flipped	fully_covered	no mut	flipped	25	148	126	0	0	0							05512796956240418_C01	58519847_14_C_1_10106_11168_dmel-5.43-3L_3276046_3276045
05512796956240418_C03	https://transgeneome.mpi-cbg.de/transgeneomics/public/clone.html?wellId=59013030	FlyFos016834(mRpL9[31503]::S000169_fly_pretag)::2XTY1-SGFP-V5-preTEV-BLRP-3XFLAGdFRT	FBgn0038319	mRpL9	mitochondrial ribosomal protein L9, L9, CG31478, CG4923	dmel-5.43-3R(+)::11156462-11157314	dmel-5.43-3R	11156462	11157314	+	dmel-5.43-3R::11135404-11172448	FlyFos016834	47737	11135404	11172448	FlyFos016834[21874-22936]	dmel-5.43-3R(+)[11135404-11172448]		grows	[NGS] validated	fully_covered;no mut;flipped	fully_covered	no mut	flipped	28	150	150	0	0	0							05512796956240418_C03	58519847_14_C_3_21874_22936_dmel-5.43-3R_11135404_11172448
05512796956240418_C05	https://transgeneome.mpi-cbg.de/transgeneomics/public/clone.html?wellId=59013158	FlyFos016865(CG34002[36741]::S000169_fly_pretag)::2XTY1-SGFP-V5-preTEV-BLRP-3XFLAGdFRT	FBgn0054002	CG34002	MIP08535, BP1025	dmel-5.43-3L(+)::17851574-17853582	dmel-5.43-3L	17851574	17853582	+	dmel-5.43-3L::17826374-17865976	FlyFos016865	50295	17826374	17865976	FlyFos016865[27112-28174]	dmel-5.43-3L(+)[17826374-17865976]		grows	[NGS] validated	fully_covered;no mut;flipped	fully_covered	no mut	flipped	42	301	114	0	0	0							05512796956240418_C05	58519847_14_C_5_27112_28174_dmel-5.43-3L_17826374_17865976
05512796956240418_C08	https://transgeneome.mpi-cbg.de/transgeneomics/public/clone.html?wellId=59013350	FlyFos016898(Mst57Da[21729]::S000169_fly_pretag)::2XTY1-SGFP-V5-preTEV-BLRP-3XFLAGdFRT	FBgn0011668	Mst57Da	Male-specific RNA 57Da, CG9074, bs30d07.y1, mst57D, CG9074, mst-1, mst(2)ag-1, BcDNA:GH19893, Mst57D	dmel-5.43-3R(-)::21657297-21657621	dmel-5.43-3R	21657297	21657621	-	dmel-5.43-3R::21645275-21679314	FlyFos016898	44732	21645275	21679314	FlyFos016898[12100-13162]	dmel-5.43-3R(-)[21645275-21679314]		grows	[NGS] validated	fully_covered;no mut;flipped	fully_covered	no mut	flipped	25	130	85	0	0	0							05512796956240418_C08	58519847_14_C_8_12100_13162_dmel-5.43-3R_21645275_21679314
05512796956240418_C09	https://transgeneome.mpi-cbg.de/transgeneomics/public/clone.html?wellId=59013414	FlyFos016911(hig[17871]::S000169_fly_pretag)::2XTY1-SGFP-V5-preTEV-BLRP-3XFLAGdFRT	FBgn0010114	hig	hikaru genki, Hikaru genki, HIG, CG2040, CT6282	dmel-5.43-2R(-)::5115286-5134752	dmel-5.43-2R	5115286	5134752	-	dmel-5.43-2R::5107846-5145631	FlyFos016911	48478	5107846	5145631	FlyFos016911[8242-9304]	dmel-5.43-2R(-)[5107846-5145631]		grows	[NGS] validated	fully_covered;no mut;flipped	fully_covered	no mut	flipped	37	172	222	0	0	0							05512796956240418_C09	58519847_14_C_9_8242_9304_dmel-5.43-2R_5107846_5145631
05512796956240418_C10	https://transgeneome.mpi-cbg.de/transgeneomics/public/clone.html?wellId=59013478	FlyFos016926(Vha16-5[47289]::S000169_fly_pretag)::2XTY1-SGFP-V5-preTEV-BLRP-3XFLAGdFRT	FBgn0032294	Vha16-5	Vacuolar H[+] ATPase subunit 16-5, vha16-5, CG6737	dmel-5.43-2L(-)::10736319-10737576	dmel-5.43-2L	10736319	10737576	-	dmel-5.43-2L::10698720-10742462	FlyFos016926	54435	10698720	10742462	FlyFos016926[37660-38722]	dmel-5.43-2L(-)[10698720-10742462]		grows	[NGS] validated	fully_covered;no mut;flipped	fully_covered	no mut	flipped	23	91	107	0	0	0							05512796956240418_C10	58519847_14_C_10_37660_38722_dmel-5.43-2L_10698720_10742462
05512796956240418_C11	https://transgeneome.mpi-cbg.de/transgeneomics/public/clone.html?wellId=59013542	FlyFos016930(CG6980[44779]::S000169_fly_pretag)::2XTY1-SGFP-V5-preTEV-BLRP-3XFLAGdFRT	FBgn0039228	CG6980	anon-WO0140519.171	dmel-5.43-3R(+)::20633333-20634403	dmel-5.43-3R	20633333	20634403	+	dmel-5.43-3R::20599139-20636925	FlyFos016930	48479	20599139	20636925	FlyFos016930[35150-36212]	dmel-5.43-3R(+)[20599139-20636925]		grows	[NGS] validated	fully_covered;no mut;flipped	fully_covered	no mut	flipped	23	157	93	0	0	0							05512796956240418_C11	58519847_14_C_11_35150_36212_dmel-5.43-3R_20599139_20636925
05512796956240418_D01	https://transgeneome.mpi-cbg.de/transgeneomics/public/clone.html?wellId=59012910	FlyFos016815(CG13613[20013]::S000169_fly_pretag)::2XTY1-SGFP-V5-preTEV-BLRP-3XFLAGdFRT	FBgn0039193	CG13613		dmel-5.43-3R(+)::20191276-20192071	dmel-5.43-3R	20191276	20192071	+	dmel-5.43-3R::20166023-20202451	FlyFos016815	47121	20166023	20202451	FlyFos016815[10384-11446]	dmel-5.43-3R(+)[20192069-20192068]		grows	[NGS] validated	fully_covered;no mut;flipped	fully_covered	no mut	flipped	23	107	70	0	0	0							05512796956240418_D01	58519847_14_D_1_10384_11446_dmel-5.43-3R_20192069_20192068
05512796956240418_D02	https://transgeneome.mpi-cbg.de/transgeneomics/public/clone.html?wellId=59012974	FlyFos016828(CG15641[37206]::S000169_fly_pretag)::2XTY1-SGFP-V5-preTEV-BLRP-3XFLAGdFRT	FBgn0030643	CG15641		dmel-5.43-X(+)::15361924-15362336	dmel-5.43-X	15361924	15362336	+	dmel-5.43-X::15334729-15371323	FlyFos016828	47287	15334729	15371323	FlyFos016828[27577-28639]	dmel-5.43-X(+)[15334729-15371323]		grows	[NGS] validated	fully_covered;no mut;flipped	fully_covered	no mut	flipped	5	40	14	0	0	0							05512796956240418_D02	58519847_14_D_2_27577_28639_dmel-5.43-X_15334729_15371323
05512796956240418_D04	https://transgeneome.mpi-cbg.de/transgeneomics/public/clone.html?wellId=59013102	FlyFos016850(CG8927[36755]::S000169_fly_pretag)::2XTY1-SGFP-V5-preTEV-BLRP-3XFLAGdFRT	FBgn0038405	CG8927		dmel-5.43-3R(+)::12006742-12011958	dmel-5.43-3R	12006742	12011958	+	dmel-5.43-3R::11984709-12027246	FlyFos016850	53230	11984709	12027246	FlyFos016850[27126-28188]	dmel-5.43-3R(+)[11984709-12027246]		grows	[NGS] validated	fully_covered;no mut;flipped	fully_covered	no mut	flipped	26	147	144	0	0	0							05512796956240418_D04	58519847_14_D_4_27126_28188_dmel-5.43-3R_11984709_12027246
05512796956240418_D05	https://transgeneome.mpi-cbg.de/transgeneomics/public/clone.html?wellId=59013166	FlyFos016867(CG6888[17817]::S000169_fly_pretag)::2XTY1-SGFP-V5-preTEV-BLRP-3XFLAGdFRT	FBgn0036490	CG6888	BcDNA:AT16346, 6888	dmel-5.43-3L(+)::15200944-15201692	dmel-5.43-3L	15200944	15201692	+	dmel-5.43-3L::15193427-15229799	FlyFos016867	47065	15193427	15229799	FlyFos016867[8188-9250]	dmel-5.43-3L(+)[15193427-15229799]		grows	[NGS] validated	fully_covered;no mut;flipped	fully_covered	no mut	flipped	38	227	203	0	0	0							05512796956240418_D05	58519847_14_D_5_8188_9250_dmel-5.43-3L_15193427_15229799
05512796956240418_D07	https://transgeneome.mpi-cbg.de/transgeneomics/public/clone.html?wellId=59013294	FlyFos016889(CG9682[20627]::S000169_fly_pretag)::2XTY1-SGFP-V5-preTEV-BLRP-3XFLAGdFRT	FBgn0039760	CG9682	anon-WO0140519.240	dmel-5.43-3R(+)::26076650-26078552	dmel-5.43-3R	26076650	26078552	+	dmel-5.43-3R::26057407-26089468	FlyFos016889	42754	26057407	26089468	FlyFos016889[10998-12060]	dmel-5.43-3R(+)[26078472-26078471]		grows	[NGS] validated	fully_covered;no mut;flipped	fully_covered	no mut	flipped	34	232	176	0	0	0							05512796956240418_D07	58519847_14_D_7_10998_12060_dmel-5.43-3R_26078472_26078471
05512796956240418_D08	https://transgeneome.mpi-cbg.de/transgeneomics/public/clone.html?wellId=59013358	FlyFos016906(CG6945[23771]::S000169_fly_pretag)::2XTY1-SGFP-V5-preTEV-BLRP-3XFLAGdFRT	FBgn0036476	CG6945		dmel-5.43-3L(-)::15083923-15087819	dmel-5.43-3L	15083923	15087819	-	dmel-5.43-3L::15070316-15108659	FlyFos016906	49036	15070316	15108659	FlyFos016906[14142-15204]	dmel-5.43-3L(-)[15070316-15108659]		grows	[NGS] validated	fully_covered;no mut;flipped	fully_covered	no mut	flipped	36	170	239	0	0	0							05512796956240418_D08	58519847_14_D_8_14142_15204_dmel-5.43-3L_15070316_15108659
05512796956240418_D10	https://transgeneome.mpi-cbg.de/transgeneomics/public/clone.html?wellId=59013486	FlyFos016926(CG6750[42444]::S000169_fly_pretag)::2XTY1-SGFP-V5-preTEV-BLRP-3XFLAGdFRT	FBgn0032292	CG6750		dmel-5.43-2L(-)::10731400-10732406	dmel-5.43-2L	10731400	10732406	-	dmel-5.43-2L::10698720-10742462	FlyFos016926	54435	10698720	10742462	FlyFos016926[32815-33877]	dmel-5.43-2L(-)[10698720-10742462]		grows	[NGS] validated	fully_covered;no mut;flipped	fully_covered	no mut	flipped	28	102	151	0	0	0							05512796956240418_D10	58519847_14_D_10_32815_33877_dmel-5.43-2L_10698720_10742462
05512796956240418_D11	https://transgeneome.mpi-cbg.de/transgeneomics/public/clone.html?wellId=59013550	FlyFos016930(CG13634[24566]::S000169_fly_pretag)::2XTY1-SGFP-V5-preTEV-BLRP-3XFLAGdFRT	FBgn0039224	CG13634		dmel-5.43-3R(-)::20614072-20615858	dmel-5.43-3R	20614072	20615858	-	dmel-5.43-3R::20599139-20636925	FlyFos016930	48479	20599139	20636925	FlyFos016930[14937-15999]	dmel-5.43-3R(-)[20599139-20636925]		grows	[NGS] validated	fully_covered;no mut;flipped	fully_covered	no mut	flipped	23	83	121	0	0	0							05512796956240418_D11	58519847_14_D_11_14937_15999_dmel-5.43-3R_20599139_20636925
05512796956240418_D12	https://transgeneome.mpi-cbg.de/transgeneomics/public/clone.html?wellId=59013614	FlyFos016931(Cyp309a2[23193]::S000169_fly_pretag)::2XTY1-SGFP-V5-preTEV-BLRP-3XFLAGdFRT	FBgn0041337	Cyp309a2	Cyp309a2, 309a2, CG18559	dmel-5.43-2L(-)::2564882-2573047	dmel-5.43-2L	2564882	2573047	-	dmel-5.43-2L::2551525-2589392	FlyFos016931	48560	2551525	2589392	FlyFos016931[13564-14626]	dmel-5.43-2L(-)[2551525-2589392]		grows	[NGS] validated	fully_covered;no mut;flipped	fully_covered	no mut	flipped	15	115	11	0	0	0		->12677|T|C(0|21:21);>12682|G|T(0|20:20);>12847|G|A(0|21:21);>12920|C|T(0|27:27);>12926|G|A(0|27:27);>12968|T|G(0|30:30);>12976|T|C(0|34:34);>13041|G|A(0|31:31);>13067|A|C(1|32:33);>13270|G|T(0|39:39);>13305|G|T(0|45:45);>13330|A|G(0|46:46);>14809|A|T(0|28:28);>14816|T|G(0|26:26);>14839|T|C(0|25:25);>14960|C|T(0|33:33);>15029|C|T(0|30:30);>15039|C|T(0|29:29);>15062|A|G(0|22:22)	1	mut oustde of 100	mut_in_tag+1000		05512796956240418_D12	58519847_14_D_12_13564_14626_dmel-5.43-2L_2551525_2589392
05512796956240418_E01	https://transgeneome.mpi-cbg.de/transgeneomics/public/clone.html?wellId=59012918	FlyFos016815(CG33340[22399]::S000169_fly_pretag)::2XTY1-SGFP-V5-preTEV-BLRP-3XFLAGdFRT	FBgn0053340	CG33340	CG13612, BEST:GH24664, BcDNA:AT31672	dmel-5.43-3R(+)::20188860-20190011	dmel-5.43-3R	20188860	20190011	+	dmel-5.43-3R::20166023-20202451	FlyFos016815	47121	20166023	20202451	FlyFos016815[12770-13832]	dmel-5.43-3R(+)[20189683-20189682]		grows	[NGS] validated	fully_covered;no mut;flipped	fully_covered	no mut	flipped	23	122	112	0	0	0							05512796956240418_E01	58519847_14_E_1_12770_13832_dmel-5.43-3R_20189683_20189682
05512796956240418_E03	https://transgeneome.mpi-cbg.de/transgeneomics/public/clone.html?wellId=59013046	FlyFos016835(Drep-1[32998]::S000169_fly_pretag)::2XTY1-SGFP-V5-preTEV-BLRP-3XFLAGdFRT	FBgn0024732	Drep-1	DNA fragmentation factor-related protein 1, Inhibitor of CAD, Rep1, DFF45-related protein-1, DREP-1/dICAD, ICAD, Drep1, drep1, CG8357, DREP-1, dICAD, ICAD/DREP-1, Rep1	dmel-5.43-2R(+)::7932119-7937678	dmel-5.43-2R	7932119	7937678	+	dmel-5.43-2R::7913300-7948760	FlyFos016835	46153	7913300	7948760	FlyFos016835[23369-24431]	dmel-5.43-2R(+)[7913300-7948760]		grows	[NGS] validated	fully_covered;no mut;flipped	fully_covered	no mut	flipped	24	124	140	0	0	0							05512796956240418_E03	58519847_14_E_3_23369_24431_dmel-5.43-2R_7913300_7948760
05512796956240418_E04	https://transgeneome.mpi-cbg.de/transgeneomics/public/clone.html?wellId=59013110	FlyFos016853(CG7906[23867]::S000169_fly_pretag)::2XTY1-SGFP-V5-preTEV-BLRP-3XFLAGdFRT	FBgn0036417	CG7906		dmel-5.43-3L(+)::14229824-14231372	dmel-5.43-3L	14229824	14231372	+	dmel-5.43-3L::14209707-14245459	FlyFos016853	46445	14209707	14245459	FlyFos016853[14238-15300]	dmel-5.43-3L(+)[14231223-14231222]		grows	[NGS] validated	fully_covered;no mut;flipped	fully_covered	no mut	flipped	36	239	140	0	0	0							05512796956240418_E04	58519847_14_E_4_14238_15300_dmel-5.43-3L_14231223_14231222
05512796956240418_E05	https://transgeneome.mpi-cbg.de/transgeneomics/public/clone.html?wellId=59013174	FlyFos016868(spag[31117]::S000169_fly_pretag)::2XTY1-SGFP-V5-preTEV-BLRP-3XFLAGdFRT	FBgn0015544	spag	spaghetti, CG13570, l(2)k12101	dmel-5.43-2R(+)::20046888-20049021	dmel-5.43-2R	20046888	20049021	+	dmel-5.43-2R::20027404-20063809	FlyFos016868	47098	20027404	20063809	FlyFos016868[21488-22550]	dmel-5.43-2R(+)[20027404-20063809]		grows	[NGS] validated	fully_covered;no mut;flipped	fully_covered	no mut	flipped	7	45	29	0	0	0							05512796956240418_E05	58519847_14_E_5_21488_22550_dmel-5.43-2R_20027404_20063809
05512796956240418_E06	https://transgeneome.mpi-cbg.de/transgeneomics/public/clone.html?wellId=59013238	FlyFos016886(CG10344[23674]::S000169_fly_pretag)::2XTY1-SGFP-V5-preTEV-BLRP-3XFLAGdFRT	FBgn0034729	CG10344		dmel-5.43-2R(-)::18313238-18314470	dmel-5.43-2R	18313238	18314470	-	dmel-5.43-2R::18293070-18327573	FlyFos016886	45196	18293070	18327573	FlyFos016886[14045-15107]	dmel-5.43-2R(-)[18313530-18313529]		grows	[NGS] validated	fully_covered;no mut;flipped	fully_covered	no mut	flipped	36	168	210	0	0	0							05512796956240418_E06	58519847_14_E_6_14045_15107_dmel-5.43-2R_18313530_18313529
05512796956240418_E07	https://transgeneome.mpi-cbg.de/transgeneomics/public/clone.html?wellId=59013302	FlyFos016889(CG34299[22819]::S000169_fly_pretag)::2XTY1-SGFP-V5-preTEV-BLRP-3XFLAGdFRT	FBgn0085328	CG34299		dmel-5.43-3R(+)::26075305-26076282	dmel-5.43-3R	26075305	26076282	+	dmel-5.43-3R::26057407-26089468	FlyFos016889	42754	26057407	26089468	FlyFos016889[13190-14252]	dmel-5.43-3R(+)[26076280-26076279]		grows	[NGS] validated	fully_covered;no mut;flipped	fully_covered	no mut	flipped	18	85	122	0	0	0							05512796956240418_E07	58519847_14_E_7_13190_14252_dmel-5.43-3R_26076280_26076279
05512796956240418_E08	https://transgeneome.mpi-cbg.de/transgeneomics/public/clone.html?wellId=59013366	FlyFos016906(CTPsyn[45109]::S000169_fly_pretag)::2XTY1-SGFP-V5-preTEV-BLRP-3XFLAGdFRT	FBgn0262707	CTPsyn	CTP synthase, CG6854, anon-WO0172774.92, anon-WO0172774.90	dmel-5.43-3L(+)::15091237-15106079	dmel-5.43-3L	15091237	15106079	+	dmel-5.43-3L::15070316-15108659	FlyFos016906	49036	15070316	15108659	FlyFos016906[35480-36542]	dmel-5.43-3L(+)[15070316-15108659]		grows	[NGS] validated	fully_covered;no mut;flipped	fully_covered	no mut	flipped	10	49	26	0	0	0							05512796956240418_E08	58519847_14_E_8_35480_36542_dmel-5.43-3L_15070316_15108659
05512796956240418_E09	https://transgeneome.mpi-cbg.de/transgeneomics/public/clone.html?wellId=59013430	FlyFos016920(CG14416[38906]::S000169_fly_pretag)::2XTY1-SGFP-V5-preTEV-BLRP-3XFLAGdFRT	FBgn0040352	CG14416	EG:BACR43E12.7	dmel-5.43-X(-)::2766023-2766854	dmel-5.43-X	2766023	2766854	-	dmel-5.43-X::2736750-2770791	FlyFos016920	44734	2736750	2770791	FlyFos016920[29277-30339]	dmel-5.43-X(-)[2736750-2770791]		grows	[NGS] validated	fully_covered;no mut;flipped	fully_covered	no mut	flipped	39	199	300	0	0	0							05512796956240418_E09	58519847_14_E_9_29277_30339_dmel-5.43-X_2736750_2770791
05512796956240418_E10	https://transgeneome.mpi-cbg.de/transgeneomics/public/clone.html?wellId=59013494	FlyFos016926(CG6431[39584]::S000169_fly_pretag)::2XTY1-SGFP-V5-preTEV-BLRP-3XFLAGdFRT	FBgn0032289	CG6431	chr2L_10724193_10724543.0	dmel-5.43-2L(+)::10724274-10728740	dmel-5.43-2L	10724274	10728740	+	dmel-5.43-2L::10698720-10742462	FlyFos016926	54435	10698720	10742462	FlyFos016926[29955-31017]	dmel-5.43-2L(+)[10698720-10742462]		grows	[NGS] validated	fully_covered;no mut;flipped	fully_covered	no mut	flipped	19	96	122	0	0	0							05512796956240418_E10	58519847_14_E_10_29955_31017_dmel-5.43-2L_10698720_10742462
05512796956240418_E11	https://transgeneome.mpi-cbg.de/transgeneomics/public/clone.html?wellId=59013558	FlyFos016930(Ude[34170]::S000169_fly_pretag)::2XTY1-SGFP-V5-preTEV-BLRP-3XFLAGdFRT	FBgn0039226	Ude	Uracil-DNA degrading factor, uracil-DNA-degrading factor, uracil-DNA degrading factor, CG18410, UDE	dmel-5.43-3R(-)::20623179-20625390	dmel-5.43-3R	20623179	20625390	-	dmel-5.43-3R::20599139-20636925	FlyFos016930	48479	20599139	20636925	FlyFos016930[24541-25603]	dmel-5.43-3R(-)[20599139-20636925]		grows	[NGS] validated	fully_covered;no mut;flipped	fully_covered	no mut	flipped	30	115	210	0	0	0							05512796956240418_E11	58519847_14_E_11_24541_25603_dmel-5.43-3R_20599139_20636925
05512796956240418_E12	https://transgeneome.mpi-cbg.de/transgeneomics/public/clone.html?wellId=59013622	FlyFos016935(CG14550[17086]::S000169_fly_pretag)::2XTY1-SGFP-V5-preTEV-BLRP-3XFLAGdFRT	FBgn0039405	CG14550	BcDNA:GM30016, Dromel_CG14550_FBtr0084974_mORF	dmel-5.43-3R(-)::21883069-21883945	dmel-5.43-3R	21883069	21883945	-	dmel-5.43-3R::21875616-21909872	FlyFos016935	44949	21875616	21909872	FlyFos016935[7457-8519]	dmel-5.43-3R(-)[21875616-21909872]		grows	[NGS] validated	fully_covered;no mut;flipped	fully_covered	no mut	flipped	24	115	153	0	0	0							05512796956240418_E12	58519847_14_E_12_7457_8519_dmel-5.43-3R_21875616_21909872
05512796956240418_F01	https://transgeneome.mpi-cbg.de/transgeneomics/public/clone.html?wellId=59012926	FlyFos016815(CG33339[23296]::S000169_fly_pretag)::2XTY1-SGFP-V5-preTEV-BLRP-3XFLAGdFRT	FBgn0053339	CG33339	CG13612	dmel-5.43-3R(+)::20187569-20188864	dmel-5.43-3R	20187569	20188864	+	dmel-5.43-3R::20166023-20202451	FlyFos016815	47121	20166023	20202451	FlyFos016815[13667-14729]	dmel-5.43-3R(+)[20188786-20188785]		grows	[NGS] validated	fully_covered;no mut;flipped	fully_covered	no mut	flipped	16	71	61	0	0	0							05512796956240418_F01	58519847_14_F_1_13667_14729_dmel-5.43-3R_20188786_20188785
05512796956240418_F02	https://transgeneome.mpi-cbg.de/transgeneomics/public/clone.html?wellId=59012990	FlyFos016828(CG6299[35642]::S000169_fly_pretag)::2XTY1-SGFP-V5-preTEV-BLRP-3XFLAGdFRT	FBgn0030641	CG6299		dmel-5.43-X(+)::15356745-15360845	dmel-5.43-X	15356745	15360845	+	dmel-5.43-X::15334729-15371323	FlyFos016828	47287	15334729	15371323	FlyFos016828[26013-27075]	dmel-5.43-X(+)[15334729-15371323]		grows	[NGS] validated	fully_covered;no mut;flipped	fully_covered	no mut	flipped	8	27	26	0	0	0							05512796956240418_F02	58519847_14_F_2_26013_27075_dmel-5.43-X_15334729_15371323
05512796956240418_F03	https://transgeneome.mpi-cbg.de/transgeneomics/public/clone.html?wellId=59013054	FlyFos016835(CG43191[20067]::S000169_fly_pretag)::2XTY1-SGFP-V5-preTEV-BLRP-3XFLAGdFRT	FBgn0262820	CG43191	noncoding_6153	dmel-5.43-2R(-)::7923426-7924670	dmel-5.43-2R	7923426	7924670	-	dmel-5.43-2R::7913300-7948760	FlyFos016835	46153	7913300	7948760	FlyFos016835[10438-11500]	dmel-5.43-2R(-)[7913300-7948760]		grows	[NGS] validated	fully_covered;no mut;flipped	fully_covered	no mut	flipped	28	96	141	0	0	0							05512796956240418_F03	58519847_14_F_3_10438_11500_dmel-5.43-2R_7913300_7948760
05512796956240418_F04	https://transgeneome.mpi-cbg.de/transgeneomics/public/clone.html?wellId=59013118	FlyFos016855(CG40188[25899]::S000169_fly_pretag)::2XTY1-SGFP-V5-preTEV-BLRP-3XFLAGdFRT	FBgn0058188	CG40188		dmel-5.43-U(+)::2232251-2234180	dmel-5.43-U	2232251	2234180	+	dmel-5.43-U::2211282-2250446	FlyFos016855	49857	2211282	2250446	FlyFos016855[16270-17332]	dmel-5.43-U(+)[2234178-2234177]		grows	[NGS] validated	fully_covered;no mut;flipped	fully_covered	no mut	flipped	36	180	164	0	0	0							05512796956240418_F04	58519847_14_F_4_16270_17332_dmel-5.43-U_2234178_2234177
05512796956240418_F07	https://transgeneome.mpi-cbg.de/transgeneomics/public/clone.html?wellId=59013310	FlyFos016893(amd[26011]::S000169_fly_pretag)::2XTY1-SGFP-V5-preTEV-BLRP-3XFLAGdFRT	FBgn0000075	amd	alpha methyl dopa-resistant, alpha methyl dopa, DHPAA synthase, dopa decarboxylase, transcription unit No. 1, alpha-methotrexate deficient, alpha-methyl dopa resistant, fAMD, CG10501, l(2)amd[H], X04695, AMD-r, CG17345, l(2)amd, l(2)37Bk, l(2)amd alpha-methyldopa hypersensitive	dmel-5.43-2L(+)::19110159-19114110	dmel-5.43-2L	19110159	19114110	+	dmel-5.43-2L::19091225-19130389	FlyFos016893	49857	19091225	19130389	FlyFos016893[16382-17444]	dmel-5.43-2L(+)[19114009-19114008]		grows	[NGS] validated	fully_covered;no mut;flipped	fully_covered	no mut	flipped	34	195	166	0	0	0							05512796956240418_F07	58519847_14_F_7_16382_17444_dmel-5.43-2L_19114009_19114008
05512796956240418_F08	https://transgeneome.mpi-cbg.de/transgeneomics/public/clone.html?wellId=59013374	FlyFos016907(glu[16759]::S000169_fly_pretag)::2XTY1-SGFP-V5-preTEV-BLRP-3XFLAGdFRT	FBgn0015391	glu	gluon, DmSMC4, anon-WO0118547.156, l(2)k08819, BcDNA.LD20207, gluon, Gluon, dSMC4, DmSMC4/gluon, CG11397, BcDNA:LD20207, SMC4	dmel-5.43-2L(-)::16733617-16738372	dmel-5.43-2L	16733617	16738372	-	dmel-5.43-2L::16726671-16759991	FlyFos016907	44013	16726671	16759991	FlyFos016907[7130-8192]	dmel-5.43-2L(-)[16726671-16759991]		grows	[NGS] validated	fully_covered;no mut;flipped	fully_covered	no mut	flipped	10	30	30	0	0	0							05512796956240418_F08	58519847_14_F_8_7130_8192_dmel-5.43-2L_16726671_16759991
05512796956240418_F09	https://transgeneome.mpi-cbg.de/transgeneomics/public/clone.html?wellId=59013438	FlyFos016922(PH4alphaMP[17000]::S000169_fly_pretag)::2XTY1-SGFP-V5-preTEV-BLRP-3XFLAGdFRT	FBgn0026190	PH4alphaMP	prolyl-4-hydroxylase-alpha MP, alpha subunit, prolyl-4-hydroxylase-alpha, 59D7T, CG9726, ESTS:59D7T, DM59D7T	dmel-5.43-3R(-)::26317535-26321875	dmel-5.43-3R	26317535	26321875	-	dmel-5.43-3R::26310377-26341570	FlyFos016922	41886	26310377	26341570	FlyFos016922[7371-8433]	dmel-5.43-3R(-)[26310377-26341570]		grows	[NGS] validated	fully_covered;no mut;flipped	fully_covered	no mut	flipped	41	191	151	0	0	0							05512796956240418_F09	58519847_14_F_9_7371_8433_dmel-5.43-3R_26310377_26341570
05512796956240418_F10	https://transgeneome.mpi-cbg.de/transgeneomics/public/clone.html?wellId=59013502	FlyFos016926(CG6443[41110]::S000169_fly_pretag)::2XTY1-SGFP-V5-preTEV-BLRP-3XFLAGdFRT	FBgn0032290	CG6443		dmel-5.43-2L(+)::10728975-10730302	dmel-5.43-2L	10728975	10730302	+	dmel-5.43-2L::10698720-10742462	FlyFos016926	54435	10698720	10742462	FlyFos016926[31481-32543]	dmel-5.43-2L(+)[10698720-10742462]		grows	[NGS] validated	fully_covered;no mut;flipped	fully_covered	no mut	flipped	26	118	114	0	0	0							05512796956240418_F10	58519847_14_F_10_31481_32543_dmel-5.43-2L_10698720_10742462
05512796956240418_F11	https://transgeneome.mpi-cbg.de/transgeneomics/public/clone.html?wellId=59013566	FlyFos016930(CG5805[21612]::S000169_fly_pretag)::2XTY1-SGFP-V5-preTEV-BLRP-3XFLAGdFRT	FBgn0039223	CG5805		dmel-5.43-3R(-)::20610459-20613152	dmel-5.43-3R	20610459	20613152	-	dmel-5.43-3R::20599139-20636925	FlyFos016930	48479	20599139	20636925	FlyFos016930[11983-13045]	dmel-5.43-3R(-)[20599139-20636925]		grows	[NGS] validated	fully_covered;no mut;flipped	fully_covered	no mut	flipped	20	85	75	0	0	0							05512796956240418_F11	58519847_14_F_11_11983_13045_dmel-5.43-3R_20599139_20636925
05512796956240418_F12	https://transgeneome.mpi-cbg.de/transgeneomics/public/clone.html?wellId=59013630	FlyFos016935(RpL34a[18233]::S000169_fly_pretag)::2XTY1-SGFP-V5-preTEV-BLRP-3XFLAGdFRT	FBgn0039406	RpL34a	Ribosomal protein L34a, L34, CG6090, RpL34	dmel-5.43-3R(-)::21884142-21884989	dmel-5.43-3R	21884142	21884989	-	dmel-5.43-3R::21875616-21909872	FlyFos016935	44949	21875616	21909872	FlyFos016935[8604-9666]	dmel-5.43-3R(-)[21875616-21909872]		grows	[NGS] validated	fully_covered;no mut;flipped	fully_covered	no mut	flipped	25	137	113	0	0	0							05512796956240418_F12	58519847_14_F_12_8604_9666_dmel-5.43-3R_21875616_21909872
05512796956240418_G01	https://transgeneome.mpi-cbg.de/transgeneomics/public/clone.html?wellId=59012934	FlyFos016818(CG11041[19687]::S000169_fly_pretag)::2XTY1-SGFP-V5-preTEV-BLRP-3XFLAGdFRT	FBgn0034481	CG11041		dmel-5.43-2R(+)::16033638-16034329	dmel-5.43-2R	16033638	16034329	+	dmel-5.43-2R::16017735-16044343	FlyFos016818	37301	16017735	16044343	FlyFos016818[10058-11120]	dmel-5.43-2R(+)[16034287-16034286]		grows	[NGS] validated	fully_covered;no mut;flipped	fully_covered	no mut	flipped	43	238	288	0	0	0							05512796956240418_G01	58519847_14_G_1_10058_11120_dmel-5.43-2R_16034287_16034286
05512796956240418_G04	https://transgeneome.mpi-cbg.de/transgeneomics/public/clone.html?wellId=59013126	FlyFos016857(CG40191[17156]::S000169_fly_pretag)::2XTY1-SGFP-V5-preTEV-BLRP-3XFLAGdFRT	FBgn0058191	CG40191	BEST:HL02313, BcDNA:LD12604	dmel-5.43-2RHet(+)::390776-392982	dmel-5.43-2RHet	390776	392982	+	dmel-5.43-2RHet::363213-400182	FlyFos016857	47662	363213	400182	FlyFos016857[7527-8589]	dmel-5.43-2RHet(+)[392657-392656]		grows	[NGS] validated	fully_covered;no mut;flipped	fully_covered	no mut	flipped	23	136	150	0	0	0							05512796956240418_G04	58519847_14_G_4_7527_8589_dmel-5.43-2RHet_392657_392656
05512796956240418_G05	https://transgeneome.mpi-cbg.de/transgeneomics/public/clone.html?wellId=59013190	FlyFos016881(fw[28952]::S000169_fly_pretag)::2XTY1-SGFP-V5-preTEV-BLRP-3XFLAGdFRT	FBgn0001083	fw	furrowed, wrinkled, CT3745, fw-like, CG1500, wr	dmel-5.43-X(-)::11886948-11897943	dmel-5.43-X	11886948	11897943	-	dmel-5.43-X::11873188-11906854	FlyFos016881	44359	11873188	11906854	FlyFos016881[19323-20385]	dmel-5.43-X(-)[11887533-11887532]		grows	[NGS] validated	fully_covered;no mut;flipped	fully_covered	no mut	flipped	46	211	359	0	0	0							05512796956240418_G05	58519847_14_G_5_19323_20385_dmel-5.43-X_11887533_11887532
05512796956240418_G06	https://transgeneome.mpi-cbg.de/transgeneomics/public/clone.html?wellId=59013254	FlyFos016886(mRpS29[30575]::S000169_fly_pretag)::2XTY1-SGFP-V5-preTEV-BLRP-3XFLAGdFRT	FBgn0034727	mRpS29	mitochondrial ribosomal protein S29, CG3633, anon-WO0118547.102, MRP-S29, DAP3	dmel-5.43-2R(-)::18306442-18307882	dmel-5.43-2R	18306442	18307882	-	dmel-5.43-2R::18293070-18327573	FlyFos016886	45196	18293070	18327573	FlyFos016886[20946-22008]	dmel-5.43-2R(-)[18306629-18306628]		grows	[NGS] validated	fully_covered;no mut;flipped	fully_covered	no mut	flipped	37	115	259	0	0	0							05512796956240418_G06	58519847_14_G_6_20946_22008_dmel-5.43-2R_18306629_18306628
05512796956240418_G07	https://transgeneome.mpi-cbg.de/transgeneomics/public/clone.html?wellId=59013318	FlyFos016893(CG10561[23610]::S000169_fly_pretag)::2XTY1-SGFP-V5-preTEV-BLRP-3XFLAGdFRT	FBgn0002036	CG10561	transcription unit No. 2, lethal(2)37Cs, transcription unit 37C2, ORF3, TU37C1, C2, anon-37Cc, TuC1, l(2)37Cs, anon-37Cb, cs, ORF1, anon-37Cd, ORF2, TU37C2, anon-37Cs, Cs	dmel-5.43-2L(+)::19114401-19116571	dmel-5.43-2L	19114401	19116571	+	dmel-5.43-2L::19091225-19130389	FlyFos016893	49857	19091225	19130389	FlyFos016893[13981-15043]	dmel-5.43-2L(+)[19116410-19116409]		grows	[NGS] validated	fully_covered;no mut;flipped	fully_covered	no mut	flipped	31	172	127	0	0	0							05512796956240418_G07	58519847_14_G_7_13981_15043_dmel-5.43-2L_19116410_19116409
05512796956240418_G08	https://transgeneome.mpi-cbg.de/transgeneomics/public/clone.html?wellId=59013382	FlyFos016907(CG17996[13513]::S000169_fly_pretag)::2XTY1-SGFP-V5-preTEV-BLRP-3XFLAGdFRT	FBgn0032595	CG17996	BcDNA:GM20557	dmel-5.43-2L(-)::16730458-16731039	dmel-5.43-2L	16730458	16731039	-	dmel-5.43-2L::16726671-16759991	FlyFos016907	44013	16726671	16759991	FlyFos016907[3884-4946]	dmel-5.43-2L(-)[16726671-16759991]		grows	[NGS] validated	fully_covered;no mut;flipped	fully_covered	no mut	flipped	11	69	77	0	0	0							05512796956240418_G08	58519847_14_G_8_3884_4946_dmel-5.43-2L_16726671_16759991
05512796956240418_G09	https://transgeneome.mpi-cbg.de/transgeneomics/public/clone.html?wellId=59013446	FlyFos016922(CG15539[32917]::S000169_fly_pretag)::2XTY1-SGFP-V5-preTEV-BLRP-3XFLAGdFRT	FBgn0039782	CG15539	CG15539-NE4	dmel-5.43-3R(+)::26331709-26333699	dmel-5.43-3R	26331709	26333699	+	dmel-5.43-3R::26310377-26341570	FlyFos016922	41886	26310377	26341570	FlyFos016922[23288-24350]	dmel-5.43-3R(+)[26310377-26341570]		grows	[NGS] validated	fully_covered;no mut;flipped	fully_covered	no mut	flipped	12	35	58	0	0	0							05512796956240418_G09	58519847_14_G_9_23288_24350_dmel-5.43-3R_26310377_26341570
05512796956240418_G10	https://transgeneome.mpi-cbg.de/transgeneomics/public/clone.html?wellId=59013510	FlyFos016926(CG17118[42175]::S000169_fly_pretag)::2XTY1-SGFP-V5-preTEV-BLRP-3XFLAGdFRT	FBgn0032291	CG17118		dmel-5.43-2L(+)::10730255-10731356	dmel-5.43-2L	10730255	10731356	+	dmel-5.43-2L::10698720-10742462	FlyFos016926	54435	10698720	10742462	FlyFos016926[32546-33608]	dmel-5.43-2L(+)[10698720-10742462]		grows	[NGS] validated	fully_covered;no mut;flipped	fully_covered	no mut	flipped	25	171	111	0	0	0							05512796956240418_G10	58519847_14_G_10_32546_33608_dmel-5.43-2L_10698720_10742462
05512796956240418_G12	https://transgeneome.mpi-cbg.de/transgeneomics/public/clone.html?wellId=59013638	FlyFos016935(CG14551[21051]::S000169_fly_pretag)::2XTY1-SGFP-V5-preTEV-BLRP-3XFLAGdFRT	FBgn0039408	CG14551		dmel-5.43-3R(-)::21886990-21888733	dmel-5.43-3R	21886990	21888733	-	dmel-5.43-3R::21875616-21909872	FlyFos016935	44949	21875616	21909872	FlyFos016935[11422-12484]	dmel-5.43-3R(-)[21875616-21909872]		grows	[NGS] validated	fully_covered;no mut;flipped	fully_covered	no mut	flipped	36	187	228	0	0	0							05512796956240418_G12	58519847_14_G_12_11422_12484_dmel-5.43-3R_21875616_21909872
05512796956240418_H01	https://transgeneome.mpi-cbg.de/transgeneomics/public/clone.html?wellId=59012942	FlyFos016823(Hsp23[24841]::S000169_fly_pretag)::2XTY1-SGFP-V5-preTEV-BLRP-3XFLAGdFRT	FBgn0001224	Hsp23	Heat shock protein 23, Protein 23, Hsp 23, heat-shock protein 23, Hsp-23, hsp23/22, 23, hsp 23, hsp 22K, HSP23, small hsp locus 67B, CG4463, DmHsp23, HSP23/IAP, hsp 23K, hsp23	dmel-5.43-3L(+)::9374986-9375865	dmel-5.43-3L	9374986	9375865	+	dmel-5.43-3L::9360445-9389871	FlyFos016823	40119	9360445	9389871	FlyFos016823[15212-16274]	dmel-5.43-3L(+)[9360445-9389871]		grows	[NGS] validated	fully_covered;no mut;flipped	fully_covered	no mut	flipped	28	142	100	0	0	0							05512796956240418_H01	58519847_14_H_1_15212_16274_dmel-5.43-3L_9360445_9389871
05512796956240418_H02	https://transgeneome.mpi-cbg.de/transgeneomics/public/clone.html?wellId=59013006	FlyFos016834(ea[30307]::S000169_fly_pretag)::2XTY1-SGFP-V5-preTEV-BLRP-3XFLAGdFRT	FBgn0000533	ea	easter, Easter, SP24, CG4920, c-SP24, EA	dmel-5.43-3R(+)::11154452-11156135	dmel-5.43-3R	11154452	11156135	+	dmel-5.43-3R::11135404-11172448	FlyFos016834	47737	11135404	11172448	FlyFos016834[20678-21740]	dmel-5.43-3R(+)[11135404-11172448]		grows	[NGS] validated	fully_covered;no mut;flipped	fully_covered	no mut	flipped	22	114	85	0	0	0							05512796956240418_H02	58519847_14_H_2_20678_21740_dmel-5.43-3R_11135404_11172448
05512796956240418_H03	https://transgeneome.mpi-cbg.de/transgeneomics/public/clone.html?wellId=59013070	FlyFos016841(CG10907[36572]::S000169_fly_pretag)::2XTY1-SGFP-V5-preTEV-BLRP-3XFLAGdFRT	FBgn0036207	CG10907		dmel-5.43-3L(+)::11786644-11788521	dmel-5.43-3L	11786644	11788521	+	dmel-5.43-3L::11761546-11796916	FlyFos016841	46063	11761546	11796916	FlyFos016841[26943-28005]	dmel-5.43-3L(+)[11761546-11796916]		grows	[NGS] validated	fully_covered;no mut;flipped	fully_covered	no mut	flipped	24	106	116	0	0	0							05512796956240418_H03	58519847_14_H_3_26943_28005_dmel-5.43-3L_11761546_11796916
05512796956240418_H04	https://transgeneome.mpi-cbg.de/transgeneomics/public/clone.html?wellId=59013134	FlyFos016859(CG7460[27347]::S000169_fly_pretag)::2XTY1-SGFP-V5-preTEV-BLRP-3XFLAGdFRT	FBgn0036749	CG7460		dmel-5.43-3L(+)::17733640-17735640	dmel-5.43-3L	17733640	17735640	+	dmel-5.43-3L::17717666-17750275	FlyFos016859	43302	17717666	17750275	FlyFos016859[17718-18780]	dmel-5.43-3L(+)[17717666-17750275]		grows	[NGS] validated	fully_covered;no mut;flipped	fully_covered	no mut	flipped	23	126	94	0	0	0							05512796956240418_H04	58519847_14_H_4_17718_18780_dmel-5.43-3L_17717666_17750275
05512796956240418_H05	https://transgeneome.mpi-cbg.de/transgeneomics/public/clone.html?wellId=59013198	FlyFos016881(gd[36666]::S000169_fly_pretag)::2XTY1-SGFP-V5-preTEV-BLRP-3XFLAGdFRT	FBgn0000808	gd	gastrulation-defective, gastrulation defective, Gastrulation Defective, fs(1)573, CG1505, fs(1)gd, fs(1)A573, SP186, gas, GD, fs(1)M18, fs(1)18, fs(1)190-5	dmel-5.43-X(-)::11879565-11881754	dmel-5.43-X	11879565	11881754	-	dmel-5.43-X::11873188-11906854	FlyFos016881	44359	11873188	11906854	FlyFos016881[27037-28099]	dmel-5.43-X(-)[11879819-11879818]		grows	[NGS] validated	fully_covered;no mut;flipped	fully_covered	no mut	flipped	41	231	223	0	0	0							05512796956240418_H05	58519847_14_H_5_27037_28099_dmel-5.43-X_11879819_11879818
05512796956240418_H06	https://transgeneome.mpi-cbg.de/transgeneomics/public/clone.html?wellId=59013262	FlyFos016889(CG43448[36050]::S000169_fly_pretag)::2XTY1-SGFP-V5-preTEV-BLRP-3XFLAGdFRT	FBgn0263402	CG43448		dmel-5.43-3R(-)::26062816-26063456	dmel-5.43-3R	26062816	26063456	-	dmel-5.43-3R::26057407-26089468	FlyFos016889	42754	26057407	26089468	FlyFos016889[26421-27483]	dmel-5.43-3R(-)[26063049-26063048]		grows	[NGS] validated	fully_covered;no mut;flipped	fully_covered	no mut	flipped	35	211	227	0	0	0							05512796956240418_H06	58519847_14_H_6_26421_27483_dmel-5.43-3R_26063049_26063048
05512796956240418_H07	https://transgeneome.mpi-cbg.de/transgeneomics/public/clone.html?wellId=59013326	FlyFos016893(l(2)37Cc[17598]::S000169_fly_pretag)::2XTY1-SGFP-V5-preTEV-BLRP-3XFLAGdFRT	FBgn0002031	l(2)37Cc	lethal (2) 37Cc, transcription unit No. 4, l(2)Cc, fs(2)HH32, Cc, CG10691	dmel-5.43-2L(-)::19122040-19123866	dmel-5.43-2L	19122040	19123866	-	dmel-5.43-2L::19091225-19130389	FlyFos016893	49857	19091225	19130389	FlyFos016893[7969-9031]	dmel-5.43-2L(-)[19122422-19122421]		grows	[NGS] validated	fully_covered;no mut;flipped	fully_covered	no mut	flipped	34	107	181	0	0	0							05512796956240418_H07	58519847_14_H_7_7969_9031_dmel-5.43-2L_19122422_19122421
05512796956240418_H08	https://transgeneome.mpi-cbg.de/transgeneomics/public/clone.html?wellId=59013390	FlyFos016907(CG17331[14251]::S000169_fly_pretag)::2XTY1-SGFP-V5-preTEV-BLRP-3XFLAGdFRT	FBgn0032596	CG17331	GC17331, 17331, Psmb2, Prosbeta4	dmel-5.43-2L(-)::16731221-16732129	dmel-5.43-2L	16731221	16732129	-	dmel-5.43-2L::16726671-16759991	FlyFos016907	44013	16726671	16759991	FlyFos016907[4622-5684]	dmel-5.43-2L(-)[16726671-16759991]		grows	[NGS] validated	fully_covered;no mut;flipped	fully_covered	no mut	flipped	30	129	147	0	0	0							05512796956240418_H08	58519847_14_H_8_4622_5684_dmel-5.43-2L_16726671_16759991
05512796956240418_H09	https://transgeneome.mpi-cbg.de/transgeneomics/public/clone.html?wellId=59013454	FlyFos016922(PH4alphaSG2[16927]::S000169_fly_pretag)::2XTY1-SGFP-V5-preTEV-BLRP-3XFLAGdFRT	FBgn0039779	PH4alphaSG2	prolyl-4-hydroxylase-alpha SG2, SG2, CG1546	dmel-5.43-3R(+)::26315798-26317724	dmel-5.43-3R	26315798	26317724	+	dmel-5.43-3R::26310377-26341570	FlyFos016922	41886	26310377	26341570	FlyFos016922[7298-8360]	dmel-5.43-3R(+)[26310377-26341570]		grows	[NGS] validated	fully_covered;no mut;flipped	fully_covered	no mut	flipped	26	125	87	0	0	0							05512796956240418_H09	58519847_14_H_9_7298_8360_dmel-5.43-3R_26310377_26341570
05512796956240418_H10	https://transgeneome.mpi-cbg.de/transgeneomics/public/clone.html?wellId=59013518	FlyFos016927(CG10098[18668]::S000169_fly_pretag)::2XTY1-SGFP-V5-preTEV-BLRP-3XFLAGdFRT	FBgn0037472	CG10098		dmel-5.43-3R(+)::2950272-2952225	dmel-5.43-3R	2950272	2952225	+	dmel-5.43-3R::2921153-2960902	FlyFos016927	50442	2921153	2960902	FlyFos016927[9039-10101]	dmel-5.43-3R(+)[2951865-2951864]		grows	[NGS] validated	fully_covered;no mut;flipped	fully_covered	no mut	flipped	25	120	134	0	0	0							05512796956240418_H10	58519847_14_H_10_9039_10101_dmel-5.43-3R_2951865_2951864
05512796956240418_H11	https://transgeneome.mpi-cbg.de/transgeneomics/public/clone.html?wellId=59013582	FlyFos016931(p16-ARC[38989]::S000169_fly_pretag)::2XTY1-SGFP-V5-preTEV-BLRP-3XFLAGdFRT	FBgn0031437	p16-ARC	p16-ARC, p16, P16-ARC, CG9881, Arpc5	dmel-5.43-2L(+)::2580291-2581114	dmel-5.43-2L	2580291	2581114	+	dmel-5.43-2L::2551525-2589392	FlyFos016931	48560	2551525	2589392	FlyFos016931[29360-30422]	dmel-5.43-2L(+)[2551525-2589392]		grows	[NGS] validated	fully_covered;no mut;flipped	fully_covered	no mut	flipped	36	215	183	0	0	0		->28453|A|G(0|47:47);>28540|G|T(0|66:66);>28550|G|A(0|68:68);>28592|G|C(0|62:62);>28648|C|A(0|61:61);>28738|G|C(0|38:38);>28755|T|G(0|41:41);>28760|C|G(0|39:39);>28772|T|A(0|39:39);>28925|T|C(0|31:31);>29090|C|T(0|45:45);>29096|A|T(0|48:48);>29149|G|T(0|58:58);>29218|C|T(0|59:59)	1	mut oustde of 100	mut_in_tag+1000		05512796956240418_H11	58519847_14_H_11_29360_30422_dmel-5.43-2L_2551525_2589392
05512796956240418_H12	https://transgeneome.mpi-cbg.de/transgeneomics/public/clone.html?wellId=59013646	FlyFos016935(Sld5[15426]::S000169_fly_pretag)::2XTY1-SGFP-V5-preTEV-BLRP-3XFLAGdFRT	FBgn0039403	Sld5	Sld5, CG14549, anon-WO0172774.61	dmel-5.43-3R(-)::21881368-21882213	dmel-5.43-3R	21881368	21882213	-	dmel-5.43-3R::21875616-21909872	FlyFos016935	44949	21875616	21909872	FlyFos016935[5797-6859]	dmel-5.43-3R(-)[21875616-21909872]		grows	[NGS] validated	fully_covered;no mut;flipped	fully_covered	no mut	flipped	32	117	139	0	0	0							05512796956240418_H12	58519847_14_H_12_5797_6859_dmel-5.43-3R_21875616_21909872
0864533050210965_A02	https://transgeneome.mpi-cbg.de/transgeneomics/public/clone.html?wellId=59022843	FlyFos018849(Gr22d[20663]::S000169_fly_pretag)::2XTY1-SGFP-V5-preTEV-BLRP-3XFLAGdFRT	FBgn0045498	Gr22d	Gustatory receptor 22d, Gustatory receptor 2940.2, Gr2940.2, Gr22dP, CR31930	dmel-5.43-2L(-)::1789141-1790361	dmel-5.43-2L	1789141	1790361	-	dmel-5.43-2L::1778111-1810792	FlyFos018849	43374	1778111	1810792	FlyFos018849[11034-12096]	dmel-5.43-2L(-)[1778111-1810792]		grows	[NGS] validated	fully_covered;no mut;flipped	fully_covered	no mut	flipped	36	148	228	0	0	0							0864533050210965_A02	58519847_27_A_2_11034_12096_dmel-5.43-2L_1778111_1810792
0864533050210965_A03	https://transgeneome.mpi-cbg.de/transgeneomics/public/clone.html?wellId=59022907	FlyFos018866(sunz[40583]::S000169_fly_pretag)::2XTY1-SGFP-V5-preTEV-BLRP-3XFLAGdFRT	FBgn0037462	sunz	sungrazer, CG15179, BcDNA:AT31060	dmel-5.43-3R(+)::2455892-2456907	dmel-5.43-3R	2455892	2456907	+	dmel-5.43-3R::2425787-2462909	FlyFos018866	47815	2425787	2462909	FlyFos018866[30954-32016]	dmel-5.43-3R(+)[2425787-2462909]		grows	[NGS] validated	fully_covered;no mut;flipped	fully_covered	no mut	flipped	11	50	60	0	0	0							0864533050210965_A03	58519847_27_A_3_30954_32016_dmel-5.43-3R_2425787_2462909
0864533050210965_A04	https://transgeneome.mpi-cbg.de/transgeneomics/public/clone.html?wellId=59022971	FlyFos018869(CG18810[26882]::S000169_fly_pretag)::2XTY1-SGFP-V5-preTEV-BLRP-3XFLAGdFRT	FBgn0042133	CG18810		dmel-5.43-2L(+)::20649022-20650079	dmel-5.43-2L	20649022	20650079	+	dmel-5.43-2L::20635013-20667188	FlyFos018869	42868	20635013	20667188	FlyFos018869[17253-18315]	dmel-5.43-2L(+)[20649937-20649936]		grows	[NGS] validated	fully_covered;no mut;flipped	fully_covered	no mut	flipped	34	217	154	0	0	0							0864533050210965_A04	58519847_27_A_4_17253_18315_dmel-5.43-2L_20649937_20649936
0864533050210965_A08	https://transgeneome.mpi-cbg.de/transgeneomics/public/clone.html?wellId=59023227	FlyFos018925(CG33127[21631]::S000169_fly_pretag)::2XTY1-SGFP-V5-preTEV-BLRP-3XFLAGdFRT	FBgn0053127	CG33127		dmel-5.43-2L(+)::322101-323091	dmel-5.43-2L	322101	323091	+	dmel-5.43-2L::293335-334983	FlyFos018925	52341	293335	334983	FlyFos018925[12002-13064]	dmel-5.43-2L(+)[322983-322982]		grows	[NGS] validated	fully_covered;no mut;flipped	fully_covered	no mut	flipped	21	142	136	0	0	0							0864533050210965_A08	58519847_27_A_8_12002_13064_dmel-5.43-2L_322983_322982
0864533050210965_A11	https://transgeneome.mpi-cbg.de/transgeneomics/public/clone.html?wellId=59023419	FlyFos018952(qvr[28210]::S000169_fly_pretag)::2XTY1-SGFP-V5-preTEV-BLRP-3XFLAGdFRT	FBgn0260499	qvr	quiver, SLEEPLESS, sleepless, CG33472, sss, BcDNA:GH06755, anon-WO02059370.1, CG33472, CG30032	dmel-5.43-2R(+)::7330031-7339109	dmel-5.43-2R	7330031	7339109	+	dmel-5.43-2R::7316673-7352086	FlyFos018952	46106	7316673	7352086	FlyFos018952[18581-19643]	dmel-5.43-2R(+)[7316673-7352086]		grows	[NGS] validated	fully_covered;no mut;flipped	fully_covered	no mut	flipped	44	270	286	0	0	0							0864533050210965_A11	58519847_27_A_11_18581_19643_dmel-5.43-2R_7316673_7352086
0864533050210965_B01	https://transgeneome.mpi-cbg.de/transgeneomics/public/clone.html?wellId=59022787	FlyFos018837(CG15465[18142]::S000169_fly_pretag)::2XTY1-SGFP-V5-preTEV-BLRP-3XFLAGdFRT	FBgn0029746	CG15465		dmel-5.43-X(+)::5059364-5070541	dmel-5.43-X	5059364	5070541	+	dmel-5.43-X::5040532-5079050	FlyFos018837	49211	5040532	5079050	FlyFos018837[8513-9575]	dmel-5.43-X(+)[5070539-5070538]		grows	[NGS] validated	fully_covered;no mut;flipped	fully_covered	no mut	flipped	7	37	41	0	0	0							0864533050210965_B01	58519847_27_B_1_8513_9575_dmel-5.43-X_5070539_5070538
0864533050210965_B04	https://transgeneome.mpi-cbg.de/transgeneomics/public/clone.html?wellId=59022979	FlyFos018869(CG2608[29959]::S000169_fly_pretag)::2XTY1-SGFP-V5-preTEV-BLRP-3XFLAGdFRT	FBgn0032870	CG2608	38D.26	dmel-5.43-2L(+)::20645826-20647381	dmel-5.43-2L	20645826	20647381	+	dmel-5.43-2L::20635013-20667188	FlyFos018869	42868	20635013	20667188	FlyFos018869[20330-21392]	dmel-5.43-2L(+)[20646860-20646859]		grows	[NGS] validated	fully_covered;no mut;flipped	fully_covered	no mut	flipped	38	224	172	0	0	0							0864533050210965_B04	58519847_27_B_4_20330_21392_dmel-5.43-2L_20646860_20646859
0864533050210965_B05	https://transgeneome.mpi-cbg.de/transgeneomics/public/clone.html?wellId=59023043	FlyFos018884(CG6364[17619]::S000169_fly_pretag)::2XTY1-SGFP-V5-preTEV-BLRP-3XFLAGdFRT	FBgn0263398	CG6364	CR42873	dmel-5.43-3R(+)::20115897-20119093	dmel-5.43-3R	20115897	20119093	+	dmel-5.43-3R::20093548-20125332	FlyFos018884	42477	20093548	20125332	FlyFos018884[7990-9052]	dmel-5.43-3R(+)[20117344-20117343]		grows	[NGS] validated	fully_covered;no mut;flipped	fully_covered	no mut	flipped	9	43	37	0	0	0							0864533050210965_B05	58519847_27_B_5_7990_9052_dmel-5.43-3R_20117344_20117343
0864533050210965_B06	https://transgeneome.mpi-cbg.de/transgeneomics/public/clone.html?wellId=59023107	FlyFos018902(CG12643[24953]::S000169_fly_pretag)::2XTY1-SGFP-V5-preTEV-BLRP-3XFLAGdFRT	FBgn0040942	CG12643		dmel-5.43-X(-)::10158257-10159290	dmel-5.43-X	10158257	10159290	-	dmel-5.43-X::10143554-10182229	FlyFos018902	49368	10143554	10182229	FlyFos018902[15324-16386]	dmel-5.43-X(-)[10143554-10182229]		grows	[NGS] validated	fully_covered;no mut;flipped	fully_covered	no mut	flipped	34	158	194	0	0	0							0864533050210965_B06	58519847_27_B_6_15324_16386_dmel-5.43-X_10143554_10182229
0864533050210965_B07	https://transgeneome.mpi-cbg.de/transgeneomics/public/clone.html?wellId=59023171	FlyFos018919(CG8931[16878]::S000169_fly_pretag)::2XTY1-SGFP-V5-preTEV-BLRP-3XFLAGdFRT	FBgn0030717	CG8931		dmel-5.43-X(+)::15877807-15879438	dmel-5.43-X	15877807	15879438	+	dmel-5.43-X::15845516-15886643	FlyFos018919	51820	15845516	15886643	FlyFos018919[7249-8311]	dmel-5.43-X(+)[15879396-15879395]		grows	[NGS] validated	fully_covered;no mut;flipped	fully_covered	no mut	flipped	28	141	151	0	0	0							0864533050210965_B07	58519847_27_B_7_7249_8311_dmel-5.43-X_15879396_15879395
0864533050210965_B08	https://transgeneome.mpi-cbg.de/transgeneomics/public/clone.html?wellId=59023235	FlyFos018926(MrgBP[17810]::S000169_fly_pretag)::2XTY1-SGFP-V5-preTEV-BLRP-3XFLAGdFRT	FBgn0033341	MrgBP	MrgBP, dMrgBP, dMrgB, CG13746	dmel-5.43-2R(-)::4788071-4788877	dmel-5.43-2R	4788071	4788877	-	dmel-5.43-2R::4779978-4811985	FlyFos018926	42700	4779978	4811985	FlyFos018926[8181-9243]	dmel-5.43-2R(-)[4779978-4811985]		grows	[NGS] validated	fully_covered;no mut;flipped	fully_covered	no mut	flipped	18	65	83	0	0	0							0864533050210965_B08	58519847_27_B_8_8181_9243_dmel-5.43-2R_4779978_4811985
0864533050210965_B09	https://transgeneome.mpi-cbg.de/transgeneomics/public/clone.html?wellId=59023299	FlyFos018934(CG15747[20587]::S000169_fly_pretag)::2XTY1-SGFP-V5-preTEV-BLRP-3XFLAGdFRT	FBgn0030474	CG15747		dmel-5.43-X(+)::13232387-13235052	dmel-5.43-X	13232387	13235052	+	dmel-5.43-X::13209379-13244591	FlyFos018934	45905	13209379	13244591	FlyFos018934[10958-12020]	dmel-5.43-X(+)[13233635-13233634]		grows	[NGS] validated	fully_covered;no mut;flipped	fully_covered	no mut	flipped	32	178	122	0	0	0							0864533050210965_B09	58519847_27_B_9_10958_12020_dmel-5.43-X_13233635_13233634
0864533050210965_B10	https://transgeneome.mpi-cbg.de/transgeneomics/public/clone.html?wellId=59023363	FlyFos018944(spn-F[20492]::S000169_fly_pretag)::2XTY1-SGFP-V5-preTEV-BLRP-3XFLAGdFRT	FBgn0086362	spn-F	spn-F, Spindle-F, spindle F, CG12114, spindle-F, lethal (3) S113003b, l(3)S113003b, Spn-F, CG12114, 1130/03	dmel-5.43-3R(+)::27080864-27082388	dmel-5.43-3R	27080864	27082388	+	dmel-5.43-3R::27057150-27092986	FlyFos018944	46529	27057150	27092986	FlyFos018944[10863-11925]	dmel-5.43-3R(+)[27082125-27082124]		grows	[NGS] validated	fully_covered;no mut;flipped	fully_covered	no mut	flipped	36	208	164	0	0	0							0864533050210965_B10	58519847_27_B_10_10863_11925_dmel-5.43-3R_27082125_27082124
0864533050210965_B11	https://transgeneome.mpi-cbg.de/transgeneomics/public/clone.html?wellId=59023427	FlyFos018953(CG15024[31183]::S000169_fly_pretag)::2XTY1-SGFP-V5-preTEV-BLRP-3XFLAGdFRT	FBgn0040699	CG15024		dmel-5.43-3L(-)::4463048-4463723	dmel-5.43-3L	4463048	4463723	-	dmel-5.43-3L::4447913-4484603	FlyFos018953	47383	4447913	4484603	FlyFos018953[21554-22616]	dmel-5.43-3L(-)[4463051-4463050]		grows	[NGS] validated	fully_covered;no mut;flipped	fully_covered	no mut	flipped	31	162	164	0	0	0							0864533050210965_B11	58519847_27_B_11_21554_22616_dmel-5.43-3L_4463051_4463050
0864533050210965_B12	https://transgeneome.mpi-cbg.de/transgeneomics/public/clone.html?wellId=59023491	FlyFos018962(Sb[37473]::S000169_fly_pretag)::2XTY1-SGFP-V5-preTEV-BLRP-3XFLAGdFRT	FBgn0003319	Sb	Stubble, stubbloid, Stubble-stubbloid, CG4316, SP56, Sb-sbd, st-sb, sbd, c-SP56	dmel-5.43-3R(+)::11954451-11971006	dmel-5.43-3R	11954451	11971006	+	dmel-5.43-3R::11942639-11977404	FlyFos018962	45458	11942639	11977404	FlyFos018962[27844-28906]	dmel-5.43-3R(+)[11942639-11977404]		grows	[NGS] validated	fully_covered;no mut;flipped	fully_covered	no mut	flipped	16	111	72	0	0	0							0864533050210965_B12	58519847_27_B_12_27844_28906_dmel-5.43-3R_11942639_11977404
0864533050210965_C02	https://transgeneome.mpi-cbg.de/transgeneomics/public/clone.html?wellId=59022859	FlyFos018860(CG8675[35290]::S000169_fly_pretag)::2XTY1-SGFP-V5-preTEV-BLRP-3XFLAGdFRT	FBgn0030834	CG8675		dmel-5.43-X(-)::17142405-17143575	dmel-5.43-X	17142405	17143575	-	dmel-5.43-X::17135681-17168293	FlyFos018860	43305	17135681	17168293	FlyFos018860[25661-26723]	dmel-5.43-X(-)[17142634-17142633]		grows	[NGS] validated	fully_covered;no mut;flipped	fully_covered	no mut	flipped	39	243	216	0	0	0							0864533050210965_C02	58519847_27_C_2_25661_26723_dmel-5.43-X_17142634_17142633
0864533050210965_C05	https://transgeneome.mpi-cbg.de/transgeneomics/public/clone.html?wellId=59023051	FlyFos018884(Orct2[34110]::S000169_fly_pretag)::2XTY1-SGFP-V5-preTEV-BLRP-3XFLAGdFRT	FBgn0086365	Orct2	Organic cation transporter 2, EP1072, calderon, Organic cation transporter 2, orct2, EP1072, cald, EP(3)1072, CG13610	dmel-5.43-3R(+)::20098753-20101013	dmel-5.43-3R	20098753	20101013	+	dmel-5.43-3R::20093548-20125332	FlyFos018884	42477	20093548	20125332	FlyFos018884[24481-25543]	dmel-5.43-3R(+)[20100853-20100852]		grows	[NGS] validated	fully_covered;no mut;flipped	fully_covered	no mut	flipped	6	23	30	0	0	0							0864533050210965_C05	58519847_27_C_5_24481_25543_dmel-5.43-3R_20100853_20100852
0864533050210965_C06	https://transgeneome.mpi-cbg.de/transgeneomics/public/clone.html?wellId=59023115	FlyFos018904(Teh3[25008]::S000169_fly_pretag)::2XTY1-SGFP-V5-preTEV-BLRP-3XFLAGdFRT	FBgn0040697	Teh3	tipE homolog 3, TEH3, CG18676	dmel-5.43-3L(-)::4182645-4184663	dmel-5.43-3L	4182645	4184663	-	dmel-5.43-3L::4167942-4210396	FlyFos018904	53147	4167942	4210396	FlyFos018904[15379-16441]	dmel-5.43-3L(-)[4167942-4210396]		grows	[NGS] validated	fully_covered;no mut;flipped	fully_covered	no mut	flipped	30	146	136	0	0	0							0864533050210965_C06	58519847_27_C_6_15379_16441_dmel-5.43-3L_4167942_4210396
0864533050210965_C09	https://transgeneome.mpi-cbg.de/transgeneomics/public/clone.html?wellId=59023307	FlyFos018934(RpS15Aa[24201]::S000169_fly_pretag)::2XTY1-SGFP-V5-preTEV-BLRP-3XFLAGdFRT	FBgn0010198	RpS15Aa	Ribosomal protein S15Aa, Ribosomal protein S15A, S15, S15Aa, RpS15A, Rp S15 Aa, anon-EST:Posey44, RpS15a, CG2033	dmel-5.43-X(-)::13229806-13231687	dmel-5.43-X	13229806	13231687	-	dmel-5.43-X::13209379-13244591	FlyFos018934	45905	13209379	13244591	FlyFos018934[14572-15634]	dmel-5.43-X(-)[13230021-13230020]		grows	[NGS] validated	fully_covered;no mut;flipped	fully_covered	no mut	flipped	51	273	333	0	0	0							0864533050210965_C09	58519847_27_C_9_14572_15634_dmel-5.43-X_13230021_13230020
0864533050210965_C11	https://transgeneome.mpi-cbg.de/transgeneomics/public/clone.html?wellId=59023435	FlyFos018953(CG32249[23440]::S000169_fly_pretag)::2XTY1-SGFP-V5-preTEV-BLRP-3XFLAGdFRT	FBgn0052249	CG32249		dmel-5.43-3L(+)::4470001-4471012	dmel-5.43-3L	4470001	4471012	+	dmel-5.43-3L::4447913-4484603	FlyFos018953	47383	4447913	4484603	FlyFos018953[13811-14873]	dmel-5.43-3L(+)[4470794-4470793]		grows	[NGS] validated	fully_covered;no mut;flipped	fully_covered	no mut	flipped	9	43	65	0	0	0							0864533050210965_C11	58519847_27_C_11_13811_14873_dmel-5.43-3L_4470794_4470793
0864533050210965_C12	https://transgeneome.mpi-cbg.de/transgeneomics/public/clone.html?wellId=59023499	FlyFos018966(CG32945[25517]::S000169_fly_pretag)::2XTY1-SGFP-V5-preTEV-BLRP-3XFLAGdFRT	FBgn0052945	CG32945		dmel-5.43-3R(-)::403661-404366	dmel-5.43-3R	403661	404366	-	dmel-5.43-3R::387931-429925	FlyFos018966	52687	387931	429925	FlyFos018966[15888-16950]	dmel-5.43-3R(-)[387931-429925]		grows	[NGS] validated	fully_covered;no mut;flipped	fully_covered	no mut	flipped	25	120	158	0	0	0							0864533050210965_C12	58519847_27_C_12_15888_16950_dmel-5.43-3R_387931_429925
0864533050210965_D02	https://transgeneome.mpi-cbg.de/transgeneomics/public/clone.html?wellId=59022867	FlyFos018860(CG42854[37519]::S000169_fly_pretag)::2XTY1-SGFP-V5-preTEV-BLRP-3XFLAGdFRT	FBgn0262101	CG42854		dmel-5.43-X(-)::17140025-17141049	dmel-5.43-X	17140025	17141049	-	dmel-5.43-X::17135681-17168293	FlyFos018860	43305	17135681	17168293	FlyFos018860[27890-28952]	dmel-5.43-X(-)[17140405-17140404]		grows	[NGS] validated	fully_covered;no mut;flipped	fully_covered	no mut	flipped	32	141	176	0	0	0							0864533050210965_D02	58519847_27_D_2_27890_28952_dmel-5.43-X_17140405_17140404
0864533050210965_D03	https://transgeneome.mpi-cbg.de/transgeneomics/public/clone.html?wellId=59022931	FlyFos018867(CG13125[21807]::S000169_fly_pretag)::2XTY1-SGFP-V5-preTEV-BLRP-3XFLAGdFRT	FBgn0032163	CG13125	mel CG13125, CT32363	dmel-5.43-2L(-)::9922737-9924860	dmel-5.43-2L	9922737	9924860	-	dmel-5.43-2L::9910620-9946424	FlyFos018867	46497	9910620	9946424	FlyFos018867[12178-13240]	dmel-5.43-2L(-)[9910620-9946424]		grows	[NGS] validated	fully_covered;no mut;flipped	fully_covered	no mut	flipped	39	147	184	0	0	0							0864533050210965_D03	58519847_27_D_3_12178_13240_dmel-5.43-2L_9910620_9946424
0864533050210965_D04	https://transgeneome.mpi-cbg.de/transgeneomics/public/clone.html?wellId=59022995	FlyFos018869(CG2614[17743]::S000169_fly_pretag)::2XTY1-SGFP-V5-preTEV-BLRP-3XFLAGdFRT	FBgn0032873	CG2614	38D.29	dmel-5.43-2L(+)::20656428-20659218	dmel-5.43-2L	20656428	20659218	+	dmel-5.43-2L::20635013-20667188	FlyFos018869	42868	20635013	20667188	FlyFos018869[8114-9176]	dmel-5.43-2L(+)[20659076-20659075]		grows	[NGS] validated	fully_covered;no mut;flipped	fully_covered	no mut	flipped	22	111	95	0	0	0							0864533050210965_D04	58519847_27_D_4_8114_9176_dmel-5.43-2L_20659076_20659075
0864533050210965_D05	https://transgeneome.mpi-cbg.de/transgeneomics/public/clone.html?wellId=59023059	FlyFos018884(Orct[30652]::S000169_fly_pretag)::2XTY1-SGFP-V5-preTEV-BLRP-3XFLAGdFRT	FBgn0019952	Orct	Organic cation transporter, CG6331	dmel-5.43-3R(+)::20101982-20104515	dmel-5.43-3R	20101982	20104515	+	dmel-5.43-3R::20093548-20125332	FlyFos018884	42477	20093548	20125332	FlyFos018884[21023-22085]	dmel-5.43-3R(+)[20104311-20104310]		grows	[NGS] validated	fully_covered;no mut;flipped	fully_covered	no mut	flipped	44	242	174	0	0	0							0864533050210965_D05	58519847_27_D_5_21023_22085_dmel-5.43-3R_20104311_20104310
0864533050210965_D06	https://transgeneome.mpi-cbg.de/transgeneomics/public/clone.html?wellId=59023123	FlyFos018904(VhaM9.7-c[28205]::S000169_fly_pretag)::2XTY1-SGFP-V5-preTEV-BLRP-3XFLAGdFRT	FBgn0028664	VhaM9.7-c	Vacuolar H[+] ATPase subunit M9.7-c, VhaM9.7-1, CG11589, V-ATPase, vhaM9.7-1, vhaM9.7-3, vhaM9.2-1, VhaM9.7-1	dmel-5.43-3L(-)::4186018-4186816	dmel-5.43-3L	4186018	4186816	-	dmel-5.43-3L::4167942-4210396	FlyFos018904	53147	4167942	4210396	FlyFos018904[18576-19638]	dmel-5.43-3L(-)[4167942-4210396]		grows	[NGS] validated	fully_covered;no mut;flipped	fully_covered	no mut	flipped	32	156	180	0	0	0							0864533050210965_D06	58519847_27_D_6_18576_19638_dmel-5.43-3L_4167942_4210396
0864533050210965_D09	https://transgeneome.mpi-cbg.de/transgeneomics/public/clone.html?wellId=59023315	FlyFos018937(Jon99Ciii[17430]::S000169_fly_pretag)::2XTY1-SGFP-V5-preTEV-BLRP-3XFLAGdFRT	FBgn0003357	Jon99Ciii	Jonah 99Ciii, Serine protease 2, Jonah 99C Alpha, Serine protease 5, Jonah 99C Beta, Jon99C, Jon99Calphaii, Ser5, Ser2, JonC, Jon99Calpha, Jon99C2, Jon99C1, Jon99Cbeta, CG15519, Jon99Cbetaiii, SER2, Jon99B, SP143, 99Calpha, CG31362, Ser99Db	dmel-5.43-3R(+)::25747931-25748823	dmel-5.43-3R	25747931	25748823	+	dmel-5.43-3R::25720801-25756558	FlyFos018937	46450	25720801	25756558	FlyFos018937[7801-8863]	dmel-5.43-3R(+)[25748759-25748758]		grows	[NGS] validated	fully_covered;no mut;flipped	fully_covered	no mut	flipped	8	23	35	0	0	0							0864533050210965_D09	58519847_27_D_9_7801_8863_dmel-5.43-3R_25748759_25748758
0864533050210965_D11	https://transgeneome.mpi-cbg.de/transgeneomics/public/clone.html?wellId=59023443	FlyFos018953(CG32248[21852]::S000169_fly_pretag)::2XTY1-SGFP-V5-preTEV-BLRP-3XFLAGdFRT	FBgn0052248	CG32248		dmel-5.43-3L(+)::4471758-4472384	dmel-5.43-3L	4471758	4472384	+	dmel-5.43-3L::4447913-4484603	FlyFos018953	47383	4447913	4484603	FlyFos018953[12223-13285]	dmel-5.43-3L(+)[4472382-4472381]		grows	[NGS] validated	fully_covered;no mut;flipped	fully_covered	no mut	flipped	35	202	182	0	0	0							0864533050210965_D11	58519847_27_D_11_12223_13285_dmel-5.43-3L_4472382_4472381
0864533050210965_D12	https://transgeneome.mpi-cbg.de/transgeneomics/public/clone.html?wellId=59023507	FlyFos018969(CG5953[38658]::S000169_fly_pretag)::2XTY1-SGFP-V5-preTEV-BLRP-3XFLAGdFRT	FBgn0032587	CG5953		dmel-5.43-2L(-)::16509120-16532877	dmel-5.43-2L	16509120	16532877	-	dmel-5.43-2L::16503426-16539166	FlyFos018969	46433	16503426	16539166	FlyFos018969[29029-30091]	dmel-5.43-2L(-)[16510139-16510138]		grows	[NGS] validated	fully_covered;no mut;flipped	fully_covered	no mut	flipped	33	178	134	0	0	0							0864533050210965_D12	58519847_27_D_12_29029_30091_dmel-5.43-2L_16510139_16510138
0864533050210965_E03	https://transgeneome.mpi-cbg.de/transgeneomics/public/clone.html?wellId=59022939	FlyFos018867(CG4619[39744]::S000169_fly_pretag)::2XTY1-SGFP-V5-preTEV-BLRP-3XFLAGdFRT	FBgn0032166	CG4619	CG31879	dmel-5.43-2L(+)::9938865-9941099	dmel-5.43-2L	9938865	9941099	+	dmel-5.43-2L::9910620-9946424	FlyFos018867	46497	9910620	9946424	FlyFos018867[30115-31177]	dmel-5.43-2L(+)[9910620-9946424]		grows	[NGS] validated	fully_covered;no mut;flipped	fully_covered	no mut	flipped	7	32	23	0	0	0							0864533050210965_E03	58519847_27_E_3_30115_31177_dmel-5.43-2L_9910620_9946424
0864533050210965_E04	https://transgeneome.mpi-cbg.de/transgeneomics/public/clone.html?wellId=59023003	FlyFos018869(CG17470[34359]::S000169_fly_pretag)::2XTY1-SGFP-V5-preTEV-BLRP-3XFLAGdFRT	FBgn0032869	CG17470	anon-WO0153538.51, anon-WO0140519.68, 38D.25	dmel-5.43-2L(-)::20642306-20643244	dmel-5.43-2L	20642306	20643244	-	dmel-5.43-2L::20635013-20667188	FlyFos018869	42868	20635013	20667188	FlyFos018869[24730-25792]	dmel-5.43-2L(-)[20642460-20642459]		grows	[NGS] validated	fully_covered;no mut;flipped	fully_covered	no mut	flipped	42	244	227	0	0	0							0864533050210965_E04	58519847_27_E_4_24730_25792_dmel-5.43-2L_20642460_20642459
0864533050210965_E05	https://transgeneome.mpi-cbg.de/transgeneomics/public/clone.html?wellId=59023067	FlyFos018888(CG3610[25540]::S000169_fly_pretag)::2XTY1-SGFP-V5-preTEV-BLRP-3XFLAGdFRT	FBgn0038266	CG3610		dmel-5.43-3R(+)::10670765-10672459	dmel-5.43-3R	10670765	10672459	+	dmel-5.43-3R::10656483-10690228	FlyFos018888	44438	10656483	10690228	FlyFos018888[15911-16973]	dmel-5.43-3R(+)[10656483-10690228]		grows	[NGS] validated	fully_covered;no mut;flipped	fully_covered	no mut	flipped	17	98	96	0	0	0							0864533050210965_E05	58519847_27_E_5_15911_16973_dmel-5.43-3R_10656483_10690228
0864533050210965_E06	https://transgeneome.mpi-cbg.de/transgeneomics/public/clone.html?wellId=59023131	FlyFos018904(Teh2[21233]::S000169_fly_pretag)::2XTY1-SGFP-V5-preTEV-BLRP-3XFLAGdFRT	FBgn0035505	Teh2	tipE homolog 2, TEH2, CG15004	dmel-5.43-3L(-)::4179151-4188023	dmel-5.43-3L	4179151	4188023	-	dmel-5.43-3L::4167942-4210396	FlyFos018904	53147	4167942	4210396	FlyFos018904[11604-12666]	dmel-5.43-3L(-)[4167942-4210396]		grows	[NGS] validated	fully_covered;no mut;flipped	fully_covered	no mut	flipped	32	172	186	0	0	0							0864533050210965_E06	58519847_27_E_6_11604_12666_dmel-5.43-3L_4167942_4210396
0864533050210965_E07	https://transgeneome.mpi-cbg.de/transgeneomics/public/clone.html?wellId=59023195	FlyFos018920(CG4793[16466]::S000169_fly_pretag)::2XTY1-SGFP-V5-preTEV-BLRP-3XFLAGdFRT	FBgn0028514	CG4793	BG:DS07486.3, SPH208	dmel-5.43-2L(+)::15923395-15926203	dmel-5.43-2L	15923395	15926203	+	dmel-5.43-2L::15894972-15933036	FlyFos018920	48757	15894972	15933036	FlyFos018920[6837-7899]	dmel-5.43-2L(+)[15926201-15926200]		grows	[NGS] validated	fully_covered;no mut;flipped	fully_covered	no mut	flipped	35	185	151	0	0	0							0864533050210965_E07	58519847_27_E_7_6837_7899_dmel-5.43-2L_15926201_15926200
0864533050210965_E08	https://transgeneome.mpi-cbg.de/transgeneomics/public/clone.html?wellId=59023259	FlyFos018927(CG2577[22250]::S000169_fly_pretag)::2XTY1-SGFP-V5-preTEV-BLRP-3XFLAGdFRT	FBgn0030384	CG2577	CKIa-like	dmel-5.43-X(+)::12267244-12268484	dmel-5.43-X	12267244	12268484	+	dmel-5.43-X::12240057-12280929	FlyFos018927	51565	12240057	12280929	FlyFos018927[12621-13683]	dmel-5.43-X(+)[12268310-12268309]		grows	[NGS] validated	fully_covered;no mut;flipped	fully_covered	no mut	flipped	32	222	218	0	0	0							0864533050210965_E08	58519847_27_E_8_12621_13683_dmel-5.43-X_12268310_12268309
0864533050210965_E09	https://transgeneome.mpi-cbg.de/transgeneomics/public/clone.html?wellId=59023323	FlyFos018937(trp[25868]::S000169_fly_pretag)::2XTY1-SGFP-V5-preTEV-BLRP-3XFLAGdFRT	FBgn0003861	trp	transient receptor potential, Cosens-Manning mutant, transient photreceptor potential, INAD localization-B, Transient receptor potential protein, dTRP, CG7875, 559, Trp, TRP, idl-B, dTrp, DmTRP	dmel-5.43-3R(-)::25740242-25746011	dmel-5.43-3R	25740242	25746011	-	dmel-5.43-3R::25720801-25756558	FlyFos018937	46450	25720801	25756558	FlyFos018937[16239-17301]	dmel-5.43-3R(-)[25740321-25740320]		grows	[NGS] validated	fully_covered;no mut;flipped	fully_covered	no mut	flipped	36	143	197	0	0	0							0864533050210965_E09	58519847_27_E_9_16239_17301_dmel-5.43-3R_25740321_25740320
0864533050210965_E10	https://transgeneome.mpi-cbg.de/transgeneomics/public/clone.html?wellId=59023387	FlyFos018946(Sk1[30046]::S000169_fly_pretag)::2XTY1-SGFP-V5-preTEV-BLRP-3XFLAGdFRT	FBgn0030300	Sk1	Sphingosine kinase 1, Sphingosine kinase I, Sphk1, SK1, CG1747	dmel-5.43-X(+)::11336574-11340045	dmel-5.43-X	11336574	11340045	+	dmel-5.43-X::11319173-11355978	FlyFos018946	47498	11319173	11355978	FlyFos018946[20417-21479]	dmel-5.43-X(+)[11319173-11355978]		grows	[NGS] validated	fully_covered;no mut;flipped	fully_covered	no mut	flipped	7	29	33	0	0	0		->21847|ATTTTTTTTTTTTTTA|ATTTTTTTTTTTTTA(0|7:7)	1	mut oustde of 100	mut_in_tag+1000		0864533050210965_E10	58519847_27_E_10_20417_21479_dmel-5.43-X_11319173_11355978
0864533050210965_E11	https://transgeneome.mpi-cbg.de/transgeneomics/public/clone.html?wellId=59023451	FlyFos018953(CG15022[34933]::S000169_fly_pretag)::2XTY1-SGFP-V5-preTEV-BLRP-3XFLAGdFRT	FBgn0035547	CG15022	BcDNA:RE24507	dmel-5.43-3L(-)::4459192-4460313	dmel-5.43-3L	4459192	4460313	-	dmel-5.43-3L::4447913-4484603	FlyFos018953	47383	4447913	4484603	FlyFos018953[25304-26366]	dmel-5.43-3L(-)[4459301-4459300]		grows	[NGS] validated	fully_covered;no mut;flipped	fully_covered	no mut	flipped	31	139	183	0	0	0							0864533050210965_E11	58519847_27_E_11_25304_26366_dmel-5.43-3L_4459301_4459300
0864533050210965_E12	https://transgeneome.mpi-cbg.de/transgeneomics/public/clone.html?wellId=59023515	FlyFos018971(CG13898[22002]::S000169_fly_pretag)::2XTY1-SGFP-V5-preTEV-BLRP-3XFLAGdFRT	FBgn0035161	CG13898		dmel-5.43-3L(-)::803427-804051	dmel-5.43-3L	803427	804051	-	dmel-5.43-3L::791149-826306	FlyFos018971	45850	791149	826306	FlyFos018971[12373-13435]	dmel-5.43-3L(-)[791149-826306]		grows	[NGS] validated	fully_covered;no mut;flipped	fully_covered	no mut	flipped	38	179	241	0	0	0							0864533050210965_E12	58519847_27_E_12_12373_13435_dmel-5.43-3L_791149_826306
0864533050210965_F01	https://transgeneome.mpi-cbg.de/transgeneomics/public/clone.html?wellId=59022819	FlyFos018849(Gr22a[25190]::S000169_fly_pretag)::2XTY1-SGFP-V5-preTEV-BLRP-3XFLAGdFRT	FBgn0045501	Gr22a	Gustatory receptor 22a, Gustatory receptor 2940.5, Gr2940.5, CG31662	dmel-5.43-2L(-)::1793668-1794917	dmel-5.43-2L	1793668	1794917	-	dmel-5.43-2L::1778111-1810792	FlyFos018849	43374	1778111	1810792	FlyFos018849[15561-16623]	dmel-5.43-2L(-)[1778111-1810792]		grows	[NGS] validated	fully_covered;no mut;flipped	fully_covered	no mut	flipped	8	29	24	0	0	0							0864533050210965_F01	58519847_27_F_1_15561_16623_dmel-5.43-2L_1778111_1810792
0864533050210965_F03	https://transgeneome.mpi-cbg.de/transgeneomics/public/clone.html?wellId=59022947	FlyFos018869(CG31680[36157]::S000169_fly_pretag)::2XTY1-SGFP-V5-preTEV-BLRP-3XFLAGdFRT	FBgn0051680	CG31680	BcDNA:AT19802	dmel-5.43-2L(+)::20640146-20640718	dmel-5.43-2L	20640146	20640718	+	dmel-5.43-2L::20635013-20667188	FlyFos018869	42868	20635013	20667188	FlyFos018869[26528-27590]	dmel-5.43-2L(+)[20640662-20640661]		grows	[NGS] validated	fully_covered;no mut;flipped	fully_covered	no mut	flipped	12	59	61	0	0	0							0864533050210965_F03	58519847_27_F_3_26528_27590_dmel-5.43-2L_20640662_20640661
0864533050210965_F04	https://transgeneome.mpi-cbg.de/transgeneomics/public/clone.html?wellId=59023011	FlyFos018873(CG6638[44823]::S000169_fly_pretag)::2XTY1-SGFP-V5-preTEV-BLRP-3XFLAGdFRT	FBgn0035911	CG6638		dmel-5.43-3L(-)::8567507-8569173	dmel-5.43-3L	8567507	8569173	-	dmel-5.43-3L::8562848-8602870	FlyFos018873	50715	8562848	8602870	FlyFos018873[35194-36256]	dmel-5.43-3L(-)[8567678-8567677]		grows	[NGS] validated	fully_covered;no mut;flipped	fully_covered	no mut	flipped	37	208	215	0	0	0							0864533050210965_F04	58519847_27_F_4_35194_36256_dmel-5.43-3L_8567678_8567677
0864533050210965_F05	https://transgeneome.mpi-cbg.de/transgeneomics/public/clone.html?wellId=59023075	FlyFos018889(CG7600[27413]::S000169_fly_pretag)::2XTY1-SGFP-V5-preTEV-BLRP-3XFLAGdFRT	FBgn0064766	CG7600		dmel-5.43-3L(+)::11203859-11207197	dmel-5.43-3L	11203859	11207197	+	dmel-5.43-3L::11189095-11218441	FlyFos018889	40039	11189095	11218441	FlyFos018889[17784-18846]	dmel-5.43-3L(+)[11189095-11218441]		grows	[NGS] validated	fully_covered;no mut;flipped	fully_covered	no mut	flipped	42	254	237	0	0	0							0864533050210965_F05	58519847_27_F_5_17784_18846_dmel-5.43-3L_11189095_11218441
0864533050210965_F06	https://transgeneome.mpi-cbg.de/transgeneomics/public/clone.html?wellId=59023139	FlyFos018909(snky[28620]::S000169_fly_pretag)::2XTY1-SGFP-V5-preTEV-BLRP-3XFLAGdFRT	FBgn0086916	snky	sneaky, CG11281, ms(3)sneaky, CG11281, ms(3)4, ms(3)snky, ms(3)ry4	dmel-5.43-3L(+)::13166782-13169797	dmel-5.43-3L	13166782	13169797	+	dmel-5.43-3L::13150805-13187305	FlyFos018909	47193	13150805	13187305	FlyFos018909[18991-20053]	dmel-5.43-3L(+)[13150805-13187305]		grows	[NGS] validated	fully_covered;no mut;flipped	fully_covered	no mut	flipped	42	239	214	0	0	0							0864533050210965_F06	58519847_27_F_6_18991_20053_dmel-5.43-3L_13150805_13187305
0864533050210965_F07	https://transgeneome.mpi-cbg.de/transgeneomics/public/clone.html?wellId=59023203	FlyFos018920(CG13244[25314]::S000169_fly_pretag)::2XTY1-SGFP-V5-preTEV-BLRP-3XFLAGdFRT	FBgn0032577	CG13244	BcDNA:GH27987	dmel-5.43-2L(+)::15916888-15917607	dmel-5.43-2L	15916888	15917607	+	dmel-5.43-2L::15894972-15933036	FlyFos018920	48757	15894972	15933036	FlyFos018920[15685-16747]	dmel-5.43-2L(+)[15917353-15917352]		grows	[NGS] validated	fully_covered;no mut;flipped	fully_covered	no mut	flipped	15	69	63	0	0	0							0864533050210965_F07	58519847_27_F_7_15685_16747_dmel-5.43-2L_15917353_15917352
0864533050210965_F08	https://transgeneome.mpi-cbg.de/transgeneomics/public/clone.html?wellId=59023267	FlyFos018928(Sln[19888]::S000169_fly_pretag)::2XTY1-SGFP-V5-preTEV-BLRP-3XFLAGdFRT	FBgn0033657	Sln	Silnoon, CG8271, CG8271	dmel-5.43-2R(+)::7732831-7739829	dmel-5.43-2R	7732831	7739829	+	dmel-5.43-2R::7714462-7749488	FlyFos018928	45719	7714462	7749488	FlyFos018928[10259-11321]	dmel-5.43-2R(+)[7739231-7739230]		grows	[NGS] validated	fully_covered;no mut;flipped	fully_covered	no mut	flipped	36	164	189	0	0	0							0864533050210965_F08	58519847_27_F_8_10259_11321_dmel-5.43-2R_7739231_7739230
0864533050210965_F09	https://transgeneome.mpi-cbg.de/transgeneomics/public/clone.html?wellId=59023331	FlyFos018937(capa[27323]::S000169_fly_pretag)::2XTY1-SGFP-V5-preTEV-BLRP-3XFLAGdFRT	FBgn0039722	capa	capability, Drm-myotropin, Cardioacceleratory peptide-2b, Periviscerokinin, pyrokinin, cap2b-like, myotropin-CAP2b-like, pyrokinin-like, pyrokinin-1, Pyrokinin, TGPSASSGLWFGPRLamide, CAP, myotropin, CAP[[2b]], CAP-2b, CAP2B-3, CAP2B-1, Drm-CAP-2, pyrokinin/PBAN-like, Drm-MT, capa-3, CAP2b-3, Cap-2b, capa-2, CAP2b-1, Drm-CAP2b/MT, Drm-PVK, CG15520, CAP2B-2, capa-1, Cap-1, Cap-3, CAP2b-2, Capa-2, C…	dmel-5.43-3R(-)::25738707-25740050	dmel-5.43-3R	25738707	25740050	-	dmel-5.43-3R::25720801-25756558	FlyFos018937	46450	25720801	25756558	FlyFos018937[17694-18756]	dmel-5.43-3R(-)[25738866-25738865]		grows	[NGS] validated	fully_covered;no mut;flipped	fully_covered	no mut	flipped	9	25	42	0	0	0							0864533050210965_F09	58519847_27_F_9_17694_18756_dmel-5.43-3R_25738866_25738865
0864533050210965_F10	https://transgeneome.mpi-cbg.de/transgeneomics/public/clone.html?wellId=59023395	FlyFos018948(CG12241[34259]::S000169_fly_pretag)::2XTY1-SGFP-V5-preTEV-BLRP-3XFLAGdFRT	FBgn0038304	CG12241		dmel-5.43-3R(+)::11044984-11048093	dmel-5.43-3R	11044984	11048093	+	dmel-5.43-3R::11023046-11056864	FlyFos018948	44511	11023046	11056864	FlyFos018948[24630-25692]	dmel-5.43-3R(+)[11023046-11056864]		grows	[NGS] validated	fully_covered;no mut;flipped	fully_covered	no mut	flipped	44	212	216	0	0	0							0864533050210965_F10	58519847_27_F_10_24630_25692_dmel-5.43-3R_11023046_11056864
0864533050210965_F11	https://transgeneome.mpi-cbg.de/transgeneomics/public/clone.html?wellId=59023459	FlyFos018953(CG11345[36911]::S000169_fly_pretag)::2XTY1-SGFP-V5-preTEV-BLRP-3XFLAGdFRT	FBgn0035546	CG11345		dmel-5.43-3L(-)::4457320-4458191	dmel-5.43-3L	4457320	4458191	-	dmel-5.43-3L::4447913-4484603	FlyFos018953	47383	4447913	4484603	FlyFos018953[27282-28344]	dmel-5.43-3L(-)[4457323-4457322]		grows	[NGS] validated	fully_covered;no mut;flipped	fully_covered	no mut	flipped	31	120	219	0	0	0							0864533050210965_F11	58519847_27_F_11_27282_28344_dmel-5.43-3L_4457323_4457322
0864533050210965_F12	https://transgeneome.mpi-cbg.de/transgeneomics/public/clone.html?wellId=59023523	FlyFos018977(Acp53Ea[32451]::S000169_fly_pretag)::2XTY1-SGFP-V5-preTEV-BLRP-3XFLAGdFRT	FBgn0015584	Acp53Ea	Accessory gland-specific peptide 53Ea, CG8622, Accessory gland protein 53Ea, BcDNA:AT09943, CG8622, Acp53E, ACP53EA	dmel-5.43-2R(-)::12637308-12637827	dmel-5.43-2R	12637308	12637827	-	dmel-5.43-2R::12630606-12660184	FlyFos018977	40271	12630606	12660184	FlyFos018977[22822-23884]	dmel-5.43-2R(-)[12637364-12637363]		grows	[NGS] validated	fully_covered;no mut;flipped	fully_covered	no mut	flipped	44	218	285	0	0	0							0864533050210965_F12	58519847_27_F_12_22822_23884_dmel-5.43-2R_12637364_12637363
0864533050210965_G02	https://transgeneome.mpi-cbg.de/transgeneomics/public/clone.html?wellId=59022891	FlyFos018866(sowi[36527]::S000169_fly_pretag)::2XTY1-SGFP-V5-preTEV-BLRP-3XFLAGdFRT	FBgn0037460	sowi	solwind, solwind, CG15178, sowi, CG15178	dmel-5.43-3R(-)::2452652-2453622	dmel-5.43-3R	2452652	2453622	-	dmel-5.43-3R::2425787-2462909	FlyFos018866	47815	2425787	2462909	FlyFos018866[26898-27960]	dmel-5.43-3R(-)[2425787-2462909]		grows	[NGS] validated	fully_covered;no mut;flipped	fully_covered	no mut	flipped	38	148	212	0	0	0							0864533050210965_G02	58519847_27_G_2_26898_27960_dmel-5.43-3R_2425787_2462909
0864533050210965_G09	https://transgeneome.mpi-cbg.de/transgeneomics/public/clone.html?wellId=59023339	FlyFos018938(MAN1[36890]::S000169_fly_pretag)::2XTY1-SGFP-V5-preTEV-BLRP-3XFLAGdFRT	FBgn0034962	MAN1	MAN1, BcDNA:LD24895, dMAN1, CG3167	dmel-5.43-2R(+)::19921732-19924231	dmel-5.43-2R	19921732	19924231	+	dmel-5.43-2R::19896911-19934136	FlyFos018938	47918	19896911	19934136	FlyFos018938[27261-28323]	dmel-5.43-2R(+)[19896911-19934136]		grows	[NGS] validated	fully_covered;no mut;flipped	fully_covered	no mut	flipped	43	258	184	0	0	0							0864533050210965_G09	58519847_27_G_9_27261_28323_dmel-5.43-2R_19896911_19934136
0864533050210965_G10	https://transgeneome.mpi-cbg.de/transgeneomics/public/clone.html?wellId=59023403	FlyFos018948(Spn88Eb[19071]::S000169_fly_pretag)::2XTY1-SGFP-V5-preTEV-BLRP-3XFLAGdFRT	FBgn0038299	Spn88Eb	Serpin 88Eb, Dm-serpin-88Eb, CG6687	dmel-5.43-3R(-)::11032418-11034484	dmel-5.43-3R	11032418	11034484	-	dmel-5.43-3R::11023046-11056864	FlyFos018948	44511	11023046	11056864	FlyFos018948[9442-10504]	dmel-5.43-3R(-)[11023046-11056864]		grows	[NGS] validated	fully_covered;no mut;flipped	fully_covered	no mut	flipped	12	59	52	0	0	0							0864533050210965_G10	58519847_27_G_10_9442_10504_dmel-5.43-3R_11023046_11056864
0864533050210965_G11	https://transgeneome.mpi-cbg.de/transgeneomics/public/clone.html?wellId=59023467	FlyFos018953(CG15023[33485]::S000169_fly_pretag)::2XTY1-SGFP-V5-preTEV-BLRP-3XFLAGdFRT	FBgn0035548	CG15023		dmel-5.43-3L(-)::4460621-4461339	dmel-5.43-3L	4460621	4461339	-	dmel-5.43-3L::4447913-4484603	FlyFos018953	47383	4447913	4484603	FlyFos018953[23856-24918]	dmel-5.43-3L(-)[4460749-4460748]		grows	[NGS] validated	fully_covered;no mut;flipped	fully_covered	no mut	flipped	26	169	187	0	0	0							0864533050210965_G11	58519847_27_G_11_23856_24918_dmel-5.43-3L_4460749_4460748
0864533050210965_G12	https://transgeneome.mpi-cbg.de/transgeneomics/public/clone.html?wellId=59023531	FlyFos018977(Acp53C14c[31504]::S000169_fly_pretag)::2XTY1-SGFP-V5-preTEV-BLRP-3XFLAGdFRT	FBgn0053530	Acp53C14c	Acp53C14c, HDC06801, CG33530	dmel-5.43-2R(-)::12638281-12638974	dmel-5.43-2R	12638281	12638974	-	dmel-5.43-2R::12630606-12660184	FlyFos018977	40271	12630606	12660184	FlyFos018977[21875-22937]	dmel-5.43-2R(-)[12638311-12638310]		grows	[NGS] validated	fully_covered;no mut;flipped	fully_covered	no mut	flipped	12	58	70	0	0	0							0864533050210965_G12	58519847_27_G_12_21875_22937_dmel-5.43-2R_12638311_12638310
0864533050210965_H02	https://transgeneome.mpi-cbg.de/transgeneomics/public/clone.html?wellId=59022899	FlyFos018866(CG15177[37976]::S000169_fly_pretag)::2XTY1-SGFP-V5-preTEV-BLRP-3XFLAGdFRT	FBgn0037461	CG15177		dmel-5.43-3R(-)::2453922-2455043	dmel-5.43-3R	2453922	2455043	-	dmel-5.43-3R::2425787-2462909	FlyFos018866	47815	2425787	2462909	FlyFos018866[28347-29409]	dmel-5.43-3R(-)[2425787-2462909]		grows	[NGS] validated	fully_covered;no mut;flipped	fully_covered	no mut	flipped	6	33	25	0	0	0							0864533050210965_H02	58519847_27_H_2_28347_29409_dmel-5.43-3R_2425787_2462909
0864533050210965_H03	https://transgeneome.mpi-cbg.de/transgeneomics/public/clone.html?wellId=59022963	FlyFos018869(phr6-4[33171]::S000169_fly_pretag)::2XTY1-SGFP-V5-preTEV-BLRP-3XFLAGdFRT	FBgn0016054	phr6-4	(6-4)-photolyase, (6-4) photolyase, 6-4 photolyase, (6-4)photolyase, photolyase, Dm 64, phr(6-4), CG2488, 64PHR, 38D.25, D6-4	dmel-5.43-2L(-)::20643351-20645789	dmel-5.43-2L	20643351	20645789	-	dmel-5.43-2L::20635013-20667188	FlyFos018869	42868	20635013	20667188	FlyFos018869[23542-24604]	dmel-5.43-2L(-)[20643648-20643647]		grows	[NGS] validated	fully_covered;no mut;flipped	fully_covered	no mut	flipped	10	36	29	0	0	0							0864533050210965_H03	58519847_27_H_3_23542_24604_dmel-5.43-2L_20643648_20643647
0864533050210965_H04	https://transgeneome.mpi-cbg.de/transgeneomics/public/clone.html?wellId=59023027	FlyFos018884(CG6356[21026]::S000169_fly_pretag)::2XTY1-SGFP-V5-preTEV-BLRP-3XFLAGdFRT	FBgn0039178	CG6356		dmel-5.43-3R(+)::20109856-20114343	dmel-5.43-3R	20109856	20114343	+	dmel-5.43-3R::20093548-20125332	FlyFos018884	42477	20093548	20125332	FlyFos018884[11397-12459]	dmel-5.43-3R(+)[20113937-20113936]		grows	[NGS] validated	fully_covered;no mut;flipped	fully_covered	no mut	flipped	33	164	168	0	0	0							0864533050210965_H04	58519847_27_H_4_11397_12459_dmel-5.43-3R_20113937_20113936
0864533050210965_H05	https://transgeneome.mpi-cbg.de/transgeneomics/public/clone.html?wellId=59023091	FlyFos018893(CG12034[35938]::S000169_fly_pretag)::2XTY1-SGFP-V5-preTEV-BLRP-3XFLAGdFRT	FBgn0035421	CG12034	nSMase	dmel-5.43-3L(+)::3219124-3220925	dmel-5.43-3L	3219124	3220925	+	dmel-5.43-3L::3194408-3234088	FlyFos018893	50373	3194408	3234088	FlyFos018893[26309-27371]	dmel-5.43-3L(+)[3194408-3234088]		grows	[NGS] validated	fully_covered;no mut;flipped	fully_covered	no mut	flipped	33	150	153	0	0	0							0864533050210965_H05	58519847_27_H_5_26309_27371_dmel-5.43-3L_3194408_3234088
0864533050210965_H06	https://transgeneome.mpi-cbg.de/transgeneomics/public/clone.html?wellId=59023155	FlyFos018916(CG7634[16392]::S000169_fly_pretag)::2XTY1-SGFP-V5-preTEV-BLRP-3XFLAGdFRT	FBgn0037101	CG7634		dmel-5.43-3L(+)::21558526-21560885	dmel-5.43-3L	21558526	21560885	+	dmel-5.43-3L::21536256-21567586	FlyFos018916	42023	21536256	21567586	FlyFos018916[6763-7825]	dmel-5.43-3L(+)[21560825-21560824]		grows	[NGS] validated	fully_covered;no mut;flipped	fully_covered	no mut	flipped	12	56	55	0	0	0							0864533050210965_H06	58519847_27_H_6_6763_7825_dmel-5.43-3L_21560825_21560824
0864533050210965_H08	https://transgeneome.mpi-cbg.de/transgeneomics/public/clone.html?wellId=59023283	FlyFos018928(CG34229[29537]::S000169_fly_pretag)::2XTY1-SGFP-V5-preTEV-BLRP-3XFLAGdFRT	FBgn0259832	CG34229	CG13191, CG13191	dmel-5.43-2R(+)::7729113-7729669	dmel-5.43-2R	7729113	7729669	+	dmel-5.43-2R::7714462-7749488	FlyFos018928	45719	7714462	7749488	FlyFos018928[19908-20970]	dmel-5.43-2R(+)[7729582-7729581]		grows	[NGS] validated	fully_covered;no mut;flipped	fully_covered	no mut	flipped	12	60	43	0	0	0							0864533050210965_H08	58519847_27_H_8_19908_20970_dmel-5.43-2R_7729582_7729581
0864533050210965_H10	https://transgeneome.mpi-cbg.de/transgeneomics/public/clone.html?wellId=59023411	FlyFos018949(CG32694[19415]::S000169_fly_pretag)::2XTY1-SGFP-V5-preTEV-BLRP-3XFLAGdFRT	FBgn0052694	CG32694	CG18512, CG12634, CG12649, BcDNA:RE02049	dmel-5.43-X(+)::9883728-9900915	dmel-5.43-X	9883728	9900915	+	dmel-5.43-X::9868143-9909553	FlyFos018949	52103	9868143	9909553	FlyFos018949[9786-10848]	dmel-5.43-X(+)[9899769-9899768]		grows	[NGS] validated	fully_covered;no mut;flipped	fully_covered	no mut	flipped	12	61	62	0	0	0							0864533050210965_H10	58519847_27_H_10_9786_10848_dmel-5.43-X_9899769_9899768
0864533050210965_H11	https://transgeneome.mpi-cbg.de/transgeneomics/public/clone.html?wellId=59023475	FlyFos018953(CG11349[19212]::S000169_fly_pretag)::2XTY1-SGFP-V5-preTEV-BLRP-3XFLAGdFRT	FBgn0035550	CG11349		dmel-5.43-3L(+)::4473068-4475095	dmel-5.43-3L	4473068	4475095	+	dmel-5.43-3L::4447913-4484603	FlyFos018953	47383	4447913	4484603	FlyFos018953[9583-10645]	dmel-5.43-3L(+)[4475022-4475021]		grows	[NGS] validated	fully_covered;no mut;flipped	fully_covered	no mut	flipped	28	104	168	0	0	0							0864533050210965_H11	58519847_27_H_11_9583_10645_dmel-5.43-3L_4475022_4475021
0864533050210965_H12	https://transgeneome.mpi-cbg.de/transgeneomics/public/clone.html?wellId=59023539	FlyFos018978(CG6745[16452]::S000169_fly_pretag)::2XTY1-SGFP-V5-preTEV-BLRP-3XFLAGdFRT	FBgn0035901	CG6745	CT20937	dmel-5.43-3L(+)::8503138-8506104	dmel-5.43-3L	8503138	8506104	+	dmel-5.43-3L::8487658-8512443	FlyFos018978	35478	8487658	8512443	FlyFos018978[6823-7885]	dmel-5.43-3L(+)[8505622-8505621]		grows	[NGS] validated	fully_covered;no mut;flipped	fully_covered	no mut	flipped	15	69	63	0	0	0							0864533050210965_H12	58519847_27_H_12_6823_7885_dmel-5.43-3L_8505622_8505621
10123066965770744_A02	https://transgeneome.mpi-cbg.de/transgeneomics/public/clone.html?wellId=59013711	FlyFos016950(CG33462[22138]::S000169_fly_pretag)::2XTY1-SGFP-V5-preTEV-BLRP-3XFLAGdFRT	FBgn0053462	CG33462	SP41, CG30086, CG8215	dmel-5.43-2R(+)::11584309-11585515	dmel-5.43-2R	11584309	11585515	+	dmel-5.43-2R::11562120-11597924	FlyFos016950	46497	11562120	11597924	FlyFos016950[12509-13571]	dmel-5.43-2R(+)[11585417-11585416]		grows	[NGS] validated	fully_covered;no mut;flipped	fully_covered	no mut	flipped	10	38	32	0	0	0							10123066965770744_A02	58519847_15_A_2_12509_13571_dmel-5.43-2R_11585417_11585416
10123066965770744_A03	https://transgeneome.mpi-cbg.de/transgeneomics/public/clone.html?wellId=59013775	FlyFos016954(Nup44A[18269]::S000169_fly_pretag)::2XTY1-SGFP-V5-preTEV-BLRP-3XFLAGdFRT	FBgn0033247	Nup44A	Nucleoporin 44A, nucleoporin-44A, Nup44A, CG8722, FBgn 33247, nup44A, seh1, Nup44A/Seh1	dmel-5.43-2R(+)::3875967-3878789	dmel-5.43-2R	3875967	3878789	+	dmel-5.43-2R::3852727-3887375	FlyFos016954	45341	3852727	3887375	FlyFos016954[8640-9702]	dmel-5.43-2R(+)[3878737-3878736]		grows	[NGS] validated	fully_covered;no mut;flipped	fully_covered	no mut	flipped	25	132	100	0	0	0							10123066965770744_A03	58519847_15_A_3_8640_9702_dmel-5.43-2R_3878737_3878736
10123066965770744_A04	https://transgeneome.mpi-cbg.de/transgeneomics/public/clone.html?wellId=59013839	FlyFos016965(CG12836[15135]::S000169_fly_pretag)::2XTY1-SGFP-V5-preTEV-BLRP-3XFLAGdFRT	FBgn0033140	CG12836		dmel-5.43-2R(+)::2955752-2957322	dmel-5.43-2R	2955752	2957322	+	dmel-5.43-2R::2951815-2985180	FlyFos016965	44058	2951815	2985180	FlyFos016965[5506-6568]	dmel-5.43-2R(+)[2951815-2985180]		grows	[NGS] validated	fully_covered;no mut;flipped	fully_covered	no mut	flipped	36	210	228	0	0	0							10123066965770744_A04	58519847_15_A_4_5506_6568_dmel-5.43-2R_2951815_2985180
10123066965770744_A05	https://transgeneome.mpi-cbg.de/transgeneomics/public/clone.html?wellId=59013903	FlyFos016969(CG5861[25642]::S000169_fly_pretag)::2XTY1-SGFP-V5-preTEV-BLRP-3XFLAGdFRT	FBgn0015338	CG5861	BG:DS02740.11, anon-35Fc, III, anon-35Fa	dmel-5.43-2L(-)::16305786-16307275	dmel-5.43-2L	16305786	16307275	-	dmel-5.43-2L::16289950-16328262	FlyFos016969	49005	16289950	16328262	FlyFos016969[16013-17075]	dmel-5.43-2L(-)[16289950-16328262]		grows	[NGS] validated	fully_covered;no mut;flipped	fully_covered	no mut	flipped	9	46	37	0	0	0							10123066965770744_A05	58519847_15_A_5_16013_17075_dmel-5.43-2L_16289950_16328262
10123066965770744_A07	https://transgeneome.mpi-cbg.de/transgeneomics/public/clone.html?wellId=59014031	FlyFos016990(clos[38629]::S000169_fly_pretag)::2XTY1-SGFP-V5-preTEV-BLRP-3XFLAGdFRT	FBgn0261016	clos	closca, CG12928, CG33479, closca, CG12927, CG1863, CG34364, CG42600, CG12928, clos, CG33479, closca, CG12927, CG1863	dmel-5.43-2R(-)::5475458-5487237	dmel-5.43-2R	5475458	5487237	-	dmel-5.43-2R::5462468-5504512	FlyFos016990	52737	5462468	5504512	FlyFos016990[29000-30062]	dmel-5.43-2R(-)[5475514-5475513]		grows	[NGS] validated	fully_covered;no mut;flipped	fully_covered	no mut	flipped	23	95	80	0	0	0							10123066965770744_A07	58519847_15_A_7_29000_30062_dmel-5.43-2R_5475514_5475513
10123066965770744_A08	https://transgeneome.mpi-cbg.de/transgeneomics/public/clone.html?wellId=59014095	FlyFos017000(CG7565[15768]::S000169_fly_pretag)::2XTY1-SGFP-V5-preTEV-BLRP-3XFLAGdFRT	FBgn0035833	CG7565	CT23145	dmel-5.43-3L(-)::8080735-8084912	dmel-5.43-3L	8080735	8084912	-	dmel-5.43-3L::8074963-8108374	FlyFos017000	44104	8074963	8108374	FlyFos017000[6139-7201]	dmel-5.43-3L(-)[8074963-8108374]		grows	[NGS] validated	fully_covered;no mut;flipped	fully_covered	no mut	flipped	12	49	75	0	0	0		->5268|TAAACTCATCAAAC|TTTTTTT(0|20:21)	1	mut oustde of 100	mut_in_tag+1000		10123066965770744_A08	58519847_15_A_8_6139_7201_dmel-5.43-3L_8074963_8108374
10123066965770744_A09	https://transgeneome.mpi-cbg.de/transgeneomics/public/clone.html?wellId=59014159	FlyFos017007(CG31678[41034]::S000169_fly_pretag)::2XTY1-SGFP-V5-preTEV-BLRP-3XFLAGdFRT	FBgn0051678	CG31678	CG17466, 38D.30, CG17465	dmel-5.43-2L(-)::20659128-20675941	dmel-5.43-2L	20659128	20675941	-	dmel-5.43-2L::20654515-20691019	FlyFos017007	47197	20654515	20691019	FlyFos017007[31405-32467]	dmel-5.43-2L(-)[20659616-20659615]		grows	[NGS] validated	fully_covered;no mut;flipped	fully_covered	no mut	flipped	22	72	84	0	0	0							10123066965770744_A09	58519847_15_A_9_31405_32467_dmel-5.43-2L_20659616_20659615
10123066965770744_A10	https://transgeneome.mpi-cbg.de/transgeneomics/public/clone.html?wellId=59014223	FlyFos017017(CG10418[17440]::S000169_fly_pretag)::2XTY1-SGFP-V5-preTEV-BLRP-3XFLAGdFRT	FBgn0036277	CG10418	BcDNA:GM14851	dmel-5.43-3L(+)::12329776-12330336	dmel-5.43-3L	12329776	12330336	+	dmel-5.43-3L::12296223-12338033	FlyFos017017	52503	12296223	12338033	FlyFos017017[7811-8873]	dmel-5.43-3L(+)[12330224-12330223]		grows	[NGS] validated	fully_covered;no mut;flipped	fully_covered	no mut	flipped	31	206	141	0	0	0							10123066965770744_A10	58519847_15_A_10_7811_8873_dmel-5.43-3L_12330224_12330223
10123066965770744_A11	https://transgeneome.mpi-cbg.de/transgeneomics/public/clone.html?wellId=59014287	FlyFos017025(galectin[45042]::S000169_fly_pretag)::2XTY1-SGFP-V5-preTEV-BLRP-3XFLAGdFRT	FBgn0031213	galectin	galectin, CG11372, Dmgal	dmel-5.43-2L(+)::71757-76211	dmel-5.43-2L	71757	76211	+	dmel-5.43-2L::40684-82575	FlyFos017025	52584	40684	82575	FlyFos017025[35413-36475]	dmel-5.43-2L(+)[40684-82575]		grows	[NGS] validated	fully_covered;no mut;flipped	fully_covered	no mut	flipped	4	62	25	0	0	0							10123066965770744_A11	58519847_15_A_11_35413_36475_dmel-5.43-2L_40684_82575
10123066965770744_A12	https://transgeneome.mpi-cbg.de/transgeneomics/public/clone.html?wellId=59014351	FlyFos017037(CG6435[17809]::S000169_fly_pretag)::2XTY1-SGFP-V5-preTEV-BLRP-3XFLAGdFRT	FBgn0034165	CG6435		dmel-5.43-2R(+)::12761284-12762453	dmel-5.43-2R	12761284	12762453	+	dmel-5.43-2R::12733439-12770412	FlyFos017037	47666	12733439	12770412	FlyFos017037[8180-9242]	dmel-5.43-2R(+)[12762234-12762233]		grows	[NGS] validated	fully_covered;no mut;flipped	fully_covered	no mut	flipped	7	70	26	0	0	0							10123066965770744_A12	58519847_15_A_12_8180_9242_dmel-5.43-2R_12762234_12762233
10123066965770744_B01	https://transgeneome.mpi-cbg.de/transgeneomics/public/clone.html?wellId=59013655	FlyFos016935(CG42498[17528]::S000169_fly_pretag)::2XTY1-SGFP-V5-preTEV-BLRP-3XFLAGdFRT	FBgn0260224	CG42498	Dromel_CG14550_FBtr0084974_uORF	dmel-5.43-3R(-)::21883069-21883945	dmel-5.43-3R	21883069	21883945	-	dmel-5.43-3R::21875616-21909872	FlyFos016935	44949	21875616	21909872	FlyFos016935[7899-8961]	dmel-5.43-3R(-)[21875616-21909872]		grows	[NGS] validated	fully_covered;no mut;flipped	fully_covered	no mut	flipped	30	129	168	0	0	0							10123066965770744_B01	58519847_15_B_1_7899_8961_dmel-5.43-3R_21875616_21909872
10123066965770744_B02	https://transgeneome.mpi-cbg.de/transgeneomics/public/clone.html?wellId=59013719	FlyFos016950(CG33461[23574]::S000169_fly_pretag)::2XTY1-SGFP-V5-preTEV-BLRP-3XFLAGdFRT	FBgn0053461	CG33461	SP41, CG30086, CG8215	dmel-5.43-2R(+)::11582891-11583983	dmel-5.43-2R	11582891	11583983	+	dmel-5.43-2R::11562120-11597924	FlyFos016950	46497	11562120	11597924	FlyFos016950[13945-15007]	dmel-5.43-2R(+)[11583981-11583980]		grows	[NGS] validated	fully_covered;no mut;flipped	fully_covered	no mut	flipped	19	87	62	0	0	0							10123066965770744_B02	58519847_15_B_2_13945_15007_dmel-5.43-2R_11583981_11583980
10123066965770744_B03	https://transgeneome.mpi-cbg.de/transgeneomics/public/clone.html?wellId=59013783	FlyFos016960(Eip55E[33030]::S000169_fly_pretag)::2XTY1-SGFP-V5-preTEV-BLRP-3XFLAGdFRT	FBgn0000566	Eip55E	Eip55E, Ecdysone-induced polypeptide 40kD, Ecdysone-induced protein 40kD, ecdysone induced protein 55E, Eip40, CG5345, EIP40, Eip55BD	dmel-5.43-2R(+)::14515399-14516784	dmel-5.43-2R	14515399	14516784	+	dmel-5.43-2R::14493279-14531555	FlyFos016960	48969	14493279	14531555	FlyFos016960[23401-24463]	dmel-5.43-2R(+)[14493279-14531555]		grows	[NGS] validated	fully_covered;no mut;flipped	fully_covered	no mut	flipped	22	106	73	0	0	0							10123066965770744_B03	58519847_15_B_3_23401_24463_dmel-5.43-2R_14493279_14531555
10123066965770744_B04	https://transgeneome.mpi-cbg.de/transgeneomics/public/clone.html?wellId=59013847	FlyFos016967(CG18539[31882]::S000169_fly_pretag)::2XTY1-SGFP-V5-preTEV-BLRP-3XFLAGdFRT	FBgn0034325	CG18539		dmel-5.43-2R(+)::14185686-14186408	dmel-5.43-2R	14185686	14186408	+	dmel-5.43-2R::14164132-14200938	FlyFos016967	47499	14164132	14200938	FlyFos016967[22253-23315]	dmel-5.43-2R(+)[14164132-14200938]		grows	[NGS] validated	fully_covered;no mut;flipped	fully_covered	no mut	flipped	31	221	140	0	0	0							10123066965770744_B04	58519847_15_B_4_22253_23315_dmel-5.43-2R_14164132_14200938
10123066965770744_B07	https://transgeneome.mpi-cbg.de/transgeneomics/public/clone.html?wellId=59014039	FlyFos016990(CG30338[27190]::S000169_fly_pretag)::2XTY1-SGFP-V5-preTEV-BLRP-3XFLAGdFRT	FBgn0050338	CG30338		dmel-5.43-2R(+)::5481552-5487010	dmel-5.43-2R	5481552	5487010	+	dmel-5.43-2R::5462468-5504512	FlyFos016990	52737	5462468	5504512	FlyFos016990[17561-18623]	dmel-5.43-2R(+)[5486953-5486952]		grows	[NGS] validated	fully_covered;no mut;flipped	fully_covered	no mut	flipped	21	100	74	0	0	0							10123066965770744_B07	58519847_15_B_7_17561_18623_dmel-5.43-2R_5486953_5486952
10123066965770744_B08	https://transgeneome.mpi-cbg.de/transgeneomics/public/clone.html?wellId=59014103	FlyFos017001(CG10205[31467]::S000169_fly_pretag)::2XTY1-SGFP-V5-preTEV-BLRP-3XFLAGdFRT	FBgn0033970	CG10205	CT28709	dmel-5.43-2R(+)::10720338-10721460	dmel-5.43-2R	10720338	10721460	+	dmel-5.43-2R::10704326-10743161	FlyFos017001	49528	10704326	10743161	FlyFos017001[21838-22900]	dmel-5.43-2R(+)[10721325-10721324]		grows	[NGS] validated	fully_covered;no mut;flipped	fully_covered	no mut	flipped	31	224	173	0	0	0							10123066965770744_B08	58519847_15_B_8_21838_22900_dmel-5.43-2R_10721325_10721324
10123066965770744_B09	https://transgeneome.mpi-cbg.de/transgeneomics/public/clone.html?wellId=59014167	FlyFos017007(CG2617[17379]::S000169_fly_pretag)::2XTY1-SGFP-V5-preTEV-BLRP-3XFLAGdFRT	FBgn0032877	CG2617	38E.2	dmel-5.43-2L(+)::20682370-20683629	dmel-5.43-2L	20682370	20683629	+	dmel-5.43-2L::20654515-20691019	FlyFos017007	47197	20654515	20691019	FlyFos017007[7750-8812]	dmel-5.43-2L(+)[20683271-20683270]		grows	[NGS] validated	fully_covered;no mut;flipped	fully_covered	no mut	flipped	34	165	206	0	0	0							10123066965770744_B09	58519847_15_B_9_7750_8812_dmel-5.43-2L_20683271_20683270
10123066965770744_B11	https://transgeneome.mpi-cbg.de/transgeneomics/public/clone.html?wellId=59014295	FlyFos017025(dbr[39839]::S000169_fly_pretag)::2XTY1-SGFP-V5-preTEV-BLRP-3XFLAGdFRT	FBgn0067779	dbr	debra, EP0456, BcDNA:LD26519, Dbr, EP456, Debra, CG11371	dmel-5.43-2L(+)::66721-71390	dmel-5.43-2L	66721	71390	+	dmel-5.43-2L::40684-82575	FlyFos017025	52584	40684	82575	FlyFos017025[30210-31272]	dmel-5.43-2L(+)[40684-82575]		grows	[NGS] validated	fully_covered;no mut;flipped	fully_covered	no mut	flipped	27	155	118	0	0	0							10123066965770744_B11	58519847_15_B_11_30210_31272_dmel-5.43-2L_40684_82575
10123066965770744_B12	https://transgeneome.mpi-cbg.de/transgeneomics/public/clone.html?wellId=59014359	FlyFos017037(CG6426[20797]::S000169_fly_pretag)::2XTY1-SGFP-V5-preTEV-BLRP-3XFLAGdFRT	FBgn0034162	CG6426	BcDNA:RH01665, l(2)k04810, n(2)k04810	dmel-5.43-2R(+)::12756897-12759359	dmel-5.43-2R	12756897	12759359	+	dmel-5.43-2R::12733439-12770412	FlyFos017037	47666	12733439	12770412	FlyFos017037[11168-12230]	dmel-5.43-2R(+)[12759246-12759245]		grows	[NGS] validated	fully_covered;no mut;flipped	fully_covered	no mut	flipped	30	120	141	0	0	0							10123066965770744_B12	58519847_15_B_12_11168_12230_dmel-5.43-2R_12759246_12759245
10123066965770744_C01	https://transgeneome.mpi-cbg.de/transgeneomics/public/clone.html?wellId=59013663	FlyFos016935(Dak1[14314]::S000169_fly_pretag)::2XTY1-SGFP-V5-preTEV-BLRP-3XFLAGdFRT	FBgn0028833	Dak1	Dak1, Dak1L, dak1, anon-WO0118547.320, Dm.UMP-CMP kinase, CG6092	dmel-5.43-3R(-)::21879959-21881210	dmel-5.43-3R	21879959	21881210	-	dmel-5.43-3R::21875616-21909872	FlyFos016935	44949	21875616	21909872	FlyFos016935[4685-5747]	dmel-5.43-3R(-)[21875616-21909872]		grows	[NGS] validated	fully_covered;no mut;flipped	fully_covered	no mut	flipped	31	173	109	0	0	0							10123066965770744_C01	58519847_15_C_1_4685_5747_dmel-5.43-3R_21875616_21909872
10123066965770744_C02	https://transgeneome.mpi-cbg.de/transgeneomics/public/clone.html?wellId=59013727	FlyFos016950(CG30082[35043]::S000169_fly_pretag)::2XTY1-SGFP-V5-preTEV-BLRP-3XFLAGdFRT	FBgn0050082	CG30082	CR30082	dmel-5.43-2R(-)::11572509-11573587	dmel-5.43-2R	11572509	11573587	-	dmel-5.43-2R::11562120-11597924	FlyFos016950	46497	11562120	11597924	FlyFos016950[25414-26476]	dmel-5.43-2R(-)[11572512-11572511]		grows	[NGS] validated	fully_covered;no mut;flipped	fully_covered	no mut	flipped	18	56	57	0	0	0							10123066965770744_C02	58519847_15_C_2_25414_26476_dmel-5.43-2R_11572512_11572511
10123066965770744_C03	https://transgeneome.mpi-cbg.de/transgeneomics/public/clone.html?wellId=59013791	FlyFos016960(CG5493[20803]::S000169_fly_pretag)::2XTY1-SGFP-V5-preTEV-BLRP-3XFLAGdFRT	FBgn0034364	CG5493		dmel-5.43-2R(-)::14504197-14506832	dmel-5.43-2R	14504197	14506832	-	dmel-5.43-2R::14493279-14531555	FlyFos016960	48969	14493279	14531555	FlyFos016960[11174-12236]	dmel-5.43-2R(-)[14493279-14531555]		grows	[NGS] validated	fully_covered;no mut;flipped	fully_covered	no mut	flipped	25	95	80	0	0	0							10123066965770744_C03	58519847_15_C_3_11174_12236_dmel-5.43-2R_14493279_14531555
10123066965770744_C04	https://transgeneome.mpi-cbg.de/transgeneomics/public/clone.html?wellId=59013855	FlyFos016967(CG18540[33035]::S000169_fly_pretag)::2XTY1-SGFP-V5-preTEV-BLRP-3XFLAGdFRT	FBgn0034326	CG18540		dmel-5.43-2R(+)::14186822-14187577	dmel-5.43-2R	14186822	14187577	+	dmel-5.43-2R::14164132-14200938	FlyFos016967	47499	14164132	14200938	FlyFos016967[23406-24468]	dmel-5.43-2R(+)[14164132-14200938]		grows	[NGS] validated	fully_covered;no mut;flipped	fully_covered	no mut	flipped	28	194	108	0	0	0							10123066965770744_C04	58519847_15_C_4_23406_24468_dmel-5.43-2R_14164132_14200938
10123066965770744_C05	https://transgeneome.mpi-cbg.de/transgeneomics/public/clone.html?wellId=59013919	FlyFos016976(CG11905[36572]::S000169_fly_pretag)::2XTY1-SGFP-V5-preTEV-BLRP-3XFLAGdFRT	FBgn0036678	CG11905		dmel-5.43-3L(-)::16921481-16928633	dmel-5.43-3L	16921481	16928633	-	dmel-5.43-3L::16909899-16948558	FlyFos016976	49352	16909899	16948558	FlyFos016976[26943-28005]	dmel-5.43-3L(-)[16921617-16921616]		grows	[NGS] validated	fully_covered;no mut;flipped	fully_covered	no mut	flipped	33	196	179	0	0	0							10123066965770744_C05	58519847_15_C_5_26943_28005_dmel-5.43-3L_16921617_16921616
10123066965770744_C06	https://transgeneome.mpi-cbg.de/transgeneomics/public/clone.html?wellId=59013983	FlyFos016986(CG33696[25341]::S000169_fly_pretag)::2XTY1-SGFP-V5-preTEV-BLRP-3XFLAGdFRT	FBgn0053696	CG33696	Dm CG33696, CG32047, CG16726	dmel-5.43-3L(+)::9637209-9652533	dmel-5.43-3L	9637209	9652533	+	dmel-5.43-3L::9627307-9667707	FlyFos016986	51093	9627307	9667707	FlyFos016986[15712-16774]	dmel-5.43-3L(+)[9651997-9651996]		grows	[NGS] validated	fully_covered;no mut;flipped	fully_covered	no mut	flipped	37	232	215	0	0	0							10123066965770744_C06	58519847_15_C_6_15712_16774_dmel-5.43-3L_9651997_9651996
10123066965770744_C07	https://transgeneome.mpi-cbg.de/transgeneomics/public/clone.html?wellId=59014047	FlyFos016990(CG30005[18415]::S000169_fly_pretag)::2XTY1-SGFP-V5-preTEV-BLRP-3XFLAGdFRT	FBgn0050005	CG30005	CG12930A, CG12930	dmel-5.43-2R(+)::5494797-5495855	dmel-5.43-2R	5494797	5495855	+	dmel-5.43-2R::5462468-5504512	FlyFos016990	52737	5462468	5504512	FlyFos016990[8786-9848]	dmel-5.43-2R(+)[5495728-5495727]		grows	[NGS] validated	fully_covered;no mut;flipped	fully_covered	no mut	flipped	33	196	122	0	0	0							10123066965770744_C07	58519847_15_C_7_8786_9848_dmel-5.43-2R_5495728_5495727
10123066965770744_C08	https://transgeneome.mpi-cbg.de/transgeneomics/public/clone.html?wellId=59014111	FlyFos017002(CG6045[17880]::S000169_fly_pretag)::2XTY1-SGFP-V5-preTEV-BLRP-3XFLAGdFRT	FBgn0038349	CG6045	DmAO3	dmel-5.43-3R(-)::11368474-11373457	dmel-5.43-3R	11368474	11373457	-	dmel-5.43-3R::11360345-11399530	FlyFos017002	49878	11360345	11399530	FlyFos017002[8251-9313]	dmel-5.43-3R(-)[11360345-11399530]		grows	[NGS] validated	fully_covered;no mut;flipped	fully_covered	no mut	flipped	28	108	184	0	0	0							10123066965770744_C08	58519847_15_C_8_8251_9313_dmel-5.43-3R_11360345_11399530
10123066965770744_C09	https://transgeneome.mpi-cbg.de/transgeneomics/public/clone.html?wellId=59014175	FlyFos017010(alphaTub84D[20878]::S000169_fly_pretag)::2XTY1-SGFP-V5-preTEV-BLRP-3XFLAGdFRT	FBgn0003885	alphaTub84D	alpha-Tubulin at 84D, alphatubulin, Tubulin at 84D, tubulin alpha3, alpha tubulin, alphaT, alpha-Tubulin, alpha-tubulin, alpha-tubulin at 84D, tubulin, alpha84D, alphaTUB, alpha3, aTub84D, ALPHA 84D, alpha-tub84D, alpha3t, D.m.ALPHA-84D, alpha-tubulin, CG2512, alpha-Tub84D, alphaTub84, T, Tub, alphaTub84D, 3t, alphaTub, alpha-Tub, DTA4, alphaTub3	dmel-5.43-3R(+)::3356478-3358454	dmel-5.43-3R	3356478	3358454	+	dmel-5.43-3R::3347083-3381950	FlyFos017010	45560	3347083	3381950	FlyFos017010[11249-12311]	dmel-5.43-3R(+)[3347083-3381950]		grows	[NGS] validated	fully_covered;no mut;flipped	fully_covered	no mut	flipped	31	175	163	0	0	0							10123066965770744_C09	58519847_15_C_9_11249_12311_dmel-5.43-3R_3347083_3381950
10123066965770744_C10	https://transgeneome.mpi-cbg.de/transgeneomics/public/clone.html?wellId=59014239	FlyFos017021(CG9849[18930]::S000169_fly_pretag)::2XTY1-SGFP-V5-preTEV-BLRP-3XFLAGdFRT	FBgn0034803	CG9849		dmel-5.43-2R(+)::18824802-18826548	dmel-5.43-2R	18824802	18826548	+	dmel-5.43-2R::18794740-18835604	FlyFos017021	51557	18794740	18835604	FlyFos017021[9301-10363]	dmel-5.43-2R(+)[18826305-18826304]		grows	[NGS] validated	fully_covered;no mut;flipped	fully_covered	no mut	flipped	7	34	28	0	0	0							10123066965770744_C10	58519847_15_C_10_9301_10363_dmel-5.43-2R_18826305_18826304
10123066965770744_C11	https://transgeneome.mpi-cbg.de/transgeneomics/public/clone.html?wellId=59014303	FlyFos017030(CG34027[20118]::S000169_fly_pretag)::2XTY1-SGFP-V5-preTEV-BLRP-3XFLAGdFRT	FBgn0054027	CG34027	BP1028	dmel-5.43-3R(-)::20929392-20934754	dmel-5.43-3R	20929392	20934754	-	dmel-5.43-3R::20918907-20951972	FlyFos017030	43758	20918907	20951972	FlyFos017030[10489-11551]	dmel-5.43-3R(-)[20918907-20951972]		grows	[NGS] validated	fully_covered;no mut;flipped	fully_covered	no mut	flipped	35	151	260	0	0	0							10123066965770744_C11	58519847_15_C_11_10489_11551_dmel-5.43-3R_20918907_20951972
10123066965770744_C12	https://transgeneome.mpi-cbg.de/transgeneomics/public/clone.html?wellId=59014367	FlyFos017037(Ef1beta[23461]::S000169_fly_pretag)::2XTY1-SGFP-V5-preTEV-BLRP-3XFLAGdFRT	FBgn0028737	Ef1beta	Elongation factor 1 beta, Elongation facto 1 beta, Elongation factor 1beta, Elongation factor 1 beta, CG6341, Elf 1 beta, EG:EG0003.7, 154264_at, Ef1beta, BcDNA.LD24492, BcDNA:LD24492	dmel-5.43-2R(+)::12755698-12756681	dmel-5.43-2R	12755698	12756681	+	dmel-5.43-2R::12733439-12770412	FlyFos017037	47666	12733439	12770412	FlyFos017037[13832-14894]	dmel-5.43-2R(+)[12756582-12756581]		grows	[NGS] validated	fully_covered;no mut;flipped	fully_covered	no mut	flipped	27	115	133	0	0	0							10123066965770744_C12	58519847_15_C_12_13832_14894_dmel-5.43-2R_12756582_12756581
10123066965770744_D01	https://transgeneome.mpi-cbg.de/transgeneomics/public/clone.html?wellId=59013671	FlyFos016936(CG9294[31552]::S000169_fly_pretag)::2XTY1-SGFP-V5-preTEV-BLRP-3XFLAGdFRT	FBgn0034666	CG9294	SP20	dmel-5.43-2R(+)::17748356-17749469	dmel-5.43-2R	17748356	17749469	+	dmel-5.43-2R::17737245-17771388	FlyFos016936	44836	17737245	17771388	FlyFos016936[21923-22985]	dmel-5.43-2R(+)[17749467-17749466]		grows	[NGS] validated	fully_covered;no mut;flipped	fully_covered	no mut	flipped	29	125	176	0	0	0							10123066965770744_D01	58519847_15_D_1_21923_22985_dmel-5.43-2R_17749467_17749466
10123066965770744_D02	https://transgeneome.mpi-cbg.de/transgeneomics/public/clone.html?wellId=59013735	FlyFos016951(CG31648[20772]::S000169_fly_pretag)::2XTY1-SGFP-V5-preTEV-BLRP-3XFLAGdFRT	FBgn0051648	CG31648	Complex IV assembly protein COX11, CG6922	dmel-5.43-2L(+)::5526962-5527854	dmel-5.43-2L	5526962	5527854	+	dmel-5.43-2L::5506802-5538939	FlyFos016951	42830	5506802	5538939	FlyFos016951[11143-12205]	dmel-5.43-2L(+)[5527798-5527797]		grows	[NGS] validated	fully_covered;no mut;flipped	fully_covered	no mut	flipped	21	85	94	0	0	0							10123066965770744_D02	58519847_15_D_2_11143_12205_dmel-5.43-2L_5527798_5527797
10123066965770744_D03	https://transgeneome.mpi-cbg.de/transgeneomics/public/clone.html?wellId=59013799	FlyFos016960(CG5482[34058]::S000169_fly_pretag)::2XTY1-SGFP-V5-preTEV-BLRP-3XFLAGdFRT	FBgn0034368	CG5482		dmel-5.43-2R(-)::14517420-14519403	dmel-5.43-2R	14517420	14519403	-	dmel-5.43-2R::14493279-14531555	FlyFos016960	48969	14493279	14531555	FlyFos016960[24429-25491]	dmel-5.43-2R(-)[14493279-14531555]		grows	[NGS] validated	fully_covered;no mut;flipped	fully_covered	no mut	flipped	6	17	29	0	0	0							10123066965770744_D03	58519847_15_D_3_24429_25491_dmel-5.43-2R_14493279_14531555
10123066965770744_D04	https://transgeneome.mpi-cbg.de/transgeneomics/public/clone.html?wellId=59013863	FlyFos016967(CG18538[30752]::S000169_fly_pretag)::2XTY1-SGFP-V5-preTEV-BLRP-3XFLAGdFRT	FBgn0034324	CG18538		dmel-5.43-2R(+)::14184575-14185256	dmel-5.43-2R	14184575	14185256	+	dmel-5.43-2R::14164132-14200938	FlyFos016967	47499	14164132	14200938	FlyFos016967[21123-22185]	dmel-5.43-2R(+)[14164132-14200938]		grows	[NGS] validated	fully_covered;no mut;flipped	fully_covered	no mut	flipped	28	177	106	0	0	0							10123066965770744_D04	58519847_15_D_4_21123_22185_dmel-5.43-2R_14164132_14200938
10123066965770744_D05	https://transgeneome.mpi-cbg.de/transgeneomics/public/clone.html?wellId=59013927	FlyFos016979(CG12858[23038]::S000169_fly_pretag)::2XTY1-SGFP-V5-preTEV-BLRP-3XFLAGdFRT	FBgn0033958	CG12858		dmel-5.43-2R(-)::10626864-10632834	dmel-5.43-2R	10626864	10632834	-	dmel-5.43-2R::10615280-10647691	FlyFos016979	43104	10615280	10647691	FlyFos016979[13409-14471]	dmel-5.43-2R(-)[10615280-10647691]		grows	[NGS] validated	fully_covered;no mut;flipped	fully_covered	no mut	flipped	33	127	194	0	0	0							10123066965770744_D05	58519847_15_D_5_13409_14471_dmel-5.43-2R_10615280_10647691
10123066965770744_D06	https://transgeneome.mpi-cbg.de/transgeneomics/public/clone.html?wellId=59013991	FlyFos016989(CG31729[20990]::S000169_fly_pretag)::2XTY1-SGFP-V5-preTEV-BLRP-3XFLAGdFRT	FBgn0051729	CG31729	CG6263, CG16823	dmel-5.43-2L(+)::13290006-13301668	dmel-5.43-2L	13290006	13301668	+	dmel-5.43-2L::13278332-13312422	FlyFos016989	44783	13278332	13312422	FlyFos016989[11361-12423]	dmel-5.43-2L(+)[13301063-13301062]		grows	[NGS] validated	fully_covered;no mut;flipped	fully_covered	no mut	flipped	31	123	135	0	0	0							10123066965770744_D06	58519847_15_D_6_11361_12423_dmel-5.43-2L_13301063_13301062
10123066965770744_D07	https://transgeneome.mpi-cbg.de/transgeneomics/public/clone.html?wellId=59014055	FlyFos016990(CG30000[19667]::S000169_fly_pretag)::2XTY1-SGFP-V5-preTEV-BLRP-3XFLAGdFRT	FBgn0050000	CG30000	CG12930B, CG12930, BcDNA:RE63575	dmel-5.43-2R(+)::5493495-5494689	dmel-5.43-2R	5493495	5494689	+	dmel-5.43-2R::5462468-5504512	FlyFos016990	52737	5462468	5504512	FlyFos016990[10038-11100]	dmel-5.43-2R(+)[5494476-5494475]		grows	[NGS] validated	fully_covered;no mut;flipped	fully_covered	no mut	flipped	22	128	130	0	0	0							10123066965770744_D07	58519847_15_D_7_10038_11100_dmel-5.43-2R_5494476_5494475
10123066965770744_D08	https://transgeneome.mpi-cbg.de/transgeneomics/public/clone.html?wellId=59014119	FlyFos017002(CG18516[23638]::S000169_fly_pretag)::2XTY1-SGFP-V5-preTEV-BLRP-3XFLAGdFRT	FBgn0038350	CG18516	DmAO4	dmel-5.43-3R(-)::11374350-11378494	dmel-5.43-3R	11374350	11378494	-	dmel-5.43-3R::11360345-11399530	FlyFos017002	49878	11360345	11399530	FlyFos017002[14009-15071]	dmel-5.43-3R(-)[11360345-11399530]		grows	[NGS] validated	fully_covered;no mut;flipped	fully_covered	no mut	flipped	26	145	149	0	0	0							10123066965770744_D08	58519847_15_D_8_14009_15071_dmel-5.43-3R_11360345_11399530
10123066965770744_D09	https://transgeneome.mpi-cbg.de/transgeneomics/public/clone.html?wellId=59014183	FlyFos017010(alpha-Est5[22536]::S000169_fly_pretag)::2XTY1-SGFP-V5-preTEV-BLRP-3XFLAGdFRT	FBgn0261393	alpha-Est5	alpha-Esterase-5, esterase-C, Esterase C, fragment D, EST-C, DmalphaE5, ESTC, alphaE5, EST9, aE5, Est-9, Est-C, D, CG1089, Est-c	dmel-5.43-3R(-)::3359218-3362247	dmel-5.43-3R	3359218	3362247	-	dmel-5.43-3R::3347083-3381950	FlyFos017010	45560	3347083	3381950	FlyFos017010[12907-13969]	dmel-5.43-3R(-)[3347083-3381950]		grows	[NGS] validated	fully_covered;no mut;flipped	fully_covered	no mut	flipped	30	116	180	0	0	0							10123066965770744_D09	58519847_15_D_9_12907_13969_dmel-5.43-3R_3347083_3381950
10123066965770744_D10	https://transgeneome.mpi-cbg.de/transgeneomics/public/clone.html?wellId=59014247	FlyFos017021(CG42678[28177]::S000169_fly_pretag)::2XTY1-SGFP-V5-preTEV-BLRP-3XFLAGdFRT	FBgn0261564	CG42678	anon-WO0118547.113, CG30190, BcDNA:RE29641, BcDNA:LD42159, CG30193, CG9848	dmel-5.43-2R(+)::18812613-18819567	dmel-5.43-2R	18812613	18819567	+	dmel-5.43-2R::18794740-18835604	FlyFos017021	51557	18794740	18835604	FlyFos017021[18548-19610]	dmel-5.43-2R(+)[18817058-18817057]		grows	[NGS] validated	fully_covered;no mut;flipped	fully_covered	no mut	flipped	23	110	84	0	0	0							10123066965770744_D10	58519847_15_D_10_18548_19610_dmel-5.43-2R_18817058_18817057
10123066965770744_D11	https://transgeneome.mpi-cbg.de/transgeneomics/public/clone.html?wellId=59014311	FlyFos017033(CG7229[32694]::S000169_fly_pretag)::2XTY1-SGFP-V5-preTEV-BLRP-3XFLAGdFRT	FBgn0034423	CG7229	Gene 4, 7229	dmel-5.43-2R(+)::15147419-15149744	dmel-5.43-2R	15147419	15149744	+	dmel-5.43-2R::15126582-15158253	FlyFos017033	42364	15126582	15158253	FlyFos017033[23065-24127]	dmel-5.43-2R(+)[15126582-15158253]		grows	[NGS] validated	fully_covered;no mut;flipped	fully_covered	no mut	flipped	37	190	168	0	0	0							10123066965770744_D11	58519847_15_D_11_23065_24127_dmel-5.43-2R_15126582_15158253
10123066965770744_D12	https://transgeneome.mpi-cbg.de/transgeneomics/public/clone.html?wellId=59014375	FlyFos017037(CG6429[18916]::S000169_fly_pretag)::2XTY1-SGFP-V5-preTEV-BLRP-3XFLAGdFRT	FBgn0046999	CG6429	BcDNA:RH62928	dmel-5.43-2R(+)::12760522-12761266	dmel-5.43-2R	12760522	12761266	+	dmel-5.43-2R::12733439-12770412	FlyFos017037	47666	12733439	12770412	FlyFos017037[9287-10349]	dmel-5.43-2R(+)[12761127-12761126]		grows	[NGS] validated	fully_covered;no mut;flipped	fully_covered	no mut	flipped	14	114	56	0	0	0							10123066965770744_D12	58519847_15_D_12_9287_10349_dmel-5.43-2R_12761127_12761126
10123066965770744_E02	https://transgeneome.mpi-cbg.de/transgeneomics/public/clone.html?wellId=59013743	FlyFos016951(CG6907[22849]::S000169_fly_pretag)::2XTY1-SGFP-V5-preTEV-BLRP-3XFLAGdFRT	FBgn0031711	CG6907		dmel-5.43-2L(+)::5524139-5525809	dmel-5.43-2L	5524139	5525809	+	dmel-5.43-2L::5506802-5538939	FlyFos016951	42830	5506802	5538939	FlyFos016951[13220-14282]	dmel-5.43-2L(+)[5525721-5525720]		grows	[NGS] validated	fully_covered;no mut;flipped	fully_covered	no mut	flipped	30	166	139	0	0	0							10123066965770744_E02	58519847_15_E_2_13220_14282_dmel-5.43-2L_5525721_5525720
10123066965770744_E03	https://transgeneome.mpi-cbg.de/transgeneomics/public/clone.html?wellId=59013807	FlyFos016960(Atg7[24580]::S000169_fly_pretag)::2XTY1-SGFP-V5-preTEV-BLRP-3XFLAGdFRT	FBgn0034366	Atg7	Autophagy-specific gene 7, autophagy-related protein 7, atg-7, CG5489, atg7	dmel-5.43-2R(-)::14507961-14512553	dmel-5.43-2R	14507961	14512553	-	dmel-5.43-2R::14493279-14531555	FlyFos016960	48969	14493279	14531555	FlyFos016960[14951-16013]	dmel-5.43-2R(-)[14493279-14531555]		grows	[NGS] validated	fully_covered;no mut;flipped	fully_covered	no mut	flipped	30	125	140	0	0	0							10123066965770744_E03	58519847_15_E_3_14951_16013_dmel-5.43-2R_14493279_14531555
10123066965770744_E04	https://transgeneome.mpi-cbg.de/transgeneomics/public/clone.html?wellId=59013871	FlyFos016967(CG14502[27598]::S000169_fly_pretag)::2XTY1-SGFP-V5-preTEV-BLRP-3XFLAGdFRT	FBgn0034321	CG14502		dmel-5.43-2R(+)::14176593-14182217	dmel-5.43-2R	14176593	14182217	+	dmel-5.43-2R::14164132-14200938	FlyFos016967	47499	14164132	14200938	FlyFos016967[17969-19031]	dmel-5.43-2R(+)[14164132-14200938]		grows	[NGS] validated	fully_covered;no mut;flipped	fully_covered	no mut	flipped	24	138	154	0	0	0							10123066965770744_E04	58519847_15_E_4_17969_19031_dmel-5.43-2R_14164132_14200938
10123066965770744_E05	https://transgeneome.mpi-cbg.de/transgeneomics/public/clone.html?wellId=59013935	FlyFos016979(AttA[29973]::S000169_fly_pretag)::2XTY1-SGFP-V5-preTEV-BLRP-3XFLAGdFRT	FBgn0012042	AttA	Attacin-A, attacinA, attacin-A, Attacin-A precursor, Attacin A, Attacin, attacin A, AttacinA, Attackin, attacin, anon-WO0140519.5, ATT, att A, BcDNA:LP05763, attA, CG10146, att, Att, Att A	dmel-5.43-2R(+)::10634876-10635699	dmel-5.43-2R	10634876	10635699	+	dmel-5.43-2R::10615280-10647691	FlyFos016979	43104	10615280	10647691	FlyFos016979[20344-21406]	dmel-5.43-2R(+)[10615280-10647691]		grows	[NGS] validated	fully_covered;no mut;flipped	fully_covered	no mut	flipped	13	59	42	0	0	0							10123066965770744_E05	58519847_15_E_5_20344_21406_dmel-5.43-2R_10615280_10647691
10123066965770744_E07	https://transgeneome.mpi-cbg.de/transgeneomics/public/clone.html?wellId=59014063	FlyFos016991(CG14701[24175]::S000169_fly_pretag)::2XTY1-SGFP-V5-preTEV-BLRP-3XFLAGdFRT	FBgn0037883	CG14701		dmel-5.43-3R(+)::7057634-7058261	dmel-5.43-3R	7057634	7058261	+	dmel-5.43-3R::7035363-7072682	FlyFos016991	48012	7035363	7072682	FlyFos016991[14546-15608]	dmel-5.43-3R(+)[7058138-7058137]		grows	[NGS] validated	fully_covered;no mut;flipped	fully_covered	no mut	flipped	24	133	82	0	0	0							10123066965770744_E07	58519847_15_E_7_14546_15608_dmel-5.43-3R_7058138_7058137
10123066965770744_E08	https://transgeneome.mpi-cbg.de/transgeneomics/public/clone.html?wellId=59014127	FlyFos017003(l(2)35Di[20425]::S000169_fly_pretag)::2XTY1-SGFP-V5-preTEV-BLRP-3XFLAGdFRT	FBgn0001989	l(2)35Di	lethal (2) 35Di, NADH ubiquinone oxidoreductase B17, NADH:ubiquinone oxidoreductase B17 subunit, BG:DS09217.1, CG13240, BcDNA:GM23292	dmel-5.43-2L(-)::15749601-15751054	dmel-5.43-2L	15749601	15751054	-	dmel-5.43-2L::15738913-15774103	FlyFos017003	45883	15738913	15774103	FlyFos017003[10796-11858]	dmel-5.43-2L(-)[15738913-15774103]		grows	[NGS] validated	fully_covered;no mut;flipped	fully_covered	no mut	flipped	34	190	213	0	0	0							10123066965770744_E08	58519847_15_E_8_10796_11858_dmel-5.43-2L_15738913_15774103
10123066965770744_E09	https://transgeneome.mpi-cbg.de/transgeneomics/public/clone.html?wellId=59014191	FlyFos017010(alpha-Est6[12908]::S000169_fly_pretag)::2XTY1-SGFP-V5-preTEV-BLRP-3XFLAGdFRT	FBgn0015574	alpha-Est6	alpha-Esterase-6, fragment G, fragment F, fragment E, Esterase-6, alphaE6, E, DmalphaE6, CG1108, Esterase-6, F, aE6, G	dmel-5.43-3R(-)::3350289-3354499	dmel-5.43-3R	3350289	3354499	-	dmel-5.43-3R::3347083-3381950	FlyFos017010	45560	3347083	3381950	FlyFos017010[3279-4341]	dmel-5.43-3R(-)[3347083-3381950]		grows	[NGS] validated	fully_covered;no mut;flipped	fully_covered	no mut	flipped	29	162	150	0	0	0							10123066965770744_E09	58519847_15_E_9_3279_4341_dmel-5.43-3R_3347083_3381950
10123066965770744_E10	https://transgeneome.mpi-cbg.de/transgeneomics/public/clone.html?wellId=59014255	FlyFos017021(Nup214[38662]::S000169_fly_pretag)::2XTY1-SGFP-V5-preTEV-BLRP-3XFLAGdFRT	FBgn0010660	Nup214	Nucleoporin 214, Nup214, DNup214, dCAN, l(2)10444, CAN/Nup214, CG3820, DCAN, CAN, nup214, Nup 214	dmel-5.43-2R(-)::18806459-18812255	dmel-5.43-2R	18806459	18812255	-	dmel-5.43-2R::18794740-18835604	FlyFos017021	51557	18794740	18835604	FlyFos017021[29033-30095]	dmel-5.43-2R(-)[18806573-18806572]		grows	[NGS] validated	fully_covered;no mut;flipped	fully_covered	no mut	flipped	30	117	126	0	0	0							10123066965770744_E10	58519847_15_E_10_29033_30095_dmel-5.43-2R_18806573_18806572
10123066965770744_E12	https://transgeneome.mpi-cbg.de/transgeneomics/public/clone.html?wellId=59014383	FlyFos017040(CG1315[38913]::S000169_fly_pretag)::2XTY1-SGFP-V5-preTEV-BLRP-3XFLAGdFRT	FBgn0026565	CG1315	argininosuccinate synthase-like, argininosuccinate synthase, BG:DS00004.14	dmel-5.43-3R(-)::2468031-2470156	dmel-5.43-3R	2468031	2470156	-	dmel-5.43-3R::2459578-2497417	FlyFos017040	48532	2459578	2497417	FlyFos017040[29284-30346]	dmel-5.43-3R(-)[2468135-2468134]		grows	[NGS] validated	fully_covered;no mut;flipped	fully_covered	no mut	flipped	34	116	261	0	0	0							10123066965770744_E12	58519847_15_E_12_29284_30346_dmel-5.43-3R_2468135_2468134
10123066965770744_F02	https://transgeneome.mpi-cbg.de/transgeneomics/public/clone.html?wellId=59013751	FlyFos016951(CG7371[27189]::S000169_fly_pretag)::2XTY1-SGFP-V5-preTEV-BLRP-3XFLAGdFRT	FBgn0031710	CG7371		dmel-5.43-2L(-)::5521281-5523877	dmel-5.43-2L	5521281	5523877	-	dmel-5.43-2L::5506802-5538939	FlyFos016951	42830	5506802	5538939	FlyFos016951[17560-18622]	dmel-5.43-2L(-)[5521381-5521380]		grows	[NGS] validated	fully_covered;no mut;flipped	fully_covered	no mut	flipped	21	68	75	0	0	0							10123066965770744_F02	58519847_15_F_2_17560_18622_dmel-5.43-2L_5521381_5521380
10123066965770744_F04	https://transgeneome.mpi-cbg.de/transgeneomics/public/clone.html?wellId=59013879	FlyFos016967(CG18536[28599]::S000169_fly_pretag)::2XTY1-SGFP-V5-preTEV-BLRP-3XFLAGdFRT	FBgn0034322	CG18536		dmel-5.43-2R(+)::14182264-14183163	dmel-5.43-2R	14182264	14183163	+	dmel-5.43-2R::14164132-14200938	FlyFos016967	47499	14164132	14200938	FlyFos016967[18970-20032]	dmel-5.43-2R(+)[14164132-14200938]		grows	[NGS] validated	fully_covered;no mut;flipped	fully_covered	no mut	flipped	31	154	152	0	0	0							10123066965770744_F04	58519847_15_F_4_18970_20032_dmel-5.43-2R_14164132_14200938
10123066965770744_F05	https://transgeneome.mpi-cbg.de/transgeneomics/public/clone.html?wellId=59013943	FlyFos016979(AttB[31828]::S000169_fly_pretag)::2XTY1-SGFP-V5-preTEV-BLRP-3XFLAGdFRT	FBgn0041581	AttB	Attacin-B, Attacin B, Attackin, attacin, Attacin B1, Attacin-B precursor, attacin B, Attacin, AttacinB, AttB1, CG18372, AttBn, Att, att B1, AttB2, attB, att	dmel-5.43-2R(+)::10636728-10637670	dmel-5.43-2R	10636728	10637670	+	dmel-5.43-2R::10615280-10647691	FlyFos016979	43104	10615280	10647691	FlyFos016979[22199-23261]	dmel-5.43-2R(+)[10615280-10647691]		grows	[NGS] validated	fully_covered;no mut;flipped	fully_covered	no mut	flipped	36	116	133	0	0	0							10123066965770744_F05	58519847_15_F_5_22199_23261_dmel-5.43-2R_10615280_10647691
10123066965770744_F07	https://transgeneome.mpi-cbg.de/transgeneomics/public/clone.html?wellId=59014071	FlyFos016991(CG17721[20677]::S000169_fly_pretag)::2XTY1-SGFP-V5-preTEV-BLRP-3XFLAGdFRT	FBgn0037885	CG17721	BcDNA:LP09251	dmel-5.43-3R(+)::7060862-7061799	dmel-5.43-3R	7060862	7061799	+	dmel-5.43-3R::7035363-7072682	FlyFos016991	48012	7035363	7072682	FlyFos016991[11048-12110]	dmel-5.43-3R(+)[7061636-7061635]		grows	[NGS] validated	fully_covered;no mut;flipped	fully_covered	no mut	flipped	22	115	110	0	0	0							10123066965770744_F07	58519847_15_F_7_11048_12110_dmel-5.43-3R_7061636_7061635
10123066965770744_F08	https://transgeneome.mpi-cbg.de/transgeneomics/public/clone.html?wellId=59014135	FlyFos017006(CG14903[40319]::S000169_fly_pretag)::2XTY1-SGFP-V5-preTEV-BLRP-3XFLAGdFRT	FBgn0038446	CG14903		dmel-5.43-3R(-)::12398901-12399580	dmel-5.43-3R	12398901	12399580	-	dmel-5.43-3R::12392112-12429640	FlyFos017006	48221	12392112	12429640	FlyFos017006[30690-31752]	dmel-5.43-3R(-)[12398952-12398951]		grows	[NGS] validated	fully_covered;no mut;flipped	fully_covered	no mut	flipped	29	128	137	0	0	0							10123066965770744_F08	58519847_15_F_8_30690_31752_dmel-5.43-3R_12398952_12398951
10123066965770744_F09	https://transgeneome.mpi-cbg.de/transgeneomics/public/clone.html?wellId=59014199	FlyFos017010(alpha-Est2[33345]::S000169_fly_pretag)::2XTY1-SGFP-V5-preTEV-BLRP-3XFLAGdFRT	FBgn0015570	alpha-Est2	alpha-Esterase-2, fragment B, alpha-esterase 2, alpha-EST2, DmalphaE2, alphaE2, alpha-Est2, Alpha-Est2, CG2505, aE2, B	dmel-5.43-3R(+)::3367533-3370952	dmel-5.43-3R	3367533	3370952	+	dmel-5.43-3R::3347083-3381950	FlyFos017010	45560	3347083	3381950	FlyFos017010[23716-24778]	dmel-5.43-3R(+)[3347083-3381950]		grows	[NGS] validated	fully_covered;no mut;flipped	fully_covered	no mut	flipped	28	134	123	0	0	0							10123066965770744_F09	58519847_15_F_9_23716_24778_dmel-5.43-3R_3347083_3381950
10123066965770744_F10	https://transgeneome.mpi-cbg.de/transgeneomics/public/clone.html?wellId=59014263	FlyFos017021(CG30187[40781]::S000169_fly_pretag)::2XTY1-SGFP-V5-preTEV-BLRP-3XFLAGdFRT	FBgn0050187	CG30187	BcDNA:SD12357	dmel-5.43-2R(-)::18804366-18806289	dmel-5.43-2R	18804366	18806289	-	dmel-5.43-2R::18794740-18835604	FlyFos017021	51557	18794740	18835604	FlyFos017021[31152-32214]	dmel-5.43-2R(-)[18804454-18804453]		grows	[NGS] validated	fully_covered;no mut;flipped	fully_covered	no mut	flipped	31	135	127	0	0	0							10123066965770744_F10	58519847_15_F_10_31152_32214_dmel-5.43-2R_18804454_18804453
10123066965770744_F11	https://transgeneome.mpi-cbg.de/transgeneomics/public/clone.html?wellId=59014327	FlyFos017033(CG33454[21583]::S000169_fly_pretag)::2XTY1-SGFP-V5-preTEV-BLRP-3XFLAGdFRT	FBgn0053454	CG33454		dmel-5.43-2R(-)::15138532-15139171	dmel-5.43-2R	15138532	15139171	-	dmel-5.43-2R::15126582-15158253	FlyFos017033	42364	15126582	15158253	FlyFos017033[11954-13016]	dmel-5.43-2R(-)[15126582-15158253]		grows	[NGS] validated	fully_covered;no mut;flipped	fully_covered	no mut	flipped	21	49	154	0	0	0							10123066965770744_F11	58519847_15_F_11_11954_13016_dmel-5.43-2R_15126582_15158253
10123066965770744_G01	https://transgeneome.mpi-cbg.de/transgeneomics/public/clone.html?wellId=59013695	FlyFos016945(ppk10[21260]::S000169_fly_pretag)::2XTY1-SGFP-V5-preTEV-BLRP-3XFLAGdFRT	FBgn0065110	ppk10	pickpocket 10, CG34042, PPK10, BP1007	dmel-5.43-2L(-)::10450134-10452201	dmel-5.43-2L	10450134	10452201	-	dmel-5.43-2L::10438507-10471114	FlyFos016945	43300	10438507	10471114	FlyFos016945[11631-12693]	dmel-5.43-2L(-)[10438507-10471114]		grows	[NGS] validated	fully_covered;no mut;flipped	fully_covered	no mut	flipped	10	41	36	0	0	0							10123066965770744_G01	58519847_15_G_1_11631_12693_dmel-5.43-2L_10438507_10471114
10123066965770744_G02	https://transgeneome.mpi-cbg.de/transgeneomics/public/clone.html?wellId=59013759	FlyFos016951(CG7382[29581]::S000169_fly_pretag)::2XTY1-SGFP-V5-preTEV-BLRP-3XFLAGdFRT	FBgn0031708	CG7382		dmel-5.43-2L(-)::5518893-5519889	dmel-5.43-2L	5518893	5519889	-	dmel-5.43-2L::5506802-5538939	FlyFos016951	42830	5506802	5538939	FlyFos016951[19952-21014]	dmel-5.43-2L(-)[5518989-5518988]		grows	[NGS] validated	fully_covered;no mut;flipped	fully_covered	no mut	flipped	37	138	236	0	0	0							10123066965770744_G02	58519847_15_G_2_19952_21014_dmel-5.43-2L_5518989_5518988
10123066965770744_G03	https://transgeneome.mpi-cbg.de/transgeneomics/public/clone.html?wellId=59013823	FlyFos016960(CG30122[36681]::S000169_fly_pretag)::2XTY1-SGFP-V5-preTEV-BLRP-3XFLAGdFRT	FBgn0050122	CG30122	LD11002, SAF-A, CG18610, CG5477	dmel-5.43-2R(-)::14519833-14526773	dmel-5.43-2R	14519833	14526773	-	dmel-5.43-2R::14493279-14531555	FlyFos016960	48969	14493279	14531555	FlyFos016960[27052-28114]	dmel-5.43-2R(-)[14493279-14531555]		grows	[NGS] validated	fully_covered;no mut;flipped	fully_covered	no mut	flipped	33	155	195	0	0	0							10123066965770744_G03	58519847_15_G_3_27052_28114_dmel-5.43-2R_14493279_14531555
10123066965770744_G04	https://transgeneome.mpi-cbg.de/transgeneomics/public/clone.html?wellId=59013887	FlyFos016967(CG18537[29634]::S000169_fly_pretag)::2XTY1-SGFP-V5-preTEV-BLRP-3XFLAGdFRT	FBgn0034323	CG18537		dmel-5.43-2R(+)::14183433-14184161	dmel-5.43-2R	14183433	14184161	+	dmel-5.43-2R::14164132-14200938	FlyFos016967	47499	14164132	14200938	FlyFos016967[20005-21067]	dmel-5.43-2R(+)[14164132-14200938]		grows	[NGS] validated	fully_covered;no mut;flipped	fully_covered	no mut	flipped	28	217	160	0	0	0							10123066965770744_G04	58519847_15_G_4_20005_21067_dmel-5.43-2R_14164132_14200938
10123066965770744_G06	https://transgeneome.mpi-cbg.de/transgeneomics/public/clone.html?wellId=59014015	FlyFos016990(CG12929[40510]::S000169_fly_pretag)::2XTY1-SGFP-V5-preTEV-BLRP-3XFLAGdFRT	FBgn0033429	CG12929		dmel-5.43-2R(-)::5473615-5474180	dmel-5.43-2R	5473615	5474180	-	dmel-5.43-2R::5462468-5504512	FlyFos016990	52737	5462468	5504512	FlyFos016990[30881-31943]	dmel-5.43-2R(-)[5473633-5473632]		grows	[NGS] validated	fully_covered;no mut;flipped	fully_covered	no mut	flipped	34	124	165	0	0	0							10123066965770744_G06	58519847_15_G_6_30881_31943_dmel-5.43-2R_5473633_5473632
10123066965770744_G07	https://transgeneome.mpi-cbg.de/transgeneomics/public/clone.html?wellId=59014079	FlyFos016991(CG6693[36083]::S000169_fly_pretag)::2XTY1-SGFP-V5-preTEV-BLRP-3XFLAGdFRT	FBgn0037878	CG6693		dmel-5.43-3R(-)::7045990-7047361	dmel-5.43-3R	7045990	7047361	-	dmel-5.43-3R::7035363-7072682	FlyFos016991	48012	7035363	7072682	FlyFos016991[26454-27516]	dmel-5.43-3R(-)[7046230-7046229]		grows	[NGS] validated	fully_covered;no mut;flipped	fully_covered	no mut	flipped	27	102	148	0	0	0							10123066965770744_G07	58519847_15_G_7_26454_27516_dmel-5.43-3R_7046230_7046229
10123066965770744_G08	https://transgeneome.mpi-cbg.de/transgeneomics/public/clone.html?wellId=59014143	FlyFos017006(CG14892[16497]::S000169_fly_pretag)::2XTY1-SGFP-V5-preTEV-BLRP-3XFLAGdFRT	FBgn0038447	CG14892	SP175	dmel-5.43-3R(+)::12420136-12422963	dmel-5.43-3R	12420136	12422963	+	dmel-5.43-3R::12392112-12429640	FlyFos017006	48221	12392112	12429640	FlyFos017006[6868-7930]	dmel-5.43-3R(+)[12422774-12422773]		grows	[NGS] validated	fully_covered;no mut;flipped	fully_covered	no mut	flipped	24	155	116	0	0	0							10123066965770744_G08	58519847_15_G_8_6868_7930_dmel-5.43-3R_12422774_12422773
10123066965770744_G09	https://transgeneome.mpi-cbg.de/transgeneomics/public/clone.html?wellId=59014207	FlyFos017010(Rtnl2[17227]::S000169_fly_pretag)::2XTY1-SGFP-V5-preTEV-BLRP-3XFLAGdFRT	FBgn0015831	Rtnl2	Rtnl2, tropomyosin-like, Tropomyosin-like-84D, CG1279, trop, rtnl2, Tml84D, anon-WO0170980.134	dmel-5.43-3R(-)::3354586-3355963	dmel-5.43-3R	3354586	3355963	-	dmel-5.43-3R::3347083-3381950	FlyFos017010	45560	3347083	3381950	FlyFos017010[7598-8660]	dmel-5.43-3R(-)[3347083-3381950]		grows	[NGS] validated	fully_covered;no mut;flipped	fully_covered	no mut	flipped	37	298	188	0	0	0							10123066965770744_G09	58519847_15_G_9_7598_8660_dmel-5.43-3R_3347083_3381950
10123066965770744_G10	https://transgeneome.mpi-cbg.de/transgeneomics/public/clone.html?wellId=59014271	FlyFos017024(CG7768[16564]::S000169_fly_pretag)::2XTY1-SGFP-V5-preTEV-BLRP-3XFLAGdFRT	FBgn0036415	CG7768		dmel-5.43-3L(+)::14211305-14212074	dmel-5.43-3L	14211305	14212074	+	dmel-5.43-3L::14182833-14218908	FlyFos017024	46768	14182833	14218908	FlyFos017024[6935-7997]	dmel-5.43-3L(+)[14211975-14211974]		grows	[NGS] validated	fully_covered;no mut;flipped	fully_covered	no mut	flipped	36	219	136	0	0	0		->30790|T|A(1|46:47)	1	mut oustde of 100	mut_in_tag+1000		10123066965770744_G10	58519847_15_G_10_6935_7997_dmel-5.43-3L_14211975_14211974
10123066965770744_G11	https://transgeneome.mpi-cbg.de/transgeneomics/public/clone.html?wellId=59014335	FlyFos017037(CG6421[19692]::S000169_fly_pretag)::2XTY1-SGFP-V5-preTEV-BLRP-3XFLAGdFRT	FBgn0025827	CG6421	EG:EG0003.8	dmel-5.43-2R(+)::12759755-12760413	dmel-5.43-2R	12759755	12760413	+	dmel-5.43-2R::12733439-12770412	FlyFos017037	47666	12733439	12770412	FlyFos017037[10063-11125]	dmel-5.43-2R(+)[12760351-12760350]		grows	[NGS] validated	fully_covered;no mut;flipped	fully_covered	no mut	flipped	36	201	185	0	0	0							10123066965770744_G11	58519847_15_G_11_10063_11125_dmel-5.43-2R_12760351_12760350
10123066965770744_H01	https://transgeneome.mpi-cbg.de/transgeneomics/public/clone.html?wellId=59013703	FlyFos016949(Scgdelta[35255]::S000169_fly_pretag)::2XTY1-SGFP-V5-preTEV-BLRP-3XFLAGdFRT	FBgn0025391	Scgdelta	Sarcoglycan delta, Sarcoglycan, delta-sarcoglycan, CT34621, CG14808, DmSCG-gammadelta, BEST:GH21860, Sgcd, Scgdelta, EG:4F1.1, GH21860	dmel-5.43-X(-)::1639909-1648096	dmel-5.43-X	1639909	1648096	-	dmel-5.43-X::1625497-1666051	FlyFos016949	51247	1625497	1666051	FlyFos016949[25626-26688]	dmel-5.43-X(-)[1640427-1640426]		grows	[NGS] validated	fully_covered;no mut;flipped	fully_covered	no mut	flipped	18	37	120	0	0	0							10123066965770744_H01	58519847_15_H_1_25626_26688_dmel-5.43-X_1640427_1640426
10123066965770744_H02	https://transgeneome.mpi-cbg.de/transgeneomics/public/clone.html?wellId=59013767	FlyFos016954(ACC[35011]::S000169_fly_pretag)::2XTY1-SGFP-V5-preTEV-BLRP-3XFLAGdFRT	FBgn0033246	ACC	Acetyl-CoA carboxylase, acetyl-coenzyme A carboxylase, Acetyl-CoA carboxylase, Acetyl CoA carboxylase, acetyl CoA carboxylase, acetyl-CoA carboxylase, acetyl coenzyme A carboxylase, ACC, CG11198, dACC, CG8723, DmACC, FBgn0043811	dmel-5.43-2R(-)::3861620-3874729	dmel-5.43-2R	3861620	3874729	-	dmel-5.43-2R::3852727-3887375	FlyFos016954	45341	3852727	3887375	FlyFos016954[25382-26444]	dmel-5.43-2R(-)[3861995-3861994]		grows	[NGS] validated	fully_covered;no mut;flipped	fully_covered	no mut	flipped	30	153	157	0	0	0							10123066965770744_H02	58519847_15_H_2_25382_26444_dmel-5.43-2R_3861995_3861994
10123066965770744_H03	https://transgeneome.mpi-cbg.de/transgeneomics/public/clone.html?wellId=59013831	FlyFos016965(CG12831[18382]::S000169_fly_pretag)::2XTY1-SGFP-V5-preTEV-BLRP-3XFLAGdFRT	FBgn0033141	CG12831		dmel-5.43-2R(-)::2960550-2961621	dmel-5.43-2R	2960550	2961621	-	dmel-5.43-2R::2951815-2985180	FlyFos016965	44058	2951815	2985180	FlyFos016965[8753-9815]	dmel-5.43-2R(-)[2951815-2985180]		grows	[NGS] validated	fully_covered;no mut;flipped	fully_covered	no mut	flipped	11	60	46	0	0	0							10123066965770744_H03	58519847_15_H_3_8753_9815_dmel-5.43-2R_2951815_2985180
10123066965770744_H04	https://transgeneome.mpi-cbg.de/transgeneomics/public/clone.html?wellId=59013895	FlyFos016969(heix[17238]::S000169_fly_pretag)::2XTY1-SGFP-V5-preTEV-BLRP-3XFLAGdFRT	FBgn0028375	heix	heixuedian, lethal(2)35Fc, l(2)35Fc, ipa-6d, 124/1, CG5876, l(2)k12401, BG:DS02740.7	dmel-5.43-2L(-)::16296049-16299875	dmel-5.43-2L	16296049	16299875	-	dmel-5.43-2L::16289950-16328262	FlyFos016969	49005	16289950	16328262	FlyFos016969[7609-8671]	dmel-5.43-2L(-)[16289950-16328262]		grows	[NGS] validated	fully_covered;no mut;flipped	fully_covered	no mut	flipped	36	172	165	0	0	0							10123066965770744_H04	58519847_15_H_4_7609_8671_dmel-5.43-2L_16289950_16328262
10123066965770744_H05	https://transgeneome.mpi-cbg.de/transgeneomics/public/clone.html?wellId=59013959	FlyFos016980(CG7967[27003]::S000169_fly_pretag)::2XTY1-SGFP-V5-preTEV-BLRP-3XFLAGdFRT	FBgn0035251	CG7967		dmel-5.43-3L(-)::1651432-1652918	dmel-5.43-3L	1651432	1652918	-	dmel-5.43-3L::1634267-1669527	FlyFos016980	45953	1634267	1669527	FlyFos016980[17374-18436]	dmel-5.43-3L(-)[1634267-1669527]		grows	[NGS] validated	fully_covered;no mut;flipped	fully_covered	no mut	flipped	39	137	190	0	0	0							10123066965770744_H05	58519847_15_H_5_17374_18436_dmel-5.43-3L_1634267_1669527
10123066965770744_H06	https://transgeneome.mpi-cbg.de/transgeneomics/public/clone.html?wellId=59014023	FlyFos016990(CG1902[21698]::S000169_fly_pretag)::2XTY1-SGFP-V5-preTEV-BLRP-3XFLAGdFRT	FBgn0033434	CG1902		dmel-5.43-2R(+)::5481588-5493129	dmel-5.43-2R	5481588	5493129	+	dmel-5.43-2R::5462468-5504512	FlyFos016990	52737	5462468	5504512	FlyFos016990[12069-13131]	dmel-5.43-2R(+)[5492445-5492444]		grows	[NGS] validated	fully_covered;no mut;flipped	fully_covered	no mut	flipped	20	104	59	0	0	0							10123066965770744_H06	58519847_15_H_6_12069_13131_dmel-5.43-2R_5492445_5492444
10123066965770744_H07	https://transgeneome.mpi-cbg.de/transgeneomics/public/clone.html?wellId=59014087	FlyFos016999(CG5361[21446]::S000169_fly_pretag)::2XTY1-SGFP-V5-preTEV-BLRP-3XFLAGdFRT	FBgn0037786	CG5361		dmel-5.43-3R(-)::5899543-5901095	dmel-5.43-3R	5899543	5901095	-	dmel-5.43-3R::5887769-5928537	FlyFos016999	51461	5887769	5928537	FlyFos016999[11817-12879]	dmel-5.43-3R(-)[5887769-5928537]		grows	[NGS] validated	fully_covered;no mut;flipped	fully_covered	no mut	flipped	3	13	17	0	0	0							10123066965770744_H07	58519847_15_H_7_11817_12879_dmel-5.43-3R_5887769_5928537
10123066965770744_H08	https://transgeneome.mpi-cbg.de/transgeneomics/public/clone.html?wellId=59014151	FlyFos017006(Scp2[38475]::S000169_fly_pretag)::2XTY1-SGFP-V5-preTEV-BLRP-3XFLAGdFRT	FBgn0020907	Scp2	Sarcoplasmic calcium-binding protein 2, Drosophila Ca[2+]-binding protein A.2, Ca2+-sensing low molecular weight GTPase, Cex Ca2+-sensing low molecular weight, Calexcitin, JHDK, dSCP2, cex, Cex, SCP2, CE, Dcabp-A.2, CG14904	dmel-5.43-3R(-)::12400265-12409382	dmel-5.43-3R	12400265	12409382	-	dmel-5.43-3R::12392112-12429640	FlyFos017006	48221	12392112	12429640	FlyFos017006[28846-29908]	dmel-5.43-3R(-)[12400796-12400795]		grows	[NGS] validated	fully_covered;no mut;flipped	fully_covered	no mut	flipped	31	142	181	0	0	0							10123066965770744_H08	58519847_15_H_8_28846_29908_dmel-5.43-3R_12400796_12400795
10123066965770744_H09	https://transgeneome.mpi-cbg.de/transgeneomics/public/clone.html?wellId=59014215	FlyFos017016(PGRP-LF[46374]::S000169_fly_pretag)::2XTY1-SGFP-V5-preTEV-BLRP-3XFLAGdFRT	FBgn0035977	PGRP-LF	Peptidoglycan recognition protein LF, PRGP-like, Peptidoglycan-recognition protein-LF, PGRP-LCa, PGRP-like, PGRPLF, CG4437, anon-WO0118547.581	dmel-5.43-3L(+)::9342711-9344589	dmel-5.43-3L	9342711	9344589	+	dmel-5.43-3L::9307675-9347809	FlyFos017016	50827	9307675	9347809	FlyFos017016[36745-37807]	dmel-5.43-3L(+)[9307675-9347809]		grows	[NGS] validated	fully_covered;no mut;flipped	fully_covered	no mut	flipped	25	152	113	0	0	0							10123066965770744_H09	58519847_15_H_9_36745_37807_dmel-5.43-3L_9307675_9347809
10123066965770744_H10	https://transgeneome.mpi-cbg.de/transgeneomics/public/clone.html?wellId=59014279	FlyFos017024(CG32141[31232]::S000169_fly_pretag)::2XTY1-SGFP-V5-preTEV-BLRP-3XFLAGdFRT	FBgn0052141	CG32141		dmel-5.43-3L(+)::14196423-14197394	dmel-5.43-3L	14196423	14197394	+	dmel-5.43-3L::14182833-14218908	FlyFos017024	46768	14182833	14218908	FlyFos017024[21603-22665]	dmel-5.43-3L(+)[14197307-14197306]		grows	[NGS] validated	fully_covered;no mut;flipped	fully_covered	no mut	flipped	39	211	178	0	0	0							10123066965770744_H10	58519847_15_H_10_21603_22665_dmel-5.43-3L_14197307_14197306
10123066965770744_H11	https://transgeneome.mpi-cbg.de/transgeneomics/public/clone.html?wellId=59014343	FlyFos017037(Fen1[38416]::S000169_fly_pretag)::2XTY1-SGFP-V5-preTEV-BLRP-3XFLAGdFRT	FBgn0025832	Fen1	Flap endonuclease 1, EG:EG0003.3, CG8648, DmFEN-1, FEN1	dmel-5.43-2R(-)::12741482-12742843	dmel-5.43-2R	12741482	12742843	-	dmel-5.43-2R::12733439-12770412	FlyFos017037	47666	12733439	12770412	FlyFos017037[28787-29849]	dmel-5.43-2R(-)[12741627-12741626]		grows	[NGS] validated	fully_covered;no mut;flipped	fully_covered	no mut	flipped	33	165	150	0	0	0							10123066965770744_H11	58519847_15_H_11_28787_29849_dmel-5.43-2R_12741627_12741626
10123066965770744_H12	https://transgeneome.mpi-cbg.de/transgeneomics/public/clone.html?wellId=59014407	FlyFos017046(CG32588[24648]::S000169_fly_pretag)::2XTY1-SGFP-V5-preTEV-BLRP-3XFLAGdFRT	FBgn0052588	CG32588	NEST:bs07c08, bs07c08.y1, BcDNA:AT31812	dmel-5.43-X(-)::15099844-15100669	dmel-5.43-X	15099844	15100669	-	dmel-5.43-X::15079121-15114943	FlyFos017046	46515	15079121	15114943	FlyFos017046[15019-16081]	dmel-5.43-X(-)[15099926-15099925]		grows	[NGS] validated	fully_covered;no mut;flipped	fully_covered	no mut	flipped	32	154	147	0	0	0							10123066965770744_H12	58519847_15_H_12_15019_16081_dmel-5.43-X_15099926_15099925
1213189838248655_A03	https://transgeneome.mpi-cbg.de/transgeneomics/public/clone.html?wellId=59026712	FlyFos019670(CG5199[31308]::S000169_fly_pretag)::2XTY1-SGFP-V5-preTEV-BLRP-3XFLAGdFRT	FBgn0036994	CG5199	CUT8	dmel-5.43-3L(-)::20443632-20445961	dmel-5.43-3L	20443632	20445961	-	dmel-5.43-3L::20422235-20462516	FlyFos019670	50974	20422235	20462516	FlyFos019670[21679-22741]	dmel-5.43-3L(-)[20422235-20462516]		grows	[NGS] validated	fully_covered;no mut;flipped	fully_covered	no mut	flipped	6	19	30	0	0	0							1213189838248655_A03	58519847_32_A_3_21679_22741_dmel-5.43-3L_20422235_20462516
1213189838248655_A07	https://transgeneome.mpi-cbg.de/transgeneomics/public/clone.html?wellId=59026968	FlyFos019724(CG14965[24440]::S000169_fly_pretag)::2XTY1-SGFP-V5-preTEV-BLRP-3XFLAGdFRT	FBgn0035414	CG14965	dmLD47616p, ORF1, anon-63BC-T3, 63BC-T3	dmel-5.43-3L(-)::3190622-3192468	dmel-5.43-3L	3190622	3192468	-	dmel-5.43-3L::3170903-3205569	FlyFos019724	45359	3170903	3205569	FlyFos019724[14811-15873]	dmel-5.43-3L(-)[3190760-3190759]		grows	[NGS] validated	fully_covered;no mut;flipped	fully_covered	no mut	flipped	10	47	50	0	0	0							1213189838248655_A07	58519847_32_A_7_14811_15873_dmel-5.43-3L_3190760_3190759
1213189838248655_A08	https://transgeneome.mpi-cbg.de/transgeneomics/public/clone.html?wellId=59027032	FlyFos019739(CG7239[37896]::S000169_fly_pretag)::2XTY1-SGFP-V5-preTEV-BLRP-3XFLAGdFRT	FBgn0031740	CG7239	anon-EST:Posey250	dmel-5.43-2L(+)::5802255-5804030	dmel-5.43-2L	5802255	5804030	+	dmel-5.43-2L::5775575-5815192	FlyFos019739	50310	5775575	5815192	FlyFos019739[28267-29329]	dmel-5.43-2L(+)[5775575-5815192]		grows	[NGS] validated	fully_covered;no mut;flipped	fully_covered	no mut	flipped	41	305	291	0	0	0							1213189838248655_A08	58519847_32_A_8_28267_29329_dmel-5.43-2L_5775575_5815192
1213189838248655_A09	https://transgeneome.mpi-cbg.de/transgeneomics/public/clone.html?wellId=59027096	FlyFos019754(CG11864[17949]::S000169_fly_pretag)::2XTY1-SGFP-V5-preTEV-BLRP-3XFLAGdFRT	FBgn0028944	CG11864	BG:BACR44L22.8, BACR44L22.8	dmel-5.43-2L(-)::15612494-15613335	dmel-5.43-2L	15612494	15613335	-	dmel-5.43-2L::15604202-15636241	FlyFos019754	42732	15604202	15636241	FlyFos019754[8320-9382]	dmel-5.43-2L(-)[15604202-15636241]		grows	[NGS] validated	fully_covered;no mut;flipped	fully_covered	no mut	flipped	11	38	55	0	0	0							1213189838248655_A09	58519847_32_A_9_8320_9382_dmel-5.43-2L_15604202_15636241
1213189838248655_A10	https://transgeneome.mpi-cbg.de/transgeneomics/public/clone.html?wellId=59027160	FlyFos019762(CG8188[37356]::S000169_fly_pretag)::2XTY1-SGFP-V5-preTEV-BLRP-3XFLAGdFRT	FBgn0030863	CG8188	Ubc	dmel-5.43-X(-)::17593805-17596994	dmel-5.43-X	17593805	17596994	-	dmel-5.43-X::17582866-17622777	FlyFos019762	50604	17582866	17622777	FlyFos019762[27727-28789]	dmel-5.43-X(-)[17595052-17595051]		grows	[NGS] validated	fully_covered;no mut;flipped	fully_covered	no mut	flipped	4	15	19	0	0	0							1213189838248655_A10	58519847_32_A_10_27727_28789_dmel-5.43-X_17595052_17595051
1213189838248655_B02	https://transgeneome.mpi-cbg.de/transgeneomics/public/clone.html?wellId=59026656	FlyFos019653(CG6652[33809]::S000169_fly_pretag)::2XTY1-SGFP-V5-preTEV-BLRP-3XFLAGdFRT	FBgn0036687	CG6652		dmel-5.43-3L(-)::17013440-17015956	dmel-5.43-3L	17013440	17015956	-	dmel-5.43-3L::17002577-17037835	FlyFos019653	45951	17002577	17037835	FlyFos019653[24180-25242]	dmel-5.43-3L(-)[17013657-17013656]		grows	[NGS] validated	fully_covered;no mut;flipped	fully_covered	no mut	flipped	6	17	18	0	0	0							1213189838248655_B02	58519847_32_B_2_24180_25242_dmel-5.43-3L_17013657_17013656
1213189838248655_B03	https://transgeneome.mpi-cbg.de/transgeneomics/public/clone.html?wellId=59026720	FlyFos019670(CG5932[42511]::S000169_fly_pretag)::2XTY1-SGFP-V5-preTEV-BLRP-3XFLAGdFRT	FBgn0036996	CG5932		dmel-5.43-3L(+)::20453799-20455374	dmel-5.43-3L	20453799	20455374	+	dmel-5.43-3L::20422235-20462516	FlyFos019670	50974	20422235	20462516	FlyFos019670[32882-33944]	dmel-5.43-3L(+)[20422235-20462516]		grows	[NGS] validated	fully_covered;no mut;flipped	fully_covered	no mut	flipped	6	26	22	0	0	0							1213189838248655_B03	58519847_32_B_3_32882_33944_dmel-5.43-3L_20422235_20462516
1213189838248655_B06	https://transgeneome.mpi-cbg.de/transgeneomics/public/clone.html?wellId=59026912	FlyFos019707(CG3264[41989]::S000169_fly_pretag)::2XTY1-SGFP-V5-preTEV-BLRP-3XFLAGdFRT	FBgn0034712	CG3264		dmel-5.43-2R(-)::18096412-18098247	dmel-5.43-2R	18096412	18098247	-	dmel-5.43-2R::18088023-18128868	FlyFos019707	51538	18088023	18128868	FlyFos019707[32360-33422]	dmel-5.43-2R(-)[18096510-18096509]		grows	[NGS] validated	fully_covered;no mut;flipped	fully_covered	no mut	flipped	5	19	20	0	0	0							1213189838248655_B06	58519847_32_B_6_32360_33422_dmel-5.43-2R_18096510_18096509
1213189838248655_B08	https://transgeneome.mpi-cbg.de/transgeneomics/public/clone.html?wellId=59027040	FlyFos019749(CG2014[37855]::S000169_fly_pretag)::2XTY1-SGFP-V5-preTEV-BLRP-3XFLAGdFRT	FBgn0039669	CG2014	NADH:ubiquinone oxidoreductase 20 kDa subunit	dmel-5.43-3R(+)::25341535-25342249	dmel-5.43-3R	25341535	25342249	+	dmel-5.43-3R::25313978-25353321	FlyFos019749	50036	25313978	25353321	FlyFos019749[28226-29288]	dmel-5.43-3R(+)[25313978-25353321]		grows	[NGS] validated	fully_covered;no mut;flipped	fully_covered	no mut	flipped	5	29	16	0	0	0							1213189838248655_B08	58519847_32_B_8_28226_29288_dmel-5.43-3R_25313978_25353321
1213189838248655_B11	https://transgeneome.mpi-cbg.de/transgeneomics/public/clone.html?wellId=59027232	FlyFos019776(CG5177[27556]::S000169_fly_pretag)::2XTY1-SGFP-V5-preTEV-BLRP-3XFLAGdFRT	FBgn0031908	CG5177	trehalose-phosphatase	dmel-5.43-2L(+)::7405214-7408475	dmel-5.43-2L	7405214	7408475	+	dmel-5.43-2L::7390471-7423565	FlyFos019776	43787	7390471	7423565	FlyFos019776[17927-18989]	dmel-5.43-2L(+)[7390471-7423565]		grows	[NGS] validated	fully_covered;no mut;flipped	fully_covered	no mut	flipped	7	41	37	0	0	0							1213189838248655_B11	58519847_32_B_11_17927_18989_dmel-5.43-2L_7390471_7423565
1213189838248655_B12	https://transgeneome.mpi-cbg.de/transgeneomics/public/clone.html?wellId=59027296	FlyFos019785(CG4286[32625]::S000169_fly_pretag)::2XTY1-SGFP-V5-preTEV-BLRP-3XFLAGdFRT	FBgn0034601	CG4286		dmel-5.43-2R(-)::17065259-17066141	dmel-5.43-2R	17065259	17066141	-	dmel-5.43-2R::17047835-17088318	FlyFos019785	51176	17047835	17088318	FlyFos019785[22996-24058]	dmel-5.43-2R(-)[17065324-17065323]		grows	[NGS] validated	fully_covered;no mut;flipped	fully_covered	no mut	flipped	4	12	13	0	0	0							1213189838248655_B12	58519847_32_B_12_22996_24058_dmel-5.43-2R_17065324_17065323
1213189838248655_C06	https://transgeneome.mpi-cbg.de/transgeneomics/public/clone.html?wellId=59026920	FlyFos019707(Oatp58Dc[27188]::S000169_fly_pretag)::2XTY1-SGFP-V5-preTEV-BLRP-3XFLAGdFRT	FBgn0034716	Oatp58Dc	Organic anion transporting polypeptide 58Dc, organic anion transporting polypeptide, OATP, CG3380, oatp 58Dc	dmel-5.43-2R(-)::18111186-18116073	dmel-5.43-2R	18111186	18116073	-	dmel-5.43-2R::18088023-18128868	FlyFos019707	51538	18088023	18128868	FlyFos019707[17559-18621]	dmel-5.43-2R(-)[18111311-18111310]		grows	[NGS] validated	fully_covered;no mut;flipped	fully_covered	no mut	flipped	6	19	25	0	0	0							1213189838248655_C06	58519847_32_C_6_17559_18621_dmel-5.43-2R_18111311_18111310
1213189838248655_C07	https://transgeneome.mpi-cbg.de/transgeneomics/public/clone.html?wellId=59026984	FlyFos019724(CG42494[28730]::S000169_fly_pretag)::2XTY1-SGFP-V5-preTEV-BLRP-3XFLAGdFRT	FBgn0260026	CG42494		dmel-5.43-3L(+)::3184404-3186549	dmel-5.43-3L	3184404	3186549	+	dmel-5.43-3L::3170903-3205569	FlyFos019724	45359	3170903	3205569	FlyFos019724[19101-20163]	dmel-5.43-3L(+)[3186470-3186469]		grows	[NGS] validated	fully_covered;no mut;flipped	fully_covered	no mut	flipped	7	29	34	0	0	0							1213189838248655_C07	58519847_32_C_7_19101_20163_dmel-5.43-3L_3186470_3186469
1213189838248655_C10	https://transgeneome.mpi-cbg.de/transgeneomics/public/clone.html?wellId=59027176	FlyFos019766(CG14020[33786]::S000169_fly_pretag)::2XTY1-SGFP-V5-preTEV-BLRP-3XFLAGdFRT	FBgn0031707	CG14020		dmel-5.43-2L(+)::5517823-5518949	dmel-5.43-2L	5517823	5518949	+	dmel-5.43-2L::5494664-5532136	FlyFos019766	48165	5494664	5532136	FlyFos019766[24157-25219]	dmel-5.43-2L(+)[5494664-5532136]		grows	[NGS] validated	fully_covered;no mut;flipped	fully_covered	no mut	flipped	7	37	31	0	0	0							1213189838248655_C10	58519847_32_C_10_24157_25219_dmel-5.43-2L_5494664_5532136
1213189838248655_C11	https://transgeneome.mpi-cbg.de/transgeneomics/public/clone.html?wellId=59027240	FlyFos019777(CG42329[17344]::S000169_fly_pretag)::2XTY1-SGFP-V5-preTEV-BLRP-3XFLAGdFRT	FBgn0259229	CG42329	CG5156, CG14343, CG5156, CG14343, CT16503	dmel-5.43-2L(+)::1219318-1229802	dmel-5.43-2L	1219318	1229802	+	dmel-5.43-2L::1194184-1237182	FlyFos019777	53691	1194184	1237182	FlyFos019777[7715-8777]	dmel-5.43-2L(+)[1229469-1229468]		grows	[NGS] validated	fully_covered;no mut;flipped	fully_covered	no mut	flipped	29	141	145	0	0	0							1213189838248655_C11	58519847_32_C_11_7715_8777_dmel-5.43-2L_1229469_1229468
1213189838248655_D06	https://transgeneome.mpi-cbg.de/transgeneomics/public/clone.html?wellId=59026928	FlyFos019707(CG30278[33473]::S000169_fly_pretag)::2XTY1-SGFP-V5-preTEV-BLRP-3XFLAGdFRT	FBgn0050278	CG30278	CG3387	dmel-5.43-2R(-)::18105022-18106003	dmel-5.43-2R	18105022	18106003	-	dmel-5.43-2R::18088023-18128868	FlyFos019707	51538	18088023	18128868	FlyFos019707[23844-24906]	dmel-5.43-2R(-)[18105026-18105025]		grows	[NGS] validated	fully_covered;no mut;flipped	fully_covered	no mut	flipped	4	13	30	0	0	0							1213189838248655_D06	58519847_32_D_6_23844_24906_dmel-5.43-2R_18105026_18105025
1213189838248655_D08	https://transgeneome.mpi-cbg.de/transgeneomics/public/clone.html?wellId=59027056	FlyFos019749(CG2010[20070]::S000169_fly_pretag)::2XTY1-SGFP-V5-preTEV-BLRP-3XFLAGdFRT	FBgn0039667	CG2010		dmel-5.43-3R(+)::25320524-25324649	dmel-5.43-3R	25320524	25324649	+	dmel-5.43-3R::25313978-25353321	FlyFos019749	50036	25313978	25353321	FlyFos019749[10441-11503]	dmel-5.43-3R(+)[25313978-25353321]		grows	[NGS] validated	fully_covered;no mut;flipped	fully_covered	no mut	flipped	4	25	10	0	0	0							1213189838248655_D08	58519847_32_D_8_10441_11503_dmel-5.43-3R_25313978_25353321
1213189838248655_D11	https://transgeneome.mpi-cbg.de/transgeneomics/public/clone.html?wellId=59027248	FlyFos019782(grsm[13934]::S000169_fly_pretag)::2XTY1-SGFP-V5-preTEV-BLRP-3XFLAGdFRT	FBgn0040493	grsm	granny smith, lethal (3) c00064, granny smith, aminopeptidase, granny-smith, BcDNA:LD41548, grsm, CG7340, l(3)c00064, granny-smith	dmel-5.43-3R(-)::8775764-8793434	dmel-5.43-3R	8775764	8793434	-	dmel-5.43-3R::8771617-8809353	FlyFos019782	48429	8771617	8809353	FlyFos019782[4305-5367]	dmel-5.43-3R(-)[8771617-8809353]		grows	[NGS] validated	fully_covered;no mut;flipped	fully_covered	no mut	flipped	7	37	36	0	0	0							1213189838248655_D11	58519847_32_D_11_4305_5367_dmel-5.43-3R_8771617_8809353
1213189838248655_D12	https://transgeneome.mpi-cbg.de/transgeneomics/public/clone.html?wellId=59027312	FlyFos019790(CG5715[36461]::S000169_fly_pretag)::2XTY1-SGFP-V5-preTEV-BLRP-3XFLAGdFRT	FBgn0039180	CG5715		dmel-5.43-3R(-)::20119088-20120121	dmel-5.43-3R	20119088	20120121	-	dmel-5.43-3R::20113307-20145982	FlyFos019790	43368	20113307	20145982	FlyFos019790[26832-27894]	dmel-5.43-3R(-)[20119152-20119151]		grows	[NGS] validated	fully_covered;no mut;flipped	fully_covered	no mut	flipped	31	125	117	0	0	0							1213189838248655_D12	58519847_32_D_12_26832_27894_dmel-5.43-3R_20119152_20119151
1213189838248655_E01	https://transgeneome.mpi-cbg.de/transgeneomics/public/clone.html?wellId=59026616	FlyFos019644(Gycalpha99B[19485]::S000169_fly_pretag)::2XTY1-SGFP-V5-preTEV-BLRP-3XFLAGdFRT	FBgn0013972	Gycalpha99B	Guanylyl cyclase alpha-subunit at 99B, Soluble Guanylyl Cyclase alpha, Guanyl cyclase alpha-subunit at 63A, soluble guanylate cyclase, guanylate cyclase 99B, GYCa 99B, CG1912, GCalpha1, SGCalpha, dgc1, Dgcalpha1, Gcalpha1, dgca1, Gycalpha63A, gycalpha, sGC, sGCalpha1, Dgc1, dgcalpha1, Gycalpha-99B	dmel-5.43-3R(+)::25508225-25511480	dmel-5.43-3R	25508225	25511480	+	dmel-5.43-3R::25484967-25521188	FlyFos019644	46914	25484967	25521188	FlyFos019644[9856-10918]	dmel-5.43-3R(+)[25511334-25511333]		grows	[NGS] validated	fully_covered;no mut;flipped	fully_covered	no mut	flipped	6	43	18	0	0	0							1213189838248655_E01	58519847_32_E_1_9856_10918_dmel-5.43-3R_25511334_25511333
1213189838248655_E05	https://transgeneome.mpi-cbg.de/transgeneomics/public/clone.html?wellId=59026872	FlyFos019698(CheB98a[35801]::S000169_fly_pretag)::2XTY1-SGFP-V5-preTEV-BLRP-3XFLAGdFRT	FBgn0261289	CheB98a	Chemosensory protein A 98a, CheB98ap, CG14531, CheB98ap, CG14531	dmel-5.43-3R(+)::24632448-24633155	dmel-5.43-3R	24632448	24633155	+	dmel-5.43-3R::24606982-24647824	FlyFos019698	51535	24606982	24647824	FlyFos019698[26172-27234]	dmel-5.43-3R(+)[24606982-24647824]		grows	[NGS] validated	fully_covered;no mut;flipped	fully_covered	no mut	flipped	29	130	128	0	0	0							1213189838248655_E05	58519847_32_E_5_26172_27234_dmel-5.43-3R_24606982_24647824
1213189838248655_E07	https://transgeneome.mpi-cbg.de/transgeneomics/public/clone.html?wellId=59027000	FlyFos019737(aay[36381]::S000169_fly_pretag)::2XTY1-SGFP-V5-preTEV-BLRP-3XFLAGdFRT	FBgn0023129	aay	astray, 3-phosphoserine phosphatase, Astray, CG3705, anon-WO0172774.117, 0423/14	dmel-5.43-3L(+)::9416353-9417904	dmel-5.43-3L	9416353	9417904	+	dmel-5.43-3L::9390709-9426301	FlyFos019737	46285	9390709	9426301	FlyFos019737[26752-27814]	dmel-5.43-3L(+)[9390709-9426301]		grows	[NGS] validated	fully_covered;no mut;flipped	fully_covered	no mut	flipped	6	29	20	0	0	0							1213189838248655_E07	58519847_32_E_7_26752_27814_dmel-5.43-3L_9390709_9426301
1213189838248655_E11	https://transgeneome.mpi-cbg.de/transgeneomics/public/clone.html?wellId=59027256	FlyFos019782(Cyp304a1[29505]::S000169_fly_pretag)::2XTY1-SGFP-V5-preTEV-BLRP-3XFLAGdFRT	FBgn0038095	Cyp304a1	Cyp304a1, cytochrome P450, CYP304A1-Dm, CG7241, 304a1, BcDNA:LP06355	dmel-5.43-3R(+)::8789519-8791652	dmel-5.43-3R	8789519	8791652	+	dmel-5.43-3R::8771617-8809353	FlyFos019782	48429	8771617	8809353	FlyFos019782[19876-20938]	dmel-5.43-3R(+)[8771617-8809353]		grows	[NGS] validated	fully_covered;no mut;flipped	fully_covered	no mut	flipped	9	34	39	0	0	0							1213189838248655_E11	58519847_32_E_11_19876_20938_dmel-5.43-3R_8771617_8809353
1213189838248655_E12	https://transgeneome.mpi-cbg.de/transgeneomics/public/clone.html?wellId=59027320	FlyFos019792(CG12084[32349]::S000169_fly_pretag)::2XTY1-SGFP-V5-preTEV-BLRP-3XFLAGdFRT	FBgn0043458	CG12084	LD02105, BEST:LD02105	dmel-5.43-3L(-)::1491370-1496667	dmel-5.43-3L	1491370	1496667	-	dmel-5.43-3L::1481145-1514475	FlyFos019792	44023	1481145	1514475	FlyFos019792[22720-23782]	dmel-5.43-3L(-)[1491757-1491756]		grows	[NGS] validated	fully_covered;no mut;flipped	fully_covered	no mut	flipped	7	22	37	0	0	0							1213189838248655_E12	58519847_32_E_12_22720_23782_dmel-5.43-3L_1491757_1491756
1213189838248655_F01	https://transgeneome.mpi-cbg.de/transgeneomics/public/clone.html?wellId=59026624	FlyFos019646(CG9107[25135]::S000169_fly_pretag)::2XTY1-SGFP-V5-preTEV-BLRP-3XFLAGdFRT	FBgn0031764	CG9107	Rrp7	dmel-5.43-2L(-)::6022951-6024545	dmel-5.43-2L	6022951	6024545	-	dmel-5.43-2L::6004503-6039116	FlyFos019646	45306	6004503	6039116	FlyFos019646[15506-16568]	dmel-5.43-2L(-)[6023612-6023611]		grows	[NGS] validated	fully_covered;no mut;flipped	fully_covered	no mut	flipped	6	16	22	0	0	0							1213189838248655_F01	58519847_32_F_1_15506_16568_dmel-5.43-2L_6023612_6023611
1213189838248655_F03	https://transgeneome.mpi-cbg.de/transgeneomics/public/clone.html?wellId=59026752	FlyFos019676(Atg4[28740]::S000169_fly_pretag)::2XTY1-SGFP-V5-preTEV-BLRP-3XFLAGdFRT	FBgn0031298	Atg4	Autophagy-specific gene 4, atg4, CG4428	dmel-5.43-2L(+)::1080913-1083378	dmel-5.43-2L	1080913	1083378	+	dmel-5.43-2L::1063759-1097021	FlyFos019676	43955	1063759	1097021	FlyFos019676[19111-20173]	dmel-5.43-2L(+)[1063759-1097021]		grows	[NGS] validated	fully_covered;no mut;flipped	fully_covered	no mut	flipped	8	45	34	0	0	0							1213189838248655_F03	58519847_32_F_3_19111_20173_dmel-5.43-2L_1063759_1097021
1213189838248655_F10	https://transgeneome.mpi-cbg.de/transgeneomics/public/clone.html?wellId=59027200	FlyFos019770(CG15460[28705]::S000169_fly_pretag)::2XTY1-SGFP-V5-preTEV-BLRP-3XFLAGdFRT	FBgn0031104	CG15460		dmel-5.43-X(-)::20261123-20261833	dmel-5.43-X	20261123	20261833	-	dmel-5.43-X::20242145-20280076	FlyFos019770	48624	20242145	20280076	FlyFos019770[19076-20138]	dmel-5.43-X(-)[20242145-20280076]		grows	[NGS] validated	fully_covered;no mut;flipped	fully_covered	no mut	flipped	9	33	26	0	0	0							1213189838248655_F10	58519847_32_F_10_19076_20138_dmel-5.43-X_20242145_20280076
1213189838248655_G01	https://transgeneome.mpi-cbg.de/transgeneomics/public/clone.html?wellId=59026632	FlyFos019648(Spt20[30633]::S000169_fly_pretag)::2XTY1-SGFP-V5-preTEV-BLRP-3XFLAGdFRT	FBgn0036374	Spt20	Spt20, CG17689	dmel-5.43-3L(+)::13495840-13503795	dmel-5.43-3L	13495840	13503795	+	dmel-5.43-3L::13481893-13513045	FlyFos019648	41845	13481893	13513045	FlyFos019648[21004-22066]	dmel-5.43-3L(+)[13481893-13513045]		grows	[NGS] validated	fully_covered;no mut;flipped	fully_covered	no mut	flipped	10	46	53	0	0	0							1213189838248655_G01	58519847_32_G_1_21004_22066_dmel-5.43-3L_13481893_13513045
1213189838248655_G02	https://transgeneome.mpi-cbg.de/transgeneomics/public/clone.html?wellId=59026696	FlyFos019660(CG17202[25562]::S000169_fly_pretag)::2XTY1-SGFP-V5-preTEV-BLRP-3XFLAGdFRT	FBgn0038043	CG17202	BcDNA:RH21090	dmel-5.43-3R(+)::8248490-8249328	dmel-5.43-3R	8248490	8249328	+	dmel-5.43-3R::8233814-8265117	FlyFos019660	41996	8233814	8265117	FlyFos019660[15933-16995]	dmel-5.43-3R(+)[8249186-8249185]		grows	[NGS] validated	fully_covered;no mut;flipped	fully_covered	no mut	flipped	8	33	36	0	0	0							1213189838248655_G02	58519847_32_G_2_15933_16995_dmel-5.43-3R_8249186_8249185
1213189838248655_G08	https://transgeneome.mpi-cbg.de/transgeneomics/public/clone.html?wellId=59027080	FlyFos019750(CG14743[15497]::S000169_fly_pretag)::2XTY1-SGFP-V5-preTEV-BLRP-3XFLAGdFRT	FBgn0033326	CG14743		dmel-5.43-2R(-)::4597903-4600418	dmel-5.43-2R	4597903	4600418	-	dmel-5.43-2R::4592039-4614334	FlyFos019750	32988	4592039	4614334	FlyFos019750[5868-6930]	dmel-5.43-2R(-)[4592039-4614334]		grows	[NGS] validated	fully_covered;no mut;flipped	fully_covered	no mut	flipped	10	45	66	0	0	0							1213189838248655_G08	58519847_32_G_8_5868_6930_dmel-5.43-2R_4592039_4614334
1213189838248655_H02	https://transgeneome.mpi-cbg.de/transgeneomics/public/clone.html?wellId=59026704	FlyFos019662(CG43151[33280]::S000169_fly_pretag)::2XTY1-SGFP-V5-preTEV-BLRP-3XFLAGdFRT	FBgn0262681	CG43151		dmel-5.43-3L(-)::157818-158211	dmel-5.43-3L	157818	158211	-	dmel-5.43-3L::147511-181637	FlyFos019662	44819	147511	181637	FlyFos019662[23651-24713]	dmel-5.43-3L(-)[157988-157987]		grows	[NGS] validated	fully_covered;no mut;flipped	fully_covered	no mut	flipped	10	34	45	0	0	0							1213189838248655_H02	58519847_32_H_2_23651_24713_dmel-5.43-3L_157988_157987
1213189838248655_H04	https://transgeneome.mpi-cbg.de/transgeneomics/public/clone.html?wellId=59026832	FlyFos019695(CG9996[22951]::S000169_fly_pretag)::2XTY1-SGFP-V5-preTEV-BLRP-3XFLAGdFRT	FBgn0039273	CG9996		dmel-5.43-3R(-)::20898451-20900329	dmel-5.43-3R	20898451	20900329	-	dmel-5.43-3R::20885294-20928626	FlyFos019695	54025	20885294	20928626	FlyFos019695[13322-14384]	dmel-5.43-3R(-)[20885294-20928626]		grows	[NGS] validated	fully_covered;no mut;flipped	fully_covered	no mut	flipped	7	25	40	0	0	0							1213189838248655_H04	58519847_32_H_4_13322_14384_dmel-5.43-3R_20885294_20928626
1213189838248655_H05	https://transgeneome.mpi-cbg.de/transgeneomics/public/clone.html?wellId=59026896	FlyFos019703(CG10357[13417]::S000169_fly_pretag)::2XTY1-SGFP-V5-preTEV-BLRP-3XFLAGdFRT	FBgn0035453	CG10357		dmel-5.43-3L(+)::3615382-3616682	dmel-5.43-3L	3615382	3616682	+	dmel-5.43-3L::3581990-3620333	FlyFos019703	49036	3581990	3620333	FlyFos019703[3788-4850]	dmel-5.43-3L(+)[3616547-3616546]		grows	[NGS] validated	fully_covered;no mut;flipped	fully_covered	no mut	flipped	6	26	41	0	0	0							1213189838248655_H05	58519847_32_H_5_3788_4850_dmel-5.43-3L_3616547_3616546
1213189838248655_H08	https://transgeneome.mpi-cbg.de/transgeneomics/public/clone.html?wellId=59027088	FlyFos019750(PGRP-SC2[22615]::S000169_fly_pretag)::2XTY1-SGFP-V5-preTEV-BLRP-3XFLAGdFRT	FBgn0043575	PGRP-SC2	PGRP-SC2, Peptidoglycan-recognition protein-SC2 precursor, PGRP-SC, CG14745, CG14745 PGRP	dmel-5.43-2R(+)::4604472-4605026	dmel-5.43-2R	4604472	4605026	+	dmel-5.43-2R::4592039-4614334	FlyFos019750	32988	4592039	4614334	FlyFos019750[12986-14048]	dmel-5.43-2R(+)[4592039-4614334]		grows	[NGS] validated	fully_covered;no mut;flipped	fully_covered	no mut	flipped	21	103	63	0	0	0							1213189838248655_H08	58519847_32_H_8_12986_14048_dmel-5.43-2R_4592039_4614334
1213189838248655_H09	https://transgeneome.mpi-cbg.de/transgeneomics/public/clone.html?wellId=59027152	FlyFos019761(CG7609[31583]::S000169_fly_pretag)::2XTY1-SGFP-V5-preTEV-BLRP-3XFLAGdFRT	FBgn0027518	CG7609	BcDNA:LD21720	dmel-5.43-3R(-)::25567694-25570790	dmel-5.43-3R	25567694	25570790	-	dmel-5.43-3R::25554064-25589924	FlyFos019761	46553	25554064	25589924	FlyFos019761[21954-23016]	dmel-5.43-3R(-)[25567972-25567971]		grows	[NGS] validated	fully_covered;no mut;flipped	fully_covered	no mut	flipped	7	21	37	0	0	0							1213189838248655_H09	58519847_32_H_9_21954_23016_dmel-5.43-3R_25567972_25567971
1213189838248655_H11	https://transgeneome.mpi-cbg.de/transgeneomics/public/clone.html?wellId=59027280	FlyFos019785(LSm1[40376]::S000169_fly_pretag)::2XTY1-SGFP-V5-preTEV-BLRP-3XFLAGdFRT	FBgn0261067	LSm1	CG4279, Lsm1, CG4279	dmel-5.43-2R(-)::17057474-17058150	dmel-5.43-2R	17057474	17058150	-	dmel-5.43-2R::17047835-17088318	FlyFos019785	51176	17047835	17088318	FlyFos019785[30747-31809]	dmel-5.43-2R(-)[17057573-17057572]		grows	[NGS] validated	fully_covered;no mut;flipped	fully_covered	no mut	flipped	7	31	23	0	0	0							1213189838248655_H11	58519847_32_H_11_30747_31809_dmel-5.43-2R_17057573_17057572
1213189838248655_H12	https://transgeneome.mpi-cbg.de/transgeneomics/public/clone.html?wellId=59027344	FlyFos019798(CG15127[35139]::S000169_fly_pretag)::2XTY1-SGFP-V5-preTEV-BLRP-3XFLAGdFRT	FBgn0040730	CG15127	CG18365	dmel-5.43-2R(-)::15568272-15568878	dmel-5.43-2R	15568272	15568878	-	dmel-5.43-2R::15552930-15594035	FlyFos019798	51798	15552930	15594035	FlyFos019798[25510-26572]	dmel-5.43-2R(-)[15568527-15568526]		grows	[NGS] validated	fully_covered;no mut;flipped	fully_covered	no mut	flipped	4	15	21	0	0	0							1213189838248655_H12	58519847_32_H_12_25510_26572_dmel-5.43-2R_15568527_15568526
1367792136965469_A02	https://transgeneome.mpi-cbg.de/transgeneomics/public/clone.html?wellId=59041868	FlyFos022999(decay[22813]::S000169_fly_pretag)::2XTY1-SGFP-V5-preTEV-BLRP-3XFLAGdFRT	FBgn0028381	decay	death executioner caspase related to Apopain/Yama, caspase-3 protein, Caspase-3, Decay, decay, caspase-3, Caspase 3, caspase 3, Cleaved Caspase 3, Caspase-3, Cas3, Decay, Casp 3, DECAY, caspase-3, caspase 3, Casp3, CC3, Drosophila executioner caspase related to Apopain/Yama, CG14902	dmel-5.43-3R(-)::12324780-12327394	dmel-5.43-3R	12324780	12327394	-	dmel-5.43-3R::12311737-12344332	FlyFos022999	43288	12311737	12344332	FlyFos022999[13184-14246]	dmel-5.43-3R(-)[12311737-12344332]		grows	[NGS] validated	fully_covered;no mut;flipped	fully_covered	no mut	flipped	41	181	241	0	0	0							1367792136965469_A02	58519847_52_A_2_13184_14246_dmel-5.43-3R_12311737_12344332
1367792136965469_A03	https://transgeneome.mpi-cbg.de/transgeneomics/public/clone.html?wellId=59041932	FlyFos023023(CG7324[19531]::S000169_fly_pretag)::2XTY1-SGFP-V5-preTEV-BLRP-3XFLAGdFRT	FBgn0037074	CG7324		dmel-5.43-3L(-)::21330780-21336816	dmel-5.43-3L	21330780	21336816	-	dmel-5.43-3L::21321555-21353419	FlyFos023023	42557	21321555	21353419	FlyFos023023[9902-10964]	dmel-5.43-3L(-)[21321555-21353419]		grows	[NGS] validated	fully_covered;no mut;flipped	fully_covered	no mut	flipped	4	16	23	0	0	0							1367792136965469_A03	58519847_52_A_3_9902_10964_dmel-5.43-3L_21321555_21353419
1367792136965469_A05	https://transgeneome.mpi-cbg.de/transgeneomics/public/clone.html?wellId=59042060	FlyFos023055(wee[24179]::S000169_fly_pretag)::2XTY1-SGFP-V5-preTEV-BLRP-3XFLAGdFRT	FBgn0011737	wee	wee, Wee1, dWee1, dwee1, Wee 1, Wee, Dwee, WEE1, wee1, Dwee1, CG4488	dmel-5.43-2L(-)::6911338-6914137	dmel-5.43-2L	6911338	6914137	-	dmel-5.43-2L::6890633-6926252	FlyFos023055	46312	6890633	6926252	FlyFos023055[14550-15612]	dmel-5.43-2L(-)[6911704-6911703]		grows	[NGS] validated	fully_covered;no mut;flipped	fully_covered	no mut	flipped	38	154	172	0	0	0							1367792136965469_A05	58519847_52_A_5_14550_15612_dmel-5.43-2L_6911704_6911703
1367792136965469_A06	https://transgeneome.mpi-cbg.de/transgeneomics/public/clone.html?wellId=59042124	FlyFos023071(CG17856[33794]::S000169_fly_pretag)::2XTY1-SGFP-V5-preTEV-BLRP-3XFLAGdFRT	FBgn0039576	CG17856	Ubiquinol-cytochrome c reductase 14 kDa protein	dmel-5.43-3R(+)::24119826-24120272	dmel-5.43-3R	24119826	24120272	+	dmel-5.43-3R::24096025-24134497	FlyFos023071	49165	24096025	24134497	FlyFos023071[24165-25227]	dmel-5.43-3R(+)[24096025-24134497]		grows	[NGS] validated	fully_covered;no mut;flipped	fully_covered	no mut	flipped	10	39	63	0	0	0							1367792136965469_A06	58519847_52_A_6_24165_25227_dmel-5.43-3R_24096025_24134497
1367792136965469_A07	https://transgeneome.mpi-cbg.de/transgeneomics/public/clone.html?wellId=59042188	FlyFos023085(CG33783[40049]::S000169_fly_pretag)::2XTY1-SGFP-V5-preTEV-BLRP-3XFLAGdFRT	FBgn0053783	CG33783		dmel-5.43-3R(+)::5892492-5893289	dmel-5.43-3R	5892492	5893289	+	dmel-5.43-3R::5862868-5901493	FlyFos023085	49318	5862868	5901493	FlyFos023085[30420-31482]	dmel-5.43-3R(+)[5862868-5901493]		grows	[NGS] validated	fully_covered;no mut;flipped	fully_covered	no mut	flipped	19	94	86	0	0	0							1367792136965469_A07	58519847_52_A_7_30420_31482_dmel-5.43-3R_5862868_5901493
1367792136965469_A09	https://transgeneome.mpi-cbg.de/transgeneomics/public/clone.html?wellId=59042316	FlyFos023099(CG4749[24673]::S000169_fly_pretag)::2XTY1-SGFP-V5-preTEV-BLRP-3XFLAGdFRT	FBgn0031308	CG4749	anon-WO0118547.81	dmel-5.43-2L(+)::1147833-1149454	dmel-5.43-2L	1147833	1149454	+	dmel-5.43-2L::1134331-1170473	FlyFos023099	46835	1134331	1170473	FlyFos023099[15044-16106]	dmel-5.43-2L(+)[1134331-1170473]		grows	[NGS] validated	fully_covered;no mut;flipped	fully_covered	no mut	flipped	10	54	35	0	0	0							1367792136965469_A09	58519847_52_A_9_15044_16106_dmel-5.43-2L_1134331_1170473
1367792136965469_A10	https://transgeneome.mpi-cbg.de/transgeneomics/public/clone.html?wellId=59042380	FlyFos023109(CG11475[22318]::S000169_fly_pretag)::2XTY1-SGFP-V5-preTEV-BLRP-3XFLAGdFRT	FBgn0034687	CG11475		dmel-5.43-2R(-)::17957230-17958791	dmel-5.43-2R	17957230	17958791	-	dmel-5.43-2R::17944605-17981769	FlyFos023109	47857	17944605	17981769	FlyFos023109[12689-13751]	dmel-5.43-2R(-)[17944605-17981769]		grows	[NGS] validated	fully_covered;no mut;flipped	fully_covered	no mut	flipped	30	118	171	0	0	0							1367792136965469_A10	58519847_52_A_10_12689_13751_dmel-5.43-2R_17944605_17981769
1367792136965469_B01	https://transgeneome.mpi-cbg.de/transgeneomics/public/clone.html?wellId=59041812	FlyFos022991(CG10338[17976]::S000169_fly_pretag)::2XTY1-SGFP-V5-preTEV-BLRP-3XFLAGdFRT	FBgn0032700	CG10338		dmel-5.43-2L(+)::18695733-18698571	dmel-5.43-2L	18695733	18698571	+	dmel-5.43-2L::18689537-18727795	FlyFos022991	48951	18689537	18727795	FlyFos022991[8347-9409]	dmel-5.43-2L(+)[18689537-18727795]		grows	[NGS] validated	fully_covered;no mut;flipped	fully_covered	no mut	flipped	31	142	138	0	0	0							1367792136965469_B01	58519847_52_B_1_8347_9409_dmel-5.43-2L_18689537_18727795
1367792136965469_B02	https://transgeneome.mpi-cbg.de/transgeneomics/public/clone.html?wellId=59041876	FlyFos022999(Gr89a[21435]::S000169_fly_pretag)::2XTY1-SGFP-V5-preTEV-BLRP-3XFLAGdFRT	FBgn0038440	Gr89a	Gustatory receptor 89a, CG14901	dmel-5.43-3R(-)::12323539-12324681	dmel-5.43-3R	12323539	12324681	-	dmel-5.43-3R::12311737-12344332	FlyFos022999	43288	12311737	12344332	FlyFos022999[11806-12868]	dmel-5.43-3R(-)[12311737-12344332]		grows	[NGS] validated	fully_covered;no mut;flipped	fully_covered	no mut	flipped	35	176	189	0	0	0							1367792136965469_B02	58519847_52_B_2_11806_12868_dmel-5.43-3R_12311737_12344332
1367792136965469_B04	https://transgeneome.mpi-cbg.de/transgeneomics/public/clone.html?wellId=59042004	FlyFos023034(Ir56c[38197]::S000169_fly_pretag)::2XTY1-SGFP-V5-preTEV-BLRP-3XFLAGdFRT	FBgn0034457	Ir56c	Ionotropic receptor 56c, ionotropic receptor 56c, CG15122, IR56c, CG15122	dmel-5.43-2R(+)::15397273-15398976	dmel-5.43-2R	15397273	15398976	+	dmel-5.43-2R::15370407-15407315	FlyFos023034	47601	15370407	15407315	FlyFos023034[28568-29630]	dmel-5.43-2R(+)[15370407-15407315]		grows	[NGS] validated	fully_covered;no mut;flipped	fully_covered	no mut	flipped	19	98	58	0	0	0							1367792136965469_B04	58519847_52_B_4_28568_29630_dmel-5.43-2R_15370407_15407315
1367792136965469_B05	https://transgeneome.mpi-cbg.de/transgeneomics/public/clone.html?wellId=59042068	FlyFos023055(CG13773[28962]::S000169_fly_pretag)::2XTY1-SGFP-V5-preTEV-BLRP-3XFLAGdFRT	FBgn0042092	CG13773	BEST:GH23590	dmel-5.43-2L(-)::6906918-6907834	dmel-5.43-2L	6906918	6907834	-	dmel-5.43-2L::6890633-6926252	FlyFos023055	46312	6890633	6926252	FlyFos023055[19333-20395]	dmel-5.43-2L(-)[6906921-6906920]		grows	[NGS] validated	fully_covered;no mut;flipped	fully_covered	no mut	flipped	7	26	90	0	0	0							1367792136965469_B05	58519847_52_B_5_19333_20395_dmel-5.43-2L_6906921_6906920
1367792136965469_B07	https://transgeneome.mpi-cbg.de/transgeneomics/public/clone.html?wellId=59042196	FlyFos023089(m6[29949]::S000169_fly_pretag)::2XTY1-SGFP-V5-preTEV-BLRP-3XFLAGdFRT	FBgn0002632	m6	E(spl) region transcript m6, Enhancer of Split Region Transcript m6, Enhancer of split region transcript m6, CG8354, DmelCG8354, M6, E(spl)m6, HLHm6, E(spl)M6	dmel-5.43-3R(+)::21858633-21859769	dmel-5.43-3R	21858633	21859769	+	dmel-5.43-3R::21838597-21870106	FlyFos023089	42202	21838597	21870106	FlyFos023089[20320-21382]	dmel-5.43-3R(+)[21838597-21870106]		grows	[NGS] validated	fully_covered;no mut;flipped	fully_covered	no mut	flipped	33	169	129	0	0	0							1367792136965469_B07	58519847_52_B_7_20320_21382_dmel-5.43-3R_21838597_21870106
1367792136965469_B08	https://transgeneome.mpi-cbg.de/transgeneomics/public/clone.html?wellId=59042260	FlyFos023094(Rab7[37736]::S000169_fly_pretag)::2XTY1-SGFP-V5-preTEV-BLRP-3XFLAGdFRT	FBgn0015795	Rab7	Rab-protein 7, Rab-r7, RAB7, AAF56218, Rab-7, rab7, CG5915, DmRab7, DRab7, Drab7, Dm Rab7, DRAB7	dmel-5.43-3R(+)::19818734-19821174	dmel-5.43-3R	19818734	19821174	+	dmel-5.43-3R::19792364-19827112	FlyFos023094	45441	19792364	19827112	FlyFos023094[28107-29169]	dmel-5.43-3R(+)[19792364-19827112]		grows	[NGS] validated	fully_covered;no mut;flipped	fully_covered	no mut	flipped	25	153	117	0	0	0							1367792136965469_B08	58519847_52_B_8_28107_29169_dmel-5.43-3R_19792364_19827112
1367792136965469_B10	https://transgeneome.mpi-cbg.de/transgeneomics/public/clone.html?wellId=59042388	FlyFos023109(CG2921[26128]::S000169_fly_pretag)::2XTY1-SGFP-V5-preTEV-BLRP-3XFLAGdFRT	FBgn0034689	CG2921		dmel-5.43-2R(-)::17961043-17962842	dmel-5.43-2R	17961043	17962842	-	dmel-5.43-2R::17944605-17981769	FlyFos023109	47857	17944605	17981769	FlyFos023109[16499-17561]	dmel-5.43-2R(-)[17944605-17981769]		grows	[NGS] validated	fully_covered;no mut;flipped	fully_covered	no mut	flipped	23	111	88	0	0	0							1367792136965469_B10	58519847_52_B_10_16499_17561_dmel-5.43-2R_17944605_17981769
1367792136965469_B12	https://transgeneome.mpi-cbg.de/transgeneomics/public/clone.html?wellId=59042516	FlyFos023127(Vha16-4[39517]::S000169_fly_pretag)::2XTY1-SGFP-V5-preTEV-BLRP-3XFLAGdFRT	FBgn0262513	Vha16-4	Vacuolar H[+] ATPase subunit 16-4, Vha16-4, vha16-4, V-ATPase, CG9013	dmel-5.43-2R(-)::12835163-12835729	dmel-5.43-2R	12835163	12835729	-	dmel-5.43-2R::12825422-12865105	FlyFos023127	50376	12825422	12865105	FlyFos023127[29888-30950]	dmel-5.43-2R(-)[12835219-12835218]		grows	[NGS] validated	fully_covered;no mut;flipped	fully_covered	no mut	flipped	19	108	91	0	0	0							1367792136965469_B12	58519847_52_B_12_29888_30950_dmel-5.43-2R_12835219_12835218
1367792136965469_C01	https://transgeneome.mpi-cbg.de/transgeneomics/public/clone.html?wellId=59041820	FlyFos022991(Grip71[31145]::S000169_fly_pretag)::2XTY1-SGFP-V5-preTEV-BLRP-3XFLAGdFRT	FBgn0032705	Grip71	Grip71, Dgp71WD, Dgrip71, CG10346, Grip71wd	dmel-5.43-2L(+)::18708849-18711297	dmel-5.43-2L	18708849	18711297	+	dmel-5.43-2L::18689537-18727795	FlyFos022991	48951	18689537	18727795	FlyFos022991[21516-22578]	dmel-5.43-2L(+)[18689537-18727795]		grows	[NGS] validated	fully_covered;no mut;flipped	fully_covered	no mut	flipped	32	169	121	0	0	0							1367792136965469_C01	58519847_52_C_1_21516_22578_dmel-5.43-2L_18689537_18727795
1367792136965469_C02	https://transgeneome.mpi-cbg.de/transgeneomics/public/clone.html?wellId=59041884	FlyFos023000(CG14693[24092]::S000169_fly_pretag)::2XTY1-SGFP-V5-preTEV-BLRP-3XFLAGdFRT	FBgn0037837	CG14693		dmel-5.43-3R(-)::6637303-6640769	dmel-5.43-3R	6637303	6640769	-	dmel-5.43-3R::6623102-6659370	FlyFos023000	46961	6623102	6659370	FlyFos023000[14463-15525]	dmel-5.43-3R(-)[6623102-6659370]		grows	[NGS] validated	fully_covered;no mut;flipped	fully_covered	no mut	flipped	23	77	132	0	0	0							1367792136965469_C02	58519847_52_C_2_14463_15525_dmel-5.43-3R_6623102_6659370
1367792136965469_C03	https://transgeneome.mpi-cbg.de/transgeneomics/public/clone.html?wellId=59041948	FlyFos023023(ebd2[26216]::S000169_fly_pretag)::2XTY1-SGFP-V5-preTEV-BLRP-3XFLAGdFRT	FBgn0037076	ebd2	earthbound 2, CG12972	dmel-5.43-3L(-)::21337868-21342388	dmel-5.43-3L	21337868	21342388	-	dmel-5.43-3L::21321555-21353419	FlyFos023023	42557	21321555	21353419	FlyFos023023[16587-17649]	dmel-5.43-3L(-)[21321555-21353419]		grows	[NGS] validated	fully_covered;no mut;flipped	fully_covered	no mut	flipped	41	178	217	0	0	0							1367792136965469_C03	58519847_52_C_3_16587_17649_dmel-5.43-3L_21321555_21353419
1367792136965469_C04	https://transgeneome.mpi-cbg.de/transgeneomics/public/clone.html?wellId=59042012	FlyFos023035(CG40053[31412]::S000169_fly_pretag)::2XTY1-SGFP-V5-preTEV-BLRP-3XFLAGdFRT	FBgn0058053	CG40053	BcDNA:AT11374	dmel-5.43-3L(-)::24003031-24004463	dmel-5.43-3L	24003031	24004463	-	dmel-5.43-3L::23986064-24025266	FlyFos023035	49895	23986064	24025266	FlyFos023035[21783-22845]	dmel-5.43-3L(-)[24003485-24003484]		grows	[NGS] validated	fully_covered;no mut;flipped	fully_covered	no mut	flipped	26	171	90	0	0	0							1367792136965469_C04	58519847_52_C_4_21783_22845_dmel-5.43-3L_24003485_24003484
1367792136965469_C05	https://transgeneome.mpi-cbg.de/transgeneomics/public/clone.html?wellId=59042076	FlyFos023059(CG30039[19945]::S000169_fly_pretag)::2XTY1-SGFP-V5-preTEV-BLRP-3XFLAGdFRT	FBgn0050039	CG30039	NEST:bs25c07, BcDNA:AT09538, NEST:bs15e10	dmel-5.43-2R(-)::7938480-7939260	dmel-5.43-2R	7938480	7939260	-	dmel-5.43-2R::7928325-7963671	FlyFos023059	46039	7928325	7963671	FlyFos023059[10316-11378]	dmel-5.43-2R(-)[7928325-7963671]		grows	[NGS] validated	fully_covered;no mut;flipped	fully_covered	no mut	flipped	31	171	175	0	0	0							1367792136965469_C05	58519847_52_C_5_10316_11378_dmel-5.43-2R_7928325_7963671
1367792136965469_C06	https://transgeneome.mpi-cbg.de/transgeneomics/public/clone.html?wellId=59042140	FlyFos023079(CG11588[19134]::S000169_fly_pretag)::2XTY1-SGFP-V5-preTEV-BLRP-3XFLAGdFRT	FBgn0036221	CG11588		dmel-5.43-3L(+)::11914666-11915551	dmel-5.43-3L	11914666	11915551	+	dmel-5.43-3L::11889920-11925029	FlyFos023079	45802	11889920	11925029	FlyFos023079[9505-10567]	dmel-5.43-3L(+)[11915526-11915525]		grows	[NGS] validated	fully_covered;no mut;flipped	fully_covered	no mut	flipped	27	185	101	0	0	0							1367792136965469_C06	58519847_52_C_6_9505_10567_dmel-5.43-3L_11915526_11915525
1367792136965469_C07	https://transgeneome.mpi-cbg.de/transgeneomics/public/clone.html?wellId=59042204	FlyFos023089(m4[20793]::S000169_fly_pretag)::2XTY1-SGFP-V5-preTEV-BLRP-3XFLAGdFRT	FBgn0002629	m4	E(spl) region transcript m4, DmelCG6099, HLHm4, E(spl)m4, CG6099	dmel-5.43-3R(-)::21849548-21850280	dmel-5.43-3R	21849548	21850280	-	dmel-5.43-3R::21838597-21870106	FlyFos023089	42202	21838597	21870106	FlyFos023089[11164-12226]	dmel-5.43-3R(-)[21838597-21870106]		grows	[NGS] validated	fully_covered;no mut;flipped	fully_covered	no mut	flipped	11	54	66	0	0	0							1367792136965469_C07	58519847_52_C_7_11164_12226_dmel-5.43-3R_21838597_21870106
1367792136965469_C08	https://transgeneome.mpi-cbg.de/transgeneomics/public/clone.html?wellId=59042268	FlyFos023094(CG33108[40480]::S000169_fly_pretag)::2XTY1-SGFP-V5-preTEV-BLRP-3XFLAGdFRT	FBgn0053108	CG33108	CG5926, BcDNA:RE26840	dmel-5.43-3R(+)::19821392-19823266	dmel-5.43-3R	19821392	19823266	+	dmel-5.43-3R::19792364-19827112	FlyFos023094	45441	19792364	19827112	FlyFos023094[30851-31913]	dmel-5.43-3R(+)[19792364-19827112]		grows	[NGS] validated	fully_covered;no mut;flipped	fully_covered	no mut	flipped	13	93	99	0	0	0							1367792136965469_C08	58519847_52_C_8_30851_31913_dmel-5.43-3R_19792364_19827112
1367792136965469_C09	https://transgeneome.mpi-cbg.de/transgeneomics/public/clone.html?wellId=59042332	FlyFos023102(Golgin84[36120]::S000169_fly_pretag)::2XTY1-SGFP-V5-preTEV-BLRP-3XFLAGdFRT	FBgn0039188	Golgin84	Golgin84, CG17785, golgin	dmel-5.43-3R(-)::20181792-20183645	dmel-5.43-3R	20181792	20183645	-	dmel-5.43-3R::20169226-20208485	FlyFos023102	49952	20169226	20208485	FlyFos023102[26491-27553]	dmel-5.43-3R(-)[20181996-20181995]		grows	[NGS] validated	fully_covered;no mut;flipped	fully_covered	no mut	flipped	32	131	187	0	0	0							1367792136965469_C09	58519847_52_C_9_26491_27553_dmel-5.43-3R_20181996_20181995
1367792136965469_C10	https://transgeneome.mpi-cbg.de/transgeneomics/public/clone.html?wellId=59042396	FlyFos023109(CG11474[24089]::S000169_fly_pretag)::2XTY1-SGFP-V5-preTEV-BLRP-3XFLAGdFRT	FBgn0034688	CG11474		dmel-5.43-2R(-)::17958739-17960948	dmel-5.43-2R	17958739	17960948	-	dmel-5.43-2R::17944605-17981769	FlyFos023109	47857	17944605	17981769	FlyFos023109[14460-15522]	dmel-5.43-2R(-)[17944605-17981769]		grows	[NGS] validated	fully_covered;no mut;flipped	fully_covered	no mut	flipped	26	106	115	0	0	0							1367792136965469_C10	58519847_52_C_10_14460_15522_dmel-5.43-2R_17944605_17981769
1367792136965469_C11	https://transgeneome.mpi-cbg.de/transgeneomics/public/clone.html?wellId=59042460	FlyFos023122(CG31560[23751]::S000169_fly_pretag)::2XTY1-SGFP-V5-preTEV-BLRP-3XFLAGdFRT	FBgn0051560	CG31560	CG10314	dmel-5.43-3R(+)::2135718-2136612	dmel-5.43-3R	2135718	2136612	+	dmel-5.43-3R::2108583-2150730	FlyFos023122	52840	2108583	2150730	FlyFos023122[14122-15184]	dmel-5.43-3R(+)[2136610-2136609]		grows	[NGS] validated	fully_covered;no mut;flipped	fully_covered	no mut	flipped	24	155	152	0	0	0							1367792136965469_C11	58519847_52_C_11_14122_15184_dmel-5.43-3R_2136610_2136609
1367792136965469_D01	https://transgeneome.mpi-cbg.de/transgeneomics/public/clone.html?wellId=59041828	FlyFos022991(CG10343[24427]::S000169_fly_pretag)::2XTY1-SGFP-V5-preTEV-BLRP-3XFLAGdFRT	FBgn0032703	CG10343	anon-WO0118547.123	dmel-5.43-2L(+)::18703467-18704457	dmel-5.43-2L	18703467	18704457	+	dmel-5.43-2L::18689537-18727795	FlyFos022991	48951	18689537	18727795	FlyFos022991[14798-15860]	dmel-5.43-2L(+)[18689537-18727795]		grows	[NGS] validated	fully_covered;no mut;flipped	fully_covered	no mut	flipped	25	113	115	0	0	0							1367792136965469_D01	58519847_52_D_1_14798_15860_dmel-5.43-2L_18689537_18727795
1367792136965469_D02	https://transgeneome.mpi-cbg.de/transgeneomics/public/clone.html?wellId=59041892	FlyFos023001(Nc73EF[26107]::S000169_fly_pretag)::2XTY1-SGFP-V5-preTEV-BLRP-3XFLAGdFRT	FBgn0010352	Nc73EF	Neural conserved at 73EF, Neural conserved at 73KF, alpha-ketoglutarate dehydrogenase E1 subunit, anon-WO0118547.329, 141810_at, FBgn0036682, CG11661, E1	dmel-5.43-3L(+)::16948605-16961180	dmel-5.43-3L	16948605	16961180	+	dmel-5.43-3L::16944102-16977550	FlyFos023001	44141	16944102	16977550	FlyFos023001[16478-17540]	dmel-5.43-3L(+)[16944102-16977550]		grows	[NGS] validated	fully_covered;no mut;flipped	fully_covered	no mut	flipped	27	153	122	0	0	0							1367792136965469_D02	58519847_52_D_2_16478_17540_dmel-5.43-3L_16944102_16977550
1367792136965469_D03	https://transgeneome.mpi-cbg.de/transgeneomics/public/clone.html?wellId=59041956	FlyFos023023(CG32436[36104]::S000169_fly_pretag)::2XTY1-SGFP-V5-preTEV-BLRP-3XFLAGdFRT	FBgn0052436	CG32436	CG12973, HD35012, CG6968	dmel-5.43-3L(+)::21337133-21348149	dmel-5.43-3L	21337133	21348149	+	dmel-5.43-3L::21321555-21353419	FlyFos023023	42557	21321555	21353419	FlyFos023023[26475-27537]	dmel-5.43-3L(+)[21321555-21353419]		grows	[NGS] validated	fully_covered;no mut;flipped	fully_covered	no mut	flipped	35	168	179	0	0	0							1367792136965469_D03	58519847_52_D_3_26475_27537_dmel-5.43-3L_21321555_21353419
1367792136965469_D04	https://transgeneome.mpi-cbg.de/transgeneomics/public/clone.html?wellId=59042020	FlyFos023040(CG30334[42152]::S000169_fly_pretag)::2XTY1-SGFP-V5-preTEV-BLRP-3XFLAGdFRT	FBgn0050334	CG30334	NEST:bs09a11	dmel-5.43-2R(-)::8328138-8328825	dmel-5.43-2R	8328138	8328825	-	dmel-5.43-2R::8316844-8360765	FlyFos023040	54614	8316844	8360765	FlyFos023040[32523-33585]	dmel-5.43-2R(-)[8328244-8328243]		grows	[NGS] validated	fully_covered;no mut;flipped	fully_covered	no mut	flipped	4	21	14	0	0	0							1367792136965469_D04	58519847_52_D_4_32523_33585_dmel-5.43-2R_8328244_8328243
1367792136965469_D05	https://transgeneome.mpi-cbg.de/transgeneomics/public/clone.html?wellId=59042084	FlyFos023062(CG43192[14971]::S000169_fly_pretag)::2XTY1-SGFP-V5-preTEV-BLRP-3XFLAGdFRT	FBgn0262821	CG43192	noncoding_6907, noncoding_6564	dmel-5.43-2R(+)::9364847-9365584	dmel-5.43-2R	9364847	9365584	+	dmel-5.43-2R::9338507-9370883	FlyFos023062	43069	9338507	9370883	FlyFos023062[5342-6404]	dmel-5.43-2R(+)[9365543-9365542]		grows	[NGS] validated	fully_covered;no mut;flipped	fully_covered	no mut	flipped	26	147	134	0	0	0							1367792136965469_D05	58519847_52_D_5_5342_6404_dmel-5.43-2R_9365543_9365542
1367792136965469_D08	https://transgeneome.mpi-cbg.de/transgeneomics/public/clone.html?wellId=59042276	FlyFos023095(CG9662[27952]::S000169_fly_pretag)::2XTY1-SGFP-V5-preTEV-BLRP-3XFLAGdFRT	FBgn0031529	CG9662	BcDNA:AT03617	dmel-5.43-2L(-)::3375883-3376686	dmel-5.43-2L	3375883	3376686	-	dmel-5.43-2L::3363941-3394434	FlyFos023095	41186	3363941	3394434	FlyFos023095[18323-19385]	dmel-5.43-2L(-)[3376113-3376112]		grows	[NGS] validated	fully_covered;no mut;flipped	fully_covered	no mut	flipped	30	137	155	0	0	0							1367792136965469_D08	58519847_52_D_8_18323_19385_dmel-5.43-2L_3376113_3376112
1367792136965469_D09	https://transgeneome.mpi-cbg.de/transgeneomics/public/clone.html?wellId=59042340	FlyFos023102(CG33341[23002]::S000169_fly_pretag)::2XTY1-SGFP-V5-preTEV-BLRP-3XFLAGdFRT	FBgn0053341	CG33341		dmel-5.43-3R(+)::20194080-20195141	dmel-5.43-3R	20194080	20195141	+	dmel-5.43-3R::20169226-20208485	FlyFos023102	49952	20169226	20208485	FlyFos023102[13373-14435]	dmel-5.43-3R(+)[20195114-20195113]		grows	[NGS] validated	fully_covered;no mut;flipped	fully_covered	no mut	flipped	25	138	74	0	0	0							1367792136965469_D09	58519847_52_D_9_13373_14435_dmel-5.43-3R_20195114_20195113
1367792136965469_D10	https://transgeneome.mpi-cbg.de/transgeneomics/public/clone.html?wellId=59042404	FlyFos023109(synj[37431]::S000169_fly_pretag)::2XTY1-SGFP-V5-preTEV-BLRP-3XFLAGdFRT	FBgn0034691	synj	synaptojanin, Synaptojanin, CG6562, Synj, IPP	dmel-5.43-2R(+)::17967663-17973272	dmel-5.43-2R	17967663	17973272	+	dmel-5.43-2R::17944605-17981769	FlyFos023109	47857	17944605	17981769	FlyFos023109[27802-28864]	dmel-5.43-2R(+)[17944605-17981769]		grows	[NGS] validated	fully_covered;no mut;flipped	fully_covered	no mut	flipped	27	136	123	0	0	0							1367792136965469_D10	58519847_52_D_10_27802_28864_dmel-5.43-2R_17944605_17981769
1367792136965469_D12	https://transgeneome.mpi-cbg.de/transgeneomics/public/clone.html?wellId=59042532	FlyFos023127(mute[38512]::S000169_fly_pretag)::2XTY1-SGFP-V5-preTEV-BLRP-3XFLAGdFRT	FBgn0085444	mute	muscle wasted, muscle wasted, CG33455, CG33456, mute, Mute, CG33455, CG15610, CG34415, CG33456	dmel-5.43-2R(-)::12835802-12842770	dmel-5.43-2R	12835802	12842770	-	dmel-5.43-2R::12825422-12865105	FlyFos023127	50376	12825422	12865105	FlyFos023127[28883-29945]	dmel-5.43-2R(-)[12836224-12836223]		grows	[NGS] validated	fully_covered;no mut;flipped	fully_covered	no mut	flipped	23	116	109	0	0	0							1367792136965469_D12	58519847_52_D_12_28883_29945_dmel-5.43-2R_12836224_12836223
1367792136965469_E01	https://transgeneome.mpi-cbg.de/transgeneomics/public/clone.html?wellId=59041836	FlyFos022992(CG10996[28105]::S000169_fly_pretag)::2XTY1-SGFP-V5-preTEV-BLRP-3XFLAGdFRT	FBgn0030525	CG10996		dmel-5.43-X(-)::13690422-13691671	dmel-5.43-X	13690422	13691671	-	dmel-5.43-X::13672002-13714638	FlyFos022992	53329	13672002	13714638	FlyFos022992[18476-19538]	dmel-5.43-X(-)[13672002-13714638]		grows	[NGS] validated	fully_covered;no mut;flipped	fully_covered	no mut	flipped	29	76	139	0	0	0							1367792136965469_E01	58519847_52_E_1_18476_19538_dmel-5.43-X_13672002_13714638
1367792136965469_E02	https://transgeneome.mpi-cbg.de/transgeneomics/public/clone.html?wellId=59041900	FlyFos023002(CG9592[22022]::S000169_fly_pretag)::2XTY1-SGFP-V5-preTEV-BLRP-3XFLAGdFRT	FBgn0036426	CG9592		dmel-5.43-3L(+)::14510993-14511575	dmel-5.43-3L	14510993	14511575	+	dmel-5.43-3L::14481356-14523939	FlyFos023002	53276	14481356	14523939	FlyFos023002[12393-13455]	dmel-5.43-3L(+)[14511548-14511547]		grows	[NGS] validated	fully_covered;no mut;flipped	fully_covered	no mut	flipped	15	80	77	0	0	0							1367792136965469_E02	58519847_52_E_2_12393_13455_dmel-5.43-3L_14511548_14511547
1367792136965469_E03	https://transgeneome.mpi-cbg.de/transgeneomics/public/clone.html?wellId=59041964	FlyFos023030(CG12347[33124]::S000169_fly_pretag)::2XTY1-SGFP-V5-preTEV-BLRP-3XFLAGdFRT	FBgn0038558	CG12347		dmel-5.43-3R(+)::13732167-13733173	dmel-5.43-3R	13732167	13733173	+	dmel-5.43-3R::13709084-13749034	FlyFos023030	50643	13709084	13749034	FlyFos023030[23495-24557]	dmel-5.43-3R(+)[13709084-13749034]		grows	[NGS] validated	fully_covered;no mut;flipped	fully_covered	no mut	flipped	15	91	89	0	0	0							1367792136965469_E03	58519847_52_E_3_23495_24557_dmel-5.43-3R_13709084_13749034
1367792136965469_E04	https://transgeneome.mpi-cbg.de/transgeneomics/public/clone.html?wellId=59042028	FlyFos023045(Cda9[22747]::S000169_fly_pretag)::2XTY1-SGFP-V5-preTEV-BLRP-3XFLAGdFRT	FBgn0034197	Cda9	Chitin deacetylase-like 9, CG15918, CG15918, DmCDA9	dmel-5.43-2R(+)::13016338-13017839	dmel-5.43-2R	13016338	13017839	+	dmel-5.43-2R::12992099-13030863	FlyFos023045	49457	12992099	13030863	FlyFos023045[13118-14180]	dmel-5.43-2R(+)[13017747-13017746]		grows	[NGS] validated	fully_covered;no mut;flipped	fully_covered	no mut	flipped	34	181	171	0	0	0							1367792136965469_E04	58519847_52_E_4_13118_14180_dmel-5.43-2R_13017747_13017746
1367792136965469_E05	https://transgeneome.mpi-cbg.de/transgeneomics/public/clone.html?wellId=59042092	FlyFos023068(beta3GalTII[16059]::S000169_fly_pretag)::2XTY1-SGFP-V5-preTEV-BLRP-3XFLAGdFRT	FBgn0033315	beta3GalTII	Galactosyltransferase II, CG8734, Galactosyltransferase II, CG8734, GalTII, dbeta3GalTII	dmel-5.43-2R(-)::4513686-4515116	dmel-5.43-2R	4513686	4515116	-	dmel-5.43-2R::4507515-4539750	FlyFos023068	42928	4507515	4539750	FlyFos023068[6430-7492]	dmel-5.43-2R(-)[4507515-4539750]		grows	[NGS] validated	fully_covered;no mut;flipped	fully_covered	no mut	flipped	41	256	201	0	0	0							1367792136965469_E05	58519847_52_E_5_6430_7492_dmel-5.43-2R_4507515_4539750
1367792136965469_E06	https://transgeneome.mpi-cbg.de/transgeneomics/public/clone.html?wellId=59042156	FlyFos023085(CG11722[17114]::S000169_fly_pretag)::2XTY1-SGFP-V5-preTEV-BLRP-3XFLAGdFRT	FBgn0037777	CG11722	BcDNA:AT14909	dmel-5.43-3R(-)::5870318-5871245	dmel-5.43-3R	5870318	5871245	-	dmel-5.43-3R::5862868-5901493	FlyFos023085	49318	5862868	5901493	FlyFos023085[7485-8547]	dmel-5.43-3R(-)[5862868-5901493]		grows	[NGS] validated	fully_covered;no mut;flipped	fully_covered	no mut	flipped	7	24	37	0	0	0							1367792136965469_E06	58519847_52_E_6_7485_8547_dmel-5.43-3R_5862868_5901493
1367792136965469_E07	https://transgeneome.mpi-cbg.de/transgeneomics/public/clone.html?wellId=59042220	FlyFos023092(CG18528[34181]::S000169_fly_pretag)::2XTY1-SGFP-V5-preTEV-BLRP-3XFLAGdFRT	FBgn0039189	CG18528		dmel-5.43-3R(-)::20183817-20185848	dmel-5.43-3R	20183817	20185848	-	dmel-5.43-3R::20169226-20208486	FlyFos023092	49953	20169226	20208486	FlyFos023092[24552-25614]	dmel-5.43-3R(-)[20183936-20183935]		grows	[NGS] validated	fully_covered;no mut;flipped	fully_covered	no mut	flipped	29	126	128	0	0	0							1367792136965469_E07	58519847_52_E_7_24552_25614_dmel-5.43-3R_20183936_20183935
1367792136965469_E08	https://transgeneome.mpi-cbg.de/transgeneomics/public/clone.html?wellId=59042284	FlyFos023095(CG15412[30382]::S000169_fly_pretag)::2XTY1-SGFP-V5-preTEV-BLRP-3XFLAGdFRT	FBgn0031528	CG15412		dmel-5.43-2L(-)::3373567-3375711	dmel-5.43-2L	3373567	3375711	-	dmel-5.43-2L::3363941-3394434	FlyFos023095	41186	3363941	3394434	FlyFos023095[20753-21815]	dmel-5.43-2L(-)[3373683-3373682]		grows	[NGS] validated	fully_covered;no mut;flipped	fully_covered	no mut	flipped	26	109	174	0	0	0							1367792136965469_E08	58519847_52_E_8_20753_21815_dmel-5.43-2L_3373683_3373682
1367792136965469_E09	https://transgeneome.mpi-cbg.de/transgeneomics/public/clone.html?wellId=59042348	FlyFos023104(Syx13[35689]::S000169_fly_pretag)::2XTY1-SGFP-V5-preTEV-BLRP-3XFLAGdFRT	FBgn0036341	Syx13	Syntaxin 13, Syntaxin, Syntaxin13, dSyntaxin13, syntaxin, syntaxin 13, DmSyx13, ff16 (69D1-70A2), SYN13, l(3)01470, ff16, CG11278, Syx, Dm Syx13	dmel-5.43-3L(+)::13037536-13040001	dmel-5.43-3L	13037536	13040001	+	dmel-5.43-3L::13013434-13051964	FlyFos023104	49223	13013434	13051964	FlyFos023104[26060-27122]	dmel-5.43-3L(+)[13013434-13051964]		grows	[NGS] validated	fully_covered;no mut;flipped	fully_covered	no mut	flipped	7	31	33	0	0	0							1367792136965469_E09	58519847_52_E_9_26060_27122_dmel-5.43-3L_13013434_13051964
1367792136965469_E10	https://transgeneome.mpi-cbg.de/transgeneomics/public/clone.html?wellId=59042412	FlyFos023114(Or98b[21205]::S000169_fly_pretag)::2XTY1-SGFP-V5-preTEV-BLRP-3XFLAGdFRT	FBgn0039582	Or98b	Odorant receptor 98b, DOR121, 98b, CG1867, Or98bP, 98C.1	dmel-5.43-3R(+)::24177964-24179224	dmel-5.43-3R	24177964	24179224	+	dmel-5.43-3R::24150358-24190796	FlyFos023114	51131	24150358	24190796	FlyFos023114[11576-12638]	dmel-5.43-3R(+)[24179222-24179221]		grows	[NGS] validated	fully_covered;no mut;flipped	fully_covered	no mut	flipped	7	35	30	0	0	0							1367792136965469_E10	58519847_52_E_10_11576_12638_dmel-5.43-3R_24179222_24179221
1367792136965469_E11	https://transgeneome.mpi-cbg.de/transgeneomics/public/clone.html?wellId=59042476	FlyFos023123(CG14647[43000]::S000169_fly_pretag)::2XTY1-SGFP-V5-preTEV-BLRP-3XFLAGdFRT	FBgn0037244	CG14647		dmel-5.43-3R(+)::226212-227739	dmel-5.43-3R	226212	227739	+	dmel-5.43-3R::194265-233207	FlyFos023123	49635	194265	233207	FlyFos023123[33371-34433]	dmel-5.43-3R(+)[194265-233207]		grows	[NGS] validated	fully_covered;no mut;flipped	fully_covered	no mut	flipped	26	159	123	0	0	0							1367792136965469_E11	58519847_52_E_11_33371_34433_dmel-5.43-3R_194265_233207
1367792136965469_E12	https://transgeneome.mpi-cbg.de/transgeneomics/public/clone.html?wellId=59042540	FlyFos023128(eff[32783]::S000169_fly_pretag)::2XTY1-SGFP-V5-preTEV-BLRP-3XFLAGdFRT	FBgn0011217	eff	effete, meiotic 68, Suppressor of GMR-sina 3-3, Ubiquitin conjugating enzyme 1, Effete, effette, ubcD1, UBC4, ms(3)01295, UBCD1, UbcD1, mei68, effete, 6535, ms(3)neo2, ms(3)1, UBCD-1, E(Pc)88D, ms(3)88D, CG7425, 3527, Ubc-D1, Eff, anon-WO0118547.343, ms(3)ry3, fs(3)01295, UbcD, l(3)01462, l(3)j2C8, EFF, ms(3)3, ms(3)ry1, SS3-3, l(3)s1782	dmel-5.43-3R(-)::10558427-10566933	dmel-5.43-3R	10558427	10566933	-	dmel-5.43-3R::10549660-10582372	FlyFos023128	43405	10549660	10582372	FlyFos023128[23154-24216]	dmel-5.43-3R(-)[10559220-10559219]		grows	[NGS] validated	fully_covered;no mut;flipped	fully_covered	no mut	flipped	13	56	69	0	0	0							1367792136965469_E12	58519847_52_E_12_23154_24216_dmel-5.43-3R_10559220_10559219
1367792136965469_F02	https://transgeneome.mpi-cbg.de/transgeneomics/public/clone.html?wellId=59041908	FlyFos023003(pcs[19347]::S000169_fly_pretag)::2XTY1-SGFP-V5-preTEV-BLRP-3XFLAGdFRT	FBgn0033988	pcs	parcas, poirot, CG7761, prt	dmel-5.43-2R(+)::10868782-10878841	dmel-5.43-2R	10868782	10878841	+	dmel-5.43-2R::10849648-10888292	FlyFos023003	49337	10849648	10888292	FlyFos023003[9718-10780]	dmel-5.43-2R(+)[10878576-10878575]		grows	[NGS] validated	fully_covered;no mut;flipped	fully_covered	no mut	flipped	27	127	119	0	0	0							1367792136965469_F02	58519847_52_F_2_9718_10780_dmel-5.43-2R_10878576_10878575
1367792136965469_F04	https://transgeneome.mpi-cbg.de/transgeneomics/public/clone.html?wellId=59042036	FlyFos023046(CG17683[27913]::S000169_fly_pretag)::2XTY1-SGFP-V5-preTEV-BLRP-3XFLAGdFRT	FBgn0262115	CG17683	lethal (2) NC38, lethal (2) NC70, lethal (2) NC37, l(2)NC37, NC38, NC70, NC37, l(2)NC38, l(2)NC70	dmel-5.43-2R(+)::18442-20468	dmel-5.43-2R	18442	20468	+	dmel-5.43-2R::1876-38984	FlyFos023046	47801	1876	38984	FlyFos023046[18284-19346]	dmel-5.43-2R(+)[1876-38984]		grows	[NGS] validated	fully_covered;no mut;flipped	fully_covered	no mut	flipped	9	41	47	0	0	0							1367792136965469_F04	58519847_52_F_4_18284_19346_dmel-5.43-2R_1876_38984
1367792136965469_F05	https://transgeneome.mpi-cbg.de/transgeneomics/public/clone.html?wellId=59042100	FlyFos023070(CG33764[34764]::S000169_fly_pretag)::2XTY1-SGFP-V5-preTEV-BLRP-3XFLAGdFRT	FBgn0053764	CG33764		dmel-5.43-3L(-)::4266789-4267503	dmel-5.43-3L	4266789	4267503	-	dmel-5.43-3L::4254268-4291925	FlyFos023070	48350	4254268	4291925	FlyFos023070[25135-26197]	dmel-5.43-3L(-)[4266792-4266791]		grows	[NGS] validated	fully_covered;no mut;flipped	fully_covered	no mut	flipped	30	91	136	0	0	0							1367792136965469_F05	58519847_52_F_5_25135_26197_dmel-5.43-3L_4266792_4266791
1367792136965469_F06	https://transgeneome.mpi-cbg.de/transgeneomics/public/clone.html?wellId=59042164	FlyFos023085(CG12811[19868]::S000169_fly_pretag)::2XTY1-SGFP-V5-preTEV-BLRP-3XFLAGdFRT	FBgn0037779	CG12811		dmel-5.43-3R(-)::5872974-5874289	dmel-5.43-3R	5872974	5874289	-	dmel-5.43-3R::5862868-5901493	FlyFos023085	49318	5862868	5901493	FlyFos023085[10239-11301]	dmel-5.43-3R(-)[5862868-5901493]		grows	[NGS] validated	fully_covered;no mut;flipped	fully_covered	no mut	flipped	30	114	121	0	0	0							1367792136965469_F06	58519847_52_F_6_10239_11301_dmel-5.43-3R_5862868_5901493
1367792136965469_F07	https://transgeneome.mpi-cbg.de/transgeneomics/public/clone.html?wellId=59042228	FlyFos023092(CG13614[21666]::S000169_fly_pretag)::2XTY1-SGFP-V5-preTEV-BLRP-3XFLAGdFRT	FBgn0039194	CG13614		dmel-5.43-3R(+)::20195290-20196453	dmel-5.43-3R	20195290	20196453	+	dmel-5.43-3R::20169226-20208486	FlyFos023092	49953	20169226	20208486	FlyFos023092[12037-13099]	dmel-5.43-3R(+)[20196451-20196450]		grows	[NGS] validated	fully_covered;no mut;flipped	fully_covered	no mut	flipped	29	172	93	0	0	0							1367792136965469_F07	58519847_52_F_7_12037_13099_dmel-5.43-3R_20196451_20196450
1367792136965469_F08	https://transgeneome.mpi-cbg.de/transgeneomics/public/clone.html?wellId=59042292	FlyFos023095(Sfp23F[16658]::S000169_fly_pretag)::2XTY1-SGFP-V5-preTEV-BLRP-3XFLAGdFRT	FBgn0259949	Sfp23F	Seminal fluid protein 23F, Seminal fluid protein 23F, CG42459	dmel-5.43-2L(-)::3387392-3387743	dmel-5.43-2L	3387392	3387743	-	dmel-5.43-2L::3363941-3394434	FlyFos023095	41186	3363941	3394434	FlyFos023095[7029-8091]	dmel-5.43-2L(-)[3387407-3387406]		grows	[NGS] validated	fully_covered;no mut;flipped	fully_covered	no mut	flipped	44	286	258	0	0	0							1367792136965469_F08	58519847_52_F_8_7029_8091_dmel-5.43-2L_3387407_3387406
1367792136965469_F09	https://transgeneome.mpi-cbg.de/transgeneomics/public/clone.html?wellId=59042356	FlyFos023105(CG30287[30712]::S000169_fly_pretag)::2XTY1-SGFP-V5-preTEV-BLRP-3XFLAGdFRT	FBgn0050287	CG30287	SP37, SPH37, CG10450	dmel-5.43-2R(-)::17424399-17425520	dmel-5.43-2R	17424399	17425520	-	dmel-5.43-2R::17413063-17445569	FlyFos023105	43199	17413063	17445569	FlyFos023105[21083-22145]	dmel-5.43-2R(-)[17424488-17424487]		grows	[NGS] validated	fully_covered;no mut;flipped	fully_covered	no mut	flipped	15	41	104	0	0	0							1367792136965469_F09	58519847_52_F_9_21083_22145_dmel-5.43-2R_17424488_17424487
1367792136965469_F10	https://transgeneome.mpi-cbg.de/transgeneomics/public/clone.html?wellId=59042420	FlyFos023114(Gfat2[37409]::S000169_fly_pretag)::2XTY1-SGFP-V5-preTEV-BLRP-3XFLAGdFRT	FBgn0039580	Gfat2	Glutamine:fructose-6-phosphate aminotransferase 2, CG1345, Dmel/GFAT2	dmel-5.43-3R(-)::24162741-24165490	dmel-5.43-3R	24162741	24165490	-	dmel-5.43-3R::24150358-24190796	FlyFos023114	51131	24150358	24190796	FlyFos023114[27780-28842]	dmel-5.43-3R(-)[24163018-24163017]		grows	[NGS] validated	fully_covered;no mut;flipped	fully_covered	no mut	flipped	40	188	147	0	0	0							1367792136965469_F10	58519847_52_F_10_27780_28842_dmel-5.43-3R_24163018_24163017
1367792136965469_F11	https://transgeneome.mpi-cbg.de/transgeneomics/public/clone.html?wellId=59042484	FlyFos023123(CG9853[39843]::S000169_fly_pretag)::2XTY1-SGFP-V5-preTEV-BLRP-3XFLAGdFRT	FBgn0086605	CG9853	CG41469, BEST:LD21829, CG41469	dmel-5.43-3R(-)::224280-227749	dmel-5.43-3R	224280	227749	-	dmel-5.43-3R::194265-233207	FlyFos023123	49635	194265	233207	FlyFos023123[30214-31276]	dmel-5.43-3R(-)[194265-233207]		grows	[NGS] validated	fully_covered;no mut;flipped	fully_covered	no mut	flipped	19	121	87	0	0	0							1367792136965469_F11	58519847_52_F_11_30214_31276_dmel-5.43-3R_194265_233207
1367792136965469_F12	https://transgeneome.mpi-cbg.de/transgeneomics/public/clone.html?wellId=59042548	FlyFos023131(Tango14[35397]::S000169_fly_pretag)::2XTY1-SGFP-V5-preTEV-BLRP-3XFLAGdFRT	FBgn0031312	Tango14	Transport and Golgi organization 14, lethal (2) k00619, l(2)k00619, CG4775, TANGO14, BcDNA:SD10843	dmel-5.43-2L(+)::1158679-1160221	dmel-5.43-2L	1158679	1160221	+	dmel-5.43-2L::1134331-1170482	FlyFos023131	46844	1134331	1170482	FlyFos023131[25768-26830]	dmel-5.43-2L(+)[1134331-1170482]		grows	[NGS] validated	fully_covered;no mut;flipped	fully_covered	no mut	flipped	24	102	98	0	0	0							1367792136965469_F12	58519847_52_F_12_25768_26830_dmel-5.43-2L_1134331_1170482
1367792136965469_G01	https://transgeneome.mpi-cbg.de/transgeneomics/public/clone.html?wellId=59041852	FlyFos022998(Mesh1[19730]::S000169_fly_pretag)::2XTY1-SGFP-V5-preTEV-BLRP-3XFLAGdFRT	FBgn0039650	Mesh1	Metazoan SpoT homolog-1, metazoan SpoT homolog-1, Q9VAM9, CG11900	dmel-5.43-3R(-)::25027478-25028247	dmel-5.43-3R	25027478	25028247	-	dmel-5.43-3R::24997393-25037616	FlyFos022998	50916	24997393	25037616	FlyFos022998[10101-11163]	dmel-5.43-3R(-)[25027517-25027516]		grows	[NGS] validated	fully_covered;no mut;flipped	fully_covered	no mut	flipped	12	62	56	0	0	0							1367792136965469_G01	58519847_52_G_1_10101_11163_dmel-5.43-3R_25027517_25027516
1367792136965469_G02	https://transgeneome.mpi-cbg.de/transgeneomics/public/clone.html?wellId=59041916	FlyFos023014(pzg[18261]::S000169_fly_pretag)::2XTY1-SGFP-V5-preTEV-BLRP-3XFLAGdFRT	FBgn0259785	pzg	putzig, Z4, Z4, p160, CG7752	dmel-5.43-3L(+)::21279163-21283410	dmel-5.43-3L	21279163	21283410	+	dmel-5.43-3L::21255360-21291215	FlyFos023014	46548	21255360	21291215	FlyFos023014[8632-9694]	dmel-5.43-3L(+)[21282585-21282584]		grows	[NGS] validated	fully_covered;no mut;flipped	fully_covered	no mut	flipped	40	207	168	0	0	0							1367792136965469_G02	58519847_52_G_2_8632_9694_dmel-5.43-3L_21282585_21282584
1367792136965469_G03	https://transgeneome.mpi-cbg.de/transgeneomics/public/clone.html?wellId=59041980	FlyFos023034(Oseg6[13888]::S000169_fly_pretag)::2XTY1-SGFP-V5-preTEV-BLRP-3XFLAGdFRT	FBgn0034452	Oseg6	Oseg6, Wdr19, CG11237, OSEG6, OSEG	dmel-5.43-2R(-)::15374549-15379241	dmel-5.43-2R	15374549	15379241	-	dmel-5.43-2R::15370407-15407315	FlyFos023034	47601	15370407	15407315	FlyFos023034[4259-5321]	dmel-5.43-2R(-)[15370407-15407315]		grows	[NGS] validated	fully_covered;no mut;flipped	fully_covered	no mut	flipped	37	147	175	0	0	0							1367792136965469_G03	58519847_52_G_3_4259_5321_dmel-5.43-2R_15370407_15407315
1367792136965469_G04	https://transgeneome.mpi-cbg.de/transgeneomics/public/clone.html?wellId=59042044	FlyFos023047(CG13693[19638]::S000169_fly_pretag)::2XTY1-SGFP-V5-preTEV-BLRP-3XFLAGdFRT	FBgn0031235	CG13693		dmel-5.43-2L(+)::232514-233965	dmel-5.43-2L	232514	233965	+	dmel-5.43-2L::210635-243970	FlyFos023047	44028	210635	243970	FlyFos023047[10009-11071]	dmel-5.43-2L(+)[233963-233962]		grows	[NGS] validated	fully_covered;no mut;flipped	fully_covered	no mut	flipped	34	227	171	0	0	0							1367792136965469_G04	58519847_52_G_4_10009_11071_dmel-5.43-2L_233963_233962
1367792136965469_G05	https://transgeneome.mpi-cbg.de/transgeneomics/public/clone.html?wellId=59042108	FlyFos023070(CG1311[20212]::S000169_fly_pretag)::2XTY1-SGFP-V5-preTEV-BLRP-3XFLAGdFRT	FBgn0035523	CG1311		dmel-5.43-3L(+)::4277964-4281618	dmel-5.43-3L	4277964	4281618	+	dmel-5.43-3L::4254268-4291925	FlyFos023070	48350	4254268	4291925	FlyFos023070[10583-11645]	dmel-5.43-3L(+)[4281344-4281343]		grows	[NGS] validated	fully_covered;no mut;flipped	fully_covered	no mut	flipped	16	86	64	0	0	0							1367792136965469_G05	58519847_52_G_5_10583_11645_dmel-5.43-3L_4281344_4281343
1367792136965469_G06	https://transgeneome.mpi-cbg.de/transgeneomics/public/clone.html?wellId=59042172	FlyFos023085(CG33631[37127]::S000169_fly_pretag)::2XTY1-SGFP-V5-preTEV-BLRP-3XFLAGdFRT	FBgn0053631	CG33631	CG12808	dmel-5.43-3R(+)::5889729-5890367	dmel-5.43-3R	5889729	5890367	+	dmel-5.43-3R::5862868-5901493	FlyFos023085	49318	5862868	5901493	FlyFos023085[27498-28560]	dmel-5.43-3R(+)[5862868-5901493]		grows	[NGS] validated	fully_covered;no mut;flipped	fully_covered	no mut	flipped	47	279	267	0	0	0							1367792136965469_G06	58519847_52_G_6_27498_28560_dmel-5.43-3R_5862868_5901493
1367792136965469_G08	https://transgeneome.mpi-cbg.de/transgeneomics/public/clone.html?wellId=59042300	FlyFos023095(CG42460[15965]::S000169_fly_pretag)::2XTY1-SGFP-V5-preTEV-BLRP-3XFLAGdFRT	FBgn0259950	CG42460		dmel-5.43-2L(-)::3387898-3388496	dmel-5.43-2L	3387898	3388496	-	dmel-5.43-2L::3363941-3394434	FlyFos023095	41186	3363941	3394434	FlyFos023095[6336-7398]	dmel-5.43-2L(-)[3388100-3388099]		grows	[NGS] validated	fully_covered;no mut;flipped	fully_covered	no mut	flipped	45	266	346	0	0	0							1367792136965469_G08	58519847_52_G_8_6336_7398_dmel-5.43-2L_3388100_3388099
1367792136965469_G09	https://transgeneome.mpi-cbg.de/transgeneomics/public/clone.html?wellId=59042364	FlyFos023105(CG30286[31917]::S000169_fly_pretag)::2XTY1-SGFP-V5-preTEV-BLRP-3XFLAGdFRT	FBgn0050286	CG30286	SP37, SPH37, CG10450	dmel-5.43-2R(-)::17423221-17424300	dmel-5.43-2R	17423221	17424300	-	dmel-5.43-2R::17413063-17445569	FlyFos023105	43199	17413063	17445569	FlyFos023105[22288-23350]	dmel-5.43-2R(-)[17423283-17423282]		grows	[NGS] validated	fully_covered;no mut;flipped	fully_covered	no mut	flipped	37	158	206	0	0	0							1367792136965469_G09	58519847_52_G_9_22288_23350_dmel-5.43-2R_17423283_17423282
1367792136965469_G10	https://transgeneome.mpi-cbg.de/transgeneomics/public/clone.html?wellId=59042428	FlyFos023117(CG2556[37941]::S000169_fly_pretag)::2XTY1-SGFP-V5-preTEV-BLRP-3XFLAGdFRT	FBgn0030396	CG2556		dmel-5.43-X(+)::12391194-12410580	dmel-5.43-X	12391194	12410580	+	dmel-5.43-X::12381779-12417610	FlyFos023117	46524	12381779	12417610	FlyFos023117[28312-29374]	dmel-5.43-X(+)[12381779-12417610]		grows	[NGS] validated	fully_covered;no mut;flipped	fully_covered	no mut	flipped	32	135	174	0	0	0							1367792136965469_G10	58519847_52_G_10_28312_29374_dmel-5.43-X_12381779_12417610
1367792136965469_G11	https://transgeneome.mpi-cbg.de/transgeneomics/public/clone.html?wellId=59042492	FlyFos023123(CG34112[34846]::S000169_fly_pretag)::2XTY1-SGFP-V5-preTEV-BLRP-3XFLAGdFRT	FBgn0086608	CG34112	CG41471, CG41471, CG14649	dmel-5.43-3R(-)::217433-219981	dmel-5.43-3R	217433	219981	-	dmel-5.43-3R::194265-233207	FlyFos023123	49635	194265	233207	FlyFos023123[25217-26279]	dmel-5.43-3R(-)[194265-233207]		grows	[NGS] validated	fully_covered;no mut;flipped	fully_covered	no mut	flipped	32	154	185	0	0	0							1367792136965469_G11	58519847_52_G_11_25217_26279_dmel-5.43-3R_194265_233207
1367792136965469_G12	https://transgeneome.mpi-cbg.de/transgeneomics/public/clone.html?wellId=59042556	FlyFos023131(Tfb4[24816]::S000169_fly_pretag)::2XTY1-SGFP-V5-preTEV-BLRP-3XFLAGdFRT	FBgn0031309	Tfb4	Tfb4, TFB4, CG5041	dmel-5.43-2L(-)::1149445-1150673	dmel-5.43-2L	1149445	1150673	-	dmel-5.43-2L::1134331-1170482	FlyFos023131	46844	1134331	1170482	FlyFos023131[15187-16249]	dmel-5.43-2L(-)[1134331-1170482]		grows	[NGS] validated	fully_covered;no mut;flipped	fully_covered	no mut	flipped	39	144	197	0	0	0							1367792136965469_G12	58519847_52_G_12_15187_16249_dmel-5.43-2L_1134331_1170482
1367792136965469_H01	https://transgeneome.mpi-cbg.de/transgeneomics/public/clone.html?wellId=59041860	FlyFos022998(CG14508[18821]::S000169_fly_pretag)::2XTY1-SGFP-V5-preTEV-BLRP-3XFLAGdFRT	FBgn0039651	CG14508	Ubiquinol-cytochrome c reductase Cytochrome C1, heme protein	dmel-5.43-3R(-)::25028387-25029855	dmel-5.43-3R	25028387	25029855	-	dmel-5.43-3R::24997393-25037616	FlyFos022998	50916	24997393	25037616	FlyFos022998[9192-10254]	dmel-5.43-3R(-)[25028426-25028425]		grows	[NGS] validated	fully_covered;no mut;flipped	fully_covered	no mut	flipped	29	133	164	0	0	0							1367792136965469_H01	58519847_52_H_1_9192_10254_dmel-5.43-3R_25028426_25028425
1367792136965469_H02	https://transgeneome.mpi-cbg.de/transgeneomics/public/clone.html?wellId=59041924	FlyFos023020(CG15249[27522]::S000169_fly_pretag)::2XTY1-SGFP-V5-preTEV-BLRP-3XFLAGdFRT	FBgn0030161	CG15249		dmel-5.43-X(-)::9782323-9783193	dmel-5.43-X	9782323	9783193	-	dmel-5.43-X::9764542-9804928	FlyFos023020	51079	9764542	9804928	FlyFos023020[17893-18955]	dmel-5.43-X(-)[9764542-9804928]		grows	[NGS] validated	fully_covered;no mut;flipped	fully_covered	no mut	flipped	25	100	122	0	0	0							1367792136965469_H02	58519847_52_H_2_17893_18955_dmel-5.43-X_9764542_9804928
1367792136965469_H03	https://transgeneome.mpi-cbg.de/transgeneomics/public/clone.html?wellId=59041988	FlyFos023034(Ir56b[36170]::S000169_fly_pretag)::2XTY1-SGFP-V5-preTEV-BLRP-3XFLAGdFRT	FBgn0034456	Ir56b	Ionotropic receptor 56b, CG15121, ionotropic receptor 56b, IR56b, CG15121	dmel-5.43-2R(+)::15395672-15396949	dmel-5.43-2R	15395672	15396949	+	dmel-5.43-2R::15370407-15407315	FlyFos023034	47601	15370407	15407315	FlyFos023034[26541-27603]	dmel-5.43-2R(+)[15370407-15407315]		grows	[NGS] validated	fully_covered;no mut;flipped	fully_covered	no mut	flipped	29	128	150	0	0	0							1367792136965469_H03	58519847_52_H_3_26541_27603_dmel-5.43-2R_15370407_15407315
1367792136965469_H04	https://transgeneome.mpi-cbg.de/transgeneomics/public/clone.html?wellId=59042052	FlyFos023049(Cpr66Cb[42107]::S000169_fly_pretag)::2XTY1-SGFP-V5-preTEV-BLRP-3XFLAGdFRT	FBgn0035875	Cpr66Cb	Cuticular protein 66Cb, CG7076, CG7076, DmelCpr66Cb	dmel-5.43-3L(+)::8329772-8331695	dmel-5.43-3L	8329772	8331695	+	dmel-5.43-3L::8298769-8342424	FlyFos023049	54348	8298769	8342424	FlyFos023049[32478-33540]	dmel-5.43-3L(+)[8298769-8342424]		grows	[NGS] validated	fully_covered;no mut;flipped	fully_covered	no mut	flipped	20	120	83	0	0	0							1367792136965469_H04	58519847_52_H_4_32478_33540_dmel-5.43-3L_8298769_8342424
1367792136965469_H05	https://transgeneome.mpi-cbg.de/transgeneomics/public/clone.html?wellId=59042116	FlyFos023070(CG1273[24179]::S000169_fly_pretag)::2XTY1-SGFP-V5-preTEV-BLRP-3XFLAGdFRT	FBgn0035522	CG1273		dmel-5.43-3L(+)::4263721-4277782	dmel-5.43-3L	4263721	4277782	+	dmel-5.43-3L::4254268-4291925	FlyFos023070	48350	4254268	4291925	FlyFos023070[14550-15612]	dmel-5.43-3L(+)[4277377-4277376]		grows	[NGS] validated	fully_covered;no mut;flipped	fully_covered	no mut	flipped	31	183	134	0	0	0							1367792136965469_H05	58519847_52_H_5_14550_15612_dmel-5.43-3L_4277377_4277376
1367792136965469_H06	https://transgeneome.mpi-cbg.de/transgeneomics/public/clone.html?wellId=59042180	FlyFos023085(CG33784[41054]::S000169_fly_pretag)::2XTY1-SGFP-V5-preTEV-BLRP-3XFLAGdFRT	FBgn0053784	CG33784	HDC12790	dmel-5.43-3R(+)::5893627-5894294	dmel-5.43-3R	5893627	5894294	+	dmel-5.43-3R::5862868-5901493	FlyFos023085	49318	5862868	5901493	FlyFos023085[31425-32487]	dmel-5.43-3R(+)[5862868-5901493]		grows	[NGS] validated	fully_covered;no mut;flipped	fully_covered	no mut	flipped	24	126	94	0	0	0							1367792136965469_H06	58519847_52_H_6_31425_32487_dmel-5.43-3R_5862868_5901493
1367792136965469_H07	https://transgeneome.mpi-cbg.de/transgeneomics/public/clone.html?wellId=59042244	FlyFos023094(CG5902[31145]::S000169_fly_pretag)::2XTY1-SGFP-V5-preTEV-BLRP-3XFLAGdFRT	FBgn0039136	CG5902	anon-WO0118547.372	dmel-5.43-3R(+)::19812362-19814460	dmel-5.43-3R	19812362	19814460	+	dmel-5.43-3R::19792364-19827112	FlyFos023094	45441	19792364	19827112	FlyFos023094[21516-22578]	dmel-5.43-3R(+)[19792364-19827112]		grows	[NGS] validated	fully_covered;no mut;flipped	fully_covered	no mut	flipped	30	141	131	0	0	0							1367792136965469_H07	58519847_52_H_7_21516_22578_dmel-5.43-3R_19792364_19827112
1367792136965469_H08	https://transgeneome.mpi-cbg.de/transgeneomics/public/clone.html?wellId=59042308	FlyFos023099(CG4764[26708]::S000169_fly_pretag)::2XTY1-SGFP-V5-preTEV-BLRP-3XFLAGdFRT	FBgn0031310	CG4764		dmel-5.43-2L(+)::1150783-1151764	dmel-5.43-2L	1150783	1151764	+	dmel-5.43-2L::1134331-1170473	FlyFos023099	46835	1134331	1170473	FlyFos023099[17079-18141]	dmel-5.43-2L(+)[1134331-1170473]		grows	[NGS] validated	fully_covered;no mut;flipped	fully_covered	no mut	flipped	25	155	119	0	0	0							1367792136965469_H08	58519847_52_H_8_17079_18141_dmel-5.43-2L_1134331_1170473
1367792136965469_H09	https://transgeneome.mpi-cbg.de/transgeneomics/public/clone.html?wellId=59042372	FlyFos023107(CG4375[22548]::S000169_fly_pretag)::2XTY1-SGFP-V5-preTEV-BLRP-3XFLAGdFRT	FBgn0031295	CG4375	BcDNA:AT13819	dmel-5.43-2L(-)::1026105-1026897	dmel-5.43-2L	1026105	1026897	-	dmel-5.43-2L::1013270-1049609	FlyFos023107	47032	1013270	1049609	FlyFos023107[12919-13981]	dmel-5.43-2L(-)[1013270-1049609]		grows	[NGS] validated	fully_covered;no mut;flipped	fully_covered	no mut	flipped	48	304	292	0	0	0							1367792136965469_H09	58519847_52_H_9_12919_13981_dmel-5.43-2L_1013270_1049609
1367792136965469_H11	https://transgeneome.mpi-cbg.de/transgeneomics/public/clone.html?wellId=59042500	FlyFos023124(Cpr73D[36219]::S000169_fly_pretag)::2XTY1-SGFP-V5-preTEV-BLRP-3XFLAGdFRT	FBgn0036680	Cpr73D	Cuticular protein 73D, CG9665, CG9665	dmel-5.43-3L(-)::16932200-16935823	dmel-5.43-3L	16932200	16935823	-	dmel-5.43-3L::16923649-16958929	FlyFos023124	45973	16923649	16958929	FlyFos023124[26590-27652]	dmel-5.43-3L(-)[16932341-16932340]		grows	[NGS] validated	fully_covered;no mut;flipped	fully_covered	no mut	flipped	28	149	161	0	0	0							1367792136965469_H11	58519847_52_H_11_26590_27652_dmel-5.43-3L_16932341_16932340
13820775239620986_A02	https://transgeneome.mpi-cbg.de/transgeneomics/public/clone.html?wellId=59046434	FlyFos023933(Hsp60D[29679]::S000169_fly_pretag)::2XTY1-SGFP-V5-preTEV-BLRP-3XFLAGdFRT	FBgn0032525	Hsp60D	Hsp60D, CG16954	dmel-5.43-2L(-)::13447538-13449497	dmel-5.43-2L	13447538	13449497	-	dmel-5.43-2L::13433391-13467721	FlyFos023933	45023	13433391	13467721	FlyFos023933[20050-21112]	dmel-5.43-2L(-)[13447673-13447672]		grows	[NGS] validated	fully_covered;no mut;flipped	fully_covered	no mut	flipped	28	109	156	0	0	0							13820775239620986_A02	58519847_58_A_2_20050_21112_dmel-5.43-2L_13447673_13447672
13820775239620986_A03	https://transgeneome.mpi-cbg.de/transgeneomics/public/clone.html?wellId=59046498	FlyFos023952(Tsp42Ed[31200]::S000169_fly_pretag)::2XTY1-SGFP-V5-preTEV-BLRP-3XFLAGdFRT	FBgn0029507	Tsp42Ed	Tetraspanin 42Ed, tetraspanin 42E, Dm.Tsp42Ed, GH07074, CG12846, BcDNA:GH07074	dmel-5.43-2R(-)::2897365-2899359	dmel-5.43-2R	2897365	2899359	-	dmel-5.43-2R::2883371-2919051	FlyFos023952	46373	2883371	2919051	FlyFos023952[21571-22633]	dmel-5.43-2R(-)[2897482-2897481]		grows	[NGS] validated	fully_covered;no mut;flipped	fully_covered	no mut	flipped	31	114	144	0	0	0							13820775239620986_A03	58519847_58_A_3_21571_22633_dmel-5.43-2R_2897482_2897481
13820775239620986_A04	https://transgeneome.mpi-cbg.de/transgeneomics/public/clone.html?wellId=59046562	FlyFos023974(CG15543[31166]::S000169_fly_pretag)::2XTY1-SGFP-V5-preTEV-BLRP-3XFLAGdFRT	FBgn0039799	CG15543		dmel-5.43-3R(+)::26568602-26569637	dmel-5.43-3R	26568602	26569637	+	dmel-5.43-3R::26554945-26591071	FlyFos023974	46819	26554945	26591071	FlyFos023974[21537-22599]	dmel-5.43-3R(+)[26569536-26569535]		grows	[NGS] validated	fully_covered;no mut;flipped	fully_covered	no mut	flipped	31	153	173	0	0	0							13820775239620986_A04	58519847_58_A_4_21537_22599_dmel-5.43-3R_26569536_26569535
13820775239620986_A06	https://transgeneome.mpi-cbg.de/transgeneomics/public/clone.html?wellId=59046690	FlyFos024001(CG5376[18843]::S000169_fly_pretag)::2XTY1-SGFP-V5-preTEV-BLRP-3XFLAGdFRT	FBgn0038977	CG5376		dmel-5.43-3R(-)::18313753-18314677	dmel-5.43-3R	18313753	18314677	-	dmel-5.43-3R::18304594-18337492	FlyFos024001	43591	18304594	18337492	FlyFos024001[9214-10276]	dmel-5.43-3R(-)[18304594-18337492]		grows	[NGS] validated	fully_covered;no mut;flipped	fully_covered	no mut	flipped	38	273	174	0	0	0							13820775239620986_A06	58519847_58_A_6_9214_10276_dmel-5.43-3R_18304594_18337492
13820775239620986_A07	https://transgeneome.mpi-cbg.de/transgeneomics/public/clone.html?wellId=59046754	FlyFos024020(CG2224[39163]::S000169_fly_pretag)::2XTY1-SGFP-V5-preTEV-BLRP-3XFLAGdFRT	FBgn0039773	CG2224	Amsh	dmel-5.43-3R(-)::26282683-26285110	dmel-5.43-3R	26282683	26285110	-	dmel-5.43-3R::26272322-26312316	FlyFos024020	50687	26272322	26312316	FlyFos024020[29534-30596]	dmel-5.43-3R(-)[26282784-26282783]		grows	[NGS] validated	fully_covered;no mut;flipped	fully_covered	no mut	flipped	28	119	131	0	0	0							13820775239620986_A07	58519847_58_A_7_29534_30596_dmel-5.43-3R_26282784_26282783
13820775239620986_A08	https://transgeneome.mpi-cbg.de/transgeneomics/public/clone.html?wellId=59046818	FlyFos024032(TwdlT[23803]::S000169_fly_pretag)::2XTY1-SGFP-V5-preTEV-BLRP-3XFLAGdFRT	FBgn0029170	TwdlT	TweedleT, GCR(ich), CG5812, GCR(ich)	dmel-5.43-3R(+)::22874947-22876742	dmel-5.43-3R	22874947	22876742	+	dmel-5.43-3R::22850172-22890340	FlyFos024032	50861	22850172	22890340	FlyFos024032[14174-15236]	dmel-5.43-3R(+)[22876168-22876167]		grows	[NGS] validated	fully_covered;no mut;flipped	fully_covered	no mut	flipped	27	149	159	0	0	0							13820775239620986_A08	58519847_58_A_8_14174_15236_dmel-5.43-3R_22876168_22876167
13820775239620986_A10	https://transgeneome.mpi-cbg.de/transgeneomics/public/clone.html?wellId=59046946	FlyFos024061(mthl9[28228]::S000169_fly_pretag)::2XTY1-SGFP-V5-preTEV-BLRP-3XFLAGdFRT	FBgn0035131	mthl9	methuselah-like 9, Mth-like 9, mth-like 9, CG17084, anon-WO0170980.164, anon-WO0170980.163, Mth-9	dmel-5.43-3L(-)::329822-332306	dmel-5.43-3L	329822	332306	-	dmel-5.43-3L::315589-348640	FlyFos024061	43744	315589	348640	FlyFos024061[18599-19661]	dmel-5.43-3L(-)[330043-330042]		grows	[NGS] validated	fully_covered;no mut;flipped	fully_covered	no mut	flipped	26	151	133	0	0	0							13820775239620986_A10	58519847_58_A_10_18599_19661_dmel-5.43-3L_330043_330042
13820775239620986_B02	https://transgeneome.mpi-cbg.de/transgeneomics/public/clone.html?wellId=59046442	FlyFos023947(CG4330[21712]::S000169_fly_pretag)::2XTY1-SGFP-V5-preTEV-BLRP-3XFLAGdFRT	FBgn0030452	CG4330	AA202479	dmel-5.43-X(+)::13025571-13028598	dmel-5.43-X	13025571	13028598	+	dmel-5.43-X::12999195-13040548	FlyFos023947	52046	12999195	13040548	FlyFos023947[12083-13145]	dmel-5.43-X(+)[13028467-13028466]		grows	[NGS] validated	fully_covered;no mut;flipped	fully_covered	no mut	flipped	16	77	69	0	0	0							13820775239620986_B02	58519847_58_B_2_12083_13145_dmel-5.43-X_13028467_13028466
13820775239620986_B03	https://transgeneome.mpi-cbg.de/transgeneomics/public/clone.html?wellId=59046506	FlyFos023955(CG1826[17539]::S000169_fly_pretag)::2XTY1-SGFP-V5-preTEV-BLRP-3XFLAGdFRT	FBgn0030228	CG1826		dmel-5.43-X(+)::10662570-10665736	dmel-5.43-X	10662570	10665736	+	dmel-5.43-X::10636716-10673011	FlyFos023955	46988	10636716	10673011	FlyFos023955[7910-8972]	dmel-5.43-X(+)[10665103-10665102]		grows	[NGS] validated	fully_covered;no mut;flipped	fully_covered	no mut	flipped	18	89	58	0	0	0							13820775239620986_B03	58519847_58_B_3_7910_8972_dmel-5.43-X_10665103_10665102
13820775239620986_B04	https://transgeneome.mpi-cbg.de/transgeneomics/public/clone.html?wellId=59046570	FlyFos023974(Npc2g[30223]::S000169_fly_pretag)::2XTY1-SGFP-V5-preTEV-BLRP-3XFLAGdFRT	FBgn0039800	Npc2g	Niemann-Pick type C-2g, CG11314, BcDNA:RE56164, CG11314, npc2g	dmel-5.43-3R(-)::26570326-26570983	dmel-5.43-3R	26570326	26570983	-	dmel-5.43-3R::26554945-26591071	FlyFos023974	46819	26554945	26591071	FlyFos023974[20594-21656]	dmel-5.43-3R(-)[26570479-26570478]		grows	[NGS] validated	fully_covered;no mut;flipped	fully_covered	no mut	flipped	23	130	79	0	0	0							13820775239620986_B04	58519847_58_B_4_20594_21656_dmel-5.43-3R_26570479_26570478
13820775239620986_B06	https://transgeneome.mpi-cbg.de/transgeneomics/public/clone.html?wellId=59046698	FlyFos024001(T-cp1[20064]::S000169_fly_pretag)::2XTY1-SGFP-V5-preTEV-BLRP-3XFLAGdFRT	FBgn0003676	T-cp1	Tcp1-like, T-complex 1, Tcp-1, Tcp1-like, BEST:GH05123, T-cpl, CCT1, gh05123, TCPA_DROME, TCP-1alpha, Tcp1, CG5374	dmel-5.43-3R(-)::18314807-18317153	dmel-5.43-3R	18314807	18317153	-	dmel-5.43-3R::18304594-18337492	FlyFos024001	43591	18304594	18337492	FlyFos024001[10435-11497]	dmel-5.43-3R(-)[18304594-18337492]		grows	[NGS] validated	fully_covered;no mut;flipped	fully_covered	no mut	flipped	28	168	108	0	0	0							13820775239620986_B06	58519847_58_B_6_10435_11497_dmel-5.43-3R_18304594_18337492
13820775239620986_B07	https://transgeneome.mpi-cbg.de/transgeneomics/public/clone.html?wellId=59046762	FlyFos024020(CDase[30666]::S000169_fly_pretag)::2XTY1-SGFP-V5-preTEV-BLRP-3XFLAGdFRT	FBgn0039774	CDase	Ceramidase, slug-a-bed, ceramidase, slab, fcd, cdase, CG1471, anon-WO0118547.407	dmel-5.43-3R(+)::26285511-26291458	dmel-5.43-3R	26285511	26291458	+	dmel-5.43-3R::26272322-26312316	FlyFos024020	50687	26272322	26312316	FlyFos024020[21037-22099]	dmel-5.43-3R(+)[26291281-26291280]		grows	[NGS] validated	fully_covered;no mut;flipped	fully_covered	no mut	flipped	26	126	102	0	0	0							13820775239620986_B07	58519847_58_B_7_21037_22099_dmel-5.43-3R_26291281_26291280
13820775239620986_B08	https://transgeneome.mpi-cbg.de/transgeneomics/public/clone.html?wellId=59046826	FlyFos024037(CG30496[19696]::S000169_fly_pretag)::2XTY1-SGFP-V5-preTEV-BLRP-3XFLAGdFRT	FBgn0050496	CG30496	CG1952, BcDNA:RE73310, anon-WO0118547.218	dmel-5.43-2R(+)::3587009-3589383	dmel-5.43-2R	3587009	3589383	+	dmel-5.43-2R::3578986-3622300	FlyFos024037	54007	3578986	3622300	FlyFos024037[10067-11129]	dmel-5.43-2R(+)[3578986-3622300]		grows	[NGS] validated	fully_covered;no mut;flipped	fully_covered	no mut	flipped	17	77	62	0	0	0							13820775239620986_B08	58519847_58_B_8_10067_11129_dmel-5.43-2R_3578986_3622300
13820775239620986_B09	https://transgeneome.mpi-cbg.de/transgeneomics/public/clone.html?wellId=59046890	FlyFos024057(CG31226[20230]::S000169_fly_pretag)::2XTY1-SGFP-V5-preTEV-BLRP-3XFLAGdFRT	FBgn0051226	CG31226	BcDNA:AT26083, NEST:bs14h12	dmel-5.43-3R(-)::14677025-14677526	dmel-5.43-3R	14677025	14677526	-	dmel-5.43-3R::14666617-14700144	FlyFos024057	44220	14666617	14700144	FlyFos024057[10601-11663]	dmel-5.43-3R(-)[14666617-14700144]		grows	[NGS] validated	fully_covered;no mut;flipped	fully_covered	no mut	flipped	36	209	203	0	0	0							13820775239620986_B09	58519847_58_B_9_10601_11663_dmel-5.43-3R_14666617_14700144
13820775239620986_B10	https://transgeneome.mpi-cbg.de/transgeneomics/public/clone.html?wellId=59046954	FlyFos024067(Sgs5[31085]::S000169_fly_pretag)::2XTY1-SGFP-V5-preTEV-BLRP-3XFLAGdFRT	FBgn0003375	Sgs5	Salivary gland secretion 5, Sgs-5, CG7596, Sgs, sgs5, BcDNA:LP02306, SGS-5	dmel-5.43-3R(+)::13421084-13421834	dmel-5.43-3R	13421084	13421834	+	dmel-5.43-3R::13400263-13434168	FlyFos024067	44598	13400263	13434168	FlyFos024067[21456-22518]	dmel-5.43-3R(+)[13400263-13434168]		grows	[NGS] validated	fully_covered;no mut;flipped	fully_covered	no mut	flipped	26	173	119	0	0	0							13820775239620986_B10	58519847_58_B_10_21456_22518_dmel-5.43-3R_13400263_13434168
13820775239620986_B12	https://transgeneome.mpi-cbg.de/transgeneomics/public/clone.html?wellId=59047082	FlyFos024109(CG3021[28955]::S000169_fly_pretag)::2XTY1-SGFP-V5-preTEV-BLRP-3XFLAGdFRT	FBgn0040337	CG3021	Transcription unit E, EG:BACR7A4.8, E, anon-1Ed	dmel-5.43-X(+)::920867-922323	dmel-5.43-X	920867	922323	+	dmel-5.43-X::902856-941128	FlyFos024109	48965	902856	941128	FlyFos024109[19326-20388]	dmel-5.43-X(+)[902856-941128]		grows	[NGS] validated	fully_covered;no mut;flipped	fully_covered	no mut	flipped	36	202	144	0	0	0							13820775239620986_B12	58519847_58_B_12_19326_20388_dmel-5.43-X_902856_941128
13820775239620986_C02	https://transgeneome.mpi-cbg.de/transgeneomics/public/clone.html?wellId=59046450	FlyFos023947(CG15717[26171]::S000169_fly_pretag)::2XTY1-SGFP-V5-preTEV-BLRP-3XFLAGdFRT	FBgn0030451	CG15717		dmel-5.43-X(+)::13023053-13024324	dmel-5.43-X	13023053	13024324	+	dmel-5.43-X::12999195-13040548	FlyFos023947	52046	12999195	13040548	FlyFos023947[16542-17604]	dmel-5.43-X(+)[13024008-13024007]		grows	[NGS] validated	fully_covered;no mut;flipped	fully_covered	no mut	flipped	24	111	115	0	0	0							13820775239620986_C02	58519847_58_C_2_16542_17604_dmel-5.43-X_13024008_13024007
13820775239620986_C03	https://transgeneome.mpi-cbg.de/transgeneomics/public/clone.html?wellId=59046514	FlyFos023955(Rph[38815]::S000169_fly_pretag)::2XTY1-SGFP-V5-preTEV-BLRP-3XFLAGdFRT	FBgn0030230	Rph	Rabphilin, Rabphilin-3A, rabphilin-3A, dm-rabphilin, CG11556	dmel-5.43-X(-)::10643110-10651699	dmel-5.43-X	10643110	10651699	-	dmel-5.43-X::10636716-10673011	FlyFos023955	46988	10636716	10673011	FlyFos023955[29186-30248]	dmel-5.43-X(-)[10643827-10643826]		grows	[NGS] validated	fully_covered;no mut;flipped	fully_covered	no mut	flipped	23	99	116	0	0	0							13820775239620986_C03	58519847_58_C_3_29186_30248_dmel-5.43-X_10643827_10643826
13820775239620986_C04	https://transgeneome.mpi-cbg.de/transgeneomics/public/clone.html?wellId=59046578	FlyFos023975(CG41320[39223]::S000169_fly_pretag)::2XTY1-SGFP-V5-preTEV-BLRP-3XFLAGdFRT	FBgn0085612	CG41320		dmel-5.43-3LHet(+)::1532480-1545940	dmel-5.43-3LHet	1532480	1545940	+	dmel-5.43-3LHet::1516263-1551606	FlyFos023975	46036	1516263	1551606	FlyFos023975[29594-30656]	dmel-5.43-3LHet(+)[1516263-1551606]		grows	[NGS] validated	fully_covered;no mut;flipped	fully_covered	no mut	flipped	24	143	118	0	0	0							13820775239620986_C04	58519847_58_C_4_29594_30656_dmel-5.43-3LHet_1516263_1551606
13820775239620986_C07	https://transgeneome.mpi-cbg.de/transgeneomics/public/clone.html?wellId=59046770	FlyFos024021(CG2336[25747]::S000169_fly_pretag)::2XTY1-SGFP-V5-preTEV-BLRP-3XFLAGdFRT	FBgn0037455	CG2336		dmel-5.43-3R(+)::2406506-2407993	dmel-5.43-3R	2406506	2407993	+	dmel-5.43-3R::2384931-2423851	FlyFos024021	49613	2384931	2423851	FlyFos024021[16118-17180]	dmel-5.43-3R(+)[2407735-2407734]		grows	[NGS] validated	fully_covered;no mut;flipped	fully_covered	no mut	flipped	38	235	239	0	0	0							13820775239620986_C07	58519847_58_C_7_16118_17180_dmel-5.43-3R_2407735_2407734
13820775239620986_C08	https://transgeneome.mpi-cbg.de/transgeneomics/public/clone.html?wellId=59046834	FlyFos024037(CG30493[21126]::S000169_fly_pretag)::2XTY1-SGFP-V5-preTEV-BLRP-3XFLAGdFRT	FBgn0050493	CG30493	CG1952	dmel-5.43-2R(+)::3586786-3591006	dmel-5.43-2R	3586786	3591006	+	dmel-5.43-2R::3578986-3622300	FlyFos024037	54007	3578986	3622300	FlyFos024037[11497-12559]	dmel-5.43-2R(+)[3578986-3622300]		grows	[NGS] validated	fully_covered;no mut;flipped	fully_covered	no mut	flipped	20	92	94	0	0	0							13820775239620986_C08	58519847_58_C_8_11497_12559_dmel-5.43-2R_3578986_3622300
13820775239620986_C10	https://transgeneome.mpi-cbg.de/transgeneomics/public/clone.html?wellId=59046962	FlyFos024067(CG7606[31850]::S000169_fly_pretag)::2XTY1-SGFP-V5-preTEV-BLRP-3XFLAGdFRT	FBgn0040565	CG7606		dmel-5.43-3R(+)::13422258-13422639	dmel-5.43-3R	13422258	13422639	+	dmel-5.43-3R::13400263-13434168	FlyFos024067	44598	13400263	13434168	FlyFos024067[22221-23283]	dmel-5.43-3R(+)[13400263-13434168]		grows	[NGS] validated	fully_covered;no mut;flipped	fully_covered	no mut	flipped	37	222	132	0	0	0							13820775239620986_C10	58519847_58_C_10_22221_23283_dmel-5.43-3R_13400263_13434168
13820775239620986_C11	https://transgeneome.mpi-cbg.de/transgeneomics/public/clone.html?wellId=59047026	FlyFos024091(CG13933[18250]::S000169_fly_pretag)::2XTY1-SGFP-V5-preTEV-BLRP-3XFLAGdFRT	FBgn0035270	CG13933	dmASBa	dmel-5.43-3L(-)::1771809-1775143	dmel-5.43-3L	1771809	1775143	-	dmel-5.43-3L::1763985-1795586	FlyFos024091	42294	1763985	1795586	FlyFos024091[8621-9683]	dmel-5.43-3L(-)[1763985-1795586]		grows	[NGS] validated	fully_covered;no mut;flipped	fully_covered	no mut	flipped	41	243	268	0	0	0							13820775239620986_C11	58519847_58_C_11_8621_9683_dmel-5.43-3L_1763985_1795586
13820775239620986_D02	https://transgeneome.mpi-cbg.de/transgeneomics/public/clone.html?wellId=59046458	FlyFos023947(CG32638[32670]::S000169_fly_pretag)::2XTY1-SGFP-V5-preTEV-BLRP-3XFLAGdFRT	FBgn0052638	CG32638		dmel-5.43-X(-)::13016909-13022827	dmel-5.43-X	13016909	13022827	-	dmel-5.43-X::12999195-13040548	FlyFos023947	52046	12999195	13040548	FlyFos023947[23041-24103]	dmel-5.43-X(-)[13017509-13017508]		grows	[NGS] validated	fully_covered;no mut;flipped	fully_covered	no mut	flipped	29	90	165	0	0	0							13820775239620986_D02	58519847_58_D_2_23041_24103_dmel-5.43-X_13017509_13017508
13820775239620986_D03	https://transgeneome.mpi-cbg.de/transgeneomics/public/clone.html?wellId=59046522	FlyFos023959(CG4164[37698]::S000169_fly_pretag)::2XTY1-SGFP-V5-preTEV-BLRP-3XFLAGdFRT	FBgn0031256	CG4164		dmel-5.43-2L(+)::453111-454654	dmel-5.43-2L	453111	454654	+	dmel-5.43-2L::426315-468784	FlyFos023959	53162	426315	468784	FlyFos023959[28069-29131]	dmel-5.43-2L(+)[426315-468784]		grows	[NGS] validated	fully_covered;no mut;flipped	fully_covered	no mut	flipped	21	116	93	0	0	0							13820775239620986_D03	58519847_58_D_3_28069_29131_dmel-5.43-2L_426315_468784
13820775239620986_D04	https://transgeneome.mpi-cbg.de/transgeneomics/public/clone.html?wellId=59046586	FlyFos023983(gprs[20441]::S000169_fly_pretag)::2XTY1-SGFP-V5-preTEV-BLRP-3XFLAGdFRT	FBgn0024232	gprs	gprs, CG18471, CG5967, Gprs	dmel-5.43-2R(+)::12528745-12536284	dmel-5.43-2R	12528745	12536284	+	dmel-5.43-2R::12506979-12547092	FlyFos023983	50806	12506979	12547092	FlyFos023983[10812-11874]	dmel-5.43-2R(+)[12536282-12536281]		grows	[NGS] validated	fully_covered;no mut;flipped	fully_covered	no mut	flipped	17	84	70	0	0	0							13820775239620986_D04	58519847_58_D_4_10812_11874_dmel-5.43-2R_12536282_12536281
13820775239620986_D08	https://transgeneome.mpi-cbg.de/transgeneomics/public/clone.html?wellId=59046842	FlyFos024037(CG1941[30047]::S000169_fly_pretag)::2XTY1-SGFP-V5-preTEV-BLRP-3XFLAGdFRT	FBgn0033214	CG1941		dmel-5.43-2R(+)::3597379-3599494	dmel-5.43-2R	3597379	3599494	+	dmel-5.43-2R::3578986-3622300	FlyFos024037	54007	3578986	3622300	FlyFos024037[20418-21480]	dmel-5.43-2R(+)[3578986-3622300]		grows	[NGS] validated	fully_covered;no mut;flipped	fully_covered	no mut	flipped	19	66	82	0	0	0							13820775239620986_D08	58519847_58_D_8_20418_21480_dmel-5.43-2R_3578986_3622300
13820775239620986_D10	https://transgeneome.mpi-cbg.de/transgeneomics/public/clone.html?wellId=59046970	FlyFos024067(CG7587[30060]::S000169_fly_pretag)::2XTY1-SGFP-V5-preTEV-BLRP-3XFLAGdFRT	FBgn0038523	CG7587		dmel-5.43-3R(+)::13420108-13420783	dmel-5.43-3R	13420108	13420783	+	dmel-5.43-3R::13400263-13434168	FlyFos024067	44598	13400263	13434168	FlyFos024067[20431-21493]	dmel-5.43-3R(+)[13400263-13434168]		grows	[NGS] validated	fully_covered;no mut;flipped	fully_covered	no mut	flipped	29	182	182	0	0	0							13820775239620986_D10	58519847_58_D_10_20431_21493_dmel-5.43-3R_13400263_13434168
13820775239620986_D11	https://transgeneome.mpi-cbg.de/transgeneomics/public/clone.html?wellId=59047034	FlyFos024091(CG2021[22691]::S000169_fly_pretag)::2XTY1-SGFP-V5-preTEV-BLRP-3XFLAGdFRT	FBgn0035271	CG2021		dmel-5.43-3L(-)::1777008-1777363	dmel-5.43-3L	1777008	1777363	-	dmel-5.43-3L::1763985-1795586	FlyFos024091	42294	1763985	1795586	FlyFos024091[13062-14124]	dmel-5.43-3L(-)[1763985-1795586]		grows	[NGS] validated	fully_covered;no mut;flipped	fully_covered	no mut	flipped	38	272	297	0	0	0							13820775239620986_D11	58519847_58_D_11_13062_14124_dmel-5.43-3L_1763985_1795586
13820775239620986_D12	https://transgeneome.mpi-cbg.de/transgeneomics/public/clone.html?wellId=59047098	FlyFos024109(CG11638[15717]::S000169_fly_pretag)::2XTY1-SGFP-V5-preTEV-BLRP-3XFLAGdFRT	FBgn0040351	CG11638	EG:BACR7A4.12	dmel-5.43-X(-)::908017-920736	dmel-5.43-X	908017	920736	-	dmel-5.43-X::902856-941128	FlyFos024109	48965	902856	941128	FlyFos024109[6088-7150]	dmel-5.43-X(-)[902856-941128]		grows	[NGS] validated	fully_covered;no mut;flipped	fully_covered	no mut	flipped	27	78	187	0	0	0							13820775239620986_D12	58519847_58_D_12_6088_7150_dmel-5.43-X_902856_941128
13820775239620986_E01	https://transgeneome.mpi-cbg.de/transgeneomics/public/clone.html?wellId=59046402	FlyFos023927(CG9175[32762]::S000169_fly_pretag)::2XTY1-SGFP-V5-preTEV-BLRP-3XFLAGdFRT	FBgn0031779	CG9175	Sec12	dmel-5.43-2L(-)::6096698-6098964	dmel-5.43-2L	6096698	6098964	-	dmel-5.43-2L::6085812-6120302	FlyFos023927	45183	6085812	6120302	FlyFos023927[23133-24195]	dmel-5.43-2L(-)[6097171-6097170]		grows	[NGS] validated	fully_covered;no mut;flipped	fully_covered	no mut	flipped	17	76	120	0	0	0							13820775239620986_E01	58519847_58_E_1_23133_24195_dmel-5.43-2L_6097171_6097170
13820775239620986_E03	https://transgeneome.mpi-cbg.de/transgeneomics/public/clone.html?wellId=59046530	FlyFos023959(CG4133[41703]::S000169_fly_pretag)::2XTY1-SGFP-V5-preTEV-BLRP-3XFLAGdFRT	FBgn0031257	CG4133		dmel-5.43-2L(+)::455543-458745	dmel-5.43-2L	455543	458745	+	dmel-5.43-2L::426315-468784	FlyFos023959	53162	426315	468784	FlyFos023959[32074-33136]	dmel-5.43-2L(+)[426315-468784]		grows	[NGS] validated	fully_covered;no mut;flipped	fully_covered	no mut	flipped	18	95	104	0	0	0							13820775239620986_E03	58519847_58_E_3_32074_33136_dmel-5.43-2L_426315_468784
13820775239620986_E04	https://transgeneome.mpi-cbg.de/transgeneomics/public/clone.html?wellId=59046594	FlyFos023983(Alk[40142]::S000169_fly_pretag)::2XTY1-SGFP-V5-preTEV-BLRP-3XFLAGdFRT	FBgn0040505	Alk	Alk, anaplastic lymphoma kinase, Anaplastic Lymphoma Kinase, Anaplastic lymphoma kinase, ALK, mili, dALK, DAlk, DAlk53, CG8250	dmel-5.43-2R(-)::12513590-12525279	dmel-5.43-2R	12513590	12525279	-	dmel-5.43-2R::12506979-12547092	FlyFos023983	50806	12506979	12547092	FlyFos023983[30513-31575]	dmel-5.43-2R(-)[12516581-12516580]		grows	[NGS] validated	fully_covered;no mut;flipped	fully_covered	no mut	flipped	40	199	188	0	0	0							13820775239620986_E04	58519847_58_E_4_30513_31575_dmel-5.43-2R_12516581_12516580
13820775239620986_E05	https://transgeneome.mpi-cbg.de/transgeneomics/public/clone.html?wellId=59046658	FlyFos023995(Scgalpha[33502]::S000169_fly_pretag)::2XTY1-SGFP-V5-preTEV-BLRP-3XFLAGdFRT	FBgn0032013	Scgalpha	Sarcoglycan alpha, Scga, DmSCG-alphaepsilon, Scgalpha, CG7851	dmel-5.43-2L(+)::8303433-8305376	dmel-5.43-2L	8303433	8305376	+	dmel-5.43-2L::8292851-8329032	FlyFos023995	46874	8292851	8329032	FlyFos023995[23873-24935]	dmel-5.43-2L(+)[8305161-8305160]		grows	[NGS] validated	fully_covered;no mut;flipped	fully_covered	no mut	flipped	25	111	119	0	0	0							13820775239620986_E05	58519847_58_E_5_23873_24935_dmel-5.43-2L_8305161_8305160
13820775239620986_E06	https://transgeneome.mpi-cbg.de/transgeneomics/public/clone.html?wellId=59046722	FlyFos024006(CG5142[17411]::S000169_fly_pretag)::2XTY1-SGFP-V5-preTEV-BLRP-3XFLAGdFRT	FBgn0032470	CG5142		dmel-5.43-2L(+)::13106871-13109468	dmel-5.43-2L	13106871	13109468	+	dmel-5.43-2L::13076299-13117187	FlyFos024006	51581	13076299	13117187	FlyFos024006[7782-8844]	dmel-5.43-2L(+)[13109407-13109406]		grows	[NGS] validated	fully_covered;no mut;flipped	fully_covered	no mut	flipped	23	137	149	0	0	0							13820775239620986_E06	58519847_58_E_6_7782_8844_dmel-5.43-2L_13109407_13109406
13820775239620986_E07	https://transgeneome.mpi-cbg.de/transgeneomics/public/clone.html?wellId=59046786	FlyFos024024(CG9989[34163]::S000169_fly_pretag)::2XTY1-SGFP-V5-preTEV-BLRP-3XFLAGdFRT	FBgn0039593	CG9989		dmel-5.43-3R(+)::24496458-24497743	dmel-5.43-3R	24496458	24497743	+	dmel-5.43-3R::24473141-24505682	FlyFos024024	43234	24473141	24505682	FlyFos024024[24534-25596]	dmel-5.43-3R(+)[24473141-24505682]		grows	[NGS] validated	fully_covered;no mut;flipped	fully_covered	no mut	flipped	48	284	298	0	0	0							13820775239620986_E07	58519847_58_E_7_24534_25596_dmel-5.43-3R_24473141_24505682
13820775239620986_E08	https://transgeneome.mpi-cbg.de/transgeneomics/public/clone.html?wellId=59046850	FlyFos024037(CG1942[32267]::S000169_fly_pretag)::2XTY1-SGFP-V5-preTEV-BLRP-3XFLAGdFRT	FBgn0033215	CG1942		dmel-5.43-2R(+)::3600128-3601695	dmel-5.43-2R	3600128	3601695	+	dmel-5.43-2R::3578986-3622300	FlyFos024037	54007	3578986	3622300	FlyFos024037[22638-23700]	dmel-5.43-2R(+)[3578986-3622300]		grows	[NGS] validated	fully_covered;no mut;flipped	fully_covered	no mut	flipped	21	83	79	0	0	0							13820775239620986_E08	58519847_58_E_8_22638_23700_dmel-5.43-2R_3578986_3622300
13820775239620986_E09	https://transgeneome.mpi-cbg.de/transgeneomics/public/clone.html?wellId=59046914	FlyFos024058(SmB[31161]::S000169_fly_pretag)::2XTY1-SGFP-V5-preTEV-BLRP-3XFLAGdFRT	FBgn0262601	SmB	Small ribonucleoprotein particle protein SmB, Small ribonucleoprotein particle protein B, lethal (2) SH0509, polypeptide B, snRNP B, SYM10, B, Sm B, l(2)SH0509, CG5352, l(2)SH2 0509	dmel-5.43-2L(-)::10425483-10426791	dmel-5.43-2L	10425483	10426791	-	dmel-5.43-2L::10407916-10447061	FlyFos024058	49838	10407916	10447061	FlyFos024058[21532-22594]	dmel-5.43-2L(-)[10425531-10425530]		grows	[NGS] validated	fully_covered;no mut;flipped	fully_covered	no mut	flipped	28	131	105	0	0	0							13820775239620986_E09	58519847_58_E_9_21532_22594_dmel-5.43-2L_10425531_10425530
13820775239620986_E10	https://transgeneome.mpi-cbg.de/transgeneomics/public/clone.html?wellId=59046978	FlyFos024075(CG5084[33910]::S000169_fly_pretag)::2XTY1-SGFP-V5-preTEV-BLRP-3XFLAGdFRT	FBgn0034288	CG5084		dmel-5.43-2R(+)::13906171-13907297	dmel-5.43-2R	13906171	13907297	+	dmel-5.43-2R::13887756-13931544	FlyFos024075	54481	13887756	13931544	FlyFos024075[24281-25343]	dmel-5.43-2R(+)[13907265-13907264]		grows	[NGS] validated	fully_covered;no mut;flipped	fully_covered	no mut	flipped	35	189	165	0	0	0							13820775239620986_E10	58519847_58_E_10_24281_25343_dmel-5.43-2R_13907265_13907264
13820775239620986_E11	https://transgeneome.mpi-cbg.de/transgeneomics/public/clone.html?wellId=59047042	FlyFos024094(CG8102[17238]::S000169_fly_pretag)::2XTY1-SGFP-V5-preTEV-BLRP-3XFLAGdFRT	FBgn0034007	CG8102	NADH:ubiquinone oxidoreductase 51 kDa subunit	dmel-5.43-2R(-)::11184269-11185834	dmel-5.43-2R	11184269	11185834	-	dmel-5.43-2R::11176737-11212044	FlyFos024094	46000	11176737	11212044	FlyFos024094[7609-8671]	dmel-5.43-2R(-)[11176737-11212044]		grows	[NGS] validated	fully_covered;no mut;flipped	fully_covered	no mut	flipped	25	139	156	0	0	0							13820775239620986_E11	58519847_58_E_11_7609_8671_dmel-5.43-2R_11176737_11212044
13820775239620986_E12	https://transgeneome.mpi-cbg.de/transgeneomics/public/clone.html?wellId=59047106	FlyFos024109(CG33082[32258]::S000169_fly_pretag)::2XTY1-SGFP-V5-preTEV-BLRP-3XFLAGdFRT	FBgn0053082	CG33082		dmel-5.43-X(+)::924791-925645	dmel-5.43-X	924791	925645	+	dmel-5.43-X::902856-941128	FlyFos024109	48965	902856	941128	FlyFos024109[22629-23691]	dmel-5.43-X(+)[902856-941128]		grows	[NGS] validated	fully_covered;no mut;flipped	fully_covered	no mut	flipped	28	244	48	0	0	0							13820775239620986_E12	58519847_58_E_12_22629_23691_dmel-5.43-X_902856_941128
13820775239620986_F02	https://transgeneome.mpi-cbg.de/transgeneomics/public/clone.html?wellId=59046474	FlyFos023949(CG10081[25258]::S000169_fly_pretag)::2XTY1-SGFP-V5-preTEV-BLRP-3XFLAGdFRT	FBgn0034441	CG10081		dmel-5.43-2R(+)::15273429-15276823	dmel-5.43-2R	15273429	15276823	+	dmel-5.43-2R::15251021-15292383	FlyFos023949	52055	15251021	15292383	FlyFos023949[15629-16691]	dmel-5.43-2R(+)[15276756-15276755]		grows	[NGS] validated	fully_covered;no mut;flipped	fully_covered	no mut	flipped	28	119	108	0	0	0							13820775239620986_F02	58519847_58_F_2_15629_16691_dmel-5.43-2R_15276756_15276755
13820775239620986_F03	https://transgeneome.mpi-cbg.de/transgeneomics/public/clone.html?wellId=59046538	FlyFos023973(CG7611[18353]::S000169_fly_pretag)::2XTY1-SGFP-V5-preTEV-BLRP-3XFLAGdFRT	FBgn0037094	CG7611	WDR26	dmel-5.43-3L(+)::21516278-21521263	dmel-5.43-3L	21516278	21521263	+	dmel-5.43-3L::21497125-21529484	FlyFos023973	43052	21497125	21529484	FlyFos023973[8724-9786]	dmel-5.43-3L(+)[21520762-21520761]		grows	[NGS] validated	fully_covered;no mut;flipped	fully_covered	no mut	flipped	32	151	138	0	0	0							13820775239620986_F03	58519847_58_F_3_8724_9786_dmel-5.43-3L_21520762_21520761
13820775239620986_F04	https://transgeneome.mpi-cbg.de/transgeneomics/public/clone.html?wellId=59046602	FlyFos023986(Dhc62B[33992]::S000169_fly_pretag)::2XTY1-SGFP-V5-preTEV-BLRP-3XFLAGdFRT	FBgn0013811	Dhc62B	Dynein heavy chain at 62B, Dynein Heavy chain 62B, dynein-related heavy chain polypeptide, dhc, DHC, CG15804, Dhc, CG18613	dmel-5.43-3L(-)::1759172-1771650	dmel-5.43-3L	1759172	1771650	-	dmel-5.43-3L::1753027-1783623	FlyFos023986	41289	1753027	1783623	FlyFos023986[24363-25425]	dmel-5.43-3L(-)[1759262-1759261]		grows	[NGS] validated	fully_covered;no mut;flipped	fully_covered	no mut	flipped	25	109	115	0	0	0							13820775239620986_F04	58519847_58_F_4_24363_25425_dmel-5.43-3L_1759262_1759261
13820775239620986_F05	https://transgeneome.mpi-cbg.de/transgeneomics/public/clone.html?wellId=59046666	FlyFos023999(CG14007[38906]::S000169_fly_pretag)::2XTY1-SGFP-V5-preTEV-BLRP-3XFLAGdFRT	FBgn0031731	CG14007		dmel-5.43-2L(-)::5715491-5716650	dmel-5.43-2L	5715491	5716650	-	dmel-5.43-2L::5703928-5744769	FlyFos023999	51534	5703928	5744769	FlyFos023999[29277-30339]	dmel-5.43-2L(-)[5715494-5715493]		grows	[NGS] validated	fully_covered;no mut;flipped	fully_covered	no mut	flipped	6	30	23	0	0	0							13820775239620986_F05	58519847_58_F_5_29277_30339_dmel-5.43-2L_5715494_5715493
13820775239620986_F06	https://transgeneome.mpi-cbg.de/transgeneomics/public/clone.html?wellId=59046730	FlyFos024011(Lsp1beta[24805]::S000169_fly_pretag)::2XTY1-SGFP-V5-preTEV-BLRP-3XFLAGdFRT	FBgn0002563	Lsp1beta	Larval serum protein 1 beta, larval serum protein 1beta, Larval serum protein 1 beta, Larval serum protein 1[beta], LSP1, Lsp1, LSP-1, Lsp1b, Lsp1beta, Lsp-1b, Lsp-1beta, LSP-1beta, Lsp1[beta], CG4178, LSP-1 beta, LSP 1, Lsp1-beta, DmeLSP1b, LSP1beta	dmel-5.43-2L(+)::898647-901320	dmel-5.43-2L	898647	901320	+	dmel-5.43-2L::873596-916341	FlyFos024011	53438	873596	916341	FlyFos024011[15176-16238]	dmel-5.43-2L(+)[901167-901166]		grows	[NGS] validated	fully_covered;no mut;flipped	fully_covered	no mut	flipped	20	100	111	0	0	0							13820775239620986_F06	58519847_58_F_6_15176_16238_dmel-5.43-2L_901167_901166
13820775239620986_F07	https://transgeneome.mpi-cbg.de/transgeneomics/public/clone.html?wellId=59046794	FlyFos024024(CG33346[32660]::S000169_fly_pretag)::2XTY1-SGFP-V5-preTEV-BLRP-3XFLAGdFRT	FBgn0053346	CG33346		dmel-5.43-3R(+)::24494955-24496174	dmel-5.43-3R	24494955	24496174	+	dmel-5.43-3R::24473141-24505682	FlyFos024024	43234	24473141	24505682	FlyFos024024[23031-24093]	dmel-5.43-3R(+)[24473141-24505682]		grows	[NGS] validated	fully_covered;no mut;flipped	fully_covered	no mut	flipped	38	281	147	0	0	0							13820775239620986_F07	58519847_58_F_7_23031_24093_dmel-5.43-3R_24473141_24505682
13820775239620986_F08	https://transgeneome.mpi-cbg.de/transgeneomics/public/clone.html?wellId=59046858	FlyFos024037(CG1946[34849]::S000169_fly_pretag)::2XTY1-SGFP-V5-preTEV-BLRP-3XFLAGdFRT	FBgn0033216	CG1946		dmel-5.43-2R(+)::3602445-3604286	dmel-5.43-2R	3602445	3604286	+	dmel-5.43-2R::3578986-3622300	FlyFos024037	54007	3578986	3622300	FlyFos024037[25220-26282]	dmel-5.43-2R(+)[3578986-3622300]		grows	[NGS] validated	fully_covered;no mut;flipped	fully_covered	no mut	flipped	24	134	116	0	0	0							13820775239620986_F08	58519847_58_F_8_25220_26282_dmel-5.43-2R_3578986_3622300
13820775239620986_F09	https://transgeneome.mpi-cbg.de/transgeneomics/public/clone.html?wellId=59046922	FlyFos024058(pie[35861]::S000169_fly_pretag)::2XTY1-SGFP-V5-preTEV-BLRP-3XFLAGdFRT	FBgn0005683	pie	pineapple eye, lethal(2)54, maternal effect early arrest E, rumpled, l(2)31Ek, mat(2)QM47, mat(2)earlyQM47, CG5354, mat(2)ea-E, l(2)54	dmel-5.43-2L(-)::10420711-10422781	dmel-5.43-2L	10420711	10422781	-	dmel-5.43-2L::10407916-10447061	FlyFos024058	49838	10407916	10447061	FlyFos024058[26232-27294]	dmel-5.43-2L(-)[10420831-10420830]		grows	[NGS] validated	fully_covered;no mut;flipped	fully_covered	no mut	flipped	30	103	95	0	0	0							13820775239620986_F09	58519847_58_F_9_26232_27294_dmel-5.43-2L_10420831_10420830
13820775239620986_F10	https://transgeneome.mpi-cbg.de/transgeneomics/public/clone.html?wellId=59046986	FlyFos024075(CG10910[31361]::S000169_fly_pretag)::2XTY1-SGFP-V5-preTEV-BLRP-3XFLAGdFRT	FBgn0034289	CG10910		dmel-5.43-2R(+)::13907754-13909911	dmel-5.43-2R	13907754	13909911	+	dmel-5.43-2R::13887756-13931544	FlyFos024075	54481	13887756	13931544	FlyFos024075[21732-22794]	dmel-5.43-2R(+)[13909814-13909813]		grows	[NGS] validated	fully_covered;no mut;flipped	fully_covered	no mut	flipped	25	105	100	0	0	0							13820775239620986_F10	58519847_58_F_10_21732_22794_dmel-5.43-2R_13909814_13909813
13820775239620986_F11	https://transgeneome.mpi-cbg.de/transgeneomics/public/clone.html?wellId=59047050	FlyFos024095(CG15418[34961]::S000169_fly_pretag)::2XTY1-SGFP-V5-preTEV-BLRP-3XFLAGdFRT	FBgn0031554	CG15418		dmel-5.43-2L(-)::3621090-3621681	dmel-5.43-2L	3621090	3621681	-	dmel-5.43-2L::3612700-3646482	FlyFos024095	44475	3612700	3646482	FlyFos024095[25332-26394]	dmel-5.43-2L(-)[3621152-3621151]		grows	[NGS] validated	fully_covered;no mut;flipped	fully_covered	no mut	flipped	44	249	305	0	0	0							13820775239620986_F11	58519847_58_F_11_25332_26394_dmel-5.43-2L_3621152_3621151
13820775239620986_F12	https://transgeneome.mpi-cbg.de/transgeneomics/public/clone.html?wellId=59047114	FlyFos024110(CG10417[33410]::S000169_fly_pretag)::2XTY1-SGFP-V5-preTEV-BLRP-3XFLAGdFRT	FBgn0033021	CG10417	PP2Cg	dmel-5.43-2R(-)::1247831-1250608	dmel-5.43-2R	1247831	1250608	-	dmel-5.43-2R::1232252-1271875	FlyFos024110	50316	1232252	1271875	FlyFos024110[23781-24843]	dmel-5.43-2R(-)[1248096-1248095]		grows	[NGS] validated	fully_covered;no mut;flipped	fully_covered	no mut	flipped	31	171	149	0	0	0							13820775239620986_F12	58519847_58_F_12_23781_24843_dmel-5.43-2R_1248096_1248095
13820775239620986_G01	https://transgeneome.mpi-cbg.de/transgeneomics/public/clone.html?wellId=59046418	FlyFos023933(CG42809[19281]::S000169_fly_pretag)::2XTY1-SGFP-V5-preTEV-BLRP-3XFLAGdFRT	FBgn0261991	CG42809	CG16849	dmel-5.43-2L(+)::13457636-13458073	dmel-5.43-2L	13457636	13458073	+	dmel-5.43-2L::13433391-13467721	FlyFos023933	45023	13433391	13467721	FlyFos023933[9652-10714]	dmel-5.43-2L(+)[13458071-13458070]		grows	[NGS] validated	fully_covered;no mut;flipped	fully_covered	no mut	flipped	31	180	138	0	0	0							13820775239620986_G01	58519847_58_G_1_9652_10714_dmel-5.43-2L_13458071_13458070
13820775239620986_G02	https://transgeneome.mpi-cbg.de/transgeneomics/public/clone.html?wellId=59046482	FlyFos023951(CG42826[35885]::S000169_fly_pretag)::2XTY1-SGFP-V5-preTEV-BLRP-3XFLAGdFRT	FBgn0262008	CG42826	CG6640	dmel-5.43-3L(-)::10092457-10093981	dmel-5.43-3L	10092457	10093981	-	dmel-5.43-3L::10083374-10118714	FlyFos023951	46033	10083374	10118714	FlyFos023951[26256-27318]	dmel-5.43-3L(-)[10092460-10092459]		grows	[NGS] validated	fully_covered;no mut;flipped	fully_covered	no mut	flipped	26	148	122	0	0	0							13820775239620986_G02	58519847_58_G_2_26256_27318_dmel-5.43-3L_10092460_10092459
13820775239620986_G04	https://transgeneome.mpi-cbg.de/transgeneomics/public/clone.html?wellId=59046610	FlyFos023991(Top1[23251]::S000169_fly_pretag)::2XTY1-SGFP-V5-preTEV-BLRP-3XFLAGdFRT	FBgn0004924	Top1	Topoisomerase 1, topoisomerase I, type I topoisomerase, Topoisomerase I, topoisomerase1, CG6146, topo I, TopoI, top1, Topo I, l(1)G0278, TOP1, l(1)G0134, TopI, l(1)top1, l(1)G0201, l(1)G0229, dTopoI, topoI	dmel-5.43-X(+)::15213525-15222062	dmel-5.43-X	15213525	15222062	+	dmel-5.43-X::15206328-15240741	FlyFos023991	45106	15206328	15240741	FlyFos023991[13622-14684]	dmel-5.43-X(+)[15206328-15240741]		grows	[NGS] validated	fully_covered;no mut;flipped	fully_covered	no mut	flipped	32	196	198	0	0	0							13820775239620986_G04	58519847_58_G_4_13622_14684_dmel-5.43-X_15206328_15240741
13820775239620986_G05	https://transgeneome.mpi-cbg.de/transgeneomics/public/clone.html?wellId=59046674	FlyFos023999(CG11149[35996]::S000169_fly_pretag)::2XTY1-SGFP-V5-preTEV-BLRP-3XFLAGdFRT	FBgn0031732	CG11149		dmel-5.43-2L(-)::5718121-5720896	dmel-5.43-2L	5718121	5720896	-	dmel-5.43-2L::5703928-5744769	FlyFos023999	51534	5703928	5744769	FlyFos023999[26367-27429]	dmel-5.43-2L(-)[5718404-5718403]		grows	[NGS] validated	fully_covered;no mut;flipped	fully_covered	no mut	flipped	32	152	158	0	0	0							13820775239620986_G05	58519847_58_G_5_26367_27429_dmel-5.43-2L_5718404_5718403
13820775239620986_G06	https://transgeneome.mpi-cbg.de/transgeneomics/public/clone.html?wellId=59046738	FlyFos024012(CG11404[27659]::S000169_fly_pretag)::2XTY1-SGFP-V5-preTEV-BLRP-3XFLAGdFRT	FBgn0037169	CG11404	BcDNA:GH11730	dmel-5.43-3L(+)::22541537-22542407	dmel-5.43-3L	22541537	22542407	+	dmel-5.43-3L::22528404-22560255	FlyFos024012	42544	22528404	22560255	FlyFos024012[18030-19092]	dmel-5.43-3L(+)[22542227-22542226]		grows	[NGS] validated	fully_covered;no mut;flipped	fully_covered	no mut	flipped	10	50	39	0	0	0							13820775239620986_G06	58519847_58_G_6_18030_19092_dmel-5.43-3L_22542227_22542226
13820775239620986_G07	https://transgeneome.mpi-cbg.de/transgeneomics/public/clone.html?wellId=59046802	FlyFos024027(CG31477[23958]::S000169_fly_pretag)::2XTY1-SGFP-V5-preTEV-BLRP-3XFLAGdFRT	FBgn0051477	CG31477	ATP synthase Epsilon chain, CG12810	dmel-5.43-3R(+)::5947523-5948042	dmel-5.43-3R	5947523	5948042	+	dmel-5.43-3R::5919748-5962267	FlyFos024027	53212	5919748	5962267	FlyFos024027[14329-15391]	dmel-5.43-3R(+)[5947940-5947939]		grows	[NGS] validated	fully_covered;no mut;flipped	fully_covered	no mut	flipped	20	130	62	0	0	0							13820775239620986_G07	58519847_58_G_7_14329_15391_dmel-5.43-3R_5947940_5947939
13820775239620986_G09	https://transgeneome.mpi-cbg.de/transgeneomics/public/clone.html?wellId=59046930	FlyFos024058(CG5198[19525]::S000169_fly_pretag)::2XTY1-SGFP-V5-preTEV-BLRP-3XFLAGdFRT	FBgn0032250	CG5198		dmel-5.43-2L(+)::10435991-10437317	dmel-5.43-2L	10435991	10437317	+	dmel-5.43-2L::10407916-10447061	FlyFos024058	49838	10407916	10447061	FlyFos024058[9896-10958]	dmel-5.43-2L(+)[10437167-10437166]		grows	[NGS] validated	fully_covered;no mut;flipped	fully_covered	no mut	flipped	26	101	99	0	0	0							13820775239620986_G09	58519847_58_G_9_9896_10958_dmel-5.43-2L_10437167_10437166
13820775239620986_H02	https://transgeneome.mpi-cbg.de/transgeneomics/public/clone.html?wellId=59046490	FlyFos023952(CG43647[20433]::S000169_fly_pretag)::2XTY1-SGFP-V5-preTEV-BLRP-3XFLAGdFRT	FBgn0263656	CG43647	mlncRNA42E5-1	dmel-5.43-2R(+)::2907638-2908251	dmel-5.43-2R	2907638	2908251	+	dmel-5.43-2R::2883371-2919051	FlyFos023952	46373	2883371	2919051	FlyFos023952[10804-11866]	dmel-5.43-2R(+)[2908249-2908248]		grows	[NGS] validated	fully_covered;no mut;flipped	fully_covered	no mut	flipped	3	23	13	0	0	0							13820775239620986_H02	58519847_58_H_2_10804_11866_dmel-5.43-2R_2908249_2908248
13820775239620986_H03	https://transgeneome.mpi-cbg.de/transgeneomics/public/clone.html?wellId=59046554	FlyFos023974(Npc2h[29190]::S000169_fly_pretag)::2XTY1-SGFP-V5-preTEV-BLRP-3XFLAGdFRT	FBgn0039801	Npc2h	Niemann-Pick type C-2h, CG11315, npc2h, BcDNA:RH68460, BcDNA:GH26608, BcDNA:RH04252, DmML1A, CG11315	dmel-5.43-3R(-)::26571201-26572010	dmel-5.43-3R	26571201	26572010	-	dmel-5.43-3R::26554945-26591071	FlyFos023974	46819	26554945	26591071	FlyFos023974[19561-20623]	dmel-5.43-3R(-)[26571512-26571511]		grows	[NGS] validated	fully_covered;no mut;flipped	fully_covered	no mut	flipped	25	125	134	0	0	0							13820775239620986_H03	58519847_58_H_3_19561_20623_dmel-5.43-3R_26571512_26571511
13820775239620986_H04	https://transgeneome.mpi-cbg.de/transgeneomics/public/clone.html?wellId=59046618	FlyFos023994(ms(2)35Ci[16196]::S000169_fly_pretag)::2XTY1-SGFP-V5-preTEV-BLRP-3XFLAGdFRT	FBgn0011239	ms(2)35Ci	ms(2)35Ci, male sterile(2)46AB, CG31733, NEST:bs29a09, BcDNA:AT28918, ms(2)02316, ms(2)46AB	dmel-5.43-2L(+)::15292545-15293774	dmel-5.43-2L	15292545	15293774	+	dmel-5.43-2L::15286693-15327993	FlyFos023994	51993	15286693	15327993	FlyFos023994[6567-7629]	dmel-5.43-2L(+)[15286693-15327993]		grows	[NGS] validated	fully_covered;no mut;flipped	fully_covered	no mut	flipped	31	171	177	0	0	0							13820775239620986_H04	58519847_58_H_4_6567_7629_dmel-5.43-2L_15286693_15327993
13820775239620986_H06	https://transgeneome.mpi-cbg.de/transgeneomics/public/clone.html?wellId=59046746	FlyFos024012(Trxr-2[24917]::S000169_fly_pretag)::2XTY1-SGFP-V5-preTEV-BLRP-3XFLAGdFRT	FBgn0037170	Trxr-2	thioredoxin reductase 2, thioredoxin-reductase-2, thioredoxin reductase, Trxr2, CG11401, Dm-TrxR, DmTrx, trxr-2, DmTrxR-2	dmel-5.43-3L(+)::22543326-22545122	dmel-5.43-3L	22543326	22545122	+	dmel-5.43-3L::22528404-22560255	FlyFos024012	42544	22528404	22560255	FlyFos024012[15288-16350]	dmel-5.43-3L(+)[22544969-22544968]		grows	[NGS] validated	fully_covered;no mut;flipped	fully_covered	no mut	flipped	29	153	128	0	0	0							13820775239620986_H06	58519847_58_H_6_15288_16350_dmel-5.43-3L_22544969_22544968
13820775239620986_H08	https://transgeneome.mpi-cbg.de/transgeneomics/public/clone.html?wellId=59046874	FlyFos024050(GAPsec[27461]::S000169_fly_pretag)::2XTY1-SGFP-V5-preTEV-BLRP-3XFLAGdFRT	FBgn0035916	GAPsec	BEST:LD24460, dGAPsec, CG5978	dmel-5.43-3L(-)::8615139-8616990	dmel-5.43-3L	8615139	8616990	-	dmel-5.43-3L::8597516-8631566	FlyFos024050	44743	8597516	8631566	FlyFos024050[17832-18894]	dmel-5.43-3L(-)[8597516-8631566]		grows	[NGS] validated	fully_covered;no mut;flipped	fully_covered	no mut	flipped	33	167	193	0	0	0							13820775239620986_H08	58519847_58_H_8_17832_18894_dmel-5.43-3L_8597516_8631566
13820775239620986_H09	https://transgeneome.mpi-cbg.de/transgeneomics/public/clone.html?wellId=59046938	FlyFos024061(mthl10[24793]::S000169_fly_pretag)::2XTY1-SGFP-V5-preTEV-BLRP-3XFLAGdFRT	FBgn0035132	mthl10	methuselah-like 10, Mth-like 10, mth-like 10, anon-WO0170980.167, anon-WO0170980.166, mth2, CG17061	dmel-5.43-3L(-)::333316-342915	dmel-5.43-3L	333316	342915	-	dmel-5.43-3L::315589-348640	FlyFos024061	43744	315589	348640	FlyFos024061[15164-16226]	dmel-5.43-3L(-)[333478-333477]		grows	[NGS] validated	fully_covered;no mut;flipped	fully_covered	no mut	flipped	16	49	88	0	0	0							13820775239620986_H09	58519847_58_H_9_15164_16226_dmel-5.43-3L_333478_333477
13820775239620986_H10	https://transgeneome.mpi-cbg.de/transgeneomics/public/clone.html?wellId=59047002	FlyFos024078(sca[41956]::S000169_fly_pretag)::2XTY1-SGFP-V5-preTEV-BLRP-3XFLAGdFRT	FBgn0003326	sca	scabrous, Fibrinogen-related protein, Scabrous, Sca, CG17579, clone 38, Sca1b, anon-EST:Liang-38, FBpp0086969, FBpp0086968, mAb sca1	dmel-5.43-2R(+)::8668049-8689515	dmel-5.43-2R	8668049	8689515	+	dmel-5.43-2R::8656113-8697173	FlyFos024078	51753	8656113	8697173	FlyFos024078[32327-33389]	dmel-5.43-2R(+)[8656113-8697173]		grows	[NGS] validated	fully_covered;no mut;flipped	fully_covered	no mut	flipped	7	28	31	0	0	0							13820775239620986_H10	58519847_58_H_10_32327_33389_dmel-5.43-2R_8656113_8697173
13820775239620986_H12	https://transgeneome.mpi-cbg.de/transgeneomics/public/clone.html?wellId=59047130	FlyFos024111(CG12866[42091]::S000169_fly_pretag)::2XTY1-SGFP-V5-preTEV-BLRP-3XFLAGdFRT	FBgn0033955	CG12866		dmel-5.43-2R(+)::10555896-10559180	dmel-5.43-2R	10555896	10559180	+	dmel-5.43-2R::10526507-10566856	FlyFos024111	51042	10526507	10566856	FlyFos024111[32462-33524]	dmel-5.43-2R(+)[10526507-10566856]		grows	[NGS] validated	fully_covered;no mut;flipped	fully_covered	no mut	flipped	18	70	74	0	0	0							13820775239620986_H12	58519847_58_H_12_32462_33524_dmel-5.43-2R_10526507_10566856
13996837788417626_A05	https://transgeneome.mpi-cbg.de/transgeneomics/public/clone.html?wellId=59071739	FlyFos029455(CG13857[29831]::S000169_fly_pretag)::2XTY1-SGFP-V5-preTEV-BLRP-3XFLAGdFRT	FBgn0038958	CG13857		dmel-5.43-3R(-)::18217911-18219826	dmel-5.43-3R	18217911	18219826	-	dmel-5.43-3R::18197033-18238415	FlyFos029455	52075	18197033	18238415	FlyFos029455[20202-21264]	dmel-5.43-3R(-)[18218215-18218214]		grows	[NGS] validated	fully_covered;no mut;flipped	fully_covered	no mut	flipped	13	45	72	0	0	0							13996837788417626_A05	58519847_91_A_5_20202_21264_dmel-5.43-3R_18218215_18218214
13996837788417626_A06	https://transgeneome.mpi-cbg.de/transgeneomics/public/clone.html?wellId=59071803	FlyFos029468(CG32241[37039]::S000169_fly_pretag)::2XTY1-SGFP-V5-preTEV-BLRP-3XFLAGdFRT	FBgn0052241	CG32241		dmel-5.43-3L(-)::4465226-4466630	dmel-5.43-3L	4465226	4466630	-	dmel-5.43-3L::4454793-4492637	FlyFos029468	48537	4454793	4492637	FlyFos029468[27410-28472]	dmel-5.43-3L(-)[4465229-4465228]		grows	[NGS] validated	fully_covered;no mut;flipped	fully_covered	no mut	flipped	25	109	113	0	0	0							13996837788417626_A06	58519847_91_A_6_27410_28472_dmel-5.43-3L_4465229_4465228
13996837788417626_A07	https://transgeneome.mpi-cbg.de/transgeneomics/public/clone.html?wellId=59071867	FlyFos029473(Lam[20245]::S000169_fly_pretag)::2XTY1-SGFP-V5-preTEV-BLRP-3XFLAGdFRT	FBgn0002525	Lam	Lamin, alpha-Lamin, lamin A, Lamin Dmo, lamin, nuclear lamin, lamin D[[m]]0, Lamin D, Lamin B, intermediate filament-like lamina, Lamin-B, Lamin Dm0, lamin D[[0]], B-type Lamin, lamin Dm[[0]], Lamin Dm[[0]], n-lamin, misrouted, lamin B, LaminDm, Lamin DmO, lethal(2)25Ec, Lamin D[[o]], B-type lamin, LaminDm0, lamin Dm0, misguided, 74/76, nlam, CG6944, Dm, Dm[[mit]], DmLamin, Dm[[2]], lamin, DmO, D…	dmel-5.43-2L(+)::5542544-5546642	dmel-5.43-2L	5542544	5546642	+	dmel-5.43-2L::5515401-5556120	FlyFos029473	51412	5515401	5556120	FlyFos029473[10616-11678]	dmel-5.43-2L(+)[5545506-5545505]		grows	[NGS] validated	fully_covered;no mut;flipped	fully_covered	no mut	flipped	19	74	108	0	0	0							13996837788417626_A07	58519847_91_A_7_10616_11678_dmel-5.43-2L_5545506_5545505
13996837788417626_A08	https://transgeneome.mpi-cbg.de/transgeneomics/public/clone.html?wellId=59071931	FlyFos029493(CG8191[24657]::S000169_fly_pretag)::2XTY1-SGFP-V5-preTEV-BLRP-3XFLAGdFRT	FBgn0030675	CG8191		dmel-5.43-X(+)::15626215-15627696	dmel-5.43-X	15626215	15627696	+	dmel-5.43-X::15603926-15642285	FlyFos029493	49052	15603926	15642285	FlyFos029493[15028-16090]	dmel-5.43-X(+)[15627259-15627258]		grows	[NGS] validated	fully_covered;no mut;flipped	fully_covered	no mut	flipped	8	37	25	0	0	0							13996837788417626_A08	58519847_91_A_8_15028_16090_dmel-5.43-X_15627259_15627258
13996837788417626_A09	https://transgeneome.mpi-cbg.de/transgeneomics/public/clone.html?wellId=59071995	FlyFos029496(CG13044[37520]::S000169_fly_pretag)::2XTY1-SGFP-V5-preTEV-BLRP-3XFLAGdFRT	FBgn0036599	CG13044		dmel-5.43-3L(-)::16295590-16296276	dmel-5.43-3L	16295590	16296276	-	dmel-5.43-3L::16289674-16323573	FlyFos029496	44592	16289674	16323573	FlyFos029496[27891-28953]	dmel-5.43-3L(-)[16295684-16295683]		grows	[NGS] validated	fully_covered;no mut;flipped	fully_covered	no mut	flipped	29	109	163	0	0	0							13996837788417626_A09	58519847_91_A_9_27891_28953_dmel-5.43-3L_16295684_16295683
13996837788417626_A10	https://transgeneome.mpi-cbg.de/transgeneomics/public/clone.html?wellId=59072059	FlyFos029509(CG4313[21344]::S000169_fly_pretag)::2XTY1-SGFP-V5-preTEV-BLRP-3XFLAGdFRT	FBgn0025632	CG4313	EG:22E5.10	dmel-5.43-X(+)::1946650-1949447	dmel-5.43-X	1946650	1949447	+	dmel-5.43-X::1924316-1960689	FlyFos029509	47066	1924316	1960689	FlyFos029509[11715-12777]	dmel-5.43-X(+)[1948976-1948975]		grows	[NGS] validated	fully_covered;no mut;flipped	fully_covered	no mut	flipped	28	191	135	0	0	0							13996837788417626_A10	58519847_91_A_10_11715_12777_dmel-5.43-X_1948976_1948975
13996837788417626_A11	https://transgeneome.mpi-cbg.de/transgeneomics/public/clone.html?wellId=59072123	FlyFos029524(CG14323[37698]::S000169_fly_pretag)::2XTY1-SGFP-V5-preTEV-BLRP-3XFLAGdFRT	FBgn0038529	CG14323		dmel-5.43-3R(-)::13447190-13447822	dmel-5.43-3R	13447190	13447822	-	dmel-5.43-3R::13438352-13475260	FlyFos029524	47601	13438352	13475260	FlyFos029524[28069-29131]	dmel-5.43-3R(-)[13447193-13447192]		grows	[NGS] validated	fully_covered;no mut;flipped	fully_covered	no mut	flipped	34	228	218	0	0	0							13996837788417626_A11	58519847_91_A_11_28069_29131_dmel-5.43-3R_13447193_13447192
13996837788417626_A12	https://transgeneome.mpi-cbg.de/transgeneomics/public/clone.html?wellId=59072187	FlyFos029540(aralar1[32857]::S000169_fly_pretag)::2XTY1-SGFP-V5-preTEV-BLRP-3XFLAGdFRT	FBgn0028646	aralar1	aralar1, CG2139, DmAralar, BcDNA:GH07418, aralar	dmel-5.43-3R(-)::26271357-26281589	dmel-5.43-3R	26271357	26281589	-	dmel-5.43-3R::26254589-26295156	FlyFos029540	51260	26254589	26295156	FlyFos029540[23228-24290]	dmel-5.43-3R(-)[26271930-26271929]		grows	[NGS] validated	fully_covered;no mut;flipped	fully_covered	no mut	flipped	14	61	64	0	0	0							13996837788417626_A12	58519847_91_A_12_23228_24290_dmel-5.43-3R_26271930_26271929
13996837788417626_B01	https://transgeneome.mpi-cbg.de/transgeneomics/public/clone.html?wellId=59071491	FlyFos029392(CG1537[27831]::S000169_fly_pretag)::2XTY1-SGFP-V5-preTEV-BLRP-3XFLAGdFRT	FBgn0030260	CG1537	BcDNA:GH02938	dmel-5.43-X(-)::10956054-10957118	dmel-5.43-X	10956054	10957118	-	dmel-5.43-X::10937960-10974396	FlyFos029392	47129	10937960	10974396	FlyFos029392[18202-19264]	dmel-5.43-X(-)[10956196-10956195]		grows	[NGS] validated	fully_covered;no mut;flipped	fully_covered	no mut	flipped	28	142	131	0	0	0							13996837788417626_B01	58519847_91_B_1_18202_19264_dmel-5.43-X_10956196_10956195
13996837788417626_B03	https://transgeneome.mpi-cbg.de/transgeneomics/public/clone.html?wellId=59071619	FlyFos029410(CG7277[35018]::S000169_fly_pretag)::2XTY1-SGFP-V5-preTEV-BLRP-3XFLAGdFRT	FBgn0031713	CG7277		dmel-5.43-2L(-)::5530620-5532195	dmel-5.43-2L	5530620	5532195	-	dmel-5.43-2L::5515415-5556104	FlyFos029410	51382	5515415	5556104	FlyFos029410[25389-26451]	dmel-5.43-2L(-)[5530717-5530716]		grows	[NGS] validated	fully_covered;no mut;flipped	fully_covered	no mut	flipped	3	5	51	0	0	0							13996837788417626_B03	58519847_91_B_3_25389_26451_dmel-5.43-2L_5530717_5530716
13996837788417626_B05	https://transgeneome.mpi-cbg.de/transgeneomics/public/clone.html?wellId=59071747	FlyFos029455(CG13855[13806]::S000169_fly_pretag)::2XTY1-SGFP-V5-preTEV-BLRP-3XFLAGdFRT	FBgn0038960	CG13855		dmel-5.43-3R(+)::18231701-18234379	dmel-5.43-3R	18231701	18234379	+	dmel-5.43-3R::18197033-18238415	FlyFos029455	52075	18197033	18238415	FlyFos029455[4177-5239]	dmel-5.43-3R(+)[18234240-18234239]		grows	[NGS] validated	fully_covered;no mut;flipped	fully_covered	no mut	flipped	13	69	57	0	0	0							13996837788417626_B05	58519847_91_B_5_4177_5239_dmel-5.43-3R_18234240_18234239
13996837788417626_B06	https://transgeneome.mpi-cbg.de/transgeneomics/public/clone.html?wellId=59071811	FlyFos029468(CG11350[17991]::S000169_fly_pretag)::2XTY1-SGFP-V5-preTEV-BLRP-3XFLAGdFRT	FBgn0035552	CG11350	CG1135	dmel-5.43-3L(+)::4482809-4484279	dmel-5.43-3L	4482809	4484279	+	dmel-5.43-3L::4454793-4492637	FlyFos029468	48537	4454793	4492637	FlyFos029468[8362-9424]	dmel-5.43-3L(+)[4484277-4484276]		grows	[NGS] validated	fully_covered;no mut;flipped	fully_covered	no mut	flipped	16	67	60	0	0	0							13996837788417626_B06	58519847_91_B_6_8362_9424_dmel-5.43-3L_4484277_4484276
13996837788417626_B07	https://transgeneome.mpi-cbg.de/transgeneomics/public/clone.html?wellId=59071875	FlyFos029474(CG7365[43387]::S000169_fly_pretag)::2XTY1-SGFP-V5-preTEV-BLRP-3XFLAGdFRT	FBgn0036939	CG7365		dmel-5.43-3L(-)::20117396-20120465	dmel-5.43-3L	20117396	20120465	-	dmel-5.43-3L::20112299-20151318	FlyFos029474	49712	20112299	20151318	FlyFos029474[33758-34820]	dmel-5.43-3L(-)[20117562-20117561]		grows	[NGS] validated	fully_covered;no mut;flipped	fully_covered	no mut	flipped	7	30	23	0	0	0							13996837788417626_B07	58519847_91_B_7_33758_34820_dmel-5.43-3L_20117562_20117561
13996837788417626_B08	https://transgeneome.mpi-cbg.de/transgeneomics/public/clone.html?wellId=59071939	FlyFos029495(CG13482[29227]::S000169_fly_pretag)::2XTY1-SGFP-V5-preTEV-BLRP-3XFLAGdFRT	FBgn0036419	CG13482		dmel-5.43-3L(+)::14322446-14322985	dmel-5.43-3L	14322446	14322985	+	dmel-5.43-3L::14303246-14336487	FlyFos029495	43934	14303246	14336487	FlyFos029495[19598-20660]	dmel-5.43-3L(+)[14303246-14336487]		grows	[NGS] validated	fully_covered;no mut;flipped	fully_covered	no mut	flipped	16	89	109	0	0	0							13996837788417626_B08	58519847_91_B_8_19598_20660_dmel-5.43-3L_14303246_14336487
13996837788417626_B09	https://transgeneome.mpi-cbg.de/transgeneomics/public/clone.html?wellId=59072003	FlyFos029496(CG43249[35516]::S000169_fly_pretag)::2XTY1-SGFP-V5-preTEV-BLRP-3XFLAGdFRT	FBgn0262894	CG43249		dmel-5.43-3L(+)::16297382-16297762	dmel-5.43-3L	16297382	16297762	+	dmel-5.43-3L::16289674-16323573	FlyFos029496	44592	16289674	16323573	FlyFos029496[25887-26949]	dmel-5.43-3L(+)[16297688-16297687]		grows	[NGS] validated	fully_covered;no mut;flipped	fully_covered	no mut	flipped	19	87	71	0	0	0							13996837788417626_B09	58519847_91_B_9_25887_26949_dmel-5.43-3L_16297688_16297687
13996837788417626_B10	https://transgeneome.mpi-cbg.de/transgeneomics/public/clone.html?wellId=59072067	FlyFos029510(Gr97a[19607]::S000169_fly_pretag)::2XTY1-SGFP-V5-preTEV-BLRP-3XFLAGdFRT	FBgn0041224	Gr97a	Gustatory receptor 97a, Gustatory receptor 97D.1, CG33083, GR97D.1, CG31074, CG31073, Gr97D1, 97D.1	dmel-5.43-3R(-)::22790866-22792194	dmel-5.43-3R	22790866	22792194	-	dmel-5.43-3R::22780892-22811412	FlyFos029510	41213	22780892	22811412	FlyFos029510[9978-11040]	dmel-5.43-3R(-)[22780892-22811412]		grows	[NGS] validated	fully_covered;no mut;flipped	fully_covered	no mut	flipped	30	230	147	0	0	0							13996837788417626_B10	58519847_91_B_10_9978_11040_dmel-5.43-3R_22780892_22811412
13996837788417626_B11	https://transgeneome.mpi-cbg.de/transgeneomics/public/clone.html?wellId=59072131	FlyFos029532(CG17242[24494]::S000169_fly_pretag)::2XTY1-SGFP-V5-preTEV-BLRP-3XFLAGdFRT	FBgn0250841	CG17242	anon-SAGE:Wang-110, anon-SAGE:Wang-110, SPH187	dmel-5.43-2L(-)::2268299-2269119	dmel-5.43-2L	2268299	2269119	-	dmel-5.43-2L::2251570-2283222	FlyFos029532	42345	2251570	2283222	FlyFos029532[14865-15927]	dmel-5.43-2L(-)[2268359-2268358]		grows	[NGS] validated	fully_covered;no mut;flipped	fully_covered	no mut	flipped	31	127	168	0	0	0							13996837788417626_B11	58519847_91_B_11_14865_15927_dmel-5.43-2L_2268359_2268358
13996837788417626_B12	https://transgeneome.mpi-cbg.de/transgeneomics/public/clone.html?wellId=59072195	FlyFos029545(Obp85a[19517]::S000169_fly_pretag)::2XTY1-SGFP-V5-preTEV-BLRP-3XFLAGdFRT	FBgn0037589	Obp85a	Odorant-binding protein 85a, CG11732, DmelObp85a	dmel-5.43-3R(-)::4245544-4246319	dmel-5.43-3R	4245544	4246319	-	dmel-5.43-3R::4235660-4267859	FlyFos029545	42892	4235660	4267859	FlyFos029545[9888-10950]	dmel-5.43-3R(-)[4235660-4267859]		grows	[NGS] validated	fully_covered;no mut;flipped	fully_covered	no mut	flipped	25	124	131	0	0	0							13996837788417626_B12	58519847_91_B_12_9888_10950_dmel-5.43-3R_4235660_4267859
13996837788417626_C05	https://transgeneome.mpi-cbg.de/transgeneomics/public/clone.html?wellId=59071755	FlyFos029455(CG13856[17310]::S000169_fly_pretag)::2XTY1-SGFP-V5-preTEV-BLRP-3XFLAGdFRT	FBgn0038959	CG13856		dmel-5.43-3R(+)::18228377-18230783	dmel-5.43-3R	18228377	18230783	+	dmel-5.43-3R::18197033-18238415	FlyFos029455	52075	18197033	18238415	FlyFos029455[7681-8743]	dmel-5.43-3R(+)[18230736-18230735]		grows	[NGS] validated	fully_covered;no mut;flipped	fully_covered	no mut	flipped	18	86	80	0	0	0							13996837788417626_C05	58519847_91_C_5_7681_8743_dmel-5.43-3R_18230736_18230735
13996837788417626_C06	https://transgeneome.mpi-cbg.de/transgeneomics/public/clone.html?wellId=59071819	FlyFos029468(CG7465[20895]::S000169_fly_pretag)::2XTY1-SGFP-V5-preTEV-BLRP-3XFLAGdFRT	FBgn0035551	CG7465		dmel-5.43-3L(+)::4480282-4481487	dmel-5.43-3L	4480282	4481487	+	dmel-5.43-3L::4454793-4492637	FlyFos029468	48537	4454793	4492637	FlyFos029468[11266-12328]	dmel-5.43-3L(+)[4481373-4481372]		grows	[NGS] validated	fully_covered;no mut;flipped	fully_covered	no mut	flipped	19	95	67	0	0	0							13996837788417626_C06	58519847_91_C_6_11266_12328_dmel-5.43-3L_4481373_4481372
13996837788417626_C09	https://transgeneome.mpi-cbg.de/transgeneomics/public/clone.html?wellId=59072011	FlyFos029497(CG7420[38053]::S000169_fly_pretag)::2XTY1-SGFP-V5-preTEV-BLRP-3XFLAGdFRT	FBgn0031344	CG7420		dmel-5.43-2L(-)::1500835-1502903	dmel-5.43-2L	1500835	1502903	-	dmel-5.43-2L::1495740-1529371	FlyFos029497	44324	1495740	1529371	FlyFos029497[28424-29486]	dmel-5.43-2L(-)[1500949-1500948]		grows	[NGS] validated	fully_covered;no mut;flipped	fully_covered	no mut	flipped	18	69	99	0	0	0							13996837788417626_C09	58519847_91_C_9_28424_29486_dmel-5.43-2L_1500949_1500948
13996837788417626_C12	https://transgeneome.mpi-cbg.de/transgeneomics/public/clone.html?wellId=59072203	FlyFos029552(CheB53b[21506]::S000169_fly_pretag)::2XTY1-SGFP-V5-preTEV-BLRP-3XFLAGdFRT	FBgn0261293	CheB53b	Chemosensory protein B 53b, CG33524, CheB53b, CG33524, CG33457	dmel-5.43-2R(+)::12355714-12356439	dmel-5.43-2R	12355714	12356439	+	dmel-5.43-2R::12335708-12368312	FlyFos029552	43297	12335708	12368312	FlyFos029552[11877-12939]	dmel-5.43-2R(+)[12356437-12356436]		grows	[NGS] validated	fully_covered;no mut;flipped	fully_covered	no mut	flipped	32	174	126	0	0	0							13996837788417626_C12	58519847_91_C_12_11877_12939_dmel-5.43-2R_12356437_12356436
13996837788417626_D03	https://transgeneome.mpi-cbg.de/transgeneomics/public/clone.html?wellId=59071635	FlyFos029426(CG14708[19240]::S000169_fly_pretag)::2XTY1-SGFP-V5-preTEV-BLRP-3XFLAGdFRT	FBgn0037910	CG14708		dmel-5.43-3R(+)::7379867-7380591	dmel-5.43-3R	7379867	7380591	+	dmel-5.43-3R::7357117-7390135	FlyFos029426	43711	7357117	7390135	FlyFos029426[9611-10673]	dmel-5.43-3R(+)[7380526-7380525]		grows	[NGS] validated	fully_covered;no mut;flipped	fully_covered	no mut	flipped	15	72	74	0	0	0							13996837788417626_D03	58519847_91_D_3_9611_10673_dmel-5.43-3R_7380526_7380525
13996837788417626_D06	https://transgeneome.mpi-cbg.de/transgeneomics/public/clone.html?wellId=59071827	FlyFos029469(rno[22514]::S000169_fly_pretag)::2XTY1-SGFP-V5-preTEV-BLRP-3XFLAGdFRT	FBgn0035106	rno	rhinoceros, Rhinoceros, CG7036	dmel-5.43-3L(-)::187815-199762	dmel-5.43-3L	187815	199762	-	dmel-5.43-3L::175668-212800	FlyFos029469	47825	175668	212800	FlyFos029469[12885-13947]	dmel-5.43-3L(-)[175668-212800]		grows	[NGS] validated	fully_covered;no mut;flipped	fully_covered	no mut	flipped	23	78	99	0	0	0							13996837788417626_D06	58519847_91_D_6_12885_13947_dmel-5.43-3L_175668_212800
13996837788417626_D07	https://transgeneome.mpi-cbg.de/transgeneomics/public/clone.html?wellId=59071891	FlyFos029480(CG13663[31381]::S000169_fly_pretag)::2XTY1-SGFP-V5-preTEV-BLRP-3XFLAGdFRT	FBgn0039291	CG13663		dmel-5.43-3R(-)::21040047-21040910	dmel-5.43-3R	21040047	21040910	-	dmel-5.43-3R::21023732-21062018	FlyFos029480	48979	21023732	21062018	FlyFos029480[21752-22814]	dmel-5.43-3R(-)[21040268-21040267]		grows	[NGS] validated	fully_covered;no mut;flipped	fully_covered	no mut	flipped	20	49	110	0	0	0							13996837788417626_D07	58519847_91_D_7_21752_22814_dmel-5.43-3R_21040268_21040267
13996837788417626_D08	https://transgeneome.mpi-cbg.de/transgeneomics/public/clone.html?wellId=59071955	FlyFos029496(CG13042[32103]::S000169_fly_pretag)::2XTY1-SGFP-V5-preTEV-BLRP-3XFLAGdFRT	FBgn0036602	CG13042		dmel-5.43-3L(-)::16300946-16301580	dmel-5.43-3L	16300946	16301580	-	dmel-5.43-3L::16289674-16323573	FlyFos029496	44592	16289674	16323573	FlyFos029496[22474-23536]	dmel-5.43-3L(-)[16301101-16301100]		grows	[NGS] validated	fully_covered;no mut;flipped	fully_covered	no mut	flipped	9	41	36	0	0	0							13996837788417626_D08	58519847_91_D_8_22474_23536_dmel-5.43-3L_16301101_16301100
13996837788417626_D10	https://transgeneome.mpi-cbg.de/transgeneomics/public/clone.html?wellId=59072083	FlyFos029515(CG10512[24922]::S000169_fly_pretag)::2XTY1-SGFP-V5-preTEV-BLRP-3XFLAGdFRT	FBgn0037057	CG10512		dmel-5.43-3L(+)::21196020-21201194	dmel-5.43-3L	21196020	21201194	+	dmel-5.43-3L::21185400-21219136	FlyFos029515	44429	21185400	21219136	FlyFos029515[15293-16355]	dmel-5.43-3L(+)[21185400-21219136]		grows	[NGS] validated	fully_covered;no mut;flipped	fully_covered	no mut	flipped	38	188	108	0	0	0							13996837788417626_D10	58519847_91_D_10_15293_16355_dmel-5.43-3L_21185400_21219136
13996837788417626_D11	https://transgeneome.mpi-cbg.de/transgeneomics/public/clone.html?wellId=59072147	FlyFos029533(CG5521[31005]::S000169_fly_pretag)::2XTY1-SGFP-V5-preTEV-BLRP-3XFLAGdFRT	FBgn0039466	CG5521	EP3527	dmel-5.43-3R(+)::22792652-22802267	dmel-5.43-3R	22792652	22802267	+	dmel-5.43-3R::22780890-22811410	FlyFos029533	41213	22780890	22811410	FlyFos029533[21376-22438]	dmel-5.43-3R(+)[22780890-22811410]		grows	[NGS] validated	fully_covered;no mut;flipped	fully_covered	no mut	flipped	25	233	191	0	0	0							13996837788417626_D11	58519847_91_D_11_21376_22438_dmel-5.43-3R_22780890_22811410
13996837788417626_D12	https://transgeneome.mpi-cbg.de/transgeneomics/public/clone.html?wellId=59072211	FlyFos029552(CheB53a[22918]::S000169_fly_pretag)::2XTY1-SGFP-V5-preTEV-BLRP-3XFLAGdFRT	FBgn0261292	CheB53a	Chemosensory protein B 53a, CheB53a, CG33550, CG16797, CG33457, CG33550	dmel-5.43-2R(+)::12354214-12355027	dmel-5.43-2R	12354214	12355027	+	dmel-5.43-2R::12335708-12368312	FlyFos029552	43297	12335708	12368312	FlyFos029552[13289-14351]	dmel-5.43-2R(+)[12355025-12355024]		grows	[NGS] validated	fully_covered;no mut;flipped	fully_covered	no mut	flipped	26	116	149	0	0	0							13996837788417626_D12	58519847_91_D_12_13289_14351_dmel-5.43-2R_12355025_12355024
13996837788417626_E01	https://transgeneome.mpi-cbg.de/transgeneomics/public/clone.html?wellId=59071515	FlyFos029392(CG1545[32314]::S000169_fly_pretag)::2XTY1-SGFP-V5-preTEV-BLRP-3XFLAGdFRT	FBgn0030259	CG1545	BcDNA:GH01560, anon-EST:Posey256	dmel-5.43-X(-)::10951578-10953652	dmel-5.43-X	10951578	10953652	-	dmel-5.43-X::10937960-10974396	FlyFos029392	47129	10937960	10974396	FlyFos029392[22685-23747]	dmel-5.43-X(-)[10951713-10951712]		grows	[NGS] validated	fully_covered;no mut;flipped	fully_covered	no mut	flipped	24	78	149	0	0	0							13996837788417626_E01	58519847_91_E_1_22685_23747_dmel-5.43-X_10951713_10951712
13996837788417626_E03	https://transgeneome.mpi-cbg.de/transgeneomics/public/clone.html?wellId=59071643	FlyFos029432(CG34260[21730]::S000169_fly_pretag)::2XTY1-SGFP-V5-preTEV-BLRP-3XFLAGdFRT	FBgn0085289	CG34260		dmel-5.43-3L(+)::20702505-20708258	dmel-5.43-3L	20702505	20708258	+	dmel-5.43-3L::20681363-20720349	FlyFos029432	49679	20681363	20720349	FlyFos029432[12101-13163]	dmel-5.43-3L(+)[20708250-20708249]		grows	[NGS] validated	fully_covered;no mut;flipped	fully_covered	no mut	flipped	21	180	65	0	0	0							13996837788417626_E03	58519847_91_E_3_12101_13163_dmel-5.43-3L_20708250_20708249
13996837788417626_E07	https://transgeneome.mpi-cbg.de/transgeneomics/public/clone.html?wellId=59071899	FlyFos029487(MED19[23714]::S000169_fly_pretag)::2XTY1-SGFP-V5-preTEV-BLRP-3XFLAGdFRT	FBgn0036761	MED19	Mediator complex subunit 19, CG5546	dmel-5.43-3L(-)::17836906-17839600	dmel-5.43-3L	17836906	17839600	-	dmel-5.43-3L::17823273-17864774	FlyFos029487	52194	17823273	17864774	FlyFos029487[14085-15147]	dmel-5.43-3L(-)[17823273-17864774]		grows	[NGS] validated	fully_covered;no mut;flipped	fully_covered	no mut	flipped	33	166	197	0	0	0							13996837788417626_E07	58519847_91_E_7_14085_15147_dmel-5.43-3L_17823273_17864774
13996837788417626_E08	https://transgeneome.mpi-cbg.de/transgeneomics/public/clone.html?wellId=59071963	FlyFos029496(CG13063[33008]::S000169_fly_pretag)::2XTY1-SGFP-V5-preTEV-BLRP-3XFLAGdFRT	FBgn0036601	CG13063		dmel-5.43-3L(+)::16299700-16300305	dmel-5.43-3L	16299700	16300305	+	dmel-5.43-3L::16289674-16323573	FlyFos029496	44592	16289674	16323573	FlyFos029496[23379-24441]	dmel-5.43-3L(+)[16300196-16300195]		grows	[NGS] validated	fully_covered;no mut;flipped	fully_covered	no mut	flipped	27	182	116	0	0	0							13996837788417626_E08	58519847_91_E_8_23379_24441_dmel-5.43-3L_16300196_16300195
13996837788417626_E10	https://transgeneome.mpi-cbg.de/transgeneomics/public/clone.html?wellId=59072091	FlyFos029515(CG10508[33111]::S000169_fly_pretag)::2XTY1-SGFP-V5-preTEV-BLRP-3XFLAGdFRT	FBgn0037060	CG10508		dmel-5.43-3L(+)::21203329-21209151	dmel-5.43-3L	21203329	21209151	+	dmel-5.43-3L::21185400-21219136	FlyFos029515	44429	21185400	21219136	FlyFos029515[23482-24544]	dmel-5.43-3L(+)[21185400-21219136]		grows	[NGS] validated	fully_covered;no mut;flipped	fully_covered	no mut	flipped	31	165	133	0	0	0							13996837788417626_E10	58519847_91_E_10_23482_24544_dmel-5.43-3L_21185400_21219136
13996837788417626_E11	https://transgeneome.mpi-cbg.de/transgeneomics/public/clone.html?wellId=59072155	FlyFos029534(CG6428[38669]::S000169_fly_pretag)::2XTY1-SGFP-V5-preTEV-BLRP-3XFLAGdFRT	FBgn0029689	CG6428	CG-6428	dmel-5.43-X(-)::3859459-3862597	dmel-5.43-X	3859459	3862597	-	dmel-5.43-X::3848309-3888894	FlyFos029534	51278	3848309	3888894	FlyFos029534[29040-30102]	dmel-5.43-X(-)[3859856-3859855]		grows	[NGS] validated	fully_covered;no mut;flipped	fully_covered	no mut	flipped	32	150	220	0	0	0							13996837788417626_E11	58519847_91_E_11_29040_30102_dmel-5.43-X_3859856_3859855
13996837788417626_E12	https://transgeneome.mpi-cbg.de/transgeneomics/public/clone.html?wellId=59072219	FlyFos029556(CG18666[16988]::S000169_fly_pretag)::2XTY1-SGFP-V5-preTEV-BLRP-3XFLAGdFRT	FBgn0040967	CG18666		dmel-5.43-2L(+)::11034849-11035308	dmel-5.43-2L	11034849	11035308	+	dmel-5.43-2L::11027875-11065097	FlyFos029556	47915	11027875	11065097	FlyFos029556[7359-8421]	dmel-5.43-2L(+)[11027875-11065097]		grows	[NGS] validated	fully_covered;no mut;flipped	fully_covered	no mut	flipped	18	107	90	0	0	0							13996837788417626_E12	58519847_91_E_12_7359_8421_dmel-5.43-2L_11027875_11065097
13996837788417626_F01	https://transgeneome.mpi-cbg.de/transgeneomics/public/clone.html?wellId=59071523	FlyFos029393(CG12272[19493]::S000169_fly_pretag)::2XTY1-SGFP-V5-preTEV-BLRP-3XFLAGdFRT	FBgn0036571	CG12272	p118	dmel-5.43-3L(+)::16115122-16119152	dmel-5.43-3L	16115122	16119152	+	dmel-5.43-3L::16096390-16128959	FlyFos029393	43262	16096390	16128959	FlyFos029393[9864-10926]	dmel-5.43-3L(+)[16119097-16119096]		grows	[NGS] validated	fully_covered;no mut;flipped	fully_covered	no mut	flipped	27	160	126	0	0	0							13996837788417626_F01	58519847_91_F_1_9864_10926_dmel-5.43-3L_16119097_16119096
13996837788417626_F09	https://transgeneome.mpi-cbg.de/transgeneomics/public/clone.html?wellId=59072035	FlyFos029506(CG7031[35343]::S000169_fly_pretag)::2XTY1-SGFP-V5-preTEV-BLRP-3XFLAGdFRT	FBgn0039027	CG7031		dmel-5.43-3R(+)::18630013-18632211	dmel-5.43-3R	18630013	18632211	+	dmel-5.43-3R::18606193-18646258	FlyFos029506	50758	18606193	18646258	FlyFos029506[25714-26776]	dmel-5.43-3R(+)[18606193-18646258]		grows	[NGS] validated	fully_covered;no mut;flipped	fully_covered	no mut	flipped	18	70	105	0	0	0							13996837788417626_F09	58519847_91_F_9_25714_26776_dmel-5.43-3R_18606193_18646258
13996837788417626_F10	https://transgeneome.mpi-cbg.de/transgeneomics/public/clone.html?wellId=59072099	FlyFos029515(CG33054[14793]::S000169_fly_pretag)::2XTY1-SGFP-V5-preTEV-BLRP-3XFLAGdFRT	FBgn0053054	CG33054	CG10167, CG10517	dmel-5.43-3L(-)::21190511-21195978	dmel-5.43-3L	21190511	21195978	-	dmel-5.43-3L::21185400-21219136	FlyFos029515	44429	21185400	21219136	FlyFos029515[5164-6226]	dmel-5.43-3L(-)[21185400-21219136]		grows	[NGS] validated	fully_covered;no mut;flipped	fully_covered	no mut	flipped	24	115	125	0	0	0							13996837788417626_F10	58519847_91_F_10_5164_6226_dmel-5.43-3L_21185400_21219136
13996837788417626_F12	https://transgeneome.mpi-cbg.de/transgeneomics/public/clone.html?wellId=59072227	FlyFos029558(CG7441[31599]::S000169_fly_pretag)::2XTY1-SGFP-V5-preTEV-BLRP-3XFLAGdFRT	FBgn0036763	CG7441	GH31, BEST:CK01295	dmel-5.43-3L(+)::17842795-17845554	dmel-5.43-3L	17842795	17845554	+	dmel-5.43-3L::17823256-17864770	FlyFos029558	52207	17823256	17864770	FlyFos029558[21970-23032]	dmel-5.43-3L(+)[17823256-17864770]		grows	[NGS] validated	fully_covered;no mut;flipped	fully_covered	no mut	flipped	32	154	102	0	0	0							13996837788417626_F12	58519847_91_F_12_21970_23032_dmel-5.43-3L_17823256_17864770
13996837788417626_G05	https://transgeneome.mpi-cbg.de/transgeneomics/public/clone.html?wellId=59071787	FlyFos029462(CCHa2[44292]::S000169_fly_pretag)::2XTY1-SGFP-V5-preTEV-BLRP-3XFLAGdFRT	FBgn0038147	CCHa2	CCHamide-2, Drm-CCHamide-2, Dm-CCHa2, BcDNA:RE10132, CG14375	dmel-5.43-3R(-)::9214781-9220912	dmel-5.43-3R	9214781	9220912	-	dmel-5.43-3R::9210668-9250059	FlyFos029462	50084	9210668	9250059	FlyFos029462[34663-35725]	dmel-5.43-3R(-)[9215398-9215397]		grows	[NGS] validated	fully_covered;no mut;flipped	fully_covered	no mut	flipped	25	97	119	0	0	0							13996837788417626_G05	58519847_91_G_5_34663_35725_dmel-5.43-3R_9215398_9215397
13996837788417626_G06	https://transgeneome.mpi-cbg.de/transgeneomics/public/clone.html?wellId=59071851	FlyFos029470(CG4839[16947]::S000169_fly_pretag)::2XTY1-SGFP-V5-preTEV-BLRP-3XFLAGdFRT	FBgn0032187	CG4839	PKG-like	dmel-5.43-2L(+)::10144850-10155510	dmel-5.43-2L	10144850	10155510	+	dmel-5.43-2L::10128282-10162530	FlyFos029470	44941	10128282	10162530	FlyFos029470[7318-8380]	dmel-5.43-2L(+)[10155214-10155213]		grows	[NGS] validated	fully_covered;no mut;flipped	fully_covered	no mut	flipped	28	190	95	0	0	0							13996837788417626_G06	58519847_91_G_6_7318_8380_dmel-5.43-2L_10155214_10155213
13996837788417626_G07	https://transgeneome.mpi-cbg.de/transgeneomics/public/clone.html?wellId=59071915	FlyFos029492(blot[38652]::S000169_fly_pretag)::2XTY1-SGFP-V5-preTEV-BLRP-3XFLAGdFRT	FBgn0027660	blot	bloated tubules, Blated tubules, DmBLOT, l(3)1658, CG3897	dmel-5.43-3L(-)::17389124-17414612	dmel-5.43-3L	17389124	17414612	-	dmel-5.43-3L::17380648-17418678	FlyFos029492	48723	17380648	17418678	FlyFos029492[29023-30085]	dmel-5.43-3L(-)[17389657-17389656]		grows	[NGS] validated	fully_covered;no mut;flipped	fully_covered	no mut	flipped	31	156	148	0	0	0							13996837788417626_G07	58519847_91_G_7_29023_30085_dmel-5.43-3L_17389657_17389656
13996837788417626_G08	https://transgeneome.mpi-cbg.de/transgeneomics/public/clone.html?wellId=59071979	FlyFos029496(CG13060[19725]::S000169_fly_pretag)::2XTY1-SGFP-V5-preTEV-BLRP-3XFLAGdFRT	FBgn0036606	CG13060	BcDNA:RE40431	dmel-5.43-3L(+)::16312960-16313554	dmel-5.43-3L	16312960	16313554	+	dmel-5.43-3L::16289674-16323573	FlyFos029496	44592	16289674	16323573	FlyFos029496[10096-11158]	dmel-5.43-3L(+)[16313479-16313478]		grows	[NGS] validated	fully_covered;no mut;flipped	fully_covered	no mut	flipped	29	107	153	0	0	0							13996837788417626_G08	58519847_91_G_8_10096_11158_dmel-5.43-3L_16313479_16313478
13996837788417626_G09	https://transgeneome.mpi-cbg.de/transgeneomics/public/clone.html?wellId=59072043	FlyFos029507(CG5524[35512]::S000169_fly_pretag)::2XTY1-SGFP-V5-preTEV-BLRP-3XFLAGdFRT	FBgn0039164	CG5524		dmel-5.43-3R(-)::20014770-20019145	dmel-5.43-3R	20014770	20019145	-	dmel-5.43-3R::20004677-20040754	FlyFos029507	46770	20004677	20040754	FlyFos029507[25883-26945]	dmel-5.43-3R(-)[20014873-20014872]		grows	[NGS] validated	fully_covered;no mut;flipped	fully_covered	no mut	flipped	26	107	142	0	0	0							13996837788417626_G09	58519847_91_G_9_25883_26945_dmel-5.43-3R_20014873_20014872
13996837788417626_G11	https://transgeneome.mpi-cbg.de/transgeneomics/public/clone.html?wellId=59072171	FlyFos029540(CG15537[43705]::S000169_fly_pretag)::2XTY1-SGFP-V5-preTEV-BLRP-3XFLAGdFRT	FBgn0039770	CG15537		dmel-5.43-3R(-)::26261033-26269321	dmel-5.43-3R	26261033	26269321	-	dmel-5.43-3R::26254589-26295156	FlyFos029540	51260	26254589	26295156	FlyFos029540[34076-35138]	dmel-5.43-3R(-)[26261082-26261081]		grows	[NGS] validated	fully_covered;no mut;flipped	fully_covered	no mut	flipped	19	73	103	0	0	0							13996837788417626_G11	58519847_91_G_11_34076_35138_dmel-5.43-3R_26261082_26261081
13996837788417626_G12	https://transgeneome.mpi-cbg.de/transgeneomics/public/clone.html?wellId=59072235	FlyFos029558(CG5567[21184]::S000169_fly_pretag)::2XTY1-SGFP-V5-preTEV-BLRP-3XFLAGdFRT	FBgn0036760	CG5567	Phos5567	dmel-5.43-3L(-)::17834635-17836642	dmel-5.43-3L	17834635	17836642	-	dmel-5.43-3L::17823256-17864770	FlyFos029558	52207	17823256	17864770	FlyFos029558[11555-12617]	dmel-5.43-3L(-)[17823256-17864770]		grows	[NGS] validated	fully_covered;no mut;flipped	fully_covered	no mut	flipped	17	84	71	0	0	0							13996837788417626_G12	58519847_91_G_12_11555_12617_dmel-5.43-3L_17823256_17864770
13996837788417626_H03	https://transgeneome.mpi-cbg.de/transgeneomics/public/clone.html?wellId=59071667	FlyFos029445(CG42781[19889]::S000169_fly_pretag)::2XTY1-SGFP-V5-preTEV-BLRP-3XFLAGdFRT	FBgn0261849	CG42781	MIP22495	dmel-5.43-X(-)::7276821-7276940	dmel-5.43-X	7276821	7276940	-	dmel-5.43-X::7266565-7301770	FlyFos029445	45898	7266565	7301770	FlyFos029445[10260-11322]	dmel-5.43-X(-)[7266565-7301770]		grows	[NGS] validated	fully_covered;no mut;flipped	fully_covered	no mut	flipped	25	152	138	0	0	0							13996837788417626_H03	58519847_91_H_3_10260_11322_dmel-5.43-X_7266565_7301770
13996837788417626_H05	https://transgeneome.mpi-cbg.de/transgeneomics/public/clone.html?wellId=59071795	FlyFos029462(CG33977[31329]::S000169_fly_pretag)::2XTY1-SGFP-V5-preTEV-BLRP-3XFLAGdFRT	FBgn0053977	CG33977		dmel-5.43-3R(-)::9228281-9228771	dmel-5.43-3R	9228281	9228771	-	dmel-5.43-3R::9210668-9250059	FlyFos029462	50084	9210668	9250059	FlyFos029462[21700-22762]	dmel-5.43-3R(-)[9228361-9228360]		grows	[NGS] validated	fully_covered;no mut;flipped	fully_covered	no mut	flipped	4	22	19	0	0	0							13996837788417626_H05	58519847_91_H_5_21700_22762_dmel-5.43-3R_9228361_9228360
13996837788417626_H06	https://transgeneome.mpi-cbg.de/transgeneomics/public/clone.html?wellId=59071859	FlyFos029471(CG7639[36064]::S000169_fly_pretag)::2XTY1-SGFP-V5-preTEV-BLRP-3XFLAGdFRT	FBgn0033989	CG7639		dmel-5.43-2R(-)::10875170-10879728	dmel-5.43-2R	10875170	10879728	-	dmel-5.43-2R::10867958-10901873	FlyFos029471	44608	10867958	10901873	FlyFos029471[26435-27497]	dmel-5.43-2R(-)[10875440-10875439]		grows	[NGS] validated	fully_covered;no mut;flipped	fully_covered	no mut	flipped	25	109	156	0	0	0							13996837788417626_H06	58519847_91_H_6_26435_27497_dmel-5.43-2R_10875440_10875439
13996837788417626_H07	https://transgeneome.mpi-cbg.de/transgeneomics/public/clone.html?wellId=59071923	FlyFos029493(l(1)G0136[22393]::S000169_fly_pretag)::2XTY1-SGFP-V5-preTEV-BLRP-3XFLAGdFRT	FBgn0026666	l(1)G0136	lethal (1) G0136, BcDNA:AT26381, CG8198	dmel-5.43-X(+)::15628313-15629814	dmel-5.43-X	15628313	15629814	+	dmel-5.43-X::15603926-15642285	FlyFos029493	49052	15603926	15642285	FlyFos029493[12764-13826]	dmel-5.43-X(+)[15629523-15629522]		grows	[NGS] validated	fully_covered;no mut;flipped	fully_covered	no mut	flipped	22	103	114	0	0	0							13996837788417626_H07	58519847_91_H_7_12764_13826_dmel-5.43-X_15629523_15629522
13996837788417626_H08	https://transgeneome.mpi-cbg.de/transgeneomics/public/clone.html?wellId=59071987	FlyFos029496(CG4982[38218]::S000169_fly_pretag)::2XTY1-SGFP-V5-preTEV-BLRP-3XFLAGdFRT	FBgn0036598	CG4982		dmel-5.43-3L(+)::16294570-16295127	dmel-5.43-3L	16294570	16295127	+	dmel-5.43-3L::16289674-16323573	FlyFos029496	44592	16289674	16323573	FlyFos029496[28589-29651]	dmel-5.43-3L(+)[16294986-16294985]		grows	[NGS] validated	fully_covered;no mut;flipped	fully_covered	no mut	flipped	25	140	132	0	0	0							13996837788417626_H08	58519847_91_H_8_28589_29651_dmel-5.43-3L_16294986_16294985
13996837788417626_H09	https://transgeneome.mpi-cbg.de/transgeneomics/public/clone.html?wellId=59072051	FlyFos029507(CG5515[36857]::S000169_fly_pretag)::2XTY1-SGFP-V5-preTEV-BLRP-3XFLAGdFRT	FBgn0039163	CG5515		dmel-5.43-3R(-)::20013444-20014663	dmel-5.43-3R	20013444	20014663	-	dmel-5.43-3R::20004677-20040754	FlyFos029507	46770	20004677	20040754	FlyFos029507[27228-28290]	dmel-5.43-3R(-)[20013528-20013527]		grows	[NGS] validated	fully_covered;no mut;flipped	fully_covered	no mut	flipped	15	51	90	0	0	0							13996837788417626_H09	58519847_91_H_9_27228_28290_dmel-5.43-3R_20013528_20013527
13996837788417626_H12	https://transgeneome.mpi-cbg.de/transgeneomics/public/clone.html?wellId=59072243	FlyFos029558(CG5577[19297]::S000169_fly_pretag)::2XTY1-SGFP-V5-preTEV-BLRP-3XFLAGdFRT	FBgn0036759	CG5577		dmel-5.43-3L(-)::17832882-17834504	dmel-5.43-3L	17832882	17834504	-	dmel-5.43-3L::17823256-17864770	FlyFos029558	52207	17823256	17864770	FlyFos029558[9668-10730]	dmel-5.43-3L(-)[17823256-17864770]		grows	[NGS] validated	fully_covered;no mut;flipped	fully_covered	no mut	flipped	29	97	140	0	0	0							13996837788417626_H12	58519847_91_H_12_9668_10730_dmel-5.43-3L_17823256_17864770
14365767356821757_A02	https://transgeneome.mpi-cbg.de/transgeneomics/public/clone.html?wellId=59054805	FlyFos025777(CG18673[33085]::S000169_fly_pretag)::2XTY1-SGFP-V5-preTEV-BLRP-3XFLAGdFRT	FBgn0040629	CG18673		dmel-5.43-3R(+)::27088350-27089716	dmel-5.43-3R	27088350	27089716	+	dmel-5.43-3R::27066082-27098643	FlyFos025777	43254	27066082	27098643	FlyFos025777[23456-24518]	dmel-5.43-3R(+)[27066082-27098643]		grows	[NGS] validated	fully_covered;no mut;flipped	fully_covered	no mut	flipped	57	308	319	0	0	0							14365767356821757_A02	58519847_69_A_2_23456_24518_dmel-5.43-3R_27066082_27098643
14365767356821757_A04	https://transgeneome.mpi-cbg.de/transgeneomics/public/clone.html?wellId=59054933	FlyFos025815(CG43209[27605]::S000169_fly_pretag)::2XTY1-SGFP-V5-preTEV-BLRP-3XFLAGdFRT	FBgn0262845	CG43209	DMG4-MB6.chr2R.33.028	dmel-5.43-2R(-)::19489504-19489979	dmel-5.43-2R	19489504	19489979	-	dmel-5.43-2R::19471560-19506008	FlyFos025815	45141	19471560	19506008	FlyFos025815[17976-19038]	dmel-5.43-2R(-)[19471560-19506008]		grows	[NGS] validated	fully_covered;no mut;flipped	fully_covered	no mut	flipped	34	201	178	0	0	0							14365767356821757_A04	58519847_69_A_4_17976_19038_dmel-5.43-2R_19471560_19506008
14365767356821757_A06	https://transgeneome.mpi-cbg.de/transgeneomics/public/clone.html?wellId=59055061	FlyFos025853(CG15084[43235]::S000169_fly_pretag)::2XTY1-SGFP-V5-preTEV-BLRP-3XFLAGdFRT	FBgn0034402	CG15084		dmel-5.43-2R(+)::14738366-14739468	dmel-5.43-2R	14738366	14739468	+	dmel-5.43-2R::14729915-14772993	FlyFos025853	53771	14729915	14772993	FlyFos025853[33606-34668]	dmel-5.43-2R(+)[14739389-14739388]		grows	[NGS] validated	fully_covered;no mut;flipped	fully_covered	no mut	flipped	44	310	249	0	0	0							14365767356821757_A06	58519847_69_A_6_33606_34668_dmel-5.43-2R_14739389_14739388
14365767356821757_A07	https://transgeneome.mpi-cbg.de/transgeneomics/public/clone.html?wellId=59055125	FlyFos025861(CG10189[29896]::S000169_fly_pretag)::2XTY1-SGFP-V5-preTEV-BLRP-3XFLAGdFRT	FBgn0032793	CG10189	i180, i199	dmel-5.43-2L(-)::19491647-19492927	dmel-5.43-2L	19491647	19492927	-	dmel-5.43-2L::19478203-19511944	FlyFos025861	44434	19478203	19511944	FlyFos025861[20267-21329]	dmel-5.43-2L(-)[19491679-19491678]		grows	[NGS] validated	fully_covered;no mut;flipped	fully_covered	no mut	flipped	49	295	273	0	0	0							14365767356821757_A07	58519847_69_A_7_20267_21329_dmel-5.43-2L_19491679_19491678
14365767356821757_A08	https://transgeneome.mpi-cbg.de/transgeneomics/public/clone.html?wellId=59055189	FlyFos025885(CG34160[26625]::S000169_fly_pretag)::2XTY1-SGFP-V5-preTEV-BLRP-3XFLAGdFRT	FBgn0250826	CG34160	NEST:bs34b09, NEST:bs34b09	dmel-5.43-2L(+)::10579809-10580324	dmel-5.43-2L	10579809	10580324	+	dmel-5.43-2L::10559390-10597187	FlyFos025885	48490	10559390	10597187	FlyFos025885[16996-18058]	dmel-5.43-2L(+)[10580193-10580192]		grows	[NGS] validated	fully_covered;no mut;flipped	fully_covered	no mut	flipped	10	61	33	0	0	0							14365767356821757_A08	58519847_69_A_8_16996_18058_dmel-5.43-2L_10580193_10580192
14365767356821757_A09	https://transgeneome.mpi-cbg.de/transgeneomics/public/clone.html?wellId=59055253	FlyFos025890(CG9286[19447]::S000169_fly_pretag)::2XTY1-SGFP-V5-preTEV-BLRP-3XFLAGdFRT	FBgn0038183	CG9286		dmel-5.43-3R(+)::9606714-9607808	dmel-5.43-3R	9606714	9607808	+	dmel-5.43-3R::9577202-9617603	FlyFos025890	51094	9577202	9617603	FlyFos025890[9818-10880]	dmel-5.43-3R(+)[9607787-9607786]		grows	[NGS] validated	fully_covered;no mut;flipped	fully_covered	no mut	flipped	13	54	46	0	0	0							14365767356821757_A09	58519847_69_A_9_9818_10880_dmel-5.43-3R_9607787_9607786
14365767356821757_A10	https://transgeneome.mpi-cbg.de/transgeneomics/public/clone.html?wellId=59055317	FlyFos025891(CG13365[21560]::S000169_fly_pretag)::2XTY1-SGFP-V5-preTEV-BLRP-3XFLAGdFRT	FBgn0029529	CG13365	BcDNA:LP07417	dmel-5.43-X(-)::514748-515241	dmel-5.43-X	514748	515241	-	dmel-5.43-X::502907-540969	FlyFos025891	48755	502907	540969	FlyFos025891[11931-12993]	dmel-5.43-X(-)[502907-540969]		grows	[NGS] validated	fully_covered;no mut;flipped	fully_covered	no mut	flipped	47	261	263	0	0	0							14365767356821757_A10	58519847_69_A_10_11931_12993_dmel-5.43-X_502907_540969
14365767356821757_A11	https://transgeneome.mpi-cbg.de/transgeneomics/public/clone.html?wellId=59055381	FlyFos025905(CG7907[17614]::S000169_fly_pretag)::2XTY1-SGFP-V5-preTEV-BLRP-3XFLAGdFRT	FBgn0038887	CG7907		dmel-5.43-3R(+)::17229457-17232412	dmel-5.43-3R	17229457	17232412	+	dmel-5.43-3R::17224253-17264028	FlyFos025905	50468	17224253	17264028	FlyFos025905[7985-9047]	dmel-5.43-3R(+)[17224253-17264028]		grows	[NGS] validated	fully_covered;no mut;flipped	fully_covered	no mut	flipped	30	198	160	0	0	0							14365767356821757_A11	58519847_69_A_11_7985_9047_dmel-5.43-3R_17224253_17264028
14365767356821757_A12	https://transgeneome.mpi-cbg.de/transgeneomics/public/clone.html?wellId=59055445	FlyFos025910(Osi11[20983]::S000169_fly_pretag)::2XTY1-SGFP-V5-preTEV-BLRP-3XFLAGdFRT	FBgn0037418	Osi11	Osiris 11, Osiris, osi11, CG15596	dmel-5.43-3R(-)::2093502-2094410	dmel-5.43-3R	2093502	2094410	-	dmel-5.43-3R::2065501-2104857	FlyFos025910	50049	2065501	2104857	FlyFos025910[11354-12416]	dmel-5.43-3R(-)[2093505-2093504]		grows	[NGS] validated	fully_covered;no mut;flipped	fully_covered	no mut	flipped	11	53	54	0	0	0							14365767356821757_A12	58519847_69_A_12_11354_12416_dmel-5.43-3R_2093505_2093504
14365767356821757_B03	https://transgeneome.mpi-cbg.de/transgeneomics/public/clone.html?wellId=59054877	FlyFos025812(CG6650[38077]::S000169_fly_pretag)::2XTY1-SGFP-V5-preTEV-BLRP-3XFLAGdFRT	FBgn0036402	CG6650	l(3)067006, l(3)S067006, 0670/06, anon-WO0172774.122, anon-WO0172774.123, anon-WO0172774.121	dmel-5.43-3L(+)::14024529-14027740	dmel-5.43-3L	14024529	14027740	+	dmel-5.43-3L::13998647-14043293	FlyFos025812	55339	13998647	14043293	FlyFos025812[28448-29510]	dmel-5.43-3L(+)[13998647-14043293]		grows	[NGS] validated	fully_covered;no mut;flipped	fully_covered	no mut	flipped	10	58	31	0	0	0							14365767356821757_B03	58519847_69_B_3_28448_29510_dmel-5.43-3L_13998647_14043293
14365767356821757_B04	https://transgeneome.mpi-cbg.de/transgeneomics/public/clone.html?wellId=59054941	FlyFos025815(CG42560[25144]::S000169_fly_pretag)::2XTY1-SGFP-V5-preTEV-BLRP-3XFLAGdFRT	FBgn0260762	CG42560	CG30182	dmel-5.43-2R(-)::19487046-19488310	dmel-5.43-2R	19487046	19488310	-	dmel-5.43-2R::19471560-19506008	FlyFos025815	45141	19471560	19506008	FlyFos025815[15515-16577]	dmel-5.43-2R(-)[19471560-19506008]		grows	[NGS] validated	fully_covered;no mut;flipped	fully_covered	no mut	flipped	21	69	153	0	0	0							14365767356821757_B04	58519847_69_B_4_15515_16577_dmel-5.43-2R_19471560_19506008
14365767356821757_B05	https://transgeneome.mpi-cbg.de/transgeneomics/public/clone.html?wellId=59055005	FlyFos025832(CG4476[19881]::S000169_fly_pretag)::2XTY1-SGFP-V5-preTEV-BLRP-3XFLAGdFRT	FBgn0035969	CG4476	DmNAT3, anon-WO0149848.7	dmel-5.43-3L(+)::9204984-9208369	dmel-5.43-3L	9204984	9208369	+	dmel-5.43-3L::9178649-9218440	FlyFos025832	50484	9178649	9218440	FlyFos025832[10252-11314]	dmel-5.43-3L(+)[9208190-9208189]		grows	[NGS] validated	fully_covered;no mut;flipped	fully_covered	no mut	flipped	8	44	34	0	0	0							14365767356821757_B05	58519847_69_B_5_10252_11314_dmel-5.43-3L_9208190_9208189
14365767356821757_B06	https://transgeneome.mpi-cbg.de/transgeneomics/public/clone.html?wellId=59055069	FlyFos025853(Jheh1[41655]::S000169_fly_pretag)::2XTY1-SGFP-V5-preTEV-BLRP-3XFLAGdFRT	FBgn0010053	Jheh1	Juvenile hormone epoxide hydrolase 1, microsomal apoxide hydrolase, Juvenile hormone epoxide hydrolase, JH-epoxide hydrolase, Jheh, 142196_at, BEST:GH06241, JH, CG15101, JHEH	dmel-5.43-2R(-)::14740939-14742614	dmel-5.43-2R	14740939	14742614	-	dmel-5.43-2R::14729915-14772993	FlyFos025853	53771	14729915	14772993	FlyFos025853[32026-33088]	dmel-5.43-2R(-)[14740969-14740968]		grows	[NGS] validated	fully_covered;no mut;flipped	fully_covered	no mut	flipped	9	37	32	0	0	0							14365767356821757_B06	58519847_69_B_6_32026_33088_dmel-5.43-2R_14740969_14740968
14365767356821757_B07	https://transgeneome.mpi-cbg.de/transgeneomics/public/clone.html?wellId=59055133	FlyFos025862(TfIIEalpha[24220]::S000169_fly_pretag)::2XTY1-SGFP-V5-preTEV-BLRP-3XFLAGdFRT	FBgn0015828	TfIIEalpha	Transcription factor IIEalpha, TFIIEalpha, TFIIE-L, dTFIIEL, TfIIEa, CG10415, TfIIE, dTFIIE-L, TfIIEalpha, TFIIE	dmel-5.43-3L(+)::11675126-11676905	dmel-5.43-3L	11675126	11676905	+	dmel-5.43-3L::11662177-11699790	FlyFos025862	48306	11662177	11699790	FlyFos025862[14591-15653]	dmel-5.43-3L(+)[11662177-11699790]		grows	[NGS] validated	fully_covered;no mut;flipped	fully_covered	no mut	flipped	31	139	123	0	0	0							14365767356821757_B07	58519847_69_B_7_14591_15653_dmel-5.43-3L_11662177_11699790
14365767356821757_B09	https://transgeneome.mpi-cbg.de/transgeneomics/public/clone.html?wellId=59055261	FlyFos025890(CG42375[21510]::S000169_fly_pretag)::2XTY1-SGFP-V5-preTEV-BLRP-3XFLAGdFRT	FBgn0259721	CG42375	CG9288, Dromel_CG9288_FBtr0082829_pyruvatekinasedomain_uORF	dmel-5.43-3R(+)::9605303-9606517	dmel-5.43-3R	9605303	9606517	+	dmel-5.43-3R::9577202-9617603	FlyFos025890	51094	9577202	9617603	FlyFos025890[11881-12943]	dmel-5.43-3R(+)[9605724-9605723]		grows	[NGS] validated	fully_covered;no mut;flipped	fully_covered	no mut	flipped	37	245	151	0	0	0							14365767356821757_B09	58519847_69_B_9_11881_12943_dmel-5.43-3R_9605724_9605723
14365767356821757_B10	https://transgeneome.mpi-cbg.de/transgeneomics/public/clone.html?wellId=59055325	FlyFos025897(CG5569[21244]::S000169_fly_pretag)::2XTY1-SGFP-V5-preTEV-BLRP-3XFLAGdFRT	FBgn0034919	CG5569	BcDNA:SD18780	dmel-5.43-2R(+)::19752944-19754177	dmel-5.43-2R	19752944	19754177	+	dmel-5.43-2R::19732202-19765714	FlyFos025897	44205	19732202	19765714	FlyFos025897[11615-12677]	dmel-5.43-2R(+)[19754101-19754100]		grows	[NGS] validated	fully_covered;no mut;flipped	fully_covered	no mut	flipped	41	207	166	0	0	0							14365767356821757_B10	58519847_69_B_10_11615_12677_dmel-5.43-2R_19754101_19754100
14365767356821757_B11	https://transgeneome.mpi-cbg.de/transgeneomics/public/clone.html?wellId=59055389	FlyFos025906(pallidin[30567]::S000169_fly_pretag)::2XTY1-SGFP-V5-preTEV-BLRP-3XFLAGdFRT	FBgn0036192	pallidin	pallidin, CG14133	dmel-5.43-3L(-)::11682731-11684499	dmel-5.43-3L	11682731	11684499	-	dmel-5.43-3L::11662179-11699792	FlyFos025906	48306	11662179	11699792	FlyFos025906[20938-22000]	dmel-5.43-3L(-)[11662179-11699792]		grows	[NGS] validated	fully_covered;no mut;flipped	fully_covered	no mut	flipped	39	179	196	0	0	0							14365767356821757_B11	58519847_69_B_11_20938_22000_dmel-5.43-3L_11662179_11699792
14365767356821757_B12	https://transgeneome.mpi-cbg.de/transgeneomics/public/clone.html?wellId=59055453	FlyFos025910(Osi8[32376]::S000169_fly_pretag)::2XTY1-SGFP-V5-preTEV-BLRP-3XFLAGdFRT	FBgn0037415	Osi8	Osiris 8, Osiris, CG15591	dmel-5.43-3R(+)::2080997-2082114	dmel-5.43-3R	2080997	2082114	+	dmel-5.43-3R::2065501-2104857	FlyFos025910	50049	2065501	2104857	FlyFos025910[22747-23809]	dmel-5.43-3R(+)[2082112-2082111]		grows	[NGS] validated	fully_covered;no mut;flipped	fully_covered	no mut	flipped	27	119	128	0	0	0		->18382|G|A(0|54:54)	1	mut oustde of 100	mut_in_tag+1000		14365767356821757_B12	58519847_69_B_12_22747_23809_dmel-5.43-3R_2082112_2082111
14365767356821757_C01	https://transgeneome.mpi-cbg.de/transgeneomics/public/clone.html?wellId=59054757	FlyFos025760(CG3630[15777]::S000169_fly_pretag)::2XTY1-SGFP-V5-preTEV-BLRP-3XFLAGdFRT	FBgn0023540	CG3630	EG:152A3.3, 152A3.3	dmel-5.43-X(+)::2056229-2066314	dmel-5.43-X	2056229	2066314	+	dmel-5.43-X::2048936-2072105	FlyFos025760	33862	2048936	2072105	FlyFos025760[6148-7210]	dmel-5.43-X(+)[2065959-2065958]		grows	[NGS] validated	fully_covered;no mut;flipped	fully_covered	no mut	flipped	53	285	235	0	0	0							14365767356821757_C01	58519847_69_C_1_6148_7210_dmel-5.43-X_2065959_2065958
14365767356821757_C02	https://transgeneome.mpi-cbg.de/transgeneomics/public/clone.html?wellId=59054821	FlyFos025786(CG12853[41851]::S000169_fly_pretag)::2XTY1-SGFP-V5-preTEV-BLRP-3XFLAGdFRT	FBgn0040747	CG12853	bs26d12.y1, NEST:bs26d12	dmel-5.43-2R(+)::10821020-10821418	dmel-5.43-2R	10821020	10821418	+	dmel-5.43-2R::10789114-10832984	FlyFos025786	54563	10789114	10832984	FlyFos025786[32222-33284]	dmel-5.43-2R(+)[10789114-10832984]		grows	[NGS] validated	fully_covered;no mut;flipped	fully_covered	no mut	flipped	42	258	190	0	0	0							14365767356821757_C02	58519847_69_C_2_32222_33284_dmel-5.43-2R_10789114_10832984
14365767356821757_C04	https://transgeneome.mpi-cbg.de/transgeneomics/public/clone.html?wellId=59054949	FlyFos025815(CG42559[25654]::S000169_fly_pretag)::2XTY1-SGFP-V5-preTEV-BLRP-3XFLAGdFRT	FBgn0260761	CG42559	CG30182	dmel-5.43-2R(-)::19487051-19488310	dmel-5.43-2R	19487051	19488310	-	dmel-5.43-2R::19471560-19506008	FlyFos025815	45141	19471560	19506008	FlyFos025815[16025-17087]	dmel-5.43-2R(-)[19471560-19506008]		grows	[NGS] validated	fully_covered;no mut;flipped	fully_covered	no mut	flipped	13	28	70	0	0	0							14365767356821757_C04	58519847_69_C_4_16025_17087_dmel-5.43-2R_19471560_19506008
14365767356821757_C06	https://transgeneome.mpi-cbg.de/transgeneomics/public/clone.html?wellId=59055077	FlyFos025854(Gyc32E[25101]::S000169_fly_pretag)::2XTY1-SGFP-V5-preTEV-BLRP-3XFLAGdFRT	FBgn0010197	Gyc32E	Guanyl cyclase at 32E, Guanylate cyclase receptor-type, GC, DMRGC, CG6275, Gyc-r, Cyg1, CG33114, GYC 32E	dmel-5.43-2L(-)::11138801-11148875	dmel-5.43-2L	11138801	11148875	-	dmel-5.43-2L::11123333-11154220	FlyFos025854	41580	11123333	11154220	FlyFos025854[15472-16534]	dmel-5.43-2L(-)[11123333-11154220]		grows	[NGS] validated	fully_covered;no mut;flipped	fully_covered	no mut	flipped	51	339	331	0	0	0							14365767356821757_C06	58519847_69_C_6_15472_16534_dmel-5.43-2L_11123333_11154220
14365767356821757_C07	https://transgeneome.mpi-cbg.de/transgeneomics/public/clone.html?wellId=59055141	FlyFos025862(CG14135[33186]::S000169_fly_pretag)::2XTY1-SGFP-V5-preTEV-BLRP-3XFLAGdFRT	FBgn0036193	CG14135		dmel-5.43-3L(+)::11684747-11685857	dmel-5.43-3L	11684747	11685857	+	dmel-5.43-3L::11662177-11699790	FlyFos025862	48306	11662177	11699790	FlyFos025862[23557-24619]	dmel-5.43-3L(+)[11662177-11699790]		grows	[NGS] validated	fully_covered;no mut;flipped	fully_covered	no mut	flipped	20	104	76	0	0	0							14365767356821757_C07	58519847_69_C_7_23557_24619_dmel-5.43-3L_11662177_11699790
14365767356821757_C08	https://transgeneome.mpi-cbg.de/transgeneomics/public/clone.html?wellId=59055205	FlyFos025885(CG6138[38880]::S000169_fly_pretag)::2XTY1-SGFP-V5-preTEV-BLRP-3XFLAGdFRT	FBgn0032268	CG6138	BcDNA:AT25107	dmel-5.43-2L(+)::10567290-10568012	dmel-5.43-2L	10567290	10568012	+	dmel-5.43-2L::10559390-10597187	FlyFos025885	48490	10559390	10597187	FlyFos025885[29251-30313]	dmel-5.43-2L(+)[10567938-10567937]		grows	[NGS] validated	fully_covered;no mut;flipped	fully_covered	no mut	flipped	39	210	226	0	0	0							14365767356821757_C08	58519847_69_C_8_29251_30313_dmel-5.43-2L_10567938_10567937
14365767356821757_C09	https://transgeneome.mpi-cbg.de/transgeneomics/public/clone.html?wellId=59055269	FlyFos025890(CG9288[20846]::S000169_fly_pretag)::2XTY1-SGFP-V5-preTEV-BLRP-3XFLAGdFRT	FBgn0260464	CG9288	Dromel_CG9288_FBtr0082829_pyruvatekinasedomain_mORF	dmel-5.43-3R(+)::9605303-9606517	dmel-5.43-3R	9605303	9606517	+	dmel-5.43-3R::9577202-9617603	FlyFos025890	51094	9577202	9617603	FlyFos025890[11217-12279]	dmel-5.43-3R(+)[9606388-9606387]		grows	[NGS] validated	fully_covered;no mut;flipped	fully_covered	no mut	flipped	33	300	255	0	0	0							14365767356821757_C09	58519847_69_C_9_11217_12279_dmel-5.43-3R_9606388_9606387
14365767356821757_C10	https://transgeneome.mpi-cbg.de/transgeneomics/public/clone.html?wellId=59055333	FlyFos025897(bgcn[34260]::S000169_fly_pretag)::2XTY1-SGFP-V5-preTEV-BLRP-3XFLAGdFRT	FBgn0004581	bgcn	benign gonial cell neoplasm, benign-(2)-gonial-cell-neoplasm, cell neoplasm, benign gonial cell neoplasia, benign gonial, Putative nuclear binding protein, gonial-cell-neoplasm, peppercorn, CG10331, cg10331, fs(2)eo-C, CG10330, gcn, fs(2)eoQS2, PNBP, Bgcn, b(2)gcn, BGCN, CG30170, bcgn, fs(2)eo6, pep, ben(2)gcn, b(2)cgn	dmel-5.43-2R(-)::19740801-19746314	dmel-5.43-2R	19740801	19746314	-	dmel-5.43-2R::19732202-19765714	FlyFos025897	44205	19732202	19765714	FlyFos025897[24631-25693]	dmel-5.43-2R(-)[19741085-19741084]		grows	[NGS] validated	fully_covered;no mut;flipped	fully_covered	no mut	flipped	25	100	138	0	0	0							14365767356821757_C10	58519847_69_C_10_24631_25693_dmel-5.43-2R_19741085_19741084
14365767356821757_C11	https://transgeneome.mpi-cbg.de/transgeneomics/public/clone.html?wellId=59055397	FlyFos025906(CG6053[37797]::S000169_fly_pretag)::2XTY1-SGFP-V5-preTEV-BLRP-3XFLAGdFRT	FBgn0036195	CG6053		dmel-5.43-3L(-)::11690226-11692363	dmel-5.43-3L	11690226	11692363	-	dmel-5.43-3L::11662179-11699792	FlyFos025906	48306	11662179	11699792	FlyFos025906[28168-29230]	dmel-5.43-3L(-)[11662179-11699792]		grows	[NGS] validated	fully_covered;no mut;flipped	fully_covered	no mut	flipped	42	201	243	0	0	0							14365767356821757_C11	58519847_69_C_11_28168_29230_dmel-5.43-3L_11662179_11699792
14365767356821757_C12	https://transgeneome.mpi-cbg.de/transgeneomics/public/clone.html?wellId=59055461	FlyFos025910(Osi10[21373]::S000169_fly_pretag)::2XTY1-SGFP-V5-preTEV-BLRP-3XFLAGdFRT	FBgn0037417	Osi10	Osiris 10, Osiris, CG15593	dmel-5.43-3R(+)::2089581-2093117	dmel-5.43-3R	2089581	2093117	+	dmel-5.43-3R::2065501-2104857	FlyFos025910	50049	2065501	2104857	FlyFos025910[11744-12806]	dmel-5.43-3R(+)[2093115-2093114]		grows	[NGS] validated	fully_covered;no mut;flipped	fully_covered	no mut	flipped	28	152	126	0	0	0							14365767356821757_C12	58519847_69_C_12_11744_12806_dmel-5.43-3R_2093115_2093114
14365767356821757_D01	https://transgeneome.mpi-cbg.de/transgeneomics/public/clone.html?wellId=59054765	FlyFos025763(CG17333[25538]::S000169_fly_pretag)::2XTY1-SGFP-V5-preTEV-BLRP-3XFLAGdFRT	FBgn0030239	CG17333		dmel-5.43-X(+)::10741529-10742567	dmel-5.43-X	10741529	10742567	+	dmel-5.43-X::10724986-10758419	FlyFos025763	44126	10724986	10758419	FlyFos025763[15909-16971]	dmel-5.43-X(+)[10742512-10742511]		grows	[NGS] validated	fully_covered;no mut;flipped	fully_covered	no mut	flipped	43	305	262	0	0	0							14365767356821757_D01	58519847_69_D_1_15909_16971_dmel-5.43-X_10742512_10742511
14365767356821757_D02	https://transgeneome.mpi-cbg.de/transgeneomics/public/clone.html?wellId=59054829	FlyFos025789(Patronin[18644]::S000169_fly_pretag)::2XTY1-SGFP-V5-preTEV-BLRP-3XFLAGdFRT	FBgn0263197	Patronin	Patronin, lethal (2) k07433, short spindle 4, ssp4, l(2)k07433, CG18460, CG33130, Ssp4, CG18462, BcDNA:LD17191, CG18459, CG30102, CG6516	dmel-5.43-2R(-)::13406523-13422942	dmel-5.43-2R	13406523	13422942	-	dmel-5.43-2R::13398929-13430501	FlyFos025789	42265	13398929	13430501	FlyFos025789[9015-10077]	dmel-5.43-2R(-)[13398929-13430501]		grows	[NGS] validated	fully_covered;no mut;flipped	fully_covered	no mut	flipped	12	42	52	0	0	0							14365767356821757_D02	58519847_69_D_2_9015_10077_dmel-5.43-2R_13398929_13430501
14365767356821757_D03	https://transgeneome.mpi-cbg.de/transgeneomics/public/clone.html?wellId=59054893	FlyFos025813(CG3092[13976]::S000169_fly_pretag)::2XTY1-SGFP-V5-preTEV-BLRP-3XFLAGdFRT	FBgn0034835	CG3092	anon-WO0140519.90	dmel-5.43-2R(+)::19120149-19121451	dmel-5.43-2R	19120149	19121451	+	dmel-5.43-2R::19088652-19125702	FlyFos025813	47743	19088652	19125702	FlyFos025813[4347-5409]	dmel-5.43-2R(+)[19121357-19121356]		grows	[NGS] validated	fully_covered;no mut;flipped	fully_covered	no mut	flipped	44	263	264	0	0	0							14365767356821757_D03	58519847_69_D_3_4347_5409_dmel-5.43-2R_19121357_19121356
14365767356821757_D04	https://transgeneome.mpi-cbg.de/transgeneomics/public/clone.html?wellId=59054957	FlyFos025815(CG10332[26872]::S000169_fly_pretag)::2XTY1-SGFP-V5-preTEV-BLRP-3XFLAGdFRT	FBgn0260455	CG10332	CG10332-ORFA, anon-WO0153538.56, anon-WO0153538.57, anon-WO0153538.58, BcDNA:AT19986	dmel-5.43-2R(-)::19488437-19489296	dmel-5.43-2R	19488437	19489296	-	dmel-5.43-2R::19471560-19506008	FlyFos025815	45141	19471560	19506008	FlyFos025815[17243-18305]	dmel-5.43-2R(-)[19471560-19506008]		grows	[NGS] validated	fully_covered;no mut;flipped	fully_covered	no mut	flipped	13	93	97	0	0	0							14365767356821757_D04	58519847_69_D_4_17243_18305_dmel-5.43-2R_19471560_19506008
14365767356821757_D05	https://transgeneome.mpi-cbg.de/transgeneomics/public/clone.html?wellId=59055021	FlyFos025843(Ugt37a1[45206]::S000169_fly_pretag)::2XTY1-SGFP-V5-preTEV-BLRP-3XFLAGdFRT	FBgn0026756	Ugt37a1	UDP-glycosyltransferase 37a1, DmeUgt37a1, 38C.41, CG11012, DmUgt37a1	dmel-5.43-2L(-)::20372473-20373967	dmel-5.43-2L	20372473	20373967	-	dmel-5.43-2L::20366652-20408051	FlyFos025843	52092	20366652	20408051	FlyFos025843[35577-36639]	dmel-5.43-2L(-)[20372476-20372475]		grows	[NGS] validated	fully_covered;no mut;flipped	fully_covered	no mut	flipped	6	23	72	0	0	0							14365767356821757_D05	58519847_69_D_5_35577_36639_dmel-5.43-2L_20372476_20372475
14365767356821757_D06	https://transgeneome.mpi-cbg.de/transgeneomics/public/clone.html?wellId=59055085	FlyFos025858(Ady43A[30318]::S000169_fly_pretag)::2XTY1-SGFP-V5-preTEV-BLRP-3XFLAGdFRT	FBgn0026602	Ady43A	Ady43A, ady43A, Ady, Adk43A, CG1851	dmel-5.43-2R(-)::3130529-3133263	dmel-5.43-2R	3130529	3133263	-	dmel-5.43-2R::3113329-3151846	FlyFos025858	49210	3113329	3151846	FlyFos025858[20689-21751]	dmel-5.43-2R(-)[3131159-3131158]		grows	[NGS] validated	fully_covered;no mut;flipped	fully_covered	no mut	flipped	27	111	146	0	0	0							14365767356821757_D06	58519847_69_D_6_20689_21751_dmel-5.43-2R_3131159_3131158
14365767356821757_D07	https://transgeneome.mpi-cbg.de/transgeneomics/public/clone.html?wellId=59055149	FlyFos025862(Sug[29011]::S000169_fly_pretag)::2XTY1-SGFP-V5-preTEV-BLRP-3XFLAGdFRT	FBgn0036191	Sug	Sug, Sugar-baby, CG7334	dmel-5.43-3L(+)::11677084-11683255	dmel-5.43-3L	11677084	11683255	+	dmel-5.43-3L::11662177-11699790	FlyFos025862	48306	11662177	11699790	FlyFos025862[19382-20444]	dmel-5.43-3L(+)[11662177-11699790]		grows	[NGS] validated	fully_covered;no mut;flipped	fully_covered	no mut	flipped	10	111	69	0	0	0							14365767356821757_D07	58519847_69_D_7_19382_20444_dmel-5.43-3L_11662177_11699790
14365767356821757_D08	https://transgeneome.mpi-cbg.de/transgeneomics/public/clone.html?wellId=59055213	FlyFos025885(CG34161[25724]::S000169_fly_pretag)::2XTY1-SGFP-V5-preTEV-BLRP-3XFLAGdFRT	FBgn0085190	CG34161		dmel-5.43-2L(-)::10580966-10581662	dmel-5.43-2L	10580966	10581662	-	dmel-5.43-2L::10559390-10597187	FlyFos025885	48490	10559390	10597187	FlyFos025885[16095-17157]	dmel-5.43-2L(-)[10581094-10581093]		grows	[NGS] validated	fully_covered;no mut;flipped	fully_covered	no mut	flipped	7	35	52	0	0	0							14365767356821757_D08	58519847_69_D_8_16095_17157_dmel-5.43-2L_10581094_10581093
14365767356821757_D11	https://transgeneome.mpi-cbg.de/transgeneomics/public/clone.html?wellId=59055405	FlyFos025906(CG11652[34700]::S000169_fly_pretag)::2XTY1-SGFP-V5-preTEV-BLRP-3XFLAGdFRT	FBgn0036194	CG11652		dmel-5.43-3L(-)::11686979-11690086	dmel-5.43-3L	11686979	11690086	-	dmel-5.43-3L::11662179-11699792	FlyFos025906	48306	11662179	11699792	FlyFos025906[25071-26133]	dmel-5.43-3L(-)[11662179-11699792]		grows	[NGS] validated	fully_covered;no mut;flipped	fully_covered	no mut	flipped	27	197	141	0	0	0							14365767356821757_D11	58519847_69_D_11_25071_26133_dmel-5.43-3L_11662179_11699792
14365767356821757_D12	https://transgeneome.mpi-cbg.de/transgeneomics/public/clone.html?wellId=59055469	FlyFos025911(Ir25a[21986]::S000169_fly_pretag)::2XTY1-SGFP-V5-preTEV-BLRP-3XFLAGdFRT	FBgn0031634	Ir25a	Ionotropic receptor 25a, CG15627, ionotropic receptor 25a, CG15627, CT35778, IR25a	dmel-5.43-2L(-)::4830846-4835300	dmel-5.43-2L	4830846	4835300	-	dmel-5.43-2L::4818615-4856947	FlyFos025911	49025	4818615	4856947	FlyFos025911[12357-13419]	dmel-5.43-2L(-)[4818615-4856947]		grows	[NGS] validated	fully_covered;no mut;flipped	fully_covered	no mut	flipped	39	181	197	0	0	0							14365767356821757_D12	58519847_69_D_12_12357_13419_dmel-5.43-2L_4818615_4856947
14365767356821757_E01	https://transgeneome.mpi-cbg.de/transgeneomics/public/clone.html?wellId=59054773	FlyFos025777(CG1750[22932]::S000169_fly_pretag)::2XTY1-SGFP-V5-preTEV-BLRP-3XFLAGdFRT	FBgn0039836	CG1750		dmel-5.43-3R(-)::27079373-27080622	dmel-5.43-3R	27079373	27080622	-	dmel-5.43-3R::27066082-27098643	FlyFos025777	43254	27066082	27098643	FlyFos025777[13303-14365]	dmel-5.43-3R(-)[27066082-27098643]		grows	[NGS] validated	fully_covered;no mut;flipped	fully_covered	no mut	flipped	43	186	221	0	0	0							14365767356821757_E01	58519847_69_E_1_13303_14365_dmel-5.43-3R_27066082_27098643
14365767356821757_E02	https://transgeneome.mpi-cbg.de/transgeneomics/public/clone.html?wellId=59054837	FlyFos025794(CG43228[16465]::S000169_fly_pretag)::2XTY1-SGFP-V5-preTEV-BLRP-3XFLAGdFRT	FBgn0262873	CG43228	Chr3R_25434193_25434663.0	dmel-5.43-3R(+)::25434199-25434576	dmel-5.43-3R	25434199	25434576	+	dmel-5.43-3R::25427739-25458392	FlyFos025794	41346	25427739	25458392	FlyFos025794[6836-7898]	dmel-5.43-3R(+)[25427739-25458392]		grows	[NGS] validated	fully_covered;no mut;flipped	fully_covered	no mut	flipped	14	65	62	0	0	0							14365767356821757_E02	58519847_69_E_2_6836_7898_dmel-5.43-3R_25427739_25458392
[truncated: 11,467 more rows]

## Sheet: S2-sGFP pilot
Plate	Barcode	RempBarcode	Well	2D Barcode	Clone	Clone ID	Clone Start	Clone End	Ensembl	Gene	Alias	Gene Id	Gene Start	Gene End	Strand	Gene Chromosome	Construct Length	Grows in selection	Junction Tag L	Junction Tag R	URL
[truncated: 644 more rows]

## Sheet: S3-sGFPnls pilot
Plate	Barcode	RempBarcode	Well	2D Barcode	Clone	Clone ID	Clone Start	Clone End	Ensembl	Gene	Alias	Gene Id	Gene Start	Gene End	Strand	Gene Chromosome	Construct Length	Grows in selection	Whole Tag Sanger Sequencing Status	URL
[truncated: 273 more rows]

[truncated: 2 more sheets: S4-sGFP-BLRP pilot, S5- gene summary]
