# Supplementary material for: A genome-wide resource for the analysis of protein localisation in Drosophila
Source: eLife. 2016 Feb 20;5:e12068. doi: 10.7554/eLife.12068 (PMC4805545; doi:10.7554/eLife.12068)
Supplement: Supplementary file 2. — Table listing all 880 transgenic FlyFos (fTRG) lines, with fTRG numbers, construct and clones names, as well as nature of the tag and the used landing site. The second sheet compares the genes tagged by the fTRG lines to the available GFP gene trap lines. 765 genes are only found in the TransgeneOme resource. DOI: http://dx.doi.org/10.7554/eLife.12068.034 [file elife-12068-supp2.xlsx]

## Sheet: All_transgenic_lines
fTRG line	Construct	Gene	Created	Creator	Clone Name	Tag	Landing site
1	03355975781483189 A02	mfas	2012-01-16	Frank Schnorrer	FlyFos015057(pRedFlp-Hgr)(mfas[17074]::2XTY1-SGFP-V5-preTEV-BLRP-3XFLAG)dFRT	2XTY1-SGFP-V5-preTEV-BLRP-3XFLAG	VK00033
3	03355975781483189 A03	bam	2012-01-16	Frank Schnorrer	FlyFos015150(pRedFlp-Hgr)(bam[29830]::2XTY1-SGFP-V5-preTEV-BLRP-3XFLAG)dFRT	2XTY1-SGFP-V5-preTEV-BLRP-3XFLAG	VK00033
4	03355975781483189 A04	Dp	2012-01-16	Frank Schnorrer	FlyFos015209(pRedFlp-Hgr)(Dp[32599]::2XTY1-SGFP-V5-preTEV-BLRP-3XFLAG)dFRT	2XTY1-SGFP-V5-preTEV-BLRP-3XFLAG	VK00033
6	03355975781483189 A06	ebi	2012-01-16	Frank Schnorrer	FlyFos015533(pRedFlp-Hgr)(ebi[22968]::2XTY1-SGFP-V5-preTEV-BLRP-3XFLAG)dFRT	2XTY1-SGFP-V5-preTEV-BLRP-3XFLAG	VK00033
8	03355975781483189 A08	CG6151	2012-01-16	Frank Schnorrer	FlyFos015722(pRedFlp-Hgr)(CG6151[36522]::2XTY1-SGFP-V5-preTEV-BLRP-3XFLAG)dFRT	2XTY1-SGFP-V5-preTEV-BLRP-3XFLAG	VK00033
9	03355975781483189 B01	CG4702	2012-01-16	Frank Schnorrer	FlyFos014971(pRedFlp-Hgr)(CG4702[22910]::2XTY1-SGFP-V5-preTEV-BLRP-3XFLAG)dFRT	2XTY1-SGFP-V5-preTEV-BLRP-3XFLAG	VK00033
11	03355975781483189 B03	Hmx	2012-01-16	Frank Schnorrer	FlyFos015215(pRedFlp-Hgr)(Hmx[35549]::2XTY1-SGFP-V5-preTEV-BLRP-3XFLAG)dFRT	2XTY1-SGFP-V5-preTEV-BLRP-3XFLAG	VK00033
13	03355975781483189 B06	CG10096	2012-01-17	Frank Schnorrer	FlyFos015516(pRedFlp-Hgr)(CG10096[35332]::2XTY1-SGFP-V5-preTEV-BLRP-3XFLAG)dFRT	2XTY1-SGFP-V5-preTEV-BLRP-3XFLAG	VK00033
16	03355975781483189 B02	pyr	2012-01-17	Frank Schnorrer	FlyFos015082(pRedFlp-Hgr)(pyr[16482]::2XTY1-SGFP-V5-preTEV-BLRP-3XFLAG)dFRT	2XTY1-SGFP-V5-preTEV-BLRP-3XFLAG	VK00033
17	03355975781483189 B07	sc	2012-01-17	Frank Schnorrer	FlyFos015631(pRedFlp-Hgr)(sc[17538]::2XTY1-SGFP-V5-preTEV-BLRP-3XFLAG)dFRT	2XTY1-SGFP-V5-preTEV-BLRP-3XFLAG	VK00033
19	03355975781483189 B04	Eph	2012-01-17	Frank Schnorrer	FlyFos015198(pRedFlp-Hgr)(Eph[21478]::2XTY1-SGFP-V5-preTEV-BLRP-3XFLAG)dFRT	2XTY1-SGFP-V5-preTEV-BLRP-3XFLAG	VK00033
21	03355975781483189 B08	gro	2012-01-30	Frank Schnorrer	FlyFos015754(pRedFlp-Hgr)(gro[17173]::2XTY1-SGFP-V5-preTEV-BLRP-3XFLAG)dFRT	2XTY1-SGFP-V5-preTEV-BLRP-3XFLAG	VK00033
23	03355975781483189 B10	dimm	2012-01-30	Frank Schnorrer	FlyFos015908(pRedFlp-Hgr)(dimm[17787]::2XTY1-SGFP-V5-preTEV-BLRP-3XFLAG)dFRT	2XTY1-SGFP-V5-preTEV-BLRP-3XFLAG	VK00033
25	03355975781483189 B09	numb	2012-01-30	Frank Schnorrer	FlyFos015836(pRedFlp-Hgr)(numb[41193]::2XTY1-SGFP-V5-preTEV-BLRP-3XFLAG)dFRT	2XTY1-SGFP-V5-preTEV-BLRP-3XFLAG	VK00033
27	03355975781483189 D05	ro	2012-02-07	Frank Schnorrer	FlyFos015558(pRedFlp-Hgr)(ro[26922]::2XTY1-SGFP-V5-preTEV-BLRP-3XFLAG)dFRT	2XTY1-SGFP-V5-preTEV-BLRP-3XFLAG	VK00033
28	03355975781483189 D08	sec15	2012-02-07	Frank Schnorrer	FlyFos015736(pRedFlp-Hgr)(sec15[32881]::2XTY1-SGFP-V5-preTEV-BLRP-3XFLAG)dFRT	2XTY1-SGFP-V5-preTEV-BLRP-3XFLAG	VK00033
29	03355975781483189 C02	dl	2012-02-07	Frank Schnorrer	FlyFos014993(pRedFlp-Hgr)(dl[31677]::2XTY1-SGFP-V5-preTEV-BLRP-3XFLAG)dFRT	2XTY1-SGFP-V5-preTEV-BLRP-3XFLAG	VK00033
31	03355975781483189 C06	Rho1	2012-02-07	Frank Schnorrer	FlyFos015538(pRedFlp-Hgr)(Rho1[19683]::2XTY1-SGFP-V5-preTEV-BLRP-3XFLAG)dFRT	2XTY1-SGFP-V5-preTEV-BLRP-3XFLAG	VK00033
32	03355975781483189 C12	BM-40-SPARC	2012-02-07	Frank Schnorrer	FlyFos016090(pRedFlp-Hgr)(BM-40-SPARC[36820]::2XTY1-SGFP-V5-preTEV-BLRP-3XFLAG)dFRT	2XTY1-SGFP-V5-preTEV-BLRP-3XFLAG	VK00033
34	8431894728673938 B08	Mnt	2012-02-15	Frank Schnorrer	FlyFos018703(pRedFlp-Hgr)(Mnt[42636]::2XTY1-SGFP-V5-preTEV-BLRP-3XFLAG)dFRT	2XTY1-SGFP-V5-preTEV-BLRP-3XFLAG	VK00033
39	03355975781483189 G09	sens	2012-02-15	Frank Schnorrer	FlyFos015942(pRedFlp-Hgr)(sens[31022]::2XTY1-SGFP-V5-preTEV-BLRP-3XFLAG)dFRT	2XTY1-SGFP-V5-preTEV-BLRP-3XFLAG	VK00033
40	03355975781483189 H09	ey	2012-02-15	Frank Schnorrer	FlyFos015860(pRedFlp-Hgr)(ey[13630]::2XTY1-SGFP-V5-preTEV-BLRP-3XFLAG)dFRT	2XTY1-SGFP-V5-preTEV-BLRP-3XFLAG	VK00033
42	03355975781483189 H11	CG1620	2012-02-15	Frank Schnorrer	FlyFos016053(pRedFlp-Hgr)(CG1620[13120]::2XTY1-SGFP-V5-preTEV-BLRP-3XFLAG)dFRT	2XTY1-SGFP-V5-preTEV-BLRP-3XFLAG	VK00033
45	03355975781483189 F05	Sox15	2012-02-15	Frank Schnorrer	FlyFos015506(pRedFlp-Hgr)(Sox15[37657]::2XTY1-SGFP-V5-preTEV-BLRP-3XFLAG)dFRT	2XTY1-SGFP-V5-preTEV-BLRP-3XFLAG	VK00033
47	6290259782156287 D06	odd	2012-02-15	Frank Schnorrer	FlyFos016895(pRedFlp-Hgr)(odd[24901]::2XTY1-SGFP-V5-preTEV-BLRP-3XFLAG)dFRT	2XTY1-SGFP-V5-preTEV-BLRP-3XFLAG	VK00033
48	03355975781483189 E07	ftz	2012-02-16	Frank Schnorrer	FlyFos015695(pRedFlp-Hgr)(ftz[27574]::2XTY1-SGFP-V5-preTEV-BLRP-3XFLAG)dFRT	2XTY1-SGFP-V5-preTEV-BLRP-3XFLAG	VK00033
50	03355975781483189 D06	l(1)sc	2012-02-20	Frank Schnorrer	FlyFos015631(pRedFlp-Hgr)(l(1)sc[30893]::2XTY1-SGFP-V5-preTEV-BLRP-3XFLAG)dFRT	2XTY1-SGFP-V5-preTEV-BLRP-3XFLAG	VK00033
51	8431894728673938 G09	Scr	2012-02-20	Frank Schnorrer	FlyFos018974(pRedFlp-Hgr)(Scr[19370]::2XTY1-SGFP-V5-preTEV-BLRP-3XFLAG)dFRT	2XTY1-SGFP-V5-preTEV-BLRP-3XFLAG	VK00033
53	03355975781483189 D12	pyd3	2012-02-20	Frank Schnorrer	FlyFos016094(pRedFlp-Hgr)(pyd3[35931]::2XTY1-SGFP-V5-preTEV-BLRP-3XFLAG)dFRT	2XTY1-SGFP-V5-preTEV-BLRP-3XFLAG	VK00033
54	8431894728673938 H11	CG9876	2012-02-22	Frank Schnorrer	FlyFos019263(pRedFlp-Hgr)(CG9876[35835]::2XTY1-SGFP-V5-preTEV-BLRP-3XFLAG)dFRT	2XTY1-SGFP-V5-preTEV-BLRP-3XFLAG	VK00033
57	8431894728673938 A07	CG5625	2012-02-22	Frank Schnorrer	FlyFos018522(pRedFlp-Hgr)(CG5625[19638]::2XTY1-SGFP-V5-preTEV-BLRP-3XFLAG)dFRT	2XTY1-SGFP-V5-preTEV-BLRP-3XFLAG	VK00033
58	8431894728673938 C10	gsb	2012-02-23	Frank Schnorrer	FlyFos018998(pRedFlp-Hgr)(gsb[31960]::2XTY1-SGFP-V5-preTEV-BLRP-3XFLAG)dFRT	2XTY1-SGFP-V5-preTEV-BLRP-3XFLAG	VK00033
59	8431894728673938 E01	Tsc1	2012-02-28	Frank Schnorrer	FlyFos017829(pRedFlp-Hgr)(Tsc1[27551]::2XTY1-SGFP-V5-preTEV-BLRP-3XFLAG)dFRT	2XTY1-SGFP-V5-preTEV-BLRP-3XFLAG	VK00033
60	03355975781483189 A05	Slip1	2012-02-28	Frank Schnorrer	FlyFos015346(pRedFlp-Hgr)(Slip1[35404]::2XTY1-SGFP-V5-preTEV-BLRP-3XFLAG)dFRT	2XTY1-SGFP-V5-preTEV-BLRP-3XFLAG	VK00033
63	6290259782156287 A05	CG31772	2012-02-29	Frank Schnorrer	FlyFos016656(pRedFlp-Hgr)(CG31772[13966]::2XTY1-SGFP-V5-preTEV-BLRP-3XFLAG)dFRT	2XTY1-SGFP-V5-preTEV-BLRP-3XFLAG	VK00033
64	6290259782156287 B02	CG5899	2012-02-29	Frank Schnorrer	FlyFos016332(pRedFlp-Hgr)(CG5899[18606]::2XTY1-SGFP-V5-preTEV-BLRP-3XFLAG)dFRT	2XTY1-SGFP-V5-preTEV-BLRP-3XFLAG	VK00033
67	6290259782156287 C07	nerfin-2	2012-03-01	Frank Schnorrer	FlyFos016999(pRedFlp-Hgr)(nerfin-2[21034]::2XTY1-SGFP-V5-preTEV-BLRP-3XFLAG)dFRT	2XTY1-SGFP-V5-preTEV-BLRP-3XFLAG	VK00033
69	6290259782156287 D03	CG6470	2012-03-06	Frank Schnorrer	FlyFos016490(pRedFlp-Hgr)(CG6470[20248]::2XTY1-SGFP-V5-preTEV-BLRP-3XFLAG)dFRT	2XTY1-SGFP-V5-preTEV-BLRP-3XFLAG	VK00033
71	03355975781483189 E05	sna	2012-03-06	Frank Schnorrer	FlyFos015520(pRedFlp-Hgr)(sna[12780]::2XTY1-SGFP-V5-preTEV-BLRP-3XFLAG)dFRT	2XTY1-SGFP-V5-preTEV-BLRP-3XFLAG	VK00033
73	03355975781483189 F07	HLHm5	2012-03-07	Frank Schnorrer	FlyFos015754(pRedFlp-Hgr)(HLHm5[36657]::2XTY1-SGFP-V5-preTEV-BLRP-3XFLAG)dFRT	2XTY1-SGFP-V5-preTEV-BLRP-3XFLAG	VK00033
74	6290259782156287 E03	Sc2	2012-03-07	Frank Schnorrer	FlyFos016517(pRedFlp-Hgr)(Sc2[37230]::2XTY1-SGFP-V5-preTEV-BLRP-3XFLAG)dFRT	2XTY1-SGFP-V5-preTEV-BLRP-3XFLAG	VK00033
76	6290259782156287 B04	CG1021	2012-03-07	Frank Schnorrer	FlyFos016620(pRedFlp-Hgr)(CG1021[35801]::2XTY1-SGFP-V5-preTEV-BLRP-3XFLAG)dFRT	2XTY1-SGFP-V5-preTEV-BLRP-3XFLAG	VK00033
78	6290259782156287 D01	Act88F	2012-03-07	Frank Schnorrer	FlyFos016146(pRedFlp-Hgr)(Act88F[36063]::2XTY1-SGFP-V5-preTEV-BLRP-3XFLAG)dFRT	2XTY1-SGFP-V5-preTEV-BLRP-3XFLAG	VK00033
82	03355975781483189 C08	ptc	2012-03-19	Frank Schnorrer	FlyFos015706(pRedFlp-Hgr)(ptc[28229]::2XTY1-SGFP-V5-preTEV-BLRP-3XFLAG)dFRT	2XTY1-SGFP-V5-preTEV-BLRP-3XFLAG	VK00033
84	8431894728673938 D12	p53	2012-03-19	Frank Schnorrer	FlyFos019304(pRedFlp-Hgr)(p53[40564]::2XTY1-SGFP-V5-preTEV-BLRP-3XFLAG)dFRT	2XTY1-SGFP-V5-preTEV-BLRP-3XFLAG	VK00033
85	8431894728673938 G11	Dr	2012-03-19	Frank Schnorrer	FlyFos019265(pRedFlp-Hgr)(Dr[33176]::2XTY1-SGFP-V5-preTEV-BLRP-3XFLAG)dFRT	2XTY1-SGFP-V5-preTEV-BLRP-3XFLAG	VK00033
87	03355975781483189 G04	Blimp-1	2012-03-19	Frank Schnorrer	FlyFos015316(pRedFlp-Hgr)(Blimp-1[18545]::2XTY1-SGFP-V5-preTEV-BLRP-3XFLAG)dFRT	2XTY1-SGFP-V5-preTEV-BLRP-3XFLAG	VK00033
88	8431894728673938 D02	Optix	2012-03-19	Frank Schnorrer	FlyFos017967(pRedFlp-Hgr)(Optix[45672]::2XTY1-SGFP-V5-preTEV-BLRP-3XFLAG)dFRT	2XTY1-SGFP-V5-preTEV-BLRP-3XFLAG	VK00033
91	8431894728673938 H07	fj	2012-03-19	Frank Schnorrer	FlyFos018590(pRedFlp-Hgr)(fj[35773]::2XTY1-SGFP-V5-preTEV-BLRP-3XFLAG)dFRT	2XTY1-SGFP-V5-preTEV-BLRP-3XFLAG	VK00033
92	8431894728673938 A05	CG32121	2012-03-19	Frank Schnorrer	FlyFos018167(pRedFlp-Hgr)(CG32121[17741]::2XTY1-SGFP-V5-preTEV-BLRP-3XFLAG)dFRT	2XTY1-SGFP-V5-preTEV-BLRP-3XFLAG	VK00033
94	8431894728673938 H06	ato	2012-03-19	Frank Schnorrer	FlyFos018487(pRedFlp-Hgr)(ato[37785]::2XTY1-SGFP-V5-preTEV-BLRP-3XFLAG)dFRT	2XTY1-SGFP-V5-preTEV-BLRP-3XFLAG	VK00033
96	03355975781483189 C07	GluRIIC	2012-03-26	Frank Schnorrer	FlyFos015605(pRedFlp-Hgr)(GluRIIC[20043]::2XTY1-SGFP-V5-preTEV-BLRP-3XFLAG)dFRT	2XTY1-SGFP-V5-preTEV-BLRP-3XFLAG	VK00033
97	8431894728673938 A08	knrl	2012-03-26	Frank Schnorrer	FlyFos018686(pRedFlp-Hgr)(knrl[41579]::2XTY1-SGFP-V5-preTEV-BLRP-3XFLAG)dFRT	2XTY1-SGFP-V5-preTEV-BLRP-3XFLAG	VK00033
99	03355975781483189 D03	CG17803	2012-03-26	Frank Schnorrer	FlyFos015235(pRedFlp-Hgr)(CG17803[36270]::2XTY1-SGFP-V5-preTEV-BLRP-3XFLAG)dFRT	2XTY1-SGFP-V5-preTEV-BLRP-3XFLAG	VK00033
101	03355975781483189 D02	Cp18	2012-03-26	Frank Schnorrer	FlyFos015007(pRedFlp-Hgr)(Cp18[27169]::2XTY1-SGFP-V5-preTEV-BLRP-3XFLAG)dFRT	2XTY1-SGFP-V5-preTEV-BLRP-3XFLAG	VK00033
103	03355975781483189 D07	CG9336	2012-03-27	Frank Schnorrer	FlyFos015601(pRedFlp-Hgr)(CG9336[29048]::2XTY1-SGFP-V5-preTEV-BLRP-3XFLAG)dFRT	2XTY1-SGFP-V5-preTEV-BLRP-3XFLAG	VK00033
105	03355975781483189 D01	uzip	2012-03-27	Frank Schnorrer	FlyFos014931(pRedFlp-Hgr)(uzip[33350]::2XTY1-SGFP-V5-preTEV-BLRP-3XFLAG)dFRT	2XTY1-SGFP-V5-preTEV-BLRP-3XFLAG	VK00033
107	03355975781483189 C03	Irbp	2012-03-27	Frank Schnorrer	FlyFos015211(pRedFlp-Hgr)(Irbp[19511]::2XTY1-SGFP-V5-preTEV-BLRP-3XFLAG)dFRT	2XTY1-SGFP-V5-preTEV-BLRP-3XFLAG	VK00033
108	6290259782156287 C03	sty	2012-04-02	Frank Schnorrer	FlyFos016427(pRedFlp-Hgr)(sty[15667]::2XTY1-SGFP-V5-preTEV-BLRP-3XFLAG)dFRT	2XTY1-SGFP-V5-preTEV-BLRP-3XFLAG	VK00033
109	6290259782156287 F03	CG11294	2012-04-02	Frank Schnorrer	FlyFos016594(pRedFlp-Hgr)(CG11294[29371]::2XTY1-SGFP-V5-preTEV-BLRP-3XFLAG)dFRT	2XTY1-SGFP-V5-preTEV-BLRP-3XFLAG	VK00033
112	8431894728673938 D09	D	2012-04-02	Frank Schnorrer	FlyFos018780(pRedFlp-Hgr)(D[35342]::2XTY1-SGFP-V5-preTEV-BLRP-3XFLAG)dFRT	2XTY1-SGFP-V5-preTEV-BLRP-3XFLAG	VK00033
113	6290259782156287 C01	CG18764	2012-04-02	Frank Schnorrer	FlyFos016148(pRedFlp-Hgr)(CG18764[34817]::2XTY1-SGFP-V5-preTEV-BLRP-3XFLAG)dFRT	2XTY1-SGFP-V5-preTEV-BLRP-3XFLAG	VK00033
115	6290259782156287 F02	E2f2	2012-04-03	Frank Schnorrer	FlyFos016361(pRedFlp-Hgr)(E2f2[18991]::2XTY1-SGFP-V5-preTEV-BLRP-3XFLAG)dFRT	2XTY1-SGFP-V5-preTEV-BLRP-3XFLAG	VK00033
117	6290259782156287 G01	CG2790	2012-04-03	Frank Schnorrer	FlyFos016251(pRedFlp-Hgr)(CG2790[21060]::2XTY1-SGFP-V5-preTEV-BLRP-3XFLAG)dFRT	2XTY1-SGFP-V5-preTEV-BLRP-3XFLAG	VK00033
121	6290259782156287 C05	CG12361	2012-04-24	Frank Schnorrer	FlyFos016807(pRedFlp-Hgr)(CG12361[33399]::2XTY1-SGFP-V5-preTEV-BLRP-3XFLAG)dFRT	2XTY1-SGFP-V5-preTEV-BLRP-3XFLAG	VK00033
122	6290259782156287 F05	Atg5	2012-04-25	Frank Schnorrer	FlyFos016751(pRedFlp-Hgr)(Atg5[26808]::2XTY1-SGFP-V5-preTEV-BLRP-3XFLAG)dFRT	2XTY1-SGFP-V5-preTEV-BLRP-3XFLAG	VK00033
124	6290259782156287 B06	Rca1	2012-04-25	Frank Schnorrer	FlyFos016801(pRedFlp-Hgr)(Rca1[33295]::2XTY1-SGFP-V5-preTEV-BLRP-3XFLAG)dFRT	2XTY1-SGFP-V5-preTEV-BLRP-3XFLAG	VK00033
125	6290259782156287 H03	fray	2012-04-25	Frank Schnorrer	FlyFos016585(pRedFlp-Hgr)(fray[16009]::2XTY1-SGFP-V5-preTEV-BLRP-3XFLAG)dFRT	2XTY1-SGFP-V5-preTEV-BLRP-3XFLAG	VK00033
127	6290259782156287 G05	wit	2012-04-26	Frank Schnorrer	FlyFos016775(pRedFlp-Hgr)(wit[39612]::2XTY1-SGFP-V5-preTEV-BLRP-3XFLAG)dFRT	2XTY1-SGFP-V5-preTEV-BLRP-3XFLAG	VK00033
128	6745694817474591 A12	vnd	2012-06-18	Frank Schnorrer	FlyFos021373(pRedFlp-Hgr)(vnd[35031]::2XTY1-SGFP-V5-preTEV-BLRP-3XFLAG)dFRT	2XTY1-SGFP-V5-preTEV-BLRP-3XFLAG	VK00033
129	6745694817474591 E03	par-6	2012-06-18	Frank Schnorrer	FlyFos019762(pRedFlp-Hgr)(par-6[32958]::2XTY1-SGFP-V5-preTEV-BLRP-3XFLAG)dFRT	2XTY1-SGFP-V5-preTEV-BLRP-3XFLAG	VK00033
131	6745694817474591 A11	stan	2012-06-18	Frank Schnorrer	FlyFos021125(pRedFlp-Hgr)(stan[14114]::2XTY1-SGFP-V5-preTEV-BLRP-3XFLAG)dFRT	2XTY1-SGFP-V5-preTEV-BLRP-3XFLAG	VK00033
134	03355975781483189 D09	eIF-4E	2012-06-18	Frank Schnorrer	FlyFos015794(pRedFlp-Hgr)(eIF-4E[34572]::2XTY1-SGFP-V5-preTEV-BLRP-3XFLAG)dFRT	2XTY1-SGFP-V5-preTEV-BLRP-3XFLAG	VK00033
137	6745694817474591 C04	crb	2012-06-18	Frank Schnorrer	FlyFos019790(pRedFlp-Hgr)(crb[16014]::2XTY1-SGFP-V5-preTEV-BLRP-3XFLAG)dFRT	2XTY1-SGFP-V5-preTEV-BLRP-3XFLAG	VK00033
138	6745694817474591 C07	pros	2012-06-22	Frank Schnorrer	FlyFos020764(pRedFlp-Hgr)(pros[15376]::2XTY1-SGFP-V5-preTEV-BLRP-3XFLAG)dFRT	2XTY1-SGFP-V5-preTEV-BLRP-3XFLAG	VK00033
139	6745694817474591 H05	hb	2012-06-22	Frank Schnorrer	FlyFos020395(pRedFlp-Hgr)(hb[19869]::2XTY1-SGFP-V5-preTEV-BLRP-3XFLAG)dFRT	2XTY1-SGFP-V5-preTEV-BLRP-3XFLAG	VK00033
140	6290259782156287 D04	esc	2012-06-22	Frank Schnorrer	FlyFos016660(pRedFlp-Hgr)(esc[41466]::2XTY1-SGFP-V5-preTEV-BLRP-3XFLAG)dFRT	2XTY1-SGFP-V5-preTEV-BLRP-3XFLAG	VK00033
141	6745694817474591 G04	zen	2012-06-22	Frank Schnorrer	FlyFos020005(pRedFlp-Hgr)(zen[25072]::2XTY1-SGFP-V5-preTEV-BLRP-3XFLAG)dFRT	2XTY1-SGFP-V5-preTEV-BLRP-3XFLAG	VK00033
142	03355975781483189 F06	aop	2012-06-22	Frank Schnorrer	FlyFos015644(pRedFlp-Hgr)(aop[27636]::2XTY1-SGFP-V5-preTEV-BLRP-3XFLAG)dFRT	2XTY1-SGFP-V5-preTEV-BLRP-3XFLAG	VK00033
143	24648923033663195 D05	dpp	2012-07-09	Frank Schnorrer	FlyFos022042(pRedFlp-Hgr)(dpp[45452]::2XTY1-SGFP-V5-preTEV-BLRP-3XFLAG)dFRT	2XTY1-SGFP-V5-preTEV-BLRP-3XFLAG	VK00033
144	24648923033663195 G03	pain	2012-07-10	Frank Schnorrer	FlyFos021752(pRedFlp-Hgr)(pain[22036]::2XTY1-SGFP-V5-preTEV-BLRP-3XFLAG)dFRT	2XTY1-SGFP-V5-preTEV-BLRP-3XFLAG	VK00033
145	24648923033663195 G11	Mmp1	2012-07-10	Frank Schnorrer	FlyFos022881(pRedFlp-Hgr)(Mmp1[42603]::2XTY1-SGFP-V5-preTEV-BLRP-3XFLAG)dFRT	2XTY1-SGFP-V5-preTEV-BLRP-3XFLAG	VK00033
146	24648923033663195 D01	srp	2012-07-10	Frank Schnorrer	FlyFos021556(pRedFlp-Hgr)(srp[46448]::2XTY1-SGFP-V5-preTEV-BLRP-3XFLAG)dFRT	2XTY1-SGFP-V5-preTEV-BLRP-3XFLAG	VK00033
147	8431894728673938 F05	CG15715	2012-07-10	Frank Schnorrer	FlyFos018293(pRedFlp-Hgr)(CG15715[35363]::2XTY1-SGFP-V5-preTEV-BLRP-3XFLAG)dFRT	2XTY1-SGFP-V5-preTEV-BLRP-3XFLAG	VK00033
148	24648923033663195 H07	ara	2012-07-10	Frank Schnorrer	FlyFos022470(pRedFlp-Hgr)(ara[34043]::2XTY1-SGFP-V5-preTEV-BLRP-3XFLAG)dFRT	2XTY1-SGFP-V5-preTEV-BLRP-3XFLAG	VK00033
149	24648923033663195 G08	Ets21C	2012-07-10	Frank Schnorrer	FlyFos022514(pRedFlp-Hgr)(Ets21C[43985]::2XTY1-SGFP-V5-preTEV-BLRP-3XFLAG)dFRT	2XTY1-SGFP-V5-preTEV-BLRP-3XFLAG	VK00033
150	5827172721875329 A12	tan	2012-07-10	Frank Schnorrer	FlyFos024779(pRedFlp-Hgr)(tan[16943]::2XTY1-SGFP-V5-preTEV-BLRP-3XFLAG)dFRT	2XTY1-SGFP-V5-preTEV-BLRP-3XFLAG	VK00033
151	5827172721875329 A10	orb2	2012-07-10	Frank Schnorrer	FlyFos024375(pRedFlp-Hgr)(orb2[14297]::2XTY1-SGFP-V5-preTEV-BLRP-3XFLAG)dFRT	2XTY1-SGFP-V5-preTEV-BLRP-3XFLAG	VK00033
152	03355975781483189 H01	klu	2012-07-10	Frank Schnorrer	FlyFos015039(pRedFlp-Hgr)(klu[13010]::2XTY1-SGFP-V5-preTEV-BLRP-3XFLAG)dFRT	2XTY1-SGFP-V5-preTEV-BLRP-3XFLAG	VK00033
153	24648923033663195 H09	HLH54F	2012-07-10	Frank Schnorrer	FlyFos022697(pRedFlp-Hgr)(HLH54F[33621]::2XTY1-SGFP-V5-preTEV-BLRP-3XFLAG)dFRT	2XTY1-SGFP-V5-preTEV-BLRP-3XFLAG	VK00033
154	06656881586833885 D01	GluRIIE	2012-07-20	Frank Schnorrer	FlyFos024881(pRedFlp-Hgr)(GluRIIE[25487]::2XTY1-SGFP-V5-preTEV-BLRP-3XFLAG)dFRT	2XTY1-SGFP-V5-preTEV-BLRP-3XFLAG	VK00033
155	06656881586833885 B08	SoxN	2012-07-20	Frank Schnorrer	FlyFos025994(pRedFlp-Hgr)(SoxN[20207]::2XTY1-SGFP-V5-preTEV-BLRP-3XFLAG)dFRT	2XTY1-SGFP-V5-preTEV-BLRP-3XFLAG	VK00033
156	8431894728673938 B09	CLIP-190	2012-07-24	Frank Schnorrer	FlyFos018813(pRedFlp-Hgr)(CLIP-190[13220]::2XTY1-SGFP-V5-preTEV-BLRP-3XFLAG)dFRT	2XTY1-SGFP-V5-preTEV-BLRP-3XFLAG	VK00033
158	24648923033663195 H11	ergic53	2012-07-24	Frank Schnorrer	FlyFos022853(pRedFlp-Hgr)(ergic53[22547]::2XTY1-SGFP-V5-preTEV-BLRP-3XFLAG)dFRT	2XTY1-SGFP-V5-preTEV-BLRP-3XFLAG	VK00033
160	1582528031925018 H12	bap	2012-08-23	Frank Schnorrer	FlyFos028001(pRedFlp-Hgr)(bap[33955]::2XTY1-SGFP-V5-preTEV-BLRP-3XFLAG)dFRT	2XTY1-SGFP-V5-preTEV-BLRP-3XFLAG	VK00033
161	6196214900843875 E05	myoglianin	2012-08-23	Frank Schnorrer	FlyFos030786(pRedFlp-Hgr)(myoglianin[20818]::2XTY1-SGFP-V5-preTEV-BLRP-3XFLAG)dFRT	2XTY1-SGFP-V5-preTEV-BLRP-3XFLAG	VK00033
163	014526891357111271 F12	tj	2012-08-23	Frank Schnorrer	FlyFos030028(pRedFlp-Hgr)(tj[31267]::2XTY1-SGFP-V5-preTEV-BLRP-3XFLAG)dFRT	2XTY1-SGFP-V5-preTEV-BLRP-3XFLAG	VK00033
164	1582528031925018 E06	yrt	2012-08-23	Frank Schnorrer	FlyFos027098(pRedFlp-Hgr)(yrt[19587]::2XTY1-SGFP-V5-preTEV-BLRP-3XFLAG)dFRT	2XTY1-SGFP-V5-preTEV-BLRP-3XFLAG	VK00033
165	6196214900843875 H05	salm	2012-08-23	Frank Schnorrer	FlyFos030836(pRedFlp-Hgr)(salm[30926]::2XTY1-SGFP-V5-preTEV-BLRP-3XFLAG)dFRT	2XTY1-SGFP-V5-preTEV-BLRP-3XFLAG	VK00033
166	06656881586833885 H04	dei	2012-08-30	Frank Schnorrer	FlyFos025428(pRedFlp-Hgr)(dei[30293]::2XTY1-SGFP-V5-preTEV-BLRP-3XFLAG)dFRT	2XTY1-SGFP-V5-preTEV-BLRP-3XFLAG	VK00033
168	03355975781483189 C04	Sip1	2012-09-07	Vijay Raghavan	FlyFos015214(pRedFlp-Hgr)(Sip1[36129]::2XTY1-SGFP-V5-preTEV-BLRP-3XFLAG)dFRT	2XTY1-SGFP-V5-preTEV-BLRP-3XFLAG	VK00033
170	03355975781483189 D10	CG6813	2012-09-07	Vijay Raghavan	FlyFos015948(pRedFlp-Hgr)(CG6813[33126]::2XTY1-SGFP-V5-preTEV-BLRP-3XFLAG)dFRT	2XTY1-SGFP-V5-preTEV-BLRP-3XFLAG	VK00033
176	03355975781483189 B12	CG31534	2012-09-07	Vijay Raghavan	FlyFos016086(pRedFlp-Hgr)(CG31534[14765]::2XTY1-SGFP-V5-preTEV-BLRP-3XFLAG)dFRT	2XTY1-SGFP-V5-preTEV-BLRP-3XFLAG	VK00033
177	03355975781483189 D11	Lsm11	2012-09-07	Vijay Raghavan	FlyFos015986(pRedFlp-Hgr)(Lsm11[18378]::2XTY1-SGFP-V5-preTEV-BLRP-3XFLAG)dFRT	2XTY1-SGFP-V5-preTEV-BLRP-3XFLAG	VK00033
178	6196214900843875 H10	Atx2	2012-09-07	Vijay Raghavan	FlyFos031746(pRedFlp-Hgr)(Atx2[40214]::2XTY1-SGFP-V5-preTEV-BLRP-3XFLAG)dFRT	2XTY1-SGFP-V5-preTEV-BLRP-3XFLAG	VK00033
179	6745694817474591 A07	CG13679	2012-10-04	Vijay Raghavan	FlyFos020594(pRedFlp-Hgr)(CG13679[27851]::2XTY1-SGFP-V5-preTEV-BLRP-3XFLAG)dFRT	2XTY1-SGFP-V5-preTEV-BLRP-3XFLAG	VK00033
180	1582528031925018 H05	Nc	2012-09-11	Frank Schnorrer	FlyFos026978(pRedFlp-Hgr)(Nc[21271]::2XTY1-SGFP-V5-preTEV-BLRP-3XFLAG)dFRT	2XTY1-SGFP-V5-preTEV-BLRP-3XFLAG	VK00033
181	6290259782156287 H08	alpha-Est5	2012-09-11	Frank Schnorrer	FlyFos017010(pRedFlp-Hgr)(alpha-Est5[22536]::2XTY1-SGFP-V5-preTEV-BLRP-3XFLAG)dFRT	2XTY1-SGFP-V5-preTEV-BLRP-3XFLAG	VK00033
182	6290259782156287 C04	vri	2012-09-11	Frank Schnorrer	FlyFos016682(pRedFlp-Hgr)(vri[17169]::2XTY1-SGFP-V5-preTEV-BLRP-3XFLAG)dFRT	2XTY1-SGFP-V5-preTEV-BLRP-3XFLAG	VK00033
185	6745694817474591 C01	CG7357	2012-09-18	Vijay Raghavan	FlyFos019493(pRedFlp-Hgr)(CG7357[21594]::2XTY1-SGFP-V5-preTEV-BLRP-3XFLAG)dFRT	2XTY1-SGFP-V5-preTEV-BLRP-3XFLAG	VK00033
191	6745694817474591 B01	CG17801	2012-09-18	Vijay Raghavan	FlyFos019493(pRedFlp-Hgr)(CG17801[19845]::2XTY1-SGFP-V5-preTEV-BLRP-3XFLAG)dFRT	2XTY1-SGFP-V5-preTEV-BLRP-3XFLAG	VK00033
192	6745694817474591 C03	wdn	2012-10-04	Vijay Raghavan	FlyFos019698(pRedFlp-Hgr)(wdn[36678]::2XTY1-SGFP-V5-preTEV-BLRP-3XFLAG)dFRT	2XTY1-SGFP-V5-preTEV-BLRP-3XFLAG	VK00033
197	6745694817474591 D04	mod	2012-09-18	Vijay Raghavan	FlyFos019847(pRedFlp-Hgr)(mod[30832]::2XTY1-SGFP-V5-preTEV-BLRP-3XFLAG)dFRT	2XTY1-SGFP-V5-preTEV-BLRP-3XFLAG	VK00033
200	6745694817474591 D09	Sox21a	2012-09-18	Vijay Raghavan	FlyFos020951(pRedFlp-Hgr)(Sox21a[37695]::2XTY1-SGFP-V5-preTEV-BLRP-3XFLAG)dFRT	2XTY1-SGFP-V5-preTEV-BLRP-3XFLAG	VK00033
201	6745694817474591 C09	CG16863	2012-09-18	Vijay Raghavan	FlyFos020965(pRedFlp-Hgr)(CG16863[18037]::2XTY1-SGFP-V5-preTEV-BLRP-3XFLAG)dFRT	2XTY1-SGFP-V5-preTEV-BLRP-3XFLAG	VK00033
206	6745694817474591 E05	CG11160	2012-09-18	Vijay Raghavan	FlyFos020135(pRedFlp-Hgr)(CG11160[33283]::2XTY1-SGFP-V5-preTEV-BLRP-3XFLAG)dFRT	2XTY1-SGFP-V5-preTEV-BLRP-3XFLAG	VK00033
207	6745694817474591 A01	CG3838	2012-09-18	Vijay Raghavan	FlyFos019466(pRedFlp-Hgr)(CG3838[35307]::2XTY1-SGFP-V5-preTEV-BLRP-3XFLAG)dFRT	2XTY1-SGFP-V5-preTEV-BLRP-3XFLAG	VK00033
213	6745694817474591 E07	chm	2012-09-18	Vijay Raghavan	FlyFos020772(pRedFlp-Hgr)(chm[18312]::2XTY1-SGFP-V5-preTEV-BLRP-3XFLAG)dFRT	2XTY1-SGFP-V5-preTEV-BLRP-3XFLAG	VK00033
217	6745694817474591 F07	CG9215	2012-09-18	Vijay Raghavan	FlyFos020707(pRedFlp-Hgr)(CG9215[19751]::2XTY1-SGFP-V5-preTEV-BLRP-3XFLAG)dFRT	2XTY1-SGFP-V5-preTEV-BLRP-3XFLAG	VK00033
218	1582528031925018 F04	amos	2012-10-02	Frank Schnorrer	FlyFos026832(pRedFlp-Hgr)(amos[15990]::2XTY1-SGFP-V5-preTEV-BLRP-3XFLAG)dFRT	2XTY1-SGFP-V5-preTEV-BLRP-3XFLAG	VK00033
220	014526891357111271 F02	scrt	2012-10-02	Frank Schnorrer	FlyFos028185(pRedFlp-Hgr)(scrt[21247]::2XTY1-SGFP-V5-preTEV-BLRP-3XFLAG)dFRT	2XTY1-SGFP-V5-preTEV-BLRP-3XFLAG	VK00033
230	6745694817474591 D03	CG11398	2012-10-04	Vijay Raghavan	FlyFos019693(pRedFlp-Hgr)(CG11398[44162]::2XTY1-SGFP-V5-preTEV-BLRP-3XFLAG)dFRT	2XTY1-SGFP-V5-preTEV-BLRP-3XFLAG	VK00033
231	6745694817474591 E08	CG1024	2012-10-04	Vijay Raghavan	FlyFos020788(pRedFlp-Hgr)(CG1024[38131]::2XTY1-SGFP-V5-preTEV-BLRP-3XFLAG)dFRT	2XTY1-SGFP-V5-preTEV-BLRP-3XFLAG	VK00033
232	6745694817474591 F09	tty	2012-10-04	Vijay Raghavan	FlyFos020949(pRedFlp-Hgr)(tty[16928]::2XTY1-SGFP-V5-preTEV-BLRP-3XFLAG)dFRT	2XTY1-SGFP-V5-preTEV-BLRP-3XFLAG	VK00033
234	6745694817474591 C11	CG12942	2012-10-04	Vijay Raghavan	FlyFos021201(pRedFlp-Hgr)(CG12942[34375]::2XTY1-SGFP-V5-preTEV-BLRP-3XFLAG)dFRT	2XTY1-SGFP-V5-preTEV-BLRP-3XFLAG	VK00033
236	6745694817474591 D08	dmrt93B	2012-10-04	Vijay Raghavan	FlyFos020778(pRedFlp-Hgr)(dmrt93B[20217]::2XTY1-SGFP-V5-preTEV-BLRP-3XFLAG)dFRT	2XTY1-SGFP-V5-preTEV-BLRP-3XFLAG	VK00033
238	6745694817474591 G01	CG18011	2012-10-04	Vijay Raghavan	FlyFos019528(pRedFlp-Hgr)(CG18011[24214]::2XTY1-SGFP-V5-preTEV-BLRP-3XFLAG)dFRT	2XTY1-SGFP-V5-preTEV-BLRP-3XFLAG	VK00033
239	6745694817474591 H04	BEAF-32	2012-10-04	Vijay Raghavan	FlyFos020037(pRedFlp-Hgr)(BEAF-32[16805]::2XTY1-SGFP-V5-preTEV-BLRP-3XFLAG)dFRT	2XTY1-SGFP-V5-preTEV-BLRP-3XFLAG	VK00033
240	6745694817474591 H12	bs	2012-10-04	Vijay Raghavan	FlyFos021519(pRedFlp-Hgr)(bs[15865]::2XTY1-SGFP-V5-preTEV-BLRP-3XFLAG)dFRT	2XTY1-SGFP-V5-preTEV-BLRP-3XFLAG	VK00033
245	24648923033663195 A04	crol	2012-10-04	Vijay Raghavan	FlyFos021913(pRedFlp-Hgr)(crol[18166]::2XTY1-SGFP-V5-preTEV-BLRP-3XFLAG)dFRT	2XTY1-SGFP-V5-preTEV-BLRP-3XFLAG	VK00033
251	24648923033663195 A06	CG16899	2012-10-04	Vijay Raghavan	FlyFos022188(pRedFlp-Hgr)(CG16899[13132]::2XTY1-SGFP-V5-preTEV-BLRP-3XFLAG)dFRT	2XTY1-SGFP-V5-preTEV-BLRP-3XFLAG	VK00033
254	24648923033663195 A07	CG15436	2012-10-04	Vijay Raghavan	FlyFos022243(pRedFlp-Hgr)(CG15436[20397]::2XTY1-SGFP-V5-preTEV-BLRP-3XFLAG)dFRT	2XTY1-SGFP-V5-preTEV-BLRP-3XFLAG	VK00033
257	24648923033663195 A08	CG10949	2012-10-04	Vijay Raghavan	FlyFos022432(pRedFlp-Hgr)(CG10949[26182]::2XTY1-SGFP-V5-preTEV-BLRP-3XFLAG)dFRT	2XTY1-SGFP-V5-preTEV-BLRP-3XFLAG	VK00033
262	24648923033663195 B08	CG31835	2012-10-04	Vijay Raghavan	FlyFos022479(pRedFlp-Hgr)(CG31835[23010]::2XTY1-SGFP-V5-preTEV-BLRP-3XFLAG)dFRT	2XTY1-SGFP-V5-preTEV-BLRP-3XFLAG	VK00033
263	24648923033663195 B09	CG13287	2012-10-04	Vijay Raghavan	FlyFos022557(pRedFlp-Hgr)(CG13287[25551]::2XTY1-SGFP-V5-preTEV-BLRP-3XFLAG)dFRT	2XTY1-SGFP-V5-preTEV-BLRP-3XFLAG	VK00033
264	24648923033663195 C05	Dox-A3	2012-10-04	Vijay Raghavan	FlyFos022080(pRedFlp-Hgr)(Dox-A3[31345]::2XTY1-SGFP-V5-preTEV-BLRP-3XFLAG)dFRT	2XTY1-SGFP-V5-preTEV-BLRP-3XFLAG	VK00033
266	24648923033663195 C07	CG13426	2012-10-04	Vijay Raghavan	FlyFos022235(pRedFlp-Hgr)(CG13426[23587]::2XTY1-SGFP-V5-preTEV-BLRP-3XFLAG)dFRT	2XTY1-SGFP-V5-preTEV-BLRP-3XFLAG	VK00033
267	24648923033663195 C09	CG11033	2012-10-04	Vijay Raghavan	FlyFos022532(pRedFlp-Hgr)(CG11033[40980]::2XTY1-SGFP-V5-preTEV-BLRP-3XFLAG)dFRT	2XTY1-SGFP-V5-preTEV-BLRP-3XFLAG	VK00033
268	24648923033663195 D07	CG13300	2012-10-04	Vijay Raghavan	FlyFos022245(pRedFlp-Hgr)(CG13300[22385]::2XTY1-SGFP-V5-preTEV-BLRP-3XFLAG)dFRT	2XTY1-SGFP-V5-preTEV-BLRP-3XFLAG	VK00033
270	24648923033663195 F02	CG33695	2012-10-04	Vijay Raghavan	FlyFos021656(pRedFlp-Hgr)(CG33695[21610]::2XTY1-SGFP-V5-preTEV-BLRP-3XFLAG)dFRT	2XTY1-SGFP-V5-preTEV-BLRP-3XFLAG	VK00033
272	7778023793434855 D02	Spred	2012-10-17	Frank Schnorrer	FlyFos020037(pRedFlp-Hgr)(Spred[27168]::2XTY1-SGFP-V5-preTEV-BLRP-3XFLAG)dFRT	2XTY1-SGFP-V5-preTEV-BLRP-3XFLAG	VK00033
275	7778023793434855 B09	CG18659	2012-10-18	Frank Schnorrer	FlyFos021409(pRedFlp-Hgr)(CG18659[30787]::2XTY1-SGFP-V5-preTEV-BLRP-3XFLAG)dFRT	2XTY1-SGFP-V5-preTEV-BLRP-3XFLAG	VK00033
276	7778023793434855 E04	CG12118	2012-10-18	Frank Schnorrer	FlyFos020486(pRedFlp-Hgr)(CG12118[26169]::2XTY1-SGFP-V5-preTEV-BLRP-3XFLAG)dFRT	2XTY1-SGFP-V5-preTEV-BLRP-3XFLAG	VK00033
278	7778023793434855 B07	qless	2012-10-18	Frank Schnorrer	FlyFos020932(pRedFlp-Hgr)(qless[41557]::2XTY1-SGFP-V5-preTEV-BLRP-3XFLAG)dFRT	2XTY1-SGFP-V5-preTEV-BLRP-3XFLAG	VK00033
280	7778023793434855 B08	Glu-RI	2012-10-18	Frank Schnorrer	FlyFos021053(pRedFlp-Hgr)(Glu-RI[25718]::2XTY1-SGFP-V5-preTEV-BLRP-3XFLAG)dFRT	2XTY1-SGFP-V5-preTEV-BLRP-3XFLAG	VK00033
283	7778023793434855 B05	Mkp3	2012-10-18	Frank Schnorrer	FlyFos020625(pRedFlp-Hgr)(Mkp3[37702]::2XTY1-SGFP-V5-preTEV-BLRP-3XFLAG)dFRT	2XTY1-SGFP-V5-preTEV-BLRP-3XFLAG	VK00033
284	7778023793434855 C04	Gal	2012-10-18	Frank Schnorrer	FlyFos020481(pRedFlp-Hgr)(Gal[16329]::2XTY1-SGFP-V5-preTEV-BLRP-3XFLAG)dFRT	2XTY1-SGFP-V5-preTEV-BLRP-3XFLAG	VK00033
286	7778023793434855 D08	CG9312	2012-11-05	Frank Schnorrer	FlyFos021147(pRedFlp-Hgr)(CG9312[33293]::2XTY1-SGFP-V5-preTEV-BLRP-3XFLAG)dFRT	2XTY1-SGFP-V5-preTEV-BLRP-3XFLAG	VK00033
288	7778023793434855 H08	CG7182	2012-11-05	Frank Schnorrer	FlyFos021394(pRedFlp-Hgr)(CG7182[32405]::2XTY1-SGFP-V5-preTEV-BLRP-3XFLAG)dFRT	2XTY1-SGFP-V5-preTEV-BLRP-3XFLAG	VK00033
289	7778023793434855 F01	CG8435	2012-11-05	Frank Schnorrer	FlyFos019981(pRedFlp-Hgr)(CG8435[37480]::2XTY1-SGFP-V5-preTEV-BLRP-3XFLAG)dFRT	2XTY1-SGFP-V5-preTEV-BLRP-3XFLAG	VK00033
290	7778023793434855 F11	Pp1alpha-96A	2012-11-05	Frank Schnorrer	FlyFos021765(pRedFlp-Hgr)(Pp1alpha-96A[15346]::2XTY1-SGFP-V5-preTEV-BLRP-3XFLAG)dFRT	2XTY1-SGFP-V5-preTEV-BLRP-3XFLAG	VK00033
292	7778023793434855 G09	nAcRbeta-64B	2012-11-05	Frank Schnorrer	FlyFos021495(pRedFlp-Hgr)(nAcRbeta-64B[37124]::2XTY1-SGFP-V5-preTEV-BLRP-3XFLAG)dFRT	2XTY1-SGFP-V5-preTEV-BLRP-3XFLAG	VK00033
294	7778023793434855 H05	alphaPS4	2012-11-05	Frank Schnorrer	FlyFos020708(pRedFlp-Hgr)(alphaPS4[35665]::2XTY1-SGFP-V5-preTEV-BLRP-3XFLAG)dFRT	2XTY1-SGFP-V5-preTEV-BLRP-3XFLAG	VK00033
296	7778023793434855 F05	CG12316	2012-11-05	Frank Schnorrer	FlyFos020649(pRedFlp-Hgr)(CG12316[36459]::2XTY1-SGFP-V5-preTEV-BLRP-3XFLAG)dFRT	2XTY1-SGFP-V5-preTEV-BLRP-3XFLAG	VK00033
297	06656881586833885 C02	CG7045	2012-11-06	Vijay Raghavan	FlyFos025054(pRedFlp-Hgr)(CG7045[27607]::2XTY1-SGFP-V5-preTEV-BLRP-3XFLAG)dFRT	2XTY1-SGFP-V5-preTEV-BLRP-3XFLAG	VK00033
303	5827172721875329 D03	CG10979	2012-11-06	Vijay Raghavan	FlyFos023400(pRedFlp-Hgr)(CG10979[34224]::2XTY1-SGFP-V5-preTEV-BLRP-3XFLAG)dFRT	2XTY1-SGFP-V5-preTEV-BLRP-3XFLAG	VK00033
304	5827172721875329 C01	mip120	2012-11-06	Vijay Raghavan	FlyFos023133(pRedFlp-Hgr)(mip120[29075]::2XTY1-SGFP-V5-preTEV-BLRP-3XFLAG)dFRT	2XTY1-SGFP-V5-preTEV-BLRP-3XFLAG	VK00033
305	5827172721875329 D07	SAK	2012-11-06	Vijay Raghavan	FlyFos023973(pRedFlp-Hgr)(SAK[32946]::2XTY1-SGFP-V5-preTEV-BLRP-3XFLAG)dFRT	2XTY1-SGFP-V5-preTEV-BLRP-3XFLAG	VK00033
307	5827172721875329 B11	CG17359	2012-11-06	Vijay Raghavan	FlyFos024638(pRedFlp-Hgr)(CG17359[39388]::2XTY1-SGFP-V5-preTEV-BLRP-3XFLAG)dFRT	2XTY1-SGFP-V5-preTEV-BLRP-3XFLAG	VK00033
308	5827172721875329 E02	MTF-1	2012-11-06	Vijay Raghavan	FlyFos023303(pRedFlp-Hgr)(MTF-1[17299]::2XTY1-SGFP-V5-preTEV-BLRP-3XFLAG)dFRT	2XTY1-SGFP-V5-preTEV-BLRP-3XFLAG	VK00033
313	5827172721875329 E09	HP1b	2012-11-06	Vijay Raghavan	FlyFos024356(pRedFlp-Hgr)(HP1b[19976]::2XTY1-SGFP-V5-preTEV-BLRP-3XFLAG)dFRT	2XTY1-SGFP-V5-preTEV-BLRP-3XFLAG	VK00033
314	5827172721875329 E10	CG8378	2012-11-06	Vijay Raghavan	FlyFos024497(pRedFlp-Hgr)(CG8378[37366]::2XTY1-SGFP-V5-preTEV-BLRP-3XFLAG)dFRT	2XTY1-SGFP-V5-preTEV-BLRP-3XFLAG	VK00033
317	5827172721875329 D01	CG15730	2012-11-06	Vijay Raghavan	FlyFos023117(pRedFlp-Hgr)(CG15730[16349]::2XTY1-SGFP-V5-preTEV-BLRP-3XFLAG)dFRT	2XTY1-SGFP-V5-preTEV-BLRP-3XFLAG	VK00033
318	5827172721875329 B04	CG7056	2012-11-06	Vijay Raghavan	FlyFos023467(pRedFlp-Hgr)(CG7056[37317]::2XTY1-SGFP-V5-preTEV-BLRP-3XFLAG)dFRT	2XTY1-SGFP-V5-preTEV-BLRP-3XFLAG	VK00033
321	5827172721875329 A06	CG5639	2012-11-06	Vijay Raghavan	FlyFos023700(pRedFlp-Hgr)(CG5639[16978]::2XTY1-SGFP-V5-preTEV-BLRP-3XFLAG)dFRT	2XTY1-SGFP-V5-preTEV-BLRP-3XFLAG	VK00033
322	5827172721875329 A05	CG3407	2012-11-06	Vijay Raghavan	FlyFos023607(pRedFlp-Hgr)(CG3407[20409]::2XTY1-SGFP-V5-preTEV-BLRP-3XFLAG)dFRT	2XTY1-SGFP-V5-preTEV-BLRP-3XFLAG	VK00033
323	5827172721875329 A04	chn	2012-11-06	Vijay Raghavan	FlyFos023517(pRedFlp-Hgr)(chn[27094]::2XTY1-SGFP-V5-preTEV-BLRP-3XFLAG)dFRT	2XTY1-SGFP-V5-preTEV-BLRP-3XFLAG	VK00033
328	5827172721875329 A02	CG8159	2012-11-06	Vijay Raghavan	FlyFos023245(pRedFlp-Hgr)(CG8159[32658]::2XTY1-SGFP-V5-preTEV-BLRP-3XFLAG)dFRT	2XTY1-SGFP-V5-preTEV-BLRP-3XFLAG	VK00033
329	24648923033663195 G12	CG3654	2012-11-06	Vijay Raghavan	FlyFos023027(pRedFlp-Hgr)(CG3654[21626]::2XTY1-SGFP-V5-preTEV-BLRP-3XFLAG)dFRT	2XTY1-SGFP-V5-preTEV-BLRP-3XFLAG	VK00033
333	5827172721875329 A01	Z4	2012-11-06	Vijay Raghavan	FlyFos023014(pRedFlp-Hgr)(Z4[18261]::2XTY1-SGFP-V5-preTEV-BLRP-3XFLAG)dFRT	2XTY1-SGFP-V5-preTEV-BLRP-3XFLAG	VK00033
336	24648923033663195 H08	Fer2	2012-11-06	Vijay Raghavan	FlyFos022529(pRedFlp-Hgr)(Fer2[16092]::2XTY1-SGFP-V5-preTEV-BLRP-3XFLAG)dFRT	2XTY1-SGFP-V5-preTEV-BLRP-3XFLAG	VK00033
339	5827172721875329 B08	Suv4-20	2012-11-06	Vijay Raghavan	FlyFos024186(pRedFlp-Hgr)(Suv4-20[34741]::2XTY1-SGFP-V5-preTEV-BLRP-3XFLAG)dFRT	2XTY1-SGFP-V5-preTEV-BLRP-3XFLAG	VK00033
340	24648923033663195 H05	rib	2012-11-06	Vijay Raghavan	FlyFos022200(pRedFlp-Hgr)(rib[37631]::2XTY1-SGFP-V5-preTEV-BLRP-3XFLAG)dFRT	2XTY1-SGFP-V5-preTEV-BLRP-3XFLAG	VK00033
345	5827172721875329 B07	CG6254	2012-11-06	Vijay Raghavan	FlyFos023881(pRedFlp-Hgr)(CG6254[21799]::2XTY1-SGFP-V5-preTEV-BLRP-3XFLAG)dFRT	2XTY1-SGFP-V5-preTEV-BLRP-3XFLAG	VK00033
346	6745694817474591 F04	CG31751	2012-11-06	Vijay Raghavan	FlyFos019972(pRedFlp-Hgr)(CG31751[16924]::2XTY1-SGFP-V5-preTEV-BLRP-3XFLAG)dFRT	2XTY1-SGFP-V5-preTEV-BLRP-3XFLAG	VK00033
348	24648923033663195 E11	Catsup	2012-11-06	Vijay Raghavan	FlyFos022696(pRedFlp-Hgr)(Catsup[37236]::2XTY1-SGFP-V5-preTEV-BLRP-3XFLAG)dFRT	2XTY1-SGFP-V5-preTEV-BLRP-3XFLAG	VK00033
349	6745694817474591 H01	Spn43Aa	2012-11-06	Vijay Raghavan	FlyFos019510(pRedFlp-Hgr)(Spn43Aa[37436]::2XTY1-SGFP-V5-preTEV-BLRP-3XFLAG)dFRT	2XTY1-SGFP-V5-preTEV-BLRP-3XFLAG	VK00033
351	24648923033663195 B12	Rx	2012-11-06	Vijay Raghavan	FlyFos022969(pRedFlp-Hgr)(Rx[17613]::2XTY1-SGFP-V5-preTEV-BLRP-3XFLAG)dFRT	2XTY1-SGFP-V5-preTEV-BLRP-3XFLAG	VK00033
354	24648923033663195 F03	CG2691	2012-11-06	Vijay Raghavan	FlyFos021772(pRedFlp-Hgr)(CG2691[36670]::2XTY1-SGFP-V5-preTEV-BLRP-3XFLAG)dFRT	2XTY1-SGFP-V5-preTEV-BLRP-3XFLAG	VK00033
355	24648923033663195 F06	neb	2012-11-06	Vijay Raghavan	FlyFos022140(pRedFlp-Hgr)(neb[45129]::2XTY1-SGFP-V5-preTEV-BLRP-3XFLAG)dFRT	2XTY1-SGFP-V5-preTEV-BLRP-3XFLAG	VK00033
356	24648923033663195 C10	D19A	2012-11-06	Vijay Raghavan	FlyFos022775(pRedFlp-Hgr)(D19A[17563]::2XTY1-SGFP-V5-preTEV-BLRP-3XFLAG)dFRT	2XTY1-SGFP-V5-preTEV-BLRP-3XFLAG	VK00033
360	24648923033663195 F10	CG15216	2012-11-06	Vijay Raghavan	FlyFos022732(pRedFlp-Hgr)(CG15216[33419]::2XTY1-SGFP-V5-preTEV-BLRP-3XFLAG)dFRT	2XTY1-SGFP-V5-preTEV-BLRP-3XFLAG	VK00033
361	24648923033663195 G01	GluRIIA	2012-11-06	Vijay Raghavan	FlyFos021558(pRedFlp-Hgr)(GluRIIA[17409]::2XTY1-SGFP-V5-preTEV-BLRP-3XFLAG)dFRT	2XTY1-SGFP-V5-preTEV-BLRP-3XFLAG	VK00033
362	24648923033663195 G10	CG1832	2012-11-06	Vijay Raghavan	FlyFos022732(pRedFlp-Hgr)(CG1832[29849]::2XTY1-SGFP-V5-preTEV-BLRP-3XFLAG)dFRT	2XTY1-SGFP-V5-preTEV-BLRP-3XFLAG	VK00033
365	24648923033663195 F12	CG14250	2012-11-06	Vijay Raghavan	FlyFos022965(pRedFlp-Hgr)(CG14250[26209]::2XTY1-SGFP-V5-preTEV-BLRP-3XFLAG)dFRT	2XTY1-SGFP-V5-preTEV-BLRP-3XFLAG	VK00033
367	24648923033663195 F07	Unr	2012-11-06	Vijay Raghavan	FlyFos022370(pRedFlp-Hgr)(Unr[23700]::2XTY1-SGFP-V5-preTEV-BLRP-3XFLAG)dFRT	2XTY1-SGFP-V5-preTEV-BLRP-3XFLAG	VK00033
368	24648923033663195 F08	corto	2012-11-06	Vijay Raghavan	FlyFos022533(pRedFlp-Hgr)(corto[25456]::2XTY1-SGFP-V5-preTEV-BLRP-3XFLAG)dFRT	2XTY1-SGFP-V5-preTEV-BLRP-3XFLAG	VK00033
371	7144464337096436 E03	sinu	2012-11-15	Frank Schnorrer	FlyFos023819(pRedFlp-Hgr)(sinu[14071]::2XTY1-SGFP-V5-preTEV-BLRP-3XFLAG)dFRT	2XTY1-SGFP-V5-preTEV-BLRP-3XFLAG	VK00033
372	7144464337096436 E04	CG7830	2012-11-15	Frank Schnorrer	FlyFos023995(pRedFlp-Hgr)(CG7830[31835]::2XTY1-SGFP-V5-preTEV-BLRP-3XFLAG)dFRT	2XTY1-SGFP-V5-preTEV-BLRP-3XFLAG	VK00033
373	5827172721875329 D08	CG15611	2012-11-26	Vijay Raghavan	FlyFos024193(pRedFlp-Hgr)(CG15611[26660]::2XTY1-SGFP-V5-preTEV-BLRP-3XFLAG)dFRT	2XTY1-SGFP-V5-preTEV-BLRP-3XFLAG	VK00033
375	06656881586833885 B03	Syn2	2012-11-26	Vijay Raghavan	FlyFos025090(pRedFlp-Hgr)(Syn2[16625]::2XTY1-SGFP-V5-preTEV-BLRP-3XFLAG)dFRT	2XTY1-SGFP-V5-preTEV-BLRP-3XFLAG	VK00033
376	06656881586833885 B06	CG4936	2012-11-26	Vijay Raghavan	FlyFos025549(pRedFlp-Hgr)(CG4936[27523]::2XTY1-SGFP-V5-preTEV-BLRP-3XFLAG)dFRT	2XTY1-SGFP-V5-preTEV-BLRP-3XFLAG	VK00033
377	06656881586833885 D08	CG3075	2012-11-26	Vijay Raghavan	FlyFos025927(pRedFlp-Hgr)(CG3075[21802]::2XTY1-SGFP-V5-preTEV-BLRP-3XFLAG)dFRT	2XTY1-SGFP-V5-preTEV-BLRP-3XFLAG	VK00033
378	06656881586833885 D11	CG2712	2012-11-26	Vijay Raghavan	FlyFos026250(pRedFlp-Hgr)(CG2712[23178]::2XTY1-SGFP-V5-preTEV-BLRP-3XFLAG)dFRT	2XTY1-SGFP-V5-preTEV-BLRP-3XFLAG	VK00033
380	06656881586833885 D10	comr	2012-11-26	Vijay Raghavan	FlyFos026177(pRedFlp-Hgr)(comr[37633]::2XTY1-SGFP-V5-preTEV-BLRP-3XFLAG)dFRT	2XTY1-SGFP-V5-preTEV-BLRP-3XFLAG	VK00033
382	06656881586833885 E02	CG30020	2012-11-26	Vijay Raghavan	FlyFos025036(pRedFlp-Hgr)(CG30020[31094]::2XTY1-SGFP-V5-preTEV-BLRP-3XFLAG)dFRT	2XTY1-SGFP-V5-preTEV-BLRP-3XFLAG	VK00033
386	06656881586833885 E08	CG11122	2012-11-26	Vijay Raghavan	FlyFos026015(pRedFlp-Hgr)(CG11122[19054]::2XTY1-SGFP-V5-preTEV-BLRP-3XFLAG)dFRT	2XTY1-SGFP-V5-preTEV-BLRP-3XFLAG	VK00033
387	06656881586833885 E11	Rbsn	2012-11-26	Vijay Raghavan	FlyFos026296(pRedFlp-Hgr)(Rbsn[37963]::2XTY1-SGFP-V5-preTEV-BLRP-3XFLAG)dFRT	2XTY1-SGFP-V5-preTEV-BLRP-3XFLAG	VK00033
391	06656881586833885 F02	Rbp4	2012-11-26	Vijay Raghavan	FlyFos025029(pRedFlp-Hgr)(Rbp4[38478]::2XTY1-SGFP-V5-preTEV-BLRP-3XFLAG)dFRT	2XTY1-SGFP-V5-preTEV-BLRP-3XFLAG	VK00033
392	06656881586833885 F11	CG6272	2012-11-26	Vijay Raghavan	FlyFos026264(pRedFlp-Hgr)(CG6272[31975]::2XTY1-SGFP-V5-preTEV-BLRP-3XFLAG)dFRT	2XTY1-SGFP-V5-preTEV-BLRP-3XFLAG	VK00033
396	06656881586833885 G05	CG4424	2012-11-26	Vijay Raghavan	FlyFos025549(pRedFlp-Hgr)(CG4424[35080]::2XTY1-SGFP-V5-preTEV-BLRP-3XFLAG)dFRT	2XTY1-SGFP-V5-preTEV-BLRP-3XFLAG	VK00033
398	06656881586833885 H01	tef	2012-11-26	Vijay Raghavan	FlyFos024992(pRedFlp-Hgr)(tef[32693]::2XTY1-SGFP-V5-preTEV-BLRP-3XFLAG)dFRT	2XTY1-SGFP-V5-preTEV-BLRP-3XFLAG	VK00033
399	06656881586833885 H09	NPC1	2012-11-26	Vijay Raghavan	FlyFos026029(pRedFlp-Hgr)(NPC1[37061]::2XTY1-SGFP-V5-preTEV-BLRP-3XFLAG)dFRT	2XTY1-SGFP-V5-preTEV-BLRP-3XFLAG	VK00033
400	1582528031925018 A02	MESR4	2012-11-26	Vijay Raghavan	FlyFos026406(pRedFlp-Hgr)(MESR4[32951]::2XTY1-SGFP-V5-preTEV-BLRP-3XFLAG)dFRT	2XTY1-SGFP-V5-preTEV-BLRP-3XFLAG	VK00033
401	1582528031925018 A07	HGTX	2012-11-26	Vijay Raghavan	FlyFos027280(pRedFlp-Hgr)(HGTX[45325]::2XTY1-SGFP-V5-preTEV-BLRP-3XFLAG)dFRT	2XTY1-SGFP-V5-preTEV-BLRP-3XFLAG	VK00002
403	1582528031925018 C05	Rbf2	2012-11-26	Vijay Raghavan	FlyFos026935(pRedFlp-Hgr)(Rbf2[28045]::2XTY1-SGFP-V5-preTEV-BLRP-3XFLAG)dFRT	2XTY1-SGFP-V5-preTEV-BLRP-3XFLAG	VK00002
405	1582528031925018 C07	CG7331	2012-11-26	Vijay Raghavan	FlyFos027270(pRedFlp-Hgr)(CG7331[21057]::2XTY1-SGFP-V5-preTEV-BLRP-3XFLAG)dFRT	2XTY1-SGFP-V5-preTEV-BLRP-3XFLAG	VK00033
406	1582528031925018 C10	LvpD	2012-11-26	Vijay Raghavan	FlyFos027733(pRedFlp-Hgr)(LvpD[28197]::2XTY1-SGFP-V5-preTEV-BLRP-3XFLAG)dFRT	2XTY1-SGFP-V5-preTEV-BLRP-3XFLAG	VK00033
407	1582528031925018 C12	CG6792	2012-11-26	Vijay Raghavan	FlyFos028027(pRedFlp-Hgr)(CG6792[21401]::2XTY1-SGFP-V5-preTEV-BLRP-3XFLAG)dFRT	2XTY1-SGFP-V5-preTEV-BLRP-3XFLAG	VK00033
408	1582528031925018 E01	onecut	2012-11-26	Vijay Raghavan	FlyFos026408(pRedFlp-Hgr)(onecut[26627]::2XTY1-SGFP-V5-preTEV-BLRP-3XFLAG)dFRT	2XTY1-SGFP-V5-preTEV-BLRP-3XFLAG	VK00033
409	1582528031925018 F05	CG4707	2012-11-26	Vijay Raghavan	FlyFos027010(pRedFlp-Hgr)(CG4707[37654]::2XTY1-SGFP-V5-preTEV-BLRP-3XFLAG)dFRT	2XTY1-SGFP-V5-preTEV-BLRP-3XFLAG	VK00033
414	1582528031925018 G05	CG7963	2012-11-26	Vijay Raghavan	FlyFos027012(pRedFlp-Hgr)(CG7963[29746]::2XTY1-SGFP-V5-preTEV-BLRP-3XFLAG)dFRT	2XTY1-SGFP-V5-preTEV-BLRP-3XFLAG	VK00033
416	1582528031925018 D04	Deaf1	2012-11-26	Vijay Raghavan	FlyFos026820(pRedFlp-Hgr)(Deaf1[33644]::2XTY1-SGFP-V5-preTEV-BLRP-3XFLAG)dFRT	2XTY1-SGFP-V5-preTEV-BLRP-3XFLAG	VK00033
420	014526891357111271 B06	tio	2012-11-26	Vijay Raghavan	FlyFos028886(pRedFlp-Hgr)(tio[23654]::2XTY1-SGFP-V5-preTEV-BLRP-3XFLAG)dFRT	2XTY1-SGFP-V5-preTEV-BLRP-3XFLAG	VK00033
423	014526891357111271 C01	CG17568	2012-11-26	Vijay Raghavan	FlyFos028093(pRedFlp-Hgr)(CG17568[32799]::2XTY1-SGFP-V5-preTEV-BLRP-3XFLAG)dFRT	2XTY1-SGFP-V5-preTEV-BLRP-3XFLAG	VK00033
424	014526891357111271 C03	CG9588	2012-11-26	Vijay Raghavan	FlyFos028212(pRedFlp-Hgr)(CG9588[41184]::2XTY1-SGFP-V5-preTEV-BLRP-3XFLAG)dFRT	2XTY1-SGFP-V5-preTEV-BLRP-3XFLAG	VK00033
425	014526891357111271 C12	CG5669	2012-11-26	Vijay Raghavan	FlyFos029906(pRedFlp-Hgr)(CG5669[38919]::2XTY1-SGFP-V5-preTEV-BLRP-3XFLAG)dFRT	2XTY1-SGFP-V5-preTEV-BLRP-3XFLAG	VK00033
428	014526891357111271 B04	t	2012-11-26	Vijay Raghavan	FlyFos028334(pRedFlp-Hgr)(t[30277]::2XTY1-SGFP-V5-preTEV-BLRP-3XFLAG)dFRT	2XTY1-SGFP-V5-preTEV-BLRP-3XFLAG	VK00033
430	2733665080679012 D04	Spn4	2012-12-04	Frank Schnorrer	FlyFos026216(pRedFlp-Hgr)(Spn4[35054]::2XTY1-SGFP-V5-preTEV-BLRP-3XFLAG)dFRT	2XTY1-SGFP-V5-preTEV-BLRP-3XFLAG	VK00033
431	7144464337096436 F03	Chd3	2012-12-04	Frank Schnorrer	FlyFos023834(pRedFlp-Hgr)(Chd3[34961]::2XTY1-SGFP-V5-preTEV-BLRP-3XFLAG)dFRT	2XTY1-SGFP-V5-preTEV-BLRP-3XFLAG	VK00033
434	2733665080679012 C09	CG6415	2012-12-05	Frank Schnorrer	FlyFos026915(pRedFlp-Hgr)(CG6415[38104]::2XTY1-SGFP-V5-preTEV-BLRP-3XFLAG)dFRT	2XTY1-SGFP-V5-preTEV-BLRP-3XFLAG	VK00033
435	6196214900843875 B05	nerfin-1	2012-12-06	Frank Schnorrer	FlyFos030783(pRedFlp-Hgr)(nerfin-1[29831]::2XTY1-SGFP-V5-preTEV-BLRP-3XFLAG)dFRT	2XTY1-SGFP-V5-preTEV-BLRP-3XFLAG	VK00033
436	7144464337096436 D04	wol	2012-12-06	Frank Schnorrer	FlyFos023995(pRedFlp-Hgr)(wol[37123]::2XTY1-SGFP-V5-preTEV-BLRP-3XFLAG)dFRT	2XTY1-SGFP-V5-preTEV-BLRP-3XFLAG	VK00033
437	2733665080679012 D09	Gr21a	2012-12-07	Frank Schnorrer	FlyFos026925(pRedFlp-Hgr)(Gr21a[26944]::2XTY1-SGFP-V5-preTEV-BLRP-3XFLAG)dFRT	2XTY1-SGFP-V5-preTEV-BLRP-3XFLAG	VK00033
441	4947811465999642 F01	argos	2012-12-07	Frank Schnorrer	FlyFos019469(pRedFlp-Hgr)(argos[19494]::2XTY1-SGFP-V5-preTEV-BLRP-3XFLAG)dFRT	2XTY1-SGFP-V5-preTEV-BLRP-3XFLAG	VK00033
442	6745694817474591 B08	sim	2012-12-07	Frank Schnorrer	FlyFos020853(pRedFlp-Hgr)(sim[27472]::2XTY1-SGFP-V5-preTEV-BLRP-3XFLAG)dFRT	2XTY1-SGFP-V5-preTEV-BLRP-3XFLAG	VK00033
443	6745694817474591 B11	sbb	2012-12-07	Frank Schnorrer	FlyFos021250(pRedFlp-Hgr)(sbb[20479]::2XTY1-SGFP-V5-preTEV-BLRP-3XFLAG)dFRT	2XTY1-SGFP-V5-preTEV-BLRP-3XFLAG	VK00033
444	014526891357111271 A07	babo	2012-12-07	Frank Schnorrer	FlyFos029175(pRedFlp-Hgr)(babo[17017]::2XTY1-SGFP-V5-preTEV-BLRP-3XFLAG)dFRT	2XTY1-SGFP-V5-preTEV-BLRP-3XFLAG	VK00033
445	7778023793434855 F10	dome	2012-12-10	Frank Schnorrer	FlyFos021643(pRedFlp-Hgr)(dome[35194]::2XTY1-SGFP-V5-preTEV-BLRP-3XFLAG)dFRT	2XTY1-SGFP-V5-preTEV-BLRP-3XFLAG	VK00033
446	7144464337096436 C06	CG14891	2012-12-10	Frank Schnorrer	FlyFos024455(pRedFlp-Hgr)(CG14891[30119]::2XTY1-SGFP-V5-preTEV-BLRP-3XFLAG)dFRT	2XTY1-SGFP-V5-preTEV-BLRP-3XFLAG	VK00033
448	7144464337096436 H02	Pdk1	2012-12-11	Frank Schnorrer	FlyFos023761(pRedFlp-Hgr)(Pdk1[33282]::2XTY1-SGFP-V5-preTEV-BLRP-3XFLAG)dFRT	2XTY1-SGFP-V5-preTEV-BLRP-3XFLAG	VK00033
449	7778023793434855 E09	Hml	2012-12-11	Frank Schnorrer	FlyFos021467(pRedFlp-Hgr)(Hml[31680]::2XTY1-SGFP-V5-preTEV-BLRP-3XFLAG)dFRT	2XTY1-SGFP-V5-preTEV-BLRP-3XFLAG	VK00033
451	7144464337096436 A08	pea	2012-12-11	Frank Schnorrer	FlyFos024744(pRedFlp-Hgr)(pea[29064]::2XTY1-SGFP-V5-preTEV-BLRP-3XFLAG)dFRT	2XTY1-SGFP-V5-preTEV-BLRP-3XFLAG	VK00033
453	7778023793434855 E06	l(1)G0230	2012-12-11	Frank Schnorrer	FlyFos020886(pRedFlp-Hgr)(l(1)G0230[37094]::2XTY1-SGFP-V5-preTEV-BLRP-3XFLAG)dFRT	2XTY1-SGFP-V5-preTEV-BLRP-3XFLAG	VK00033
455	7144464337096436 A11	Tim8	2012-12-11	Frank Schnorrer	FlyFos025081(pRedFlp-Hgr)(Tim8[23611]::2XTY1-SGFP-V5-preTEV-BLRP-3XFLAG)dFRT	2XTY1-SGFP-V5-preTEV-BLRP-3XFLAG	VK00033
456	7778023793434855 H07	chico	2012-12-11	Frank Schnorrer	FlyFos021045(pRedFlp-Hgr)(chico[23922]::2XTY1-SGFP-V5-preTEV-BLRP-3XFLAG)dFRT	2XTY1-SGFP-V5-preTEV-BLRP-3XFLAG	VK00033
458	7144464337096436 A06	CG7185	2012-12-12	Frank Schnorrer	FlyFos024408(pRedFlp-Hgr)(CG7185[38575]::2XTY1-SGFP-V5-preTEV-BLRP-3XFLAG)dFRT	2XTY1-SGFP-V5-preTEV-BLRP-3XFLAG	VK00033
460	7778023793434855 H11	CG9547	2012-12-12	Frank Schnorrer	FlyFos021780(pRedFlp-Hgr)(CG9547[21583]::2XTY1-SGFP-V5-preTEV-BLRP-3XFLAG)dFRT	2XTY1-SGFP-V5-preTEV-BLRP-3XFLAG	VK00033
461	7144464337096436 D01	CG6227	2012-12-12	Frank Schnorrer	FlyFos023567(pRedFlp-Hgr)(CG6227[34005]::2XTY1-SGFP-V5-preTEV-BLRP-3XFLAG)dFRT	2XTY1-SGFP-V5-preTEV-BLRP-3XFLAG	VK00033
462	8431894728673938 F06	CG4565	2012-12-13	Frank Schnorrer	FlyFos018383(pRedFlp-Hgr)(CG4565[38679]::2XTY1-SGFP-V5-preTEV-BLRP-3XFLAG)dFRT	2XTY1-SGFP-V5-preTEV-BLRP-3XFLAG	VK00033
463	8431894728673938 F03	CG32667	2012-12-13	Frank Schnorrer	FlyFos017984(pRedFlp-Hgr)(CG32667[27600]::2XTY1-SGFP-V5-preTEV-BLRP-3XFLAG)dFRT	2XTY1-SGFP-V5-preTEV-BLRP-3XFLAG	VK00033
464	8431894728673938 G07	CG8516	2012-12-13	Frank Schnorrer	FlyFos018616(pRedFlp-Hgr)(CG8516[29930]::2XTY1-SGFP-V5-preTEV-BLRP-3XFLAG)dFRT	2XTY1-SGFP-V5-preTEV-BLRP-3XFLAG	VK00033
466	8431894728673938 F10	CG1663	2012-12-13	Frank Schnorrer	FlyFos019111(pRedFlp-Hgr)(CG1663[31294]::2XTY1-SGFP-V5-preTEV-BLRP-3XFLAG)dFRT	2XTY1-SGFP-V5-preTEV-BLRP-3XFLAG	VK00033
467	7778023793434855 E07	fliI	2012-12-13	Frank Schnorrer	FlyFos020949(pRedFlp-Hgr)(fliI[28091]::2XTY1-SGFP-V5-preTEV-BLRP-3XFLAG)dFRT	2XTY1-SGFP-V5-preTEV-BLRP-3XFLAG	VK00033
469	7144464337096436 G09	nito	2012-12-13	Frank Schnorrer	FlyFos024969(pRedFlp-Hgr)(nito[25062]::2XTY1-SGFP-V5-preTEV-BLRP-3XFLAG)dFRT	2XTY1-SGFP-V5-preTEV-BLRP-3XFLAG	VK00033
471	6744927827587379 B02	Mf	2012-12-14	Frank Schnorrer	FlyFos024489(pRedFlp-Hgr)(Mf[36281]::2XTY1-SGFP-V5-preTEV-BLRP-3XFLAG)dFRT	2XTY1-SGFP-V5-preTEV-BLRP-3XFLAG	VK00033
475	6744927827587379 D01	Prm	2012-12-17	Frank Schnorrer	FlyFos031855(pRedFlp-Hgr)(Prm[29005]::2XTY1-SGFP-V5-preTEV-BLRP-3XFLAG)dFRT	2XTY1-SGFP-V5-preTEV-BLRP-3XFLAG	VK00033
478	6744927827587379 D02	Fhos	2012-12-18	Frank Schnorrer	FlyFos028087(pRedFlp-Hgr)(Fhos[12151]::2XTY1-SGFP-V5-preTEV-BLRP-3XFLAG)dFRT	2XTY1-SGFP-V5-preTEV-BLRP-3XFLAG	VK00033
479	8431894728673938 H03	CG15455	2012-12-19	Frank Schnorrer	FlyFos018147(pRedFlp-Hgr)(CG15455[17045]::2XTY1-SGFP-V5-preTEV-BLRP-3XFLAG)dFRT	2XTY1-SGFP-V5-preTEV-BLRP-3XFLAG	VK00033
480	23029740539567312 E11	fng	2013-01-02	Frank Schnorrer	FlyFos030841(pRedFlp-Hgr)(fng[19650]::2XTY1-SGFP-V5-preTEV-BLRP-3XFLAG)dFRT	2XTY1-SGFP-V5-preTEV-BLRP-3XFLAG	VK00033
481	17337204868928058 B04	Mp20	2013-01-02	Frank Schnorrer	FlyFos022449(pRedFlp-Hgr)(Mp20[24167]::2XTY1-SGFP-V5-preTEV-BLRP-3XFLAG)dFRT	2XTY1-SGFP-V5-preTEV-BLRP-3XFLAG	VK00033
482	7098569761308662 F04	htl	2013-01-02	Frank Schnorrer	FlyFos031629(pRedFlp-Hgr)(htl[25828]::2XTY1-SGFP-V5-preTEV-BLRP-3XFLAG)dFRT	2XTY1-SGFP-V5-preTEV-BLRP-3XFLAG	VK00033
483	8921672467940407 B06	Ilk	2013-01-02	Frank Schnorrer	FlyFos018746(pRedFlp-Hgr)(Ilk[19076]::2XTY1-SGFP-V5-preTEV-BLRP-3XFLAG)dFRT	2XTY1-SGFP-V5-preTEV-BLRP-3XFLAG	VK00033
484	7778023793434855 B04	TpnC4	2013-01-02	Frank Schnorrer	FlyFos020476(pRedFlp-Hgr)(TpnC4[38146]::2XTY1-SGFP-V5-preTEV-BLRP-3XFLAG)dFRT	2XTY1-SGFP-V5-preTEV-BLRP-3XFLAG	VK00033
485	1582528031925018 E07	org-1	2013-01-02	Frank Schnorrer	FlyFos027367(pRedFlp-Hgr)(org-1[30474]::2XTY1-SGFP-V5-preTEV-BLRP-3XFLAG)dFRT	2XTY1-SGFP-V5-preTEV-BLRP-3XFLAG	VK00033
486	23029740539567312 D06	mask	2013-01-02	Frank Schnorrer	FlyFos029906(pRedFlp-Hgr)(mask[14659]::2XTY1-SGFP-V5-preTEV-BLRP-3XFLAG)dFRT	2XTY1-SGFP-V5-preTEV-BLRP-3XFLAG	VK00033
487	06656881586833885 A10	gogo	2013-01-07	Frank Schnorrer	FlyFos026082(pRedFlp-Hgr)(gogo[16986]::2XTY1-SGFP-V5-preTEV-BLRP-3XFLAG)dFRT	2XTY1-SGFP-V5-preTEV-BLRP-3XFLAG	VK00033
488	014526891357111271 C02	rho	2013-01-07	Frank Schnorrer	FlyFos028122(pRedFlp-Hgr)(rho[34330]::2XTY1-SGFP-V5-preTEV-BLRP-3XFLAG)dFRT	2XTY1-SGFP-V5-preTEV-BLRP-3XFLAG	VK00033
489	03355975781483189 G07	E(spl)	2013-01-08	Frank Schnorrer	FlyFos015754(pRedFlp-Hgr)(E(spl)[24915]::2XTY1-SGFP-V5-preTEV-BLRP-3XFLAG)dFRT	2XTY1-SGFP-V5-preTEV-BLRP-3XFLAG	VK00033
490	03355975781483189 H10	mid	2013-01-08	Frank Schnorrer	FlyFos015981(pRedFlp-Hgr)(mid[24723]::2XTY1-SGFP-V5-preTEV-BLRP-3XFLAG)dFRT	2XTY1-SGFP-V5-preTEV-BLRP-3XFLAG	VK00033
491	9077719496880051 D11	CG4570	2013-01-11	Frank Schnorrer	FlyFos017644(pRedFlp-Hgr)(CG4570[32275]::2XTY1-SGFP-V5-preTEV-BLRP-3XFLAG)dFRT	2XTY1-SGFP-V5-preTEV-BLRP-3XFLAG	VK00033
492	9077719496880051 C06	eya	2013-01-11	Frank Schnorrer	FlyFos016811(pRedFlp-Hgr)(eya[35747]::2XTY1-SGFP-V5-preTEV-BLRP-3XFLAG)dFRT	2XTY1-SGFP-V5-preTEV-BLRP-3XFLAG	VK00033
493	8431894728673938 G04	CG9895	2013-01-11	Frank Schnorrer	FlyFos018198(pRedFlp-Hgr)(CG9895[35925]::2XTY1-SGFP-V5-preTEV-BLRP-3XFLAG)dFRT	2XTY1-SGFP-V5-preTEV-BLRP-3XFLAG	VK00033
494	8431894728673938 C05	CG14264	2013-01-11	Frank Schnorrer	FlyFos018222(pRedFlp-Hgr)(CG14264[23857]::2XTY1-SGFP-V5-preTEV-BLRP-3XFLAG)dFRT	2XTY1-SGFP-V5-preTEV-BLRP-3XFLAG	VK00033
495	014526891357111271 E08	sas	2013-01-25	Frank Schnorrer	FlyFos029334(pRedFlp-Hgr)(sas[15060]::2XTY1-SGFP-V5-preTEV-BLRP-3XFLAG)dFRT	2XTY1-SGFP-V5-preTEV-BLRP-3XFLAG	VK00033
496	1582528031925018 D08	zen2	2013-01-25	Frank Schnorrer	FlyFos027607(pRedFlp-Hgr)(zen2[32146]::2XTY1-SGFP-V5-preTEV-BLRP-3XFLAG)dFRT	2XTY1-SGFP-V5-preTEV-BLRP-3XFLAG	VK00033
497	014526891357111271 G01	prc	2013-01-28	Frank Schnorrer	FlyFos028051(pRedFlp-Hgr)(prc[16606]::2XTY1-SGFP-V5-preTEV-BLRP-3XFLAG)dFRT	2XTY1-SGFP-V5-preTEV-BLRP-3XFLAG	VK00033
500	6744927827587379 G01	Mhc	2013-02-07	Frank Schnorrer	FlyFos022462(pRedFlp-Hgr)(Mhc[14903]::2XTY1-SGFP-V5-preTEV-BLRP-3XFLAG)dFRT	2XTY1-SGFP-V5-preTEV-BLRP-3XFLAG	VK00033
501	6744927827587379 A02	Mf	2013-02-07	Frank Schnorrer	FlyFos024489(pRedFlp-Hgr)(Mf[31786]::2XTY1-SGFP-V5-preTEV-BLRP-3XFLAG)dFRT	2XTY1-SGFP-V5-preTEV-BLRP-3XFLAG	VK00033
502	6744927827587379 C01	dlg1	2013-02-07	Frank Schnorrer	FlyFos028184(pRedFlp-Hgr)(dlg1[37834]::2XTY1-SGFP-V5-preTEV-BLRP-3XFLAG)dFRT	2XTY1-SGFP-V5-preTEV-BLRP-3XFLAG	VK00033
503	9077719496880051 C02	CG12288	2013-02-11	Frank Schnorrer	FlyFos016317(pRedFlp-Hgr)(CG12288[34130]::2XTY1-SGFP-V5-preTEV-BLRP-3XFLAG)dFRT	2XTY1-SGFP-V5-preTEV-BLRP-3XFLAG	VK00033
505	9077719496880051 C07	CG8214	2013-02-11	Frank Schnorrer	FlyFos016950(pRedFlp-Hgr)(CG8214[32612]::2XTY1-SGFP-V5-preTEV-BLRP-3XFLAG)dFRT	2XTY1-SGFP-V5-preTEV-BLRP-3XFLAG	VK00033
506	1582528031925018 B09	activin-beta	2013-02-11	Frank Schnorrer	FlyFos027590(pRedFlp-Hgr)(activin-beta[34877]::2XTY1-SGFP-V5-preTEV-BLRP-3XFLAG)dFRT	2XTY1-SGFP-V5-preTEV-BLRP-3XFLAG	VK00033
507	03355975781483189 H02	CG17086	2013-02-18	Frank Schnorrer	FlyFos015118(pRedFlp-Hgr)(CG17086[25487]::2XTY1-SGFP-V5-preTEV-BLRP-3XFLAG)dFRT	2XTY1-SGFP-V5-preTEV-BLRP-3XFLAG	VK00033
508	03355975781483189 G12	CG2199	2013-02-18	Frank Schnorrer	FlyFos016141(pRedFlp-Hgr)(CG2199[18924]::2XTY1-SGFP-V5-preTEV-BLRP-3XFLAG)dFRT	2XTY1-SGFP-V5-preTEV-BLRP-3XFLAG	VK00033
509	03355975781483189 C01	alc	2013-02-18	Frank Schnorrer	FlyFos014921(pRedFlp-Hgr)(alc[29782]::2XTY1-SGFP-V5-preTEV-BLRP-3XFLAG)dFRT	2XTY1-SGFP-V5-preTEV-BLRP-3XFLAG	VK00033
510	03355975781483189 H05	CG15011	2013-02-18	Frank Schnorrer	FlyFos015485(pRedFlp-Hgr)(CG15011[25994]::2XTY1-SGFP-V5-preTEV-BLRP-3XFLAG)dFRT	2XTY1-SGFP-V5-preTEV-BLRP-3XFLAG	VK00033
511	8431894728673938 G12	grim	2013-02-18	Frank Schnorrer	FlyFos019384(pRedFlp-Hgr)(grim[17044]::2XTY1-SGFP-V5-preTEV-BLRP-3XFLAG)dFRT	2XTY1-SGFP-V5-preTEV-BLRP-3XFLAG	VK00033
512	03355975781483189 G10	Xbp1	2013-02-18	Frank Schnorrer	FlyFos015973(pRedFlp-Hgr)(Xbp1[38121]::2XTY1-SGFP-V5-preTEV-BLRP-3XFLAG)dFRT	2XTY1-SGFP-V5-preTEV-BLRP-3XFLAG	VK00033
513	03355975781483189 D04	gsb-n	2013-02-18	Frank Schnorrer	FlyFos015278(pRedFlp-Hgr)(gsb-n[36753]::2XTY1-SGFP-V5-preTEV-BLRP-3XFLAG)dFRT	2XTY1-SGFP-V5-preTEV-BLRP-3XFLAG	VK00033
514	03355975781483189 C05	Pink1	2013-02-19	Frank Schnorrer	FlyFos015460(pRedFlp-Hgr)(Pink1[25190]::2XTY1-SGFP-V5-preTEV-BLRP-3XFLAG)dFRT	2XTY1-SGFP-V5-preTEV-BLRP-3XFLAG	VK00033
515	8431894728673938 H10	tinc	2013-02-22	Frank Schnorrer	FlyFos019101(pRedFlp-Hgr)(tinc[19042]::2XTY1-SGFP-V5-preTEV-BLRP-3XFLAG)dFRT	2XTY1-SGFP-V5-preTEV-BLRP-3XFLAG	VK00033
516	23029740539567312 E01	cact	2013-02-25	Frank Schnorrer	FlyFos028949(pRedFlp-Hgr)(cact[20310]::2XTY1-SGFP-V5-preTEV-BLRP-3XFLAG)dFRT	2XTY1-SGFP-V5-preTEV-BLRP-3XFLAG	VK00033
518	5827172721875329 C12	nau	2013-02-25	Frank Schnorrer	FlyFos024880(pRedFlp-Hgr)(nau[32333]::2XTY1-SGFP-V5-preTEV-BLRP-3XFLAG)dFRT	2XTY1-SGFP-V5-preTEV-BLRP-3XFLAG	VK00033
519	17337204868928058 C04	Mhc	2013-02-25	Frank Schnorrer	FlyFos022462(pRedFlp-Hgr)(Mhc[13883]::2XTY1-SGFP-V5-preTEV-BLRP-3XFLAG)dFRT	2XTY1-SGFP-V5-preTEV-BLRP-3XFLAG	VK00033
521	014526891357111271 D03	eyg	2013-02-25	Vijay Raghavan	FlyFos028249(pRedFlp-Hgr)(eyg[27353]::2XTY1-SGFP-V5-preTEV-BLRP-3XFLAG)dFRT	2XTY1-SGFP-V5-preTEV-BLRP-3XFLAG	VK00033
524	014526891357111271 F01	HtrA2	2013-02-25	Vijay Raghavan	FlyFos028127(pRedFlp-Hgr)(HtrA2[34084]::2XTY1-SGFP-V5-preTEV-BLRP-3XFLAG)dFRT	2XTY1-SGFP-V5-preTEV-BLRP-3XFLAG	VK00033
526	6196214900843875 A11	Tsf1	2013-02-25	Vijay Raghavan	FlyFos031749(pRedFlp-Hgr)(Tsf1[18514]::2XTY1-SGFP-V5-preTEV-BLRP-3XFLAG)dFRT	2XTY1-SGFP-V5-preTEV-BLRP-3XFLAG	VK00033
527	6196214900843875 F01	CG9598	2013-02-25	Vijay Raghavan	FlyFos030100(pRedFlp-Hgr)(CG9598[37035]::2XTY1-SGFP-V5-preTEV-BLRP-3XFLAG)dFRT	2XTY1-SGFP-V5-preTEV-BLRP-3XFLAG	VK00033
529	6196214900843875 F03	Hex-A	2013-02-25	Vijay Raghavan	FlyFos030484(pRedFlp-Hgr)(Hex-A[41369]::2XTY1-SGFP-V5-preTEV-BLRP-3XFLAG)dFRT	2XTY1-SGFP-V5-preTEV-BLRP-3XFLAG	VK00033
531	6196214900843875 F05	CG13913	2013-02-25	Vijay Raghavan	FlyFos030735(pRedFlp-Hgr)(CG13913[29392]::2XTY1-SGFP-V5-preTEV-BLRP-3XFLAG)dFRT	2XTY1-SGFP-V5-preTEV-BLRP-3XFLAG	VK00033
533	6196214900843875 F06	Bro	2013-02-25	Vijay Raghavan	FlyFos031054(pRedFlp-Hgr)(Bro[33307]::2XTY1-SGFP-V5-preTEV-BLRP-3XFLAG)dFRT	2XTY1-SGFP-V5-preTEV-BLRP-3XFLAG	VK00033
536	6196214900843875 F08	Camta	2013-02-25	Vijay Raghavan	FlyFos031318(pRedFlp-Hgr)(Camta[18814]::2XTY1-SGFP-V5-preTEV-BLRP-3XFLAG)dFRT	2XTY1-SGFP-V5-preTEV-BLRP-3XFLAG	VK00033
538	6745694817474591 A08	Opbp	2013-02-25	Vijay Raghavan	FlyFos020684(pRedFlp-Hgr)(Opbp[32929]::2XTY1-SGFP-V5-preTEV-BLRP-3XFLAG)dFRT	2XTY1-SGFP-V5-preTEV-BLRP-3XFLAG	VK00033
539	6745694817474591 A10	stwl	2013-02-25	Vijay Raghavan	FlyFos021058(pRedFlp-Hgr)(stwl[18281]::2XTY1-SGFP-V5-preTEV-BLRP-3XFLAG)dFRT	2XTY1-SGFP-V5-preTEV-BLRP-3XFLAG	VK00033
541	6745694817474591 B12	HP1c	2013-02-25	Vijay Raghavan	FlyFos021444(pRedFlp-Hgr)(HP1c[32664]::2XTY1-SGFP-V5-preTEV-BLRP-3XFLAG)dFRT	2XTY1-SGFP-V5-preTEV-BLRP-3XFLAG	VK00033
542	6745694817474591 C05	ind	2013-02-25	Vijay Raghavan	FlyFos020105(pRedFlp-Hgr)(ind[30551]::2XTY1-SGFP-V5-preTEV-BLRP-3XFLAG)dFRT	2XTY1-SGFP-V5-preTEV-BLRP-3XFLAG	VK00002
543	24648923033663195 D09	CG2807	2013-02-25	Vijay Raghavan	FlyFos022514(pRedFlp-Hgr)(CG2807[18754]::2XTY1-SGFP-V5-preTEV-BLRP-3XFLAG)dFRT	2XTY1-SGFP-V5-preTEV-BLRP-3XFLAG	VK00033
544	5827172721875329 D02	maf-S	2013-02-25	Vijay Raghavan	FlyFos023276(pRedFlp-Hgr)(maf-S[36322]::2XTY1-SGFP-V5-preTEV-BLRP-3XFLAG)dFRT	2XTY1-SGFP-V5-preTEV-BLRP-3XFLAG	VK00033
548	5827172721875329 F06	CG14667	2013-02-25	Vijay Raghavan	FlyFos023780(pRedFlp-Hgr)(CG14667[30211]::2XTY1-SGFP-V5-preTEV-BLRP-3XFLAG)dFRT	2XTY1-SGFP-V5-preTEV-BLRP-3XFLAG	VK00002
549	5827172721875329 F09	CG14962	2013-02-25	Vijay Raghavan	FlyFos024347(pRedFlp-Hgr)(CG14962[18451]::2XTY1-SGFP-V5-preTEV-BLRP-3XFLAG)dFRT	2XTY1-SGFP-V5-preTEV-BLRP-3XFLAG	VK00033
550	5827172721875329 F12	E(bx)	2013-02-25	Vijay Raghavan	FlyFos024829(pRedFlp-Hgr)(E(bx)[29890]::2XTY1-SGFP-V5-preTEV-BLRP-3XFLAG)dFRT	2XTY1-SGFP-V5-preTEV-BLRP-3XFLAG	VK00033
551	5827172721875329 G02	CG4360	2013-02-25	Vijay Raghavan	FlyFos023343(pRedFlp-Hgr)(CG4360[35555]::2XTY1-SGFP-V5-preTEV-BLRP-3XFLAG)dFRT	2XTY1-SGFP-V5-preTEV-BLRP-3XFLAG	VK00033
552	06656881586833885 F08	CG11071	2013-02-25	Vijay Raghavan	FlyFos025930(pRedFlp-Hgr)(CG11071[26661]::2XTY1-SGFP-V5-preTEV-BLRP-3XFLAG)dFRT	2XTY1-SGFP-V5-preTEV-BLRP-3XFLAG	VK00033
553	06656881586833885 G06	CG6688	2013-02-25	Vijay Raghavan	FlyFos025692(pRedFlp-Hgr)(CG6688[35107]::2XTY1-SGFP-V5-preTEV-BLRP-3XFLAG)dFRT	2XTY1-SGFP-V5-preTEV-BLRP-3XFLAG	VK00033
554	06656881586833885 H06	CG2202	2013-02-25	Vijay Raghavan	FlyFos025763(pRedFlp-Hgr)(CG2202[22247]::2XTY1-SGFP-V5-preTEV-BLRP-3XFLAG)dFRT	2XTY1-SGFP-V5-preTEV-BLRP-3XFLAG	VK00033
555	06656881586833885 E12	CG10959	2013-02-25	Vijay Raghavan	FlyFos026308(pRedFlp-Hgr)(CG10959[30696]::2XTY1-SGFP-V5-preTEV-BLRP-3XFLAG)dFRT	2XTY1-SGFP-V5-preTEV-BLRP-3XFLAG	VK00033
556	1582528031925018 A10	CG12938	2013-02-25	Vijay Raghavan	FlyFos027657(pRedFlp-Hgr)(CG12938[38296]::2XTY1-SGFP-V5-preTEV-BLRP-3XFLAG)dFRT	2XTY1-SGFP-V5-preTEV-BLRP-3XFLAG	VK00033
557	1582528031925018 D05	CG2774	2013-02-25	Vijay Raghavan	FlyFos026886(pRedFlp-Hgr)(CG2774[25776]::2XTY1-SGFP-V5-preTEV-BLRP-3XFLAG)dFRT	2XTY1-SGFP-V5-preTEV-BLRP-3XFLAG	VK00033
558	1582528031925018 E02	cbt	2013-02-25	Vijay Raghavan	FlyFos026521(pRedFlp-Hgr)(cbt[19129]::2XTY1-SGFP-V5-preTEV-BLRP-3XFLAG)dFRT	2XTY1-SGFP-V5-preTEV-BLRP-3XFLAG	VK00033
561	1582528031925018 H01	CG12370	2013-02-25	Vijay Raghavan	FlyFos026449(pRedFlp-Hgr)(CG12370[33811]::2XTY1-SGFP-V5-preTEV-BLRP-3XFLAG)dFRT	2XTY1-SGFP-V5-preTEV-BLRP-3XFLAG	VK00033
562	6196214900843875 A10	CG9640	2013-02-25	Vijay Raghavan	FlyFos031532(pRedFlp-Hgr)(CG9640[18725]::2XTY1-SGFP-V5-preTEV-BLRP-3XFLAG)dFRT	2XTY1-SGFP-V5-preTEV-BLRP-3XFLAG	VK00033
563	014526891357111271 D12	CG31802	2013-02-25	Vijay Raghavan	FlyFos029925(pRedFlp-Hgr)(CG31802[29794]::2XTY1-SGFP-V5-preTEV-BLRP-3XFLAG)dFRT	2XTY1-SGFP-V5-preTEV-BLRP-3XFLAG	VK00033
564	014526891357111271 E06	CG7099	2013-02-25	Vijay Raghavan	FlyFos028922(pRedFlp-Hgr)(CG7099[39778]::2XTY1-SGFP-V5-preTEV-BLRP-3XFLAG)dFRT	2XTY1-SGFP-V5-preTEV-BLRP-3XFLAG	VK00033
565	1708059145882148 H03	Pabp2	2013-02-25	Frank Schnorrer	FlyFos015248(pRedFlp-Hgr)(Pabp2[21869]::2XTY1-SGFP-V5-preTEV-BLRP-3XFLAG)dFRT	2XTY1-SGFP-V5-preTEV-BLRP-3XFLAG	VK00033
566	17337204868928058 E05	raptor	2013-02-25	Frank Schnorrer	FlyFos022619(pRedFlp-Hgr)(raptor[16724]::2XTY1-SGFP-V5-preTEV-BLRP-3XFLAG)dFRT	2XTY1-SGFP-V5-preTEV-BLRP-3XFLAG	VK00033
567	2733665080679012 B09	robo	2013-02-25	Frank Schnorrer	FlyFos026863(pRedFlp-Hgr)(robo[25942]::2XTY1-SGFP-V5-preTEV-BLRP-3XFLAG)dFRT	2XTY1-SGFP-V5-preTEV-BLRP-3XFLAG	VK00033
568	1582528031925018 H07	Cdc42	2013-02-25	Frank Schnorrer	FlyFos027490(pRedFlp-Hgr)(Cdc42[21374]::2XTY1-SGFP-V5-preTEV-BLRP-3XFLAG)dFRT	2XTY1-SGFP-V5-preTEV-BLRP-3XFLAG	VK00033
569	6744927827587379 D03	Kettin / sls	2013-02-25	Frank Schnorrer	Manual design	2XTY1-SGFP-V5-preTEV-BLRP-3XFLAG	VK00033
570	6744927827587379 C03	Adar	2013-02-26	Frank Schnorrer	Manual design	2XTY1-SGFP-V5-preTEV-BLRP-3XFLAG	VK00033
571	17337204868928058 C03	fz4	2013-02-26	Frank Schnorrer	FlyFos022417(pRedFlp-Hgr)(fz4[38925]::2XTY1-SGFP-V5-preTEV-BLRP-3XFLAG)dFRT	2XTY1-SGFP-V5-preTEV-BLRP-3XFLAG	VK00033
572	2733665080679012 F10	wech	2013-02-27	Frank Schnorrer	FlyFos027036(pRedFlp-Hgr)(wech[35101]::2XTY1-SGFP-V5-preTEV-BLRP-3XFLAG)dFRT	2XTY1-SGFP-V5-preTEV-BLRP-3XFLAG	VK00033
573	9077719496880051 G02	Rbp1	2013-03-01	Frank Schnorrer	FlyFos016339(pRedFlp-Hgr)(Rbp1[31535]::2XTY1-SGFP-V5-preTEV-BLRP-3XFLAG)dFRT	2XTY1-SGFP-V5-preTEV-BLRP-3XFLAG	VK00033
574	6196214900843875 D06	LanA	2013-03-04	Frank Schnorrer	FlyFos030991(pRedFlp-Hgr)(LanA[15434]::2XTY1-SGFP-V5-preTEV-BLRP-3XFLAG)dFRT	2XTY1-SGFP-V5-preTEV-BLRP-3XFLAG	VK00033
576	06656881586833885 B11	Med	2013-03-05	Frank Schnorrer	FlyFos026267(pRedFlp-Hgr)(Med[36118]::2XTY1-SGFP-V5-preTEV-BLRP-3XFLAG)dFRT	2XTY1-SGFP-V5-preTEV-BLRP-3XFLAG	VK00033
577	7098569761308662 H02	vas	2013-03-12	Frank Schnorrer	FlyFos031335(pRedFlp-Hgr)(vas[41728]::2XTY1-SGFP-V5-preTEV-BLRP-3XFLAG)dFRT	2XTY1-SGFP-V5-preTEV-BLRP-3XFLAG	VK00033
578	7144464337096436 B11	hop	2013-03-12	Frank Schnorrer	FlyFos025081(pRedFlp-Hgr)(hop[16551]::2XTY1-SGFP-V5-preTEV-BLRP-3XFLAG)dFRT	2XTY1-SGFP-V5-preTEV-BLRP-3XFLAG	VK00033
579	7778023793434855 G01	Lis-1	2013-03-18	Frank Schnorrer	FlyFos019981(pRedFlp-Hgr)(Lis-1[23477]::2XTY1-SGFP-V5-preTEV-BLRP-3XFLAG)dFRT	2XTY1-SGFP-V5-preTEV-BLRP-3XFLAG	VK00033
581	2733665080679012 H11	aub	2013-03-18	Frank Schnorrer	FlyFos027172(pRedFlp-Hgr)(aub[29941]::2XTY1-SGFP-V5-preTEV-BLRP-3XFLAG)dFRT	2XTY1-SGFP-V5-preTEV-BLRP-3XFLAG	VK00033
582	17337204868928058 B12	kz	2013-03-18	Frank Schnorrer	FlyFos023365(pRedFlp-Hgr)(kz[23116]::2XTY1-SGFP-V5-preTEV-BLRP-3XFLAG)dFRT	2XTY1-SGFP-V5-preTEV-BLRP-3XFLAG	VK00033
583	7144464337096436 C08	Pvr	2013-03-22	Frank Schnorrer	FlyFos024805(pRedFlp-Hgr)(Pvr[39766]::2XTY1-SGFP-V5-preTEV-BLRP-3XFLAG)dFRT	2XTY1-SGFP-V5-preTEV-BLRP-3XFLAG	VK00033
584	6744927827587379 E02	Lmpt	2013-03-22	Frank Schnorrer	FlyFos023546(pRedFlp-Hgr)(Lmpt[11181]::2XTY1-SGFP-V5-preTEV-BLRP-3XFLAG)dFRT	2XTY1-SGFP-V5-preTEV-BLRP-3XFLAG	VK00033
585	6744927827587379 B03	hts	2013-03-22	Frank Schnorrer	FlyFos024943(pRedFlp-Hgr)(hts[37956]::2XTY1-SGFP-V5-preTEV-BLRP-3XFLAG)dFRT	2XTY1-SGFP-V5-preTEV-BLRP-3XFLAG	VK00033
587	6744927827587379 G02	rhea	2013-03-22	Frank Schnorrer	FlyFos026125(pRedFlp-Hgr)(rhea[13361]::2XTY1-SGFP-V5-preTEV-BLRP-3XFLAG)dFRT	2XTY1-SGFP-V5-preTEV-BLRP-3XFLAG	VK00033
588	6744927827587379 E01	CG3964	2013-03-25	Frank Schnorrer	FlyFos018471(pRedFlp-Hgr)(CG3964[32148]::2XTY1-SGFP-V5-preTEV-BLRP-3XFLAG)dFRT	2XTY1-SGFP-V5-preTEV-BLRP-3XFLAG	VK00033
591	6196214900843875 E09	RhoGEF2	2013-04-05	Frank Schnorrer	FlyFos031532(pRedFlp-Hgr)(RhoGEF2[20957]::2XTY1-SGFP-V5-preTEV-BLRP-3XFLAG)dFRT	2XTY1-SGFP-V5-preTEV-BLRP-3XFLAG	VK00033
593	7098569761308662 D06	fz3	2013-04-08	Frank Schnorrer	FlyFos031942(pRedFlp-Hgr)(fz3[33759]::2XTY1-SGFP-V5-preTEV-BLRP-3XFLAG)dFRT	2XTY1-SGFP-V5-preTEV-BLRP-3XFLAG	VK00033
595	9854504803824267 E08	vkg	2013-04-09	Frank Schnorrer	FlyFos028458(pRedFlp-Hgr)(vkg[31370]::2XTY1-SGFP-V5-preTEV-BLRP-3XFLAG)dFRT	2XTY1-SGFP-V5-preTEV-BLRP-3XFLAG	VK00033
596	1708059145882148 F03	Sin3A	2013-04-09	Frank Schnorrer	FlyFos015229(pRedFlp-Hgr)(Sin3A[36106]::2XTY1-SGFP-V5-preTEV-BLRP-3XFLAG)dFRT	2XTY1-SGFP-V5-preTEV-BLRP-3XFLAG	VK00033
597	2733665080679012 C04	Liprin-beta	2013-04-09	Frank Schnorrer	FlyFos026193(pRedFlp-Hgr)(Liprin-beta[22517]::2XTY1-SGFP-V5-preTEV-BLRP-3XFLAG)dFRT	2XTY1-SGFP-V5-preTEV-BLRP-3XFLAG	VK00033
598	1582528031925018 H06	Ephrin	2013-04-09	Frank Schnorrer	FlyFos027264(pRedFlp-Hgr)(Ephrin[23151]::2XTY1-SGFP-V5-preTEV-BLRP-3XFLAG)dFRT	2XTY1-SGFP-V5-preTEV-BLRP-3XFLAG	VK00033
599	8921672467940407 D10	smo	2013-04-09	Frank Schnorrer	FlyFos019482(pRedFlp-Hgr)(smo[29630]::2XTY1-SGFP-V5-preTEV-BLRP-3XFLAG)dFRT	2XTY1-SGFP-V5-preTEV-BLRP-3XFLAG	VK00033
600	6290259782156287 H07	sqh	2013-04-12	Frank Schnorrer	FlyFos017004(pRedFlp-Hgr)(sqh[34020]::2XTY1-SGFP-V5-preTEV-BLRP-3XFLAG)dFRT	2XTY1-SGFP-V5-preTEV-BLRP-3XFLAG	VK00033
601	8921672467940407 E02	Myd88	2013-04-29	Frank Schnorrer	FlyFos018176(pRedFlp-Hgr)(Myd88[17199]::2XTY1-SGFP-V5-preTEV-BLRP-3XFLAG)dFRT	2XTY1-SGFP-V5-preTEV-BLRP-3XFLAG	VK00033
602	8921672467940407 E01	Tango1	2013-04-29	Frank Schnorrer	FlyFos018027(pRedFlp-Hgr)(Tango1[28088]::2XTY1-SGFP-V5-preTEV-BLRP-3XFLAG)dFRT	2XTY1-SGFP-V5-preTEV-BLRP-3XFLAG	VK00033
603	7144464337096436 A10	mge	2013-05-10	Frank Schnorrer	FlyFos025017(pRedFlp-Hgr)(mge[22013]::2XTY1-SGFP-V5-preTEV-BLRP-3XFLAG)dFRT	2XTY1-SGFP-V5-preTEV-BLRP-3XFLAG	VK00033
604	7144464337096436 A04	Ssadh	2013-05-10	Frank Schnorrer	FlyFos023893(pRedFlp-Hgr)(Ssadh[26014]::2XTY1-SGFP-V5-preTEV-BLRP-3XFLAG)dFRT	2XTY1-SGFP-V5-preTEV-BLRP-3XFLAG	VK00033
606	9854504803824267 G07	Syt1	2013-05-20	Vijay Raghavan	FlyFos028343(pRedFlp-Hgr)(Syt1[34146]::2XTY1-SGFP-V5-preTEV-BLRP-3XFLAG)dFRT	2XTY1-SGFP-V5-preTEV-BLRP-3XFLAG	VK00033
608	9077719496880051 C09	casp	2013-05-20	Vijay Raghavan	FlyFos017186(pRedFlp-Hgr)(casp[18411]::2XTY1-SGFP-V5-preTEV-BLRP-3XFLAG)dFRT	2XTY1-SGFP-V5-preTEV-BLRP-3XFLAG	VK00033
611	1708059145882148 G01	beta4GalNAcTA	2013-05-20	Vijay Raghavan	FlyFos015074(pRedFlp-Hgr)(beta4GalNAcTA[19489]::2XTY1-SGFP-V5-preTEV-BLRP-3XFLAG)dFRT	2XTY1-SGFP-V5-preTEV-BLRP-3XFLAG	VK00033
613	1708059145882148 C11	GABA-B-R3	2013-05-20	Vijay Raghavan	FlyFos016078(pRedFlp-Hgr)(GABA-B-R3[39992]::2XTY1-SGFP-V5-preTEV-BLRP-3XFLAG)dFRT	2XTY1-SGFP-V5-preTEV-BLRP-3XFLAG	VK00033
615	7778023793434855 A02	egr	2013-05-20	Vijay Raghavan	FlyFos019988(pRedFlp-Hgr)(egr[23929]::2XTY1-SGFP-V5-preTEV-BLRP-3XFLAG)dFRT	2XTY1-SGFP-V5-preTEV-BLRP-3XFLAG	VK00033
616	1708059145882148 B06	CG10802	2013-05-20	Vijay Raghavan	FlyFos015438(pRedFlp-Hgr)(CG10802[35416]::2XTY1-SGFP-V5-preTEV-BLRP-3XFLAG)dFRT	2XTY1-SGFP-V5-preTEV-BLRP-3XFLAG	VK00033
617	1708059145882148 H08	CG8801	2013-05-20	Vijay Raghavan	FlyFos015759(pRedFlp-Hgr)(CG8801[29093]::2XTY1-SGFP-V5-preTEV-BLRP-3XFLAG)dFRT	2XTY1-SGFP-V5-preTEV-BLRP-3XFLAG	VK00033
620	1708059145882148 F07	CG17834	2013-05-20	Vijay Raghavan	FlyFos015539(pRedFlp-Hgr)(CG17834[29124]::2XTY1-SGFP-V5-preTEV-BLRP-3XFLAG)dFRT	2XTY1-SGFP-V5-preTEV-BLRP-3XFLAG	VK00033
621	1708059145882148 B01	l(2)k16918	2013-05-20	Vijay Raghavan	FlyFos015010(pRedFlp-Hgr)(l(2)k16918[25516]::2XTY1-SGFP-V5-preTEV-BLRP-3XFLAG)dFRT	2XTY1-SGFP-V5-preTEV-BLRP-3XFLAG	VK00033
623	9077719496880051 F02	por	2013-05-20	Vijay Raghavan	FlyFos016336(pRedFlp-Hgr)(por[30235]::2XTY1-SGFP-V5-preTEV-BLRP-3XFLAG)dFRT	2XTY1-SGFP-V5-preTEV-BLRP-3XFLAG	VK00033
624	1708059145882148 B07	l(1)G0004	2013-05-20	Vijay Raghavan	FlyFos015500(pRedFlp-Hgr)(l(1)G0004[19651]::2XTY1-SGFP-V5-preTEV-BLRP-3XFLAG)dFRT	2XTY1-SGFP-V5-preTEV-BLRP-3XFLAG	VK00033
625	1708059145882148 H01	Snp	2013-05-20	Vijay Raghavan	FlyFos015086(pRedFlp-Hgr)(Snp[35924]::2XTY1-SGFP-V5-preTEV-BLRP-3XFLAG)dFRT	2XTY1-SGFP-V5-preTEV-BLRP-3XFLAG	VK00033
628	014526891357111271 C05	CG8119	2013-05-20	Vijay Raghavan	FlyFos028702(pRedFlp-Hgr)(CG8119[21786]::2XTY1-SGFP-V5-preTEV-BLRP-3XFLAG)dFRT	2XTY1-SGFP-V5-preTEV-BLRP-3XFLAG	VK00033
629	1708059145882148 H12	Df31	2013-05-20	Vijay Raghavan	FlyFos016208(pRedFlp-Hgr)(Df31[26240]::2XTY1-SGFP-V5-preTEV-BLRP-3XFLAG)dFRT	2XTY1-SGFP-V5-preTEV-BLRP-3XFLAG	VK00033
630	9854504803824267 B10	Zfrp8	2013-05-20	Vijay Raghavan	FlyFos028603(pRedFlp-Hgr)(Zfrp8[27197]::2XTY1-SGFP-V5-preTEV-BLRP-3XFLAG)dFRT	2XTY1-SGFP-V5-preTEV-BLRP-3XFLAG	VK00033
633	9077719496880051 B02	CG14443	2013-05-20	Vijay Raghavan	FlyFos016293(pRedFlp-Hgr)(CG14443[31640]::2XTY1-SGFP-V5-preTEV-BLRP-3XFLAG)dFRT	2XTY1-SGFP-V5-preTEV-BLRP-3XFLAG	VK00033
634	1708059145882148 B10	CG8839	2013-05-20	Vijay Raghavan	FlyFos015851(pRedFlp-Hgr)(CG8839[31922]::2XTY1-SGFP-V5-preTEV-BLRP-3XFLAG)dFRT	2XTY1-SGFP-V5-preTEV-BLRP-3XFLAG	VK00033
635	23029740539567312 G07	Pdsw	2013-05-20	Vijay Raghavan	FlyFos030147(pRedFlp-Hgr)(Pdsw[32692]::2XTY1-SGFP-V5-preTEV-BLRP-3XFLAG)dFRT	2XTY1-SGFP-V5-preTEV-BLRP-3XFLAG	VK00033
638	8921672467940407 A09	Ndg	2013-05-20	Vijay Raghavan	FlyFos019230(pRedFlp-Hgr)(Ndg[39806]::2XTY1-SGFP-V5-preTEV-BLRP-3XFLAG)dFRT	2XTY1-SGFP-V5-preTEV-BLRP-3XFLAG	VK00033
640	1708059145882148 A11	l(1)G0320	2013-05-20	Vijay Raghavan	FlyFos015978(pRedFlp-Hgr)(l(1)G0320[27976]::2XTY1-SGFP-V5-preTEV-BLRP-3XFLAG)dFRT	2XTY1-SGFP-V5-preTEV-BLRP-3XFLAG	VK00033
641	1708059145882148 E04	CG5347	2013-05-20	Vijay Raghavan	FlyFos015271(pRedFlp-Hgr)(CG5347[30835]::2XTY1-SGFP-V5-preTEV-BLRP-3XFLAG)dFRT	2XTY1-SGFP-V5-preTEV-BLRP-3XFLAG	VK00033
643	1708059145882148 A04	CG8408	2013-05-20	Vijay Raghavan	FlyFos015249(pRedFlp-Hgr)(CG8408[25858]::2XTY1-SGFP-V5-preTEV-BLRP-3XFLAG)dFRT	2XTY1-SGFP-V5-preTEV-BLRP-3XFLAG	VK00033
644	1708059145882148 G02	porin	2013-05-20	Vijay Raghavan	FlyFos015118(pRedFlp-Hgr)(porin[32046]::2XTY1-SGFP-V5-preTEV-BLRP-3XFLAG)dFRT	2XTY1-SGFP-V5-preTEV-BLRP-3XFLAG	VK00033
645	9077719496880051 A09	CG6201	2013-05-20	Vijay Raghavan	FlyFos017123(pRedFlp-Hgr)(CG6201[28331]::2XTY1-SGFP-V5-preTEV-BLRP-3XFLAG)dFRT	2XTY1-SGFP-V5-preTEV-BLRP-3XFLAG	VK00033
651	9077719496880051 D05	l(2)k05819	2013-05-20	Vijay Raghavan	FlyFos016745(pRedFlp-Hgr)(l(2)k05819[26498]::2XTY1-SGFP-V5-preTEV-BLRP-3XFLAG)dFRT	2XTY1-SGFP-V5-preTEV-BLRP-3XFLAG	VK00033
654	1708059145882148 D07	BBS8	2013-05-20	Vijay Raghavan	FlyFos015533(pRedFlp-Hgr)(BBS8[15311]::2XTY1-SGFP-V5-preTEV-BLRP-3XFLAG)dFRT	2XTY1-SGFP-V5-preTEV-BLRP-3XFLAG	VK00033
655	1708059145882148 B04	CG8316	2013-05-20	Vijay Raghavan	FlyFos015249(pRedFlp-Hgr)(CG8316[19491]::2XTY1-SGFP-V5-preTEV-BLRP-3XFLAG)dFRT	2XTY1-SGFP-V5-preTEV-BLRP-3XFLAG	VK00033
656	1708059145882148 E03	pck	2013-05-20	Vijay Raghavan	FlyFos015227(pRedFlp-Hgr)(pck[28170]::2XTY1-SGFP-V5-preTEV-BLRP-3XFLAG)dFRT	2XTY1-SGFP-V5-preTEV-BLRP-3XFLAG	VK00033
657	1708059145882148 E01	CG31935	2013-05-20	Vijay Raghavan	FlyFos015058(pRedFlp-Hgr)(CG31935[41043]::2XTY1-SGFP-V5-preTEV-BLRP-3XFLAG)dFRT	2XTY1-SGFP-V5-preTEV-BLRP-3XFLAG	VK00033
669	9077719496880051 D02	CG1461	2013-05-20	Vijay Raghavan	FlyFos016330(pRedFlp-Hgr)(CG1461[23317]::2XTY1-SGFP-V5-preTEV-BLRP-3XFLAG)dFRT	2XTY1-SGFP-V5-preTEV-BLRP-3XFLAG	VK00033
670	9077719496880051 A07	Nup107	2013-05-20	Vijay Raghavan	FlyFos016926(pRedFlp-Hgr)(Nup107[44257]::2XTY1-SGFP-V5-preTEV-BLRP-3XFLAG)dFRT	2XTY1-SGFP-V5-preTEV-BLRP-3XFLAG	VK00033
671	06656881586833885 E06	CG17361	2013-05-20	Vijay Raghavan	FlyFos025713(pRedFlp-Hgr)(CG17361[18938]::2XTY1-SGFP-V5-preTEV-BLRP-3XFLAG)dFRT	2XTY1-SGFP-V5-preTEV-BLRP-3XFLAG	VK00033
672	1582528031925018 A04	CG4681	2013-05-20	Vijay Raghavan	FlyFos026715(pRedFlp-Hgr)(CG4681[21298]::2XTY1-SGFP-V5-preTEV-BLRP-3XFLAG)dFRT	2XTY1-SGFP-V5-preTEV-BLRP-3XFLAG	VK00033
673	9077719496880051 F03	wgn	2013-05-20	Vijay Raghavan	FlyFos016415(pRedFlp-Hgr)(wgn[38970]::2XTY1-SGFP-V5-preTEV-BLRP-3XFLAG)dFRT	2XTY1-SGFP-V5-preTEV-BLRP-3XFLAG	VK00033
674	9077719496880051 A04	S	2013-05-20	Vijay Raghavan	FlyFos016458(pRedFlp-Hgr)(S[13400]::2XTY1-SGFP-V5-preTEV-BLRP-3XFLAG)dFRT	2XTY1-SGFP-V5-preTEV-BLRP-3XFLAG	VK00033
675	8431894728673938 A02	ecd	2013-05-22	Frank Schnorrer	FlyFos017891(pRedFlp-Hgr)(ecd[30277]::2XTY1-SGFP-V5-preTEV-BLRP-3XFLAG)dFRT	2XTY1-SGFP-V5-preTEV-BLRP-3XFLAG	VK00033
678	9077719496880051 B07	Mlp84B	2013-05-24	Frank Schnorrer	FlyFos016927(pRedFlp-Hgr)(Mlp84B[30536]::2XTY1-SGFP-V5-preTEV-BLRP-3XFLAG)dFRT	2XTY1-SGFP-V5-preTEV-BLRP-3XFLAG	VK00033
679	24648923033663195 A11	mib2	2013-05-27	Frank Schnorrer	FlyFos022696(pRedFlp-Hgr)(mib2[35008]::2XTY1-SGFP-V5-preTEV-BLRP-3XFLAG)dFRT	2XTY1-SGFP-V5-preTEV-BLRP-3XFLAG	VK00033
680	6744927827587379 C02	zormin	2013-05-27	Frank Schnorrer	FlyFos031832(pRedFlp-Hgr)(zormin[38998]::2XTY1-SGFP-V5-preTEV-BLRP-3XFLAG)dFRT	2XTY1-SGFP-V5-preTEV-BLRP-3XFLAG	VK00033
681	23029740539567312 H12	LanB1	2013-05-27	Frank Schnorrer	FlyFos031072(pRedFlp-Hgr)(LanB1[32973]::2XTY1-SGFP-V5-preTEV-BLRP-3XFLAG)dFRT	2XTY1-SGFP-V5-preTEV-BLRP-3XFLAG	VK00033
682	7144464337096436 C05	CG5098	2013-06-07	Frank Schnorrer	FlyFos024265(pRedFlp-Hgr)(CG5098[20100]::2XTY1-SGFP-V5-preTEV-BLRP-3XFLAG)dFRT	2XTY1-SGFP-V5-preTEV-BLRP-3XFLAG	VK00033
684	7144464337096436 D09	ATP7	2013-06-11	Frank Schnorrer	FlyFos024931(pRedFlp-Hgr)(ATP7[33004]::2XTY1-SGFP-V5-preTEV-BLRP-3XFLAG)dFRT	2XTY1-SGFP-V5-preTEV-BLRP-3XFLAG	VK00033
685	7144464337096436 B01	QC	2013-06-11	Frank Schnorrer	FlyFos023508(pRedFlp-Hgr)(QC[25122]::2XTY1-SGFP-V5-preTEV-BLRP-3XFLAG)dFRT	2XTY1-SGFP-V5-preTEV-BLRP-3XFLAG	VK00033
686	7144464337096436 B08	asp	2013-06-11	Frank Schnorrer	FlyFos024766(pRedFlp-Hgr)(asp[24519]::2XTY1-SGFP-V5-preTEV-BLRP-3XFLAG)dFRT	2XTY1-SGFP-V5-preTEV-BLRP-3XFLAG	VK00033
687	7144464337096436 C09	Sobp	2013-06-12	Frank Schnorrer	FlyFos024902(pRedFlp-Hgr)(Sobp[24529]::2XTY1-SGFP-V5-preTEV-BLRP-3XFLAG)dFRT	2XTY1-SGFP-V5-preTEV-BLRP-3XFLAG	VK00033
688	7144464337096436 D10	Hrb87F	2013-06-14	Frank Schnorrer	FlyFos025029(pRedFlp-Hgr)(Hrb87F[34705]::2XTY1-SGFP-V5-preTEV-BLRP-3XFLAG)dFRT	2XTY1-SGFP-V5-preTEV-BLRP-3XFLAG	VK00033
689	7144464337096436 D11	pex2	2013-06-14	Frank Schnorrer	FlyFos025180(pRedFlp-Hgr)(pex2[25962]::2XTY1-SGFP-V5-preTEV-BLRP-3XFLAG)dFRT	2XTY1-SGFP-V5-preTEV-BLRP-3XFLAG	VK00033
691	7144464337096436 E08	CG8768	2013-06-14	Frank Schnorrer	FlyFos024844(pRedFlp-Hgr)(CG8768[24375]::2XTY1-SGFP-V5-preTEV-BLRP-3XFLAG)dFRT	2XTY1-SGFP-V5-preTEV-BLRP-3XFLAG	VK00033
692	7144464337096436 E10	CG11919	2013-06-14	Frank Schnorrer	FlyFos025036(pRedFlp-Hgr)(CG11919[21651]::2XTY1-SGFP-V5-preTEV-BLRP-3XFLAG)dFRT	2XTY1-SGFP-V5-preTEV-BLRP-3XFLAG	VK00033
693	7144464337096436 E06	Pka-R1	2013-06-18	Frank Schnorrer	FlyFos024477(pRedFlp-Hgr)(Pka-R1[37825]::2XTY1-SGFP-V5-preTEV-BLRP-3XFLAG)dFRT	2XTY1-SGFP-V5-preTEV-BLRP-3XFLAG	VK00033
694	7144464337096436 E02	Mct1	2013-06-18	Frank Schnorrer	FlyFos023709(pRedFlp-Hgr)(Mct1[34724]::2XTY1-SGFP-V5-preTEV-BLRP-3XFLAG)dFRT	2XTY1-SGFP-V5-preTEV-BLRP-3XFLAG	VK00033
697	7144464337096436 D02	KH1	2013-06-24	Frank Schnorrer	FlyFos023694(pRedFlp-Hgr)(KH1[16670]::2XTY1-SGFP-V5-preTEV-BLRP-3XFLAG)dFRT	2XTY1-SGFP-V5-preTEV-BLRP-3XFLAG	VK00033
698	9077719496880051 A05	betaInt-nu	2013-06-24	Frank Schnorrer	FlyFos016696(pRedFlp-Hgr)(betaInt-nu[32916]::2XTY1-SGFP-V5-preTEV-BLRP-3XFLAG)dFRT	2XTY1-SGFP-V5-preTEV-BLRP-3XFLAG	VK00033
699	9854504803824267 F04	Tango11	2013-06-25	Frank Schnorrer	FlyFos027909(pRedFlp-Hgr)(Tango11[21586]::2XTY1-SGFP-V5-preTEV-BLRP-3XFLAG)dFRT	2XTY1-SGFP-V5-preTEV-BLRP-3XFLAG	VK00033
700	9077719496880051 A08	nos	2013-06-25	Frank Schnorrer	FlyFos017035(pRedFlp-Hgr)(nos[18565]::2XTY1-SGFP-V5-preTEV-BLRP-3XFLAG)dFRT	2XTY1-SGFP-V5-preTEV-BLRP-3XFLAG	VK00033
701	7144464337096436 A09	CG14882	2013-06-25	Frank Schnorrer	FlyFos024895(pRedFlp-Hgr)(CG14882[19808]::2XTY1-SGFP-V5-preTEV-BLRP-3XFLAG)dFRT	2XTY1-SGFP-V5-preTEV-BLRP-3XFLAG	VK00033
703	6744927827587379 F02	Lmpt	2013-07-09	Frank Schnorrer	FlyFos023546(pRedFlp-Hgr)(Lmpt[26033]::2XTY1-SGFP-V5-preTEV-BLRP-3XFLAG)dFRT	2XTY1-SGFP-V5-preTEV-BLRP-3XFLAG	VK00033
704	23029740539567312 G01	abs	2013-07-10	Frank Schnorrer	FlyFos029015(pRedFlp-Hgr)(abs[27575]::2XTY1-SGFP-V5-preTEV-BLRP-3XFLAG)dFRT	2XTY1-SGFP-V5-preTEV-BLRP-3XFLAG	VK00033
705	6745694817474591 B04	WASp	2013-07-11	Frank Schnorrer	FlyFos019867(pRedFlp-Hgr)(WASp[20407]::2XTY1-SGFP-V5-preTEV-BLRP-3XFLAG)dFRT	2XTY1-SGFP-V5-preTEV-BLRP-3XFLAG	VK00033
706	24648923033663195 H01	lgs	2013-07-11	Frank Schnorrer	FlyFos021574(pRedFlp-Hgr)(lgs[25811]::2XTY1-SGFP-V5-preTEV-BLRP-3XFLAG)dFRT	2XTY1-SGFP-V5-preTEV-BLRP-3XFLAG	VK00033
707	7144464337096436 D03	CG10625	2013-07-16	Frank Schnorrer	FlyFos023819(pRedFlp-Hgr)(CG10625[34377]::2XTY1-SGFP-V5-preTEV-BLRP-3XFLAG)dFRT	2XTY1-SGFP-V5-preTEV-BLRP-3XFLAG	VK00033
709	6744927827587379 F03	Mlp60A	2013-07-17	Frank Schnorrer	Manual design	2XTY1-SGFP-V5-preTEV-BLRP-3XFLAG	VK00033
713	6745694817474591 B07	Tor	2013-07-17	Frank Schnorrer	FlyFos020668(pRedFlp-Hgr)(Tor[29074]::2XTY1-SGFP-V5-preTEV-BLRP-3XFLAG)dFRT	2XTY1-SGFP-V5-preTEV-BLRP-3XFLAG	VK00033
714	1708059145882148 E05	Sos	2013-07-18	Frank Schnorrer	FlyFos015364(pRedFlp-Hgr)(Sos[32330]::2XTY1-SGFP-V5-preTEV-BLRP-3XFLAG)dFRT	2XTY1-SGFP-V5-preTEV-BLRP-3XFLAG	VK00033
715	8431894728673938 C09	CG34380	2013-07-19	Frank Schnorrer	FlyFos018828(pRedFlp-Hgr)(CG34380[15758]::2XTY1-SGFP-V5-preTEV-BLRP-3XFLAG)dFRT	2XTY1-SGFP-V5-preTEV-BLRP-3XFLAG	VK00033
716	7144464337096436 A02	dock	2013-08-05	Frank Schnorrer	FlyFos023592(pRedFlp-Hgr)(dock[41307]::2XTY1-SGFP-V5-preTEV-BLRP-3XFLAG)dFRT	2XTY1-SGFP-V5-preTEV-BLRP-3XFLAG	VK00033
717	7144464337096436 A03	CG6153	2013-08-05	Frank Schnorrer	FlyFos023767(pRedFlp-Hgr)(CG6153[23534]::2XTY1-SGFP-V5-preTEV-BLRP-3XFLAG)dFRT	2XTY1-SGFP-V5-preTEV-BLRP-3XFLAG	VK00033
718	2733665080679012 F04	Smn	2013-08-06	Frank Schnorrer	FlyFos026251(pRedFlp-Hgr)(Smn[39473]::2XTY1-SGFP-V5-preTEV-BLRP-3XFLAG)dFRT	2XTY1-SGFP-V5-preTEV-BLRP-3XFLAG	VK00033
719	7144464337096436 G01	Wnk	2013-08-07	Frank Schnorrer	FlyFos023572(pRedFlp-Hgr)(Wnk[27858]::2XTY1-SGFP-V5-preTEV-BLRP-3XFLAG)dFRT	2XTY1-SGFP-V5-preTEV-BLRP-3XFLAG	VK00033
720	8921672467940407 F10	rictor	2013-08-08	Frank Schnorrer	FlyFos019506(pRedFlp-Hgr)(rictor[35601]::2XTY1-SGFP-V5-preTEV-BLRP-3XFLAG)dFRT	2XTY1-SGFP-V5-preTEV-BLRP-3XFLAG	VK00033
721	1708059145882148 C12	Tango4	2013-08-08	Frank Schnorrer	FlyFos016131(pRedFlp-Hgr)(Tango4[27427]::2XTY1-SGFP-V5-preTEV-BLRP-3XFLAG)dFRT	2XTY1-SGFP-V5-preTEV-BLRP-3XFLAG	VK00033
722	7144464337096436 G05	smg	2013-08-09	Frank Schnorrer	FlyFos024373(pRedFlp-Hgr)(smg[21852]::2XTY1-SGFP-V5-preTEV-BLRP-3XFLAG)dFRT	2XTY1-SGFP-V5-preTEV-BLRP-3XFLAG	VK00033
723	7144464337096436 G08	CG10445	2013-08-09	Frank Schnorrer	FlyFos024865(pRedFlp-Hgr)(CG10445[17649]::2XTY1-SGFP-V5-preTEV-BLRP-3XFLAG)dFRT	2XTY1-SGFP-V5-preTEV-BLRP-3XFLAG	VK00033
724	7144464337096436 H01	rab3-GAP	2013-08-09	Frank Schnorrer	FlyFos023577(pRedFlp-Hgr)(rab3-GAP[29093]::2XTY1-SGFP-V5-preTEV-BLRP-3XFLAG)dFRT	2XTY1-SGFP-V5-preTEV-BLRP-3XFLAG	VK00033
725	7144464337096436 H03	kar	2013-08-09	Frank Schnorrer	FlyFos023855(pRedFlp-Hgr)(kar[15148]::2XTY1-SGFP-V5-preTEV-BLRP-3XFLAG)dFRT	2XTY1-SGFP-V5-preTEV-BLRP-3XFLAG	VK00033
726	7144464337096436 H05	CG18347	2013-08-09	Frank Schnorrer	FlyFos024400(pRedFlp-Hgr)(CG18347[35197]::2XTY1-SGFP-V5-preTEV-BLRP-3XFLAG)dFRT	2XTY1-SGFP-V5-preTEV-BLRP-3XFLAG	VK00033
727	7144464337096436 H06	x16	2013-08-12	Frank Schnorrer	FlyFos024565(pRedFlp-Hgr)(x16[17980]::2XTY1-SGFP-V5-preTEV-BLRP-3XFLAG)dFRT	2XTY1-SGFP-V5-preTEV-BLRP-3XFLAG	VK00033
728	7144464337096436 G10	CG5023	2013-08-12	Frank Schnorrer	FlyFos025049(pRedFlp-Hgr)(CG5023[25573]::2XTY1-SGFP-V5-preTEV-BLRP-3XFLAG)dFRT	2XTY1-SGFP-V5-preTEV-BLRP-3XFLAG	VK00033
729	7144464337096436 E09	CG11055	2013-08-12	Frank Schnorrer	FlyFos024936(pRedFlp-Hgr)(CG11055[29136]::2XTY1-SGFP-V5-preTEV-BLRP-3XFLAG)dFRT	2XTY1-SGFP-V5-preTEV-BLRP-3XFLAG	VK00033
731	6744927827587379 H02	rhea	2013-08-14	Frank Schnorrer	FlyFos026125(pRedFlp-Hgr)(rhea[16716]::2XTY1-SGFP-V5-preTEV-BLRP-3XFLAG)dFRT	2XTY1-SGFP-V5-preTEV-BLRP-3XFLAG	VK00033
732	7144464337096436 B03	mus301	2013-08-16	Frank Schnorrer	FlyFos023777(pRedFlp-Hgr)(mus301[23507]::2XTY1-SGFP-V5-preTEV-BLRP-3XFLAG)dFRT	2XTY1-SGFP-V5-preTEV-BLRP-3XFLAG	VK00033
733	7144464337096436 C01	eIF5	2013-08-16	Frank Schnorrer	FlyFos023513(pRedFlp-Hgr)(eIF5[28899]::2XTY1-SGFP-V5-preTEV-BLRP-3XFLAG)dFRT	2XTY1-SGFP-V5-preTEV-BLRP-3XFLAG	VK00033
734	7144464337096436 G03	Su(fu)	2013-08-19	Frank Schnorrer	FlyFos023855(pRedFlp-Hgr)(Su(fu)[22672]::2XTY1-SGFP-V5-preTEV-BLRP-3XFLAG)dFRT	2XTY1-SGFP-V5-preTEV-BLRP-3XFLAG	VK00033
735	7144464337096436 F05	BtbVII	2013-08-19	Frank Schnorrer	FlyFos024347(pRedFlp-Hgr)(BtbVII[28832]::2XTY1-SGFP-V5-preTEV-BLRP-3XFLAG)dFRT	2XTY1-SGFP-V5-preTEV-BLRP-3XFLAG	VK00033
736	7144464337096436 D08	CG1340	2013-08-27	Frank Schnorrer	FlyFos024807(pRedFlp-Hgr)(CG1340[28458]::2XTY1-SGFP-V5-preTEV-BLRP-3XFLAG)dFRT	2XTY1-SGFP-V5-preTEV-BLRP-3XFLAG	VK00033
737	7144464337096436 F06	SF2	2013-08-28	Frank Schnorrer	FlyFos024479(pRedFlp-Hgr)(SF2[37036]::2XTY1-SGFP-V5-preTEV-BLRP-3XFLAG)dFRT	2XTY1-SGFP-V5-preTEV-BLRP-3XFLAG	VK00033
738	7144464337096436 F11	usnp	2013-08-28	Frank Schnorrer	FlyFos025226(pRedFlp-Hgr)(usnp[31510]::2XTY1-SGFP-V5-preTEV-BLRP-3XFLAG)dFRT	2XTY1-SGFP-V5-preTEV-BLRP-3XFLAG	VK00033
739	7144464337096436 F09	RhoGEF4	2013-09-02	Frank Schnorrer	FlyFos024947(pRedFlp-Hgr)(RhoGEF4[36256]::2XTY1-SGFP-V5-preTEV-BLRP-3XFLAG)dFRT	2XTY1-SGFP-V5-preTEV-BLRP-3XFLAG	VK00033
741	8921672467940407 A02	CG13231	2013-09-04	Vijay Raghavan	FlyFos018127(pRedFlp-Hgr)(CG13231[35308]::2XTY1-SGFP-V5-preTEV-BLRP-3XFLAG)dFRT	2XTY1-SGFP-V5-preTEV-BLRP-3XFLAG	VK00033
742	9077719496880051 D04	bsf	2013-09-04	Vijay Raghavan	FlyFos016525(pRedFlp-Hgr)(bsf[19901]::2XTY1-SGFP-V5-preTEV-BLRP-3XFLAG)dFRT	2XTY1-SGFP-V5-preTEV-BLRP-3XFLAG	VK00033
745	8921672467940407 A03	CG9961	2013-09-04	Vijay Raghavan	FlyFos018206(pRedFlp-Hgr)(CG9961[30307]::2XTY1-SGFP-V5-preTEV-BLRP-3XFLAG)dFRT	2XTY1-SGFP-V5-preTEV-BLRP-3XFLAG	VK00033
747	9077719496880051 G08	U2af38	2013-09-04	Vijay Raghavan	FlyFos017110(pRedFlp-Hgr)(U2af38[28969]::2XTY1-SGFP-V5-preTEV-BLRP-3XFLAG)dFRT	2XTY1-SGFP-V5-preTEV-BLRP-3XFLAG	VK00033
749	9077719496880051 F09	Ntl	2013-09-04	Vijay Raghavan	FlyFos017359(pRedFlp-Hgr)(Ntl[30247]::2XTY1-SGFP-V5-preTEV-BLRP-3XFLAG)dFRT	2XTY1-SGFP-V5-preTEV-BLRP-3XFLAG	VK00033
754	9077719496880051 F10	Srp54	2013-09-04	Vijay Raghavan	FlyFos017612(pRedFlp-Hgr)(Srp54[21676]::2XTY1-SGFP-V5-preTEV-BLRP-3XFLAG)dFRT	2XTY1-SGFP-V5-preTEV-BLRP-3XFLAG	VK00033
755	9077719496880051 G03	Unc-76	2013-09-04	Vijay Raghavan	FlyFos016428(pRedFlp-Hgr)(Unc-76[13328]::2XTY1-SGFP-V5-preTEV-BLRP-3XFLAG)dFRT	2XTY1-SGFP-V5-preTEV-BLRP-3XFLAG	VK00033
757	9077719496880051 C04	Gr63a	2013-09-04	Vijay Raghavan	FlyFos016517(pRedFlp-Hgr)(Gr63a[27346]::2XTY1-SGFP-V5-preTEV-BLRP-3XFLAG)dFRT	2XTY1-SGFP-V5-preTEV-BLRP-3XFLAG	VK00002
759	1708059145882148 E07	Orco	2013-09-04	Vijay Raghavan	FlyFos015536(pRedFlp-Hgr)(Orco[30913]::2XTY1-SGFP-V5-preTEV-BLRP-3XFLAG)dFRT	2XTY1-SGFP-V5-preTEV-BLRP-3XFLAG	VK00002
761	23029740539567312 B01	Hph	2013-09-04	Vijay Raghavan	FlyFos028936(pRedFlp-Hgr)(Hph[21664]::2XTY1-SGFP-V5-preTEV-BLRP-3XFLAG)dFRT	2XTY1-SGFP-V5-preTEV-BLRP-3XFLAG	VK00002
763	9077719496880051 B11	Nup98-96	2013-09-04	Vijay Raghavan	FlyFos017623(pRedFlp-Hgr)(Nup98-96[28550]::2XTY1-SGFP-V5-preTEV-BLRP-3XFLAG)dFRT	2XTY1-SGFP-V5-preTEV-BLRP-3XFLAG	VK00002
765	7098569761308662 B01	GABA-B-R2	2013-09-04	Vijay Raghavan	FlyFos031073(pRedFlp-Hgr)(GABA-B-R2[33543]::2XTY1-SGFP-V5-preTEV-BLRP-3XFLAG)dFRT	2XTY1-SGFP-V5-preTEV-BLRP-3XFLAG	VK00002
769	1708059145882148 F11	Cha	2013-09-04	Vijay Raghavan	FlyFos016098(pRedFlp-Hgr)(Cha[38665]::2XTY1-SGFP-V5-preTEV-BLRP-3XFLAG)dFRT	2XTY1-SGFP-V5-preTEV-BLRP-3XFLAG	VK00002
781	23029740539567312 H11	AR-2	2013-09-04	Vijay Raghavan	FlyFos030938(pRedFlp-Hgr)(AR-2[22895]::2XTY1-SGFP-V5-preTEV-BLRP-3XFLAG)dFRT	2XTY1-SGFP-V5-preTEV-BLRP-3XFLAG	VK00002
783	8921672467940407 C12	CG11403	2013-09-04	Vijay Raghavan	FlyFos019693(pRedFlp-Hgr)(CG11403[21026]::2XTY1-SGFP-V5-preTEV-BLRP-3XFLAG)dFRT	2XTY1-SGFP-V5-preTEV-BLRP-3XFLAG	VK00002
785	1708059145882148 A06	M6	2013-09-04	Vijay Raghavan	FlyFos015430(pRedFlp-Hgr)(M6[30664]::2XTY1-SGFP-V5-preTEV-BLRP-3XFLAG)dFRT	2XTY1-SGFP-V5-preTEV-BLRP-3XFLAG	VK00002
787	1708059145882148 A10	Kap-alpha3	2013-09-04	Vijay Raghavan	FlyFos015846(pRedFlp-Hgr)(Kap-alpha3[26996]::2XTY1-SGFP-V5-preTEV-BLRP-3XFLAG)dFRT	2XTY1-SGFP-V5-preTEV-BLRP-3XFLAG	VK00002
789	1708059145882148 A09	CG4769	2013-09-04	Vijay Raghavan	FlyFos015765(pRedFlp-Hgr)(CG4769[23745]::2XTY1-SGFP-V5-preTEV-BLRP-3XFLAG)dFRT	2XTY1-SGFP-V5-preTEV-BLRP-3XFLAG	VK00002
791	1708059145882148 B05	CG7804	2013-09-04	Vijay Raghavan	FlyFos015294(pRedFlp-Hgr)(CG7804[31457]::2XTY1-SGFP-V5-preTEV-BLRP-3XFLAG)dFRT	2XTY1-SGFP-V5-preTEV-BLRP-3XFLAG	VK00002
793	1708059145882148 B08	CG7903	2013-09-04	Vijay Raghavan	FlyFos015635(pRedFlp-Hgr)(CG7903[38777]::2XTY1-SGFP-V5-preTEV-BLRP-3XFLAG)dFRT	2XTY1-SGFP-V5-preTEV-BLRP-3XFLAG	VK00002
795	1708059145882148 C03	betaTub85D	2013-09-04	Vijay Raghavan	FlyFos015185(pRedFlp-Hgr)(betaTub85D[21140]::2XTY1-SGFP-V5-preTEV-BLRP-3XFLAG)dFRT	2XTY1-SGFP-V5-preTEV-BLRP-3XFLAG	VK00002
798	1708059145882148 C09	Grd	2013-09-04	Vijay Raghavan	FlyFos015776(pRedFlp-Hgr)(Grd[39047]::2XTY1-SGFP-V5-preTEV-BLRP-3XFLAG)dFRT	2XTY1-SGFP-V5-preTEV-BLRP-3XFLAG	VK00002
800	1708059145882148 D06	Paip2	2013-09-04	Vijay Raghavan	FlyFos015459(pRedFlp-Hgr)(Paip2[32757]::2XTY1-SGFP-V5-preTEV-BLRP-3XFLAG)dFRT	2XTY1-SGFP-V5-preTEV-BLRP-3XFLAG	VK00002
804	9854504803824267 C01	CG7433	2013-09-04	Vijay Raghavan	FlyFos027406(pRedFlp-Hgr)(CG7433[22782]::2XTY1-SGFP-V5-preTEV-BLRP-3XFLAG)dFRT	2XTY1-SGFP-V5-preTEV-BLRP-3XFLAG	VK00002
806	9854504803824267 C08	Apc2	2013-09-04	Vijay Raghavan	FlyFos028456(pRedFlp-Hgr)(Apc2[24638]::2XTY1-SGFP-V5-preTEV-BLRP-3XFLAG)dFRT	2XTY1-SGFP-V5-preTEV-BLRP-3XFLAG	VK00002
808	1708059145882148 H09	Moca-cyp	2013-09-04	Vijay Raghavan	FlyFos015834(pRedFlp-Hgr)(Moca-cyp[17217]::2XTY1-SGFP-V5-preTEV-BLRP-3XFLAG)dFRT	2XTY1-SGFP-V5-preTEV-BLRP-3XFLAG	VK00002
810	9854504803824267 C03	Nmdar1	2013-09-04	Vijay Raghavan	FlyFos027646(pRedFlp-Hgr)(Nmdar1[13701]::2XTY1-SGFP-V5-preTEV-BLRP-3XFLAG)dFRT	2XTY1-SGFP-V5-preTEV-BLRP-3XFLAG	VK00002
812	1708059145882148 H07	CG7394	2013-09-04	Vijay Raghavan	FlyFos015608(pRedFlp-Hgr)(CG7394[31783]::2XTY1-SGFP-V5-preTEV-BLRP-3XFLAG)dFRT	2XTY1-SGFP-V5-preTEV-BLRP-3XFLAG	VK00002
814	9077719496880051 A03	spn-E	2013-09-04	Vijay Raghavan	FlyFos016351(pRedFlp-Hgr)(spn-E[34537]::2XTY1-SGFP-V5-preTEV-BLRP-3XFLAG)dFRT	2XTY1-SGFP-V5-preTEV-BLRP-3XFLAG	VK00002
816	9854504803824267 E06	oa2	2013-09-04	Vijay Raghavan	FlyFos028097(pRedFlp-Hgr)(oa2[40435]::2XTY1-SGFP-V5-preTEV-BLRP-3XFLAG)dFRT	2XTY1-SGFP-V5-preTEV-BLRP-3XFLAG	VK00002
820	9854504803824267 G10	Ent3	2013-09-04	Vijay Raghavan	FlyFos028657(pRedFlp-Hgr)(Ent3[30627]::2XTY1-SGFP-V5-preTEV-BLRP-3XFLAG)dFRT	2XTY1-SGFP-V5-preTEV-BLRP-3XFLAG	VK00002
822	1708059145882148 E08	CG3893	2013-09-04	Vijay Raghavan	FlyFos015733(pRedFlp-Hgr)(CG3893[23205]::2XTY1-SGFP-V5-preTEV-BLRP-3XFLAG)dFRT	2XTY1-SGFP-V5-preTEV-BLRP-3XFLAG	VK00002
823	1708059145882148 D11	ball	2013-09-04	Vijay Raghavan	FlyFos016090(pRedFlp-Hgr)(ball[41529]::2XTY1-SGFP-V5-preTEV-BLRP-3XFLAG)dFRT	2XTY1-SGFP-V5-preTEV-BLRP-3XFLAG	VK00002
825	1708059145882148 F06	CHMP2B	2013-09-04	Vijay Raghavan	FlyFos015467(pRedFlp-Hgr)(CHMP2B[40782]::2XTY1-SGFP-V5-preTEV-BLRP-3XFLAG)dFRT	2XTY1-SGFP-V5-preTEV-BLRP-3XFLAG	VK00002
827	1708059145882148 E10	kto	2013-09-04	Vijay Raghavan	FlyFos015902(pRedFlp-Hgr)(kto[37535]::2XTY1-SGFP-V5-preTEV-BLRP-3XFLAG)dFRT	2XTY1-SGFP-V5-preTEV-BLRP-3XFLAG	VK00002
829	1708059145882148 G05	CG2118	2013-09-04	Vijay Raghavan	FlyFos015405(pRedFlp-Hgr)(CG2118[22926]::2XTY1-SGFP-V5-preTEV-BLRP-3XFLAG)dFRT	2XTY1-SGFP-V5-preTEV-BLRP-3XFLAG	VK00002
831	9077719496880051 B05	CG5270	2013-09-04	Vijay Raghavan	FlyFos016709(pRedFlp-Hgr)(CG5270[28780]::2XTY1-SGFP-V5-preTEV-BLRP-3XFLAG)dFRT	2XTY1-SGFP-V5-preTEV-BLRP-3XFLAG	VK00002
833	9077719496880051 B09	Gale	2013-09-04	Vijay Raghavan	FlyFos017185(pRedFlp-Hgr)(Gale[33568]::2XTY1-SGFP-V5-preTEV-BLRP-3XFLAG)dFRT	2XTY1-SGFP-V5-preTEV-BLRP-3XFLAG	VK00002
836	9077719496880051 D03	BBS1	2013-09-04	Vijay Raghavan	FlyFos016392(pRedFlp-Hgr)(BBS1[34021]::2XTY1-SGFP-V5-preTEV-BLRP-3XFLAG)dFRT	2XTY1-SGFP-V5-preTEV-BLRP-3XFLAG	VK00002
838	9077719496880051 D06	Hsp26	2013-09-04	Vijay Raghavan	FlyFos016823(pRedFlp-Hgr)(Hsp26[18850]::2XTY1-SGFP-V5-preTEV-BLRP-3XFLAG)dFRT	2XTY1-SGFP-V5-preTEV-BLRP-3XFLAG	VK00002
840	9077719496880051 D08	twr	2013-09-04	Vijay Raghavan	FlyFos017040(pRedFlp-Hgr)(twr[22036]::2XTY1-SGFP-V5-preTEV-BLRP-3XFLAG)dFRT	2XTY1-SGFP-V5-preTEV-BLRP-3XFLAG	VK00002
844	9077719496880051 D12	ssh	2013-09-04	Vijay Raghavan	FlyFos017802(pRedFlp-Hgr)(ssh[38536]::2XTY1-SGFP-V5-preTEV-BLRP-3XFLAG)dFRT	2XTY1-SGFP-V5-preTEV-BLRP-3XFLAG	VK00002
845	9077719496880051 C10	CG8596	2013-09-04	Vijay Raghavan	FlyFos017596(pRedFlp-Hgr)(CG8596[18586]::2XTY1-SGFP-V5-preTEV-BLRP-3XFLAG)dFRT	2XTY1-SGFP-V5-preTEV-BLRP-3XFLAG	VK00002
846	9077719496880051 D01	Ref1	2013-09-04	Vijay Raghavan	FlyFos016270(pRedFlp-Hgr)(Ref1[41594]::2XTY1-SGFP-V5-preTEV-BLRP-3XFLAG)dFRT	2XTY1-SGFP-V5-preTEV-BLRP-3XFLAG	VK00002
848	9077719496880051 E01	alphaTub84B	2013-09-04	Vijay Raghavan	FlyFos016270(pRedFlp-Hgr)(alphaTub84B[31269]::2XTY1-SGFP-V5-preTEV-BLRP-3XFLAG)dFRT	2XTY1-SGFP-V5-preTEV-BLRP-3XFLAG	VK00002
849	9077719496880051 B12	CG14290	2013-09-04	Vijay Raghavan	FlyFos017753(pRedFlp-Hgr)(CG14290[25366]::2XTY1-SGFP-V5-preTEV-BLRP-3XFLAG)dFRT	2XTY1-SGFP-V5-preTEV-BLRP-3XFLAG	VK00002
851	9077719496880051 E03	LpR1	2013-09-04	Vijay Raghavan	FlyFos016406(pRedFlp-Hgr)(LpR1[15643]::2XTY1-SGFP-V5-preTEV-BLRP-3XFLAG)dFRT	2XTY1-SGFP-V5-preTEV-BLRP-3XFLAG	VK00002
853	9077719496880051 E07	chrb	2013-09-04	Vijay Raghavan	FlyFos016994(pRedFlp-Hgr)(chrb[18382]::2XTY1-SGFP-V5-preTEV-BLRP-3XFLAG)dFRT	2XTY1-SGFP-V5-preTEV-BLRP-3XFLAG	VK00002
855	9077719496880051 F05	Mocs2	2013-09-04	Vijay Raghavan	FlyFos016753(pRedFlp-Hgr)(Mocs2[40790]::2XTY1-SGFP-V5-preTEV-BLRP-3XFLAG)dFRT	2XTY1-SGFP-V5-preTEV-BLRP-3XFLAG	VK00002
857	9077719496880051 F12	CG10254	2013-09-04	Vijay Raghavan	FlyFos017837(pRedFlp-Hgr)(CG10254[34058]::2XTY1-SGFP-V5-preTEV-BLRP-3XFLAG)dFRT	2XTY1-SGFP-V5-preTEV-BLRP-3XFLAG	VK00002
859	9077719496880051 G06	Pi3K68D	2013-09-04	Vijay Raghavan	FlyFos016841(pRedFlp-Hgr)(Pi3K68D[16911]::2XTY1-SGFP-V5-preTEV-BLRP-3XFLAG)dFRT	2XTY1-SGFP-V5-preTEV-BLRP-3XFLAG	VK00002
861	7778023793434855 G07	Pld	2013-09-04	Vijay Raghavan	FlyFos020988(pRedFlp-Hgr)(Pld[12787]::2XTY1-SGFP-V5-preTEV-BLRP-3XFLAG)dFRT	2XTY1-SGFP-V5-preTEV-BLRP-3XFLAG	VK00033
863	1708059145882148 F10	CG16758	2013-09-04	Vijay Raghavan	FlyFos015916(pRedFlp-Hgr)(CG16758[22821]::2XTY1-SGFP-V5-preTEV-BLRP-3XFLAG)dFRT	2XTY1-SGFP-V5-preTEV-BLRP-3XFLAG	VK00002
864	7144464337096436 B10	CG8021	2013-09-10	Frank Schnorrer	FlyFos025028(pRedFlp-Hgr)(CG8021[27066]::2XTY1-SGFP-V5-preTEV-BLRP-3XFLAG)dFRT	2XTY1-SGFP-V5-preTEV-BLRP-3XFLAG	VK00033
865	8921672467940407 F07	Vinc	2013-09-17	Frank Schnorrer	FlyFos018996(pRedFlp-Hgr)(Vinc[20422]::2XTY1-SGFP-V5-preTEV-BLRP-3XFLAG)dFRT	2XTY1-SGFP-V5-preTEV-BLRP-3XFLAG	VK00033
866	7144464337096436 G04	CG32344	2013-09-17	Frank Schnorrer	FlyFos024061(pRedFlp-Hgr)(CG32344[36339]::2XTY1-SGFP-V5-preTEV-BLRP-3XFLAG)dFRT	2XTY1-SGFP-V5-preTEV-BLRP-3XFLAG	VK00033
867	7144464337096436 F12	CG34205	2013-09-17	Frank Schnorrer	FlyFos025438(pRedFlp-Hgr)(CG34205[31575]::2XTY1-SGFP-V5-preTEV-BLRP-3XFLAG)dFRT	2XTY1-SGFP-V5-preTEV-BLRP-3XFLAG	VK00033
868	2733665080679012 A06	CG16965	2013-09-20	Frank Schnorrer	FlyFos026451(pRedFlp-Hgr)(CG16965[16441]::2XTY1-SGFP-V5-preTEV-BLRP-3XFLAG)dFRT	2XTY1-SGFP-V5-preTEV-BLRP-3XFLAG	VK00033
869	2733665080679012 A05	CG10283	2013-09-20	Frank Schnorrer	FlyFos026309(pRedFlp-Hgr)(CG10283[18615]::2XTY1-SGFP-V5-preTEV-BLRP-3XFLAG)dFRT	2XTY1-SGFP-V5-preTEV-BLRP-3XFLAG	VK00033
870	2733665080679012 A11	Tbp	2013-09-20	Frank Schnorrer	FlyFos027074(pRedFlp-Hgr)(Tbp[25908]::2XTY1-SGFP-V5-preTEV-BLRP-3XFLAG)dFRT	2XTY1-SGFP-V5-preTEV-BLRP-3XFLAG	VK00033
871	2733665080679012 A09	BRWD3	2013-09-23	Frank Schnorrer	FlyFos026853(pRedFlp-Hgr)(BRWD3[33513]::2XTY1-SGFP-V5-preTEV-BLRP-3XFLAG)dFRT	2XTY1-SGFP-V5-preTEV-BLRP-3XFLAG	VK00033
872	8921672467940407 B03	MICAL-like	2013-09-23	Frank Schnorrer	FlyFos018209(pRedFlp-Hgr)(MICAL-like[21455]::2XTY1-SGFP-V5-preTEV-BLRP-3XFLAG)dFRT	2XTY1-SGFP-V5-preTEV-BLRP-3XFLAG	VK00033
873	2733665080679012 A10	CG5946	2013-09-23	Frank Schnorrer	FlyFos026959(pRedFlp-Hgr)(CG5946[32442]::2XTY1-SGFP-V5-preTEV-BLRP-3XFLAG)dFRT	2XTY1-SGFP-V5-preTEV-BLRP-3XFLAG	VK00033
874	6745694817474591 B06	rho-5	2013-09-24	Frank Schnorrer	FlyFos020437(pRedFlp-Hgr)(rho-5[39347]::2XTY1-SGFP-V5-preTEV-BLRP-3XFLAG)dFRT	2XTY1-SGFP-V5-preTEV-BLRP-3XFLAG	VK00033
875	23029740539567312 E05	yki	2013-09-24	Frank Schnorrer	FlyFos029681(pRedFlp-Hgr)(yki[19975]::2XTY1-SGFP-V5-preTEV-BLRP-3XFLAG)dFRT	2XTY1-SGFP-V5-preTEV-BLRP-3XFLAG	VK00033
876	8921672467940407 D08	fln	2013-09-24	Frank Schnorrer	FlyFos019137(pRedFlp-Hgr)(fln[34734]::2XTY1-SGFP-V5-preTEV-BLRP-3XFLAG)dFRT	2XTY1-SGFP-V5-preTEV-BLRP-3XFLAG	VK00033
877	6290259782156287 E02	cas	2013-09-27	Frank Schnorrer	FlyFos016302(pRedFlp-Hgr)(cas[20597]::2XTY1-SGFP-V5-preTEV-BLRP-3XFLAG)dFRT	2XTY1-SGFP-V5-preTEV-BLRP-3XFLAG	VK00033
878	2733665080679012 A12	CG9323	2013-09-27	Frank Schnorrer	FlyFos027187(pRedFlp-Hgr)(CG9323[16093]::2XTY1-SGFP-V5-preTEV-BLRP-3XFLAG)dFRT	2XTY1-SGFP-V5-preTEV-BLRP-3XFLAG	VK00033
879	2733665080679012 B01	CG14355	2013-10-01	Frank Schnorrer	FlyFos025486(pRedFlp-Hgr)(CG14355[25809]::2XTY1-SGFP-V5-preTEV-BLRP-3XFLAG)dFRT	2XTY1-SGFP-V5-preTEV-BLRP-3XFLAG	VK00033
883	8431894728673938 E11	CG17264	2013-10-10	Frank Schnorrer	FlyFos019177(pRedFlp-Hgr)(CG17264[35484]::2XTY1-SGFP-V5-preTEV-BLRP-3XFLAG)dFRT	2XTY1-SGFP-V5-preTEV-BLRP-3XFLAG	VK00033
884	5827172721875329 E08	ft	2013-10-11	Frank Schnorrer	FlyFos024142(pRedFlp-Hgr)(ft[14047]::2XTY1-SGFP-V5-preTEV-BLRP-3XFLAG)dFRT	2XTY1-SGFP-V5-preTEV-BLRP-3XFLAG	VK00033
885	2733665080679012 B08	Tbh	2013-10-11	Frank Schnorrer	FlyFos026791(pRedFlp-Hgr)(Tbh[13943]::2XTY1-SGFP-V5-preTEV-BLRP-3XFLAG)dFRT	2XTY1-SGFP-V5-preTEV-BLRP-3XFLAG	VK00033
886	7144464337096436 B04	HDAC6	2013-10-14	Frank Schnorrer	FlyFos023991(pRedFlp-Hgr)(HDAC6[37348]::2XTY1-SGFP-V5-preTEV-BLRP-3XFLAG)dFRT	2XTY1-SGFP-V5-preTEV-BLRP-3XFLAG	VK00033
887	7144464337096436 G11	Nhe3	2013-10-14	Frank Schnorrer	FlyFos025262(pRedFlp-Hgr)(Nhe3[24901]::2XTY1-SGFP-V5-preTEV-BLRP-3XFLAG)dFRT	2XTY1-SGFP-V5-preTEV-BLRP-3XFLAG	VK00033
888	7144464337096436 H09	Nop60B	2013-10-14	Frank Schnorrer	FlyFos024986(pRedFlp-Hgr)(Nop60B[29552]::2XTY1-SGFP-V5-preTEV-BLRP-3XFLAG)dFRT	2XTY1-SGFP-V5-preTEV-BLRP-3XFLAG	VK00033
889	5827172721875329 E12	brk	2013-10-15	Frank Schnorrer	FlyFos024884(pRedFlp-Hgr)(brk[25146]::2XTY1-SGFP-V5-preTEV-BLRP-3XFLAG)dFRT	2XTY1-SGFP-V5-preTEV-BLRP-3XFLAG	VK00033
890	03355975781483189 E01	X11L	2013-10-17	Frank Schnorrer	FlyFos014925(pRedFlp-Hgr)(X11L[38860]::2XTY1-SGFP-V5-preTEV-BLRP-3XFLAG)dFRT	2XTY1-SGFP-V5-preTEV-BLRP-3XFLAG	VK00033
891	03355975781483189 G03	mav	2013-10-17	Frank Schnorrer	FlyFos015198(pRedFlp-Hgr)(mav[18460]::2XTY1-SGFP-V5-preTEV-BLRP-3XFLAG)dFRT	2XTY1-SGFP-V5-preTEV-BLRP-3XFLAG	VK00033
892	03355975781483189 F09	Ent2	2013-10-17	Frank Schnorrer	FlyFos015813(pRedFlp-Hgr)(Ent2[27379]::2XTY1-SGFP-V5-preTEV-BLRP-3XFLAG)dFRT	2XTY1-SGFP-V5-preTEV-BLRP-3XFLAG	VK00033
893	7144464337096436 H07	CG10627	2013-10-17	Frank Schnorrer	FlyFos024707(pRedFlp-Hgr)(CG10627[43045]::2XTY1-SGFP-V5-preTEV-BLRP-3XFLAG)dFRT	2XTY1-SGFP-V5-preTEV-BLRP-3XFLAG	VK00033
894	2733665080679012 B10	wge	2013-10-17	Frank Schnorrer	FlyFos026969(pRedFlp-Hgr)(wge[36137]::2XTY1-SGFP-V5-preTEV-BLRP-3XFLAG)dFRT	2XTY1-SGFP-V5-preTEV-BLRP-3XFLAG	VK00033
895	7144464337096436 D05	Fim	2013-10-18	Frank Schnorrer	FlyFos024333(pRedFlp-Hgr)(Fim[36982]::2XTY1-SGFP-V5-preTEV-BLRP-3XFLAG)dFRT	2XTY1-SGFP-V5-preTEV-BLRP-3XFLAG	VK00033
896	2733665080679012 C02	beta4GalT7	2013-10-18	Frank Schnorrer	FlyFos025648(pRedFlp-Hgr)(beta4GalT7[24182]::2XTY1-SGFP-V5-preTEV-BLRP-3XFLAG)dFRT	2XTY1-SGFP-V5-preTEV-BLRP-3XFLAG	VK00033
897	2733665080679012 C06	Nplp4	2013-10-18	Frank Schnorrer	FlyFos026492(pRedFlp-Hgr)(Nplp4[30910]::2XTY1-SGFP-V5-preTEV-BLRP-3XFLAG)dFRT	2XTY1-SGFP-V5-preTEV-BLRP-3XFLAG	VK00033
900	2733665080679012 D12	Rfabg	2013-10-25	Frank Schnorrer	FlyFos027263(pRedFlp-Hgr)(Rfabg[30509]::2XTY1-SGFP-V5-preTEV-BLRP-3XFLAG)dFRT	2XTY1-SGFP-V5-preTEV-BLRP-3XFLAG	VK00033
901	2733665080679012 D03	CG8635	2013-10-25	Frank Schnorrer	FlyFos025931(pRedFlp-Hgr)(CG8635[28623]::2XTY1-SGFP-V5-preTEV-BLRP-3XFLAG)dFRT	2XTY1-SGFP-V5-preTEV-BLRP-3XFLAG	VK00033
902	2733665080679012 D10	rt	2013-10-25	Frank Schnorrer	FlyFos027005(pRedFlp-Hgr)(rt[23621]::2XTY1-SGFP-V5-preTEV-BLRP-3XFLAG)dFRT	2XTY1-SGFP-V5-preTEV-BLRP-3XFLAG	VK00033
903	2733665080679012 E01	BBS4	2013-10-28	Frank Schnorrer	FlyFos025620(pRedFlp-Hgr)(BBS4[34986]::2XTY1-SGFP-V5-preTEV-BLRP-3XFLAG)dFRT	2XTY1-SGFP-V5-preTEV-BLRP-3XFLAG	VK00033
904	2733665080679012 D11	CG8064	2013-10-29	Frank Schnorrer	FlyFos027138(pRedFlp-Hgr)(CG8064[16979]::2XTY1-SGFP-V5-preTEV-BLRP-3XFLAG)dFRT	2XTY1-SGFP-V5-preTEV-BLRP-3XFLAG	VK00033
905	014526891357111271 H05	Mnf	2013-10-31	Frank Schnorrer	FlyFos028737(pRedFlp-Hgr)(Mnf[18440]::2XTY1-SGFP-V5-preTEV-BLRP-3XFLAG)dFRT	2XTY1-SGFP-V5-preTEV-BLRP-3XFLAG	VK00033
906	6196214900843875 C08	unc-5	2013-10-31	Frank Schnorrer	FlyFos031264(pRedFlp-Hgr)(unc-5[49551]::2XTY1-SGFP-V5-preTEV-BLRP-3XFLAG)dFRT	2XTY1-SGFP-V5-preTEV-BLRP-3XFLAG	VK00033
908	8431894728673938 G03	CG3032	2013-10-31	Frank Schnorrer	FlyFos018111(pRedFlp-Hgr)(CG3032[27174]::2XTY1-SGFP-V5-preTEV-BLRP-3XFLAG)dFRT	2XTY1-SGFP-V5-preTEV-BLRP-3XFLAG	VK00033
909	9077719496880051 B03	Nplp2	2013-10-31	Frank Schnorrer	FlyFos016357(pRedFlp-Hgr)(Nplp2[22705]::2XTY1-SGFP-V5-preTEV-BLRP-3XFLAG)dFRT	2XTY1-SGFP-V5-preTEV-BLRP-3XFLAG	VK00033
910	5827172721875329 C08	put	2013-10-31	Frank Schnorrer	FlyFos024141(pRedFlp-Hgr)(put[25431]::2XTY1-SGFP-V5-preTEV-BLRP-3XFLAG)dFRT	2XTY1-SGFP-V5-preTEV-BLRP-3XFLAG	VK00033
911	8431894728673938 B10	CG13624	2013-10-31	Frank Schnorrer	FlyFos018960(pRedFlp-Hgr)(CG13624[37493]::2XTY1-SGFP-V5-preTEV-BLRP-3XFLAG)dFRT	2XTY1-SGFP-V5-preTEV-BLRP-3XFLAG	VK00033
912	2733665080679012 E09	Hel89B	2013-11-01	Frank Schnorrer	FlyFos026935(pRedFlp-Hgr)(Hel89B[43413]::2XTY1-SGFP-V5-preTEV-BLRP-3XFLAG)dFRT	2XTY1-SGFP-V5-preTEV-BLRP-3XFLAG	VK00033
913	2733665080679012 E03	Ssrp	2013-11-01	Frank Schnorrer	FlyFos025933(pRedFlp-Hgr)(Ssrp[29678]::2XTY1-SGFP-V5-preTEV-BLRP-3XFLAG)dFRT	2XTY1-SGFP-V5-preTEV-BLRP-3XFLAG	VK00033
914	2733665080679012 C03	Top3alpha	2013-11-01	Frank Schnorrer	FlyFos025861(pRedFlp-Hgr)(Top3alpha[19411]::2XTY1-SGFP-V5-preTEV-BLRP-3XFLAG)dFRT	2XTY1-SGFP-V5-preTEV-BLRP-3XFLAG	VK00033
915	2733665080679012 E08	RhoL	2013-11-01	Frank Schnorrer	FlyFos026816(pRedFlp-Hgr)(RhoL[23320]::2XTY1-SGFP-V5-preTEV-BLRP-3XFLAG)dFRT	2XTY1-SGFP-V5-preTEV-BLRP-3XFLAG	VK00033
916	2733665080679012 E05	CG5316	2013-11-01	Frank Schnorrer	FlyFos026411(pRedFlp-Hgr)(CG5316[21287]::2XTY1-SGFP-V5-preTEV-BLRP-3XFLAG)dFRT	2XTY1-SGFP-V5-preTEV-BLRP-3XFLAG	VK00033
917	7144464337096436 F08	CG5514	2013-11-04	Frank Schnorrer	FlyFos024854(pRedFlp-Hgr)(CG5514[27178]::2XTY1-SGFP-V5-preTEV-BLRP-3XFLAG)dFRT	2XTY1-SGFP-V5-preTEV-BLRP-3XFLAG	VK00033
919	2733665080679012 F03	CG6287	2013-11-07	Frank Schnorrer	FlyFos025957(pRedFlp-Hgr)(CG6287[20901]::2XTY1-SGFP-V5-preTEV-BLRP-3XFLAG)dFRT	2XTY1-SGFP-V5-preTEV-BLRP-3XFLAG	VK00033
920	2733665080679012 F05	Cbs	2013-11-07	Frank Schnorrer	FlyFos026416(pRedFlp-Hgr)(Cbs[21822]::2XTY1-SGFP-V5-preTEV-BLRP-3XFLAG)dFRT	2XTY1-SGFP-V5-preTEV-BLRP-3XFLAG	VK00033
921	2733665080679012 E10	l(2)35Df	2013-11-07	Frank Schnorrer	FlyFos027024(pRedFlp-Hgr)(l(2)35Df[31954]::2XTY1-SGFP-V5-preTEV-BLRP-3XFLAG)dFRT	2XTY1-SGFP-V5-preTEV-BLRP-3XFLAG	VK00033
922	2733665080679012 B05	Vmat	2013-11-08	Frank Schnorrer	FlyFos026334(pRedFlp-Hgr)(Vmat[28818]::2XTY1-SGFP-V5-preTEV-BLRP-3XFLAG)dFRT	2XTY1-SGFP-V5-preTEV-BLRP-3XFLAG	VK00033
923	2733665080679012 F08	Ras85D	2013-11-08	Frank Schnorrer	FlyFos026816(pRedFlp-Hgr)(Ras85D[37411]::2XTY1-SGFP-V5-preTEV-BLRP-3XFLAG)dFRT	2XTY1-SGFP-V5-preTEV-BLRP-3XFLAG	VK00033
924	2733665080679012 A03	CkIIalpha	2013-11-08	Frank Schnorrer	FlyFos025829(pRedFlp-Hgr)(CkIIalpha[24900]::2XTY1-SGFP-V5-preTEV-BLRP-3XFLAG)dFRT	2XTY1-SGFP-V5-preTEV-BLRP-3XFLAG	VK00033
925	2733665080679012 B04	wupA	2013-11-12	Frank Schnorrer	FlyFos026158(pRedFlp-Hgr)(wupA[28943]::2XTY1-SGFP-V5-preTEV-BLRP-3XFLAG)dFRT	2XTY1-SGFP-V5-preTEV-BLRP-3XFLAG	VK00033
926	2733665080679012 F12	qkr54B	2013-11-15	Frank Schnorrer	FlyFos027290(pRedFlp-Hgr)(qkr54B[30276]::2XTY1-SGFP-V5-preTEV-BLRP-3XFLAG)dFRT	2XTY1-SGFP-V5-preTEV-BLRP-3XFLAG	VK00033
927	2733665080679012 H05	MED30	2013-11-15	Frank Schnorrer	FlyFos026450(pRedFlp-Hgr)(MED30[22382]::2XTY1-SGFP-V5-preTEV-BLRP-3XFLAG)dFRT	2XTY1-SGFP-V5-preTEV-BLRP-3XFLAG	VK00033
928	2733665080679012 F09	mor	2013-11-15	Frank Schnorrer	FlyFos026935(pRedFlp-Hgr)(mor[28479]::2XTY1-SGFP-V5-preTEV-BLRP-3XFLAG)dFRT	2XTY1-SGFP-V5-preTEV-BLRP-3XFLAG	VK00033
929	2733665080679012 G03	xmas-2	2013-11-15	Frank Schnorrer	FlyFos025989(pRedFlp-Hgr)(xmas-2[23383]::2XTY1-SGFP-V5-preTEV-BLRP-3XFLAG)dFRT	2XTY1-SGFP-V5-preTEV-BLRP-3XFLAG	VK00033
930	7144464337096436 A07	Hrb27C	2013-11-18	Frank Schnorrer	FlyFos024565(pRedFlp-Hgr)(Hrb27C[28387]::2XTY1-SGFP-V5-preTEV-BLRP-3XFLAG)dFRT	2XTY1-SGFP-V5-preTEV-BLRP-3XFLAG	VK00033
931	2733665080679012 G04	Rab35	2013-11-18	Frank Schnorrer	FlyFos026271(pRedFlp-Hgr)(Rab35[30316]::2XTY1-SGFP-V5-preTEV-BLRP-3XFLAG)dFRT	2XTY1-SGFP-V5-preTEV-BLRP-3XFLAG	VK00033
932	5827172721875329 D11	mys	2013-11-19	Frank Schnorrer	FlyFos024709(pRedFlp-Hgr)(mys[29395]::2XTY1-SGFP-V5-preTEV-BLRP-3XFLAG)dFRT	2XTY1-SGFP-V5-preTEV-BLRP-3XFLAG	VK00033
934	2733665080679012 G11	Su(dx)	2013-11-21	Frank Schnorrer	FlyFos027162(pRedFlp-Hgr)(Su(dx)[20330]::2XTY1-SGFP-V5-preTEV-BLRP-3XFLAG)dFRT	2XTY1-SGFP-V5-preTEV-BLRP-3XFLAG	VK00033
935	9077719496880051 H04	Aac11	2013-11-21	Frank Schnorrer	FlyFos016604(pRedFlp-Hgr)(Aac11[37877]::2XTY1-SGFP-V5-preTEV-BLRP-3XFLAG)dFRT	2XTY1-SGFP-V5-preTEV-BLRP-3XFLAG	VK00033
936	2733665080679012 G08	CG10333	2013-11-21	Frank Schnorrer	FlyFos026832(pRedFlp-Hgr)(CG10333[29130]::2XTY1-SGFP-V5-preTEV-BLRP-3XFLAG)dFRT	2XTY1-SGFP-V5-preTEV-BLRP-3XFLAG	VK00033
937	2733665080679012 H06	nrv2	2013-11-22	Frank Schnorrer	FlyFos026598(pRedFlp-Hgr)(nrv2[21644]::2XTY1-SGFP-V5-preTEV-BLRP-3XFLAG)dFRT	2XTY1-SGFP-V5-preTEV-BLRP-3XFLAG	VK00033
938	2733665080679012 H12	Ugt86Da	2013-11-25	Frank Schnorrer	FlyFos027371(pRedFlp-Hgr)(Ugt86Da[35306]::2XTY1-SGFP-V5-preTEV-BLRP-3XFLAG)dFRT	2XTY1-SGFP-V5-preTEV-BLRP-3XFLAG	VK00033
939	2733665080679012 H09	eIF-4B	2013-11-25	Frank Schnorrer	FlyFos026951(pRedFlp-Hgr)(eIF-4B[36478]::2XTY1-SGFP-V5-preTEV-BLRP-3XFLAG)dFRT	2XTY1-SGFP-V5-preTEV-BLRP-3XFLAG	VK00033
940	2733665080679012 H07	CG7470	2013-11-25	Frank Schnorrer	FlyFos026777(pRedFlp-Hgr)(CG7470[40243]::2XTY1-SGFP-V5-preTEV-BLRP-3XFLAG)dFRT	2XTY1-SGFP-V5-preTEV-BLRP-3XFLAG	VK00033
941	2733665080679012 H08	CG5720	2013-11-26	Frank Schnorrer	FlyFos026853(pRedFlp-Hgr)(CG5720[20301]::2XTY1-SGFP-V5-preTEV-BLRP-3XFLAG)dFRT	2XTY1-SGFP-V5-preTEV-BLRP-3XFLAG	VK00033
942	9854504803824267 A02	CG4612	2013-11-26	Frank Schnorrer	FlyFos027554(pRedFlp-Hgr)(CG4612[32162]::2XTY1-SGFP-V5-preTEV-BLRP-3XFLAG)dFRT	2XTY1-SGFP-V5-preTEV-BLRP-3XFLAG	VK00033
943	2733665080679012 H02	Men-b	2013-11-29	Frank Schnorrer	FlyFos025820(pRedFlp-Hgr)(Men-b[18760]::2XTY1-SGFP-V5-preTEV-BLRP-3XFLAG)dFRT	2XTY1-SGFP-V5-preTEV-BLRP-3XFLAG	VK00033
944	9854504803824267 A04	Mal-A1	2013-12-02	Frank Schnorrer	FlyFos027733(pRedFlp-Hgr)(Mal-A1[22466]::2XTY1-SGFP-V5-preTEV-BLRP-3XFLAG)dFRT	2XTY1-SGFP-V5-preTEV-BLRP-3XFLAG	VK00033
945	2733665080679012 B03	CG7376	2013-12-02	Frank Schnorrer	FlyFos025837(pRedFlp-Hgr)(CG7376[16454]::2XTY1-SGFP-V5-preTEV-BLRP-3XFLAG)dFRT	2XTY1-SGFP-V5-preTEV-BLRP-3XFLAG	VK00033
946	2733665080679012 H04	proPO-A1	2013-12-02	Frank Schnorrer	FlyFos026277(pRedFlp-Hgr)(proPO-A1[21048]::2XTY1-SGFP-V5-preTEV-BLRP-3XFLAG)dFRT	2XTY1-SGFP-V5-preTEV-BLRP-3XFLAG	VK00033
947	2733665080679012 H01	CG3335	2013-12-03	Frank Schnorrer	FlyFos025640(pRedFlp-Hgr)(CG3335[16873]::2XTY1-SGFP-V5-preTEV-BLRP-3XFLAG)dFRT	2XTY1-SGFP-V5-preTEV-BLRP-3XFLAG	VK00033
948	9854504803824267 C11	trpml	2013-12-03	Frank Schnorrer	FlyFos028785(pRedFlp-Hgr)(trpml[29279]::2XTY1-SGFP-V5-preTEV-BLRP-3XFLAG)dFRT	2XTY1-SGFP-V5-preTEV-BLRP-3XFLAG	VK00033
949	9854504803824267 A03	CG4806	2013-12-03	Frank Schnorrer	FlyFos027626(pRedFlp-Hgr)(CG4806[32608]::2XTY1-SGFP-V5-preTEV-BLRP-3XFLAG)dFRT	2XTY1-SGFP-V5-preTEV-BLRP-3XFLAG	VK00033
951	7778023793434855 B02	btl	2013-12-05	Frank Schnorrer	FlyFos019991(pRedFlp-Hgr)(btl[26777]::2XTY1-SGFP-V5-preTEV-BLRP-3XFLAG)dFRT	2XTY1-SGFP-V5-preTEV-BLRP-3XFLAG	VK00033
952	06656881586833885 H12	RhoGAP102A	2013-12-06	Frank Schnorrer	FlyFos026342(pRedFlp-Hgr)(RhoGAP102A[33747]::2XTY1-SGFP-V5-preTEV-BLRP-3XFLAG)dFRT	2XTY1-SGFP-V5-preTEV-BLRP-3XFLAG	VK00033
953	10123066965770744 A11	galectin	2013-12-06	Frank Schnorrer	FlyFos017025(pRedFlp-Hgr)(galectin[45042]::S000169_fly_pretag)::2XTY1-SGFP-V5-preTEV-BLRP-3XFLAGdFRT	2XTY1-SGFP-V5-preTEV-BLRP-3XFLAG	VK00033
954	5148609705659553 C01	Kif3C	2013-12-09	Frank Schnorrer	FlyFos019342(pRedFlp-Hgr)(Kif3C[18988]::S000169_fly_pretag)::2XTY1-SGFP-V5-preTEV-BLRP-3XFLAGdFRT	2XTY1-SGFP-V5-preTEV-BLRP-3XFLAG	VK00033
955	14365767356821757 F05	CaMKII	2013-12-09	Frank Schnorrer	FlyFos025846(pRedFlp-Hgr)(CaMKII[46811]::S000169_fly_pretag)::2XTY1-SGFP-V5-preTEV-BLRP-3XFLAGdFRT	2XTY1-SGFP-V5-preTEV-BLRP-3XFLAG	VK00033
956	8882336809946705 A06	rost	2013-12-09	Frank Schnorrer	FlyFos017080(pRedFlp-Hgr)(rost[24324]::S000169_fly_pretag)::2XTY1-SGFP-V5-preTEV-BLRP-3XFLAGdFRT	2XTY1-SGFP-V5-preTEV-BLRP-3XFLAG	VK00033
957	6196214900843875 G09	sec5	2013-12-10	Frank Schnorrer	FlyFos031517(pRedFlp-Hgr)(sec5[19565]::2XTY1-SGFP-V5-preTEV-BLRP-3XFLAG)dFRT	2XTY1-SGFP-V5-preTEV-BLRP-3XFLAG	VK00033
958	014526891357111271 D07	betaTub60D	2013-12-10	Frank Schnorrer	FlyFos029115(pRedFlp-Hgr)(betaTub60D[32130]::2XTY1-SGFP-V5-preTEV-BLRP-3XFLAG)dFRT	2XTY1-SGFP-V5-preTEV-BLRP-3XFLAG	VK00033
959	479989416669368 B09	Dif	2013-12-10	Frank Schnorrer	FlyFos017171(pRedFlp-Hgr)(Dif[16081]::S000169_fly_pretag)::2XTY1-SGFP-V5-preTEV-BLRP-3XFLAGdFRT	2XTY1-SGFP-V5-preTEV-BLRP-3XFLAG	VK00033
960	02182476214419926 D03	grk	2013-12-11	Frank Schnorrer	FlyFos015790(pRedFlp-Hgr)(grk[41189]::S000169_fly_pretag)::2XTY1-SGFP-V5-preTEV-BLRP-3XFLAGdFRT	2XTY1-SGFP-V5-preTEV-BLRP-3XFLAG	VK00033
961	1367792136965469 C01	Grip71	2013-12-13	Frank Schnorrer	FlyFos022991(pRedFlp-Hgr)(Grip71[31145]::S000169_fly_pretag)::2XTY1-SGFP-V5-preTEV-BLRP-3XFLAGdFRT	2XTY1-SGFP-V5-preTEV-BLRP-3XFLAG	VK00033
962	1367792136965469 F12	Tango14	2013-12-13	Frank Schnorrer	FlyFos023131(pRedFlp-Hgr)(Tango14[35397]::S000169_fly_pretag)::2XTY1-SGFP-V5-preTEV-BLRP-3XFLAGdFRT	2XTY1-SGFP-V5-preTEV-BLRP-3XFLAG	VK00033
963	6581804864395902 B06	Tango6	2013-12-13	Frank Schnorrer	FlyFos030368(pRedFlp-Hgr)(Tango6[29404]::S000169_fly_pretag)::2XTY1-SGFP-V5-preTEV-BLRP-3XFLAGdFRT	2XTY1-SGFP-V5-preTEV-BLRP-3XFLAG	VK00033
964	9182056246972252 F02	hoip	2013-12-16	Frank Schnorrer	FlyFos022126(pRedFlp-Hgr)(hoip[24372]::S000169_fly_pretag)::2XTY1-SGFP-V5-preTEV-BLRP-3XFLAGdFRT	2XTY1-SGFP-V5-preTEV-BLRP-3XFLAG	VK00033
965	6783989818602556 F08	Klc	2013-12-18	Frank Schnorrer	FlyFos020010(pRedFlp-Hgr)(Klc[28658]::S000169_fly_pretag)::2XTY1-SGFP-V5-preTEV-BLRP-3XFLAGdFRT	2XTY1-SGFP-V5-preTEV-BLRP-3XFLAG	VK00033
966	26965044486605927 D01	Nedd8	2013-12-18	Frank Schnorrer	FlyFos028665(pRedFlp-Hgr)(Nedd8[35789]::S000169_fly_pretag)::2XTY1-SGFP-V5-preTEV-BLRP-3XFLAGdFRT	2XTY1-SGFP-V5-preTEV-BLRP-3XFLAG	VK00033
967	6475152880377884 G02	crok	2013-12-18	Frank Schnorrer	FlyFos029759(pRedFlp-Hgr)(crok[32407]::S000169_fly_pretag)::2XTY1-SGFP-V5-preTEV-BLRP-3XFLAGdFRT	2XTY1-SGFP-V5-preTEV-BLRP-3XFLAG	VK00033
969	8921672467940407 H12	CG6409	2014-02-05	Vijay Raghavan	FlyFos019840(pRedFlp-Hgr)(CG6409[24205]::2XTY1-SGFP-V5-preTEV-BLRP-3XFLAG)dFRT	2XTY1-SGFP-V5-preTEV-BLRP-3XFLAG	VK00002
971	8921672467940407 H10	CG5541	2014-02-05	Vijay Raghavan	FlyFos019582(pRedFlp-Hgr)(CG5541[27553]::2XTY1-SGFP-V5-preTEV-BLRP-3XFLAG)dFRT	2XTY1-SGFP-V5-preTEV-BLRP-3XFLAG	VK00002
973	8921672467940407 H05	Ino80	2014-02-05	Vijay Raghavan	FlyFos018650(pRedFlp-Hgr)(Ino80[49102]::2XTY1-SGFP-V5-preTEV-BLRP-3XFLAG)dFRT	2XTY1-SGFP-V5-preTEV-BLRP-3XFLAG	VK00002
975	8921672467940407 G05	MED4	2014-02-05	Vijay Raghavan	FlyFos018644(pRedFlp-Hgr)(MED4[21361]::2XTY1-SGFP-V5-preTEV-BLRP-3XFLAG)dFRT	2XTY1-SGFP-V5-preTEV-BLRP-3XFLAG	VK00002
977	8921672467940407 G02	ppl	2014-02-05	Vijay Raghavan	FlyFos018181(pRedFlp-Hgr)(ppl[41472]::2XTY1-SGFP-V5-preTEV-BLRP-3XFLAG)dFRT	2XTY1-SGFP-V5-preTEV-BLRP-3XFLAG	VK00002
979	9077719496880051 H10	MED17	2014-02-05	Vijay Raghavan	FlyFos017613(pRedFlp-Hgr)(MED17[37739]::2XTY1-SGFP-V5-preTEV-BLRP-3XFLAG)dFRT	2XTY1-SGFP-V5-preTEV-BLRP-3XFLAG	VK00002
981	8921672467940407 F05	Neos	2014-02-05	Vijay Raghavan	FlyFos018644(pRedFlp-Hgr)(Neos[27923]::2XTY1-SGFP-V5-preTEV-BLRP-3XFLAG)dFRT	2XTY1-SGFP-V5-preTEV-BLRP-3XFLAG	VK00002
983	8921672467940407 E06	Gyk	2014-02-05	Vijay Raghavan	FlyFos018795(pRedFlp-Hgr)(Gyk[27342]::2XTY1-SGFP-V5-preTEV-BLRP-3XFLAG)dFRT	2XTY1-SGFP-V5-preTEV-BLRP-3XFLAG	VK00002
985	8921672467940407 E12	Girdin	2014-02-05	Vijay Raghavan	FlyFos019724(pRedFlp-Hgr)(Girdin[30536]::2XTY1-SGFP-V5-preTEV-BLRP-3XFLAG)dFRT	2XTY1-SGFP-V5-preTEV-BLRP-3XFLAG	VK00002
986	8921672467940407 F01	RhoGDI	2014-02-05	Vijay Raghavan	FlyFos018037(pRedFlp-Hgr)(RhoGDI[29757]::2XTY1-SGFP-V5-preTEV-BLRP-3XFLAG)dFRT	2XTY1-SGFP-V5-preTEV-BLRP-3XFLAG	VK00002
987	8921672467940407 E05	CG12582	2014-02-05	Vijay Raghavan	FlyFos018627(pRedFlp-Hgr)(CG12582[22526]::2XTY1-SGFP-V5-preTEV-BLRP-3XFLAG)dFRT	2XTY1-SGFP-V5-preTEV-BLRP-3XFLAG	VK00002
988	8921672467940407 D12	OstStt3	2014-02-05	Vijay Raghavan	FlyFos019695(pRedFlp-Hgr)(OstStt3[17068]::2XTY1-SGFP-V5-preTEV-BLRP-3XFLAG)dFRT	2XTY1-SGFP-V5-preTEV-BLRP-3XFLAG	VK00002
990	8921672467940407 D07	pUf68	2014-02-05	Vijay Raghavan	FlyFos018957(pRedFlp-Hgr)(pUf68[29348]::2XTY1-SGFP-V5-preTEV-BLRP-3XFLAG)dFRT	2XTY1-SGFP-V5-preTEV-BLRP-3XFLAG	VK00002
992	8921672467940407 E10	CG18012	2014-02-05	Vijay Raghavan	FlyFos019493(pRedFlp-Hgr)(CG18012[23520]::2XTY1-SGFP-V5-preTEV-BLRP-3XFLAG)dFRT	2XTY1-SGFP-V5-preTEV-BLRP-3XFLAG	VK00002
994	8921672467940407 C08	CG7922	2014-02-05	Vijay Raghavan	FlyFos019045(pRedFlp-Hgr)(CG7922[33850]::2XTY1-SGFP-V5-preTEV-BLRP-3XFLAG)dFRT	2XTY1-SGFP-V5-preTEV-BLRP-3XFLAG	VK00002
996	8921672467940407 B11	Mgat2	2014-02-05	Vijay Raghavan	FlyFos019606(pRedFlp-Hgr)(Mgat2[33109]::2XTY1-SGFP-V5-preTEV-BLRP-3XFLAG)dFRT	2XTY1-SGFP-V5-preTEV-BLRP-3XFLAG	VK00002
998	8921672467940407 B10	CG10881	2014-02-05	Vijay Raghavan	FlyFos019416(pRedFlp-Hgr)(CG10881[27362]::2XTY1-SGFP-V5-preTEV-BLRP-3XFLAG)dFRT	2XTY1-SGFP-V5-preTEV-BLRP-3XFLAG	VK00002
1000	8921672467940407 B08	CG5205	2014-02-05	Vijay Raghavan	FlyFos019039(pRedFlp-Hgr)(CG5205[18045]::2XTY1-SGFP-V5-preTEV-BLRP-3XFLAG)dFRT	2XTY1-SGFP-V5-preTEV-BLRP-3XFLAG	VK00002
1004	8921672467940407 B05	CG1146	2014-02-05	Vijay Raghavan	FlyFos018588(pRedFlp-Hgr)(CG1146[35004]::2XTY1-SGFP-V5-preTEV-BLRP-3XFLAG)dFRT	2XTY1-SGFP-V5-preTEV-BLRP-3XFLAG	VK00002
1007	8921672467940407 A08	CG5213	2014-02-05	Vijay Raghavan	FlyFos019039(pRedFlp-Hgr)(CG5213[15473]::2XTY1-SGFP-V5-preTEV-BLRP-3XFLAG)dFRT	2XTY1-SGFP-V5-preTEV-BLRP-3XFLAG	VK00002
1009	8921672467940407 A04	glo	2014-02-05	Vijay Raghavan	FlyFos018316(pRedFlp-Hgr)(glo[19733]::2XTY1-SGFP-V5-preTEV-BLRP-3XFLAG)dFRT	2XTY1-SGFP-V5-preTEV-BLRP-3XFLAG	VK00002
1011	8921672467940407 A06	CG11726	2014-02-05	Vijay Raghavan	FlyFos018721(pRedFlp-Hgr)(CG11726[30589]::2XTY1-SGFP-V5-preTEV-BLRP-3XFLAG)dFRT	2XTY1-SGFP-V5-preTEV-BLRP-3XFLAG	VK00002
1013	9077719496880051 H12	Sac1	2014-02-05	Vijay Raghavan	FlyFos017964(pRedFlp-Hgr)(Sac1[18970]::2XTY1-SGFP-V5-preTEV-BLRP-3XFLAG)dFRT	2XTY1-SGFP-V5-preTEV-BLRP-3XFLAG	VK00002
1015	9077719496880051 H11	CG4288	2014-02-05	Vijay Raghavan	FlyFos017694(pRedFlp-Hgr)(CG4288[22582]::2XTY1-SGFP-V5-preTEV-BLRP-3XFLAG)dFRT	2XTY1-SGFP-V5-preTEV-BLRP-3XFLAG	VK00002
1017	9077719496880051 H07	Ppcs	2014-02-05	Vijay Raghavan	FlyFos017035(pRedFlp-Hgr)(Ppcs[36286]::2XTY1-SGFP-V5-preTEV-BLRP-3XFLAG)dFRT	2XTY1-SGFP-V5-preTEV-BLRP-3XFLAG	VK00002
1019	8921672467940407 G01	CG34377	2014-02-05	Vijay Raghavan	FlyFos018089(pRedFlp-Hgr)(CG34377[42301]::2XTY1-SGFP-V5-preTEV-BLRP-3XFLAG)dFRT	2XTY1-SGFP-V5-preTEV-BLRP-3XFLAG	VK00002
1020	9077719496880051 A12	CG32066	2014-02-05	Vijay Raghavan	FlyFos017698(pRedFlp-Hgr)(CG32066[14016]::2XTY1-SGFP-V5-preTEV-BLRP-3XFLAG)dFRT	2XTY1-SGFP-V5-preTEV-BLRP-3XFLAG	VK00002
1022	7778023793434855 A03	U2af50	2014-02-06	Vijay Raghavan	FlyFos020234(pRedFlp-Hgr)(U2af50[27522]::2XTY1-SGFP-V5-preTEV-BLRP-3XFLAG)dFRT	2XTY1-SGFP-V5-preTEV-BLRP-3XFLAG	VK00002
1023	7778023793434855 A10	mats	2014-02-06	Vijay Raghavan	FlyFos021577(pRedFlp-Hgr)(mats[33248]::2XTY1-SGFP-V5-preTEV-BLRP-3XFLAG)dFRT	2XTY1-SGFP-V5-preTEV-BLRP-3XFLAG	VK00002
1025	7778023793434855 B01	CG6418	2014-02-06	Vijay Raghavan	FlyFos019859(pRedFlp-Hgr)(CG6418[19989]::2XTY1-SGFP-V5-preTEV-BLRP-3XFLAG)dFRT	2XTY1-SGFP-V5-preTEV-BLRP-3XFLAG	VK00002
1029	7778023793434855 C05	Cchl	2014-02-06	Vijay Raghavan	FlyFos020628(pRedFlp-Hgr)(Cchl[34285]::2XTY1-SGFP-V5-preTEV-BLRP-3XFLAG)dFRT	2XTY1-SGFP-V5-preTEV-BLRP-3XFLAG	VK00002
1031	7778023793434855 C10	tub	2014-02-06	Vijay Raghavan	FlyFos021597(pRedFlp-Hgr)(tub[21748]::2XTY1-SGFP-V5-preTEV-BLRP-3XFLAG)dFRT	2XTY1-SGFP-V5-preTEV-BLRP-3XFLAG	VK00002
1033	7778023793434855 D01	CG5589	2014-02-06	Vijay Raghavan	FlyFos019925(pRedFlp-Hgr)(CG5589[20851]::2XTY1-SGFP-V5-preTEV-BLRP-3XFLAG)dFRT	2XTY1-SGFP-V5-preTEV-BLRP-3XFLAG	VK00002
1035	7778023793434855 D05	pit	2014-02-06	Vijay Raghavan	FlyFos020628(pRedFlp-Hgr)(pit[22142]::2XTY1-SGFP-V5-preTEV-BLRP-3XFLAG)dFRT	2XTY1-SGFP-V5-preTEV-BLRP-3XFLAG	VK00002
1037	7778023793434855 D06	dco	2014-02-06	Vijay Raghavan	FlyFos020844(pRedFlp-Hgr)(dco[24229]::2XTY1-SGFP-V5-preTEV-BLRP-3XFLAG)dFRT	2XTY1-SGFP-V5-preTEV-BLRP-3XFLAG	VK00002
1038	7778023793434855 C11	Cbp20	2014-02-06	Vijay Raghavan	FlyFos021729(pRedFlp-Hgr)(Cbp20[27396]::2XTY1-SGFP-V5-preTEV-BLRP-3XFLAG)dFRT	2XTY1-SGFP-V5-preTEV-BLRP-3XFLAG	VK00002
1039	77426861790443 G05	18w	2014-02-10	Frank Schnorrer	FlyFos030035(pRedFlp-Hgr)(18w[27647]::S000169_fly_pretag)::2XTY1-SGFP-V5-preTEV-BLRP-3XFLAGdFRT	2XTY1-SGFP-V5-preTEV-BLRP-3XFLAG	VK00033
1040	9926817166096907 H08	slim	2014-02-10	Frank Schnorrer	FlyFos022922(pRedFlp-Hgr)(slim[27801]::S000169_fly_pretag)::2XTY1-SGFP-V5-preTEV-BLRP-3XFLAGdFRT	2XTY1-SGFP-V5-preTEV-BLRP-3XFLAG	VK00033
1041	8882336809946705 H03	Adam	2014-02-12	Frank Schnorrer	FlyFos017066(pRedFlp-Hgr)(Adam[26840]::S000169_fly_pretag)::2XTY1-SGFP-V5-preTEV-BLRP-3XFLAGdFRT	2XTY1-SGFP-V5-preTEV-BLRP-3XFLAG	VK00033
1042	960688845280488 F03	exu	2014-02-13	Frank Schnorrer	FlyFos025463(pRedFlp-Hgr)(exu[25354]::S000169_fly_pretag)::2XTY1-SGFP-V5-preTEV-BLRP-3XFLAGdFRT	2XTY1-SGFP-V5-preTEV-BLRP-3XFLAG	VK00033
1043	9926817166096907 C04	Gl	2014-02-18	Frank Schnorrer	FlyFos022837(pRedFlp-Hgr)(Gl[24317]::S000169_fly_pretag)::2XTY1-SGFP-V5-preTEV-BLRP-3XFLAGdFRT	2XTY1-SGFP-V5-preTEV-BLRP-3XFLAG	VK00033
1044	14763769501329638 E04	TORC	2014-02-18	Frank Schnorrer	FlyFos015677(pRedFlp-Hgr)(TORC[24084]::S000169_fly_pretag)::2XTY1-SGFP-V5-preTEV-BLRP-3XFLAGdFRT	2XTY1-SGFP-V5-preTEV-BLRP-3XFLAG	VK00033
1045	2081450050271747 G07	mago	2014-02-25	Frank Schnorrer	FlyFos023625(pRedFlp-Hgr)(mago[26482]::S000169_fly_pretag)::2XTY1-SGFP-V5-preTEV-BLRP-3XFLAGdFRT	2XTY1-SGFP-V5-preTEV-BLRP-3XFLAG	VK00033
1046	6536462692990512 G05	Unc-89	2014-02-25	Frank Schnorrer	FlyFos025369(pRedFlp-Hgr)(Unc-89[18198]::S000169_fly_pretag)::2XTY1-SGFP-V5-preTEV-BLRP-3XFLAGdFRT	2XTY1-SGFP-V5-preTEV-BLRP-3XFLAG	VK00033
1051	7778023793434855 A06	HisCl1	2014-03-19	Vijay Raghavan	FlyFos020750(pRedFlp-Hgr)(HisCl1[14980]::2XTY1-SGFP-V5-preTEV-BLRP-3XFLAG)dFRT	2XTY1-SGFP-V5-preTEV-BLRP-3XFLAG	VK00002
1055	7778023793434855 B06	XNP	2014-03-19	Vijay Raghavan	FlyFos020753(pRedFlp-Hgr)(XNP[33910]::2XTY1-SGFP-V5-preTEV-BLRP-3XFLAG)dFRT	2XTY1-SGFP-V5-preTEV-BLRP-3XFLAG	VK00002
1059	7778023793434855 C01	cln3	2014-03-19	Vijay Raghavan	FlyFos019925(pRedFlp-Hgr)(cln3[27530]::2XTY1-SGFP-V5-preTEV-BLRP-3XFLAG)dFRT	2XTY1-SGFP-V5-preTEV-BLRP-3XFLAG	VK00002
1061	7778023793434855 C06	Dhap-at	2014-03-19	Vijay Raghavan	FlyFos020753(pRedFlp-Hgr)(Dhap-at[25562]::2XTY1-SGFP-V5-preTEV-BLRP-3XFLAG)dFRT	2XTY1-SGFP-V5-preTEV-BLRP-3XFLAG	VK00002
1063	7778023793434855 C08	CG10732	2014-03-19	Vijay Raghavan	FlyFos021088(pRedFlp-Hgr)(CG10732[22765]::2XTY1-SGFP-V5-preTEV-BLRP-3XFLAG)dFRT	2XTY1-SGFP-V5-preTEV-BLRP-3XFLAG	VK00002
1065	7778023793434855 D07	pen	2014-03-19	Vijay Raghavan	FlyFos020949(pRedFlp-Hgr)(pen[30475]::2XTY1-SGFP-V5-preTEV-BLRP-3XFLAG)dFRT	2XTY1-SGFP-V5-preTEV-BLRP-3XFLAG	VK00002
1069	7778023793434855 D10	CG14718	2014-03-19	Vijay Raghavan	FlyFos021607(pRedFlp-Hgr)(CG14718[20057]::2XTY1-SGFP-V5-preTEV-BLRP-3XFLAG)dFRT	2XTY1-SGFP-V5-preTEV-BLRP-3XFLAG	VK00002
1071	7778023793434855 D11	PP2A-B'	2014-03-19	Vijay Raghavan	FlyFos021729(pRedFlp-Hgr)(PP2A-B'[15675]::2XTY1-SGFP-V5-preTEV-BLRP-3XFLAG)dFRT	2XTY1-SGFP-V5-preTEV-BLRP-3XFLAG	VK00002
1073	7778023793434855 E02	spd-2	2014-03-19	Vijay Raghavan	FlyFos020075(pRedFlp-Hgr)(spd-2[26158]::2XTY1-SGFP-V5-preTEV-BLRP-3XFLAG)dFRT	2XTY1-SGFP-V5-preTEV-BLRP-3XFLAG	VK00002
1074	7778023793434855 E03	CG4408	2014-03-19	Vijay Raghavan	FlyFos020257(pRedFlp-Hgr)(CG4408[15975]::2XTY1-SGFP-V5-preTEV-BLRP-3XFLAG)dFRT	2XTY1-SGFP-V5-preTEV-BLRP-3XFLAG	VK00002
1079	7778023793434855 E10	Taf12	2014-03-19	Vijay Raghavan	FlyFos021607(pRedFlp-Hgr)(Taf12[43586]::2XTY1-SGFP-V5-preTEV-BLRP-3XFLAG)dFRT	2XTY1-SGFP-V5-preTEV-BLRP-3XFLAG	VK00002
1083	7778023793434855 E01	Yp1	2014-03-19	Vijay Raghavan	FlyFos019934(pRedFlp-Hgr)(Yp1[35321]::2XTY1-SGFP-V5-preTEV-BLRP-3XFLAG)dFRT	2XTY1-SGFP-V5-preTEV-BLRP-3XFLAG	VK00002
1085	7778023793434855 E11	CG8915	2014-03-19	Vijay Raghavan	FlyFos021743(pRedFlp-Hgr)(CG8915[20936]::2XTY1-SGFP-V5-preTEV-BLRP-3XFLAG)dFRT	2XTY1-SGFP-V5-preTEV-BLRP-3XFLAG	VK00002
1089	7778023793434855 F08	Fdh	2014-03-19	Vijay Raghavan	FlyFos021312(pRedFlp-Hgr)(Fdh[35061]::2XTY1-SGFP-V5-preTEV-BLRP-3XFLAG)dFRT	2XTY1-SGFP-V5-preTEV-BLRP-3XFLAG	VK00002
1090	7778023793434855 G06	Apc	2014-03-19	Vijay Raghavan	FlyFos020902(pRedFlp-Hgr)(Apc[19895]::2XTY1-SGFP-V5-preTEV-BLRP-3XFLAG)dFRT	2XTY1-SGFP-V5-preTEV-BLRP-3XFLAG	VK00002
1092	7778023793434855 G08	CG32495	2014-03-19	Vijay Raghavan	FlyFos021334(pRedFlp-Hgr)(CG32495[17041]::2XTY1-SGFP-V5-preTEV-BLRP-3XFLAG)dFRT	2XTY1-SGFP-V5-preTEV-BLRP-3XFLAG	VK00002
1096	7778023793434855 H01	CG4078	2014-03-19	Vijay Raghavan	FlyFos019983(pRedFlp-Hgr)(CG4078[27808]::2XTY1-SGFP-V5-preTEV-BLRP-3XFLAG)dFRT	2XTY1-SGFP-V5-preTEV-BLRP-3XFLAG	VK00002
1098	7778023793434855 H02	CG5840	2014-03-19	Vijay Raghavan	FlyFos020162(pRedFlp-Hgr)(CG5840[21672]::2XTY1-SGFP-V5-preTEV-BLRP-3XFLAG)dFRT	2XTY1-SGFP-V5-preTEV-BLRP-3XFLAG	VK00002
1105	17337204868928058 B08	RacGAP84C	2014-03-19	Vijay Raghavan	FlyFos022882(pRedFlp-Hgr)(RacGAP84C[35891]::2XTY1-SGFP-V5-preTEV-BLRP-3XFLAG)dFRT	2XTY1-SGFP-V5-preTEV-BLRP-3XFLAG	VK00002
1106	17337204868928058 C05	CG13001	2014-03-19	Vijay Raghavan	FlyFos022574(pRedFlp-Hgr)(CG13001[20862]::2XTY1-SGFP-V5-preTEV-BLRP-3XFLAG)dFRT	2XTY1-SGFP-V5-preTEV-BLRP-3XFLAG	VK00002
1110	17337204868928058 C12	CG7860	2014-03-20	Vijay Raghavan	FlyFos023370(pRedFlp-Hgr)(CG7860[17515]::2XTY1-SGFP-V5-preTEV-BLRP-3XFLAG)dFRT	2XTY1-SGFP-V5-preTEV-BLRP-3XFLAG	VK00002
1114	17337204868928058 D07	Coq2	2014-03-20	Vijay Raghavan	FlyFos022832(pRedFlp-Hgr)(Coq2[25136]::2XTY1-SGFP-V5-preTEV-BLRP-3XFLAG)dFRT	2XTY1-SGFP-V5-preTEV-BLRP-3XFLAG	VK00002
1116	17337204868928058 B03	Gap1	2014-03-20	Vijay Raghavan	FlyFos022403(pRedFlp-Hgr)(Gap1[18360]::2XTY1-SGFP-V5-preTEV-BLRP-3XFLAG)dFRT	2XTY1-SGFP-V5-preTEV-BLRP-3XFLAG	VK00002
1118	17337204868928058 C11	CG32138	2014-03-20	Vijay Raghavan	FlyFos023275(pRedFlp-Hgr)(CG32138[23845]::2XTY1-SGFP-V5-preTEV-BLRP-3XFLAG)dFRT	2XTY1-SGFP-V5-preTEV-BLRP-3XFLAG	VK00002
1120	7778023793434855 H09	phl	2014-03-20	Vijay Raghavan	FlyFos021552(pRedFlp-Hgr)(phl[18227]::2XTY1-SGFP-V5-preTEV-BLRP-3XFLAG)dFRT	2XTY1-SGFP-V5-preTEV-BLRP-3XFLAG	VK00002
1122	17337204868928058 B01	Hrd3	2014-03-20	Vijay Raghavan	FlyFos022007(pRedFlp-Hgr)(Hrd3[28217]::2XTY1-SGFP-V5-preTEV-BLRP-3XFLAG)dFRT	2XTY1-SGFP-V5-preTEV-BLRP-3XFLAG	VK00002
1124	17337204868928058 D02	scu	2014-03-20	Vijay Raghavan	FlyFos022329(pRedFlp-Hgr)(scu[20178]::2XTY1-SGFP-V5-preTEV-BLRP-3XFLAG)dFRT	2XTY1-SGFP-V5-preTEV-BLRP-3XFLAG	VK00002
1126	17337204868928058 D09	CG11899	2014-03-20	Vijay Raghavan	FlyFos022998(pRedFlp-Hgr)(CG11899[19771]::2XTY1-SGFP-V5-preTEV-BLRP-3XFLAG)dFRT	2XTY1-SGFP-V5-preTEV-BLRP-3XFLAG	VK00002
1128	9854504803824267 G08	cin	2014-03-20	Vijay Raghavan	FlyFos028468(pRedFlp-Hgr)(cin[29616]::2XTY1-SGFP-V5-preTEV-BLRP-3XFLAG)dFRT	2XTY1-SGFP-V5-preTEV-BLRP-3XFLAG	VK00002
1130	7778023793434855 F02	Rm62	2014-03-20	Vijay Raghavan	FlyFos020089(pRedFlp-Hgr)(Rm62[15999]::2XTY1-SGFP-V5-preTEV-BLRP-3XFLAG)dFRT	2XTY1-SGFP-V5-preTEV-BLRP-3XFLAG	VK00002
1132	17337204868928058 D10	CG1316	2014-03-20	Vijay Raghavan	FlyFos023070(pRedFlp-Hgr)(CG1316[15640]::2XTY1-SGFP-V5-preTEV-BLRP-3XFLAG)dFRT	2XTY1-SGFP-V5-preTEV-BLRP-3XFLAG	VK00002
1134	17337204868928058 B07	eIF4AIII	2014-03-20	Vijay Raghavan	FlyFos022832(pRedFlp-Hgr)(eIF4AIII[25582]::2XTY1-SGFP-V5-preTEV-BLRP-3XFLAG)dFRT	2XTY1-SGFP-V5-preTEV-BLRP-3XFLAG	VK00002
1136	17337204868928058 A10	Ahcy13	2014-03-20	Vijay Raghavan	FlyFos023041(pRedFlp-Hgr)(Ahcy13[36047]::2XTY1-SGFP-V5-preTEV-BLRP-3XFLAG)dFRT	2XTY1-SGFP-V5-preTEV-BLRP-3XFLAG	VK00002
1140	17337204868928058 A04	Ddx1	2014-03-20	Vijay Raghavan	FlyFos022434(pRedFlp-Hgr)(Ddx1[20318]::2XTY1-SGFP-V5-preTEV-BLRP-3XFLAG)dFRT	2XTY1-SGFP-V5-preTEV-BLRP-3XFLAG	VK00002
1143	1708059145882148 C10	DIP2	2014-03-20	Vijay Raghavan	FlyFos015853(pRedFlp-Hgr)(DIP2[33912]::2XTY1-SGFP-V5-preTEV-BLRP-3XFLAG)dFRT	2XTY1-SGFP-V5-preTEV-BLRP-3XFLAG	VK00002
1145	17337204868928058 G03	Hpr1	2014-03-20	Vijay Raghavan	FlyFos022422(pRedFlp-Hgr)(Hpr1[41753]::2XTY1-SGFP-V5-preTEV-BLRP-3XFLAG)dFRT	2XTY1-SGFP-V5-preTEV-BLRP-3XFLAG	VK00002
1147	17337204868928058 F03	CG5808	2014-03-20	Vijay Raghavan	FlyFos022419(pRedFlp-Hgr)(CG5808[31650]::2XTY1-SGFP-V5-preTEV-BLRP-3XFLAG)dFRT	2XTY1-SGFP-V5-preTEV-BLRP-3XFLAG	VK00002
1149	8921672467940407 C03	CG3376	2014-03-20	Vijay Raghavan	FlyFos018210(pRedFlp-Hgr)(CG3376[20563]::2XTY1-SGFP-V5-preTEV-BLRP-3XFLAG)dFRT	2XTY1-SGFP-V5-preTEV-BLRP-3XFLAG	VK00033
1153	8921672467940407 E04	CG3964	2014-03-20	Vijay Raghavan	FlyFos018471(pRedFlp-Hgr)(CG3964[32148]::2XTY1-SGFP-V5-preTEV-BLRP-3XFLAG)dFRT	2XTY1-SGFP-V5-preTEV-BLRP-3XFLAG	VK00033
1155	8921672467940407 C06	Cirl	2014-03-20	Vijay Raghavan	FlyFos018750(pRedFlp-Hgr)(Cirl[37976]::2XTY1-SGFP-V5-preTEV-BLRP-3XFLAG)dFRT	2XTY1-SGFP-V5-preTEV-BLRP-3XFLAG	VK00033
1156	8921672467940407 D04	CG9350	2014-03-20	Vijay Raghavan	FlyFos018466(pRedFlp-Hgr)(CG9350[16011]::2XTY1-SGFP-V5-preTEV-BLRP-3XFLAG)dFRT	2XTY1-SGFP-V5-preTEV-BLRP-3XFLAG	VK00033
1158	8921672467940407 D06	Sans	2014-03-20	Vijay Raghavan	FlyFos018774(pRedFlp-Hgr)(Sans[34742]::2XTY1-SGFP-V5-preTEV-BLRP-3XFLAG)dFRT	2XTY1-SGFP-V5-preTEV-BLRP-3XFLAG	VK00033
1160	8921672467940407 D05	CG9346	2014-03-20	Vijay Raghavan	FlyFos018626(pRedFlp-Hgr)(CG9346[19353]::2XTY1-SGFP-V5-preTEV-BLRP-3XFLAG)dFRT	2XTY1-SGFP-V5-preTEV-BLRP-3XFLAG	VK00033
1162	8921672467940407 E11	CG13996	2014-03-20	Vijay Raghavan	FlyFos019617(pRedFlp-Hgr)(CG13996[27077]::2XTY1-SGFP-V5-preTEV-BLRP-3XFLAG)dFRT	2XTY1-SGFP-V5-preTEV-BLRP-3XFLAG	VK00033
1164	8921672467940407 G07	G-salpha60A	2014-03-20	Vijay Raghavan	FlyFos019023(pRedFlp-Hgr)(G-salpha60A[19842]::2XTY1-SGFP-V5-preTEV-BLRP-3XFLAG)dFRT	2XTY1-SGFP-V5-preTEV-BLRP-3XFLAG	VK00033
1166	8921672467940407 F06	CG8778	2014-03-20	Vijay Raghavan	FlyFos018814(pRedFlp-Hgr)(CG8778[19509]::2XTY1-SGFP-V5-preTEV-BLRP-3XFLAG)dFRT	2XTY1-SGFP-V5-preTEV-BLRP-3XFLAG	VK00033
1168	8921672467940407 F12	CG3927	2014-03-20	Vijay Raghavan	FlyFos019769(pRedFlp-Hgr)(CG3927[22742]::2XTY1-SGFP-V5-preTEV-BLRP-3XFLAG)dFRT	2XTY1-SGFP-V5-preTEV-BLRP-3XFLAG	VK00033
1169	8921672467940407 F11	CG9098	2014-03-20	Vijay Raghavan	FlyFos019617(pRedFlp-Hgr)(CG9098[40836]::2XTY1-SGFP-V5-preTEV-BLRP-3XFLAG)dFRT	2XTY1-SGFP-V5-preTEV-BLRP-3XFLAG	VK00033
1170	8921672467940407 G08	eIF-4a	2014-03-20	Vijay Raghavan	FlyFos019206(pRedFlp-Hgr)(eIF-4a[24938]::2XTY1-SGFP-V5-preTEV-BLRP-3XFLAG)dFRT	2XTY1-SGFP-V5-preTEV-BLRP-3XFLAG	VK00033
1172	8921672467940407 G04	GlyP	2014-03-20	Vijay Raghavan	FlyFos018549(pRedFlp-Hgr)(GlyP[35796]::2XTY1-SGFP-V5-preTEV-BLRP-3XFLAG)dFRT	2XTY1-SGFP-V5-preTEV-BLRP-3XFLAG	VK00033
1174	17337204868928058 F12	TyrRII	2014-03-25	Vijay Raghavan	FlyFos023482(pRedFlp-Hgr)(TyrRII[39407]::2XTY1-SGFP-V5-preTEV-BLRP-3XFLAG)dFRT	2XTY1-SGFP-V5-preTEV-BLRP-3XFLAG	VK00002
1176	17337204868928058 G10	CG33229	2014-03-25	Vijay Raghavan	FlyFos023140(pRedFlp-Hgr)(CG33229[30525]::2XTY1-SGFP-V5-preTEV-BLRP-3XFLAG)dFRT	2XTY1-SGFP-V5-preTEV-BLRP-3XFLAG	VK00002
1178	17337204868928058 H02	Cbl	2014-03-26	Vijay Raghavan	FlyFos022370(pRedFlp-Hgr)(Cbl[27838]::2XTY1-SGFP-V5-preTEV-BLRP-3XFLAG)dFRT	2XTY1-SGFP-V5-preTEV-BLRP-3XFLAG	VK00002
1180	17337204868928058 G11	Shc	2014-03-26	Vijay Raghavan	FlyFos023303(pRedFlp-Hgr)(Shc[26787]::2XTY1-SGFP-V5-preTEV-BLRP-3XFLAG)dFRT	2XTY1-SGFP-V5-preTEV-BLRP-3XFLAG	VK00002
1182	8921672467940407 C11	Axn	2014-03-26	Vijay Raghavan	FlyFos019606(pRedFlp-Hgr)(Axn[15172]::2XTY1-SGFP-V5-preTEV-BLRP-3XFLAG)dFRT	2XTY1-SGFP-V5-preTEV-BLRP-3XFLAG	VK00002
1184	8921672467940407 E07	CG11509	2014-03-26	Vijay Raghavan	FlyFos018989(pRedFlp-Hgr)(CG11509[23075]::2XTY1-SGFP-V5-preTEV-BLRP-3XFLAG)dFRT	2XTY1-SGFP-V5-preTEV-BLRP-3XFLAG	VK00002
1186	17337204868928058 F06	iPLA2-VIA	2014-03-26	Vijay Raghavan	FlyFos022742(pRedFlp-Hgr)(iPLA2-VIA[38160]::2XTY1-SGFP-V5-preTEV-BLRP-3XFLAG)dFRT	2XTY1-SGFP-V5-preTEV-BLRP-3XFLAG	VK00002
1187	8921672467940407 F08	CG14230	2014-03-26	Vijay Raghavan	FlyFos019190(pRedFlp-Hgr)(CG14230[34930]::2XTY1-SGFP-V5-preTEV-BLRP-3XFLAG)dFRT	2XTY1-SGFP-V5-preTEV-BLRP-3XFLAG	VK00002
1189	8921672467940407 D03	Ect3	2014-03-26	Vijay Raghavan	FlyFos018218(pRedFlp-Hgr)(Ect3[33429]::2XTY1-SGFP-V5-preTEV-BLRP-3XFLAG)dFRT	2XTY1-SGFP-V5-preTEV-BLRP-3XFLAG	VK00002
1193	17337204868928058 G12	alphaCop	2014-03-26	Vijay Raghavan	FlyFos023489(pRedFlp-Hgr)(alphaCop[25764]::2XTY1-SGFP-V5-preTEV-BLRP-3XFLAG)dFRT	2XTY1-SGFP-V5-preTEV-BLRP-3XFLAG	VK00002
1195	8921672467940407 D09	CG11164	2014-03-26	Vijay Raghavan	FlyFos019241(pRedFlp-Hgr)(CG11164[30414]::2XTY1-SGFP-V5-preTEV-BLRP-3XFLAG)dFRT	2XTY1-SGFP-V5-preTEV-BLRP-3XFLAG	VK00002
1197	8921672467940407 F02	Tak1	2014-03-26	Vijay Raghavan	FlyFos018178(pRedFlp-Hgr)(Tak1[14876]::2XTY1-SGFP-V5-preTEV-BLRP-3XFLAG)dFRT	2XTY1-SGFP-V5-preTEV-BLRP-3XFLAG	VK00002
1199	8921672467940407 H02	CG14628	2014-03-28	Vijay Raghavan	FlyFos018200(pRedFlp-Hgr)(CG14628[20711]::2XTY1-SGFP-V5-preTEV-BLRP-3XFLAG)dFRT	2XTY1-SGFP-V5-preTEV-BLRP-3XFLAG	VK00002
1201	8921672467940407 E09	Lig4	2014-03-28	Vijay Raghavan	FlyFos019241(pRedFlp-Hgr)(Lig4[34794]::2XTY1-SGFP-V5-preTEV-BLRP-3XFLAG)dFRT	2XTY1-SGFP-V5-preTEV-BLRP-3XFLAG	VK00002
1202	8921672467940407 E03	CG15923	2014-03-28	Vijay Raghavan	FlyFos018281(pRedFlp-Hgr)(CG15923[23651]::2XTY1-SGFP-V5-preTEV-BLRP-3XFLAG)dFRT	2XTY1-SGFP-V5-preTEV-BLRP-3XFLAG	VK00002
1204	8921672467940407 G03	CG32512	2014-03-28	Vijay Raghavan	FlyFos018292(pRedFlp-Hgr)(CG32512[33530]::2XTY1-SGFP-V5-preTEV-BLRP-3XFLAG)dFRT	2XTY1-SGFP-V5-preTEV-BLRP-3XFLAG	VK00002
1212	17337204868928058 F07	RagA	2014-04-01	Vijay Raghavan	FlyFos022846(pRedFlp-Hgr)(RagA[29317]::2XTY1-SGFP-V5-preTEV-BLRP-3XFLAG)dFRT	2XTY1-SGFP-V5-preTEV-BLRP-3XFLAG	VK00002
1214	17337204868928058 E11	bnb	2014-04-01	Vijay Raghavan	FlyFos023285(pRedFlp-Hgr)(bnb[27097]::2XTY1-SGFP-V5-preTEV-BLRP-3XFLAG)dFRT	2XTY1-SGFP-V5-preTEV-BLRP-3XFLAG	VK00002
1215	17337204868928058 F01	CG17819	2014-04-01	Vijay Raghavan	FlyFos022198(pRedFlp-Hgr)(CG17819[37651]::2XTY1-SGFP-V5-preTEV-BLRP-3XFLAG)dFRT	2XTY1-SGFP-V5-preTEV-BLRP-3XFLAG	VK00002
1217	17337204868928058 E03	Saf-B	2014-04-01	Vijay Raghavan	FlyFos022419(pRedFlp-Hgr)(Saf-B[24418]::2XTY1-SGFP-V5-preTEV-BLRP-3XFLAG)dFRT	2XTY1-SGFP-V5-preTEV-BLRP-3XFLAG	VK00002
1219	17337204868928058 E09	CG10841	2014-04-01	Vijay Raghavan	FlyFos023005(pRedFlp-Hgr)(CG10841[27613]::2XTY1-SGFP-V5-preTEV-BLRP-3XFLAG)dFRT	2XTY1-SGFP-V5-preTEV-BLRP-3XFLAG	VK00002
1221	17337204868928058 C07	Gfr	2014-04-01	Vijay Raghavan	FlyFos022832(pRedFlp-Hgr)(Gfr[37491]::2XTY1-SGFP-V5-preTEV-BLRP-3XFLAG)dFRT	2XTY1-SGFP-V5-preTEV-BLRP-3XFLAG	VK00002
1223	17337204868928058 E10	CG11586	2014-04-01	Vijay Raghavan	FlyFos023070(pRedFlp-Hgr)(CG11586[39830]::2XTY1-SGFP-V5-preTEV-BLRP-3XFLAG)dFRT	2XTY1-SGFP-V5-preTEV-BLRP-3XFLAG	VK00002
1225	17337204868928058 E06	Hlc	2014-04-01	Vijay Raghavan	FlyFos022730(pRedFlp-Hgr)(Hlc[23773]::2XTY1-SGFP-V5-preTEV-BLRP-3XFLAG)dFRT	2XTY1-SGFP-V5-preTEV-BLRP-3XFLAG	VK00002
1227	17337204868928058 E04	CG2931	2014-04-01	Vijay Raghavan	FlyFos022484(pRedFlp-Hgr)(CG2931[30877]::2XTY1-SGFP-V5-preTEV-BLRP-3XFLAG)dFRT	2XTY1-SGFP-V5-preTEV-BLRP-3XFLAG	VK00002
1229	17337204868928058 E02	Fuca	2014-04-01	Vijay Raghavan	FlyFos022336(pRedFlp-Hgr)(Fuca[36456]::2XTY1-SGFP-V5-preTEV-BLRP-3XFLAG)dFRT	2XTY1-SGFP-V5-preTEV-BLRP-3XFLAG	VK00002
1231	1582528031925018 F10	net	2014-04-01	Vijay Raghavan	FlyFos027783(pRedFlp-Hgr)(net[28717]::2XTY1-SGFP-V5-preTEV-BLRP-3XFLAG)dFRT	2XTY1-SGFP-V5-preTEV-BLRP-3XFLAG	VK00033
1233	014526891357111271 A09	CG4901	2014-04-01	Vijay Raghavan	FlyFos029378(pRedFlp-Hgr)(CG4901[35646]::2XTY1-SGFP-V5-preTEV-BLRP-3XFLAG)dFRT	2XTY1-SGFP-V5-preTEV-BLRP-3XFLAG	VK00033
1235	014526891357111271 B10	CG12701	2014-04-01	Vijay Raghavan	FlyFos029575(pRedFlp-Hgr)(CG12701[16430]::2XTY1-SGFP-V5-preTEV-BLRP-3XFLAG)dFRT	2XTY1-SGFP-V5-preTEV-BLRP-3XFLAG	VK00033
1237	014526891357111271 E09	Cp7Fc	2014-04-01	Vijay Raghavan	FlyFos029388(pRedFlp-Hgr)(Cp7Fc[29382]::2XTY1-SGFP-V5-preTEV-BLRP-3XFLAG)dFRT	2XTY1-SGFP-V5-preTEV-BLRP-3XFLAG	VK00033
1240	014526891357111271 G08	CG10431	2014-04-01	Vijay Raghavan	FlyFos029401(pRedFlp-Hgr)(CG10431[31917]::2XTY1-SGFP-V5-preTEV-BLRP-3XFLAG)dFRT	2XTY1-SGFP-V5-preTEV-BLRP-3XFLAG	VK00033
1242	014526891357111271 H09	CG18132	2014-04-01	Vijay Raghavan	FlyFos029497(pRedFlp-Hgr)(CG18132[22139]::2XTY1-SGFP-V5-preTEV-BLRP-3XFLAG)dFRT	2XTY1-SGFP-V5-preTEV-BLRP-3XFLAG	VK00033
1244	6196214900843875 A09	Rhp	2014-04-01	Vijay Raghavan	FlyFos031350(pRedFlp-Hgr)(Rhp[23549]::2XTY1-SGFP-V5-preTEV-BLRP-3XFLAG)dFRT	2XTY1-SGFP-V5-preTEV-BLRP-3XFLAG	VK00033
1246	6196214900843875 B11	CG6509	2014-04-01	Vijay Raghavan	FlyFos031718(pRedFlp-Hgr)(CG6509[34874]::2XTY1-SGFP-V5-preTEV-BLRP-3XFLAG)dFRT	2XTY1-SGFP-V5-preTEV-BLRP-3XFLAG	VK00033
1248	6196214900843875 G12	cnk	2014-04-01	Vijay Raghavan	FlyFos031897(pRedFlp-Hgr)(cnk[33649]::2XTY1-SGFP-V5-preTEV-BLRP-3XFLAG)dFRT	2XTY1-SGFP-V5-preTEV-BLRP-3XFLAG	VK00033
1250	6196214900843875 C02	CG9817	2014-04-01	Vijay Raghavan	FlyFos030279(pRedFlp-Hgr)(CG9817[14617]::2XTY1-SGFP-V5-preTEV-BLRP-3XFLAG)dFRT	2XTY1-SGFP-V5-preTEV-BLRP-3XFLAG	VK00033
1252	6196214900843875 C06	ATbp	2014-04-01	Vijay Raghavan	FlyFos031009(pRedFlp-Hgr)(ATbp[14120]::2XTY1-SGFP-V5-preTEV-BLRP-3XFLAG)dFRT	2XTY1-SGFP-V5-preTEV-BLRP-3XFLAG	VK00033
1253	6196214900843875 D01	rap	2014-04-01	Vijay Raghavan	FlyFos030064(pRedFlp-Hgr)(rap[23555]::2XTY1-SGFP-V5-preTEV-BLRP-3XFLAG)dFRT	2XTY1-SGFP-V5-preTEV-BLRP-3XFLAG	VK00033
1255	6196214900843875 D08	y	2014-04-01	Vijay Raghavan	FlyFos031261(pRedFlp-Hgr)(y[37489]::2XTY1-SGFP-V5-preTEV-BLRP-3XFLAG)dFRT	2XTY1-SGFP-V5-preTEV-BLRP-3XFLAG	VK00033
1256	6196214900843875 D10	CG4136	2014-04-01	Vijay Raghavan	FlyFos031656(pRedFlp-Hgr)(CG4136[43174]::2XTY1-SGFP-V5-preTEV-BLRP-3XFLAG)dFRT	2XTY1-SGFP-V5-preTEV-BLRP-3XFLAG	VK00033
1257	8332520144274483 C10	TpnC25D	2014-04-04	Frank Schnorrer	FlyFos022083(pRedFlp-Hgr)(TpnC25D[23511]::S000169_fly_pretag)::2XTY1-SGFP-V5-preTEV-BLRP-3XFLAGdFRT	2XTY1-SGFP-V5-preTEV-BLRP-3XFLAG	VK00033
1258	7409496615490294 H04	cta	2014-04-07	Frank Schnorrer	FlyFos028271(pRedFlp-Hgr)(cta[22241]::S000169_fly_pretag)::2XTY1-SGFP-V5-preTEV-BLRP-3XFLAGdFRT	2XTY1-SGFP-V5-preTEV-BLRP-3XFLAG	VK00033
1259	14763769501329638 C12	Sec16	2014-04-11	Frank Schnorrer	FlyFos015755(pRedFlp-Hgr)(Sec16[43046]::S000169_fly_pretag)::2XTY1-SGFP-V5-preTEV-BLRP-3XFLAGdFRT	2XTY1-SGFP-V5-preTEV-BLRP-3XFLAG	VK00033
1260	14763769501329638 A05	RhoGAP5A	2014-04-11	Frank Schnorrer	FlyFos015682(pRedFlp-Hgr)(RhoGAP5A[14109]::S000169_fly_pretag)::2XTY1-SGFP-V5-preTEV-BLRP-3XFLAGdFRT	2XTY1-SGFP-V5-preTEV-BLRP-3XFLAG	VK00033
1261	05512796956240418 H05	gd	2014-04-11	Frank Schnorrer	FlyFos016881(pRedFlp-Hgr)(gd[36666]::S000169_fly_pretag)::2XTY1-SGFP-V5-preTEV-BLRP-3XFLAGdFRT	2XTY1-SGFP-V5-preTEV-BLRP-3XFLAG	VK00033
1262	40769561157921497 E10	Sec22	2014-04-14	Frank Schnorrer	FlyFos017756(pRedFlp-Hgr)(Sec22[22582]::S000169_fly_pretag)::2XTY1-SGFP-V5-preTEV-BLRP-3XFLAGdFRT	2XTY1-SGFP-V5-preTEV-BLRP-3XFLAG	VK00033
1263	4670353289678594 G01	slam	2014-04-14	Frank Schnorrer	FlyFos016068(pRedFlp-Hgr)(slam[30836]::S000169_fly_pretag)::2XTY1-SGFP-V5-preTEV-BLRP-3XFLAGdFRT	2XTY1-SGFP-V5-preTEV-BLRP-3XFLAG	VK00033
1264	8137439615386962_ E08	BicC	2014-04-14	Frank Schnorrer	FlyFos021395(pRedFlp-Hgr)(BicC[13801]::S000169_fly_pretag)::2XTY1-SGFP-V5-preTEV-BLRP-3XFLAGdFRT	2XTY1-SGFP-V5-preTEV-BLRP-3XFLAG	VK00033
1266	8921672467940407 G11	CG9109	2014-04-21	Vijay Raghavan	FlyFos019646(pRedFlp-Hgr)(CG9109[17440]::2XTY1-SGFP-V5-preTEV-BLRP-3XFLAG)dFRT	2XTY1-SGFP-V5-preTEV-BLRP-3XFLAG	VK00033
1268	7778023793434855 D03	Acn	2014-04-21	Vijay Raghavan	FlyFos020238(pRedFlp-Hgr)(Acn[23480]::2XTY1-SGFP-V5-preTEV-BLRP-3XFLAG)dFRT	2XTY1-SGFP-V5-preTEV-BLRP-3XFLAG	VK00033
1270	8921672467940407 H09	ave	2014-04-21	Vijay Raghavan	FlyFos019401(pRedFlp-Hgr)(ave[19732]::2XTY1-SGFP-V5-preTEV-BLRP-3XFLAG)dFRT	2XTY1-SGFP-V5-preTEV-BLRP-3XFLAG	VK00033
1272	7778023793434855 A09	BicC	2014-04-21	Vijay Raghavan	FlyFos021395(pRedFlp-Hgr)(BicC[13801]::2XTY1-SGFP-V5-preTEV-BLRP-3XFLAG)dFRT	2XTY1-SGFP-V5-preTEV-BLRP-3XFLAG	VK00033
1274	8921672467940407 H08	ifc	2014-04-21	Vijay Raghavan	FlyFos019206(pRedFlp-Hgr)(ifc[27951]::2XTY1-SGFP-V5-preTEV-BLRP-3XFLAG)dFRT	2XTY1-SGFP-V5-preTEV-BLRP-3XFLAG	VK00033
1276	8921672467940407 G12	crb	2014-04-21	Vijay Raghavan	FlyFos019790(pRedFlp-Hgr)(crb[16014]::2XTY1-SGFP-V5-preTEV-BLRP-3XFLAG)dFRT	2XTY1-SGFP-V5-preTEV-BLRP-3XFLAG	VK00002
1277	232244532180216 G10	rho-6	2014-04-22	Frank Schnorrer	FlyFos030512(pRedFlp-Hgr)(rho-6[17103]::S000169_fly_pretag)::2XTY1-SGFP-V5-preTEV-BLRP-3XFLAGdFRT	2XTY1-SGFP-V5-preTEV-BLRP-3XFLAG	VK00033
1278	3294706831667914 A04	Tango2	2014-04-22	Frank Schnorrer	FlyFos019018(pRedFlp-Hgr)(Tango2[42216]::S000169_fly_pretag)::2XTY1-SGFP-V5-preTEV-BLRP-3XFLAGdFRT	2XTY1-SGFP-V5-preTEV-BLRP-3XFLAG	VK00033
1279	8689038524324187 E02	Tango5	2014-04-22	Frank Schnorrer	FlyFos018413(pRedFlp-Hgr)(Tango5[24044]::S000169_fly_pretag)::2XTY1-SGFP-V5-preTEV-BLRP-3XFLAGdFRT	2XTY1-SGFP-V5-preTEV-BLRP-3XFLAG	VK00033
1280	1957857699873523 A08	RhoGAP15B	2014-04-23	Frank Schnorrer	FlyFos016474(pRedFlp-Hgr)(RhoGAP15B[36629]::S000169_fly_pretag)::2XTY1-SGFP-V5-preTEV-BLRP-3XFLAGdFRT	2XTY1-SGFP-V5-preTEV-BLRP-3XFLAG	VK00033
1281	17337204868928058 A09	inaE	2014-04-23	Frank Schnorrer	FlyFos022992(pRedFlp-Hgr)(inaE[42832]::2XTY1-SGFP-V5-preTEV-BLRP-3XFLAG)dFRT	2XTY1-SGFP-V5-preTEV-BLRP-3XFLAG	VK00033
1282	4643186102601031 F12	CBP	2014-04-24	Frank Schnorrer	FlyFos021366(pRedFlp-Hgr)(CBP[35972]::S000169_fly_pretag)::2XTY1-SGFP-V5-preTEV-BLRP-3XFLAGdFRT	2XTY1-SGFP-V5-preTEV-BLRP-3XFLAG	VK00033
1283	6581804864395902 E07	Tango10	2014-04-24	Frank Schnorrer	FlyFos030389(pRedFlp-Hgr)(Tango10[15481]::S000169_fly_pretag)::2XTY1-SGFP-V5-preTEV-BLRP-3XFLAGdFRT	2XTY1-SGFP-V5-preTEV-BLRP-3XFLAG	VK00033
1284	2390887516546718 F04	RhoGAP16F	2014-04-24	Frank Schnorrer	FlyFos022329(pRedFlp-Hgr)(RhoGAP16F[16011]::S000169_fly_pretag)::2XTY1-SGFP-V5-preTEV-BLRP-3XFLAGdFRT	2XTY1-SGFP-V5-preTEV-BLRP-3XFLAG	VK00033
1287	7778023793434855 E08	swm	2014-04-30	Vijay Raghavan	FlyFos021165(pRedFlp-Hgr)(swm[35407]::2XTY1-SGFP-V5-preTEV-BLRP-3XFLAG)dFRT	2XTY1-SGFP-V5-preTEV-BLRP-3XFLAG	VK00033
1289	7778023793434855 G02	CG1882	2014-04-30	Vijay Raghavan	FlyFos020152(pRedFlp-Hgr)(CG1882[14091]::2XTY1-SGFP-V5-preTEV-BLRP-3XFLAG)dFRT	2XTY1-SGFP-V5-preTEV-BLRP-3XFLAG	VK00033
1291	7778023793434855 H06	borr	2014-04-30	Vijay Raghavan	FlyFos020910(pRedFlp-Hgr)(borr[36547]::2XTY1-SGFP-V5-preTEV-BLRP-3XFLAG)dFRT	2XTY1-SGFP-V5-preTEV-BLRP-3XFLAG	VK00033
1293	7778023793434855 A11	CG12140	2014-04-30	Vijay Raghavan	FlyFos021666(pRedFlp-Hgr)(CG12140[16710]::2XTY1-SGFP-V5-preTEV-BLRP-3XFLAG)dFRT	2XTY1-SGFP-V5-preTEV-BLRP-3XFLAG	VK00033
1295	7778023793434855 G03	CG3732	2014-04-30	Vijay Raghavan	FlyFos020330(pRedFlp-Hgr)(CG3732[25241]::2XTY1-SGFP-V5-preTEV-BLRP-3XFLAG)dFRT	2XTY1-SGFP-V5-preTEV-BLRP-3XFLAG	VK00033
1296	7778023793434855 B10	l(2)not	2014-04-30	Vijay Raghavan	FlyFos021579(pRedFlp-Hgr)(l(2)not[21849]::2XTY1-SGFP-V5-preTEV-BLRP-3XFLAG)dFRT	2XTY1-SGFP-V5-preTEV-BLRP-3XFLAG	VK00033
1298	7778023793434855 C03	CG10470	2014-04-30	Vijay Raghavan	FlyFos020238(pRedFlp-Hgr)(CG10470[21742]::2XTY1-SGFP-V5-preTEV-BLRP-3XFLAG)dFRT	2XTY1-SGFP-V5-preTEV-BLRP-3XFLAG	VK00033
1299	7778023793434855 C09	5-HT1B	2014-04-30	Vijay Raghavan	FlyFos021423(pRedFlp-Hgr)(5-HT1B[39597]::2XTY1-SGFP-V5-preTEV-BLRP-3XFLAG)dFRT	2XTY1-SGFP-V5-preTEV-BLRP-3XFLAG	VK00033
1300	7778023793434855 D09	CG10641	2014-04-30	Vijay Raghavan	FlyFos021457(pRedFlp-Hgr)(CG10641[20685]::2XTY1-SGFP-V5-preTEV-BLRP-3XFLAG)dFRT	2XTY1-SGFP-V5-preTEV-BLRP-3XFLAG	VK00033
1304	17337204868928058 A02	CG15440	2014-04-30	Vijay Raghavan	FlyFos022243(pRedFlp-Hgr)(CG15440[31987]::2XTY1-SGFP-V5-preTEV-BLRP-3XFLAG)dFRT	2XTY1-SGFP-V5-preTEV-BLRP-3XFLAG	VK00033
1308	17337204868928058 A05	Vha44	2014-04-30	Vijay Raghavan	FlyFos022526(pRedFlp-Hgr)(Vha44[34381]::2XTY1-SGFP-V5-preTEV-BLRP-3XFLAG)dFRT	2XTY1-SGFP-V5-preTEV-BLRP-3XFLAG	VK00033
1312	7778023793434855 H10	mre11	2014-04-30	Vijay Raghavan	FlyFos021656(pRedFlp-Hgr)(mre11[16798]::2XTY1-SGFP-V5-preTEV-BLRP-3XFLAG)dFRT	2XTY1-SGFP-V5-preTEV-BLRP-3XFLAG	VK00033
1317	17337204868928058 D04	CG42585	2014-04-30	Vijay Raghavan	FlyFos022479(pRedFlp-Hgr)(CG42585[18939]::2XTY1-SGFP-V5-preTEV-BLRP-3XFLAG)dFRT	2XTY1-SGFP-V5-preTEV-BLRP-3XFLAG	VK00033
1319	17337204868928058 D05	DAT	2014-04-30	Vijay Raghavan	FlyFos022602(pRedFlp-Hgr)(DAT[21273]::2XTY1-SGFP-V5-preTEV-BLRP-3XFLAG)dFRT	2XTY1-SGFP-V5-preTEV-BLRP-3XFLAG	VK00033
1321	17337204868928058 D08	l(2)gd1	2014-04-30	Vijay Raghavan	FlyFos022915(pRedFlp-Hgr)(l(2)gd1[17697]::2XTY1-SGFP-V5-preTEV-BLRP-3XFLAG)dFRT	2XTY1-SGFP-V5-preTEV-BLRP-3XFLAG	VK00033
1323	17337204868928058 D11	RpS15Ab	2014-04-30	Vijay Raghavan	FlyFos023277(pRedFlp-Hgr)(RpS15Ab[41486]::2XTY1-SGFP-V5-preTEV-BLRP-3XFLAG)dFRT	2XTY1-SGFP-V5-preTEV-BLRP-3XFLAG	VK00033
1324	17337204868928058 E01	CG17082	2014-04-30	Vijay Raghavan	FlyFos022127(pRedFlp-Hgr)(CG17082[24499]::2XTY1-SGFP-V5-preTEV-BLRP-3XFLAG)dFRT	2XTY1-SGFP-V5-preTEV-BLRP-3XFLAG	VK00033
1325	17337204868928058 F04	CG3165	2014-04-30	Vijay Raghavan	FlyFos022513(pRedFlp-Hgr)(CG3165[31050]::2XTY1-SGFP-V5-preTEV-BLRP-3XFLAG)dFRT	2XTY1-SGFP-V5-preTEV-BLRP-3XFLAG	VK00033
1327	17337204868928058 F08	Prp19	2014-04-30	Vijay Raghavan	FlyFos022922(pRedFlp-Hgr)(Prp19[30489]::2XTY1-SGFP-V5-preTEV-BLRP-3XFLAG)dFRT	2XTY1-SGFP-V5-preTEV-BLRP-3XFLAG	VK00033
1329	17337204868928058 G07	kek1	2014-04-30	Vijay Raghavan	FlyFos022859(pRedFlp-Hgr)(kek1[19714]::2XTY1-SGFP-V5-preTEV-BLRP-3XFLAG)dFRT	2XTY1-SGFP-V5-preTEV-BLRP-3XFLAG	VK00033
1331	17337204868928058 H06	CG5210	2014-04-30	Vijay Raghavan	FlyFos022798(pRedFlp-Hgr)(CG5210[39057]::2XTY1-SGFP-V5-preTEV-BLRP-3XFLAG)dFRT	2XTY1-SGFP-V5-preTEV-BLRP-3XFLAG	VK00033
1332	17337204868928058 H12	5-HT2	2014-04-30	Vijay Raghavan	FlyFos023491(pRedFlp-Hgr)(5-HT2[16079]::2XTY1-SGFP-V5-preTEV-BLRP-3XFLAG)dFRT	2XTY1-SGFP-V5-preTEV-BLRP-3XFLAG	VK00002
1334	7778023793434855 C02	CG8405	2014-05-06	Vijay Raghavan	FlyFos020004(pRedFlp-Hgr)(CG8405[22653]::2XTY1-SGFP-V5-preTEV-BLRP-3XFLAG)dFRT	2XTY1-SGFP-V5-preTEV-BLRP-3XFLAG	VK00033
1337	4250812018080269 C08	Sec61alpha	2014-06-10	Frank Schnorrer	FlyFos028978(pRedFlp-Hgr)(Sec61alpha[19486]::S000169_fly_pretag)::2XTY1-SGFP-V5-preTEV-BLRP-3XFLAGdFRT	2XTY1-SGFP-V5-preTEV-BLRP-3XFLAG	VK00033
1338	3294706831667914 H05	Klp59D	2014-06-16	Frank Schnorrer	FlyFos019056(pRedFlp-Hgr)(Klp59D[28021]::S000169_fly_pretag)::2XTY1-SGFP-V5-preTEV-BLRP-3XFLAGdFRT	2XTY1-SGFP-V5-preTEV-BLRP-3XFLAG	VK00033
1340	17337204868928058 G05	Dp1	2014-06-24	Vijay Raghavan	FlyFos022628(pRedFlp-Hgr)(Dp1[15347]::2XTY1-SGFP-V5-preTEV-BLRP-3XFLAG)dFRT	2XTY1-SGFP-V5-preTEV-BLRP-3XFLAG	VK00033
1342	17337204868928058 H07	Hdc	2014-06-24	Vijay Raghavan	FlyFos022869(pRedFlp-Hgr)(Hdc[35407]::2XTY1-SGFP-V5-preTEV-BLRP-3XFLAG)dFRT	2XTY1-SGFP-V5-preTEV-BLRP-3XFLAG	VK00033
1344	17337204868928058 A06	CG6370	2014-06-24	Vijay Raghavan	FlyFos022697(pRedFlp-Hgr)(CG6370[29273]::2XTY1-SGFP-V5-preTEV-BLRP-3XFLAG)dFRT	2XTY1-SGFP-V5-preTEV-BLRP-3XFLAG	VK00033
1346	17337204868928058 E08	Ge-1	2014-06-24	Vijay Raghavan	FlyFos022915(pRedFlp-Hgr)(Ge-1[32439]::2XTY1-SGFP-V5-preTEV-BLRP-3XFLAG)dFRT	2XTY1-SGFP-V5-preTEV-BLRP-3XFLAG	VK00033
1348	1708059145882148 D03	CG3800	2014-06-24	Vijay Raghavan	FlyFos015193(pRedFlp-Hgr)(CG3800[25700]::2XTY1-SGFP-V5-preTEV-BLRP-3XFLAG)dFRT	2XTY1-SGFP-V5-preTEV-BLRP-3XFLAG	VK00033
1350	1708059145882148 B11	didum	2014-06-24	Vijay Raghavan	FlyFos016053(pRedFlp-Hgr)(didum[26604]::2XTY1-SGFP-V5-preTEV-BLRP-3XFLAG)dFRT	2XTY1-SGFP-V5-preTEV-BLRP-3XFLAG	VK00033
1351	17337204868928058 H04	CG7997	2014-06-24	Vijay Raghavan	FlyFos022526(pRedFlp-Hgr)(CG7997[18957]::2XTY1-SGFP-V5-preTEV-BLRP-3XFLAG)dFRT	2XTY1-SGFP-V5-preTEV-BLRP-3XFLAG	VK00033
1352	17337204868928058 H10	papi	2014-06-24	Vijay Raghavan	FlyFos023212(pRedFlp-Hgr)(papi[38884]::2XTY1-SGFP-V5-preTEV-BLRP-3XFLAG)dFRT	2XTY1-SGFP-V5-preTEV-BLRP-3XFLAG	VK00033
1353	1708059145882148 A12	Xpd	2014-06-24	Vijay Raghavan	FlyFos016129(pRedFlp-Hgr)(Xpd[26538]::2XTY1-SGFP-V5-preTEV-BLRP-3XFLAG)dFRT	2XTY1-SGFP-V5-preTEV-BLRP-3XFLAG	VK00033
1355	1708059145882148 A03	Map60	2014-06-24	Vijay Raghavan	FlyFos015143(pRedFlp-Hgr)(Map60[19805]::2XTY1-SGFP-V5-preTEV-BLRP-3XFLAG)dFRT	2XTY1-SGFP-V5-preTEV-BLRP-3XFLAG	VK00033
1357	1708059145882148 G03	Vrp1	2014-07-01	Vijay Raghavan	FlyFos015246(pRedFlp-Hgr)(Vrp1[17238]::2XTY1-SGFP-V5-preTEV-BLRP-3XFLAG)dFRT	2XTY1-SGFP-V5-preTEV-BLRP-3XFLAG	VK00033
1359	1708059145882148 G04	CG11436	2014-07-01	Vijay Raghavan	FlyFos015279(pRedFlp-Hgr)(CG11436[35196]::2XTY1-SGFP-V5-preTEV-BLRP-3XFLAG)dFRT	2XTY1-SGFP-V5-preTEV-BLRP-3XFLAG	VK00002
1361	1708059145882148 G08	mei-41	2014-07-01	Vijay Raghavan	FlyFos015758(pRedFlp-Hgr)(mei-41[40552]::2XTY1-SGFP-V5-preTEV-BLRP-3XFLAG)dFRT	2XTY1-SGFP-V5-preTEV-BLRP-3XFLAG	VK00002
1363	9680756374385061 H07	Pngl	2014-08-08	Frank Schnorrer	FlyFos031644(pRedFlp-Hgr)(Pngl[27236]::S000169_fly_pretag)::2XTY1-SGFP-V5-preTEV-BLRP-3XFLAGdFRT	2XTY1-SGFP-V5-preTEV-BLRP-3XFLAG	VK00033
1364	8921672467940407 B01	Clp	2014-08-11	Vijay Raghavan	FlyFos017974(pRedFlp-Hgr)(Clp[23589]::2XTY1-SGFP-V5-preTEV-BLRP-3XFLAG)dFRT	2XTY1-SGFP-V5-preTEV-BLRP-3XFLAG	VK00033
1365	9077719496880051 H08	Pi3K21B	2014-08-11	Vijay Raghavan	FlyFos017110(pRedFlp-Hgr)(Pi3K21B[38001]::2XTY1-SGFP-V5-preTEV-BLRP-3XFLAG)dFRT	2XTY1-SGFP-V5-preTEV-BLRP-3XFLAG	VK00033
1366	1708059145882148 H04	CG11444	2014-08-11	Vijay Raghavan	FlyFos015279(pRedFlp-Hgr)(CG11444[38121]::2XTY1-SGFP-V5-preTEV-BLRP-3XFLAG)dFRT	2XTY1-SGFP-V5-preTEV-BLRP-3XFLAG	VK00002
1367	9077719496880051 F04	CG9411	2014-08-11	Vijay Raghavan	FlyFos016591(pRedFlp-Hgr)(CG9411[41402]::2XTY1-SGFP-V5-preTEV-BLRP-3XFLAG)dFRT	2XTY1-SGFP-V5-preTEV-BLRP-3XFLAG	VK00002
1369	9077719496880051 H05	RnpS1	2014-08-11	Vijay Raghavan	FlyFos016802(pRedFlp-Hgr)(RnpS1[25233]::2XTY1-SGFP-V5-preTEV-BLRP-3XFLAG)dFRT	2XTY1-SGFP-V5-preTEV-BLRP-3XFLAG	VK00002
1370	8921672467940407 A05	tam	2014-08-11	Vijay Raghavan	FlyFos018569(pRedFlp-Hgr)(tam[32353]::2XTY1-SGFP-V5-preTEV-BLRP-3XFLAG)dFRT	2XTY1-SGFP-V5-preTEV-BLRP-3XFLAG	VK00033
1371	8921672467940407 B12	CG17841	2014-08-11	Vijay Raghavan	FlyFos019680(pRedFlp-Hgr)(CG17841[37130]::2XTY1-SGFP-V5-preTEV-BLRP-3XFLAG)dFRT	2XTY1-SGFP-V5-preTEV-BLRP-3XFLAG	VK00002
1373	5906201510157786 D09	Tango7	2014-11-20	Frank Schnorrer	FlyFos031489(pRedFlp-Hgr)(Tango7[36774]::S000169_fly_pretag)::2XTY1-SGFP-V5-preTEV-BLRP-3XFLAGdFRT	2XTY1-SGFP-V5-preTEV-BLRP-3XFLAG	VK00033
1374	7008786456273952 C05	nvy	2014-11-20	Frank Schnorrer	FlyFos015283(pRedFlp-Hgr)(nvy[17866]::S000169_fly_pretag)::2XTY1-SGFP-V5-preTEV-BLRP-3XFLAGdFRT	2XTY1-SGFP-V5-preTEV-BLRP-3XFLAG	VK00033
1375	15333553581398873 E07	Tim10	2014-11-20	Frank Schnorrer	FlyFos030623(pRedFlp-Hgr)(Tim10[31931]::S000169_fly_pretag)::2XTY1-SGFP-V5-preTEV-BLRP-3XFLAGdFRT	2XTY1-SGFP-V5-preTEV-BLRP-3XFLAG	VK00033
1376	19718703541719107 C12	CaMKI	2014-11-26	Frank Schnorrer	FlyFos028644(pRedFlp-Hgr)(CaMKI[37582]::S000169_fly_pretag)::2XTY1-SGFP-V5-preTEV-BLRP-3XFLAGdFRT	2XTY1-SGFP-V5-preTEV-BLRP-3XFLAG	VK00033
1377	5297496741540181 E03	Khc-73	2014-11-26	Frank Schnorrer	FlyFos030205(pRedFlp-Hgr)(Khc-73[27390]::S000169_fly_pretag)::2XTY1-SGFP-V5-preTEV-BLRP-3XFLAGdFRT	2XTY1-SGFP-V5-preTEV-BLRP-3XFLAG	VK00033
1378	5573796164438595 G09	TpnC41C	2014-11-26	Frank Schnorrer	FlyFos018791(pRedFlp-Hgr)(TpnC41C[37669]::S000169_fly_pretag)::2XTY1-SGFP-V5-preTEV-BLRP-3XFLAGdFRT	2XTY1-SGFP-V5-preTEV-BLRP-3XFLAG	VK00033
1379	960688845280488 F08	Klp3A	2014-12-03	Frank Schnorrer	FlyFos025506(pRedFlp-Hgr)(Klp3A[13114]::S000169_fly_pretag)::2XTY1-SGFP-V5-preTEV-BLRP-3XFLAGdFRT	2XTY1-SGFP-V5-preTEV-BLRP-3XFLAG	VK00033
1380	006563088311112075 E08	Mlc2	2014-12-03	Frank Schnorrer	FlyFos027108(pRedFlp-Hgr)(Mlc2[22028]::S000169_fly_pretag)::2XTY1-SGFP-V5-preTEV-BLRP-3XFLAGdFRT	2XTY1-SGFP-V5-preTEV-BLRP-3XFLAG	VK00033
1381	9867027659278738 F01	Mlc1	2014-12-03	Frank Schnorrer	FlyFos016539(pRedFlp-Hgr)(Mlc1[32779]::S000169_fly_pretag)::2XTY1-SGFP-V5-preTEV-BLRP-3XFLAGdFRT	2XTY1-SGFP-V5-preTEV-BLRP-3XFLAG	VK00033
1383	6745694817474591 A05	ewg	2015-01-19	Frank Schnorrer	FlyFos020021(pRedFlp-Hgr)(ewg[24320]::2XTY1-SGFP-V5-preTEV-BLRP-3XFLAG)dFRT	2XTY1-SGFP-V5-preTEV-BLRP-3XFLAG	VK00033
1384	8431894728673938 D04	CG14168	2015-01-19	Frank Schnorrer	FlyFos018104(pRedFlp-Hgr)(CG14168[33401]::2XTY1-SGFP-V5-preTEV-BLRP-3XFLAG)dFRT	2XTY1-SGFP-V5-preTEV-BLRP-3XFLAG	VK00033
1385	03355975781483189 G01	C15	2015-01-19	Frank Schnorrer	FlyFos015051(pRedFlp-Hgr)(C15[33374]::2XTY1-SGFP-V5-preTEV-BLRP-3XFLAG)dFRT	2XTY1-SGFP-V5-preTEV-BLRP-3XFLAG	VK00033
1388	19718703541719107 A05	Tom40	2015-03-02	Frank Schnorrer	FlyFos028556(pRedFlp-Hgr)(Tom40[13148]::S000169_fly_pretag)::2XTY1-SGFP-V5-preTEV-BLRP-3XFLAGdFRT	2XTY1-SGFP-V5-preTEV-BLRP-3XFLAG	VK00033
1394	03996259806504221 H07	osk		Pavel Tomancak	FlyFos026530(pRedFlp-Hgr)(osk[22866]::S000169_fly_pretag)::2XTY1-SGFP-V5-preTEV-BLRP-3XFLAGdFRT	2XTY1-SGFP-V5-preTEV-BLRP-3XFLAG	attP40
10001	9180222713131253 C04	vri	2012-11-29	Frank Schnorrer	FlyFos016682(pRedFlp-Hgr)(vri[17169]::2xTY1-SGFP-3xFLAG)dFRT	2xTY1-SGFP-3xFLAG	VK00033
10004	9180222713131253 A08	sec6	2012-11-29	Frank Schnorrer	FlyFos016960(pRedFlp-Hgr)(sec6[31478]::2xTY1-SGFP-3xFLAG)dFRT	2xTY1-SGFP-3xFLAG	VK00033
10010	6329535328138883 A04	Hsp83	2012-11-29	Frank Schnorrer	FlyFos019724(pRedFlp-Hgr)(Hsp83[18550]::2xTY1-SGFP-3xFLAG)dFRT	2xTY1-SGFP-3xFLAG	VK00033
10013	4562672055690222 B10	CG5958	2012-11-29	Frank Schnorrer	FlyFos027693(pRedFlp-Hgr)(CG5958[17316]::2xTY1-SGFP-3xFLAG)dFRT	2xTY1-SGFP-3xFLAG	VK00033
10017	9180222713131253 D02	CG5885	2012-11-29	Frank Schnorrer	FlyFos016332(pRedFlp-Hgr)(CG5885[26810]::2xTY1-SGFP-3xFLAG)dFRT	2xTY1-SGFP-3xFLAG	VK00033
10018	9180222713131253 A05	CG31772	2012-11-29	Frank Schnorrer	FlyFos016656(pRedFlp-Hgr)(CG31772[13966]::2xTY1-SGFP-3xFLAG)dFRT	2xTY1-SGFP-3xFLAG	VK00033
10022	9180222713131253 B03	CG13159	2012-11-29	Frank Schnorrer	FlyFos016397(pRedFlp-Hgr)(CG13159[36173]::2xTY1-SGFP-3xFLAG)dFRT	2xTY1-SGFP-3xFLAG	VK00033
10025	9180222713131253 B04	CG1021	2012-11-29	Frank Schnorrer	FlyFos016620(pRedFlp-Hgr)(CG1021[35801]::2xTY1-SGFP-3xFLAG)dFRT	2xTY1-SGFP-3xFLAG	VK00033
10028	9180222713131253 D01	Act88F	2012-11-29	Frank Schnorrer	FlyFos016146(pRedFlp-Hgr)(Act88F[36063]::2xTY1-SGFP-3xFLAG)dFRT	2xTY1-SGFP-3xFLAG	VK00033
10029	9180222713131253 C07	nerfin-2	2012-11-29	Frank Schnorrer	FlyFos016999(pRedFlp-Hgr)(nerfin-2[21034]::2xTY1-SGFP-3xFLAG)dFRT	2xTY1-SGFP-3xFLAG	VK00033
10031	8868603710328862 D04	Mtp	2012-11-29	Frank Schnorrer	FlyFos028472(pRedFlp-Hgr)(Mtp[46392]::2xTY1-SGFP-3xFLAG)dFRT	2xTY1-SGFP-3xFLAG	VK00033
10032	9180222713131253 H03	fray	2012-11-29	Frank Schnorrer	FlyFos016585(pRedFlp-Hgr)(fray[16009]::2xTY1-SGFP-3xFLAG)dFRT	2xTY1-SGFP-3xFLAG	VK00033
10035	9180222713131253 G06	CG17912	2012-11-29	Frank Schnorrer	FlyFos016907(pRedFlp-Hgr)(CG17912[32384]::2xTY1-SGFP-3xFLAG)dFRT	2xTY1-SGFP-3xFLAG	VK00033
10036	3015068842848645 A04	CG12391	2012-11-29	Frank Schnorrer	FlyFos018127(pRedFlp-Hgr)(CG12391[36435]::2xTY1-SGFP-3xFLAG)dFRT	2xTY1-SGFP-3xFLAG	VK00033
10039	9180222713131253 E03	Sc2	2012-11-29	Frank Schnorrer	FlyFos016517(pRedFlp-Hgr)(Sc2[37230]::2xTY1-SGFP-3xFLAG)dFRT	2xTY1-SGFP-3xFLAG	VK00033
10040	3015068842848645 H11	CG9876	2012-11-29	Frank Schnorrer	FlyFos019263(pRedFlp-Hgr)(CG9876[35835]::2xTY1-SGFP-3xFLAG)dFRT	2xTY1-SGFP-3xFLAG	VK00033
10041	6329535328138883 C08	CG11617	2012-11-29	Frank Schnorrer	FlyFos020795(pRedFlp-Hgr)(CG11617[19856]::2xTY1-SGFP-3xFLAG)dFRT	2xTY1-SGFP-3xFLAG	VK00033
10042	3015068842848645 D02	Optix	2012-11-29	Frank Schnorrer	FlyFos017967(pRedFlp-Hgr)(Optix[45672]::2xTY1-SGFP-3xFLAG)dFRT	2xTY1-SGFP-3xFLAG	VK00033
10044	4562672055690222 F03	ash1	2012-11-29	Frank Schnorrer	FlyFos026765(pRedFlp-Hgr)(ash1[32157]::2xTY1-SGFP-3xFLAG)dFRT	2xTY1-SGFP-3xFLAG	VK00033
10045	3015068842848645 G01	sec10	2012-11-29	Frank Schnorrer	FlyFos017829(pRedFlp-Hgr)(sec10[24506]::2xTY1-SGFP-3xFLAG)dFRT	2xTY1-SGFP-3xFLAG	VK00033
10052	3015068842848645 H06	ato	2012-11-29	Frank Schnorrer	FlyFos018487(pRedFlp-Hgr)(ato[37785]::2xTY1-SGFP-3xFLAG)dFRT	2xTY1-SGFP-3xFLAG	VK00033
10058	6329535328138883 A05	ewg	2012-11-29	Frank Schnorrer	FlyFos020021(pRedFlp-Hgr)(ewg[24320]::2xTY1-SGFP-3xFLAG)dFRT	2xTY1-SGFP-3xFLAG	VK00033
10059	3015068842848645 A05	CG32121	2012-11-29	Frank Schnorrer	FlyFos018167(pRedFlp-Hgr)(CG32121[17741]::2xTY1-SGFP-3xFLAG)dFRT	2xTY1-SGFP-3xFLAG	VK00033
10060	3015068842848645 G09	Scr	2012-11-29	Frank Schnorrer	FlyFos018974(pRedFlp-Hgr)(Scr[19370]::2xTY1-SGFP-3xFLAG)dFRT	2xTY1-SGFP-3xFLAG	VK00033
10061	3015068842848645 E01	Tsc1	2012-11-29	Frank Schnorrer	FlyFos017829(pRedFlp-Hgr)(Tsc1[27551]::2xTY1-SGFP-3xFLAG)dFRT	2xTY1-SGFP-3xFLAG	VK00033
10062	6329535328138883 B04	WASp	2012-11-29	Frank Schnorrer	FlyFos019867(pRedFlp-Hgr)(WASp[20407]::2xTY1-SGFP-3xFLAG)dFRT	2xTY1-SGFP-3xFLAG	VK00033
10067	9180222713131253 B02	CG5899	2012-11-29	Frank Schnorrer	FlyFos016332(pRedFlp-Hgr)(CG5899[18606]::2xTY1-SGFP-3xFLAG)dFRT	2xTY1-SGFP-3xFLAG	VK00033
10070	6329535328138883 D05	sax	2012-11-29	Frank Schnorrer	FlyFos020152(pRedFlp-Hgr)(sax[19182]::2xTY1-SGFP-3xFLAG)dFRT	2xTY1-SGFP-3xFLAG	VK00033
10074	6329535328138883 D06	E5	2012-11-29	Frank Schnorrer	FlyFos020511(pRedFlp-Hgr)(E5[34297]::2xTY1-SGFP-3xFLAG)dFRT	2xTY1-SGFP-3xFLAG	VK00033
10075	9180222713131253 H07	sqh	2012-11-29	Frank Schnorrer	FlyFos017004(pRedFlp-Hgr)(sqh[34020]::2xTY1-SGFP-3xFLAG)dFRT	2xTY1-SGFP-3xFLAG	VK00033
10076	6329535328138883 F01	argos	2012-11-29	Frank Schnorrer	FlyFos019469(pRedFlp-Hgr)(argos[19494]::2xTY1-SGFP-3xFLAG)dFRT	2xTY1-SGFP-3xFLAG	VK00033
10082	6329535328138883 E03	par-6	2012-11-29	Frank Schnorrer	FlyFos019762(pRedFlp-Hgr)(par-6[32958]::2xTY1-SGFP-3xFLAG)dFRT	2xTY1-SGFP-3xFLAG	VK00033
10085	6329535328138883 C04	crb	2012-11-29	Frank Schnorrer	FlyFos019790(pRedFlp-Hgr)(crb[16014]::2xTY1-SGFP-3xFLAG)dFRT	2xTY1-SGFP-3xFLAG	VK00033
10123	07323567509660489 H03	pho	2012-11-29	Frank Schnorrer	FlyFos021832(pRedFlp-Hgr)(pho[31870]::2xTY1-SGFP-3xFLAG)dFRT	2xTY1-SGFP-3xFLAG	VK00033
10125	6329535328138883 H03	veli	2012-11-29	Frank Schnorrer	FlyFos019695(pRedFlp-Hgr)(veli[14708]::2xTY1-SGFP-3xFLAG)dFRT	2xTY1-SGFP-3xFLAG	VK00033
10129	9180222713131253 D03	CG6470	2012-11-29	Frank Schnorrer	FlyFos016490(pRedFlp-Hgr)(CG6470[20248]::2xTY1-SGFP-3xFLAG)dFRT	2xTY1-SGFP-3xFLAG	VK00033
10130	07323567509660489 H12	hpo	2012-11-29	Frank Schnorrer	FlyFos023034(pRedFlp-Hgr)(hpo[21413]::2xTY1-SGFP-3xFLAG)dFRT	2xTY1-SGFP-3xFLAG	VK00033
10134	33294093041722905 D06	l(1)sc	2012-11-29	Frank Schnorrer	FlyFos015631(pRedFlp-Hgr)(l(1)sc[30893]::2xTY1-SGFP-3xFLAG)dFRT	2xTY1-SGFP-3xFLAG	VK00033
10141	33294093041722905 A06	ebi	2012-11-29	Frank Schnorrer	FlyFos015533(pRedFlp-Hgr)(ebi[22968]::2xTY1-SGFP-3xFLAG)dFRT	2xTY1-SGFP-3xFLAG	VK00033
10143	07323567509660489 C01	Sas-4	2012-11-29	Frank Schnorrer	FlyFos021531(pRedFlp-Hgr)(Sas-4[38929]::2xTY1-SGFP-3xFLAG)dFRT	2xTY1-SGFP-3xFLAG	VK00033
10148	33294093041722905 B01	CG4702	2012-11-29	Frank Schnorrer	FlyFos014971(pRedFlp-Hgr)(CG4702[22910]::2xTY1-SGFP-3xFLAG)dFRT	2xTY1-SGFP-3xFLAG	VK00033
10149	33294093041722905 G04	Blimp-1	2012-11-29	Frank Schnorrer	FlyFos015316(pRedFlp-Hgr)(Blimp-1[18545]::2xTY1-SGFP-3xFLAG)dFRT	2xTY1-SGFP-3xFLAG	VK00033
10152	6329535328138883 G09	CG10092	2012-11-29	Frank Schnorrer	FlyFos020905(pRedFlp-Hgr)(CG10092[26097]::2xTY1-SGFP-3xFLAG)dFRT	2xTY1-SGFP-3xFLAG	VK00033
10155	6329535328138883 F10	Mad	2012-11-29	Frank Schnorrer	FlyFos021005(pRedFlp-Hgr)(Mad[47530]::2xTY1-SGFP-3xFLAG)dFRT	2xTY1-SGFP-3xFLAG	VK00033
10158	33294093041722905 G07	E(spl)	2012-11-29	Frank Schnorrer	FlyFos015754(pRedFlp-Hgr)(E(spl)[24915]::2xTY1-SGFP-3xFLAG)dFRT	2xTY1-SGFP-3xFLAG	VK00033
10163	07323567509660489 C02	Hand	2012-11-29	Frank Schnorrer	FlyFos021711(pRedFlp-Hgr)(Hand[34087]::2xTY1-SGFP-3xFLAG)dFRT	2xTY1-SGFP-3xFLAG	VK00033
10164	22954615134716305 B01	slp2	2012-11-29	Frank Schnorrer	FlyFos023110(pRedFlp-Hgr)(slp2[23427]::2xTY1-SGFP-3xFLAG)dFRT	2xTY1-SGFP-3xFLAG	VK00033
10167	33294093041722905 F07	HLHm5	2012-11-29	Frank Schnorrer	FlyFos015754(pRedFlp-Hgr)(HLHm5[36657]::2xTY1-SGFP-3xFLAG)dFRT	2xTY1-SGFP-3xFLAG	VK00033
10170	6329535328138883 H09	esg	2012-11-29	Frank Schnorrer	FlyFos021004(pRedFlp-Hgr)(esg[27272]::2xTY1-SGFP-3xFLAG)dFRT	2xTY1-SGFP-3xFLAG	VK00033
10174	7654110682321876 A07	CG5625	2012-11-30	Frank Schnorrer	FlyFos018522(pRedFlp-Hgr)(CG5625[19638]::2XTY1-T2A-SGFP-NLS-3XFLAG)dFRT	2XTY1-T2A-SGFP-NLS-3XFLAG	VK00033
10181	33294093041722905 E05	sna	2012-11-29	Frank Schnorrer	FlyFos015520(pRedFlp-Hgr)(sna[12780]::2xTY1-SGFP-3xFLAG)dFRT	2xTY1-SGFP-3xFLAG	VK00033
10187	7654110682321876 B07	knk	2012-11-30	Frank Schnorrer	FlyFos018513(pRedFlp-Hgr)(knk[27968]::2XTY1-T2A-SGFP-NLS-3XFLAG)dFRT	2XTY1-T2A-SGFP-NLS-3XFLAG	VK00033
10188	6822032196972702 B02	drm	2012-11-30	Frank Schnorrer	FlyFos019504(pRedFlp-Hgr)(drm[29372]::2XTY1-T2A-SGFP-NLS-3XFLAG)dFRT	2XTY1-T2A-SGFP-NLS-3XFLAG	VK00033
10195	800514333523657 A08	sec6	2012-11-30	Frank Schnorrer	FlyFos016960(pRedFlp-Hgr)(sec6[31478]::2XTY1-T2A-SGFP-NLS-3XFLAG)dFRT	2XTY1-T2A-SGFP-NLS-3XFLAG	VK00033
10199	7654110682321876 F01	CG2157	2012-11-30	Frank Schnorrer	FlyFos017858(pRedFlp-Hgr)(CG2157[36512]::2XTY1-T2A-SGFP-NLS-3XFLAG)dFRT	2XTY1-T2A-SGFP-NLS-3XFLAG	VK00033
10201	800514333523657 B04	CG1021	2012-11-30	Frank Schnorrer	FlyFos016620(pRedFlp-Hgr)(CG1021[35801]::2XTY1-T2A-SGFP-NLS-3XFLAG)dFRT	2XTY1-T2A-SGFP-NLS-3XFLAG	VK00033
10202	7654110682321876 G01	sec10	2012-11-30	Frank Schnorrer	FlyFos017829(pRedFlp-Hgr)(sec10[24506]::2XTY1-T2A-SGFP-NLS-3XFLAG)dFRT	2XTY1-T2A-SGFP-NLS-3XFLAG	VK00033
10204	800514333523657 B03	CG13159	2012-11-30	Frank Schnorrer	FlyFos016397(pRedFlp-Hgr)(CG13159[36173]::2XTY1-T2A-SGFP-NLS-3XFLAG)dFRT	2XTY1-T2A-SGFP-NLS-3XFLAG	VK00033
10205	800514333523657 H07	sqh	2012-11-30	Frank Schnorrer	FlyFos017004(pRedFlp-Hgr)(sqh[34020]::2XTY1-T2A-SGFP-NLS-3XFLAG)dFRT	2XTY1-T2A-SGFP-NLS-3XFLAG	VK00033
10206	800514333523657 D02	CG5885	2012-11-30	Frank Schnorrer	FlyFos016332(pRedFlp-Hgr)(CG5885[26810]::2XTY1-T2A-SGFP-NLS-3XFLAG)dFRT	2XTY1-T2A-SGFP-NLS-3XFLAG	VK00033
10207	7654110682321876 D06	CG6359	2012-11-30	Frank Schnorrer	FlyFos018385(pRedFlp-Hgr)(CG6359[29776]::2XTY1-T2A-SGFP-NLS-3XFLAG)dFRT	2XTY1-T2A-SGFP-NLS-3XFLAG	VK00033
10210	8255884292167099 C06	Rho1	2012-11-30	Frank Schnorrer	FlyFos015538(pRedFlp-Hgr)(Rho1[19683]::2XTY1-T2A-SGFP-NLS-3XFLAG)dFRT	2XTY1-T2A-SGFP-NLS-3XFLAG	VK00033
10215	8684677272315444 D05	dpp	2012-11-30	Frank Schnorrer	FlyFos022042(pRedFlp-Hgr)(dpp[45452]::2XTY1-T2A-SGFP-NLS-3XFLAG)dFRT	2XTY1-T2A-SGFP-NLS-3XFLAG	VK00033
10219	800514333523657 E02	cas	2012-11-30	Frank Schnorrer	FlyFos016302(pRedFlp-Hgr)(cas[20597]::2XTY1-T2A-SGFP-NLS-3XFLAG)dFRT	2XTY1-T2A-SGFP-NLS-3XFLAG	VK00033
10223	7654110682321876 F02	Poxn	2012-11-30	Frank Schnorrer	FlyFos017995(pRedFlp-Hgr)(Poxn[32075]::2XTY1-T2A-SGFP-NLS-3XFLAG)dFRT	2XTY1-T2A-SGFP-NLS-3XFLAG	VK00033
10225	7654110682321876 H07	fj	2012-11-30	Frank Schnorrer	FlyFos018590(pRedFlp-Hgr)(fj[35773]::2XTY1-T2A-SGFP-NLS-3XFLAG)dFRT	2XTY1-T2A-SGFP-NLS-3XFLAG	VK00033
10228	6822032196972702 C07	pros	2012-11-30	Frank Schnorrer	FlyFos020764(pRedFlp-Hgr)(pros[15376]::2XTY1-T2A-SGFP-NLS-3XFLAG)dFRT	2XTY1-T2A-SGFP-NLS-3XFLAG	VK00033
10229	2027191068155202 B09	BicD	2012-11-30	Frank Schnorrer	FlyFos026006(pRedFlp-Hgr)(BicD[27570]::2XTY1-T2A-SGFP-NLS-3XFLAG)dFRT	2XTY1-T2A-SGFP-NLS-3XFLAG	VK00033
10231	7654110682321876 G11	Dr	2012-11-30	Frank Schnorrer	FlyFos019265(pRedFlp-Hgr)(Dr[33176]::2XTY1-T2A-SGFP-NLS-3XFLAG)dFRT	2XTY1-T2A-SGFP-NLS-3XFLAG	VK00033
10233	173817428704789 E08	ft	2012-11-30	Frank Schnorrer	FlyFos024142(pRedFlp-Hgr)(ft[14047]::2XTY1-T2A-SGFP-NLS-3XFLAG)dFRT	2XTY1-T2A-SGFP-NLS-3XFLAG	VK00033
10234	7654110682321876 D12	p53	2012-11-30	Frank Schnorrer	FlyFos019304(pRedFlp-Hgr)(p53[40564]::2XTY1-T2A-SGFP-NLS-3XFLAG)dFRT	2XTY1-T2A-SGFP-NLS-3XFLAG	VK00033
10236	2027191068155202 F10	rhea	2012-11-30	Frank Schnorrer	FlyFos026125(pRedFlp-Hgr)(rhea[13361]::2XTY1-T2A-SGFP-NLS-3XFLAG)dFRT	2XTY1-T2A-SGFP-NLS-3XFLAG	VK00033
10237	6822032196972702 H10	salr	2012-11-30	Frank Schnorrer	FlyFos021123(pRedFlp-Hgr)(salr[38120]::2XTY1-T2A-SGFP-NLS-3XFLAG)dFRT	2XTY1-T2A-SGFP-NLS-3XFLAG	VK00033
10240	8255884292167099 D04	gsb-n	2012-11-30	Frank Schnorrer	FlyFos015278(pRedFlp-Hgr)(gsb-n[36753]::2XTY1-T2A-SGFP-NLS-3XFLAG)dFRT	2XTY1-T2A-SGFP-NLS-3XFLAG	VK00033
10243	2027191068155202 E09	Khc	2012-11-30	Frank Schnorrer	FlyFos025943(pRedFlp-Hgr)(Khc[31022]::2XTY1-T2A-SGFP-NLS-3XFLAG)dFRT	2XTY1-T2A-SGFP-NLS-3XFLAG	VK00033
10244	2027191068155202 B04	lmd	2012-11-30	Frank Schnorrer	FlyFos025335(pRedFlp-Hgr)(lmd[30814]::2XTY1-T2A-SGFP-NLS-3XFLAG)dFRT	2XTY1-T2A-SGFP-NLS-3XFLAG	VK00033
10245	8684677272315444 H04	Cad99C	2012-11-30	Frank Schnorrer	FlyFos021979(pRedFlp-Hgr)(Cad99C[48138]::2XTY1-T2A-SGFP-NLS-3XFLAG)dFRT	2XTY1-T2A-SGFP-NLS-3XFLAG	VK00033
10248	2027191068155202 A10	gogo	2012-11-30	Frank Schnorrer	FlyFos026082(pRedFlp-Hgr)(gogo[16986]::2XTY1-T2A-SGFP-NLS-3XFLAG)dFRT	2XTY1-T2A-SGFP-NLS-3XFLAG	VK00033
10249	7654110682321876 D05	mirr	2012-11-30	Frank Schnorrer	FlyFos018261(pRedFlp-Hgr)(mirr[18867]::2XTY1-T2A-SGFP-NLS-3XFLAG)dFRT	2XTY1-T2A-SGFP-NLS-3XFLAG	VK00033
10250	800514333523657 G07	fzy	2012-11-30	Frank Schnorrer	FlyFos016969(pRedFlp-Hgr)(fzy[32505]::2XTY1-T2A-SGFP-NLS-3XFLAG)dFRT	2XTY1-T2A-SGFP-NLS-3XFLAG	VK00033
10251	1522781026558664 B11	CG6509	2013-05-16	Frank Schnorrer	FlyFos031718(pRedFlp-Hgr)(CG6509[34874]::2xTY1-SGFP-3xFLAG)dFRT	2xTY1-SGFP-3xFLAG	VK00033

## Sheet: Comparison to GFP_traps
Cambridge and Carnegie traps		MiMIC line	MiMIC- GFP_traps		all fTRG lines	"novel" fTRG lines not covered before
14-3-3epsilon		MI00012	Grd		18w	18w
26-29-p		MI00031	Sema-1a		5-HT1B	5-HT1B
A2bp1		MI00051	dpn		5-HT2	5-HT2
Aats-glupro		MI00099	nAChRalpha1		Aac11	Aac11
Aats-his		MI00107	CG31030		abs	abs
Abl		MI00111	Msp300		Acn	Acn
Acon		MI00126	rdgC		Act88F	Act88F
Actn		MI00135	aret		activin-beta	activin-beta
ade3		MI00139	mbl		Adam	Adam
ade5		MI00149	side		Adar	Adar
AdenoK		MI00155	p130CAS		Ahcy13	alc
AdSS		MI00178	Ac76E		alc	alpha-Est5
AGO1		MI00209	nkd		alpha-Est5	alphaCop
AGO2		MI00245	cv-c		alphaCop	alphaPS4
Ahcy13		MI00265	vib		alphaPS4	alphaTub84B
Ald		MI00269	Roc2		alphaTub84B	amos
Aldh-III		MI00315	Gp210		amos	aop
Alh		MI00347	Abl		aop	Apc
alpha-Cat		MI00380	comm		Apc	Apc2
AMPdeam		MI00386	bol		Apc2	AR-2
Amph		MI00406	hdc		AR-2	ara
apt		MI00407	PP2A-B'		ara	argos
arg		MI00413	Eip63E		argos	ash1
Argk		MI00438	jumu		ash1	asp
arm		MI00459	5-HT2A		asp	ATbp
Arpc2		MI00479	klar		ATbp	ato
Asph		MI00486	Mob2		Atg5	ATP7
Atf-2		MI00493	foxo		ato	Atx2
Atg5		MI00709	Frq1		ATP7	aub
Atpalpha		MI00808	Dscam3		Atx2	ave
ATPCL		MI00833	Galphao		aub	Axn
ATPsyn-beta		MI00848	Shab		ave	babo
B4		MI00909	Alg-2		Axn	ball
babos		MI00919	Jupiter		babo	bam
Bacc		MI00969	CASK		ball	bap
baz		MI01052	CG34114		bam	BBS1
bdg		MI01128	fry		bap	BBS4
bel		MI01144	Ac78C		BBS1	BBS8
betaTub56D		MI01181	scramb1		BBS4	BEAF-32
BicD		MI01202	AdoR		BBS8	beta4GalNAcTA
bl		MI01205	pyd		BEAF-32	beta4GalT7
bmm		MI01217	bon		beta4GalNAcTA	betaInt-nu
bol		MI01256	Baldspot		beta4GalT7	betaTub60D
Bsg		MI01264	blot		betaInt-nu	betaTub85D
Btk29A		MI01307	p53		betaTub60D	BicC
bun		MI01347	bi		betaTub85D	Blimp-1
Cad87A		MI01358	dpr6		BicC	BM-40-SPARC
Cam		MI01408	dpr15		BicD	bnb
CaMKII		MI01467	beat-Ic		Blimp-1	borr
Capr		MI01483	psq		BM-40-SPARC	brk
Cas		MI01492	Pxn		bnb	Bro
Cat		MI01496	shn		borr	BRWD3
CBP		MI01498	sdk		brk	bsf
cbt		MI01549	bs		Bro	BtbVII
Cda4		MI01552	ed		BRWD3	btl
Ced-12		MI01630	nrm		bs	C15
cg		MI01638	ImpL2		bsf	Cad99C
CG10383		MI01695	dpr12		BtbVII	CaMKI
CG1041		MI01722	CG4587		btl	casp
CG10512		MI01735	Shaw		C15	Catsup
CG10576		MI01743	dpr11		cact	Cbl
CG10927		MI01785	nAChRalpha6		Cad99C	Cbp20
CG10984		MI01790	MTA1-like		CaMKI	Cbs
CG11030		MI01791	for		CaMKII	Cchl
CG11138		MI01824	neur		Camta	Cdc42
CG11266		MI01893	Dystrophin		cas	CG10092
CG11486		MI01907	Gprk2		casp	CG10096
CG11576		MI02025	Hmx		Catsup	CG1021
CG11920		MI02031	CG32791		Cbl	CG1024
CG12163		MI02101	Syp		CBP	CG10254
CG13920		MI02135	klg		Cbp20	CG10283
CG1399		MI02168	shakB		Cbs	CG10333
CG14207		MI02197	Syt1		cbt	CG10431
CG1440		MI02201	dpr		Cchl	CG10445
CG15628		MI02206	nAChRbeta2		Cdc42	CG10470
CG1640		MI02222	Glut1		CG10092	CG10625
CG1648		MI02243	GLaz		CG10096	CG10627
CG1674		MI02272	Antp		CG1021	CG10641
CG16786		MI02290	igl		CG1024	CG10732
CG16812		MI02292	osa		CG10254	CG10802
CG16890		MI02300	crc		CG10283	CG10841
CG17839		MI02321	Dscam1		CG10333	CG10881
CG17931		MI02376	sif		CG10431	CG10949
CG18769		MI02407	brat		CG10445	CG10959
CG1910		MI02457	CG5853		CG10470	CG10979
CG2991		MI02461	fas		CG10625	CG11033
CG3036		MI02556	Lk6		CG10627	CG11055
CG30463		MI02577	alpha-Cat		CG10641	CG11071
CG30497		MI02578	SerT		CG10732	CG11122
CG31431		MI02620	Rdl		CG10802	CG11160
CG31694		MI02729	dysc		CG10841	CG11164
CG31997		MI02741	Trl		CG10881	CG11294
CG32066		MI02791	CG33543		CG10949	CG11398
CG32479		MI02796	CG15630		CG10959	CG11403
CG32549		MI02844	Ten-m		CG10979	CG11436
CG32676		MI02852	Egfr		CG11033	CG11444
CG32683		MI02890	GluClalpha		CG11055	CG1146
CG33123		MI02911	bun		CG11071	CG11509
CG33158		MI02915	Pk92B		CG11122	CG11586
CG34401		MI02928	rdx		CG11160	CG11617
CG34422		MI02987	brp		CG11164	CG11726
CG3777		MI03001	sns		CG11294	CG11899
CG3902		MI03008	CG11221		CG11398	CG11919
CG3921		MI03050	dsx		CG11403	CG12118
CG3939		MI03085	Dop1R1		CG11436	CG12140
CG4004		MI03102	beat-IIb		CG11444	CG12288
CG4038		MI03191	CG31646		CG1146	CG12316
CG42258		MI03208	fred		CG11509	CG12361
CG42342		MI03223	nAChRalpha4		CG11586	CG12370
CG42389		MI03229	timeout		CG11617	CG12391
CG42684		MI03415	dnc		CG11726	CG12582
CG42748		MI03440	tau		CG11899	CG12701
CG43333		MI03470	Rim		CG11919	CG12938
CG43427		MI03557	dpr10		CG12118	CG12942
CG43740		MI03594	dpr9		CG12140	CG13001
CG45049		MI03652	trio		CG12288	CG13159
CG4743		MI03653	Mical		CG12316	CG1316
CG4825		MI03674	Fas3		CG12361	CG13231
CG4829		MI03683	Herp		CG12370	CG13287
CG5010		MI03726	beat-IIIc		CG12391	CG13300
CG5059		MI03803	arr		CG12582	CG1340
CG5174		MI03906	drongo		CG12701	CG13426
CG5642		MI03941	Mhc		CG12938	CG13624
CG5830		MI03969	beat-VI		CG12942	CG13679
CG6084		MI04002	Cnx99A		CG13001	CG13913
CG6293		MI04030	heph		CG13159	CG13996
CG6330		MI04033	sm		CG1316	CG14168
CG6340		MI04076	Pex10		CG13231	CG14230
CG6398		MI04189	Piezo		CG13287	CG14250
CG6424		MI04217	dlp		CG13300	CG14264
CG6499		MI04411	Ten-a		CG1340	CG14290
CG6583		MI04413	slo		CG13426	CG14355
CG6724		MI04508	Cha		CG13624	CG14443
CG6852		MI04522	Cat		CG13679	CG1461
CG6983		MI04563	NetA		CG13913	CG14628
CG7185		MI04570	Camta		CG13996	CG14667
CG7201		MI04730	pdgy		CG14168	CG14718
CG7338		MI04761	orb		CG14230	CG14882
CG7484		MI04825	pum		CG14250	CG14891
CG7675		MI04831	cert		CG14264	CG14962
CG7837		MI04842	rst		CG14290	CG15011
CG7920		MI04868	Dl		CG14355	CG15216
CG7985		MI04965	CG12484		CG14443	CG15436
CG8036		MI04979	VGlut		CG1461	CG15440
CG8209		MI05111	sima		CG14628	CG15455
CG8213		MI05200	Eip93F		CG14667	CG15611
CG8258		MI05212	Or47b		CG14718	CG15715
CG8552		MI05253	rg		CG14882	CG15730
CG8920		MI05295	Dif		CG14891	CG15923
CG9265		MI05302	Trpm		CG14962	CG1620
CG9336		MI05320	EcR		CG15011	CG1663
CG9338		MI05334	Ser		CG15216	CG16758
CG9650		MI05371	unc-5		CG15436	CG16863
CG9796		MI05382	crb		CG15440	CG16899
cher		MI05387	RhoGAP100F		CG15455	CG16965
chrb		MI05488	TrissinR		CG15611	CG17082
ci		MI05512	Treh		CG15715	CG17086
cic		MI05533	WASp		CG15730	CG17264
cindr		MI05549	nAChRalpha5		CG15923	CG17359
Cip4		MI05577	dpr13		CG1620	CG17361
Clic		MI05598	Atpalpha		CG1663	CG17568
cno		MI05602	Sema-2a		CG16758	CG17801
cold		MI05646	spir		CG16863	CG17803
Cp1		MI05715	beat-IV		CG16899	CG17819
cpx		MI05748	Ance		CG16965	CG17834
CR43670		MI05774	hig		CG17082	CG17841
Crc		MI05781	SPoCk		CG17086	CG17912
crp		MI05788	TkR86C		CG17264	CG18011
ct		MI05807	Octbeta1R		CG17359	CG18012
CTPsyn		MI05859	Luna		CG17361	CG18132
ctrip		MI05929	Or65a		CG17568	CG1832
CtsB1		MI05963	dpr3		CG17801	CG18347
cup		MI06181	robo3		CG17803	CG18659
CycB		MI06307	Trpml		CG17819	CG18764
D1		MI06350	fru		CG17834	CG1882
dally		MI06353	dlg1		CG17841	CG2118
dap		MI06441	CrebA		CG17912	CG2157
Dek		MI06502	AP-2alpha		CG18011	CG2199
Df31		MI06684	fra		CG18012	CG2202
dlg1		MI06823	Pdk1		CG18132	CG2691
dlp		MI06860	spri		CG1832	CG2712
dnc		MI06880	crp		CG18347	CG2774
Dp		MI06892	CRMP		CG18659	CG2790
dp		MI07022	Sh		CG18764	CG2807
Drat		MI07056	Atg1		CG1882	CG2931
drd		MI07099	Fim		CG2118	CG30020
drk		MI07215	unc-104		CG2157	CG3032
Dsp1		MI07289	cact		CG2199	CG3075
dsx-c73A		MI07345	Ace		CG2202	CG31534
Dys		MI07645	TrpA1		CG2691	CG3165
Eaf		MI07729	A2bp1		CG2712	CG31751
ed		MI07745	pbl		CG2774	CG31772
EF2		MI07821	spen		CG2790	CG31802
eff		MI08287	CG34391		CG2807	CG31835
eIF-1A		MI08542	SKIP		CG2931	CG31935
eIF-4a		MI08547	trpl		CG30020	CG32121
eIF-4B		MI08818	qless		CG3032	CG32138
eIF-4E		MI08892	Gycbeta100B		CG3075	CG32344
eIF3-S10		MI09783	unk		CG31534	CG32495
eIF4G		MI09878	Meltrin		CG3165	CG32512
eIF5B					CG31751	CG32667
Eip63E					CG31772	CG33229
Elf					CG31802	CG3335
emc					CG31835	CG33695
eRF1					CG31935	CG3376
fabp					CG32066	CG3407
Fas2					CG32121	CG34205
Fas3					CG32138	CG34377
fat-spondin					CG32344	CG34380
fax					CG32495	CG3654
Fer1HCH					CG32512	CG3732
Fer2LCH					CG32667	CG3800
Fim					CG33229	cg3838
Fkbp14					CG3335	CG3893
fl(2)d					CG33695	CG3927
Flo2					CG3376	CG3964
flr					CG3407	CG4078
flw					CG34205	CG4136
for					CG34377	CG42585
Fpps					CG34380	CG4288
fra					CG3654	CG4360
fs(1)h					CG3732	CG4408
Fs(2)Ket					CG3800	CG4424
ftz-f1					cg3838	CG4565
fwe					CG3893	CG4570
Gad1					CG3927	CG4612
Galphao					CG3964	CG4681
gammaCOP					CG4078	CG4702
Gdh					CG4136	CG4707
Gdi					CG42585	CG4769
gish					CG4288	CG4806
GlcAT-S					CG4360	CG4901
glec					CG4408	CG4936
Gli					CG4424	CG5023
Glycogenin					CG4565	CG5098
Got1					CG4570	CG5205
Gpdh					CG4612	CG5210
Gprk2					CG4681	CG5213
grp					CG4702	CG5270
Gs2					CG4707	CG5316
HDAC4					CG4769	CG5347
heph					CG4806	CG5514
His2Av					CG4901	CG5541
homer					CG4936	CG5589
how					CG5023	CG5625
Hrb87F					CG5098	CG5639
Hrb98DE					CG5205	CG5669
Hs6st					CG5210	CG5720
Hsc70-4					CG5213	CG5808
Hsc70Cb					CG5270	CG5840
hth					CG5316	CG5885
hts					CG5347	CG5899
IA-2					CG5514	CG5946
Idh					CG5541	CG5958
if					CG5589	CG6151
Ilk					CG5625	CG6153
Imp					CG5639	CG6201
Indy					CG5669	CG6227
Ino80					CG5720	CG6254
Inx7					CG5808	CG6272
JIL-1					CG5840	CG6287
jumu					CG5885	CG6359
Jupiter					CG5899	CG6370
kat80					CG5946	CG6409
kek1					CG5958	CG6415
kis					CG6151	CG6418
Klp54D					CG6153	CG6470
koi					CG6201	CG6509
kst					CG6227	CG6688
kuz					CG6254	CG6792
L					CG6272	CG6813
l(1)G0222					CG6287	CG7045
l(1)G0232					CG6359	CG7056
l(1)G0320					CG6370	CG7099
l(2)08717					CG6409	CG7182
l(2)k01209					CG6415	CG7331
l(3)02640					CG6418	CG7357
Lac					CG6470	CG7376
Lam					CG6509	CG7394
LamC					CG6688	CG7433
Lamp1					CG6792	CG7470
larp					CG6813	CG7804
Lasp					CG7045	CG7830
Lk6					CG7056	CG7860
lola					CG7099	CG7903
lost					CG7182	CG7922
LRP1					CG7185	CG7963
Lsd-2					CG7331	CG7997
Map205					CG7357	CG8021
Mapmodulin					CG7376	CG8064
mask					CG7394	CG8119
Mat89Ba					CG7433	CG8159
mbc					CG7470	CG8214
mbl					CG7804	CG8316
Mdh1					CG7830	CG8378
Mdh2					CG7860	CG8405
me31B					CG7903	CG8408
Meltrin					CG7922	CG8435
Men					CG7963	CG8516
MEP-1					CG7997	CG8596
mew					CG8021	CG8635
MFS3					CG8064	CG8768
mge					CG8119	CG8778
mgl					CG8159	CG8801
Mhc					CG8214	CG8839
Mi-2					CG8316	CG8915
mia					CG8378	CG9098
Mio					CG8405	CG9109
mip120					CG8408	CG9215
mip130					CG8435	CG9312
Mlc1					CG8516	CG9323
Mnt					CG8596	CG9346
Mob2					CG8635	CG9350
Moca-cyp					CG8768	CG9411
mRpL13					CG8778	CG9547
mRpS9					CG8801	CG9588
msk					CG8839	CG9598
msn					CG8915	CG9640
Msp300					CG9098	CG9817
MTA1-like					CG9109	CG9876
Mtor					CG9215	CG9895
mts					CG9312	CG9961
mub					CG9323	Chd3
Myo10A					CG9336	chico
N					CG9346	chm
Nak					CG9350	CHMP2B
nej					CG9411	chn
NetA					CG9547	cin
NetB					CG9588	Cirl
neur					CG9598	CkIIalpha
NFAT					CG9640	CLIP-190
Nlp					CG9817	cln3
Nmdmc					CG9876	Clp
nmo					CG9895	cnk
nonA					CG9961	comr
Npc1b					Cha	Coq2
Npl4					Chd3	corto
Nrg					chico	Cp18
nrv1					chm	Cp7Fc
nrv2					CHMP2B	crok
Nrx-IV					chn	crol
nudC					chrb	cta
oaf					cin	D
obst-E					Cirl	D19A
Oda					CkIIalpha	DAT
olf413					CLIP-190	dco
orb2					cln3	Ddx1
osa					Clp	Deaf1
Oscp					cnk	dei
otk					comr	Dhap-at
pAbp					Coq2	didum
Pabp2					corto	dimm
Papss					Cp18	DIP2
Past1					Cp7Fc	dmrt93B
Pat1					crb	dock
path					crok	dome
Pax					crol	Dox-A3
pbl					cta	Dp1
Pdcd4					D	dpp
Pde11					D19A	Dr
Pde8					DAT	drm
Pdi					dco	E(bx)
Pdk1					Ddx1	E(spl)
PH4alphaEFB					Deaf1	E2f2
phyl					dei	E5
Picot					Df31	ebi
PIG-S					Dhap-at	ecd
Pino					didum	Ect3
pip					Dif	egr
piwi					dimm	eIF4AIII
Pka-C3					DIP2	eIF5
Pka-R2					dl	Ent2
Pkn					dlg1	Ent3
Pli					dmrt93B	Eph
PMCA					dock	Ephrin
Pmm45A					dome	ergic53
polo					Dox-A3	esc
Pop2					Dp	esg
PpD3					Dp1	Ets21C
ps					dpp	ewg
Psi					Dr	exu
Ptp10D					drm	ey
Ptp69D					E(bx)	eya
pUf68					E(spl)	eyg
pug					E2f2	Fdh
pum					E5	Fer2
Pxn					ebi	Fhos
pyd					ecd	fj
qkr58E-1					Ect3	fliI
qsm					egr	fln
Rab1					eIF-4a	fng
Rab11					eIF-4B	fray
Rab2					eIF-4E	ft
Rack1					eIF4AIII	ftz
Reck					eIF5	Fuca
Rho1					Ent2	fz3
RhoGAP93B					Ent3	fz4
RhoGDI					Eph	fzy
Rm62					Ephrin	G-salpha60A
rngo					ergic53	GABA-B-R2
RpL10Ab					esc	GABA-B-R3
RpL41					esg	Gal
RpS2					Ets21C	Gale
RpS9					ewg	galectin
Rtnl1					exu	Gap1
rudhira					ey	gd
rump					eya	Ge-1
S6k					eyg	Gfr
sals					Fdh	Girdin
Sap-r					Fer2	Gl
Sap130					Fhos	glo
Sar1					Fim	Glu-RI
scny					fj	GluRIIA
sd					fliI	GluRIIC
Sdc					fln	GluRIIE
sdk					fng	GlyP
Sec61alpha					fray	gogo
Sec63					ft	Gr21a
SelR					ftz	Gr63a
Sema-1a					Fuca	grim
Sema-1b					fz3	Grip71
Sema-2a					fz4	grk
Sep1					fzy	gro
seq					G-salpha60A	gsb
sgg					GABA-B-R2	gsb-n
Sh3beta					GABA-B-R3	Gyk
shep					Gal	Hand
shot					Gale	hb
siz					galectin	HDAC6
skap					Gap1	Hel89B
skd					gd	Hex-A
Skp2					Ge-1	HGTX
sls					Gfr	HisCl1
sm					Girdin	Hlc
SmD1					Gl	HLH54F
SmD3					glo	HLHm5
Smr					Glu-RI	Hml
sno					GluRIIA	hoip
Spc105R					GluRIIC	hop
spdo					GluRIIE	HP1b
Spn					GlyP	HP1c
Spt6					gogo	Hph
sqd					Gr21a	hpo
Src64B					Gr63a	Hpr1
srl					Grd	Hrb27C
ss					grim	Hrd3
ssp2					Grip71	Hsp26
stai					grk	Hsp83
step					gro	htl
stg					gsb	HtrA2
stv					gsb-n	ifc
stwl					Gyk	inaE
Su(var)2-10					Hand	ind
Surf4					hb	iPLA2-VIA
Swip-1					HDAC6	Irbp
sws					Hdc	Kap-alpha3
Sytbeta					Hel89B	kar
T-cp1					Hex-A	Kettin / sls
tara					HGTX	KH1
tau					HisCl1	Khc
Tcp-1eta					Hlc	Khc-73
Ten-m					HLH54F	Kif3C
TER94					HLHm5	Klc
Thor					Hml	Klp3A
Tis11					Hmx	Klp59D
tkv					hoip	klu
tlk					hop	knk
Tm1					HP1b	knrl
tmod					HP1c	kto
Top1					Hph	kz
Tpr2					hpo	l(1)G0004
tra2					Hpr1	l(1)G0230
tral					Hrb27C	l(1)sc
trol					Hrb87F	l(2)35Df
Trxr-1					Hrd3	l(2)gd1
Tsf2					Hsp26	l(2)k05819
Tsp					Hsp83	l(2)k16918
Tsp42Ed					htl	l(2)not
Tsp42Ee					HtrA2	LanA
Tsp96F					hts	LanB1
tsr					ifc	lgs
Tudor-SN					Ilk	Lig4
twin					inaE	Liprin-beta
tws					ind	Lis-1
U2af50					Ino80	lmd
Ubqn					iPLA2-VIA	Lmpt
Ubx					Irbp	LpR1
Uev1A					Kap-alpha3	Lsm11
UGP					kar	LvpD
Unc-115a					kek1	M6
Unc-115b					Kettin / sls	Mad
unc-13					KH1	maf-S
unk					Khc	mago
VAChT					Khc-73	Mal-A1
Vap-33A					Kif3C	Map60
Vha13					Klc	mats
Vha16-1					Klp3A	mav
Vha26					Klp59D	Mct1
Vha55					klu	Med
VhaSFD					knk	MED17
vib					knrl	MED30
vig					kto	MED4
vimar					kz	mei-41
vkg					l(1)G0004	Men-b
vsg					l(1)G0230	MESR4
whd					l(1)G0320	Mf
x16					l(1)sc	mfas
yps					l(2)35Df	Mgat2
ZAP3					l(2)gd1	mib2
Zasp52					l(2)k05819	MICAL-like
Zasp66					l(2)k16918	mid
zip					l(2)not	mirr
Zn72D					LanA	Mkp3
ZnT77C					LanB1	Mlc2
					lgs	Mlp60A
					Lig4	Mlp84B
					Liprin-beta	Mmp1
					Lis-1	Mnf
					lmd	Mocs2
					Lmpt	mod
					LpR1	mor
					Lsm11	Mp20
					LvpD	mre11
					M6	MTF-1
					Mad	Mtp
					maf-S	mus301
					mago	Myd88
					Mal-A1	myoglianin
					Map60	mys
					mask	nAcRbeta-64B
					mats	nau
					mav	Nc
					Mct1	Ndg
					Med	neb
					MED17	Nedd8
					MED30	Neos
					MED4	nerfin-1
					mei-41	nerfin-2
					Men-b	net
					MESR4	Nhe3
					Mf	nito
					mfas	Nmdar1
					Mgat2	Nop60B
					mge	nos
					Mhc	NPC1
					mib2	Nplp2
					MICAL-like	Nplp4
					mid	Ntl
					mip120	numb
					mirr	Nup107
					Mkp3	Nup98-96
					Mlc1	nvy
					Mlc2	oa2
					Mlp60A	odd
					Mlp84B	onecut
					Mmp1	Opbp
					Mnf	Optix
					Mnt	Orco
					Moca-cyp	org-1
					Mocs2	osk
					mod	OstStt3
					mor	pain
					Mp20	Paip2
					mre11	papi
					MTF-1	par-6
					Mtp	pck
					mus301	Pdsw
					Myd88	pea
					myoglianin	pen
					mys	pex2
					nAcRbeta-64B	phl
					nau	pho
					Nc	Pi3K21B
					Ndg	Pi3K68D
					neb	Pink1
					Nedd8	pit
					Neos	Pka-R1
					nerfin-1	Pld
					nerfin-2	Pngl
					net	por
					Nhe3	porin
					nito	Poxn
					Nmdar1	Pp1alpha-96A
					Nop60B	Ppcs
					nos	ppl
					NPC1	prc
					Nplp2	Prm
					Nplp4	proPO-A1
					nrv2	pros
					Ntl	Prp19
					numb	ptc
					Nup107	put
					Nup98-96	Pvr
					nvy	pyd3
					oa2	pyr
					odd	QC
					onecut	qkr54B
					Opbp	rab3-GAP
					Optix	Rab35
					orb2	RacGAP84C
					Orco	RagA
					org-1	rap
					osk	raptor
					OstStt3	Ras85D
					p53	Rbf2
					Pabp2	Rbp1
					pain	Rbp4
					Paip2	Rbsn
					papi	Rca1
					par-6	Ref1
					pck	Rfabg
					Pdk1	rhea
					Pdsw	rho
					pea	rho-5
					pen	rho-6
					pex2	RhoGAP102A
					phl	RhoGAP15B
					pho	RhoGAP16F
					Pi3K21B	RhoGAP5A
					Pi3K68D	RhoGEF2
					Pink1	RhoGEF4
					pit	RhoL
					Pka-R1	Rhp
					Pld	rib
					Pngl	rictor
					por	RnpS1
					porin	ro
					Poxn	robo
					Pp1alpha-96A	rost
					PP2A-B'	RpS15Ab
					Ppcs	rt
					ppl	Rx
					prc	S
					Prm	Sac1
					proPO-A1	Saf-B
					pros	SAK
					Prp19	salm
					ptc	salr
					pUf68	Sans
					put	sas
					Pvr	Sas-4
					pyd3	sax
					pyr	sbb
					QC	sc
					qkr54B	Sc2
					qless	Scr
					rab3-GAP	scrt
					Rab35	scu
					RacGAP84C	sec10
					RagA	sec15
					rap	Sec16
					raptor	Sec22
					Ras85D	sec5
					Rbf2	sec6
					Rbp1	sens
					Rbp4	SF2
					Rbsn	Shc
					Rca1	sim
					Ref1	Sin3A
					Rfabg	sinu
					rhea	Sip1
					rho	slam
					rho-5	slim
					rho-6	Slip1
					Rho1	slp2
					RhoGAP102A	smg
					RhoGAP15B	Smn
					RhoGAP16F	smo
					RhoGAP5A	sna
					RhoGDI	Snp
					RhoGEF2	Sobp
					RhoGEF4	Sos
					RhoL	Sox15
					Rhp	Sox21a
					rib	SoxN
					rictor	spd-2
					Rm62	spn-E
					RnpS1	Spn4
					ro	Spn43Aa
					robo	Spred
					rost	sqh
					RpS15Ab	srp
					rt	Srp54
					Rx	Ssadh
					S	ssh
					Sac1	Ssrp
					Saf-B	stan
					SAK	sty
					salm	Su(dx)
					salr	Su(fu)
					Sans	Suv4-20
					sas	swm
					Sas-4	Syn2
					sax	t
					sbb	Taf12
					sc	Tak1
					Sc2	tam
					Scr	tan
					scrt	Tango1
					scu	Tango10
					sec10	Tango11
					sec15	Tango14
					Sec16	Tango2
					Sec22	Tango4
					sec5	Tango5
					sec6	Tango6
					Sec61alpha	Tango7
					sens	Tbh
					SF2	Tbp
					Shc	tef
					sim	Tim10
					Sin3A	Tim8
					sinu	tinc
					Sip1	tio
					slam	tj
					slim	Tom40
					Slip1	Top3alpha
					slp2	Tor
					smg	TORC
					Smn	TpnC25D
					smo	TpnC4
					sna	TpnC41C
					Snp	Tsc1
					Sobp	Tsf1
					Sos	tty
					Sox15	tub
					Sox21a	twr
					SoxN	TyrRII
					spd-2	U2af38
					spn-E	Ugt86Da
					Spn4	Unc-76
					Spn43Aa	Unc-89
					Spred	Unr
					sqh	usnp
					srp	uzip
					Srp54	vas
					Ssadh	veli
					ssh	Vha44
					Ssrp	Vinc
					stan	Vmat
					stwl	vnd
					sty	vri
					Su(dx)	Vrp1
					Su(fu)	wdn
					Suv4-20	wech
					swm	wge
					Syn2	wgn
					Syt1	wit
					t	Wnk
					Taf12	wol
					Tak1	wupA
					tam	X11L
					tan	Xbp1
					Tango1	xmas-2
					Tango10	XNP
					Tango11	Xpd
					Tango14	y
					Tango2	yki
					Tango4	Yp1
					Tango5	yrt
					Tango6	Z4
					Tango7	zen
					Tbh	zen2
					Tbp	Zfrp8
					tef	zormin
					Tim10
					Tim8
					tinc
					tio
					tj
					Tom40
					Top3alpha
					Tor
					TORC
					TpnC25D
					TpnC4
					TpnC41C
					trpml
					Tsc1
					Tsf1
					tty
					tub
					twr
					TyrRII
					U2af38
					U2af50
					Ugt86Da
					unc-5
					Unc-76
					Unc-89
					Unr
					usnp
					uzip
					vas
					veli
					Vha44
					Vinc
					vkg
					Vmat
					vnd
					vri
					Vrp1
					WASp
					wdn
					wech
					wge
					wgn
					wit
					Wnk
					wol
					wupA
					X11L
					x16
					Xbp1
					xmas-2
					XNP
					Xpd
					y
					yki
					Yp1
					yrt
					Z4
					zen
					zen2
					Zfrp8
					zormin
