# Supplementary material for: A genome-wide resource for the analysis of protein localisation in Drosophila
Source: eLife. 2016 Feb 20;5:e12068. doi: 10.7554/eLife.12068 (PMC4805545; doi:10.7554/eLife.12068)
Supplement: Supplementary file 3. — Table listing the expression patterns for 115 fTRG lines in ovaries. Expression was detected in 94 lines by anti-GFP antibody stainings. Cell type specific expression and subcellular localisations were monitored for these lines. DOI: http://dx.doi.org/10.7554/eLife.12068.035 [file elife-12068-supp3.xlsx]

## Sheet: Sheet1
Transformant_fTRGnumber	FBgn_id	Gene	ovary cell type expression	sub-cellular localisation	nuclear	cytoplasm	cortical	interesting
4	FBgn0011763	Dp	germ cells and epithelial cells	nuclear	1			1
9	FBgn0037992	CG4702	no signal	n.a.
13	FBgn0038032	CG10096	no signal	n.a.
25	FBgn0002973	numb	germ cells and epithelial cells	cortical / cell membrane			1	1
32	FBgn0026562	BM-40-SPARC	no signal	n.a.
53	FBgn0037513	pyd3	subset of epithelial cells: anterior/posterior cells	cytoplasm		1		1
64	FBgn0032157	Etl1	germ cells and epithelial cells	nuclear	1			1
74	FBgn0035471	sc2	germ cells and epithelial cells	oocyte enriched / nurse cells perinuclear				1
76	FBgn0037443	CG1021	germ cells and epithelial cells	oocyte enriched / nurse cells perinuclear				1
84	FBgn0039044	p53	germ cells	nuclear	1			1
85	FBgn0259685	Dr	germ cells and epithelial cells	nuclear	1			1
87	FBgn0035625	Blimp-1	no signal	n.a.
88	FBgn0025360	Optix	no signal	n.a.
91	FBgn0000658	fj	subset of epithelial cells	cytoplasm		1		1
101	FBgn0008646	E5	subset of epithelial cells: anterior/posterior cells	nuclear	1			1
125	FBgn0039269	veli	germ cells and epithelial cells	uniform in all cells
134	FBgn0015218	eIF-4E	germ cells and epithelial cells	uniform in all cells
137	FBgn0259685	crb	germ cells and epithelial cells	oocyte enriched / apical in follicle cells			1	1
148	FBgn0015904	ara	subset of epithelial cells: anterior/posterior cells	cytoplasm		1		1
150	FBgn0028980	tan	germ cells	cytoplasm		1		1
166	FBgn0263118	dei	subset of epithelial cells	nuclear	1			1
168	FBgn0024191	sip1	germ cells and epithelial cells	cytoplasm / nuclear	1	1		1
178	FBgn0041188	Atx2	epithelial cells	cytoplasm		1		1
179	FBgn0035856	CG13679	no signal	n.a.
182	FBgn0016076	vri	epithelial cells	nuclear	1			1
192	FBgn0005642	wdn	germ cells and epithelial cells	nuclear	1			1
207	FBgn0032130	CG3838	no signal	n.a.
240	FBgn0004101	bs	germ cells and epithelial cells	nuclear	1			1
245	FBgn0020309	crol	epithelial cells	nuclear	1			1
257	FBgn0032858	CG10949	no signal	n.a.
264	FBgn0261363	Dox-A3	germ cells	cytoplasm		1		1
275	FBgn0027561	CG18659	no signal	n.a.
286	FBgn0038179	CG9312	no signal	n.a.
288	FBgn0035878	CG7182	germ cells and epithelial cells	uniform in all cells
289	FBgn0034084	CG8435	germ cells and epithelial cells	nuclear	1			1
296	FBgn0036483	CG12316	germ cells	cytoplasm / perinuclear		1		1
308	FBgn0040305	MTF-1	epithelial cells	cytoplasm		1		1
323	FBgn0015371	chn	germ cells and epithelial cells	nuclear	1			1
329	FBgn0036004	CG3654	germ cells and epithelial cells	cytoplasm / nuclear	1	1		1
333	FBgn0259785	CG7752	epithelial cells	nuclear	1			1
340	FBgn0003254	rib	no signal	n.a.
349	FBgn0024294	Spn43Aa	subset of epithelial cells: anterior/posterior cells	cytoplasm		1		1
351	FBgn0020617	Rx	no signal	n.a.
356	FBgn0022935	D19A	epithelial cells	nuclear	1			1
368	FBgn0010313	Corto	subset of epithelial cells: anterior/posterior cells	cytoplasm		1		1
372	FBgn0032015	Ostgamma	germ cells	cytoplasm / perinuclear		1		1
373	FBgn0034194	CG15611	germ cells	cytoplasm		1		1
376	FBgn0038768	CG4936	germ cells and epithelial cells	nuclear	1			1
377	FBgn0029905	Nf-YC	germ cells and epithelial cells	cytoplasm / nuclear	1	1		1
401	FBgn0040318	HGTX	no signal	n.a.
408	FBgn0028996	onecut	no signal	n.a.
409	FBgn0035036	CG4707	germ cells and epithelial cells	nuclear	1			1
425	FBgn0085065	CG5669	germ cells and epithelial cells	nuclear	1			1
436	FBgn0261020	wol	germ cells	oocyte enriched				1
443	FBgn0010575	sbb	germ cells and epithelial cells	nuclear	1			1
448	FBgn0020386	Pdk1	no signal	n.a.
456	FBgn0024248	chico	germ cells and epithelial cells	uniform in all cells
458	FBgn0035872	CG7185	germ cells and epithelial cells	nuclear	1			1
467	FBgn0000709	fliI	no signal	n.a.
480	FBgn0011591	fng	epithelial cells	cytoplasm		1		1
482	FBgn0010389	htl	no signal	n.a.
483	FBgn0028427	Ilk	germ cells and epithelial cells	uniform in all cells
488	FBgn0004635	rho	subset of epithelial cells: anterior/posterior cells	cytoplasm		1		1
492	FBgn0000320	eya	epithelial cells	cytoplasm		1		1
496	FBgn0004054	zen2	no signal	n.a.
497	FBgn0028573	prc	somatic niche cells	extracellular				1
511	FBgn0015946	grim	no signal	n.a.
519	FBgn0264695	Mhc	germ cells and epithelial cells	uniform in all cells
521	FBgn0000625	eyg	subset of epithelial cells: anterior/posterior cells	cytoplasm		1		1
527	FBgn0087007	bbg	epithelial cells	apical cell membrane			1	1
539	FBgn0003459	stwl	germ cells and epithelial cells	uniform in all cells
550	FBgn0000541	E(bx)	germ cells and epithelial cells	nuclear	1			1
565	FBgn0005648	Pabp2	germ cells and epithelial cells	nuclear	1			1
568	FBgn0010341	Cdc42	germ cells and epithelial cells	uniform in all cells
576	FBgn0011655	Med	no signal	n.a.
577	FBgn0262526	vas	germ cells	cytoplasm		1		1
595	FBgn0016075	vkg	epithelial cells	cytoplasm		1		1
601	FBgn0033402	Myd88	germ cells and epithelial cells	uniform in all cells
603	FBgn0035473	mge	germ cells and epithelial cells	germ cells: oocyte enriched, nurse cells aggregates				1
608	FBgn0034068	casp	epithelial cells	cytoplasm		1		1
616	FBgn0029664	CG10802	no signal	n.a.
617	FBgn0028473	Non1	epithelial cells	nuclear	1			1
621	FBgn0021800	Reph	germ cells	cytoplasm		1		1
634	FBgn0033717	CG8839	epithelial cells	cytoplasm		1		1
640	FBgn0028327	l(1)G0320	no signal	n.a.
651	FBgn0022153	l(2)k05819	no signal	n.a.
655	FBgn0267967	corolla	germ cells	oocyte nucleus				1
674	FBgn0003310	S	germ cells	cortical / cell membrane			1	1
681	FBgn0261800	LanB1	epithelial cells	extracellular				1
685	FBgn0052412	QC	germ cells and epithelial cells	nuclear	1			1
691	FBgn0033769	CG8768	germ cells	perinuclear				1
693	FBgn0259243	Pka-R1	dividing germ cells	cytoplasm		1		1
699	FBgn0050404	Tango11	dividing germ cells	cytoplasm		1		1
700	FBgn0002962	nos	germ cells	uniform				1
705	FBgn0024273	WASp	germ cells and epithelial cells	uniform in all cells
713	FBgn0021796	Tor	germ cells and epithelial cells	cytoplasm		1
722	FBgn0016070	smg	germ cells	oocyte enriched				1
733	FBgn0030719	eIF5	germ cells and epithelial cells	uniform in all cells
735	FBgn0263108	BtbVII	germ cells and epithelial cells	nuclear	1			1
739	FBgn0035761	RhoGEF4	no signal	n.a.
921	FBgn0001986	l(2)35Df	germ cells and epithelial cells	nuclear	1			1
927	FBgn0035149	MED30	germ cells and epithelial cells	uniform in all cells
937	FBgn0015777	nrv2	epithelial cells	lateral cell membrane			1	1
958	FBgn0003888	betaTub60D	epithelial cells	cytoplasm		1		1
960	FBgn0001137	grk	germ cells	oocyte enriched / anterior				1
1394	FBgn0003015	osk	germ cells	oocyte enriched / posterior				1
10013	FBgn0031913	CG5958	subset of epithelial cells: sqamous cells	cytoplasm		1		1
10044	FBgn0005386	ash1	germ cells and epithelial cells	nuclear	1			1
10070	FBgn0003317	sax	germ cells and epithelial cells	cortical / cell membrane			1	1
10082	FBgn0026192	par-6	germ cells and epithelial cells	uniform in all cells
10143	FBgn0011020	Sas-4	germ cells and epithelial cells	cytoplasm		1
10152	FBgn0037526	cg10092	germ cells and epithelial cells	in nurse cells: perinuclear				1
10195	FBgn0266671	Sec6	germ cells and epithelial cells	in epithelial cells: cortical / cell membrane			1	1
10202	FBgn0266673	sec10	germ cells and epithelial cells	in epithelial cells: cortical / cell membrane			1	1
10206	FBgn0025700	CG5885	epithelial cells	cytoplasm		1		1
Supplementary Table 3
