# Supplementary material for: A genome-wide resource for the analysis of protein localisation in Drosophila
Source: eLife. 2016 Feb 20;5:e12068. doi: 10.7554/eLife.12068 (PMC4805545; doi:10.7554/eLife.12068)
Supplement: Supplementary file 4. — Table listing the expression pattern for 121 fTRG lines in adult thoraces. Expression was detected in 101 lines by anti-GFP antibody stainings. Cell type specific expression and subcellular localisations were monitored for these lines. DOI: http://dx.doi.org/10.7554/eLife.12068.036 [file elife-12068-supp4.xlsx]

## Sheet: Sheet1
Transfor-mant	Gene	Isoforms	Clone_ID	expression levels thorax	IFM	IFM localisation	leg muscle	leg muscle localisation	tendons IFM	tendon localisation	visceral muscle	visceral muscle localisation	gut epidermis	gut epidermis localisation	trachea IFM	trachea localisation	motorneu-rons IFM	ventral ganglion	ganglion localisation
1	mfas		03355975781483189 A02	low	no	none	no	none	no	none	no	none	no	none	YES	cell membrane	no	YES	n.a.
21	gro		03355975781483189 B08	intermediate	YES	nucleus	YES	nucleus	n.a.	n.a.	YES	nucleus	YES	nucleus	YES	nucleus	n.a.	YES	nucleus
25	numb		03355975781483189 B09	intermediate	no	none	no	none	YES	cell membrane	no	none	YES	cell membrane	YES	cell membrane	no	YES	cell membrane
27	ro		03355975781483189 D05	very low	no	none	no	none	no	none	no	none	YES	nucleus	no	none	no	n.a.	n.a.
29	dl		03355975781483189 C02	low	no	none	YES	nucleus	n.a.	n.a.	no	none	YES	cytoplasm	no	none	no	no	none
31	Rho1		03355975781483189 C06	intermediate	YES	dotty structure - vesicles?	YES	dotty structure - vesicles?	n.a.	n.a.	n.a.	n.a.	YES	cytoplasm	YES	dotty structure - vesicles?	no	n.a.	n.a.
32	BM-40-SPARC		03355975781483189 C12	high	YES	extracellular matrix	YES	extracellular matrix	YES	extracellular matrix	YES	extracellular matrix	YES	extracellular matrix	YES	extracellular matrix	YES	YES	extracellular matrix
34	Mnt		8431894728673938 B08	intermediate	YES	nucleus	YES	nucleus	n.a.	n.a.	YES	nucleus	YES	nucleus	n.a.	n.a.	n.a.	n.a.	n.a.
39	sens		03355975781483189 G09	none	no	none	no	none	no	none	no	none	no	none	no	none	no	n.a.	n.a.
53	pyd3		03355975781483189 D12	intermediate	YES	dotty structure - vesicles?	YES	dotty structure - vesicles?	YES	cytoplasm	YES	cytoplasm	YES	cytoplasm	n.a.	n.a.	YES	YES	cytoplasm
57	CG5625		8431894728673938 A07	high	YES	dotty structure - vesicles?	YES	dotty structure - vesicles?	YES	dotty structure - vesicles?	YES	dotty structure - vesicles?	YES	dotty structure - vesicles?	YES	dotty structure - vesicles?	YES	YES	dotty structure - vesicles?
59	Tsc1		8431894728673938 E01	low	YES	dotty structure - vesicles?	YES	dotty structure - vesicles?	YES	n.a.	YES	dotty structure - vesicles?	YES	dotty structure - vesicles?	n.a.	n.a.	n.a.	YES	n.a.
63	CG31772		6290259782156287 A05	intermediate	YES	Z-disc	YES	Z-disc	no	none	YES	Z-disc	YES	n.a.	no	none	no	YES	cytoplasm
74	Sc2		6290259782156287 E03	intermediate	YES	dotty structure - vesicles?	YES	dotty structure - vesicles?	YES	n.a.	no	none	YES	cytoplasm	YES	cytoplasm	n.a.	YES	cytoplasm
76	CG1021		6290259782156287 B04	intermediate	no	none	no	none	n.a.	n.a.	no	none	YES	cell membrane	YES	cell membrane	no	YES	n.a.
78	Act88F		6290259782156287 D01	high	YES	thin filament	no	none	no	none	no	none	no	none	no	none	no	no	none
84	p53		8431894728673938 D12	low	YES	nucleus	YES	nucleus	n.a.	n.a.	YES	nucleus	YES	nucleus	n.a.	n.a.	n.a.	YES	nucleus
87	Blimp-1		03355975781483189 G04	low	no	none	YES	nucleus	no	none	no	none	YES	nucleus	no	none	no	no	none
91	fj		8431894728673938 H07	very low	no	none	no	none	YES	n.a.	no	none	YES	cytoplasm	no	none	no	n.a.	n.a.
92	CG32121		8431894728673938 A05	high	YES	nucleus	YES	nucleus	no	none	no	none	no	none	no	none	no	n.a.	n.a.
96	GluRIIC		03355975781483189 C07	none	no	none	no	none	no	none	no	none	no	none	no	none	no	n.a.	n.a.
103	CG9336		03355975781483189 D07	high	no	none	no	none	YES	cell membrane	no	none	YES	cell membrane	YES	cell membrane	YES	n.a.	n.a.
105	uzip		03355975781483189 D01	intermediate	no	none	no	none	no	none	no	none	no	none	no	none	YES	YES	cell membrane
108	sty		6290259782156287 C03	intermediate	no	none	no	none	no	none	no	none	YES	dotty structure - vesicles?	no	none	no	no	none
115	E2f2		6290259782156287 F02	intermediate	YES	nucleus	YES	nucleus	YES	nucleus	YES	nucleus	YES	nucleus	n.a.	n.a.	n.a.	YES	nucleus
117	CG2790		6290259782156287 G01	none	no	none	no	none	no	none	no	none	no	none	no	none	no	no	none
125	fray		6290259782156287 H03	high	YES	myofibril	YES	myofibril	no	none	no	none	YES	cytoplasm	no	none	YES	YES	cytoplasm
129	par-6		6745694817474591 E03	intermediate	no	none	no	none	YES	cell membrane	no	none	YES	apical membrane	YES	cell membrane	no	n.a.	n.a.
134	eIF-4E		03355975781483189 D09	intermediate	YES	cytoplasm	YES	cytoplasm	YES	cytoplasm	YES	cytoplasm	YES	cytoplasm	YES	cytoplasm	YES	YES	cytoplasm
137	crb		6745694817474591 C04	intermediate	no	none	no	none	YES	cell membrane	no	none	YES	apical membrane	YES	cell membrane	no	n.a.	n.a.
139	hb		6745694817474591 H05	intermediate	no	none	YES	nucleus	no	none	YES	nucleus	no	none	n.a.	n.a.	n.a.	n.a.	n.a.
142	aop		03355975781483189 F06	low	no	none	no	none	no	none	YES	nucleus	YES	nucleus	no	none	no	n.a.	n.a.
144	pain		24648923033663195 G03	intermediate	no	none	no	none	YES	cell membrane	no	none	YES	cell membrane	no	none	YES	YES	n.a.
145	Mmp1		24648923033663195 G11	intermediate	no	none	no	none	no	none	no	none	no	none	YES	extracellular matrix	no	n.a.	n.a.
147	CG15715		8431894728673938 F05	low	no	none	no	none	no	none	no	none	YES	cytoplasm	no	none	no	n.a.	n.a.
150	tan		5827172721875329 A12	very low	no	none	YES	nucleus	no	none	YES	n.a.	YES	cytoplasm	no	none	YES	YES	cytoplasm
151	orb2		5827172721875329 A10	low	no	none	no	none	no	none	no	none	YES	cytoplasm	no	none	no	YES	n.a.
156	CLIP-190		8431894728673938 B09	intermediate	no	none	YES	dotty structure - vesicles?	no	none	no	none	YES	dotty structure - vesicles?	no	none	no	YES	n.a.
158	ergic53		24648923033663195 H11	intermediate	no	none	no	none	no	none	no	none	YES	dotty structure - vesicles?	no	none	no	no	none
161	myoglianin		6196214900843875 E05	very low	no	none	no	none	no	none	no	none	YES	nucleus	no	none	no	n.a.	n.a.
165	salm		6196214900843875 H05	very low	YES	nucleus	YES	nucleus	no	none	no	none	no	none	n.a.	n.a.	n.a.	no	none
166	dei		06656881586833885 H04	very low	no	none	YES	nucleus	no	none	no	none	no	none	no	none	no	n.a.	n.a.
182	vri		6290259782156287 C04	intermediate	YES	nucleus	YES	nucleus	n.a.	n.a.	YES	nucleus	YES	nucleus	n.a.	n.a.	n.a.	YES	nucleus
220	scrt		014526891357111271 F02	low	no	none	no	none	no	none	no	none	no	none	n.a.	n.a.	n.a.	YES	nucleus
276	CG12118		7778023793434855 E04	high	YES	mitochondria	YES	mitochondria	n.a.	n.a.	YES	mitochondria	YES	mitochondria	n.a.	n.a.	n.a.	YES	mitochondria
286	CG9312		7778023793434855 D08	very low	no	none	YES	dotty structure - vesicles?	no	none	no	none	YES	nucleus	no	none	no	n.a.	n.a.
288	CG7182		7778023793434855 H08	low	no	none	no	none	no	none	no	none	YES	cytoplasm	no	n.a.	YES	YES	cytoplasm
290	Pp1alpha-96A		7778023793434855 F11	intermediate	no	none	no	none	YES	cytoplasm	no	none	YES	cytoplasm	no	none	YES	YES	cytoplasm
444	babo		014526891357111271 A07	intermediate	YES	dotty structure - vesicles?	YES	dotty structure - vesicles?	YES	cell membrane	YES	cell membrane	YES	cell membrane	YES	cell membrane	YES	YES	cell membrane
448	Pdk1		7144464337096436 H02	low	no	none	no	none	no	none	YES	nucleus	YES	cytoplasm	no	none	no	n.a.	n.a.
449	Hml		7778023793434855 E09	none	no	none	no	none	no	none	no	none	no	none	no	none	no	n.a.	n.a.
453	l(1)G0230		7778023793434855 E06	none	no	none	no	none	no	none	no	none	no	none	no	none	no	n.a.	n.a.
455	Tim8		7144464337096436 A11	none	no	none	no	none	no	none	no	none	no	none	no	none	no	n.a.	n.a.
456	chico		7778023793434855 H07	intermediate	no	none	no	none	no	none	no	none	YES	cell membrane	no	none	no	no	none
463	CG32667		8431894728673938 F03	none	no	none	no	none	no	none	no	none	no	none	no	none	no	n.a.	n.a.
467	fliI		7778023793434855 E07	none	no	none	no	none	no	none	no	none	no	none	no	none	no	n.a.	n.a.
471	Mf	Iso L, O, M	6744927827587379 B02	none	no	none	no	none	no	none	no	none	no	none	no	none	no	n.a.	n.a.
475	Prm	Iso A, B, C, D	6744927827587379 D01	high	YES	M-line	YES	thick filament	no	none	YES	thick filament	no	none	no	none	no	no	none
478	Fhos		6744927827587379 D02	none	no	none	no	none	no	none	no	none	no	none	no	none	no	no	none
481	Mp20		17337204868928058 B04	intermediate	no	none	YES	cytoplasm	no	none	YES	cytoplasm	no	none	no	none	no	n.a.	n.a.
483	Ilk		8921672467940407 B06	intermediate	YES	muscle attachment site	YES	muscle attachment site	YES	n.a.	n.a.	n.a.	YES	n.a.	no	none	YES	n.a.	n.a.
484	TpnC4		7778023793434855 B04	none	no	none	no	none	no	none	no	none	no	none	no	none	no	n.a.	n.a.
485	org-1		1582528031925018 E07	none	no	none	no	none	no	none	no	none	no	none	no	none	no	n.a.	n.a.
486	mask		23029740539567312 D06	intermediate	YES	Z-disc	YES	dotty structure - vesicles?	no	none	no	none	YES	nucleus	no	none	no	YES	cytoplasm
488	rho		014526891357111271 C02	none	no	none	no	none	no	none	no	none	no	none	no	none	no	n.a.	n.a.
492	eya		9077719496880051 C06	none	no	none	no	none	no	none	no	none	no	none	no	none	no	n.a.	n.a.
495	sas		014526891357111271 E08	none	no	none	no	none	no	none	no	none	no	none	no	none	no	no	none
500	Mhc	Iso K, L, M	6744927827587379 G01	high	YES	thick filament	YES	thick filament	no	none	YES	thick filament	no	none	no	none	no	no	none
501	Mf	Iso A, G, N	6744927827587379 A02	high	YES	thick filament	YES	thick filament	no	none	YES	thick filament	no	none	no	none	no	no	none
502	dlg1		6744927827587379 C01	high	YES	T-tubules, cell membrane	YES	cell membrane	YES	n.a.	YES	cell membrane	YES	cell membrane	no	none	YES	YES	n.a.
514	Pink1		03355975781483189 C05	none	no	none	no	none	no	none	no	none	no	none	no	none	no	n.a.	n.a.
516	cact		23029740539567312 E01	intermediate	YES	neuromuscular junction	YES	neuromuscular junction	YES	cytoplasm	YES	neuromuscular junction	YES	cytoplasm	no	none	YES	n.a.	n.a.
519	Mhc	Iso A, F, G etc.	17337204868928058 C04	high	no	none	YES	thick filament	no	none	YES	thick filament	no	none	no	none	no	n.a.	n.a.
565	Pabp2		1708059145882148 H03	low	no	none	no	none	YES	n.a.	YES	nucleus	YES	nucleus	no	none	no	YES	nucleus
568	Cdc42		1582528031925018 H07	intermediate	no	none	no	none	YES	cell membrane	no	none	YES	cell membrane	YES	cell membrane	YES	YES	cell membrane
569	Kettin / sls		6744927827587379 D03	high	YES	Z-disc	YES	Z-disc	no	none	YES	Z-disc	no	none	no	none	no	n.a.	n.a.
570	Adar		6744927827587379 C03	intermediate	YES	nucleus	YES	nucleus	no	none	YES	nucleus	YES	nucleus	no	none	no	YES	nucleus
574	LanA		6196214900843875 D06	high	YES	extracellular matrix	YES	extracellular matrix	YES	extracellular matrix	YES	extracellular matrix	YES	extracellular matrix	YES	extracellular matrix	YES	n.a.	n.a.
576	Med		06656881586833885 B11	low	no	none	no	none	YES	cytoplasm	no	none	YES	cytoplasm	no	none	no	YES	cytoplasm
579	Lis-1		7778023793434855 G01	low	no	none	no	none	no	none	no	none	YES	dotty structure - vesicles?	no	none	YES	YES	n.a.
584	Lmpt		6744927827587379 E02	intermediate	no	none	YES	I-band	YES	cytoplasm	YES	I-band	no	none	no	none	no	n.a.	n.a.
585	hts		6744927827587379 B03	high	YES	dotty structure - vesicles?	YES	dotty structure - vesicles?	YES	cell membrane	no	none	YES	cell membrane	no	none	YES	YES	n.a.
587	rhea	Iso B, E, F	6744927827587379 G02	high	YES	muscle attachment site	YES	muscle attachment site	YES	muscle attachment site	YES	Z-disc	YES	cell membrane	YES	cell membrane	YES	YES	cell membrane
595	vkg		9854504803824267 E08	low	no	none	no	none	no	none	no	none	YES	extracellular matrix	no	none	no	YES	extracellular matrix
600	sqh		6290259782156287 H07	intermediate	no	none	no	none	YES	cell membrane	no	none	YES	cell membrane	YES	cell membrane	YES	YES	n.a.
602	Tango1		8921672467940407 E01	intermediate	no	none	no	none	no	none	no	none	YES	dotty structure - vesicles?	no	none	no	YES	dotty structure - vesicles?
678	Mlp84B		9077719496880051 B07	intermediate	no	none	YES	Z-disc	no	none	YES	Z-disc	no	none	no	none	no	n.a.	n.a.
679	mib2		24648923033663195 A11	none	no	none	no	none	no	none	no	none	no	none	no	none	no	no	none
680	zormin		6744927827587379 C02	none	no	none	no	none	no	none	no	none	no	none	no	none	no	no	none
681	LanB1		23029740539567312 H12	high	YES	extracellular matrix	YES	extracellular matrix	YES	extracellular matrix	YES	extracellular matrix	YES	extracellular matrix	YES	extracellular matrix	YES	n.a.	n.a.
699	Tango11		9854504803824267 F04	intermediate	YES	dotty structure - vesicles?	YES	dotty structure - vesicles?	YES	dotty structure - vesicles?	YES	dotty structure - vesicles?	YES	dotty structure - vesicles?	YES	dotty structure - vesicles?	n.a.	YES	dotty structure - vesicles?
703	Lmpt		6744927827587379 F02	intermediate	YES	cytoplasm	no	none	no	none	no	none	no	none	no	none	no	n.a.	n.a.
709	Mlp60A	Iso E, F	6744927827587379 F03	low	no	none	YES	Z-disc	no	none	YES	Z-disc	no	none	no	none	no	n.a.	n.a.
731	rhea	Iso C, D	6744927827587379 H02	intermediate	no	none	YES	Z-disc	no	none	YES	Z-disc	no	none	YES	cell membrane	no	no	none
876	fln		8921672467940407 D08	intermediate	YES	thick filament	no	none	no	none	no	none	no	none	no	none	no	n.a.	n.a.
925	wupA		2733665080679012 B04	intermediate	no	none	YES	thin filament	no	none	YES	thin filament	no	none	no	none	no	n.a.	n.a.
932	mys		5827172721875329 D11	intermediate	YES	muscle attachment site	YES	muscle attachment site	YES	cell membrane	no	none	YES	cell membrane	no	none	no	n.a.	n.a.
1046	Unc-89		6536462692990512 G05	intermediate	YES	M-line	YES	M-line	no	none	YES	M-line	no	none	no	none	no	n.a.	n.a.
1257	TpnC25D		8332520144274483 C10	intermediate	no	none	YES	thin filament	no	none	YES	thin filament	no	none	no	none	no	n.a.	n.a.
10010	Hsp83		6329535328138883 A04	high	YES	myofibril	YES	myofibril	YES	cytoplasm	YES	cytoplasm	YES	cytoplasm	YES	cytoplasm	YES	n.a.	n.a.
10013	CG5958		4562672055690222 B10	none	no	none	no	none	no	none	no	none	no	none	n.a.	n.a.	n.a.	no	none
10017	CG5885		9180222713131253 D02	intermediate	no	none	YES	dotty structure - vesicles?	no	none	no	none	YES	cytoplasm	no	none	YES	YES	cytoplasm
10028	Act88F		9180222713131253 D01	high	YES	thin filament	no	none	no	none	no	none	no	none	no	none	no	n.a.	n.a.
10032	fray		9180222713131253 H03	high	YES	myofibril	YES	myofibril	no	none	no	none	YES	cytoplasm	no	none	YES	YES	cytoplasm
10035	CG17912		9180222713131253 G06	high	YES	nucleus	YES	nucleus	YES	nucleus	YES	nucleus	YES	nucleus	n.a.	n.a.	n.a.	YES	nucleus
10036	CG12391		3015068842848645 A04	high	YES	nucleus	YES	nucleus	YES	nucleus	YES	nucleus	YES	nucleus	n.a.	n.a.	n.a.	YES	nucleus
10039	Sc2		9180222713131253 E03	intermediate	YES	dotty structure - vesicles?	YES	dotty structure - vesicles?	YES	n.a.	no	none	YES	cytoplasm	YES	cytoplasm	n.a.	YES	cytoplasm
10041	CG11617		6329535328138883 C08	intermediate	YES	nucleus	YES	nucleus	YES	n.a.	YES	nucleus	YES	nucleus	n.a.	n.a.	n.a.	n.a.	n.a.
10059	CG32121		3015068842848645 A05	intermediate	YES	nucleus	YES	nucleus	no	none	no	none	no	none	no	none	no	YES	n.a.
10070	sax		6329535328138883 D05	high	YES	T-tubules, cell membrane	YES	cell membrane	n.a.	n.a.	YES	cell membrane	YES	cell membrane	no	none	no	n.a.	n.a.
10075	sqh		9180222713131253 H07	intermediate	no	none	no	none	YES	cell membrane	no	none	YES	cell membrane	YES	cell membrane	YES	YES	cell membrane
10085	crb		6329535328138883 C04	low	no	none	no	none	YES	cell membrane	no	none	YES	apical membrane	YES	cell membrane	no	n.a.	n.a.
10125	veli		6329535328138883 H03	high	YES	neuromuscular junction	YES	neuromuscular junction	no	none	no	none	no	none	no	none	YES	YES	cytoplasm
10141	ebi		33294093041722905 A06	very low	no	none	no	none	no	none	no	none	YES	nucleus	no	none	no	n.a.	n.a.
10149	Blimp-1		33294093041722905 G04	intermediate	YES	nucleus	YES	nucleus	YES	n.a.	YES	nucleus	YES	nucleus	YES	nucleus	n.a.	YES	nucleus
10163	Hand		07323567509660489 C02	low	no	none	no	none	no	none	YES	nucleus	no	none	no	none	no	n.a.	n.a.
10174	CG5625		7654110682321876 A07	intermediate	YES	nucleus (nls-GFP)	YES	nucleus (nls-GFP)	YES	nucleus (nls-GFP)	YES	nucleus (nls-GFP)	YES	nucleus (nls-GFP)	YES	nucleus (nls-GFP)	n.a.	YES	nucleus (nls-GFP)
10199	CG2157		7654110682321876 F01	none	no	none	no	none	no	none	no	none	no	none	no	none	no	no	none
10236	rhea		2027191068155202 F10	low	YES	nucleus (nls-GFP)	YES	nucleus (nls-GFP)	YES	n.a.	YES	nucleus (nls-GFP)	YES	nucleus (nls-GFP)	no	none	no	YES	n.a.
10243	Khc		2027191068155202 E09	low	YES	nucleus (nls-GFP)	YES	nucleus (nls-GFP)	YES	n.a.	YES	nucleus (nls-GFP)	YES	nucleus (nls-GFP)	n.a.	n.a.	n.a.	n.a.	n.a.
10251	CG6509		1522781026558664 B11	low	YES	dotty structure - vesicles?	no	none	YES	cell membrane	no	none	YES	cell membrane	YES	cell membrane	YES	n.a.	n.a.
				Sarov et al. Supplementary Table 6
