# Supplementary material for: A genome-wide resource for the analysis of protein localisation in Drosophila
Source: eLife. 2016 Feb 20;5:e12068. doi: 10.7554/eLife.12068 (PMC4805545; doi:10.7554/eLife.12068)
Supplement: Supplementary file 5. — Quantitative mass spectrometry values of all detected protein obtained with the MaxQuant software suite for all the GFP-enrichment experiments are listed. DOI: http://dx.doi.org/10.7554/eLife.12068.037 [file elife-12068-supp5.xlsx]

## Sheet: proteinGroups
24-28hAPF_white_control_01	24-28hAPF_white_control_02	24-28hAPF_white_control_03	24-28hAPF_483_Ilk_01	24-28hAPF_483_Ilk_02	24-28hAPF_483_Ilk_03	24-28hAPF_501_Mhc_01	24-28hAPF_501_Mhc_02	24-28hAPF_501_Mhc_04	24-28hAPF_502_Dlg1_01	24-28hAPF_502_Dlg1_03	24-28hAPF_502_Dlg1_04	24-28hAPF_587_Rhea-Talin_01	24-28hAPF_587_Rhea-Talin_02	24-28hAPF_587_Rhea-Talin_04	24-28hAPF_681_LanB1_01	24-28hAPF_681_LanB1_02	24-28hAPF_681_LanB1_03	3-7dAdult_white_control_01	3-7dAdult_white_control_02	3-7dAdult_white_control_04	3-7dAdult_483_Ilk_01	3-7dAdult_483_Ilk_02	3-7dAdult_483_Ilk_03	3-7dAdult_501_Mhc_01	3-7dAdult_501_Mhc_02	3-7dAdult_501_Mhc_04	3-7dAdult_502_Dlg1_02	3-7dAdult_502_Dlg1_03	3-7dAdult_502_Dlg1_04	3-7dAdult_587_Rhea-Talin_01	3-7dAdult_587_Rhea-Talin_02	3-7dAdult_587_Rhea-Talin_04	3-7dAdult_681_LanB1_01	3-7dAdult_681_LanB1_02	3-7dAdult_681_LanB1_03	MS/MS Count 24-28hAPF_white_control_01	MS/MS Count 24-28hAPF_white_control_02	MS/MS Count 24-28hAPF_white_control_03	MS/MS Count 24-28hAPF_483_Ilk_01	MS/MS Count 24-28hAPF_483_Ilk_02	MS/MS Count 24-28hAPF_483_Ilk_03	MS/MS Count 24-28hAPF_501_Mhc_01	MS/MS Count 24-28hAPF_501_Mhc_02	MS/MS Count 24-28hAPF_501_Mhc_04	MS/MS Count 24-28hAPF_502_Dlg1_01	MS/MS Count 24-28hAPF_502_Dlg1_03	MS/MS Count 24-28hAPF_502_Dlg1_04	MS/MS Count 24-28hAPF_587_Rhea-Talin_01	MS/MS Count 24-28hAPF_587_Rhea-Talin_02
20.8788	NaN	21.3022	20.7735	20.0074	21.0912	NaN	NaN	NaN	NaN	NaN	NaN	20.5677	NaN	NaN	NaN	NaN	NaN	22.9215	23.7399	21.2515	22.1382	22.4546	20.1027	22.1259	24.2842	23.5648	22.9425	21.5806	23.0689	21.8905	23.1039	22.214	21.7162	21.8339	21.8562	0	0	0	0	0	0	0	0	0	0	0	0	0	0
NaN	NaN	NaN	NaN	NaN	NaN	NaN	NaN	NaN	NaN	NaN	NaN	NaN	NaN	NaN	NaN	NaN	NaN	19.3081	19.1812	18.1843	19.0181	18.942	NaN	21.8819	22.2351	20.4003	19.2577	18.9704	18.8575	19.2431	19.0828	18.8172	18.9985	19.2847	19.039	0	0	0	0	0	0	0	0	0	0	0	0	0	0
20.0997	19.0837	19.5709	17.5525	17.1472	17.8448	17.4053	NaN	NaN	NaN	18.0235	NaN	18.3134	17.9165	17.8829	19.9559	17.2188	19.5952	NaN	NaN	21.101	20.6054	20.0795	20.9193	19.8645	19.9755	19.7988	19.9113	20.175	19.5728	20.4954	20.9681	21.8855	20.6069	19.2708	18.511	0	2	1	0	0	0	0	0	0	0	0	0	0	0
22.9484	22.4694	22.3215	22.8332	22.7782	22.2041	20.0033	20.3012	22.1211	22.4333	21.3271	21.705	21.4507	22.2685	21.8305	19.7768	20.4053	18.9862	18.154	17.2602	18.4163	18.8546	19.0969	18.1526	19.9538	19.4238	NaN	19.095	19.2631	19.6705	19.8654	19.5542	19.3272	19.0852	19.5321	19.3074	1	1	1	1	1	1	1	1	1	1	1	1	1	1
19.9317	19.9668	19.7162	20.075	19.8866	20.2802	19.7295	20.327	20.2013	19.664	19.9764	20.4794	20.2186	19.5525	19.8212	21.6446	22.1033	22.3185	NaN	19.14	18.9829	NaN	19.102	19.5817	19.6097	19.5703	19.3228	NaN	NaN	NaN	19.0306	18.8979	18.6598	NaN	18.9822	NaN	0	1	1	0	0	1	1	1	0	0	1	1	1	0
NaN	NaN	NaN	NaN	NaN	17.1916	NaN	NaN	NaN	NaN	NaN	NaN	NaN	NaN	NaN	NaN	NaN	NaN	NaN	NaN	NaN	NaN	NaN	NaN	21.0461	19.1105	20.2517	NaN	NaN	NaN	NaN	NaN	NaN	NaN	NaN	NaN	0	0	0	1	0	0	0	0	0	0	0	0	0	0
22.7531	22.7345	24.2016	25.0881	24.8129	25.4442	24.7483	23.3131	23.0111	24.7765	24.0987	24.34	25.7882	24.7936	25.5145	22.3207	22.7599	23.4162	18.5437	19.376	18.8227	18.6787	18.4602	19.6759	19.7136	21.2688	19.6327	18.8647	18.4598	19.2002	19.3619	19.2798	NaN	19.1442	19.7349	19.1665	0	1	2	4	4	5	3	1	1	4	3	2	6	3
21.3911	21.3776	21.9697	22.3217	21.5206	22.2008	22.461	22.8201	22.3752	22.213	22.1665	22.3558	21.6267	22.4589	21.8976	20.9702	20.5115	20.8636	22.9237	22.6296	22.5941	22.4647	22.2063	22.6204	20.0084	20.9505	21.6012	22.9835	22.58	22.5799	22.378	22.3168	22.1107	22.0628	22.076	21.6386	0	0	0	1	1	0	0	1	1	0	1	1	1	1
20.185	20.5168	20.7978	19.5769	20.2699	19.2871	20.2314	19.807	19.8482	20.555	19.3594	18.5476	19.7447	20.0979	19.8684	18.8608	19.2103	19.3735	20.5241	21.5968	21.9548	20.0485	21.3836	NaN	21.3607	21.7893	21.2477	20.0039	19.9872	19.92	22.0078	22.2669	21.6052	20.0925	19.6213	19.5927	0	0	0	0	0	0	0	0	0	0	0	0	0	0
18.0777	NaN	17.3977	18.1785	18.0607	NaN	NaN	NaN	18.4977	17.401	17.9003	17.9796	18.1039	NaN	NaN	NaN	17.9091	NaN	NaN	17.8325	NaN	NaN	NaN	NaN	NaN	20.074	18.6691	17.9392	17.8148	18.5019	NaN	NaN	NaN	NaN	NaN	18.2778	0	0	0	0	0	0	0	0	0	0	0	0	0	0
34.7698	34.8503	35.6593	35.7828	35.515	35.463	35.9931	35.3318	35.8672	35.6864	35.7189	35.7848	35.4538	35.6965	36.0087	34.6048	34.4193	34.7287	23.3239	22.9009	17.5071	18.2923	18.0606	18.706	15.8944	17.3331	16.6436	18.744	16.4657	17.7107	18.3041	17.7968	22.0022	21.8103	17.8257	18.2466	104	109	112	132	133	123	124	130	130	126	130	141	118	137
19.0127	19.465	20.8664	21.1256	22.3661	21.3541	19.6536	19.5166	21.1642	22.2715	20.1623	20.6599	NaN	21.1993	21.1316	20.808	20.9457	20.7125	NaN	19.3204	19.2315	19.2527	20.1927	NaN	19.1594	19.0501	NaN	20.2057	20.1376	19.8664	21.4362	19.4996	22.1127	19.5532	19.9286	19.4498	0	0	0	0	1	0	0	0	0	1	0	0	0	0
22.9374	23.6993	21.7446	20.8617	21.5082	21.0699	20.7436	22.2692	21.536	21.2834	21.5755	21.277	21.9033	21.4148	22.1662	22.7072	21.6158	23.2197	20.1959	20.312	20.7448	20.6143	20.0208	21.204	21.8848	22.4603	22.5552	20.0865	19.8622	20.9064	21.135	21.0444	19.8054	21.817	21.3683	21.8516	2	2	1	0	2	1	0	2	1	0	0	1	2	2
19.7582	19.379	20.0259	19.9259	19.6065	19.6056	19.9255	19.3124	19.4142	19.7902	19.1747	19.631	19.7886	19.8571	19.744	NaN	19.7927	NaN	21.7769	20.1813	20.0266	21.0621	21.3154	19.9687	19.9533	19.7378	19.6099	20.4134	21.3817	20.4975	21.3304	21.4394	19.5386	20.4147	20.1986	20.2065	0	0	0	0	0	0	0	0	0	0	0	0	0	0
22.1174	21.4988	21.3715	20.9961	21.0039	21.1599	20.9145	20.5757	21.2731	21.5603	22.1743	21.8639	21.2989	21.8357	22.1334	24.568	23.4864	21.5577	19.9974	20.615	19.1291	21.2529	20.8627	19.7377	NaN	NaN	22.2783	20.67	20.6005	21.3638	20.7846	20.847	20.6686	21.9011	20.6912	21.47	1	1	1	0	0	0	1	0	0	0	0	2	0	0
19.3852	19.2932	19.275	19.4653	19.5251	19.0023	22.8524	21.8508	20.4506	19.4411	NaN	19.9402	19.3281	NaN	NaN	NaN	NaN	NaN	NaN	19.2159	18.9176	19.2308	NaN	NaN	NaN	19.4769	NaN	19.2186	19.3891	19.2947	19.9858	19.7631	19.3123	NaN	19.8931	20.0592	0	0	0	0	0	0	1	2	0	0	0	0	0	0
20.1104	20.4757	20.1406	NaN	19.0501	19.7344	20.6766	20.2024	19.9666	19.422	20.1652	19.363	20.1371	NaN	20.2792	NaN	NaN	NaN	19.5772	19.7213	19.7623	19.2948	19.6145	19.1956	19.0765	NaN	18.5812	20.1441	20.0635	19.89	19.3928	19.4774	19.3781	19.306	19.0984	18.8396	0	1	0	0	0	0	0	0	0	0	1	0	0	0
NaN	18.3434	17.8057	17.9634	18.7176	17.9213	17.6894	NaN	17.7532	17.9238	17.5045	17.825	17.7172	17.5733	17.888	17.7108	NaN	NaN	21.3397	20.9876	20.5801	19.692	NaN	19.3618	22.8651	21.7992	23.2492	19.5317	20.6415	19.316	18.7229	19.6031	19.2765	19.9243	NaN	21.1039	0	0	0	0	0	0	0	0	0	0	0	0	0	0
NaN	NaN	NaN	NaN	NaN	NaN	NaN	NaN	NaN	NaN	20.7488	NaN	NaN	20.2313	NaN	20.3763	21.1574	20.9351	NaN	NaN	NaN	NaN	NaN	NaN	NaN	NaN	NaN	NaN	NaN	NaN	NaN	NaN	NaN	NaN	NaN	NaN	0	0	0	0	0	0	0	0	0	0	0	0	0	0
21.9671	22.0383	21.2817	21.5419	20.654	20.7321	22.0015	22.9385	23.0329	21.9886	21.9871	21.3951	20.4066	21.6859	21.9248	22.7057	22.7971	22.4497	24.8855	24.7682	24.7894	24.5649	24.6678	24.9239	25.3848	25.4678	25.48	24.5463	24.3498	24.5469	24.561	24.9122	24.0815	25.0367	25.2586	25.0201	1	0	1	0	0	0	0	1	1	0	0	0	0	0
NaN	NaN	NaN	17.7647	17.806	17.4196	NaN	NaN	17.3174	NaN	NaN	17.6601	NaN	17.6816	NaN	21.2296	19.3263	21.2157	NaN	NaN	17.7958	17.8947	18.0813	NaN	19.2323	NaN	18.9469	17.2896	17.4763	17.7346	17.9061	17.6294	17.3799	20.3529	19.3162	20.8522	0	0	0	0	0	0	0	0	0	0	0	0	0	0
20.8932	21.0701	20.6891	20.4307	20.9683	20.2507	20.8406	20.8579	21.1232	20.6707	20.8243	20.6236	20.8304	20.5658	20.7253	22.0752	21.8675	22.3679	19.5987	19.214	19.2954	19.5442	19.6098	20.0094	21.498	21.0701	21.6323	19.5508	19.3172	19.3175	19.2755	19.0751	18.9168	20.1338	20.2363	20.0477	1	1	1	1	1	2	1	1	2	1	1	1	1	0
20.3469	20.0044	20.4242	19.8966	18.5885	19.5803	NaN	20.125	20.5644	NaN	NaN	NaN	NaN	20.1183	20.2216	23.2808	23.6072	24.6502	NaN	NaN	NaN	NaN	NaN	NaN	19.6562	NaN	NaN	NaN	NaN	NaN	NaN	NaN	NaN	19.6016	19.4934	NaN	0	0	0	0	0	0	0	0	0	0	0	0	0	0
19.7601	18.5064	18.298	18.2508	18.1252	18.3093	19.0086	18.6783	17.7754	19.0167	18.8162	18.5188	18.2499	18.32	18.6057	NaN	NaN	NaN	21.5312	21.8402	20.011	19.474	18.3324	17.9039	20.9549	20.3859	20.2019	18.9533	18.7774	18.4473	18.3937	18.4243	18.0913	19.6776	18.6684	18.6051	0	0	0	0	0	0	0	0	0	0	0	0	0	0
18.3854	19.1612	19.1199	NaN	18.7993	19.0046	18.8888	18.9561	19.0757	18.875	18.8342	NaN	18.832	18.9016	18.9261	19.2228	NaN	19.0979	NaN	NaN	NaN	NaN	NaN	NaN	20.4267	19.3002	19.28	NaN	NaN	NaN	NaN	NaN	NaN	NaN	NaN	NaN	0	0	0	0	0	0	0	0	0	0	0	0	0	0
18.7702	19.2258	18.9875	18.3024	18.4449	17.3382	18.911	18.8248	18.5611	19.6942	18.9414	18.5133	NaN	18.79	18.5312	NaN	17.954	17.8035	25.5132	25.8914	24.5648	24.5681	25.9085	26.3613	25.1656	25.0119	24.6511	25.3837	25.4788	24.8052	25.0703	25.495	26.2007	26.255	25.2262	25.1058	0	0	0	0	0	0	0	0	0	0	0	0	0	0
NaN	NaN	NaN	NaN	NaN	NaN	NaN	NaN	NaN	NaN	NaN	NaN	NaN	NaN	NaN	NaN	NaN	NaN	18.397	18.553	NaN	18.435	18.2442	NaN	21.0774	19.5257	19.8154	NaN	NaN	NaN	19.1218	NaN	NaN	19.2139	18.7633	18.328	0	0	0	0	0	0	0	0	0	0	0	0	0	0
17.4493	16.4271	16.6383	16.8211	NaN	17.4737	17.8466	17.4237	18.2776	17.6228	NaN	NaN	17.4904	NaN	17.8272	NaN	NaN	NaN	19.7098	18.4318	18.0397	19.1775	18.6512	19.4374	NaN	NaN	NaN	18.1342	18.9956	NaN	19.0238	18.7696	19.3562	18.9428	18.7711	19.0934	0	0	0	0	0	0	0	0	0	0	0	0	0	0
NaN	NaN	NaN	NaN	NaN	NaN	NaN	NaN	NaN	NaN	NaN	NaN	NaN	NaN	NaN	NaN	NaN	NaN	18.8511	18.834	18.9395	18.6111	NaN	18.4529	NaN	NaN	NaN	19.422	18.1738	NaN	18.4616	18.8773	18.5068	18.6032	18.0583	17.7912	0	0	0	0	0	0	0	0	0	0	0	0	0	0
NaN	20.3022	NaN	NaN	NaN	NaN	NaN	NaN	NaN	NaN	NaN	NaN	NaN	NaN	NaN	21.1755	20.8574	20.794	NaN	NaN	NaN	NaN	NaN	NaN	20.0164	20.2831	20.2951	NaN	NaN	NaN	NaN	NaN	NaN	NaN	NaN	NaN	0	1	0	0	0	0	0	0	0	0	0	0	0	0
23.6948	23.9583	23.9091	24.2534	24.102	24.2064	24.1885	24.1608	24.5445	24.4759	24.4554	24.1929	24.8047	25.1454	24.6171	23.8109	23.4529	23.313	26.37	26.2283	27.2574	26.4224	26.8411	26.7694	25.5204	25.9034	25.5238	26.7582	26.6351	26.9111	26.6852	26.8316	26.712	26.4322	26.3164	26.0902	1	2	1	4	2	1	1	1	1	2	4	0	7	7
21.1927	22.9045	20.9308	22.517	22.9985	22.4317	22.4763	21.8703	22.7447	22.5723	21.5952	19.6415	21.4739	21.8599	20.63	20.8388	21.7041	21.5819	21.1059	22.318	21.8192	22.4606	25.5884	20.9149	21.809	22.1523	19.6633	23.3673	24.2661	23.1054	24.7647	24.9162	22.9677	22.4485	21.4638	21.6242	0	1	0	1	2	1	1	1	1	1	0	0	0	1
20.4645	21.0216	20.7934	20.698	20.1062	20.0281	18.8503	21.5086	21.6007	19.1471	19.8497	19.7015	20.3642	21.769	20.0197	22.7581	23.8096	20.1682	21.5289	22.1883	24.8399	23.9943	24.8615	23.3801	24.0933	23.2805	23.5635	25.1288	25.4282	26.3341	26.0871	24.4243	27.0621	25.5361	26.0067	26.4756	0	0	0	0	0	0	0	0	0	0	0	0	0	0
22.904	21.4747	22.3637	20.975	21.082	21.3587	20.6929	21.222	20.9334	19.9367	20.3645	21.3105	20.4304	21.0521	20.7239	21.3165	22.3026	22.2386	20.7578	22.2195	20.8861	21.0395	20.6575	20.6906	22.2334	22.8773	22.7718	20.5932	20.4231	20.4096	21.4779	20.6839	20.4528	21.896	21.557	21.6307	1	0	1	0	0	0	0	0	0	0	0	0	0	0
19.0245	19.0618	19.0397	18.7659	19.0248	19.2679	18.8337	19.2526	18.5787	19.5006	NaN	NaN	NaN	18.3975	18.7154	18.5466	NaN	17.9185	21.3681	19.9713	21.2404	21.3974	21.446	19.9391	NaN	19.1475	NaN	21.5683	21.25	20.7727	19.8944	19.8652	20.48	20.0515	20.8063	20.7616	0	0	0	0	0	0	0	0	0	0	0	0	0	0
22.2242	22.171	20.0539	22.2446	21.2295	22.0596	21.6517	22.9917	22.3183	21.1892	22.327	22.305	21.7356	19.6297	19.5328	23.3572	22.8365	24.5213	18.4648	NaN	18.4312	NaN	NaN	NaN	NaN	19.2846	18.6283	18.5579	NaN	NaN	NaN	18.4212	NaN	19.0021	NaN	NaN	2	1	0	1	0	1	1	1	2	0	1	1	1	0
20.3266	20.6996	21.6602	21.2134	21.0365	20.9879	19.4104	NaN	20.7626	19.3437	NaN	NaN	NaN	NaN	NaN	NaN	NaN	NaN	20.5584	20.2642	20.7241	21.752	22.0674	20.7016	21.1828	22.3815	21.2128	21.3243	21.1485	22.1661	21.1106	21.6342	21.2124	21.3619	21.9952	22.0819	0	0	0	0	0	0	0	0	0	0	0	0	0	0
22.7713	23.4816	24.724	23.4898	23.5873	23.3512	25.5019	25.2777	25.8593	25.2276	24.775	24.9946	24.1742	24.8355	24.8454	22.6817	NaN	NaN	NaN	NaN	NaN	NaN	NaN	NaN	NaN	NaN	NaN	NaN	NaN	NaN	NaN	NaN	NaN	NaN	NaN	NaN	0	0	1	0	0	0	1	1	1	1	2	2	0	1
19.5869	20.1259	21.4372	22.0669	19.6318	22.7411	21.467	21.9602	21.2081	20.8499	21.9548	21.7093	19.2998	20.9267	23.6061	21.244	18.4296	19.4195	20.0735	23.0639	23.3361	21.9236	24.4104	21.6245	19.6492	19.6119	19.1831	22.6365	23.4179	22.5339	23.289	23.2195	21.8884	22.0985	22.7839	22.7217	0	0	0	1	0	1	0	0	0	0	1	0	0	0
22.9355	22.3403	23.2355	21.6907	21.8138	21.0806	NaN	17.2169	NaN	NaN	17.0204	17.449	18.8297	NaN	16.8871	NaN	17.8737	NaN	25.6403	24.728	26.8553	26.6828	26.5658	26.1827	24.9963	24.8626	24.6216	25.319	25.5147	25.6191	25.4861	25.8009	25.531	25.6588	26.0081	25.3764	2	2	3	0	0	0	0	0	0	0	0	0	0	0
19.2041	19.4197	20.0289	20.2773	20.629	20.2175	19.7071	19.5399	20.0548	20.6286	19.5785	20.7154	19.7479	19.533	19.8342	19.6747	19.9471	19.6403	18.355	18.8088	19.041	19.2002	20.007	19.2287	19.7984	19.4211	18.6368	19.2785	19.6692	18.9624	19.6933	19.6044	18.9179	19.4369	19.9138	19.1648	0	0	0	0	0	0	0	0	0	1	1	0	0	0
20.0827	19.7737	20.0511	20.2016	20.4415	20.3941	19.7798	20.5866	20.6225	19.7425	20.0563	19.9672	NaN	20.0821	19.8317	22.3287	20.9907	20.7467	NaN	NaN	NaN	NaN	NaN	NaN	19.3929	NaN	NaN	NaN	NaN	NaN	NaN	NaN	NaN	NaN	NaN	NaN	0	0	0	0	0	0	0	0	0	0	0	0	0	0
18.3193	18.4064	NaN	NaN	NaN	18.2406	NaN	NaN	NaN	NaN	NaN	NaN	NaN	NaN	NaN	18.1396	18.5505	NaN	21.3981	20.9245	19.5871	18.9768	18.8559	19.707	18.9176	19.0535	20.0465	19.2422	18.8572	19.1062	19.1278	18.8918	18.6657	19.6867	20.8454	19.5919	0	0	0	0	0	0	0	0	0	0	0	0	0	0
23.0604	24.24	24.0373	24.4908	24.4354	25.1217	24.7086	25.0541	24.1882	23.9359	24.2799	23.7442	23.1241	24.4728	23.2282	22.1996	22.2194	22.9555	23.3615	20.7868	NaN	22.544	19.7086	21.2946	20.8244	20.3418	19.7163	20.1807	20.1874	20.5722	20.9131	21.2622	20.4359	20.8321	20.1279	20.0563	1	3	3	3	3	4	5	5	3	2	3	3	2	4
23.0557	21.9173	22.7533	23.5721	23.027	23.1904	23.5568	22.7777	23.8416	23.705	24.2216	22.772	24.0175	23.2426	23.5851	22.8448	22.328	23.0575	22.4143	22.8612	22.391	23.5701	24.2092	24.218	23.1327	23.2888	23.0059	23.941	23.9683	24.8275	24.798	24.315	24.8318	24.189	25.0403	24.3498	1	0	1	1	1	1	1	1	2	0	2	1	1	1
26.9393	26.6625	26.5464	26.4664	26.2952	26.6323	26.5683	26.0061	25.4649	26.278	25.951	25.1917	26.4868	25.8588	25.9911	25.5041	24.9771	25.5377	24.351	24.5774	25.1356	25.1777	24.8802	24.4003	23.4383	23.8737	23.143	24.9423	25.0522	24.7313	25.146	25.0417	25.5613	24.7599	24.6258	24.5305	9	12	10	7	7	8	7	8	2	6	3	2	10	8
24.3447	24.4631	23.1462	23.3199	24.4269	23.5572	23.992	23.012	23.7261	23.0858	23.4445	23.0184	22.9325	23.2713	23.4051	24.6923	24.7337	23.9834	21.3899	21.409	21.6809	21.5673	21.6062	21.9183	23.9837	23.1366	23.9433	21.7401	21.4557	21.2056	21.5788	21.5289	21.2423	22.8125	22.0649	22.6609	2	3	1	1	1	2	1	0	2	0	1	0	1	1
20.8971	21.4586	20.9906	21.3081	21.1284	21.7918	21.2076	20.1207	19.84	21.6168	22.6076	21.9653	21.6986	21.6981	21.9554	22.2674	21.2606	21.4876	25.1101	24.2802	22.5007	25.0563	24.4128	23.0207	24.7585	23.2093	24.8041	24.5556	24.3909	23.2767	24.3785	24.6244	24.4463	24.5758	24.1181	24.6865	0	0	1	0	0	1	0	0	0	0	1	0	0	0
21.9109	22.3977	23.7529	19.5974	19.9678	21.5158	15.4479	15.363	15.664	17.8536	18.3906	16.1288	15.4637	17.4077	16.1967	14.9458	16.9479	19.9481	26.3464	26.2171	27.9961	28.201	28.2192	27.3803	25.6898	26.3408	26.527	28.2404	28.7542	28.5425	27.7832	28.5852	29.0235	27.8408	27.9462	27.7435	2	3	3	0	0	2	0	0	0	0	0	0	0	0
NaN	NaN	NaN	NaN	NaN	NaN	NaN	NaN	NaN	NaN	NaN	NaN	NaN	NaN	NaN	NaN	NaN	NaN	19.3234	20.5016	21.4002	19.2308	19.9967	19.6361	21.9672	21.8769	21.674	NaN	18.4893	17.7556	21.6551	21.273	21.5311	19.5394	19.7389	19.9192	0	0	0	0	0	0	0	0	0	0	0	0	0	0
20.0849	20.1192	NaN	19.7352	19.6397	20.1535	20.7708	21.9661	22.0213	21.5236	22.173	21.1972	20.3815	21.2357	20.9205	NaN	NaN	NaN	NaN	NaN	NaN	NaN	NaN	NaN	NaN	NaN	NaN	NaN	NaN	NaN	NaN	NaN	NaN	NaN	NaN	NaN	0	0	0	0	0	0	1	1	1	1	2	0	0	0
23.4047	24.681	24.434	25.0121	23.9573	24.3737	25.3677	24.1935	25.8399	24.7979	25.6936	24.1389	23.9538	24.6962	25.1683	23.1066	23.3013	22.9363	23.8296	24.0507	25.5649	24.322	25.1565	24.1185	24.9642	24.7485	23.5551	24.1483	25.3171	24.3879	25.7395	24.4173	24.8292	24.5901	25.4596	24.9752	1	2	1	3	2	3	2	1	3	2	3	1	2	2
24.0808	24.9824	24.9144	25.8367	25.6653	25.8615	24.0168	23.2522	24.5017	24.8711	24.2004	24.7811	24.0573	24.681	23.7658	23.6896	24.1905	23.557	22.3705	22.8165	23.2348	23.7794	24.4824	23.7434	23.6695	23.8234	23.3653	23.6887	23.8534	24.1645	23.5074	23.4022	23.8309	23.4997	23.6854	23.4765	4	4	4	6	4	5	3	2	3	4	3	4	4	4
NaN	NaN	NaN	NaN	NaN	NaN	NaN	NaN	NaN	NaN	NaN	NaN	NaN	NaN	NaN	NaN	NaN	NaN	NaN	NaN	21.6988	NaN	22.5163	23.116	22.0061	NaN	22.246	22.4588	22.4987	22.3269	22.4113	22.4529	22.5469	22.9539	NaN	22.7073	0	0	0	0	0	0	0	0	0	0	0	0	0	0
23.115	22.9567	22.3901	22.2891	22.4484	23.1799	23.1229	23.5496	21.5004	22.6897	22.7981	21.5874	21.8567	21.6277	21.825	22.3077	21.9375	22.8371	24.0844	23.4206	23.5151	23.9303	23.3003	22.5408	22.3807	23.2164	23.1127	23.9956	24.1375	24.4112	23.8614	23.8975	24.1082	22.9967	23.6175	23.47	1	2	0	1	1	1	1	1	0	1	1	0	1	1
21.3478	20.6712	21.1494	20.1393	20.0342	20.2368	20.4858	20.1525	20.0764	20.4526	20.5518	20.256	20.0858	20.1254	20.056	21.2081	20.8964	21.2442	19.9178	20.1346	19.3943	19.7936	19.3617	20.3897	20.8454	21.3293	21.7414	19.6519	19.5758	19.7095	19.9887	19.283	19.44	21.2847	19.9075	20.0612	1	0	1	0	0	0	0	0	0	0	0	0	0	0
23.0277	23.155	22.4105	21.6757	21.5324	21.2658	22.1247	22.5068	22.1464	21.5951	21.7206	21.6323	22.3884	21.9695	22.0582	21.0303	22.2418	21.9928	22.6168	22.9909	22.7753	20.7357	20.9991	22.9169	22.0438	21.9537	22.5876	20.9202	20.6651	20.7243	20.5475	20.9551	20.8217	NaN	20.4367	NaN	2	2	0	0	0	0	0	0	0	0	1	0	1	1
18.5577	18.4819	17.9494	18.3068	18.2102	18.7187	17.5478	18.2831	18.1201	18.5332	18.706	NaN	18.3734	17.8053	18.6351	18.5367	18.7955	18.7154	19.3847	19.3833	19.3948	19.4702	20.1715	19.7075	NaN	20.383	NaN	19.5911	19.4026	21.0196	19.1059	18.8827	20.1422	19.5334	21.7756	21.6454	0	0	0	0	0	0	0	0	0	0	0	0	0	0
21.7219	21.3152	20.9571	21.0541	21.0876	21.255	21.4657	21.0625	21.0165	21.3526	21.4138	20.9095	21.2704	21.1163	21.2176	20.982	21.1366	20.8481	22.0666	21.3274	20.0031	20.9469	20.6335	20.743	21.6086	21.0232	20.9417	20.6091	20.6095	20.6465	20.9436	20.3445	20.3946	21.5538	20.7032	21.574	0	0	0	0	0	0	0	0	0	0	1	0	0	0
28.2273	28.0429	27.6488	25.8442	25.8821	25.1969	26.5695	25.4099	23.4224	24.3277	23.9404	25.3587	24.551	24.2226	23.1607	21.0903	20.9649	21.2263	24.5792	24.2897	23.7147	23.8666	23.5335	20.5699	NaN	NaN	NaN	23.6971	24.5399	24.7676	23.996	23.9906	24.4797	23.1121	22.7849	22.838	6	6	3	1	2	3	2	1	0	0	0	1	0	0
22.1677	23.5041	24.5951	25.4044	25.3086	25.4329	22.6236	23.2297	25.2033	27.7548	23.8094	25.7049	22.8127	26.8591	23.9781	24.3153	24.0517	22.8975	19.5011	20.0527	21.1248	20.0846	22.3785	20.7878	20.5677	20.1134	19.8602	21.3201	20.3423	20.3557	22.7202	20.8351	23.2617	22.747	23.4992	21.4737	0	2	4	6	7	5	1	2	6	14	3	9	1	12
17.9385	18.1454	18.3784	18.3029	18.2313	18.0539	18.0733	18.1771	NaN	NaN	NaN	NaN	17.9986	NaN	NaN	17.6481	17.9471	17.6694	NaN	20.2315	22.4847	21.9416	NaN	NaN	18.1249	18.4428	18.0435	NaN	NaN	NaN	NaN	21.2847	NaN	NaN	20.6962	18.9902	0	0	0	0	0	0	0	0	0	0	0	0	0	0
20.2109	19.2874	19.6817	19.846	19.3208	19.4135	19.1447	19.4731	19.5084	19.9598	20.1834	20.174	19.9392	19.8817	19.6233	NaN	18.7903	NaN	21.5296	22.6841	23.0912	22.7796	23.7477	21.9653	20.3312	21.115	21.68	22.1959	23.2342	23.4278	23.0518	22.7151	21.6626	21.6147	22.8922	22.0201	0	0	0	0	0	0	0	0	0	0	0	0	0	0
24.4605	23.9634	24.0365	24.0235	24.4192	24.3915	23.2456	23.6494	24.3605	24.6868	24.6742	24.3913	24.3307	24.8489	24.5163	23.4372	21.623	23.1883	26.4774	26.4285	27.1116	26.4291	26.8436	27.0074	26.6715	26.669	26.6926	26.3428	26.7643	26.8874	26.7927	26.8616	26.1352	26.5585	26.9616	26.5082	1	0	0	0	1	3	0	1	2	2	1	1	0	2
NaN	NaN	NaN	NaN	NaN	NaN	NaN	NaN	NaN	NaN	NaN	NaN	NaN	NaN	NaN	NaN	NaN	NaN	19.778	20.5902	19.2566	19.6744	20.0791	20.1153	NaN	NaN	NaN	20.4603	19.7187	22.1481	19.8622	19.5819	21.3884	19.7891	19.7473	19.7633	0	0	0	0	0	0	0	0	0	0	0	0	0	0
23.2073	22.8667	22.4563	21.5991	21.8611	21.4033	22.4472	21.5476	21.2649	21.2812	20.7692	20.8138	21.9178	21.1891	21.4811	19.5664	NaN	20.22	23.5104	22.9791	23.5008	23.7329	22.9929	23.8757	19.4508	21.0366	19.2257	23.989	23.14	22.5825	22.7994	22.913	23.3938	22.3721	22.781	22.8499	3	1	0	0	1	0	1	0	0	0	0	0	1	0
NaN	NaN	20.6676	19.5299	19.3624	19.6085	19.3617	19.6404	19.4799	NaN	19.7143	20.6356	19.4026	NaN	19.4414	20.3866	19.7957	NaN	NaN	NaN	NaN	NaN	NaN	NaN	19.6474	19.3944	19.2124	NaN	NaN	NaN	NaN	NaN	NaN	NaN	18.3513	NaN	0	0	1	0	0	1	0	1	0	0	0	1	0	0
24.3986	24.3556	25.2542	24.5381	24.699	24.6473	24.3113	24.0919	24.8878	24.5439	24.4833	24.5121	24.8319	25.1735	24.6374	23.9215	23.478	23.5773	25.2249	25.0563	25.7137	24.8455	24.9437	24.7919	25.7165	25.8643	25.5917	24.7538	24.8645	24.913	25.1368	25.2592	25.2266	24.9991	24.6186	25.1226	5	6	12	5	8	8	5	3	11	6	7	5	8	6
21.7076	22.2144	22.0192	21.8465	21.6811	21.5379	21.9317	22.2202	22.2066	22.1959	22.1751	21.7951	21.9345	21.3366	21.848	22.1853	22.4182	21.924	22.7635	23.275	21.875	22.8566	22.8008	22.9868	24.1618	24.7749	24.4959	22.5053	22.8379	22.59	22.9534	22.6777	22.2079	22.997	23.1431	23.1222	1	1	1	0	0	1	0	0	0	0	0	0	0	0
21.9701	21.8516	23.1823	23.4659	23.3569	23.1709	23.8155	23.0051	22.9891	22.4014	22.0197	22.1378	22.276	21.9586	22.0539	22.0472	20.9107	21.1225	20.9458	20.2907	21.6829	20.7503	21.4367	22.4661	18.7348	19.018	18.6764	21.5609	21.4145	21.3175	21.3195	20.6667	21.9289	19.816	21.0618	20.7187	1	1	1	3	2	2	3	1	1	1	1	1	1	1
18.5373	NaN	NaN	NaN	NaN	NaN	NaN	NaN	NaN	NaN	NaN	NaN	NaN	NaN	NaN	NaN	19.013	NaN	18.0088	18.2178	18.142	18.308	18.2466	18.5024	NaN	20.9614	21.1365	17.952	18.3155	17.7156	18.1496	18.0617	NaN	17.9141	17.6381	18.2141	0	0	0	0	0	0	0	0	0	0	0	0	0	0
24.5002	24.5179	25.0825	26.3409	25.4987	25.6643	22.4873	22.2156	24.0252	24.6737	22.9047	23.6471	24.0332	24.42	23.0655	22.8611	23.0462	21.9031	21.902	22.4413	22.6871	23.1728	23.7714	22.7285	23.7382	23.6043	22.5246	23.0754	23.3675	23.3557	23.1739	22.7587	23.4843	23.065	23.4619	23.1322	5	2	4	7	7	6	0	1	5	4	3	4	2	5
26.8197	26.7031	27.332	26.7439	26.9168	26.5692	26.7724	27.0506	27.6051	26.4182	26.6804	26.3143	26.0188	26.854	26.5537	26.295	26.3652	26.2975	27.1287	27.025	26.9992	26.4026	26.4928	26.7139	26.9336	26.9015	26.4226	26.0762	26.2773	26.1864	26.5976	26.6664	25.8004	26.1871	26.4487	26.0852	14	9	8	7	9	7	12	10	17	6	10	7	8	8
21.8816	21.8135	22.0495	21.5242	22.0907	21.8037	20.891	21.1615	21.4965	21.3767	22.0015	21.0632	21.9982	22.7717	21.089	NaN	NaN	NaN	21.8456	22.3999	22.731	21.8327	22.1703	23.2548	18.5958	19.043	20.2485	20.9717	22.344	21.1097	22.174	21.9783	21.7792	21.6438	21.5424	22.5596	1	1	1	1	2	1	1	1	1	1	0	1	1	1
19.4058	NaN	NaN	NaN	NaN	NaN	NaN	NaN	NaN	NaN	NaN	NaN	NaN	NaN	NaN	NaN	NaN	NaN	20.5069	22.431	22.809	19.1557	19.8817	NaN	21.5158	19.858	19.7388	19.5122	19.2434	19.3412	20.6984	19.853	19.4321	20.6427	20.6503	19.7386	0	0	0	0	0	0	0	0	0	0	0	0	0	0
21.155	20.7359	20.641	20.8918	21.6246	21.0471	19.979	20.472	19.7518	20.7772	21.2481	20.6139	20.4679	21.3398	20.3962	19.0272	19.0416	18.8798	23.6782	23.2396	24.0699	22.5038	23.1044	22.9712	21.2823	22.8314	22.0479	22.6063	22.7395	22.9113	22.8343	23.3757	22.5532	22.3691	22.3257	22.0544	0	0	0	0	0	0	0	0	0	0	0	0	0	0
18.8958	18.9583	20.2877	19.4972	19.5184	19.3916	19.2567	19.0598	19.4461	20.9749	19.0679	20.0556	18.6948	19.5854	19.0662	17.3064	17.0397	18.0793	29.5814	31.161	28.3757	29.6659	30.7739	30.2303	30.6743	29.145	30.6887	29.3273	29.4093	29.9258	29.8755	29.8248	29.4427	29.3029	29.2008	28.953	0	0	0	0	0	0	0	0	0	0	0	0	0	0
NaN	NaN	NaN	NaN	NaN	NaN	NaN	NaN	NaN	NaN	NaN	NaN	NaN	NaN	NaN	NaN	NaN	NaN	NaN	NaN	NaN	NaN	NaN	NaN	20.028	19.4931	20.0757	NaN	NaN	NaN	NaN	NaN	NaN	NaN	NaN	NaN	0	0	0	0	0	0	0	0	0	0	0	0	0	0
19.853	19.8667	19.4543	19.9107	19.097	19.883	19.6316	19.22	19.6955	19.8081	20.084	19.8038	19.3724	19.4863	20.2376	22.7402	22.5312	20.5912	19.2705	19.1728	18.4231	19.6329	19.6064	19.957	19.7516	19.4999	19.9269	20.2368	19.6814	19.4515	18.986	18.7139	18.8242	22.3324	21.5735	22.0477	0	0	0	0	0	0	0	0	0	0	0	0	0	0
21.1088	20.8414	21.0104	20.3366	20.2515	20.3931	20.3156	19.8813	19.8303	19.7249	20.1493	20.446	19.9257	20.7663	20.8459	21.3003	20.4182	21.7576	20.3383	20.1856	20.5203	20.0949	19.7987	20.9582	21.7522	21.7146	22.0972	19.4444	19.2783	19.6151	19.7199	19.8595	19.5997	20.2801	20.6634	20.8164	0	0	0	0	0	0	0	0	0	0	0	0	0	0
19.8949	19.8675	20.1302	20.3243	20.4832	20.3183	19.8276	19.9933	20.1116	20.1934	20.5913	20.5511	19.8161	20.6852	20.4998	20.4801	21.6133	21.2809	NaN	NaN	19.3336	19.7421	19.2668	20.3244	21.1202	21.5133	22.0077	19.9631	19.4372	19.7876	19.5251	19.716	19.0109	20.1932	20.1839	20.4619	0	0	0	0	0	0	0	0	0	0	0	0	0	0
17.9253	18.1426	17.9588	17.7574	18.3661	17.9757	17.6659	16.8677	17.8508	NaN	NaN	17.5365	17.3696	NaN	NaN	18.4285	NaN	NaN	19.4315	18.5885	18.218	18.8707	19.0115	NaN	20.5298	21.2149	20.6843	20.3475	19.8607	19.3144	19.1743	19.1953	18.7463	21.4108	20.2911	19.2382	0	0	0	0	0	0	0	0	0	0	0	0	0	0
22.5612	24.9432	22.9285	22.9916	23.4103	23.4869	25.9579	23.8768	23.693	24.3696	25.6577	23.4666	23.8845	23.6038	25.0865	24.5659	22.1134	24.5911	19.6755	19.6809	20.4169	19.0728	18.7854	NaN	18.7064	NaN	19.5336	18.9182	19.2725	18.9937	19.034	NaN	19.2413	18.439	19.0964	NaN	1	3	2	1	2	2	4	2	2	4	4	1	2	2
19.3853	20.313	22.4463	22.4412	20.795	20.641	19.7951	21.0889	22.6026	19.3393	19.4933	20.5441	19.975	20.4822	22.1146	22.186	22.5495	22.8522	NaN	NaN	NaN	NaN	NaN	NaN	NaN	NaN	NaN	NaN	NaN	NaN	NaN	NaN	NaN	NaN	NaN	NaN	0	0	1	1	1	1	0	0	1	0	0	1	0	0
25.5498	25.8428	26.1059	25.5925	25.8357	25.666	26.1029	26.1181	26.2694	26.1281	26.14	26.7543	26.033	25.9988	25.9672	26.1646	25.9532	26.1672	24.2164	23.9374	23.7515	24.0015	23.9844	24.6558	24.8924	25.0335	25.5366	23.8476	23.3288	23.8322	23.3101	23.6816	23.1813	23.843	23.8809	24.0675	8	9	7	7	8	7	10	9	11	8	6	12	9	6
NaN	NaN	NaN	NaN	NaN	NaN	NaN	NaN	NaN	NaN	NaN	NaN	NaN	NaN	NaN	NaN	NaN	NaN	19.4243	18.9744	18.8824	19.9174	19.5247	NaN	19.7707	21.6043	21.2867	19.1354	19.393	19.289	19.7992	19.9139	19.209	21.8744	21.6525	21.9981	0	0	0	0	0	0	0	0	0	0	0	0	0	0
19.6493	19.6232	19.6457	19.0216	NaN	19.6266	NaN	NaN	NaN	19.3302	19.0797	19.2979	19.3129	19.2363	18.8914	20.3981	21.4381	20.6002	NaN	NaN	NaN	NaN	NaN	NaN	NaN	NaN	NaN	NaN	NaN	NaN	NaN	NaN	NaN	NaN	NaN	NaN	0	0	0	0	0	0	0	0	0	0	0	0	0	0
19.9448	20.5739	21.2051	22.0462	21.8755	20.7368	19.3505	18.8146	18.738	21.6676	21.5981	21.1172	22.1832	21.8275	21.3648	20.4383	20.6398	20.7995	NaN	NaN	NaN	NaN	NaN	NaN	NaN	NaN	NaN	NaN	NaN	NaN	NaN	NaN	NaN	NaN	NaN	NaN	0	0	0	2	2	0	0	0	0	0	0	0	1	0
NaN	NaN	NaN	NaN	NaN	NaN	NaN	NaN	NaN	NaN	NaN	NaN	NaN	NaN	NaN	NaN	NaN	NaN	18.7384	18.8739	20.1546	NaN	NaN	NaN	NaN	NaN	NaN	17.8988	18.2251	18.0351	18.5884	18.5253	18.5133	18.2717	18.3559	18.2616	0	0	0	0	0	0	0	0	0	0	0	0	0	0
19.1399	NaN	18.9472	19.4238	NaN	19.1931	19.1791	19.9827	19.2146	19.0508	18.9545	19.4576	19.1328	19.1313	19.1263	20.3839	20.045	22.5739	NaN	NaN	NaN	NaN	NaN	NaN	18.88	19.1538	19.1706	NaN	NaN	NaN	NaN	NaN	17.9108	18.4746	NaN	NaN	0	0	0	0	0	0	0	0	0	0	0	0	0	0
NaN	NaN	NaN	18.9585	19.2343	19.0203	19.0107	NaN	18.9982	19.0321	NaN	NaN	19.2302	19.1137	19.4983	NaN	NaN	NaN	NaN	NaN	NaN	NaN	NaN	NaN	NaN	18.863	18.6196	NaN	NaN	NaN	NaN	NaN	NaN	NaN	NaN	NaN	0	1	0	0	0	0	1	0	0	0	0	0	0	0
20.9264	20.6321	20.642	20.3563	20.7018	20.0319	20.1187	20.3064	20.5113	21.0749	20.5605	20.2681	20.5183	20.4267	20.928	20.8254	20.7651	21.6185	21.0908	21.246	21.0856	22.2955	21.1745	20.9838	NaN	19.5386	20.3763	22.407	22.5475	21.19	20.7193	21.3841	21.4494	21.2627	21.0142	21.6839	0	1	0	0	0	0	0	0	0	0	0	0	0	0
22.7305	22.268	23.4882	24.0289	23.7997	23.47	22.5944	21.4139	23.0002	24.5236	22.1187	22.0083	22.4264	23.7218	21.7158	20.9558	21.3435	20.1759	19.7627	19.8797	19.8842	20.3281	21.3854	20.743	20.9329	20.3989	19.1095	20.4244	21.6834	21.7716	20.7869	20.2788	21.9617	20.8334	21.8357	21.6486	1	1	1	5	4	3	1	0	2	4	2	0	1	1
22.6962	22.6865	22.2885	23.2231	23.0193	23.2547	23.5841	23.9886	23.4687	23.3037	23.0795	23.618	23.3431	23.2296	24.1753	24.0874	23.7044	24.262	22.7353	22.6635	21.9374	23.0825	22.7427	23.8939	24.0135	24.1826	24.4149	23.0335	22.7763	22.6873	22.6437	22.7535	22.5425	22.7644	23.1886	23.452	1	0	1	0	0	0	3	4	2	1	1	0	2	2
22.8528	22.9853	22.1087	21.7928	21.5631	21.0684	20.8176	21.6197	22.7627	21.0111	21.3154	21.8474	20.2062	19.0884	21.3295	NaN	21.719	NaN	NaN	NaN	NaN	NaN	NaN	NaN	NaN	NaN	NaN	NaN	NaN	NaN	NaN	NaN	NaN	18.6621	NaN	NaN	1	1	1	1	0	0	1	1	3	1	0	1	0	0
22.5043	22.6204	22.3764	23.2434	22.7364	22.8299	22.1617	22.2667	22.1697	22.5592	22.944	22.5305	22.3402	22.3037	22.6042	22.9084	22.6522	23.2394	22.3033	22.4782	22.3688	21.8581	22.1386	22.332	23.0835	23.2199	23.1072	21.925	22.5227	21.5672	22.2698	22.2414	21.5492	23.6288	22.6507	22.3779	3	5	2	0	3	1	1	1	0	1	1	1	0	2
21.0267	20.9058	21.0311	19.9094	20.0208	19.8131	21.0463	20.5568	21.4256	20.5238	21.5172	19.8529	22.3399	21.2387	21.4708	21.0742	20.5569	20.732	NaN	NaN	20.4471	18.5654	18.9463	NaN	19.4748	18.8493	18.9526	NaN	NaN	19.2558	20.8032	19.4615	20.2409	NaN	18.9075	19.1766	0	0	1	0	0	0	1	0	1	0	1	0	2	1
NaN	16.0828	NaN	NaN	NaN	18.1571	17.994	16.759	18.1214	NaN	NaN	NaN	NaN	NaN	NaN	NaN	NaN	NaN	20.4292	19.6775	18.9423	19.5827	19.7524	19.2784	20.2746	20.4194	20.7236	20.2788	20.8378	18.7616	NaN	19.9526	20.6276	19.7481	NaN	NaN	0	0	0	0	0	0	0	0	0	0	0	0	0	0
21.7849	21.3248	21.3924	20.4513	20.1852	20.5979	23.0715	23.5174	23.5939	20.6421	20.9572	21.2641	20.022	20.2214	20.0254	22.1367	23.4546	22.445	20.5481	21.1736	22.4405	20.3546	21.7426	23.4038	24.5895	24.5782	24.2178	20.5875	21.6003	22.0325	23.2348	23.0024	22.7926	21.4295	22.6788	22.5836	1	0	0	0	0	0	2	3	3	0	0	0	0	0
19.523	20.0819	19.7796	19.3773	19.5326	19.3152	19.3338	19.6321	19.6107	19.3724	19.5634	19.5802	19.3054	19.3677	18.7737	NaN	NaN	NaN	NaN	NaN	NaN	NaN	NaN	NaN	NaN	NaN	NaN	NaN	NaN	NaN	NaN	NaN	NaN	NaN	NaN	NaN	0	1	0	0	0	0	0	0	0	0	0	0	0	0
22.119	21.8229	21.6486	21.8196	21.7609	21.5525	22.5036	21.3712	22.3672	21.27	22.5695	22.8143	22.0802	21.1847	21.8524	20.491	20.1373	20.7349	24.4967	24.8519	23.5947	23.9657	23.0277	22.1156	21.9497	22.1601	21.9543	23.5743	22.8972	22.9561	22.7717	22.5401	22.8935	24.9136	22.3728	22.7262	0	0	0	0	0	0	0	0	0	0	0	0	0	0
21.0157	22.2256	20.7537	20.7212	20.6443	20.99	20.2414	22.3738	20.124	20.916	22.5265	20.2362	20.6125	20.7687	20.0938	23.4206	21.8232	22.2702	21.3831	20.8373	21.76	21.6465	21.5045	19.4019	21.4596	22.1482	22.0798	21.3492	21.1788	21.333	20.3297	21.3759	20.5594	21.7654	21.9012	22.513	0	1	0	0	0	0	0	1	0	0	1	0	0	0
25.0345	25.1069	24.9364	24.6523	24.6381	24.568	22.9808	22.828	22.5085	23.6503	23.3624	23.1698	22.7525	22.5546	22.8653	23.8748	24.8678	24.6791	29.2991	30.1906	28.7499	30.1675	29.5457	29.2429	29.4262	29.0298	29.2584	30.2791	30.3527	29.1066	31.373	31.4035	28.563	29.5499	29.7008	29.8586	2	2	1	2	1	1	0	0	0	1	1	0	0	0
NaN	NaN	NaN	NaN	NaN	NaN	NaN	NaN	NaN	NaN	NaN	NaN	NaN	NaN	NaN	NaN	NaN	NaN	NaN	NaN	NaN	NaN	NaN	NaN	20.81	20.4129	21.416	NaN	NaN	NaN	NaN	NaN	NaN	NaN	NaN	20.1762	0	1	0	0	0	0	0	0	0	0	0	0	0	0
NaN	NaN	NaN	NaN	NaN	NaN	NaN	20.7822	NaN	NaN	NaN	NaN	NaN	NaN	NaN	22.3872	21.422	21.2758	NaN	NaN	NaN	NaN	NaN	NaN	NaN	NaN	NaN	NaN	NaN	NaN	NaN	NaN	NaN	NaN	NaN	NaN	0	0	0	0	0	0	0	0	0	0	0	0	0	0
25.7628	25.6006	25.7263	25.5234	25.3065	25.5102	25.39	25.0048	25.3446	25.3579	25.0417	25.3258	24.9644	25.3694	25.5361	25.5082	25.6611	26.3357	26.1556	26.6547	26.6706	26.2986	26.1853	26.378	27.7589	27.575	27.7216	25.8681	25.7968	25.4947	25.5084	25.8487	25.8877	26.6425	27.0854	26.9613	7	8	6	4	4	4	3	2	3	3	3	4	6	1
NaN	NaN	NaN	NaN	NaN	NaN	NaN	NaN	NaN	NaN	NaN	NaN	NaN	NaN	NaN	NaN	NaN	NaN	20.1567	20.1504	20.3972	20.4918	20.4211	20.2281	20.6978	20.2791	20.2196	20.0666	19.4703	20.1461	NaN	NaN	19.6768	20.3857	20.2644	20.7304	0	0	0	0	0	0	0	0	0	0	0	0	0	0
25.928	26.1456	26.2495	25.8377	25.5488	25.649	25.438	25.4268	25.6041	25.9444	25.622	26.1311	25.787	25.4513	25.8517	25.9401	26.1507	25.8803	25.9467	26.4704	26.3856	26.5479	26.5989	26.8321	27.6711	27.6068	28.2719	26.2979	26.535	26.3553	26.5269	26.4758	26.396	26.6214	27.0421	27.1248	5	5	4	4	3	6	4	3	4	3	4	3	5	5
20.9063	21.1695	21.2267	21.3016	20.6847	20.6321	21.2469	21.5785	20.9692	21.1758	20.4542	20.5059	21.0849	20.6803	20.9998	22.1805	22.4221	21.704	20.4457	20.2441	20.5365	20.9166	20.0864	20.9024	19.9326	20.3533	21.016	20.7897	20.0421	19.9557	19.2799	19.6222	19.8287	20.4453	20.0061	20.4718	0	2	0	0	0	0	0	0	0	0	0	0	1	0
21.3499	21.7142	21.8558	21.8498	21.6332	21.7967	21.6454	21.7753	21.5492	21.194	21.2065	21.5813	21.5452	21.5908	21.8085	22.2264	21.7911	21.0769	22.6632	23.0607	21.598	23.3566	23.1729	21.3088	23.5512	23.455	23.9858	21.5752	22.6799	21.6193	21.704	21.986	22.0959	23.0841	22.1124	22.3522	1	0	1	0	1	0	0	0	0	0	0	1	0	0
29.9375	29.869	29.7929	29.9867	30.2528	30.2538	30.0923	30.7664	30.8049	29.9184	30.2629	29.9912	30.0372	30.6044	29.6331	28.9232	28.5975	28.9257	31.2445	31.1759	31.7134	31.2434	31.7903	32.0222	30.4864	30.4764	30.1995	31.3556	31.6243	31.9559	32.0368	32.0833	31.5885	31.2571	31.6921	31.5078	44	32	28	35	42	45	39	50	40	41	46	30	39	42
25.3621	20.0717	18.5903	17.4872	17.9875	17.742	17.9583	17.7851	19.1259	18.3603	19.9308	17.7019	18.0444	17.9715	19.32	16.2055	16.3335	18.9063	29.6501	29.0205	29.4994	28.9928	29.177	29.208	28.5158	28.929	28.488	28.5184	29.0526	28.1478	29.7074	29.6583	28.0047	28.8569	29.4068	28.6839	4	0	0	0	0	0	0	0	0	0	0	0	0	0
19.1745	19.1618	19.5665	18.8856	18.9488	19.2649	19.3743	19.1055	19.2372	19.4404	19.2506	19.2496	19.2477	19.044	18.9391	19.2602	NaN	NaN	NaN	NaN	NaN	NaN	NaN	NaN	NaN	NaN	NaN	NaN	NaN	NaN	NaN	NaN	NaN	NaN	18.6611	18.5681	0	0	0	0	0	0	0	0	0	1	0	0	0	0
24.1757	23.9671	23.472	23.5644	25.2427	24.117	24.0098	23.7984	23.799	23.9766	24.601	23.9731	24.0619	24.1498	NaN	25.6682	25.4513	25.3053	NaN	NaN	NaN	NaN	NaN	NaN	20.692	NaN	NaN	NaN	NaN	NaN	NaN	NaN	NaN	NaN	NaN	NaN	1	0	0	0	1	0	0	0	0	0	1	0	0	0
25.6515	25.1181	25.7898	25.5142	25.625	25.6346	25.3564	25.5272	25.4822	24.8312	25.6031	25.4376	25.2729	25.0772	25.0315	24.8703	24.8834	24.5774	23.9121	23.8366	24.8346	25.0201	25.2046	24.0266	23.2812	24.4839	23.7839	24.9759	24.556	25.1262	23.7108	24.554	24.3202	23.8911	24.6025	24.4684	2	2	2	2	2	2	1	2	1	0	1	2	1	1
19.0307	19.2333	19.4011	19.0967	19.1336	18.847	19.1669	19.4833	19.3057	18.8446	19.1538	19.5707	18.6892	19.0422	19.1097	19.9861	22.0729	22.4269	NaN	NaN	NaN	NaN	NaN	NaN	NaN	NaN	NaN	NaN	NaN	NaN	NaN	NaN	NaN	18.0634	NaN	NaN	0	0	0	0	0	0	0	0	0	0	0	0	1	0
25.4786	25.0902	25.1332	25.1157	25.2548	25.139	25.1673	24.9923	25.4653	25.4909	25.7281	25.3635	25.3832	25.0627	25.5155	24.9794	24.9424	24.9276	24.9226	24.3514	25.6627	24.2452	24.7431	24.6176	24.2813	24.1403	23.2143	24.5958	24.4419	25.4418	24.875	24.934	24.9298	24.1143	24.2181	24.0596	5	6	3	4	6	4	4	3	8	3	5	3	8	5
30.8656	30.7077	31.0123	30.9566	30.8227	30.886	30.7493	30.6736	30.5958	30.6648	30.6239	30.806	30.6575	30.4581	30.608	30.8835	31.1053	30.9994	29.8449	30.2164	30.3485	30.3886	30.0724	30.0046	31.4199	31.2718	31.3103	30.0095	29.9948	29.8822	30.0548	30.2404	29.9993	30.2961	30.7392	30.5575	22	19	20	21	22	22	21	17	19	22	16	17	20	18
21.5624	21.8234	21.7029	20.9072	20.6941	21.2026	21.9478	22.0326	21.404	21.0672	21.0097	NaN	21.3079	20.9927	21.3509	NaN	20.9219	NaN	22.4457	22.3902	22.5239	23.0402	22.458	22.462	21.5131	21.955	21.584	23.2699	23.0519	23.4423	23.7376	23.5225	23.418	23.3596	22.0475	22.3837	0	0	0	0	0	0	1	1	0	0	0	0	0	0
21.6073	21.2724	22.3014	21.5839	20.8365	21.1214	20.6266	20.7664	21.5042	20.9664	20.6355	21.923	21.3445	20.3255	20.5014	21.7578	22.0894	21.8267	20.626	20.728	19.6701	20.5988	19.9229	20.5786	20.6014	21.1353	19.0018	20.7737	20.526	20.6167	20.5073	19.9955	20.3347	20.1427	20.6157	20.6251	1	1	1	2	0	1	0	1	1	0	2	0	0	0
24.016	24.0255	23.4245	22.8326	23.0126	23.3467	23.112	23.1006	23.9914	22.2638	22.8883	22.499	23.5201	24.0103	23.6775	24.532	24.186	24.7142	22.1585	22.1676	22.1424	22.0062	22.1382	23.8145	24.3662	24.2221	24.2336	21.6139	21.9679	21.9143	22.7077	21.9788	21.9032	22.1494	22.8069	23.5285	2	2	2	1	1	3	3	1	2	1	0	0	2	2
23.2478	23.2794	23.4358	23.0305	23.0904	23.2777	23.0999	23.37	23.1552	23.3746	23.4153	22.7902	23.0497	23.1271	23.6808	23.865	24.0963	23.9286	24.9413	25.5566	24.7554	24.708	24.4997	24.4966	26.1411	26.2033	27.0227	24.3769	24.0931	24.4601	24.389	24.4156	24.0871	25.2586	24.9139	25.0219	2	2	3	1	2	2	2	3	2	3	2	0	1	1
24.2598	24.2226	24.7604	24.2404	24.16	24.0605	23.9169	23.8829	24.2567	24.4836	23.7006	24.3075	23.7052	24.196	24.5943	24.8445	25.2822	25.1491	22.7608	23.0749	23.2304	23.4945	23.3272	24.597	24.9476	24.9788	25.18	23.0803	22.4342	23.4427	23.3823	23.0278	23.0859	23.6108	23.5565	23.8608	1	2	2	2	2	1	2	1	1	1	0	2	0	2
19.3611	19.344	19.049	NaN	19.0606	19.662	18.9239	18.6215	18.8782	19.2355	18.9097	18.8422	19.0136	18.6101	18.8849	19.0786	NaN	18.9097	20.0068	19.4146	18.8292	20.024	19.4302	18.5648	18.5988	18.6043	19.0254	19.466	20.2617	20.1224	19.445	19.8211	19.2362	19.1779	18.7718	18.9125	1	0	0	0	0	0	0	0	0	0	0	0	0	0
26.248	26.5712	26.5167	25.4193	26.0352	26.1953	26.3901	25.7516	25.2118	25.3337	25.6135	25.2074	24.8265	26.1701	24.7591	26.6807	25.6157	24.3788	21.6879	22.0248	22.141	22.1781	21.3526	NaN	24.6086	24.7348	23.4963	22.0465	21.5472	20.984	22.0185	22.3487	22.1115	NaN	21.6001	21.5752	4	2	2	1	2	3	3	3	1	2	2	2	1	2
25.3634	25.5727	24.9429	25.5453	25.6451	25.3495	23.8534	23.355	24.6327	25.4967	25.2149	25.162	25.2276	25.7058	24.9397	25.931	25.9453	25.473	24.3295	24.5135	21.4172	23.8019	24.5765	19.2835	26.0037	26.0259	26.033	24.8078	24.0475	24.5779	23.7352	23.6685	23.2322	24.6175	25.2678	24.5124	1	1	1	1	1	1	0	0	1	1	1	1	1	1
20.6391	19.6151	NaN	NaN	NaN	NaN	NaN	NaN	NaN	NaN	NaN	NaN	NaN	NaN	NaN	18.6778	19.819	NaN	19.1367	19.4749	19.1832	18.6735	19.5025	19.0767	20.803	21.0449	21.1518	NaN	19.0785	19.1934	19.0582	18.8424	19.0583	19.9329	19.2109	20.0437	1	0	0	0	0	0	0	0	0	0	0	0	0	0
19.8022	20.0808	18.9603	18.9524	18.9568	18.8432	18.984	19.3586	NaN	19.4567	20.0927	19.0547	19.5826	19.8738	19.4033	19.478	20.2948	20.3807	19.885	NaN	20.5225	NaN	19.68	21.7371	20.5724	20.5325	20.5902	20.3313	19.5304	20.8625	19.5482	19.8547	NaN	NaN	NaN	20.2229	0	2	0	1	1	1	0	0	0	0	1	0	1	0
20.3296	20.4491	21.7319	20.25	21.6777	20.5492	20.9175	19.9648	20.3651	19.9894	20.2103	20.687	20.0355	20.5861	20.9212	23.0493	22.8242	22.9172	18.033	NaN	NaN	18.7818	19.0143	19.7731	19.6684	19.6889	20.1908	18.8563	18.9693	18.8292	18.6298	18.6514	18.4166	19.1565	19.2501	18.9322	0	0	1	0	1	0	0	0	0	0	0	0	0	0
24.7772	24.6679	24.7187	24.6912	24.5386	24.8737	24.5102	24.9544	24.4184	24.619	24.2236	24.5846	24.6007	24.4899	24.7974	24.4914	25.191	24.6158	26.3528	26.5809	25.8413	26.0754	26.2213	26.3144	27.1551	27.2228	27.5507	25.7461	25.7441	25.7054	25.8458	25.8779	25.453	26.3943	26.3478	26.559	6	3	1	2	3	2	2	2	1	0	1	1	1	1
19.8665	19.6442	19.7565	20.0527	20.2099	20.0319	20.5159	20.2835	20.5485	20.1715	NaN	NaN	19.963	19.9495	19.8418	21.752	22.7982	21.9232	19.7192	19.8517	19.8767	19.813	19.5365	19.6946	23.4256	22.8395	22.9737	19.6634	20.0006	19.0737	19.5371	19.5691	20.3975	20.2634	20.6715	20.115	0	0	0	0	0	0	0	0	0	0	0	0	0	0
19.7223	19.2903	19.7804	19.3665	19.2703	19.7707	19.2061	19.3078	19.0109	20.2274	19.5649	19.4152	19.643	19.5226	19.8953	19.6596	19.5232	19.7812	18.7083	18.7401	18.4185	18.9383	18.6845	18.9595	NaN	17.3552	19.1969	18.5015	18.6139	18.0241	18.2915	18.2129	18.4509	19.4089	18.8493	18.8923	2	1	1	0	0	0	0	0	0	1	0	0	0	0
25.3342	25.3731	24.993	25.143	25.4432	25.4865	25.4754	25.4698	24.9604	25.2505	25.191	25.1271	24.7259	24.8942	25.3108	25.9025	25.6741	25.8732	23.5661	24.4596	24.0679	24.8658	24.8413	23.9057	25.2501	25.2377	25.21	24.8634	25.0846	24.766	24.9249	24.4164	24.6417	25.3588	24.8121	24.8893	5	3	1	1	3	3	4	3	2	1	0	2	3	3
23.5256	23.5671	22.9193	22.5869	22.9774	22.7699	23.5189	22.7147	22.8359	23.7102	23.1435	23.1336	22.465	23.9223	22.5714	23.328	21.7418	22.2025	25.7718	25.3742	25.8352	24.9135	24.9866	24.1589	23.9488	24.0826	23.9605	25.2199	25.1442	24.8687	25.0508	24.9223	25.2069	24.6738	24.3737	24.4269	2	1	0	0	1	0	1	0	0	1	1	1	0	1
23.1907	23.0885	22.545	22.8418	23.3704	23.4139	22.4738	22.387	22.9627	22.7778	22.7242	22.8159	23.3853	22.8846	23.2412	24.0593	24.3416	24.2318	23.0926	23.8114	22.8508	23.6376	23.0546	21.5414	23.9856	23.5388	24.0728	22.8346	22.7109	22.4186	22.4442	22.885	22.525	23.2196	23.4554	24.2029	2	1	1	0	1	3	1	0	0	0	0	0	1	0
NaN	17.9812	NaN	17.6982	18.4983	18.1162	18.38	17.7883	18.0658	NaN	NaN	NaN	NaN	18.3396	18.0233	NaN	NaN	NaN	20.9479	21.7252	21.3229	21.9886	21.3613	19.6182	22.5772	22.5358	22.5901	21.6934	21.6786	20.9043	21.0116	20.755	21.0113	21.5891	22.0041	22.3714	0	0	0	0	0	0	0	0	0	0	0	0	0	0
NaN	NaN	NaN	NaN	NaN	19.1691	NaN	NaN	NaN	18.8002	19.085	NaN	NaN	18.8312	NaN	19.5294	NaN	19.3851	19.4776	NaN	NaN	19.3584	NaN	19.331	NaN	20.6101	20.7741	20.4257	19.7458	19.3889	NaN	19.2622	19.3543	19.8553	19.2605	19.6444	0	0	0	0	0	0	0	0	0	0	0	0	0	0
19.3806	20.2288	19.3962	20.3828	19.8618	20.1948	19.3319	19.0969	20.4797	20.4143	19.9593	19.7177	19.7587	20.8988	20.2282	19.7777	19.1525	20.4788	21.1992	21.8087	19.9357	21.3439	21.233	21.2572	21.8695	21.2029	21.3791	20.6431	20.2653	20.0265	20.4532	20.1952	20.2075	21.4783	21.3354	21.7056	0	1	0	1	0	1	0	0	1	1	0	0	1	1
19.8004	20.0033	20.7281	19.3831	19.4691	20.7108	NaN	NaN	16.8148	17.987	17.5859	18.5791	18.2683	17.4763	NaN	NaN	NaN	NaN	18.7214	19.5027	21.0111	20.2226	20.8691	19.9067	20.6356	21.2529	20.2599	18.9501	20.112	20.6727	20.0763	19.8365	20.7821	20.3968	20.8002	20.0497	0	0	0	0	0	1	0	0	0	0	0	0	0	0
NaN	NaN	NaN	NaN	NaN	NaN	NaN	NaN	NaN	NaN	NaN	NaN	NaN	NaN	NaN	NaN	NaN	NaN	20.226	20.0757	NaN	19.8158	19.8461	20.1593	18.3056	18.8558	18.4528	18.8107	19.2659	19.6451	19.5522	19.8667	19.4002	19.3984	19.762	19.6425	0	0	0	0	0	0	0	0	0	0	0	0	0	0
18.2658	18.6265	18.5634	18.8203	18.8252	18.8404	18.4896	17.7523	18.3847	18.9998	19.6136	19.219	19.8159	20.6072	19.7708	18.7197	18.6307	18.1393	21.2835	20.0128	21.6083	19.9285	21.3621	19.2259	21.1098	19.6238	19.1922	21.557	20.2837	21.6039	20.8558	20.8451	20.9872	19.8045	20.7324	19.6166	0	0	0	0	0	0	0	0	0	0	0	0	0	0
23.4756	23.5219	23.5376	23.5434	23.5207	23.5231	23.3773	23.6807	23.8305	23.9782	23.6973	23.9758	23.9657	24.2327	24.03	23.9648	24.0164	23.7927	24.29	24.5706	24.1319	24.1463	24.2182	24.551	25.6092	25.7301	26.7115	23.2628	23.6727	24.4246	24.3935	23.9059	24.3196	24.1663	24.5644	24.356	2	2	1	2	1	2	2	2	2	3	1	3	2	2
NaN	NaN	NaN	NaN	NaN	NaN	NaN	NaN	NaN	NaN	NaN	NaN	NaN	NaN	NaN	NaN	NaN	NaN	20.14	20.2655	19.9463	20.1137	20.1284	20.4904	NaN	NaN	NaN	20.0845	19.9041	19.8568	19.9029	19.8717	19.878	20.4185	20.2924	20.7547	0	0	0	0	0	0	0	0	0	0	0	0	0	0
22.8019	22.8701	22.4172	20.5099	21.5224	21.2544	21.4985	21.5087	20.8146	20.2873	21.7352	20.4894	20.2805	19.7555	19.086	NaN	19.5334	19.4793	NaN	20.4145	20.0394	NaN	NaN	NaN	NaN	NaN	NaN	20.0007	NaN	19.262	NaN	NaN	NaN	NaN	NaN	NaN	2	2	1	1	1	0	1	1	0	0	1	0	0	0
25.9374	25.8174	26.1786	25.582	26.1188	25.8096	25.5345	26.4715	26.4905	25.7334	26.556	25.964	25.8443	26.4142	25.5944	25.0816	24.701	25.0286	27.5055	27.458	27.6562	27.457	27.6607	27.6923	30.1443	30.1096	29.8824	27.541	27.5538	27.691	27.8642	27.9176	27.3474	27.6198	27.3235	27.2671	7	8	4	6	8	7	2	10	10	1	10	2	6	11
21.1141	21.4188	20.0098	20.4594	20.2704	20.1184	19.8172	19.2549	19.3296	20.8402	20.8656	21.1484	19.3624	20.0147	20.4806	19.8958	20.0163	20.2911	19.0719	19.9108	18.6288	19.1556	19.1596	19.6185	21.7457	21.6125	21.3609	19.3712	19.2795	19.1943	19.3073	19.1952	19.3558	19.9618	20.6217	20.7695	1	1	0	0	0	0	0	0	0	1	1	1	0	0
20.5243	20.6726	20.8024	20.3808	21.2628	20.1375	20.2122	20.263	20.2666	21.1017	21.0117	20.926	20.6325	20.5079	20.458	20.5444	20.1444	20.1959	24.3748	22.3127	23.6228	22.27	22.3371	22.0694	23.8271	22.7945	22.903	23.478	23.1729	23.309	22.1595	22.0975	22.9498	22.8171	21.5449	22.7304	0	0	0	0	0	0	0	0	0	1	1	1	0	0
24.4297	24.7174	24.5458	24.0607	24.0425	24.3707	24.1448	24.4084	24.7545	24.1234	24.0002	24.1929	23.9327	24.3625	24.4167	24.9116	24.6005	24.8741	23.5807	23.3063	23.8347	24.4059	23.4499	24.2067	24.9911	25.0844	24.9152	23.9229	23.7236	23.8806	23.3457	23.3138	22.8355	24.0494	23.5857	23.2051	5	6	3	2	3	3	3	7	3	1	4	4	4	2
17.5609	19.8067	NaN	NaN	NaN	19.4039	17.6851	17.544	NaN	18.252	17.9912	NaN	18.0317	NaN	NaN	17.935	17.9698	17.6658	19.7569	19.7586	19.1994	19.2061	19.6581	20.2469	19.6341	19.8037	19.5861	20.0134	19.9689	20.6356	19.7688	19.3771	21.3967	20.0021	20.3539	19.1388	0	0	0	0	0	0	0	0	0	0	0	0	0	0
26.4167	26.8731	26.7681	26.2237	26.3404	26.3438	26.498	26.4165	26.1275	26.2408	26.1764	26.0194	26.571	26.0233	25.8801	25.3677	24.9274	25.1249	26.2665	25.8918	27.0353	26.7264	26.7248	28.052	24.4552	24.5472	24.5246	27.0312	26.9146	26.6878	26.5163	26.443	26.7468	26.2036	25.9689	25.7205	7	10	6	6	4	7	5	6	4	7	6	3	5	4
22.0225	22.1195	22.498	21.7349	22.9615	22.5321	22.1448	21.5444	22.0407	22.7035	22.5494	22.2782	23.3819	23.2703	22.028	21.837	22.8949	21.7786	24.0983	23.4827	23.41	23.7458	23.8324	23.0691	23.115	23.2653	23.5707	23.531	23.6296	23.4686	22.7587	23.2636	22.407	23.8486	23.2874	24.1834	0	0	0	0	1	1	0	0	0	1	0	0	1	3
NaN	NaN	NaN	NaN	NaN	18.549	NaN	NaN	NaN	19.9701	NaN	18.8211	NaN	19.1391	18.9362	18.609	NaN	NaN	24.4767	24.3893	23.3597	24.0654	23.9226	22.9355	23.3885	23.301	23.0823	23.5921	22.9258	23.002	21.6476	22.5127	23.2804	23.1051	22.7374	22.2168	0	0	0	0	0	0	0	0	0	0	0	0	0	0
30.0469	30.3401	30.1099	30.4448	30.3043	30.3276	30.299	29.9885	30.995	30.6298	30.628	30.4288	30.4859	30.7603	30.8262	30.6673	30.8523	31.0105	27.9298	28.3043	27.8448	27.7877	28.1069	28.2142	29.2636	28.9974	29.078	27.8621	27.8458	27.9773	27.9643	28.0899	28.108	28.4032	28.5517	28.6685	28	36	30	38	36	35	37	27	42	41	40	40	36	34
24.4887	24.8302	24.7176	24.6827	24.7586	24.7794	25.2536	25.1867	24.6309	24.9454	24.6426	24.5744	24.766	24.674	24.5302	24.6777	25.1804	25.1839	25.3605	25.6382	25.4959	25.5835	25.5042	25.4853	26.8567	26.5686	26.876	25.0354	25.0854	24.9956	25.4483	25.4165	25.0524	25.742	25.967	25.8708	1	2	2	1	1	3	4	3	2	2	4	2	2	2
21.3017	21.2288	21.4563	21.654	21.5155	21.2243	22.1885	22.1678	22.3455	22.5286	22.001	21.7964	21.5611	21.8887	21.0617	23.6523	23.2258	23.2087	20.3918	19.937	23.1104	21.9361	21.9455	21.0655	20.5767	21.1782	19.9934	22.492	22.7152	23.8628	23.8803	23.46	23.3851	23.1104	23.027	23.4936	1	1	0	0	0	0	0	0	0	1	0	0	0	0
19.1386	NaN	19.2337	19.3002	19.2747	20.2248	NaN	NaN	18.5275	19.3583	20.9738	NaN	20.4499	19.3217	NaN	18.8012	NaN	19.3066	25.4592	24.1112	21.9381	22.446	22.1917	21.7811	23.0292	23.0392	23.9653	22.0734	22.0406	21.4367	21.1423	21.7643	21.5887	23.1505	21.8708	21.7365	0	0	0	0	0	0	0	0	0	0	0	0	0	0
20.3949	21.4609	19.8617	21.8668	21.2925	20.6605	20.6104	20.8312	20.3681	21.0044	20.6085	21.3026	20.739	20.6189	20.9138	19.7193	19.8866	20.5912	23.5594	23.0514	23.0001	23.3786	23.3261	23.873	22.1679	21.7486	21.8582	24.0196	23.68	23.7221	23.3604	22.8148	23.4306	23.0934	22.5625	22.3902	0	1	0	1	1	0	0	0	0	0	0	0	0	0
24.8318	24.839	24.3226	23.1931	23.5572	24.0103	23.9954	23.3728	23.0747	23.6961	23.3449	22.8415	23.5169	22.9486	22.5277	22.8215	21.1965	21.3199	22.5553	22.0506	22.6014	21.7063	21.5757	23.4485	20.495	20.2398	20.4391	22.0671	21.358	22.036	20.0277	19.9893	21.5962	21.2272	19.8015	19.779	3	3	2	1	2	2	2	1	1	2	1	2	2	1
21.478	21.5137	21.4264	21.5548	22.0179	21.6393	20.8241	19.6284	19.0292	21.4885	21.1172	21.6861	21.1825	21.7007	21.3698	21.3618	21.4644	21.3095	24.6316	24.9037	24.0132	24.7356	24.7018	24.0044	25.2728	25.176	25.3706	24.5317	24.4988	24.0326	24.3714	24.4533	24.0127	25.3343	25.1106	25.0656	0	0	0	0	0	0	0	0	0	0	0	0	0	0
NaN	NaN	NaN	NaN	NaN	NaN	NaN	NaN	NaN	NaN	NaN	NaN	NaN	NaN	NaN	21.2182	21.2026	20.9651	NaN	NaN	NaN	NaN	NaN	NaN	NaN	NaN	NaN	NaN	NaN	19.5567	NaN	NaN	NaN	NaN	NaN	NaN	0	0	0	0	0	0	0	0	0	0	0	0	0	0
20.4937	20.2423	20.9598	21.5933	21.4664	21.301	21.813	21.4771	21.8987	22.7729	20.5612	21.6569	20.4115	21.4703	21.3219	22.5849	22.8353	22.4071	21.2856	22.0736	21.982	22.3839	22.4612	21.2202	22.8692	22.5949	22.5787	23.2708	22.9074	23.7204	24.0203	22.6036	23.4686	23.1788	23.8524	23.0147	0	0	0	0	0	0	0	0	0	1	0	0	0	0
24.6086	24.6683	24.9224	24.2711	24.3787	24.5259	24.6489	24.2504	23.9051	24.5755	24.4349	24.6009	24.3526	24.2105	24.213	24.6975	24.8597	24.7161	26.7266	27.0662	26.2792	26.5201	26.3799	26.5594	28.461	28.7996	28.7651	26.4073	26.5143	26.4772	26.4963	26.7954	26.4091	26.9615	26.9393	27.1785	2	5	2	2	2	2	1	1	1	2	2	3	2	3
20.1862	20.7587	20.553	19.6894	19.4093	19.4503	20.2267	19.989	19.6735	NaN	19.9093	20.6292	19.9701	20.9075	19.0455	20.6421	20.2367	21.1283	20.2238	20.3315	22.8147	21.6121	21.2077	21.6777	22.3225	22.9113	21.6543	20.7331	21.0473	20.0832	19.5901	19.562	21.4046	19.6308	19.639	19.5084	0	0	0	0	0	0	0	0	0	0	0	0	0	0
NaN	NaN	NaN	NaN	NaN	NaN	NaN	NaN	NaN	NaN	NaN	NaN	NaN	NaN	NaN	NaN	NaN	NaN	NaN	NaN	NaN	NaN	NaN	NaN	18.8405	19.7542	19.8741	NaN	NaN	NaN	NaN	NaN	NaN	NaN	NaN	NaN	0	0	0	0	0	0	0	0	0	0	0	0	0	0
24.3746	24.7522	24.7047	25.1382	25.1474	25.2773	24.6814	24.9345	25.5778	24.7184	25.0915	25.0734	24.7442	24.9228	24.5978	24.5254	24.451	24.2	27.402	27.0875	27.3413	26.7239	26.754	26.1872	25.9584	25.9926	25.7665	26.7443	26.7266	26.4401	26.5314	26.6656	26.4171	26.1446	26.0176	25.8789	3	3	2	4	5	4	2	4	4	1	5	3	3	2
21.8497	21.1617	21.2813	20.8441	20.8601	21.0673	20.9117	20.6121	20.8414	20.6243	20.8891	20.8153	20.4137	20.5955	20.5939	22.7049	20.22	20.6805	19.4539	NaN	NaN	NaN	19.529	NaN	19.4619	18.5379	18.6416	19.326	NaN	19.1131	NaN	NaN	19.3355	NaN	NaN	NaN	1	0	0	0	0	0	0	0	0	0	0	0	0	0
NaN	21.9635	22.2528	22.4808	22.5913	23.45	21.3892	23.6072	22.6975	22.4787	NaN	NaN	21.9573	20.0253	NaN	21.5775	22.1501	22.2144	NaN	NaN	NaN	NaN	NaN	NaN	21.8742	21.6953	21.9635	NaN	NaN	NaN	19.9063	NaN	NaN	NaN	21.6037	20.2785	0	0	0	0	0	1	0	0	0	0	0	0	0	0
19.4054	18.8638	18.1581	18.8952	19.4766	19.1472	19.0848	19.211	19.5239	19.6223	20.2921	20.3532	20.0446	21.0021	20.6251	19.2934	NaN	NaN	22.5155	22.3074	23.0699	21.7863	21.9966	22.1818	22.7559	23.0118	23.1314	21.1085	21.484	21.9279	22.9971	22.648	23.1901	22.8162	22.8972	23.1114	0	0	0	0	0	0	0	0	0	0	0	1	0	1
21.6672	21.4331	21.1421	21.2096	21.6177	21.6587	23.0453	21.9472	22.879	22.5204	22.1917	24.4282	21.9134	22.2616	23.1281	20.3493	20.1984	19.9388	20.8433	20.833	20.847	20.4763	20.8485	20.7263	NaN	NaN	NaN	20.5626	20.7078	20.9406	20.5076	20.4002	20.451	20.4536	20.2486	20.7989	0	0	0	0	0	0	2	0	1	1	0	3	0	1
NaN	NaN	NaN	NaN	NaN	NaN	NaN	NaN	NaN	NaN	NaN	NaN	NaN	NaN	NaN	NaN	NaN	NaN	20.8982	23.5387	24.6656	25.1482	23.6808	26.8274	21.159	21.3884	21.318	25.0481	23.2324	24.2166	23.1986	23.867	22.3031	22.3048	21.8079	22.0507	0	0	0	0	0	0	0	0	0	0	0	0	0	0
19.252	NaN	19.7151	20.2563	20.3233	20.3293	20.1448	20.0542	NaN	19.6792	20.8973	19.855	19.3996	NaN	NaN	20.7253	20.6409	20.5758	20.3422	21.1134	20.3676	NaN	21.3175	NaN	NaN	NaN	NaN	20.1525	20.9273	20.1854	20.1049	20.9454	19.7097	20.0398	20.1249	20.0196	0	0	0	0	0	0	0	0	0	0	1	0	0	0
26.5359	26.5638	26.7094	25.9254	25.6973	26.1612	26.7744	25.9197	25.4378	25.4947	25.648	24.1215	25.5581	24.7226	24.0997	23.987	23.8917	23.9636	NaN	20.3086	NaN	NaN	18.9154	21.0403	NaN	17.8849	18.2217	NaN	17.6667	17.2414	NaN	NaN	NaN	NaN	NaN	NaN	7	8	8	6	5	7	10	8	4	8	6	3	8	5
21.1331	21.4785	20.9312	NaN	21.5989	20.8513	20.0501	19.7362	20.4695	20.4721	20.4264	20.5441	20.2621	19.9455	20.9789	20.5616	21.0817	21.2235	19.5631	19.7298	19.4507	19.9119	20.1052	20.8391	21.0385	20.8255	21.1158	19.5861	19.6529	19.8448	19.2188	19.3216	18.8197	20.6055	20.1886	20.1078	1	1	0	0	1	1	0	0	0	0	0	0	0	0
19.0026	19.8461	22.0548	19.5965	20.3366	19.234	NaN	NaN	NaN	19.0113	NaN	NaN	20.3426	NaN	19.1804	NaN	NaN	NaN	19.7508	19.7391	20.8217	22.7367	23.1253	23.3449	23.5089	23.7093	22.5607	22.092	23.3038	23.2782	22.7741	22.5938	23.4331	22.6495	23.2174	22.9441	0	0	1	0	0	0	0	0	0	0	0	0	0	0
18.6348	18.9318	19.4277	19.9034	19.474	19.789	19.9823	19.8132	19.9701	19.6596	19.6278	21.0501	19.6642	NaN	20.3564	NaN	NaN	NaN	NaN	NaN	NaN	NaN	NaN	NaN	NaN	NaN	NaN	NaN	NaN	NaN	NaN	NaN	NaN	NaN	NaN	NaN	0	0	0	0	0	0	0	0	0	0	0	1	0	0
20.4395	20.3155	20.7576	20.2642	20.2743	20.2101	20.9348	20.6966	NaN	NaN	NaN	NaN	20.2618	NaN	20.4273	20.3121	NaN	19.7329	20.5623	20.6425	20.7927	20.072	20.412	20.8419	20.8537	20.1903	20.6281	20.6924	20.7892	NaN	20.3198	20.2608	20.1226	20.656	20.7184	20.8396	0	0	0	0	0	0	0	0	0	0	0	0	0	0
27.5172	27.4765	27.3023	27.2245	27.3084	27.2968	27.609	27.565	27.0097	27.5838	27.6468	27.7277	27.8627	27.5859	27.9163	28.2687	27.5953	28.0204	29.7714	29.1227	28.1118	29.0943	28.4217	28.533	27.2579	27.067	27.9028	28.8961	28.8905	28.6776	28.2711	29.0948	28.8249	28.7353	28.0383	28.2328	8	8	8	9	9	8	7	7	7	8	8	9	14	6
22.5446	22.1754	22.7227	22.8	23.1317	23.8522	22.1745	23.4074	23.0001	22.6076	22.0897	21.6644	21.8654	21.9352	21.8585	21.9763	22.9352	22.1939	NaN	20.4467	NaN	NaN	19.8483	NaN	22.302	22.3974	22.0385	19.6056	19.8016	20.1115	NaN	20.0125	NaN	20.3189	20.4415	19.5668	2	1	1	1	2	3	1	1	1	1	2	0	0	1
NaN	NaN	NaN	NaN	NaN	NaN	NaN	NaN	NaN	NaN	NaN	NaN	NaN	NaN	NaN	NaN	NaN	NaN	NaN	NaN	18.8211	18.4063	18.2428	20.5993	NaN	NaN	NaN	18.2701	18.199	17.4836	17.7437	17.7251	NaN	NaN	17.5806	17.9564	0	0	0	0	0	0	0	0	0	0	0	0	0	0
23.7765	24.0835	24.3416	25.5678	25.409	25.6222	20.8136	22.3504	24.3778	27.1214	24.3054	24.9214	24.2748	27.5042	24.3461	24.3637	24.6183	22.8444	19.3102	19.5902	18.938	18.0167	21.0147	18.2128	21.5261	21.7704	21.0743	19.7559	19.89	21.0323	20.3346	19.7272	21.8717	20.0823	20.911	20.215	2	2	3	2	3	3	0	2	2	4	1	3	3	6
18.9738	19.8114	19.1213	18.5615	18.6705	18.6433	18.3091	18.4312	18.5352	18.7191	18.7123	18.5352	18.8373	18.3967	19.0537	18.6675	18.6341	18.8885	NaN	NaN	NaN	NaN	NaN	NaN	18.5903	18.2617	18.1379	NaN	NaN	NaN	18.0435	NaN	NaN	NaN	NaN	NaN	0	1	0	0	0	0	0	0	0	0	0	0	0	0
NaN	NaN	NaN	NaN	NaN	NaN	NaN	NaN	NaN	NaN	NaN	NaN	NaN	NaN	NaN	NaN	NaN	NaN	NaN	NaN	20.7749	21.1252	NaN	21.5384	21.2445	21.1734	21.3921	21.772	21.3161	21.2402	21.0432	21.0346	NaN	21.731	22.0635	22.1383	0	0	0	0	0	0	0	0	0	0	0	0	0	0
26.4461	26.5928	26.7341	25.6812	25.0767	25.5631	25.3611	25.119	25.7227	25.3292	25.1492	25.4784	25.0565	25.5206	25.605	26.4769	26.7738	25.9892	19.4112	19.0355	20.0577	19.319	19.2198	21.047	22.6146	23.1722	23.1817	19.474	19.7143	19.6952	19.6962	20.2467	19.5196	20.1726	21.724	20.5601	3	4	4	1	1	1	2	1	2	2	2	5	2	1
NaN	NaN	18.9897	18.6798	NaN	22.3083	19.3895	19.5462	19.3147	18.86	19.4078	19.1511	NaN	18.6609	19.4841	22.107	22.3008	22.2944	NaN	19.407	NaN	18.6612	18.4163	NaN	22.3988	19.4775	19.7605	19.1931	17.5919	18.4908	18.6025	18.216	18.5518	19.2736	19.2085	19.5307	0	0	0	0	0	1	0	0	0	0	0	0	0	0
NaN	NaN	NaN	NaN	NaN	NaN	NaN	NaN	NaN	NaN	22.2633	NaN	NaN	21.4218	NaN	NaN	NaN	NaN	21.6823	21.5893	21.82	21.3271	21.6642	21.5932	22.5218	22.1472	22.2658	26.4237	25.5887	25.3956	20.9478	21.4843	21.3502	21.6973	21.2394	21.458	0	0	0	0	0	0	0	0	0	0	0	0	0	0
21.9338	22.1691	22.1996	21.6047	21.7137	21.151	20.8607	21.2741	21.1926	21.3073	20.6737	21.0744	21.2509	20.9616	NaN	20.2915	NaN	20.5218	20.2496	20.5502	20.1631	20.359	20.4657	20.9968	23.5523	22.7118	24.1388	20.4872	21.3539	20.2477	20.7692	21.256	20.2019	NaN	NaN	NaN	1	1	1	0	0	0	0	0	0	0	0	0	0	0
22.6583	23.6253	22.3555	23.163	23.3705	23.5109	24.4179	23.3953	23.4238	25.0871	24.3843	23.9654	24.9232	25.0975	24.8797	22.9215	23.8402	22.5306	22.8312	23.7312	24.8915	23.8476	23.4526	26.5353	23.4628	23.2128	24.1355	22.9654	23.4473	22.339	21.3905	21.8281	22.8266	21.9834	22.1323	21.566	1	1	1	1	1	2	3	0	1	4	2	1	5	5
20.0164	21.2056	20.4907	20.4594	20.9642	20.7302	21.4339	19.5682	21.1233	20.1258	21.1794	19.6118	20.1117	20.8454	19.3251	18.9621	18.6076	18.9024	NaN	18.6661	19.117	20.3844	20.7181	NaN	17.6632	18.4066	18.2123	NaN	NaN	NaN	NaN	NaN	NaN	NaN	NaN	NaN	0	1	0	1	1	1	1	0	1	0	1	0	0	1
21.3177	21.3384	21.3446	21.0861	21.3013	20.8062	20.9925	20.7984	21.2223	21.3816	21.6895	21.4944	20.6522	20.9111	21.0201	20.7336	20.9913	20.7466	24.767	24.5449	24.0925	24.1304	23.5376	23.8274	24.7215	24.8415	24.7267	23.8911	23.5739	23.6145	23.0767	23.2273	22.3807	23.9151	23.3612	23.5946	0	0	0	0	0	0	0	0	0	0	0	0	0	0
NaN	NaN	18.8015	18.892	NaN	18.7457	NaN	19.39	18.8032	18.7647	18.666	19.5216	19.2911	17.8377	NaN	19.2665	19.3406	NaN	21.1271	19.9073	22.3554	19.5832	21.138	19.7899	20.8299	22.1832	22.0075	21.302	20.215	20.8067	20.2969	19.2293	20.6478	20.88	20.8464	20.0596	0	0	0	0	0	0	0	0	0	0	0	0	0	0
NaN	NaN	NaN	17.0035	16.9824	NaN	16.6929	19.0935	19.0771	18.461	17.8197	18.1279	NaN	18.5179	NaN	NaN	NaN	16.9014	17.7249	18.0436	19.0346	18.6116	20.5446	20.569	20.2412	19.0597	17.3777	20.5461	20.8486	22.0158	20.5551	NaN	21.2473	NaN	19.7498	21.184	0	0	0	0	0	0	0	0	0	0	0	0	0	0
NaN	20.2729	20.4715	NaN	20.5283	20.1862	NaN	20.2219	20.2783	19.6863	20.0522	20.1872	20.317	NaN	NaN	NaN	NaN	NaN	20.1427	20.5481	21.3528	20.3222	20.2452	NaN	NaN	NaN	20.2932	21.0366	20.5902	21.1543	21.1742	21.1751	21.5026	20.1744	20.6339	20.0957	0	0	0	0	0	0	0	0	0	0	0	0	0	0
21.796	21.9573	22.259	22.4878	21.7669	22.2802	21.7872	22.8103	22.3014	22.2765	22.1357	22.3484	22.4119	21.8243	22.6191	23.4738	23.7422	23.6464	21.0213	21.8708	21.6413	21.7236	21.1123	21.6089	20.9011	22.1518	21.701	21.4109	21.2606	21.1891	21.1723	21.1677	21.4751	21.7076	21.4861	21.8776	2	1	1	2	0	2	0	3	1	2	1	1	1	0
19.4538	19.346	NaN	NaN	NaN	19.2925	19.4927	20.4677	NaN	NaN	20.1819	19.3642	20.3988	NaN	NaN	22.1445	23.0768	21.9148	NaN	NaN	NaN	NaN	NaN	NaN	NaN	NaN	17.7655	NaN	NaN	NaN	NaN	NaN	NaN	NaN	NaN	NaN	0	0	0	0	0	0	1	1	0	0	0	0	1	0
18.1628	18.3179	18.2807	18.2457	18.5896	18.4092	NaN	18.4163	18.077	17.8811	17.5039	17.8914	17.9806	18.1384	17.9309	19.172	NaN	19.5815	17.2977	18.1823	18.6224	18.6451	18.6057	17.4206	20.6143	19.6764	20.7071	18.1232	18.3711	17.7483	18.2655	19.6931	18.097	19.6917	20.1377	19.6126	0	0	0	0	0	0	0	0	0	0	0	0	0	0
18.721	NaN	19.4811	NaN	18.8222	NaN	NaN	NaN	NaN	NaN	NaN	NaN	NaN	NaN	NaN	NaN	NaN	NaN	21.0594	21.5788	21.9842	21.6529	22.4815	21.3121	19.7183	21.0368	21.0028	21.1255	21.1127	21.4057	21.1806	21.8206	20.6286	20.8864	20.7534	20.1319	0	0	0	0	0	0	0	0	0	0	0	0	0	0
17.0857	16.7599	17.9132	19.9123	20.2087	19.349	16.7651	17.7622	18.5045	21.3683	18.2679	18.6156	18.3423	18.6257	18.6023	17.9854	18.2714	17.7515	NaN	NaN	NaN	NaN	NaN	NaN	NaN	NaN	NaN	NaN	NaN	NaN	NaN	NaN	NaN	NaN	NaN	NaN	0	0	0	1	1	0	0	0	0	1	0	0	0	0
20.8843	20.1581	19.7586	19.4825	19.5902	19.7263	19.8969	19.0311	19.2644	19.7686	19.6495	20.2599	19.6111	20.2792	19.4139	19.2921	19.6282	19.0077	22.4978	20.1641	19.6341	19.5381	19.4968	19.6673	20.3064	19.354	19.0326	NaN	19.4778	19.5629	18.9679	19.2914	18.848	19.5239	18.9228	19.2119	1	0	0	0	0	0	0	0	0	1	0	0	0	0
NaN	20.2504	20.1526	20.3851	20.1752	20.4809	19.7023	20.0143	19.9958	19.9909	20.1273	NaN	19.6465	19.2278	19.1982	19.5019	20.3693	20.0434	NaN	NaN	19.5525	NaN	18.9962	19.6303	NaN	NaN	NaN	19.6244	19.5159	19.9538	NaN	19.7494	19.4736	19.6189	NaN	NaN	0	0	0	0	0	2	0	0	0	0	0	1	0	0
29.2367	28.9232	28.3036	29.3331	29.3791	29.4238	29.8069	31.111	29.9292	29.5535	29.5679	29.8087	29.5689	29.2045	29.8059	31.0373	31.1515	31.2318	28.8349	28.989	29.0559	29.1658	29.1047	30.3028	29.2791	29.3813	29.7961	28.5317	28.4795	28.3324	27.855	28.0694	27.9571	29.0354	29.1818	29.1581	27	29	11	30	33	30	43	73	43	33	29	40	36	25
18.7543	18.7624	17.9714	17.8438	17.9062	NaN	18.3276	18.362	NaN	17.7346	18.6766	18.1293	NaN	18.0265	18.1823	18.6268	18.1215	18.217	18.9697	19.3278	17.5309	18.8387	18.6405	18.4598	19.473	20.2501	18.9381	18.4185	18.5166	18.7356	NaN	NaN	17.8246	NaN	NaN	NaN	0	0	0	0	0	0	1	0	0	0	0	0	0	0
18.8385	18.9717	19.4865	20.0184	18.7899	18.775	17.8703	19.1157	18.7592	18.9907	18.8786	18.9594	18.3463	18.8349	18.7526	18.6317	NaN	19.0055	NaN	18.1221	17.7637	18.3186	18.8132	18.3702	20.0121	18.4991	18.7213	17.9047	18.3275	17.8226	18.1557	18.3492	18.7933	21.9708	19.3229	19.107	0	0	0	1	0	0	0	0	0	0	0	0	0	0
28.7725	28.7671	28.7789	28.6444	28.7863	28.769	28.796	28.3026	28.6493	28.897	29.1632	29.0324	29.3143	29.1893	29.1343	28.2599	28.0257	27.7839	27.7316	27.4714	28.1737	27.4027	28.1114	28.154	26.6168	26.6269	26.4102	27.998	27.7759	27.955	27.8873	27.3482	28.3639	27.2902	27.5988	27.349	24	23	30	25	25	27	24	26	22	29	27	32	33	31
25.0403	24.801	26.1958	25.6612	25.742	25.7296	25.9261	25.9645	26.4221	25.551	25.9292	26.146	25.2999	25.8309	26.1333	26.3244	26.3175	26.1935	24.5647	24.9069	25.5331	25.8699	25.8104	23.427	25.9976	26.0236	24.9432	26.2349	26.5042	26.8957	27.0417	26.7256	26.8985	26.3875	26.4936	26.6752	1	2	2	3	5	3	3	5	5	3	2	2	4	2
NaN	NaN	NaN	NaN	NaN	NaN	NaN	19.0621	18.5226	19.2639	20.9925	NaN	19.1904	20.3621	20.4158	18.9742	NaN	18.6428	NaN	NaN	NaN	NaN	NaN	NaN	NaN	NaN	NaN	NaN	NaN	NaN	NaN	NaN	NaN	NaN	NaN	NaN	0	0	0	0	0	0	0	0	0	0	1	0	0	1
24.0787	24.503	24.9615	23.8547	24.2072	23.7621	25.4054	23.8799	25.2496	24.1272	24.3092	24.3911	23.8858	23.3574	23.3769	22.7714	22.6944	22.6124	17.8979	17.9157	19.9388	17.9521	21.5293	20.0047	NaN	17.784	17.0505	18.3548	18.8533	19.061	20.455	19.9843	20.5854	19.5889	18.7697	18.4241	2	2	2	2	2	2	2	2	2	2	2	2	2	2
26.904	26.9333	27.6803	28.062	27.934	27.6323	28.6337	28.4176	28.9682	28.5543	28.451	28.3263	28.2249	28.4527	28.6918	27.6161	27.9266	27.4013	23.9315	23.9088	25.5065	24.9717	25.5317	26.062	24.4906	24.3136	24.0833	24.7739	25.4495	24.8278	25.2838	25.2893	25.5195	25.89	24.9553	24.9924	8	8	11	16	13	17	16	21	21	16	18	17	14	16
25.5525	25.5819	25.1982	25.8178	25.6372	25.945	25.4175	26.2367	25.3836	25.5654	25.2289	25.5386	24.8945	24.9254	25.5585	26.5553	26.5962	27.1132	23.8469	24.1791	24.4153	25.0583	24.6187	24.3529	26.7608	26.5512	26.771	23.9872	24.2355	24.0768	24.4122	24.191	24.4629	25.1178	25.3133	25.3161	5	4	3	4	5	2	2	4	2	4	4	3	2	3
NaN	NaN	19.2868	NaN	NaN	NaN	NaN	19.8869	19.6666	19.194	18.983	NaN	NaN	NaN	NaN	NaN	NaN	NaN	25.3333	25.4696	23.8306	25.1915	24.3661	23.5954	24.4682	24.823	25.2386	24.9174	24.6398	24.1532	24.5586	25.6008	23.6526	25.3333	24.4754	24.4947	0	0	0	0	0	0	0	0	0	0	0	0	0	0
20.4754	20.9079	20.6509	20.946	20.8219	20.949	20.8109	21.0768	21.5477	20.6676	20.2212	21.4026	20.5355	21.0909	20.6059	22.4549	22.1862	22.8185	NaN	NaN	NaN	NaN	NaN	NaN	21.1167	21.0649	20.5868	NaN	NaN	NaN	NaN	NaN	NaN	NaN	NaN	19.8938	1	1	0	0	0	1	1	1	1	0	1	0	0	0
NaN	NaN	NaN	NaN	NaN	NaN	NaN	NaN	NaN	NaN	NaN	NaN	NaN	NaN	NaN	NaN	NaN	NaN	18.9422	18.7561	18.5806	19.5249	19.3959	NaN	NaN	NaN	NaN	19.4018	19.3943	19.5279	NaN	19.1144	19.3188	19.0546	NaN	NaN	0	0	0	0	0	0	0	0	0	0	0	0	0	0
26.9149	27.0672	27.1649	26.7772	26.8246	26.6637	26.627	26.7199	26.6189	26.5989	26.6647	26.7895	27.0395	26.8802	26.9109	25.9676	25.6423	25.7983	25.7042	25.2401	25.8559	25.5477	26.3259	25.5963	24.1301	24.8683	24.5832	25.9919	25.8509	25.9498	25.8808	25.3107	25.6711	25.2469	25.6511	25.3438	13	10	7	14	15	13	13	12	11	11	12	14	19	13
25.4028	25.5896	25.4138	25.5937	25.61	25.284	25.5499	25.472	26.1208	25.0455	24.9917	25.5463	25.2933	25.3071	25.8238	26.8533	26.5567	26.5263	22.3375	22.4089	22.8054	22.2247	22.2895	23.6879	24.3921	23.205	24.1953	21.9906	23.4946	22.1703	22.1727	22.0657	21.7648	23.5228	23.6447	23.3685	3	3	2	4	3	6	5	4	6	2	4	1	5	2
26.7856	26.7637	26.4059	26.9483	26.6297	26.5675	26.5751	26.92	26.4699	26.5889	26.4614	26.7868	25.9053	26.7256	26.988	28.3533	28.28	28.9397	23.7268	24.0698	23.9773	23.9976	23.465	23.7907	27.152	26.9231	26.5747	23.2372	23.4227	23.151	22.9625	21.756	23.308	23.5832	25.5832	25.4949	5	3	2	3	3	2	2	7	3	2	4	4	2	5
NaN	NaN	NaN	NaN	NaN	NaN	NaN	NaN	NaN	NaN	NaN	NaN	NaN	NaN	NaN	NaN	NaN	NaN	20.7772	20.3126	19.9416	20.5791	20.594	20.4009	NaN	19.8165	19.9749	20.2626	20.5541	19.8582	19.813	19.7399	20.0194	20.0405	19.8091	20.0102	0	0	0	0	0	0	0	0	0	0	0	0	0	0
18.3321	18.2821	18.3105	18.7761	19.1629	19.0549	18.6304	18.3091	18.7394	18.2904	18.3911	18.7666	18.3606	19.1407	17.9021	18.838	18.7735	18.4494	17.9738	NaN	NaN	NaN	NaN	NaN	NaN	NaN	NaN	NaN	NaN	NaN	NaN	NaN	NaN	NaN	NaN	NaN	0	0	1	1	2	0	1	0	0	0	0	0	0	0
26.6937	28.1825	28.3645	28.8106	28.7076	28.1426	17.9	19.0895	21.0282	27.778	22.1331	23.5372	22.6476	28.5771	24.879	18.6656	23.2912	18.2246	18.0688	19.5337	18.9248	18.5677	19.1526	18.2134	23.21	21.4335	20.4676	17.7758	21.6645	18.3918	17.8816	19.3805	17.8902	17.3597	18.7222	17.7805	4	5	5	5	6	5	0	0	0	5	0	1	2	6
NaN	NaN	20.5524	NaN	NaN	NaN	NaN	NaN	NaN	NaN	NaN	NaN	NaN	NaN	NaN	18.2168	NaN	NaN	20.2282	20.3034	25.2545	24.0132	24.5038	28.4007	20.1331	20.2983	23.9869	21.395	21.0194	21.1665	20.8936	20.8775	20.8607	22.5107	23.1746	22.447	0	0	0	0	0	0	0	0	0	0	0	0	0	0
24.2325	24.3944	24.7727	25.2634	24.8583	22.2089	22.6438	24.6764	25.162	24.8124	23.7045	23.7361	22.4733	23.4924	24.7588	24.7375	24.9146	24.8462	23.9718	24.3994	23.6947	24.7524	24.8115	25.9267	NaN	24.9947	24.902	25.4021	24.9825	25.2177	25.5427	24.5834	25.3812	26.21	24.9802	25.8507	0	0	0	1	0	0	0	0	0	0	0	0	0	0
18.0725	17.6992	17.6034	17.3063	17.4244	17.1778	17.7074	NaN	NaN	17.6158	NaN	17.2314	18.4289	17.7663	17.9351	NaN	NaN	NaN	18.1671	17.4091	17.9136	18.9173	17.95	17.984	NaN	17.7964	17.4417	17.4713	17.6381	17.7595	17.7871	17.566	18.0285	17.719	NaN	17.7983	0	0	0	0	0	0	0	0	0	0	0	0	0	0
26.2936	26.5097	27.2677	26.7189	27.2652	27.0991	26.4779	27.6078	27.4299	26.8717	26.8449	26.5542	26.6622	27.4716	26.5207	25.1146	24.8976	25.4231	28.0687	28.2394	29.3501	27.8078	28.4339	28.7933	27.1258	27.2748	27.3911	27.15	28.2697	28.1669	28.4249	28.5489	28.4317	27.958	28.4603	28.2756	0	2	1	1	2	1	2	2	1	1	1	1	0	1
21.8184	22.8782	22.0084	21.8109	22.4648	22.0494	21.7101	22.2052	24.1694	22.0447	21.3033	21.9135	21.4003	21.6619	21.5816	23.9786	24.3359	22.3012	19.6988	19.7706	19.4121	19.9634	19.9536	20.8635	19.6142	19.8606	19.4697	19.5599	19.4796	19.5277	18.8218	18.7381	19.1802	19.7231	19.4604	19.4285	0	1	0	0	1	0	0	0	1	0	0	0	0	0
20.8947	19.3702	18.1482	18.2559	18.9074	19.0928	18.3277	18.8767	20.7012	18.2511	19.6596	20.297	19.1712	19.9375	19.8992	22.2274	20.4554	22.4961	19.2961	19.0834	19.0352	19.6039	18.8699	18.9934	22.4787	21.0165	21.2094	19.572	19.1595	20.3982	19.3266	20.6928	18.3318	19.161	19.3173	20.5111	1	0	0	0	0	0	0	0	0	0	0	0	0	0
19.5711	19.4646	19.2178	18.6924	18.8615	18.9401	18.9245	18.5617	18.8249	19.3675	19.4749	19.2918	19.7063	19.2435	19.5676	NaN	18.2811	NaN	NaN	NaN	NaN	19.4324	19.1865	19.0359	18.3764	18.1737	NaN	19.0329	19.3556	18.8454	NaN	NaN	NaN	NaN	NaN	NaN	0	1	0	0	0	0	0	0	0	0	0	0	0	0
23.0956	22.8326	22.7398	22.3063	22.5921	22.1567	22.304	21.3639	22.3131	22.8087	22.6049	23.0598	22.5183	22.6976	23.246	22.731	22.4805	22.5452	22.2806	22.8562	22.1739	23.2313	23.3281	23.9261	23.396	23.2076	23.6106	23.3055	22.9069	22.8027	23.0015	22.7887	23.0341	23.5556	24.2867	23.9759	0	0	0	0	0	0	0	0	0	0	0	1	1	0
19.0441	NaN	NaN	NaN	NaN	NaN	NaN	NaN	NaN	22.9153	21.3481	22.6898	NaN	23.9035	23.1904	19.9623	NaN	NaN	NaN	NaN	NaN	NaN	NaN	NaN	NaN	NaN	NaN	NaN	NaN	NaN	NaN	NaN	NaN	NaN	NaN	NaN	0	0	0	0	0	0	0	0	0	0	0	0	0	2
NaN	NaN	NaN	NaN	NaN	NaN	NaN	NaN	NaN	NaN	NaN	NaN	NaN	NaN	NaN	NaN	NaN	NaN	18.7688	19.0926	20.0128	18.8677	18.9117	19.0395	NaN	NaN	NaN	18.68	NaN	18.7169	NaN	18.639	18.4037	19.0683	19.1972	NaN	0	0	0	0	0	0	0	0	0	0	0	0	0	0
27.3957	27.6415	27.9591	27.5302	27.469	27.7374	27.8	27.6414	27.5218	27.2861	27.4097	27.511	27.2628	27.2069	27.4784	28.3367	28.5092	28.4567	24.8927	25.1092	25.1862	25.5764	25.3488	25.1795	26.0507	25.9384	26.1683	25.2706	25.3753	25.2652	25.1948	25.2932	24.9738	25.7835	25.4844	25.5598	7	9	4	5	7	5	5	5	7	4	7	4	3	5
23.6796	23.4042	22.7898	24.103	23.4169	23.5705	23.9056	22.4262	24.0874	24.5311	23.9064	23.8628	23.5308	25.0647	24.3749	24.6533	24.3036	24.8286	18.0005	NaN	NaN	NaN	20.2079	NaN	19.5285	20.2411	20.3676	NaN	20.3916	17.4527	NaN	NaN	19.2903	20.7824	18.6233	18.8638	4	3	3	4	3	3	2	2	3	4	5	4	2	2
27.2953	27.2727	27.5345	27.3442	27.4163	27.443	27.0977	27.5236	28.1208	27.4282	27.6842	27.3912	27.1774	27.7246	27.2436	26.7927	26.8371	27.0509	27.6108	27.5711	27.7462	27.4338	27.6179	28.1593	27.3757	27.2739	27.3386	27.3757	27.5775	27.5322	28.0944	28.0637	26.7932	27.6491	27.5511	27.5339	17	18	16	13	12	16	12	14	25	16	27	13	14	28
28.8829	29.138	28.541	28.826	28.7757	28.8322	28.9876	28.8246	28.6457	29.1109	29.0262	28.8991	28.8976	28.9663	28.8923	29.0531	28.8201	29.0059	30.7239	30.5761	29.4648	30.6294	29.6933	30.4386	28.2298	28.6054	28.9306	30.3919	30.2437	30.1813	29.6801	30.3414	30.0272	30.0797	29.6683	29.6332	8	9	7	10	8	9	9	7	9	10	7	8	11	7
25.3135	25.3131	25.143	25.0676	25.2723	25.5884	26.0332	25.6845	25.3024	25.3386	25.5123	25.1994	25.8543	25.1646	25.3629	23.64	23.6618	24.1698	27.0968	26.4112	26.2394	26.3783	26.0148	25.1903	24.9096	25.5024	24.8018	26.5009	26.4615	26.275	26.1041	25.9213	26.5611	25.5734	25.598	25.4177	2	2	2	2	2	2	2	2	2	3	3	3	2	2
18.7917	18.755	18.7609	18.8927	18.9919	18.9393	NaN	NaN	18.7663	18.8969	18.9299	NaN	18.3307	18.9502	18.8335	18.861	18.3565	18.5402	20.6247	22.5863	20.6326	22.4605	20.8535	20.3906	NaN	NaN	NaN	21.5072	21.5619	21.2441	22.3984	22.5014	22.4699	21.7068	22.2896	21.3046	0	0	0	0	0	0	0	0	0	0	0	0	0	0
23.2866	22.9808	23.3439	21.6619	21.5789	21.6922	23.5077	22.8612	21.7267	22.354	22.4793	20.9015	21.9661	22.2759	22.1725	22.3844	21.5777	22.4451	22.1095	21.9505	24.5916	22.1654	22.3471	24.4599	21.048	20.8365	20.9672	22.6085	22.3709	21.8448	22.1455	22.0552	22.3807	21.7037	20.8452	21.3049	2	1	1	0	0	0	1	1	0	0	1	0	0	0
NaN	NaN	NaN	18.0459	18.7034	NaN	NaN	18.2764	NaN	17.8839	NaN	NaN	17.8467	NaN	NaN	18.3403	NaN	17.8619	NaN	NaN	NaN	17.9031	NaN	18.1255	19.7238	21.5685	20.7053	18.4586	18.192	NaN	NaN	NaN	NaN	18.5842	18.6635	NaN	0	0	0	0	0	0	0	0	0	0	0	0	0	0
22.7786	23.0671	22.271	22.0177	22.117	22.2574	22.6269	22.2918	22.2639	22.0176	22.2396	21.8854	21.8331	22.1387	22.3516	22.5803	23.1263	22.3127	23.1201	22.9581	21.795	22.87	22.6351	22.8846	22.7018	22.692	22.7181	22.8298	22.8427	22.5689	22.7043	22.5674	22.5046	22.8201	22.7918	23.0796	1	1	0	0	0	0	1	0	1	0	1	0	0	0
27.6025	27.8052	28.1318	27.5252	28.037	28.172	27.9544	28.3147	28.8527	27.7019	27.6813	27.5837	27.6587	28.3321	28.0827	26.4489	27.2862	27.2133	26.3807	26.5452	28.0956	27.3361	27.0304	27.7737	27.8712	27.6516	26.6129	27.4257	27.5069	27.6039	28.157	27.657	28.715	27.0399	27.4213	27.2314	2	1	2	2	1	2	3	3	2	2	2	3	2	2
21.1443	20.9237	21.072	20.812	20.9269	20.9281	20.6255	20.4426	20.5453	21.0021	21.0579	22.1108	20.4209	20.5681	21.3259	20.2229	20.1691	20.1557	23.9458	23.357	22.117	22.8471	22.0967	22.1293	23.2017	23.0294	23.2029	21.4917	21.1763	21.4544	21.3016	22.4647	21.19	23.6762	22.0392	22.11	0	0	0	0	0	0	0	0	0	0	0	1	0	0
28.1946	27.9228	27.2879	26.9468	27.179	27.3313	28.6423	27.6596	27.7156	28.1917	28.0684	28.1465	28.4282	27.505	28.3043	26.6075	26.6849	26.7027	29.2554	29.3457	30.0108	29.1622	29.4068	29.7964	27.7993	27.9024	27.6173	29.6125	29.7264	29.6307	29.3757	29.0419	30.3744	28.7245	28.8431	28.841	15	19	10	8	9	11	17	12	10	13	15	13	17	12
NaN	NaN	NaN	NaN	NaN	NaN	NaN	NaN	NaN	NaN	NaN	NaN	NaN	NaN	NaN	NaN	NaN	NaN	20.0068	19.6015	18.7906	19.4752	19.1948	NaN	19.9114	20.5928	19.4405	22.7132	18.5424	19.1049	18.4478	18.5152	18.0258	19.7708	18.9272	17.9672	0	0	0	0	0	0	0	0	0	0	0	0	0	0
26.5871	26.8455	27.1333	26.8561	26.6581	26.8307	27.2063	27.2647	27.3852	27.0586	26.8648	26.9702	26.915	27.3122	27.0809	26.6101	26.8712	27.1068	28.9054	29.2276	28.9488	28.7444	28.7649	28.8294	30.19	30.4179	30.462	28.829	29.128	29.0089	28.7772	28.6639	29.0592	28.6281	28.9772	28.6736	1	4	2	3	4	3	4	3	4	3	3	2	3	3
18.5948	19.5997	18.9792	20.1108	19.8508	20.285	20.1531	21.4925	21.1694	21.1291	22.0644	20.9608	21.1917	21.4682	21.4927	19.997	20.161	NaN	23.5095	23.3391	23.6844	23.3358	23.9296	23.4125	24.5476	24.4342	24.6694	23.9426	23.7866	23.5134	23.71	23.5575	23.9829	23.6796	24.0218	23.8633	0	0	0	0	0	0	0	1	1	0	1	0	1	1
24.3515	24.3462	24.4078	23.7869	23.9593	24.0499	23.9544	23.5076	23.0327	23.7085	23.7585	23.8224	23.3034	23.2905	23.4387	24.0966	24.0599	24.2912	22.6353	22.9062	22.7607	22.9934	22.6998	23.9672	24.2547	24.0345	24.0525	22.7447	22.6221	22.3743	22.2748	22.2307	21.8277	22.5379	23.1414	23.4197	5	3	5	1	3	4	3	2	0	3	2	3	3	0
21.9771	21.4652	21.7975	21.4954	21.7536	22.2785	22.166	22.0817	22.2072	21.3196	20.7485	21.7802	20.7931	21.3838	21.4584	22.0127	21.1192	21.4985	21.2516	20.1674	19.8124	19.6534	19.3201	19.5836	20.1946	20.6364	19.666	19.4009	19.3653	19.2916	19.3786	19.5762	19.3769	19.5748	18.6944	19.2112	1	1	3	2	1	2	1	3	2	2	2	1	0	2
19.0077	18.8051	18.8157	NaN	17.9984	18.4273	18.2141	18.1514	NaN	NaN	NaN	NaN	18.2606	18.0256	NaN	18.7819	NaN	NaN	22.5756	21.17	20.6624	20.3623	21.9631	21.4266	22.0413	24.1208	24.1736	20.5069	21.9773	20.435	20.5939	20.786	20.4662	21.6184	19.9625	20.3761	0	0	0	0	0	0	0	0	0	0	0	0	0	0
24.5234	25.5481	25.0846	24.6986	25.4846	24.7899	24.8273	26.2882	25.7286	26.1288	27.0447	24.4997	24.8431	25.23	25.3944	26.858	26.5785	28.0732	21.7485	21.5524	21.6	22.0274	22.3697	NaN	25.0533	25.2972	25.3427	21.6821	22.391	21.8397	21.2869	22.4079	21.5796	22.1814	22.3519	22.5064	1	2	2	0	3	1	2	2	2	1	4	2	1	2
19.7948	19.8969	20.2094	19.5752	19.305	18.5899	19.6646	19.9001	NaN	19.0807	19.8604	19.959	19.8101	19.5968	19.6294	NaN	NaN	NaN	19.5025	20.3264	20.8273	19.7022	19.9942	20.3422	20.2057	20.1224	20.0846	20.3906	19.8466	20.3419	19.8864	20.1078	19.8711	20.9986	20.1032	20.2426	0	0	0	0	0	0	0	0	0	0	0	0	0	0
20.6087	20.6756	21.1749	21.6969	21.6818	21.8978	20.9856	21.0166	21.6853	21.7645	20.2216	21.3926	20.6712	21.4432	21.4231	22.2579	21.5624	21.6602	21.5812	21.5858	22.0841	22.2175	21.8614	21.6281	24.0161	24.1734	24.5566	22.6655	21.8286	21.7008	21.5033	22.1228	21.5571	22.4565	22.9395	22.5032	0	0	0	0	0	0	0	0	0	0	0	0	0	0
NaN	NaN	NaN	NaN	NaN	NaN	NaN	NaN	NaN	NaN	NaN	NaN	NaN	NaN	NaN	NaN	NaN	NaN	19.1352	18.8222	20.8738	19.0757	19.3807	19.6829	NaN	18.8526	19.8157	18.6936	18.7329	19.0303	19.3111	19.2843	19.08	19.5	19.4199	19.237	0	0	0	0	0	0	0	0	0	0	0	0	0	0
21.848	21.9736	23.7776	23.7779	24.4531	23.8425	24.4013	23.162	23.9094	24.1672	23.3894	22.733	22.6216	23.6576	23.0986	21.7494	21.0645	21.7407	20.3851	20.6933	21.0276	21.5543	21.4327	21.0546	21.2755	20.8753	21.383	20.8844	22.0802	22.4803	21.5673	20.9944	23.4401	21.3469	21.9823	21.7927	0	0	2	2	3	2	2	1	2	2	2	0	0	2
26.1632	26.1171	25.6375	26.3202	26.2234	26.3115	25.7924	26.7388	25.6973	26.5009	26.3288	26.5345	26.0322	26.2607	26.4899	26.3197	26.4312	26.4578	23.966	24.3056	23.5973	24.3318	24.0566	24.2244	24.9778	25.0056	25.0411	24.0782	24.1777	23.636	23.0903	23.7821	23.4095	24.0218	23.9721	23.8854	6	6	5	6	5	5	5	6	4	5	5	2	4	6
29.5489	29.8599	29.6474	29.2999	29.2682	29.3445	29.6714	29.8191	30.0002	29.8099	29.5113	29.6236	29.5912	29.6573	29.9078	29.7858	30.2303	30.2196	27.351	27.5088	27.0409	27.7266	27.8785	27.6826	28.3181	28.4342	28.289	27.5659	27.2356	27.2042	26.721	27.2297	27.0625	27.8971	27.8397	28.3245	18	20	13	10	11	11	13	16	17	14	15	14	14	18
20.1151	20.339	20.7165	20.049	19.3179	19.8889	19.9988	19.9774	19.3191	20.0552	19.9303	19.9645	19.9109	18.6153	20.5309	20.5141	21.4588	22.1484	20.8451	20.5559	20.3182	19.6736	19.78	20.6095	21.3052	21.1886	20.9859	19.9118	20.2551	20.3134	19.5059	19.7474	20.2053	19.8624	19.7937	20.2954	0	0	0	0	0	0	0	0	0	0	0	0	0	0
19.1672	NaN	19.3008	19.4392	19.1261	19.229	18.8977	NaN	NaN	19.054	19.1887	19.2131	NaN	19.2764	18.5963	19.4533	NaN	NaN	NaN	NaN	NaN	NaN	NaN	NaN	NaN	NaN	NaN	NaN	NaN	NaN	NaN	NaN	NaN	NaN	NaN	NaN	0	0	0	0	0	0	0	0	1	0	1	0	0	0
22.3728	21.5196	21.5433	21.5196	21.4426	21.2437	21.4305	21.498	21.2895	22.0427	21.4684	21.6133	20.9282	21.0768	21.2094	21.5584	21.265	NaN	NaN	19.6699	NaN	19.9917	19.7285	NaN	NaN	NaN	NaN	NaN	19.5731	NaN	NaN	NaN	NaN	19.7024	NaN	NaN	1	0	1	1	0	0	0	0	0	1	0	0	0	0
22.8185	23.1596	23.4239	21.5724	21.4952	21.4304	21.4578	21.5886	21.6807	21.5848	22.194	21.7143	21.3418	21.3483	21.9557	21.7284	22.0777	22.1867	20.6813	20.4178	20.6077	20.7005	20.6924	20.5741	21.18	21.1277	21.2103	20.8986	20.4772	20.4643	20.6778	20.3507	20.5846	20.5975	20.447	20.8983	1	1	1	0	0	0	0	0	0	0	2	1	0	0
23.1388	23.334	22.6739	22.0492	21.7763	21.7987	22.479	22.4463	21.8612	23.5751	23.7448	23.448	23.8248	23.0595	23.362	22.8058	21.9887	22.0901	23.3044	22.9375	22.3342	22.987	22.3753	23.0588	21.5381	21.254	20.5711	22.5014	22.6777	22.149	22.5101	22.7635	22.3619	22.8453	21.7061	21.4612	3	3	3	2	1	1	1	2	2	4	7	3	5	2
24.6973	24.9152	24.726	24.6884	24.7203	24.7926	24.5789	25.2223	24.5946	25.1469	24.811	24.9566	24.9794	25.127	25.2436	26.2478	26.5284	26.5936	25.7266	26.1223	25.7289	25.9153	25.7382	26.2996	26.3547	26.3218	26.7755	25.2916	25.1822	24.7428	24.8998	25.0552	24.4867	25.6207	25.8119	25.9137	5	4	2	1	5	5	3	4	2	1	4	5	5	2
NaN	NaN	NaN	NaN	NaN	NaN	NaN	NaN	NaN	NaN	NaN	NaN	NaN	NaN	NaN	18.3343	NaN	18.361	17.8056	NaN	18.5818	NaN	18.3473	NaN	NaN	18.8538	NaN	18.8427	18.9138	19.2936	20.3966	19.0528	19.1	19.3533	20.3156	19.7751	0	0	0	0	0	1	0	0	1	0	0	0	0	0
16.9083	16.836	NaN	NaN	NaN	NaN	16.262	16.7173	NaN	NaN	16.4688	NaN	NaN	16.4637	15.9677	20.4031	20.4273	20.6371	NaN	NaN	NaN	NaN	NaN	NaN	16.2662	15.7401	NaN	NaN	NaN	NaN	NaN	NaN	NaN	15.3709	15.2503	15.2867	0	0	0	0	0	0	0	0	0	0	0	0	0	0
24.8953	25.2155	25.2627	25.0903	25.0621	24.9479	25.1598	25.2021	25.4416	25.7487	25.731	25.5393	25.269	25.9735	25.4499	24.8994	25.0552	24.5715	29.5465	29.1531	29.3278	28.6985	28.4529	27.441	27.3325	27.4495	27.5537	28.6784	28.3924	28.1917	27.9682	28.0476	27.9563	27.6768	27.4212	27.5962	2	3	3	4	3	3	2	3	4	5	5	6	3	5
26.1824	25.9789	25.8169	26.1101	25.784	26.01	25.5225	25.5825	25.9838	26.3345	26.2256	25.9859	26.0345	26.0904	26.1453	26.0335	25.9251	25.995	26.2376	26.8932	26.9077	26.6822	27.0389	27.0267	27.7445	27.7589	28.1286	26.9165	27.0144	26.7434	27.1209	26.8609	26.6691	27.3465	27.3305	27.4501	4	3	4	5	7	6	3	2	4	6	4	3	4	4
24.614	24.7194	25.0423	24.767	24.3506	24.6943	24.5867	24.6351	24.9326	23.3531	23.7425	22.4688	23.732	22.8067	23.7496	24.096	24.0095	24.1178	21.0022	18.5711	20.7741	20.1345	19.095	NaN	21.8041	21.4726	20.4295	18.358	NaN	19.2556	21.4444	19.8408	19.8891	20.5069	20.0407	NaN	4	3	5	4	4	4	5	4	4	2	3	0	3	2
23.8192	NaN	22.3519	22.2561	22.72	22.7103	22.9109	23.2066	22.5327	22.8991	22.996	21.8136	24.5922	22.9881	22.1845	NaN	NaN	NaN	27.8935	27.7229	28.2769	27.4843	28.1324	26.8926	25.6599	26.1823	25.8093	26.7645	27.9998	27.4809	27.652	27.9056	27.5346	26.8988	27.61	27.2773	0	0	0	0	0	0	0	0	0	0	0	0	1	0
21.2641	21.9952	21.454	21.437	20.9894	21.2619	21.7612	21.4568	21.6982	20.5511	21.2856	21.1123	19.987	20.406	20.6131	21.094	20.3555	21.3732	20.5232	20.2471	20.4902	21.0015	20.1137	21.0216	NaN	20.5856	20.6643	20.1824	20.7089	20.3712	19.8492	19.9787	20.1179	20.6629	20.0148	20.3216	1	1	0	0	0	1	1	0	0	0	0	1	1	0
21.0154	21.6173	23.0486	23.1495	22.9065	23.0075	NaN	NaN	NaN	20.0207	20.0024	20.0748	19.9217	19.9462	19.0771	NaN	19.992	NaN	19.6178	19.8401	19.8525	19.5747	20.5912	20.0503	22.565	20.7755	22.0817	19.5471	19.5353	20.511	20.2853	20.0057	20.3928	19.7979	20.4316	20.4808	0	0	1	2	2	1	0	0	0	0	0	0	0	0
NaN	NaN	NaN	NaN	NaN	NaN	NaN	NaN	NaN	NaN	NaN	NaN	NaN	NaN	NaN	NaN	NaN	NaN	19.5773	NaN	NaN	19.307	19.7177	19.8728	NaN	20.5208	NaN	19.3789	19.633	19.4319	19.6217	19.3154	19.666	19.8562	19.0929	NaN	0	0	0	0	0	0	0	0	0	0	0	0	0	0
NaN	NaN	NaN	NaN	NaN	NaN	NaN	NaN	NaN	NaN	NaN	NaN	NaN	NaN	NaN	NaN	NaN	NaN	NaN	NaN	NaN	NaN	NaN	NaN	24.7082	25.9039	24.1847	NaN	NaN	NaN	NaN	NaN	NaN	NaN	NaN	22.9485	0	0	0	0	0	0	0	0	0	0	0	0	0	0
23.1168	23.464	23.3852	23.0873	22.9723	23.0791	23.286	23.4219	23.6147	25.9888	25.7546	26.3254	23.4502	23.4929	23.0623	22.9402	21.585	20.9959	24.6354	24.1013	24.9402	23.8748	24.0092	22.7737	22.9659	23.1027	21.219	24.3359	24.3017	24.1248	23.2584	23.6179	23.4259	23.5148	23.1422	23.1696	0	1	2	1	0	0	0	1	2	8	11	10	2	1
NaN	NaN	NaN	NaN	NaN	NaN	NaN	NaN	NaN	NaN	NaN	NaN	NaN	NaN	NaN	NaN	NaN	NaN	20.3201	NaN	NaN	NaN	NaN	20.2019	22.0122	21.8793	22.5695	NaN	NaN	NaN	NaN	NaN	NaN	21.7889	NaN	NaN	0	0	0	0	0	0	0	0	0	0	0	0	0	0
NaN	NaN	NaN	NaN	NaN	NaN	NaN	NaN	NaN	NaN	NaN	NaN	NaN	NaN	NaN	NaN	NaN	NaN	21.2915	20.5067	20.3756	19.9958	19.8612	19.754	NaN	NaN	NaN	20.4905	20.1094	20.1044	21.3391	20.9461	19.2683	20.2633	20.5609	19.8402	0	0	0	0	0	0	0	0	0	0	0	0	0	0
26.8528	27.1916	26.8919	26.7434	26.6174	26.6717	26.5719	26.4321	26.7429	26.125	26.3048	26.1241	26.2452	26.0729	26.3397	26.477	26.5325	26.4969	25.9214	25.7015	25.5721	25.8729	25.4925	26.128	26.0268	25.9141	25.7883	25.4003	25.2386	25.4378	25.2286	25.323	25.33	25.7269	25.1191	25.2132	17	15	11	11	12	8	13	8	11	7	10	7	10	11
29.3382	29.2791	29.3295	28.9686	29.074	29.1244	29.2425	28.9037	28.938	29.4863	29.4066	29.1589	29.8652	29.5779	29.4929	28.5851	28.5051	28.3102	28.5673	28.403	28.8397	28.5237	28.8842	28.7995	27.0366	27.3185	26.9089	28.9697	28.7262	28.7676	28.5467	28.2047	29.1048	28.0585	28.1263	27.895	46	42	40	34	40	39	45	34	27	43	41	40	56	44
19.1531	19.1939	19.1769	19.5327	19.0476	18.8765	19.4279	18.9926	20.0211	19.5408	19.0138	19.3294	19.6101	19.8037	20.1945	20.7124	20.3004	20.5537	22.4293	21.5399	20.4163	21.6739	20.9699	19.6427	24.3764	25.7579	24.8941	20.3094	20.8013	20.4465	20.7406	20.7524	20.745	22.7194	23.5664	23.716	0	0	0	0	0	0	0	0	0	0	0	0	0	0
NaN	NaN	NaN	NaN	NaN	NaN	NaN	NaN	NaN	NaN	NaN	NaN	NaN	NaN	NaN	NaN	NaN	NaN	22.1305	21.0368	21.359	22.4072	22.1683	21.3451	21.1174	21.5781	21.9682	22.1968	22.1046	22.1667	22.5714	22.3995	21.9102	22.1027	21.8691	22.1429	0	0	0	0	0	0	0	0	0	0	0	0	0	0
29.3804	28.9783	29.2803	29.0321	29.0549	28.8307	29.6272	28.7332	29.0102	28.7767	28.658	28.5409	29.2912	29.0007	28.7774	27.7732	28.0908	27.696	27.361	27.0013	27.6294	25.3926	25.0307	24.978	25.4516	25.4331	25.2639	25.2402	25.2047	24.6376	26.1393	26.0547	26.6303	24.7326	24.8734	24.6827	27	22	22	20	23	21	29	19	20	16	9	7	24	20
21.1431	19.4431	21.262	21.3005	NaN	18.4576	NaN	18.4779	NaN	NaN	NaN	NaN	NaN	NaN	NaN	NaN	NaN	NaN	27.8509	27.1532	28.6887	25.509	28.6088	26.9926	25.5241	25.3243	25.5475	26.2782	26.1428	27.5353	25.9204	25.1321	27.6259	25.2715	25.6308	26.096	0	0	0	0	0	0	0	0	0	0	0	0	0	0
NaN	NaN	NaN	NaN	NaN	NaN	NaN	NaN	NaN	NaN	NaN	NaN	NaN	NaN	NaN	NaN	NaN	NaN	NaN	18.2468	18.7763	19.0338	18.923	20.9136	NaN	20.1667	19.0947	18.8503	19.0208	19.3304	18.8086	18.638	18.8583	18.9161	19.2053	18.6772	0	0	0	0	0	0	0	0	0	0	0	0	0	0
21.8227	22.1047	22.069	21.3372	21.2556	21.473	20.5074	20.4228	21.1477	22.0332	21.862	21.8061	21.9419	21.2288	22.5666	22.6029	21.5044	22.5179	23.0533	23.1796	22.8518	23.2829	22.4094	23.6849	24.1121	24.1112	24.281	22.4066	22.1815	23.4511	22.8485	22.8643	22.7347	24.6445	24.7517	24.8701	1	1	2	0	0	0	0	0	0	0	0	0	0	0
21.8092	22.1263	21.7413	21.621	21.5385	21.5713	21.6617	21.1506	22.3661	21.4687	21.5983	21.5872	21.9335	21.1176	21.8298	22.3017	22.0066	22.0778	21.5212	20.6715	21.6226	21.7322	21.3194	21.094	23.9078	23.9453	23.1915	21.3034	21.936	21.6537	22.3006	22.2868	22.2233	21.8932	22.4045	21.9181	1	1	0	1	0	0	0	0	2	1	1	0	0	0
22.8667	23.7658	23.8858	22.0991	22.1193	21.9477	23.3689	23.4723	21.1001	23.4594	23.3749	21.3171	22.4166	22.838	22.7588	20.8464	21.3859	20.6797	18.4657	17.9374	19.9418	18.846	19.4047	21.4894	NaN	NaN	18.2953	18.7687	18.0438	18.2788	18.8496	18.5947	18.5369	18.542	18.3004	18.0156	3	4	5	1	1	2	2	4	0	1	2	0	3	2
26.4582	26.551	26.5625	26.6798	26.5027	26.3274	26.723	26.7755	26.3407	26.2226	26.2919	26.843	26.096	26.0636	26.6808	26.8545	26.8176	27.0999	26.4865	26.4557	25.9573	26.7383	26.1208	25.4728	26.8906	26.6887	26.6794	26.0825	26.3655	26.459	26.1538	26.7042	26.5925	26.1141	26.5109	26.3559	5	6	4	4	4	4	6	4	4	3	5	3	5	3
20.0514	19.6893	19.3467	19.3903	19.4715	19.1977	19.6492	19.8887	19.864	19.3981	20.1535	19.4587	20.7513	19.6924	20.4829	21.5237	21.642	20.6408	18.203	NaN	18.676	NaN	18.9947	19.8892	20.7254	20.2657	19.9296	18.5179	18.6995	18.7682	NaN	NaN	NaN	18.8428	19.6723	19.3953	0	2	0	0	0	0	0	0	0	0	0	0	1	0
20.766	21.68	21.28	20.8311	21.1335	20.9385	19.3063	18.6148	NaN	20.4186	20.1442	19.9306	20.3364	19.9809	19.5287	18.6767	20.2395	19.8381	26.9641	27.1738	26.1489	26.8688	26.5172	26.6266	24.952	24.9239	25.309	26.8986	27.2072	26.5395	27.6028	27.3746	25.7635	26.3132	26.4066	26.4186	1	1	1	1	1	1	0	1	0	1	1	0	1	1
NaN	19.731	NaN	20.1729	19.8089	20.1926	20.1281	20.3958	20.3464	20.2566	19.8113	19.5765	19.5966	20.0743	20.2409	18.913	19.3501	19.3386	20.0486	20.4603	20.3049	19.929	20.2445	19.5615	21.4799	21.6819	21.8844	19.8016	19.6755	19.8583	19.9187	20.0803	18.8236	19.7053	19.8142	20.5937	0	0	0	0	0	0	0	0	0	0	0	0	0	0
22.6011	22.4489	21.4857	20.6195	21.5938	20.5819	21.3709	20.7693	21.5747	21.5854	21.9396	21.5103	22.2145	21.0724	21.3636	20.9767	20.6113	20.5917	NaN	NaN	NaN	19.9148	NaN	NaN	18.8384	19.4826	NaN	NaN	NaN	NaN	19.1229	19.3103	NaN	19.6776	19.1767	19.5872	1	1	0	0	2	0	2	0	1	1	1	1	1	0
26.0529	26.1229	25.6396	26.4456	26.4211	26.5403	26.6091	27.7452	26.7594	26.8436	26.7229	26.6238	26.6931	26.4458	26.9093	28.1922	28.5298	28.5566	25.6545	26.1615	25.9251	25.9972	25.9865	26.2374	26.8427	26.6323	27.0231	25.4829	25.5029	25.2278	25.3717	25.4722	25.1966	25.8784	26.4359	26.2955	7	6	1	5	8	7	9	18	9	7	10	5	7	7
23.5509	23.529	23.3471	22.7252	22.5641	23.1601	22.9242	23.4275	22.6454	23.1372	23.4073	23.1593	23.1342	23.2295	23.7605	22.3801	24.3758	22.1133	21.4984	20.6391	21.5882	22.5799	21.2451	NaN	21.8231	22.808	22.6506	21.3938	21.3516	21.5003	21.1612	21.4576	20.893	22.1913	21.1774	21.8068	0	1	1	0	0	2	0	2	0	0	0	1	1	1
27.6031	27.6451	27.3884	27.0524	26.5683	26.5506	26.9778	26.8818	26.0527	26.977	27.2277	26.8478	27.447	26.8817	27.4387	26.868	26.7376	26.6335	28.959	28.1708	27.9742	28.1665	27.3491	28.0435	25.3776	25.1765	27.1714	28.2167	27.7263	28.2061	28.211	28.1715	28.5311	27.55	27.1226	27.5861	3	1	2	1	1	1	1	1	1	1	1	1	1	2
16.9994	NaN	NaN	NaN	NaN	NaN	NaN	NaN	NaN	NaN	NaN	NaN	NaN	NaN	NaN	NaN	NaN	NaN	26.6191	27.0673	26.0506	27.7252	27.0532	27.129	27.0034	27.1048	27.5997	27.6057	26.6154	26.5218	26.491	27.29	26.52	27.8358	27.4209	26.8697	0	0	0	0	0	0	0	0	0	0	0	0	0	0
24.913	24.122	22.8247	23.3487	23.4271	23.0986	23.9602	24.1266	23.1687	23.5349	24.1499	22.7696	23.0174	22.8884	23.3465	25.0168	24.8398	25.4673	22.6438	22.548	21.2754	22.3456	21.596	22.0891	23.2873	24.0692	23.848	22.0377	22.3351	22.3429	21.2863	21.0089	21.7458	22.7334	21.8957	22.0056	3	4	0	0	0	0	1	2	0	1	1	0	0	0
19.005	19.1442	19.0721	19.5547	19.865	19.6828	19.2066	19.5804	19.8952	19.3259	18.9833	18.9495	19.2113	19.2809	19.3619	19.8354	20.3629	20.1214	20.1699	20.4107	20.3693	20.6413	20.9626	19.78	22.2042	22.4567	22.1799	20.5018	20.5757	20.6049	19.8505	19.9552	19.9152	20.6871	20.712	20.769	0	0	1	1	1	0	0	1	1	0	0	0	0	1
NaN	19.2381	NaN	19.9762	20.3768	20.0339	20.1164	20.3974	19.335	20.3466	19.8267	21.1438	20.5622	19.9183	19.8876	19.4658	19.3374	19.6486	19.1282	18.9531	19.5384	20.5497	19.4682	20.9385	19.5681	19.0056	19.499	20.5999	20.1536	21.3672	20.3633	20.4245	20.3572	20.258	19.6865	20.0223	0	1	0	1	1	1	0	1	0	1	0	1	1	0
28.4591	28.3994	27.8316	28.0611	27.9259	28.0256	27.991	27.941	27.8258	28.1755	28.2868	28.1999	28.3023	28.5384	28.6357	28.8138	28.5999	28.8109	27.427	27.5693	27.109	27.5694	27.0339	27.0862	27.752	27.6505	27.6983	27.1623	27.1341	28.1318	27.4905	27.3363	27.5553	27.5958	27.177	27.5407	10	15	9	13	13	14	18	15	12	15	14	12	17	14
19.4789	19.886	19.1917	20.3167	19.9525	20.4774	19.7362	19.4774	20.1513	20.0625	20.234	20.1192	19.4852	20.2049	19.9656	19.2501	18.8655	19.4246	22.1068	21.0725	20.5607	22.395	21.9315	19.4297	23.6994	23.8224	23.4042	21.7317	21.6775	22.1108	21.2679	20.8109	22.1918	20.4474	21.7062	19.7518	0	0	0	0	0	0	0	0	0	0	0	0	0	0
26.0129	25.9992	26.0359	25.6141	25.814	25.6784	25.4337	26.641	26.1947	25.5907	26.4048	25.3371	25.7535	27.0634	26.7246	25.2135	25.135	25.79	29.5241	29.4731	28.9963	29.5158	29.4777	28.8993	28.8001	28.5632	28.5629	29.2414	29.4313	29.3433	30.5606	30.053	29.2617	29.2383	29.1782	28.7102	4	5	2	2	2	6	3	4	3	3	3	0	6	4
27.1005	27.297	27.4579	27.5516	27.6932	27.4654	27.5851	27.3486	27.3464	27.3023	27.2905	27.4158	27.2925	27.2939	27.2748	27.7767	28.0314	27.7293	29.3586	29.4124	28.3887	29.075	28.7607	28.4274	30.4668	30.6064	30.5772	28.9269	28.8062	28.6095	28.798	29.0343	28.623	29.3341	29.4251	29.3863	7	10	7	8	9	8	8	6	6	6	6	8	7	6
22.4888	22.6796	21.2499	21.1562	21.151	20.915	21.5236	21.4117	21.5279	22.4097	21.522	21.8406	21.1652	21.2532	21.3925	22.2303	22.047	23.4531	19.5321	19.7199	19.5133	19.9981	NaN	20.9747	21.9025	21.2817	21.8765	19.6752	19.6467	19.5481	20.6645	21.1395	19.7896	21.0286	20.5681	20.259	1	1	0	0	1	1	1	1	0	1	1	1	0	0
21.7104	21.2301	22.1575	21.92	21.1925	20.5508	20.9151	19.2651	23.5644	21.6275	21.7576	21.9955	21.237	22.7877	22.1637	22.2797	21.5825	22.774	24.6438	24.7113	26.0673	25.3344	25.7476	25.9939	22.6076	23.5177	24.0846	24.7463	25.5624	25.7958	25.9264	25.9024	25.2456	25.8961	25.5805	25.1563	0	0	0	1	0	0	0	0	1	1	0	0	0	1
28.4026	28.3858	28.7401	28.9929	28.7468	28.6426	28.5239	28.6739	28.5001	28.2743	28.3384	28.7179	28.5769	28.6864	28.3862	28.6913	28.7047	28.2707	27.7892	27.387	27.9538	27.6079	28.2089	28.8157	26.9951	27.1912	26.2788	28.2368	27.612	28.2838	27.5753	27.1766	28.0511	27.5304	27.4594	27.1542	16	17	14	20	14	13	9	13	9	10	11	17	8	13
19.6577	19.6807	19.2459	19.6015	19.7306	20.011	19.9069	20.1163	20.6423	19.8268	20.056	20.7144	20.235	19.7643	20.4229	19.5049	19.4893	19.5168	NaN	NaN	NaN	NaN	19.28	NaN	19.8862	20.1529	20.0551	NaN	NaN	NaN	NaN	NaN	18.8785	NaN	19.1096	NaN	0	0	0	0	0	0	0	0	1	0	0	1	0	0
NaN	NaN	18.8606	NaN	18.4479	18.9071	NaN	NaN	NaN	NaN	NaN	NaN	NaN	NaN	NaN	18.8449	20.4763	20.4741	NaN	NaN	NaN	NaN	NaN	NaN	NaN	NaN	NaN	NaN	NaN	NaN	NaN	NaN	NaN	NaN	NaN	NaN	0	0	0	0	0	0	0	0	0	0	0	0	0	0
25.8859	25.6546	26.4039	25.5514	25.9375	25.8977	25.6348	26.4544	26.9508	25.6887	26.4624	26.009	25.1786	26.2945	25.671	25.3233	25.198	25.4002	27.0301	26.7233	27.1697	26.4288	26.7171	26.9995	26.7901	26.8694	26.384	26.4665	26.5799	26.6741	26.6214	26.8369	26.0449	26.4582	26.382	26.11	10	8	12	5	8	7	7	13	11	8	11	6	6	14
18.3125	18.4738	NaN	17.8334	NaN	18.1987	NaN	17.9496	NaN	18.4021	NaN	NaN	18.3879	NaN	NaN	19.3308	19.0613	17.2455	NaN	17.7863	NaN	18.4525	NaN	NaN	21.5915	20.9106	20.6493	21.9005	21.6035	20.4389	NaN	19.8571	NaN	20.1186	NaN	NaN	0	0	0	0	0	0	0	0	0	0	0	0	0	0
21.6808	21.2541	21.6882	20.7099	20.7229	20.9273	20.7991	22.2506	22.0838	21.1141	21.8053	20.8164	21.0384	21.5943	21.0461	NaN	NaN	NaN	20.1779	21.1824	21.3398	20.923	21.2464	20.3643	20.1784	20.0136	NaN	20.8529	21.0236	20.9383	NaN	21.0533	NaN	20.6853	NaN	NaN	1	0	0	0	0	0	0	1	0	0	0	0	0	0
19.3018	19.2843	19.8957	20.7353	21.2847	19.6129	19.8196	19.955	19.6423	19.7855	19.7654	19.8816	19.4095	NaN	19.7886	NaN	NaN	NaN	18.4446	18.0889	18.1792	18.7958	18.0723	NaN	NaN	NaN	NaN	18.459	18.2052	NaN	18.2678	18.0421	NaN	18.6141	18.3575	18.0456	0	0	0	1	1	0	0	0	0	0	0	0	0	0
30.0822	30.0287	29.5748	29.7283	29.8029	29.843	29.3884	29.1895	29.2312	29.966	30.0021	30.2366	30.3913	30.3279	30.6876	30.8646	31.0065	30.9468	28.5134	28.8538	28.1894	29.3	29.3005	29.578	30.2339	30.0326	30.3361	28.7236	28.7208	28.6808	28.8753	28.8161	28.8677	30.1538	30.4716	30.4908	80	73	45	48	58	52	39	42	32	56	66	52	79	74
29.0215	29.0589	29.0534	29.0123	28.9515	29.1361	28.6417	28.8573	29.0016	28.687	28.5147	28.929	28.7658	28.7526	28.9477	29.1819	29.2129	29.3253	30.6298	31.1893	30.4235	30.4586	30.4532	30.7079	31.7828	31.6264	32.0157	30.145	30.1408	29.9745	30.2582	30.1328	30.0502	30.3784	31.0114	31.0109	17	14	16	11	14	16	10	15	12	11	11	11	14	11
NaN	NaN	NaN	NaN	NaN	NaN	NaN	NaN	NaN	NaN	NaN	NaN	NaN	NaN	NaN	20.817	20.5435	20.0668	NaN	NaN	NaN	NaN	NaN	NaN	19.3392	NaN	NaN	NaN	NaN	NaN	NaN	NaN	NaN	NaN	NaN	NaN	0	0	0	0	0	0	0	0	0	0	0	0	0	0
18.9614	18.8708	18.5514	19.45	19.2524	18.8154	19.8854	19.389	19.7346	19.1379	19.1545	19.1963	20.4588	19.1226	20.8902	18.5612	18.6824	18.2086	22.2276	21.4301	22.2892	22.6976	21.8412	19.0303	20.7606	20.5409	20.3556	21.8068	22.3499	21.9272	22.6866	21.7322	23.0497	21.8961	21.7923	22.0508	0	0	0	0	0	0	0	0	0	0	0	0	1	0
19.5116	18.4001	18.0512	NaN	17.8537	17.5905	17.4451	18.5605	17.8668	18.1042	17.9863	18.0144	18.1674	18.0039	17.9545	NaN	NaN	NaN	NaN	NaN	NaN	NaN	NaN	NaN	NaN	NaN	NaN	NaN	NaN	NaN	NaN	NaN	NaN	NaN	NaN	NaN	1	0	0	0	0	0	0	1	0	0	0	0	0	0
28.4622	28.5676	28.3166	28.0283	28.1501	28.5048	28.4441	28.7706	28.4496	28.4937	28.5071	27.772	28.4438	28.5448	28.7752	28.7596	28.8228	28.5863	30.0376	30.1142	29.268	29.9215	29.1021	29.0677	28.5067	29.0112	29.2485	29.6128	29.6982	29.7049	29.2666	29.8722	29.8783	29.4406	29.0275	29.2379	8	8	8	10	9	9	7	9	7	8	10	6	10	10
22.3087	21.7761	22.2962	22.1363	21.9917	22.0634	22.032	22.0119	22.4871	21.7392	22.6958	22.2316	22.0668	23.8029	21.4066	20.2118	19.8559	20.4071	23.9864	23.9047	24.9626	24.1013	24.6038	25.1696	23.9231	23.2985	22.8885	24.249	24.2864	24.3269	23.9357	24.1568	23.9801	23.6578	23.8885	23.8589	1	0	1	0	0	0	0	0	0	0	0	0	0	2
23.3533	24.0984	24.3068	24.2187	24.1626	24.2205	24.003	24.3665	23.7328	24.1474	23.8463	23.6061	24.1486	24.0141	24.1944	24.1835	24.0081	24.1642	26.707	25.6893	25.4621	26.3647	25.9306	25.0983	24.2675	24.3707	24.6312	26.0908	25.7818	25.8703	25.34	25.7005	26.226	25.277	24.917	24.7404	2	3	2	2	3	2	2	3	2	3	2	1	3	1
22.0072	21.5944	21.7304	21.4884	21.4473	21.4812	21.7943	21.5653	21.685	21.6463	21.4603	21.802	21.3404	21.7477	21.441	21.6737	21.9322	21.4669	22.6054	21.1701	20.4611	21.288	20.5756	20.7157	21.6521	19.9451	21.6903	20.4715	20.5931	20.6213	19.8966	20.3297	20.4115	20.5348	20.1986	20.1809	1	0	0	0	0	0	0	1	1	0	0	0	0	0
19.8396	19.5418	20.6373	21.9182	20.7667	20.0399	20.3416	20.5152	20.4026	20.8032	20.495	21.3055	22.0287	20.7445	20.9387	21.0784	20.2988	20.6747	20.5137	20.5436	20.2625	20.5624	20.2269	20.5908	20.1365	20.8474	22.216	NaN	20.2417	20.1557	NaN	19.8313	NaN	19.9244	19.8052	NaN	1	1	0	1	0	0	0	0	0	0	0	0	1	0
NaN	NaN	NaN	NaN	NaN	NaN	NaN	NaN	NaN	NaN	NaN	NaN	NaN	NaN	NaN	18.0911	18.027	17.8837	NaN	NaN	NaN	NaN	NaN	NaN	19.4654	18.4168	18.0229	NaN	NaN	NaN	NaN	NaN	NaN	NaN	NaN	NaN	0	0	0	0	0	0	0	0	0	0	0	0	0	0
NaN	NaN	NaN	19.1836	NaN	NaN	NaN	NaN	NaN	20.1871	19.914	NaN	NaN	NaN	NaN	20.2283	20.2282	19.3098	NaN	NaN	NaN	NaN	NaN	NaN	NaN	NaN	NaN	NaN	NaN	NaN	NaN	NaN	NaN	NaN	NaN	NaN	0	0	0	1	0	0	0	0	0	1	1	0	0	0
25.4454	25.7623	25.3829	25.6441	25.7424	26.0228	25.8262	25.9967	25.6355	25.5029	25.7066	25.736	25.9481	25.3297	25.9599	26.5699	26.3593	26.6303	26.0043	26.247	25.7427	25.9192	25.9231	25.997	27.2677	27.0895	27.3142	25.81	25.9966	26.0069	26.3908	26.2267	25.5819	26.5075	26.547	26.712	3	4	3	6	6	6	2	6	4	5	7	5	4	4
22.6469	22.6147	22.6595	22.2724	22.4762	22.097	22.9285	23.013	22.3921	22.4849	22.8756	22.7679	22.6676	22.1581	22.1064	21.3966	21.7662	21.7534	23.2772	23.5051	23.7195	23.7902	23.1105	23.9935	24.6664	24.6408	24.2801	22.9504	23.089	23.1558	23.0975	23.605	23.1579	23.0301	23.6779	23.2617	0	1	1	0	0	1	2	1	1	1	4	1	0	1
20.2748	20.2573	19.5531	19.3508	19.5143	19.6988	19.584	20.0201	19.9488	19.2357	19.8908	19.8774	18.006	19.3598	19.1602	20.7503	22.496	22.6592	19.7985	19.9133	19.3009	19.3876	19.2468	19.7566	21.7536	20.9219	20.4106	19.615	20.1489	19.3638	20.2385	20.1107	19.9632	21.0838	20.6163	21.3384	0	0	0	0	0	0	0	0	0	0	0	0	0	0
20.9935	19.5109	19.8527	19.5419	20.4823	19.7878	19.8312	19.7688	20.442	19.8001	19.0072	23.3594	20.135	19.8153	19.487	19.8969	20.0564	20.3298	24.1965	20.9667	20.0908	20.0685	NaN	NaN	22.1788	21.1677	NaN	NaN	NaN	NaN	NaN	19.2505	NaN	19.3301	NaN	NaN	1	0	0	0	0	0	0	0	0	0	0	1	0	0
24.4858	25.0543	24.9058	24.5953	24.9351	24.5839	25.2059	25.0456	24.7649	25.222	25.2108	24.792	24.5575	25.0292	24.3135	24.5252	24.3179	24.3522	28.3523	27.7888	27.4338	27.003	26.9312	26.3347	26.5604	26.894	26.7483	27.3153	26.9162	26.7078	26.6249	26.9157	26.8152	26.541	26.4471	26.5172	1	2	1	1	2	2	1	1	0	2	1	0	1	1
NaN	NaN	NaN	NaN	NaN	NaN	NaN	NaN	NaN	NaN	NaN	NaN	NaN	NaN	NaN	NaN	NaN	NaN	20.6096	20.3949	18.3472	18.834	18.4261	18.0565	NaN	17.6911	NaN	18.5541	18.1008	17.8133	NaN	18.0686	17.94	17.79	17.1082	NaN	0	0	0	0	0	0	0	0	0	0	0	0	0	0
22.1697	21.7229	21.4369	21.3189	21.7817	21.1429	20.8793	21.7863	21.447	21.8125	21.961	21.7553	21.9976	21.6011	21.6725	21.5757	21.7117	22.0887	24.1606	23.4588	23.3243	23.4411	23.4125	24.0976	21.3288	21.2576	21.2346	22.581	22.2402	22.6921	23.7812	22.5921	22.8649	22.3026	22.1192	23.3123	0	0	0	0	0	0	0	0	0	0	0	0	0	0
NaN	20.078	20.4065	19.7524	19.6202	NaN	NaN	NaN	20.1916	NaN	20.5333	20.5246	NaN	20.685	19.985	22.1361	21.7352	21.546	NaN	NaN	NaN	NaN	NaN	NaN	21.4108	20.8936	20.8559	NaN	NaN	NaN	NaN	NaN	NaN	NaN	NaN	NaN	0	0	0	0	0	0	0	0	0	0	0	0	0	0
NaN	NaN	NaN	19.0679	19.5742	19.7899	19.2833	17.6364	19.5833	20.1025	18.9457	19.3315	20.2097	19.7244	20.1894	NaN	NaN	NaN	NaN	NaN	NaN	NaN	NaN	NaN	NaN	NaN	NaN	16.2159	NaN	16.4115	NaN	16.5676	17.8013	NaN	16.7863	16.4779	0	0	0	0	1	1	1	0	2	1	0	0	1	0
21.3334	21.3643	21.7633	21.4384	21.7909	21.6316	21.3809	22.3421	22.0688	21.3332	21.9565	21.0835	21.7021	22.2005	22.3976	NaN	NaN	NaN	22.2694	22.3732	23.7479	22.504	22.4155	20.7946	NaN	NaN	NaN	23.0687	22.4947	22.5509	NaN	22.8268	22.8052	22.5556	NaN	NaN	0	0	0	0	0	0	0	1	0	0	0	0	0	0
26.3873	25.333	26.3667	27.7559	28.5884	28.0825	26.1656	25.0563	27.5957	28.7751	27.1261	26.7247	28.3793	28.1892	27.969	26.4487	26.8154	24.8061	19.8595	20.605	20.6559	21.4858	22.4684	19.3754	23.8218	22.3649	21.9096	21.4816	22.7313	21.4168	22.7424	21.9986	23.6659	25.6953	25.4359	25.8314	7	5	5	13	15	13	7	4	6	9	7	8	14	9
NaN	NaN	NaN	NaN	NaN	NaN	NaN	NaN	NaN	NaN	NaN	NaN	NaN	NaN	NaN	NaN	NaN	NaN	19.6639	19.6091	20.8	19.229	19.1158	19.6103	NaN	NaN	NaN	18.8893	18.5509	18.2254	NaN	NaN	18.4721	18.6734	18.694	18.695	0	0	0	0	0	0	0	0	0	0	0	0	0	0
24.3261	24.3817	24.171	24.1859	24.0089	24.1646	23.9098	23.9398	23.755	24.2397	24.0829	24.0455	24.3685	23.9933	24.0294	23.8994	24.0549	24.0713	23.557	23.843	23.3537	23.9286	23.9974	24.3213	24.6582	24.3499	24.3715	23.4833	23.483	23.4228	23.4974	23.389	23.1631	23.9411	24.0863	24.3476	6	6	3	3	3	2	3	3	2	5	4	3	2	4
NaN	17.4812	NaN	NaN	NaN	NaN	NaN	NaN	NaN	NaN	NaN	NaN	NaN	NaN	17.0672	NaN	NaN	NaN	NaN	NaN	16.9661	NaN	17.3891	NaN	NaN	NaN	NaN	NaN	NaN	17.2541	17.1393	17.1068	17.1516	20.0212	20.4768	20.8905	0	0	0	0	0	0	0	0	0	0	0	0	0	0
20.6445	20.6434	19.0837	18.2165	18.8155	18.7565	19.9913	18.6503	18.8053	20.7773	20.5723	19.9141	20.8261	20.7692	19.4939	20.161	21.339	19.9944	22.9849	22.5877	22.9219	21.8868	21.6233	21.418	17.9182	19.5024	19.2929	22.1604	21.2792	22.4698	20.4605	20.6606	22.1355	21.1992	19.168	19.3264	1	1	0	0	0	0	0	0	0	1	2	1	1	2
17.6646	18.0171	17.8036	NaN	17.8674	17.7938	17.7831	NaN	NaN	18.0744	17.8384	NaN	17.6717	17.7682	NaN	17.6906	17.543	18.0156	NaN	NaN	NaN	NaN	17.5021	NaN	17.6415	17.8627	17.7343	NaN	NaN	NaN	17.5158	NaN	NaN	18.1545	18.2768	19.2896	0	0	0	0	0	0	0	0	0	0	0	0	0	0
19.673	20.7551	20.1724	19.9006	19.7766	20.4708	20.1406	19.6337	19.1093	19.9163	NaN	20.4868	19.8094	19.5382	19.8583	20.1555	NaN	19.8109	18.2764	NaN	NaN	18.9378	18.6867	NaN	20.8611	21.4011	20.7678	NaN	18.7304	NaN	18.4457	18.4123	NaN	18.679	19.0676	18.9937	0	1	0	0	0	0	0	0	0	0	0	0	0	0
NaN	19.0609	NaN	NaN	NaN	NaN	NaN	NaN	NaN	NaN	NaN	NaN	NaN	NaN	NaN	NaN	NaN	NaN	18.8723	18.8687	20.3828	18.8265	19.1137	19.862	NaN	18.4996	18.644	18.7271	18.9065	19.149	19.0021	19.6209	19.234	18.8389	18.8493	18.4165	0	0	0	0	0	0	0	0	0	0	0	0	0	0
26.0179	26.5084	27.0011	27.2711	27.3022	27.282	27.4301	27.6381	27.9304	26.9549	27.122	27.1289	27.0563	27.325	27.2717	27.58	27.3607	27.3199	28.2159	28.3941	29.7072	29.2151	29.4436	28.886	28.2271	28.2343	27.6858	29.9521	29.8343	29.883	30.0725	29.8475	30.1469	30.1104	29.8727	29.9902	5	8	14	14	13	11	14	15	14	7	10	7	8	10
22.1423	21.8687	22.0076	21.2911	21.7337	21.3393	22.3265	21.6171	21.9106	21.4715	22.4926	22.147	21.8748	22.1201	21.7031	21.6162	21.0433	21.819	23.3155	22.8012	23.4039	22.7737	22.6522	21.7192	23.0325	23.1407	23.6196	22.9048	22.2576	22.8454	22.1473	22.4748	22.7486	22.308	22.0284	22.2875	2	1	0	0	0	0	1	0	0	0	2	0	1	1
21.8183	21.2225	22.5788	20.8947	20.3295	21.1613	21.2574	20.6568	21.1796	21.9908	21.2111	21.6697	21.5638	21.1214	21.2287	20.535	20.279	20.2893	20.2196	19.7162	20.4839	20.5844	21.2352	20.0503	20.5621	20.8009	20.3804	20.1977	20.4454	20.7818	20.3633	20.8612	20.4119	22.7941	21.2397	22.7841	1	0	2	0	0	1	0	0	1	1	0	1	1	1
22.8972	22.1931	22.0376	22.6571	22.7668	22.5493	22.4157	22.0299	21.5902	21.908	21.4005	21.6219	21.4824	21.298	21.2809	20.8753	21.0793	20.7271	NaN	19.6117	NaN	NaN	NaN	NaN	NaN	18.3876	NaN	NaN	NaN	NaN	NaN	NaN	NaN	NaN	20.3966	NaN	1	4	0	1	1	1	0	0	0	0	0	0	0	0
20.9842	21.9151	21.1033	20.5506	21.2799	21.7584	21.3929	21.4074	20.3429	NaN	NaN	21.1973	20.9232	NaN	20.3416	20.9264	21.5949	21.8912	20.7157	21.1595	20.9211	20.2662	20.3132	21.0596	21.5559	20.9776	20.7197	20.6861	20.4269	20.1065	20.1628	20.9387	20.3644	20.8938	20.8161	20.746	0	1	0	1	1	1	0	1	0	0	0	0	0	0
NaN	NaN	NaN	19.323	20.4725	19.956	19.7929	19.6749	20.4057	19.7462	20.4954	20.0459	19.2641	19.1922	NaN	19.2079	NaN	19.2857	NaN	NaN	NaN	NaN	NaN	NaN	NaN	NaN	NaN	NaN	NaN	NaN	NaN	NaN	NaN	NaN	NaN	NaN	0	0	0	1	1	1	0	0	0	0	0	0	0	0
NaN	NaN	NaN	NaN	NaN	NaN	NaN	NaN	NaN	NaN	NaN	NaN	NaN	18.512	19.2965	20.4296	20.1562	20.9854	NaN	NaN	17.8038	17.2414	NaN	NaN	18.4631	18.2043	18.5579	NaN	17.7461	NaN	NaN	NaN	17.6425	17.6906	NaN	NaN	1	0	0	0	0	0	0	0	0	0	0	0	0	0
NaN	NaN	NaN	NaN	NaN	NaN	NaN	NaN	NaN	NaN	NaN	NaN	NaN	NaN	NaN	NaN	NaN	NaN	NaN	NaN	NaN	NaN	NaN	NaN	20.6789	19.835	19.4543	NaN	NaN	NaN	NaN	NaN	NaN	NaN	NaN	NaN	0	0	0	0	0	0	0	0	0	0	0	0	0	0
19.2333	NaN	19.3078	NaN	NaN	NaN	19.77	19.6947	NaN	19.9013	19.5722	NaN	19.6221	NaN	19.5979	NaN	19.9941	NaN	20.0313	19.8825	20.0735	19.6217	20.4606	20.5726	19.8203	20.2077	20.3523	21.3015	20.6605	21.5999	19.6948	19.6603	20.2961	19.8087	19.9442	19.8096	0	0	0	0	0	0	0	0	0	0	0	0	0	0
24.6477	24.1768	24.7366	23.8034	23.963	24.082	24.2277	23.5097	23.4113	23.5218	23.6208	23.9724	24.2273	23.9264	24.2763	24.0505	24.3363	24.2373	22.8063	23.1476	23.003	23.4209	23.049	23.8698	24.8746	24.7428	24.8284	22.6285	22.9018	22.7321	23.0144	23.2365	22.7037	23.625	23.4964	23.7072	1	1	1	2	1	2	2	0	0	1	1	2	2	3
20.8092	21.4762	19.0452	19.7125	20.8709	20.7901	21.2899	21.4731	19.7925	21.0181	20.9106	20.0051	21.0952	22.7147	21.7645	20.2992	21.5807	20.893	26.4187	25.968	25.8392	26.8181	26.5386	26.7817	23.6529	23.7423	23.2621	26.6889	26.3477	26.5657	26.0896	25.7283	26.0579	25.6999	25.4598	25.1688	0	0	0	0	0	0	0	1	0	0	0	0	0	1
NaN	NaN	NaN	NaN	NaN	NaN	NaN	NaN	NaN	NaN	NaN	NaN	NaN	NaN	NaN	NaN	NaN	NaN	21.6958	22.5169	22.0056	22.4844	22.7221	22.4503	24.0224	24.0508	23.8213	22.3644	22.5863	21.6094	23.4814	23.7012	21.8413	22.1302	22.4682	22.3487	0	0	0	0	0	0	0	0	0	0	0	0	0	0
NaN	NaN	NaN	NaN	NaN	NaN	NaN	NaN	24.808	24.6947	26.4612	26.731	23.6804	24.1619	23.2548	20.0216	NaN	NaN	NaN	NaN	NaN	21.4321	NaN	NaN	NaN	NaN	NaN	21.2684	NaN	21.7064	21.0875	21.2835	21.5221	21.2704	21.6751	21.508	0	0	0	0	0	0	0	0	4	4	6	7	4	3
27.7908	27.402	26.7585	26.7497	26.9723	27.0663	27.982	26.5134	26.5626	26.9333	26.9179	26.5226	27.9283	26.5744	27.7598	26.0411	25.742	25.9757	28.9825	28.86	29.1163	28.8659	28.916	28.5296	27.5068	27.2857	27.1642	29.1819	28.6893	29.0001	28.557	28.3035	29.1298	28.1414	28.0051	27.892	12	10	4	6	9	7	10	5	2	8	4	2	10	2
25.996	26.0421	25.8269	27.6289	27.7218	27.8597	28.2852	27.364	27.4109	27.7542	27.7288	27.5956	28.1849	27.4514	28.0582	26.0922	25.993	26.1463	28.5087	28.1381	28.5266	28.5047	28.65	28.7056	27.2359	27.5948	27.3537	28.5586	28.2556	28.2359	27.6986	27.4074	28.1441	27.3886	27.6277	27.3746	6	7	2	20	17	22	22	12	15	23	19	19	24	17
24.0204	23.7342	23.7089	22.6841	23.6525	22.8786	24.6994	23.9109	23.3098	23.0257	22.9339	23.5947	23.8932	23.9271	24.1768	22.9672	22.8357	22.608	25.5379	25.0912	25.5803	25.1532	24.9063	25.3364	23.043	23.36	22.8559	25.0569	24.4121	24.6582	23.7651	24.0851	24.5349	24.0879	23.848	23.8439	3	0	2	0	1	0	3	2	0	0	1	1	1	2
NaN	NaN	NaN	NaN	NaN	NaN	NaN	NaN	NaN	NaN	NaN	NaN	NaN	NaN	NaN	NaN	NaN	NaN	20.8858	22.3695	24.1164	20.8576	21.3187	20.0861	21.1158	20.3456	22.1728	22.2344	21.6431	21.8773	23.1182	21.4815	21.5693	21.7253	22.8945	20.4725	0	0	0	0	0	0	0	0	0	0	0	0	0	0
NaN	NaN	NaN	NaN	NaN	NaN	NaN	NaN	NaN	NaN	NaN	NaN	NaN	NaN	NaN	NaN	NaN	NaN	20.1752	NaN	NaN	NaN	NaN	NaN	19.4923	18.8651	19.2917	NaN	NaN	18.6442	18.3263	NaN	NaN	NaN	NaN	NaN	0	0	0	0	0	0	0	0	0	0	0	0	0	0
30.0076	29.9712	29.5638	30.059	29.9187	30.0375	30.6288	31.2592	30.4922	29.9854	30.0137	29.9979	30.0289	29.4074	29.632	31.4526	31.3487	31.1959	23.9694	23.4399	24.0265	24.3797	24.5789	25.1515	27.8434	27.6011	28.3177	24.8951	24.6584	24.1878	24.613	24.7417	24.0796	24.7658	24.5151	24.9499	18	17	13	19	16	21	19	26	21	15	14	21	18	17
26.8591	27.1661	27.0528	27.3313	27.1212	27.4317	26.5581	27.1943	26.7024	27.1611	27.065	27.0057	26.9074	27.1781	27.038	26.4384	26.5279	26.4628	26.5254	26.8491	27.1294	26.9175	27.1748	26.7446	26.7347	26.5641	26.6678	27.1858	27.19	27.267	27.1555	27.3765	27.0395	27.1821	26.8832	26.8113	18	21	15	18	17	17	9	13	10	13	18	13	15	14
NaN	17.0601	NaN	NaN	NaN	NaN	NaN	NaN	NaN	NaN	NaN	NaN	NaN	NaN	NaN	NaN	NaN	NaN	20.1164	24.2282	25.4657	25.6311	23.3333	28.0863	22.9735	21.4251	21.05	25.7296	23.4988	24.9222	21.8773	24.0167	21.3891	20.5479	20.5359	20.7265	0	0	0	0	0	0	0	0	0	0	0	0	0	0
NaN	NaN	NaN	NaN	NaN	NaN	NaN	NaN	NaN	NaN	NaN	NaN	NaN	NaN	NaN	NaN	NaN	NaN	NaN	NaN	17.8969	17.5618	17.4049	NaN	NaN	NaN	NaN	20.9884	18.7995	18.9239	NaN	NaN	NaN	NaN	NaN	17.3039	0	0	0	0	0	0	0	0	0	0	0	0	0	0
NaN	NaN	NaN	18.0635	17.913	18.2562	17.8832	18.325	18.0108	18.421	18.2837	18.1283	18.4889	19.9745	18.6643	NaN	NaN	NaN	NaN	17.1929	NaN	16.9233	NaN	NaN	17.6651	17.8465	17.6595	NaN	NaN	NaN	NaN	NaN	NaN	17.4285	NaN	17.3271	0	0	0	0	0	0	0	0	0	0	0	0	0	1
NaN	NaN	NaN	NaN	NaN	NaN	NaN	NaN	NaN	NaN	NaN	NaN	NaN	NaN	NaN	NaN	NaN	NaN	NaN	NaN	NaN	NaN	NaN	NaN	22.6221	22.7746	22.4819	NaN	NaN	NaN	NaN	NaN	NaN	NaN	NaN	NaN	0	0	0	0	0	0	0	0	0	0	0	0	0	0
18.7077	NaN	NaN	NaN	18.2702	17.5529	NaN	NaN	NaN	NaN	16.7072	19.0113	NaN	NaN	NaN	20.7894	18.5852	16.8334	26.7172	27.7518	26.4019	27.0724	27.2169	24.5246	27.1526	27.2219	27.8649	26.9348	27.309	26.2348	28.2168	27.4713	27.0097	26.536	27.6442	27.2562	0	0	0	0	0	0	0	0	0	0	0	0	0	0
24.9258	24.5185	24.1095	25.5735	25.3715	25.5566	25.1913	25.2789	25.5266	24.8937	24.0107	25.2928	24.6029	23.8882	25.2589	26.4114	27.7105	27.706	22.3529	22.5198	22.2554	22.4767	22.2555	24.3787	25.0418	25.0708	25.225	22.0525	22.0025	23.6525	21.6264	21.8657	21.9146	23.1208	22.9472	23.1317	3	1	0	2	2	2	2	3	3	2	0	3	2	0
19.3909	19.7722	19.5589	19.8263	20.1901	21.19	20.3372	19.994	19.8504	19.5373	NaN	19.8738	20.1493	19.9182	19.8934	19.241	19.4773	NaN	16.8114	16.5962	16.8196	16.587	NaN	NaN	24.8031	24.2555	23.0291	17.2242	16.8368	17.9511	16.7532	17.0389	16.8142	16.4557	16.6987	17.8553	0	0	0	0	0	1	0	0	0	0	0	0	0	0
27.1242	27.1569	27.666	28.0871	28.1846	28.025	28.0908	28.1537	28.4623	27.4205	27.7702	27.7379	27.5366	28.0282	27.6528	28.046	28.0138	28.1216	29.0408	29.1226	30.4555	30.1647	30.3853	29.8886	29.317	29.384	28.9406	30.9551	30.8373	31.2721	31.324	30.7939	31.4077	30.9198	30.9482	31.0324	16	18	13	18	23	17	21	25	13	13	16	13	13	13
26.2022	26.114	26.03	25.6584	25.7104	25.5908	24.6117	25.9141	26.0089	23.9056	25.3283	25.4611	24.8421	24.8778	25.1939	26.4569	26.2209	27.3628	21.0986	21.7696	21.8412	21.2738	21.7173	21.3009	24.4109	24.2151	24.4241	21.0914	21.4239	21.3892	21.4205	21.6472	21.8598	21.9199	22.2886	22.4488	3	3	2	2	2	2	1	3	4	2	3	2	1	2
19.5755	20.1066	19.7224	19.4394	19.3576	19.4428	20.4453	18.744	19.8632	19.6515	19.7547	19.6549	20.0273	NaN	NaN	18.5501	18.7865	18.4591	18.5993	19.3971	20.8582	19.7573	19.8289	20.639	20.4486	20.4807	19.3616	19.8686	20.0585	20.4466	20.8881	19.8217	21.619	19.6862	20.2043	20.0328	0	1	1	1	0	0	1	0	0	1	0	0	1	0
25.0049	25.1002	25.0792	25.1544	25.453	25.3028	25.7074	25.4607	25.8416	24.8213	25.0264	24.9934	25.3068	25.2327	24.6842	23.9789	24.4754	24.7979	23.2506	23.3471	23.926	24.3733	24.7086	24.8322	24.477	24.6991	24.0848	24.8444	24.8177	24.8841	24.9989	24.7134	25.6655	23.9855	24.86	24.9395	2	4	2	3	2	3	4	4	3	2	2	2	3	1
16.1427	16.3225	17.7799	19.585	19.4994	19.7614	18.6726	19.6542	20.7171	21.9444	22.3376	20.9803	18.9366	19.4317	19.5444	15.1363	NaN	15.3993	23.7425	20.8823	23.7858	22.3271	21.0444	21.9868	20.5724	21.2845	19.7735	27.0929	26.6044	27.6839	20.8826	23.0045	21.209	23.5579	23.117	21.2522	0	0	0	1	0	0	0	0	0	2	2	0	0	0
21.3827	23.4283	21.031	22.1085	21.914	21.6981	19.6704	19.4344	19.5525	19.9277	21.4404	20.7902	19.3909	20.6627	19.8778	20.2026	19.1592	20.0843	26.4808	26.4192	25.8845	25.1558	26.2093	26.2568	25.5895	25.2579	25.2788	25.0183	25.7961	25.3761	26.0519	26.4768	25.4243	25.235	25.1935	25.733	0	1	0	0	0	0	0	0	0	0	0	0	0	0
19.8575	NaN	19.351	18.6552	20.2683	18.7054	19.0165	NaN	21.211	20.0158	NaN	NaN	19.631	NaN	19.2641	20.1372	20.0375	21.3091	19.3624	18.4383	17.9145	NaN	NaN	NaN	19.2527	19.4627	19.0986	NaN	NaN	NaN	NaN	NaN	NaN	NaN	NaN	NaN	1	0	0	0	0	0	0	0	1	0	0	0	0	0
21.8578	22.6253	21.8983	21.3764	21.6521	21.8303	21.7501	21.167	21.286	21.6657	21.3541	21.7471	20.7954	21.5947	21.7373	21.5203	20.2038	22.4497	22.088	22.7366	22.3252	22.8095	23.353	23.1303	24.0867	23.4936	24.5469	22.5841	22.5532	22.3685	22.8806	22.2952	22.5741	23.4906	23.59	23.8507	0	2	0	0	0	0	0	0	0	0	0	0	0	0
29.501	29.1159	30.5381	30.3551	29.9344	29.5695	30.2719	28.8906	30.2528	30.7661	30.5652	30.662	30.0316	30.4068	30.1387	30.0798	29.1445	29.8881	17.6169	17.5288	13.7011	17.4584	13.8314	NaN	13.5738	13.5229	18.7386	16.1177	15.396	15.641	15.0276	13.7098	13.5778	15.471	13.6481	15.7964	12	14	12	14	13	10	13	8	14	15	16	13	14	14
21.4528	21.2765	21.6625	20.785	21.4309	20.3813	21.756	21.1234	21.3825	20.9626	21.1895	21.2225	21.0573	21.0612	21.9206	20.5784	20.4007	19.7692	24.7347	24.5705	22.9589	23.7162	23.1054	23.0871	NaN	16.8037	22.1635	23.7665	23.2554	22.23	22.2412	23.0601	22.5298	21.865	22.055	22.154	0	0	0	0	0	0	0	0	0	0	0	0	0	0
25.5511	25.841	25.7987	25.493	25.2498	25.341	25.4471	25.6403	25.6082	25.1976	25.2005	25.1541	24.5402	24.9852	24.9774	25.7563	25.6306	25.4531	27.2354	26.7934	24.9012	26.5427	25.6559	24.713	24.8065	25.108	25.066	26.1045	26.0925	25.9408	25.5657	26.3752	25.7783	26.0308	25.3021	25.4719	6	8	7	5	6	8	4	3	6	5	6	6	3	6
22.3801	22.7417	22.2448	23.1183	23.0108	23.0066	22.1645	18.752	18.5266	22.0385	22.1041	22.4864	21.9806	22.4477	21.1751	22.8752	22.2373	22.2541	28.2451	27.8777	25.0025	25.1967	25.139	23.1678	25.4187	25.5029	25.0103	24.865	24.8271	23.3692	23.8958	24.6018	23.2814	25.2887	24.4999	24.6634	0	0	0	0	0	0	0	0	0	0	0	0	0	0
NaN	NaN	NaN	NaN	NaN	NaN	NaN	NaN	NaN	NaN	NaN	NaN	NaN	NaN	NaN	NaN	NaN	NaN	21.9436	NaN	21.2208	22.1226	21.7852	22.1978	NaN	NaN	NaN	21.7837	22.8815	22.5136	22.3453	22.5606	22.7398	22.7996	21.5559	21.2335	0	0	0	0	0	0	0	0	0	0	0	0	0	0
22.2447	22.6814	22.7661	22.7961	22.6219	22.5004	22.467	22.9795	24.0988	22.024	22.261	22.7596	21.9695	22.4073	22.2247	20.8933	21.3095	21.1863	26.0684	26.2104	26.5818	26.301	26.4229	26.3907	25.524	25.8739	25.8725	26.5228	26.7752	26.205	27.7347	27.4882	25.9059	25.7336	26.6492	26.2769	1	1	2	1	1	1	1	2	1	0	1	1	1	1
27.4619	27.4995	27.938	27.9356	27.8859	27.6351	27.9318	28.4271	28.3528	27.3056	27.5433	27.89	27.7762	28.3977	27.5167	26.9723	26.7797	26.8729	27.1072	27.2486	28.6007	27.7873	28.3263	28.4366	27.4849	27.5343	26.6988	28.3202	28.3624	28.6371	28.9947	28.7055	29.2269	27.762	28.3215	28.2603	11	8	10	8	9	6	7	8	8	8	8	7	7	8
20.1495	19.936	20.4584	19.7821	19.7824	18.516	18.8536	18.7319	20.3851	18.3886	19.5231	19.3502	19.2124	18.1173	18.9689	20.3356	23.4086	20.4783	23.269	23.314	22.4282	23.4123	23.9547	24.0574	25.7771	25.3593	25.8428	22.6934	23.4697	23.4255	22.8984	22.34	22.4927	24.0398	24.1854	24.3982	0	0	0	0	0	0	0	0	0	0	0	0	0	0
23.8385	23.8798	24.7282	25.0841	25.2088	24.8618	24.4474	24.5472	25.6023	24.77	24.8467	25.0756	24.2623	24.9754	24.8672	24.5984	24.7851	24.7797	22.8146	22.9026	23.7623	24.3968	24.6557	23.9884	23.9209	24.0402	23.3535	23.8274	24.4144	24.5274	24.8314	24.2629	24.3297	24.4686	24.4451	24.2809	3	3	8	8	10	13	5	6	9	5	8	8	5	8
18.6433	19.082	NaN	18.6749	19.0287	NaN	NaN	19.2059	18.7399	NaN	18.4355	NaN	18.6766	18.9395	19.094	20.0583	20.8915	20.1248	NaN	NaN	NaN	19.2368	19.2905	NaN	NaN	19.2055	19.0686	19.2944	19.0718	19.222	NaN	NaN	NaN	NaN	NaN	18.7995	0	0	0	0	0	0	0	0	0	0	0	0	0	0
19.7662	19.3201	19.8027	19.5275	19.2271	19.7362	20.3264	23.6739	20.8422	19.2373	19.4728	NaN	19.1668	NaN	NaN	18.891	19.0517	19.8632	19.3606	20.3499	20.6404	NaN	18.5097	NaN	20.451	20.2963	22.6323	NaN	18.1357	NaN	NaN	NaN	NaN	NaN	18.6958	18.6722	0	0	0	0	0	0	0	2	0	0	0	0	0	0
21.4922	20.7451	21.4855	20.5276	20.614	20.6041	20.4592	20.5583	20.5883	20.2054	20.5597	20.2233	20.5514	20.2164	21.2785	21.3141	20.99	20.1723	17.9266	20.1604	18.2244	20.3084	20.1823	19.6371	23.1377	22.4942	22.6985	19.0851	18.1207	19.5543	19.9919	20.2777	18.29	20.2158	19.919	20.0419	3	0	2	1	2	2	1	0	1	0	1	0	1	0
28.3028	28.1736	28.2238	28.0061	28.3774	28.2927	28.636	28.5991	28.2124	28.2793	28.151	28.2352	28.376	28.2268	28.5101	28.9907	28.924	28.9107	29.9817	29.6897	29.0943	29.8711	29.26	29.1467	28.6818	28.3839	28.9576	29.4623	29.3996	29.2249	28.9616	29.5234	29.4478	28.9031	28.866	29.0656	11	10	13	11	13	15	15	13	9	9	12	11	12	10
21.5496	21.7437	21.6441	22.4157	22.5196	22.8763	21.8463	21.8972	21.4995	21.8934	NaN	22.7334	NaN	21.6515	21.6018	22.3559	22.5137	22.3892	21.3207	21.1125	20.401	20.8339	20.9168	20.9169	23.1359	23.5775	23.606	21.2077	21.0439	21.0779	20.5672	20.7752	20.5982	21.3475	21.1438	21.5433	0	0	0	0	0	1	0	0	0	0	0	0	0	1
21.0378	21.2111	20.3145	21.4531	22.6804	21.2947	21.0652	22.2784	22.7497	21.3358	20.1975	21.0532	20.87	21.2545	21.4069	21.674	22.3758	22.4106	22.0172	22.2752	22.1486	22.6606	21.8387	21.7737	20.6754	20.9523	21.8007	23.1969	22.6271	22.7157	22.1231	22.1484	22.8612	22.1307	21.6176	21.4326	0	0	0	0	1	0	0	1	1	0	0	0	0	0
NaN	18.894	NaN	NaN	NaN	18.182	17.8539	18.3499	NaN	17.9505	17.9431	NaN	17.8815	NaN	18.1805	NaN	21.6406	21.636	16.8198	17.1984	16.8012	17.4335	17.2481	NaN	18.5357	18.1355	18.1004	16.8779	17.6291	16.988	NaN	17.1623	17.4763	17.2044	17.8454	NaN	0	0	0	0	0	0	0	0	0	0	0	0	0	0
23.8998	24.2489	24.2437	24.1202	23.7611	24.4492	24.1388	24.3192	23.5206	23.6781	23.7697	23.6049	24.049	23.6533	23.8661	23.6497	22.6462	23.7361	24.7974	24.5282	24.5756	23.8476	23.1398	22.4849	22.6972	23.102	22.9045	23.6047	23.6662	23.7651	23.6531	24.1935	23.6934	23.042	22.7904	22.9573	3	2	2	2	1	2	2	2	1	1	1	1	3	3
24.8653	24.9545	25.0354	24.8209	24.5237	25.3747	24.2732	24.5768	25.0915	24.7199	25.4333	24.6167	25.2859	25.4292	24.3853	25.3168	24.9077	25.2429	26.4248	26.4181	26.8682	26.1298	26.5434	26.7098	25.0921	24.5495	24.687	26.6617	26.445	26.8044	26.3988	26.0066	26.4201	26.339	26.188	26.0489	1	1	1	0	0	1	0	0	0	0	1	0	1	1
23.9168	23.7271	24.0096	24.1682	24.3686	24.4443	23.1854	23.9714	23.8247	24.0599	24.5991	23.4362	24.944	25.3679	24.9756	23.9222	23.5805	23.9263	26.1515	26.4162	27.1866	26.98	27.1861	27.1871	25.8975	25.8015	25.2969	27.3796	27.3196	27.7803	27.3122	27.4255	27.4242	27.0324	26.8865	26.9559	0	0	0	2	2	2	0	1	0	2	2	0	1	2
25.6813	25.4075	25.2446	25.6658	25.6047	25.1303	25.3876	25.3256	25.1805	24.6533	25.1234	25.1008	24.2262	25.2225	25.3415	25.8913	25.43	25.9721	25.8102	25.2728	24.9459	25.9222	25.4018	24.6562	25.6946	25.5159	25.7601	25.5264	25.2518	26.4182	25.0471	25.1757	25.6903	25.0708	25.6588	25.6005	3	1	1	2	2	2	1	1	0	0	2	0	0	1
28.3962	28.3982	28.3864	28.4761	28.2964	28.3087	28.4698	28.6117	28.6319	28.3745	28.3561	28.4714	28.381	28.5374	28.8444	29.0399	29.0562	29.0872	26.8343	27.2131	27.0079	27.1614	27.2843	27.6215	28.7011	28.3992	28.4714	26.8663	26.8919	26.7836	27.0932	27.0219	26.8879	27.5297	27.8082	27.7869	23	20	16	18	17	18	19	20	20	15	20	17	23	18
21.726	21.8505	21.8778	21.9699	21.9942	22.1409	22.6203	22.2997	22.1153	22.4829	22.2294	22.533	22.6065	22.7918	22.3246	22.9833	22.7428	22.6714	20.8944	23.5574	22.5066	23.1251	22.8264	21.8938	22.6484	22.0437	22.7075	21.792	23.2761	21.7543	22.7444	23.8319	23.1541	22.7883	22.7887	22.6565	2	3	1	2	2	2	1	1	1	1	1	2	2	1
23.3956	22.9084	22.5402	21.8173	22.6097	22.909	22.4329	22.803	22.0923	22.5429	22.0653	23.1518	22.5035	22.7413	22.6694	22.6492	22.948	22.6165	21.5361	21.7917	20.8841	21.4501	21.5281	22.1792	22.8167	22.808	22.9216	20.4536	20.6876	21.0639	20.7643	21.2889	20.6434	20.9853	21.0599	22.6294	2	1	1	0	1	2	2	4	0	2	1	2	2	2
NaN	NaN	NaN	NaN	NaN	NaN	NaN	NaN	NaN	NaN	NaN	NaN	18.0012	NaN	NaN	NaN	18.3526	NaN	18.8202	NaN	NaN	18.6462	17.6535	NaN	19.8275	20.1157	19.8019	NaN	17.8241	NaN	NaN	NaN	NaN	NaN	NaN	NaN	0	0	0	0	0	0	0	0	0	0	0	0	0	0
19.9273	19.9978	19.8131	19.4725	19.4649	19.5351	19.6161	19.9976	20.1693	19.4895	19.7653	19.8802	19.4427	19.4623	19.6002	20.9353	20.9845	21.1122	NaN	19.0256	19.2806	19.0119	19.0699	19.8114	21.5294	20.4723	21.128	19.1735	19.423	NaN	20.0387	19.4557	19.39	19.3221	19.9264	19.7621	0	0	0	0	0	0	0	0	0	0	0	0	0	0
NaN	NaN	NaN	NaN	NaN	19.6793	20.4324	20.4273	20.0662	18.7354	NaN	20.7142	19.1625	18.8196	19.2701	19.975	19.9405	20.085	20.106	19.8331	19.8577	19.5555	19.7968	NaN	20.5289	20.596	21.9769	19.64	19.2501	19.4355	NaN	19.4045	19.3779	19.9704	21.739	20.7268	0	0	0	0	0	0	0	0	0	0	0	0	0	0
25.7974	25.6942	25.1639	26.0648	25.9978	26.0611	25.9987	27.0233	26.05	25.8707	26.051	26.1097	25.8171	25.5922	25.9499	27.4162	27.8041	27.7419	24.9107	25.6228	25.2009	25.5391	25.4845	25.6782	26.9378	26.6634	26.9418	24.999	25.0319	24.96	25.2984	25.0589	24.8484	25.7717	25.9797	26.132	8	6	2	6	6	6	9	12	6	8	9	10	5	6
23.56	22.9895	23.0156	22.3545	22.4684	22.558	22.9769	22.628	21.1313	23.0122	23.1373	23.3124	23.0802	22.3416	23.1922	22.0433	22.4249	22.5768	22.3759	23.1262	22.47	21.5953	22.0383	24.4189	20.49	NaN	20.6951	21.7046	21.2296	21.2765	21.409	20.914	22.1959	21.6067	20.976	20.5232	3	2	1	1	0	2	1	1	0	1	1	1	2	1
26.6788	26.5919	25.4034	25.0563	24.7207	25.1891	26.0757	24.9976	24.9988	26.1553	25.4913	25.2135	26.5946	25.6028	25.9814	23.1991	23.7111	21.0356	28.2535	28.043	28.2495	28.2229	27.9435	28.5631	25.5173	26.2916	25.8457	28.0108	27.7826	27.7405	27.7347	27.6829	28.4705	27.4321	27.3493	27.3939	5	7	0	1	1	1	4	1	1	3	2	1	4	0
24.2216	24.7057	24.4746	24.2539	24.1905	24.0922	24.2938	24.0377	24.2293	23.9841	24.0423	24.1384	23.8782	23.8664	23.5867	23.7934	23.6414	23.7115	24.5867	24.4923	25.6701	25.7123	25.0762	26.211	23.9707	24.482	23.8307	24.731	24.8967	25.1225	23.9985	24.3241	24.4978	24.3595	23.8525	23.8501	6	7	5	3	4	4	3	2	1	4	6	3	3	4
26.1328	26.2697	25.6706	26.0168	26.0938	26.23	25.7423	26.7124	26.2066	25.4489	25.7768	25.8414	25.4331	24.1468	25.3528	26.9866	26.7307	26.882	23.8246	24.0026	24.1972	23.8222	24.2295	24.3903	25.3299	26.0843	25.7017	23.5853	23.4844	23.5991	23.8091	23.718	23.592	24.4341	24.6974	24.7693	5	5	2	6	8	4	2	6	4	2	3	2	2	0
19.4528	18.947	NaN	NaN	NaN	NaN	NaN	NaN	NaN	NaN	NaN	NaN	18.8643	NaN	NaN	20.1016	21.4692	21.5099	NaN	NaN	NaN	NaN	NaN	NaN	NaN	NaN	NaN	NaN	NaN	NaN	NaN	NaN	NaN	NaN	NaN	NaN	0	0	0	0	0	0	0	0	0	0	0	0	0	0
26.857	27.0344	26.7557	27.2176	26.9569	26.9895	26.9953	27.1294	27.5017	26.9749	27.4605	27.0258	26.6562	27.2679	27.2013	27.9662	27.6422	27.7421	25.6359	26.05	25.5664	25.7582	25.7265	25.8753	26.9296	26.9032	27.0127	25.2614	25.2223	25.1415	25.6544	25.6041	25.1046	26.1314	26.1777	26.2321	7	6	5	5	3	6	6	9	9	5	4	6	6	7
26.3852	26.1042	26.0687	27.4742	27.2589	27.0922	26.8849	26.8185	27.5635	26.1654	26.302	26.3008	26.1967	26.8535	26.9382	27.4451	27.5882	27.2204	20.8647	20.3572	21.5196	22.7909	23.1682	21.3718	25.1452	24.8037	24.5662	23.7122	22.9552	24.0709	23.1806	23.872	21.9272	24.4432	24.5882	23.6861	7	9	7	19	22	14	13	12	23	10	5	9	7	9
18.66	18.6934	NaN	NaN	NaN	NaN	NaN	NaN	NaN	18.3105	NaN	18.6418	NaN	NaN	NaN	NaN	NaN	NaN	19.0498	19.2973	22.208	20.0351	20.8961	23.4789	NaN	NaN	NaN	19.4834	19.2849	19.4193	18.984	19.2107	19.2349	19.4842	20.0199	19.6569	0	0	0	0	0	0	0	0	0	0	0	0	0	0
25.2751	25.3372	24.8416	24.3831	24.3939	24.5749	25.2379	24.4309	23.7403	24.9483	24.4988	23.8253	24.7403	23.2954	23.7247	22.4117	22.1392	22.3912	25.4744	25.3161	25.8322	25.4774	25.7507	26.8116	23.313	24.0503	23.8889	25.8795	25.5432	25.5267	25.0282	24.3125	25.6272	24.1987	24.8401	24.7161	4	8	4	2	2	2	7	2	1	4	3	3	1	0
NaN	NaN	NaN	NaN	NaN	NaN	NaN	NaN	NaN	NaN	NaN	NaN	NaN	NaN	NaN	NaN	NaN	NaN	NaN	NaN	NaN	NaN	NaN	NaN	NaN	NaN	NaN	NaN	NaN	NaN	NaN	NaN	NaN	19.1756	19.5527	19.4091	0	0	0	0	0	0	0	0	0	0	0	0	0	0
23.8707	24.1342	23.742	24.2975	23.7792	23.9272	24.4333	25.1597	23.8464	24.0838	24.0199	23.7093	24.0489	24.1643	24.0878	23.5406	22.4005	23.2558	24.192	24.4674	24.4835	24.416	24.0146	24.2626	23.2499	23.2975	23.8479	24.8993	24.195	24.309	23.8828	24.0176	24.3415	24.8203	23.8193	24.0121	1	2	2	2	2	1	2	2	0	1	2	1	1	1
26.7696	26.6734	25.6147	25.4116	25.8047	25.3509	26.9566	26.0816	25.9199	25.8187	26.2259	26.4993	27.0936	26.121	26.649	25.3555	24.2154	24.8229	28.0485	28.0866	28.5363	27.52	27.765	28.1371	25.5185	26.2343	26.0417	27.9908	28.2022	27.9653	28.165	27.7535	29.084	27.343	27.6655	27.6187	5	4	2	1	2	2	3	2	2	1	2	2	4	2
NaN	NaN	NaN	NaN	NaN	NaN	NaN	NaN	NaN	NaN	NaN	NaN	NaN	16.1608	15.9043	NaN	16.9025	NaN	15.8309	NaN	NaN	16.0006	15.777	NaN	20.5228	20.1744	21.2192	NaN	15.6871	NaN	NaN	16.3862	NaN	15.9246	16.1022	NaN	0	0	0	0	0	0	0	0	0	0	0	0	0	0
19.4361	19.3175	NaN	NaN	18.6663	NaN	NaN	NaN	NaN	19.7202	19.6034	NaN	19.2149	19.1452	NaN	NaN	NaN	NaN	20.9301	21.1179	20.9237	20.1172	20.0317	20.1104	21.6372	21.6124	21.765	20.3162	19.8494	21.4903	19.9251	19.9557	20.0094	20.791	19.9281	20.0803	0	0	0	0	0	0	0	0	0	0	0	0	0	0
19.6101	19.3215	19.3479	20.8098	21.5763	19.6201	21.0724	20.0947	21.2447	19.8667	21.7962	21.6063	19.6294	21.9797	19.1801	19.5735	21.0599	20.4665	18.8533	19.5896	20.1084	19.0981	21.2215	21.159	21.0577	21.1832	21.2225	19.9764	19.5334	19.9168	19.718	19.2278	21.9219	19.667	20.2315	19.8227	0	0	0	0	1	0	0	0	0	0	1	1	0	1
18.2604	17.9474	NaN	18.4101	NaN	NaN	NaN	18.1975	NaN	17.6848	17.8794	17.9025	17.7905	17.989	18.2828	18.9492	18.9446	21.0587	NaN	NaN	NaN	NaN	NaN	NaN	NaN	17.7751	NaN	NaN	NaN	NaN	NaN	NaN	NaN	NaN	NaN	NaN	0	0	0	0	0	0	0	0	0	0	0	0	0	0
19.7275	NaN	19.6495	20.1669	19.4889	NaN	19.1348	19.4506	19.9951	20.3405	20.3408	20.2236	19.7	19.2993	20.1015	20.5065	19.7432	20.0786	21.4644	21.0341	20.6103	21.2964	21.0245	20.0973	21.5686	21.4899	20.7671	20.4254	20.5106	20.0376	21.0966	20.4238	20.8976	21.1903	20.9023	20.2757	0	0	0	0	0	0	0	0	0	0	0	0	0	0
22.113	22.4416	21.7007	22.1118	22.123	22.2577	22.187	22.8146	22.5981	22.155	22.1081	22.5456	21.9687	22.2975	22.6538	24.4591	22.0442	23.9833	23.8051	23.9795	23.8778	24.1944	24.7422	24.8999	25.2524	24.9314	24.8457	23.9911	23.9129	23.9837	23.7681	23.7055	23.7208	24.1006	24.618	24.9845	0	1	0	0	0	0	2	1	0	0	1	1	1	0
NaN	NaN	NaN	NaN	NaN	NaN	NaN	NaN	NaN	NaN	NaN	NaN	NaN	NaN	NaN	NaN	NaN	NaN	20.8217	20.937	20.145	21.7461	21.7845	20.0379	NaN	NaN	NaN	21.223	20.7975	20.405	20.291	20.4579	19.8358	NaN	20.6084	21.0192	0	0	0	0	0	0	0	0	0	0	0	0	0	0
23.6903	25.1541	24.5237	23.9048	24.7069	23.9587	21.7431	22.2075	22.0165	24.1137	23.099	22.5033	23.76	22.7389	23.098	23.3434	21.4349	21.4498	NaN	NaN	NaN	23.6654	NaN	NaN	24.555	24.5933	NaN	NaN	NaN	23.1048	NaN	NaN	NaN	26.3428	NaN	NaN	0	0	0	0	1	0	0	0	0	1	0	0	0	0
20.7559	20.4526	21.1004	NaN	NaN	NaN	NaN	NaN	NaN	NaN	NaN	NaN	21.2763	NaN	NaN	20.5059	21.028	NaN	NaN	NaN	NaN	NaN	NaN	NaN	NaN	NaN	NaN	NaN	NaN	NaN	NaN	NaN	NaN	NaN	NaN	NaN	0	0	0	0	0	0	0	0	0	0	0	0	1	1
17.8467	15.7761	17.7723	16.4296	16.3059	18.4941	17.5789	15.3367	15.5547	15.8254	16.1873	18.5493	16.5411	16.7474	15.5942	16.0306	14.9927	14.9138	30.2553	29.2329	28.8246	30.0454	28.4019	28.4905	29.4005	29.2856	29.3843	29.8084	29.4606	29.3532	28.8686	29.718	28.3056	29.7892	29.9227	28.5387	0	0	0	0	0	0	0	0	0	0	0	0	0	0
24.853	24.9025	24.8708	24.6663	25.0887	24.1506	24.5711	24.7053	24.5807	24.4742	24.137	24.869	24.2394	NaN	NaN	NaN	28.0264	NaN	21.0646	NaN	NaN	NaN	NaN	NaN	23.9394	23.2608	23.9991	NaN	NaN	NaN	NaN	NaN	NaN	NaN	NaN	NaN	0	0	0	0	0	1	0	0	0	0	0	0	0	0
19.9128	20.5053	NaN	NaN	NaN	NaN	NaN	NaN	NaN	NaN	19.3348	19.8812	NaN	19.7427	19.9963	NaN	20.1909	NaN	22.9123	23.4081	22.51	22.7104	23.0668	22.9605	23.4371	22.5674	23.3226	22.1867	22.0616	22.7383	23.1259	22.5623	22.4343	23.0651	23.4324	23.6409	0	0	0	0	0	0	0	0	0	0	0	0	0	0
22.7695	22.8827	22.3247	22.8025	23.6969	23.4496	22.8182	24.8369	23.2966	22.4558	22.6374	23.0727	22.5555	22.5079	22.5913	24.0326	24.0201	24.2273	23.7109	24.0086	23.2852	23.2113	22.6861	23.8424	23.3328	24.7846	24.1917	22.9996	23.3196	22.087	22.1784	22.7924	22.9087	23.8316	23.5639	23.2935	1	0	0	1	2	2	1	3	2	2	2	1	1	0
NaN	NaN	NaN	NaN	NaN	NaN	NaN	NaN	NaN	NaN	NaN	NaN	NaN	NaN	NaN	19.1707	19.4991	19.3265	NaN	NaN	NaN	NaN	NaN	NaN	19.8325	19.4757	19.539	NaN	NaN	NaN	NaN	NaN	NaN	NaN	NaN	NaN	0	0	0	0	0	0	0	0	0	0	0	0	0	0
23.5068	23.3408	22.8683	22.7086	23.0879	22.9946	23.6576	23.1772	23.0482	23.2112	23.0897	22.1517	23.0641	22.2817	22.7885	20.8742	21.2816	21.2566	24.3301	23.9171	25.1301	24.7833	24.6913	25.8685	22.3084	22.9933	22.021	25.4475	24.6919	24.9627	23.8095	23.9293	24.9538	23.8666	23.2691	23.4957	2	2	2	1	1	2	2	2	1	1	1	0	2	0
25.9963	25.8487	25.5202	25.7029	25.7099	25.6282	25.2629	25.2892	25.3174	25.8449	26.0073	26.0774	25.8627	25.7862	26.0143	26.0399	25.8343	26.0967	27.1603	27.3248	26.5731	27.0957	27.0732	27.4061	27.7117	27.8751	28.424	26.5114	26.6657	26.5657	26.698	26.8661	26.5539	27.1915	27.3711	27.3935	8	5	8	5	4	5	3	5	5	8	8	7	7	8
17.3525	17.2279	NaN	17.1667	NaN	17.5774	NaN	17.3863	17.7485	18.5625	18.6895	19.4065	17.453	17.6596	17.3422	17.8571	17.5941	17.3173	NaN	17.3669	18.0916	NaN	NaN	NaN	NaN	17.9897	NaN	18.3875	17.8539	19.6741	NaN	17.6314	NaN	17.8704	NaN	NaN	0	0	0	0	0	0	0	0	0	0	0	1	0	0
20.7466	21.2177	20.9939	20.7573	20.5649	20.3957	21.1875	21.2521	20.7884	21.0653	21.4163	20.8251	20.5865	20.8405	20.126	21.6512	21.1557	21.3473	21.3146	21.3862	21.6928	21.4565	22.0398	20.2118	22.4124	23.2109	22.4168	21.6493	21.7954	21.6608	21.7876	21.7453	21.4549	21.616	22.019	21.9172	0	0	0	0	0	0	0	0	0	0	1	0	0	0
24.6808	24.3162	23.8535	23.25	23.4793	22.752	24.7804	23.7524	23.2312	24.4817	23.5356	23.9625	24.8179	24.3648	24.3187	21.5975	21.3301	21.1576	24.4321	23.7256	23.9891	23.9986	24.1639	22.4825	20.1769	21.0637	21.2702	24.5384	23.5865	24.2805	22.9932	22.5981	23.7659	21.7509	22.0478	21.6053	3	3	2	1	1	0	2	2	1	1	0	1	4	2
28.5901	28.7154	28.9423	28.8545	28.7907	28.699	28.6575	28.6805	29.1177	29.1105	29.172	29.1241	28.9559	29.1897	28.9898	28.7423	28.9187	28.7549	31.9927	31.9303	32.241	31.3768	31.469	30.3551	30.9259	31.1191	30.8001	31.335	31.3865	31.1749	31.1884	31.3533	31.3078	30.8538	30.9661	31.111	27	30	26	27	23	31	24	23	30	29	37	27	30	32
22.686	23.7894	22.7766	22.037	22.2726	22.2441	24.0434	21.9892	22.1995	22.8304	22.9025	23.5408	23.0517	21.9989	22.5221	22.3168	23.751	23.0956	23.2519	22.7603	22.1691	22.107	21.9292	21.9718	22.1482	21.4017	22.965	22.4714	22.0886	21.7569	22.1027	22.5092	22.8879	22.1997	22.2218	22.4543	2	2	2	1	2	0	2	1	1	2	1	2	3	1
22.0634	21.871	21.6427	21.1241	21.3339	21.5664	22.045	22.343	22.0418	20.0542	21.0374	21.7201	20.9677	20.0003	20.7626	22.2142	22.0702	22.1836	20.1279	19.8254	20.7664	19.3549	19.2447	20.6888	21.5312	21.1364	22.8366	19.9582	19.3725	20.5203	20.2659	20.5887	19.3183	19.9996	20.2241	20.9938	2	2	1	2	2	1	2	1	1	0	1	1	2	0
24.5621	24.5651	26.2282	24.9079	24.9476	24.7905	24.4611	24.7173	25.2454	24.7389	24.7828	24.5995	24.6669	24.7341	24.561	23.9387	23.8165	23.8761	26.1823	25.9147	27.1388	26.1565	26.2045	26.3397	25.7499	25.738	25.3822	25.8429	25.8421	26.016	26.0575	26.0567	25.8641	25.992	25.38	25.4176	4	8	23	7	11	8	4	2	7	4	4	2	3	5
NaN	NaN	NaN	17.2992	17.6543	17.1343	16.9216	16.6206	16.5387	NaN	NaN	NaN	16.895	NaN	17.9638	17.5706	NaN	17.7595	22.3201	22.6069	22.2758	22.206	22.2038	22.4207	23.4248	22.2968	23.5547	22.4068	22.4688	22.0719	22.2791	22.2772	21.9377	22.6129	22.735	22.8768	0	0	0	0	0	0	0	0	0	0	0	0	0	0
20.395	19.7542	NaN	19.7784	19.5864	19.5254	19.9148	22.3249	20.2285	19.7423	19.2888	19.9736	20.1885	19.3743	19.8191	21.1635	22.9162	22.8666	NaN	NaN	NaN	NaN	NaN	NaN	NaN	19.7765	19.2813	NaN	NaN	NaN	NaN	NaN	NaN	NaN	NaN	NaN	0	0	0	0	0	0	0	1	0	0	0	0	0	0
21.1794	21.4004	21.0104	20.7905	20.6973	20.8341	20.5753	20.5303	20.3645	20.1572	20.8527	20.6084	20.7569	20.6864	20.7749	20.4279	21.0812	20.8234	21.7276	21.9842	21.1737	21.9332	22.0994	21.8736	22.052	22.2138	22.7613	21.9075	21.8879	21.467	21.6621	21.7794	21.5485	22.6476	22.0731	21.6802	0	1	0	0	0	0	0	0	0	0	0	0	0	0
22.697	22.7904	22.0912	21.9356	22.1399	22.0361	21.9978	22.1007	21.9269	22.2695	21.9477	22.565	22.1219	22.2491	22.2254	23.1826	23.3768	22.7998	22.11	21.8421	22.111	22.3328	21.6251	21.98	22.1543	22.3162	22.0499	21.0154	21.671	21.4624	21.289	21.5326	21.5088	22.2003	21.6703	22.7514	0	0	0	0	0	0	0	0	0	0	0	1	0	1
NaN	NaN	NaN	NaN	NaN	NaN	NaN	NaN	NaN	NaN	NaN	NaN	NaN	NaN	NaN	NaN	NaN	NaN	19.5664	19.7075	19.0801	19.2681	19.1284	18.7087	21.6252	22.2138	21.5654	19.0913	19.0284	18.8261	19.2888	19.4788	18.5876	19.424	20.5234	19.5474	0	0	0	0	0	0	0	0	0	0	0	0	0	0
23.5059	23.3677	24.4066	25.1085	25.3667	25.3032	22.3487	21.6679	22.1749	24.7298	22.3815	21.9949	24.5164	22.1143	22.374	21.8724	21.8096	20.5433	19.9886	19.7454	19.3292	19.9727	19.5444	19.0397	21.2045	20.9895	17.5888	20.0973	19.6132	19.9476	18.9177	17.7487	20.6398	20.3566	20.5073	20.2915	1	2	3	1	7	6	1	1	0	6	0	0	4	0
NaN	NaN	21.3111	21.3583	21.4344	NaN	NaN	NaN	NaN	NaN	21.1405	21.3923	21.1817	21.2041	21.1129	20.6985	21.4469	20.6671	25.3715	24.8748	24.5511	24.3308	24.1947	23.406	NaN	23.4936	NaN	23.9361	23.6146	21.4915	20.9193	24.4603	23.8238	23.5062	23.0679	23.2383	0	0	0	0	1	0	0	0	0	0	0	1	0	0
20.3373	20.0184	20.2911	21.4227	NaN	NaN	NaN	20.2167	20.2376	20.2582	NaN	20.1562	NaN	19.7269	19.7852	20.0046	21.1606	21.4483	NaN	19.9611	NaN	18.9208	19.373	NaN	19.5866	19.5513	19.6198	18.9353	NaN	18.3615	18.2132	18.7242	NaN	NaN	NaN	NaN	0	0	0	1	0	0	0	0	0	0	0	0	0	0
24.1637	23.4809	24.0758	23.518	24.5792	24.4061	24.0649	25.0817	25.245	24.052	25.1318	23.8898	24.0095	24.831	23.5532	22.548	20.6984	23.4274	25.429	25.3064	26.6294	25.7674	26.1731	26.169	24.9044	25.2436	24.2329	25.9403	26.0073	26.5952	26.2278	26.2764	26.1711	25.5175	25.5061	25.1654	2	0	1	1	4	1	1	3	3	2	5	1	1	4
20.1526	20.3601	19.711	19.2494	19.7741	19.5942	19.6665	19.7379	19.0836	19.1787	19.6011	19.6316	19.0854	NaN	NaN	19.9624	19.6689	20.3199	NaN	NaN	NaN	NaN	NaN	NaN	22.0024	21.567	21.5507	NaN	NaN	NaN	NaN	NaN	NaN	NaN	NaN	20.0671	0	0	0	0	0	0	0	0	0	0	0	0	0	0
NaN	NaN	17.8039	NaN	NaN	NaN	NaN	NaN	NaN	19.0133	20.3673	NaN	NaN	NaN	NaN	NaN	NaN	NaN	19.3072	19.849	20.7772	20.378	20.0893	21.0056	NaN	21.053	NaN	20.6132	20.2641	21.0352	19.8241	19.792	19.8452	19.9791	19.6198	20.0807	0	0	0	0	0	0	0	0	0	1	0	0	0	0
28.9413	29.0682	28.7429	28.7169	28.6787	28.9069	28.9714	29.0911	28.6285	29.2246	29.2178	28.7481	29.3867	28.9782	29.0249	29.069	28.9385	28.8661	31.4641	31.1665	30.0612	31.1391	30.3523	30.9671	29.1118	29.0324	29.3328	30.9815	30.6451	30.5702	30.3341	30.7816	30.6103	30.5042	30.1522	30.0812	10	13	9	9	7	9	5	11	9	10	12	8	11	8
NaN	NaN	NaN	NaN	NaN	NaN	NaN	NaN	NaN	NaN	NaN	NaN	NaN	NaN	NaN	NaN	NaN	NaN	NaN	NaN	NaN	NaN	NaN	NaN	NaN	NaN	NaN	NaN	NaN	NaN	NaN	NaN	NaN	20.3933	20.6805	20.4133	0	0	0	0	0	0	0	0	0	0	0	0	0	0
24.053	23.1015	24.8661	23.6139	25.822	25.9102	24.7462	25.1139	24.4101	24.5726	25.2207	24.4736	27.4956	26.6371	25.3327	23.7748	23.423	21.6304	19.5779	21.573	20.6433	19.8586	22.1313	21.5982	21.6079	20.5004	21.1046	19.8848	20.2657	19.6933	21.3892	20.6978	19.7925	20.5893	20.7922	NaN	2	0	1	1	5	6	3	4	3	1	3	2	7	5
22.5369	22.8457	23.0941	22.281	22.1729	22.4152	22.5476	22.4953	22.1709	22.511	22.1829	22.6884	21.897	22.313	22.2035	22.3214	22.3854	22.4672	20.9856	21.1392	20.5752	20.7793	20.8013	21.219	21.5339	21.8407	21.8553	20.635	20.6667	20.7656	20.646	20.8372	20.9089	21.1495	21.1702	21.1353	3	3	3	1	2	2	2	2	1	1	1	1	3	1
17.415	NaN	NaN	NaN	NaN	17.2841	17.5135	17.4233	NaN	17.4175	17.6221	17.4443	17.5283	17.6876	17.5589	18.4272	NaN	18.6121	NaN	NaN	NaN	NaN	NaN	NaN	18.2412	20.1296	18.3329	NaN	NaN	NaN	NaN	NaN	17.3239	17.4094	NaN	17.2716	0	0	0	0	0	0	0	0	0	0	0	0	0	0
27.6011	27.3435	27.1197	27.1241	27.1729	27.4222	27.5013	27.0291	26.8633	27.4227	26.8884	26.8604	27.8972	27.2837	27.5138	25.5041	25.8177	25.4506	27.5931	27.4708	28.6277	26.966	27.0506	28.6861	25.4766	25.6589	25.604	27.2771	26.8458	26.6164	26.553	26.0804	27.009	25.8559	25.9395	25.6891	13	16	12	9	9	12	10	8	8	9	7	10	11	9
17.8466	19.7731	18.6304	19.3682	21.719	19.0464	19.9506	19.962	21.7559	19.7461	20.2891	19.5651	20.2223	22.4223	22.296	19.6104	22.0831	19.2219	23.849	23.5603	24.8784	24.6096	25.2419	24.6539	17.2798	21.9404	20.8156	26.1255	26.5214	26.8512	26.5764	26.0608	26.9897	26.3974	25.64	25.6933	0	0	0	0	1	0	0	0	1	0	0	0	0	1
28.4263	28.471	29.0853	29.1707	29.4189	29.3491	29.3747	29.0067	28.3715	28.6256	28.5035	27.6193	28.9173	28.3794	27.8348	28.5978	28.3026	28.3962	25.9907	26.2715	26.4303	26.111	25.4698	25.7991	25.4349	25.4036	25.9327	26.3629	26.3732	26.6585	26.8338	26.6367	26.6745	26.2831	25.911	26.1511	13	13	13	14	14	14	16	15	10	7	6	6	17	11
26.6878	24.9116	24.219	24.4569	24.5031	24.7816	23.9222	21.3534	21.6182	21.9581	25.4776	23.5923	22.71	23.0694	21.3542	22.6545	22.2878	23.5077	28.6471	28.7367	29.2267	27.6207	28.5191	29.2519	28.7987	28.6102	28.7147	27.3761	28.6295	27.7071	29.1744	29.1956	28.0144	28.2263	28.8286	28.4281	8	3	2	1	3	3	1	0	0	0	2	1	0	0
23.4578	23.6722	24.7384	25.0042	25.1218	25.4487	25.6059	25.6926	26.3157	26.3589	26.2939	25.7934	26.0397	25.8096	26.5172	24.7153	25.4252	23.3514	NaN	NaN	NaN	NaN	NaN	NaN	NaN	NaN	NaN	NaN	NaN	NaN	NaN	NaN	NaN	NaN	NaN	NaN	1	1	3	3	2	2	2	2	4	5	4	4	4	3
22.0397	21.4244	21.266	21.667	21.7338	21.6678	21.4956	21.7525	21.9295	22.0462	21.5855	22.5273	21.6044	21.991	22.0245	23.1062	21.5495	22.8095	20.144	20.295	20.1341	20.6469	20.5927	20.9436	NaN	20.9102	20.896	20.0725	20.3956	20.5013	20.2441	20.224	19.8351	20.9319	20.7265	20.8128	0	1	0	0	1	1	0	0	0	1	1	1	0	1
27.4693	27.0554	27.1422	26.7782	26.7854	26.6075	26.8027	26.9731	26.6359	27.0911	26.9062	27.1559	27.2233	27.0511	27.3681	27.0724	27.1102	27.3194	28.4965	28.3948	28.2667	28.6109	27.8325	28.1103	27.3405	26.6326	26.4125	27.6008	27.9578	27.5928	27.6642	27.6167	28.0002	27.7471	27.6373	27.6101	2	2	2	3	3	3	3	4	2	3	3	2	4	2
22.3012	22.344	22.191	21.3808	21.9194	21.7475	22.0282	21.5468	21.534	22.562	22.588	21.6619	22.6431	21.8987	22.1227	20.972	21.3033	20.7941	21.4306	20.7723	22.442	22.5015	22.5596	24.1149	NaN	21.1399	21.3649	23.1628	23.5858	23.4935	23.3886	22.6548	23.8339	22.7072	22.7814	22.4284	2	2	2	0	2	1	1	0	1	1	1	1	3	2
22.156	22.0037	21.8234	22.3817	23.0119	21.7205	22.053	21.8451	22.8317	22.4703	22.3752	22.2865	22.1132	22.4956	23.0239	22.7164	22.1395	22.366	21.4669	NaN	NaN	20.555	21.201	20.3349	22.9745	23.4545	23.1168	NaN	20.9715	NaN	NaN	21.1887	NaN	21.599	21.5856	21.7571	0	0	0	0	2	1	0	0	1	1	1	0	1	1
27.1032	26.7694	26.8026	27.1675	26.8644	26.9098	27.0447	26.7353	26.6721	26.9318	26.7498	27.0889	27.0804	26.8851	27.1778	27.3817	27.285	27.1502	27.0887	26.7866	26.23	27.0966	26.6022	26.5426	26.9731	27.0134	27.223	27.0178	26.6642	27.0936	26.5353	26.7085	26.5997	26.45	26.8428	26.721	7	9	4	8	6	7	8	8	5	6	8	6	10	4
25.3366	24.7934	25.1445	24.5217	24.8922	24.8241	24.7576	24.841	25.6997	25.1815	25.4678	25.022	25.2664	25.8236	25.198	24.5106	24.9833	24.4842	26.7832	26.896	27.0249	26.3984	26.7998	26.9295	26.4622	26.4605	26.308	26.0131	26.4151	26.5105	26.8864	26.6324	26.2269	26.4927	26.5895	26.525	8	1	4	1	2	3	2	3	3	0	5	2	3	4
19.7182	NaN	NaN	NaN	NaN	NaN	NaN	NaN	NaN	NaN	NaN	NaN	NaN	NaN	NaN	NaN	NaN	NaN	NaN	20.7135	23.5052	NaN	NaN	NaN	23.0845	22.7806	24.6376	22.5446	NaN	23.1506	NaN	NaN	21.8364	NaN	NaN	NaN	0	0	0	0	0	0	0	0	0	0	0	0	0	0
28.2764	26.0097	28.1197	29.8758	28.3015	27.9676	27.0079	27.8073	29.79	28.4594	28.5765	28.377	26.7904	29.567	28.7013	27.3116	27.3	28.9978	NaN	NaN	NaN	NaN	NaN	NaN	NaN	19.1239	19.6872	NaN	NaN	15.8533	NaN	17.0117	20.1996	17.3989	16.8017	15.6871	13	8	23	26	24	17	15	18	23	14	17	20	14	19
20.9169	21.5456	20.4367	21.2147	20.2872	20.6102	NaN	20.7702	NaN	21.7881	22.077	20.4587	20.353	21.5927	22.1095	23.2905	22.4811	21.289	19.4852	20.3635	19.384	19.9122	19.5511	19.7058	22.0217	22.0898	21.8342	19.3967	19.2147	19.4106	19.2052	19.4364	19.0406	19.7219	20.4335	19.8125	0	2	0	0	0	0	0	0	0	1	1	0	0	1
26.6934	26.7656	26.8589	26.655	27.0552	26.9346	27.659	26.8445	27.0982	26.7849	26.6335	26.1036	27.0131	25.8957	26.3412	25.4559	25.1391	25.3723	25.6438	25.5805	27.148	27.0088	26.7019	27.1848	25.1129	25.7114	25.2758	27.1839	26.6306	27.0704	26.1619	26.3399	26.7389	25.6798	25.9431	26.0316	3	4	3	4	2	3	2	2	3	1	4	1	2	2
26.8716	27.0282	26.7251	25.5046	25.393	25.8061	25.4253	25.3986	24.9503	25.3246	25.4186	24.5054	25.3611	25.0047	24.1697	24.8929	24.418	24.7314	24.3532	23.8365	24.1665	24.6563	24.2698	24.1249	21.984	22.8362	21.3901	24.4641	24.2394	24.5087	23.7441	24.2686	24.3244	23.6336	23.1016	23.2292	14	17	9	6	4	8	5	7	3	6	5	3	6	3
22.5199	23.9214	NaN	20.9509	20.4584	21.3438	21.0284	21.8474	20.6671	20.4505	23.112	21.0628	21.0229	20.9195	21.8132	23.1427	23.1185	23.348	19.3528	19.1667	20.8727	19.4003	19.7468	21.6225	21.8054	22.4428	23.0472	19.713	19.4802	20.1609	20.3938	19.8519	19.2943	19.9465	20.4857	20.9941	3	2	0	0	1	1	0	0	0	0	2	1	0	0
NaN	NaN	18.9176	NaN	NaN	NaN	NaN	NaN	NaN	18.986	NaN	19.6399	NaN	NaN	18.9039	NaN	NaN	NaN	18.6056	18.8255	19.0339	18.696	19.091	19.4303	19.8832	19.8132	20.5408	19.0151	19.1716	19.5412	NaN	18.8297	NaN	19.3786	19.6357	NaN	0	0	0	0	0	0	0	0	0	0	0	0	0	0
23.108	23.6779	23.6243	22.9247	22.6177	23.236	23.25	23.4262	22.4097	22.207	21.973	22.4291	23.0434	21.5367	22.3425	22.7555	22.1655	22.3877	24.7264	24.5383	24.2617	24.4801	24.7968	24.7933	26.7471	26.7685	26.8708	24.9754	24.3185	24.4622	24.6222	25.0976	24.2094	25.1516	24.9187	25.1679	1	2	1	0	0	1	1	1	0	0	0	0	1	0
19.2518	19.4307	20.2599	21.5561	21.083	20.7189	20.9793	20.6653	21.3465	20.1513	19.8682	20.5277	19.4923	19.8698	20.1477	20.8563	20.5348	20.6998	NaN	NaN	NaN	NaN	NaN	NaN	NaN	NaN	NaN	NaN	NaN	NaN	NaN	NaN	NaN	NaN	NaN	NaN	0	0	1	1	1	1	1	1	1	1	0	1	1	1
23.7566	24.1197	24.5847	23.8739	24.1142	23.8827	24.3299	24.5614	24.3604	24.7939	25.1637	23.9949	24.5892	24.6692	24.7502	23.7485	23.8472	22.875	26.7584	26.5604	25.7804	26.9013	25.8541	25.1597	24.2975	23.7913	24.4403	26.0193	26.6775	25.8576	25.6192	26.666	26.2898	25.8183	25.2284	25.7105	1	1	1	2	1	1	1	2	1	1	1	1	1	2
NaN	NaN	NaN	17.9314	17.8801	18.1017	17.9875	17.9698	17.8702	20.3674	18.952	18.8872	19.2781	18.6633	18.4649	NaN	NaN	NaN	17.5944	NaN	17.7589	NaN	17.608	NaN	NaN	NaN	NaN	17.6951	17.8532	17.6306	NaN	17.531	18.224	NaN	NaN	NaN	0	0	0	0	0	0	0	0	0	1	0	0	0	0
NaN	NaN	20.3451	19.9097	20.0461	19.9349	20.3174	NaN	20.5109	NaN	NaN	19.6251	19.7597	NaN	18.279	NaN	NaN	NaN	18.2557	NaN	17.611	19.7014	20.2131	19.3028	NaN	NaN	20.1009	21.3351	20.7288	20.6648	19.354	19.4544	20.3004	20.0663	19.4789	19.7771	0	0	0	0	0	0	0	0	0	0	0	0	0	0
21.5767	21.6948	20.307	21.0323	21.4326	21.2811	22.8533	20.5465	19.1778	23.1398	21.4827	21.7466	23.263	23.144	23.0579	20.0336	NaN	18.3724	25.1781	25.4047	25.6589	25.6003	25.8255	25.6664	22.6923	24.6075	23.2143	25.6609	25.521	25.2099	25.2851	25.312	25.7456	24.5927	25.1856	25.1582	0	0	0	0	0	0	1	0	0	1	0	0	1	1
NaN	NaN	NaN	NaN	NaN	NaN	NaN	NaN	NaN	20.3738	22.9776	20.0861	NaN	NaN	NaN	NaN	NaN	NaN	19.5396	19.0861	19.4544	18.1808	18.2784	19.3417	NaN	NaN	NaN	22.9225	22.5344	23.069	NaN	18.4083	NaN	18.7956	NaN	NaN	0	0	0	0	0	0	0	0	0	0	1	0	0	0
22.5929	22.6058	22.3065	22.3156	22.863	22.8654	21.4037	21.8396	21.895	22.9283	23.6079	22.6642	23.5613	23.2064	23.0794	21.1709	21.4468	20.9409	17.4864	18.6823	19.5021	19.2372	18.772	19.283	NaN	NaN	19.0469	19.0967	19.2081	19.6148	19.853	NaN	18.6067	18.6847	17.7237	NaN	1	4	2	2	5	5	0	2	2	3	5	2	4	5
29.0825	28.7883	28.5493	28.5778	28.5796	28.637	29.139	28.8247	28.5789	28.7419	28.8127	28.857	29.1464	28.8518	29.0958	28.4406	28.9475	28.5643	30.7098	30.4294	29.6114	30.6095	29.8524	29.8027	28.6424	28.7033	28.958	30.251	30.1809	30.2917	29.4721	30.1443	30.2388	29.6082	29.467	29.2068	8	7	6	8	7	6	5	8	7	7	5	7	8	6
19.1591	19.5013	19.5753	18.5872	18.5694	18.4419	19.3242	19.0541	18.959	18.8015	19.0841	19.0573	18.9616	19.2214	19.0875	18.7438	19.015	18.9129	NaN	18.536	19.4083	18.695	19.1663	NaN	19.5441	21.1685	19.4239	NaN	NaN	NaN	19.2356	NaN	19.7653	NaN	NaN	NaN	0	0	0	0	0	0	0	0	0	0	0	0	0	0
NaN	NaN	NaN	NaN	NaN	NaN	NaN	NaN	NaN	NaN	NaN	NaN	NaN	NaN	NaN	NaN	18.6133	18.4778	21.8987	22.0449	23.9855	23.0168	23.2908	24.3179	21.928	21.1092	20.9834	24.0639	23.4728	24.1697	23.5702	23.6766	24.1568	22.9859	22.9108	23.2419	0	0	0	0	0	0	0	0	0	0	0	0	0	0
19.3276	18.9039	19.0111	19.8772	19.313	19.2206	19.9584	21.4745	19.6599	20.1905	19.1317	18.6818	19.0157	19.3123	19.9515	18.8424	18.5155	17.8784	24.47	24.2726	23.3733	23.3362	22.9671	23.5637	20.346	21.4042	21.171	23.3266	23.0727	22.8052	22.8679	23.2926	22.6291	23.0474	22.2807	22.2915	0	0	0	0	0	0	0	1	0	0	0	0	0	0
20.929	21.6539	21.9977	22.4497	22.665	22.4009	21.3239	21.5162	21.6826	22.9828	21.8929	23.2822	21.4056	21.9397	22.0874	21.1263	22.7402	21.0883	NaN	NaN	NaN	NaN	NaN	NaN	NaN	NaN	NaN	NaN	NaN	NaN	NaN	NaN	NaN	NaN	NaN	NaN	1	1	1	2	3	2	1	2	1	3	2	2	1	1
NaN	NaN	15.4454	NaN	NaN	NaN	NaN	NaN	NaN	20.7929	NaN	20.1771	18.7494	19.9917	19.9092	NaN	22.8097	20.1059	NaN	NaN	NaN	NaN	NaN	NaN	NaN	NaN	17.81	NaN	NaN	NaN	NaN	NaN	NaN	NaN	NaN	16.901	0	0	0	0	0	0	0	0	0	1	0	1	0	0
21.3588	19.9056	NaN	24.7809	19.2981	20.7453	NaN	19.4986	19.1715	19.9107	NaN	NaN	21.2627	NaN	NaN	NaN	17.207	NaN	20.9518	19.6635	19.9628	19.4457	21.0829	18.9595	NaN	NaN	NaN	21.4748	21.5018	22.2717	20.7385	21.1513	23.421	21.3214	21.0918	18.0672	0	0	0	1	0	0	0	0	0	0	0	0	0	0
19.769	19.9479	20.0366	20.9591	20.7809	20.7965	20.4961	22.418	20.4398	20.6504	21.2193	21.219	21.5465	20.4856	20.7508	23.5511	23.5264	22.8521	NaN	NaN	NaN	NaN	NaN	NaN	19.3183	NaN	NaN	19.4647	NaN	NaN	NaN	18.2919	NaN	19.688	18.6028	18.3781	0	0	0	0	0	0	0	1	0	0	0	0	1	0
23.452	22.7798	21.6666	23.0886	22.6	21.0282	22.1914	21.5798	23.7437	21.3343	21.2323	23.116	21.4964	21.2754	21.7268	22.2528	22.9877	22.6985	18.9057	18.9894	19.7168	19.6961	19.1842	20.2264	23.5669	22.3865	22.1653	19.1234	19.3965	19.4924	19.6195	19.5279	20.1149	19.4963	20.2187	20.2111	2	2	0	2	2	0	1	0	3	0	1	1	0	0
27.8278	27.6821	27.5352	27.6113	27.5962	27.6134	27.8033	27.6739	27.493	27.6466	27.789	27.4294	28.0222	27.7861	27.8583	28.0961	27.6065	28.0775	29.7356	29.4564	28.5893	29.4996	28.67	28.4479	27.5438	27.9618	28.3498	29.176	29.0436	29.1316	28.9052	29.4437	29.2625	29.0073	28.4857	28.6064	9	9	11	9	11	10	9	10	8	13	9	8	12	11
22.5252	22.729	21.8724	22.4597	22.6237	22.6006	22.023	22.5207	22.1079	22.319	22.1287	22.3564	22.2314	22.1462	22.3928	22.7709	22.1911	22.5075	22.1121	22.3194	22.3425	21.852	21.7625	21.6874	21.9255	22.1184	21.67	21.6088	22.2753	21.9117	22.0771	21.6092	22.0973	22.0636	22.5201	22.4615	2	3	1	2	1	2	2	1	2	3	2	2	3	2
20.5006	20.9217	21.1721	20.8962	20.5575	21.1436	20.2456	20.359	20.3711	20.3859	20.4888	20.3222	19.6314	20.2161	20.1729	20.7677	20.7403	20.567	NaN	NaN	NaN	NaN	NaN	NaN	19.4597	18.98	19.1374	NaN	NaN	NaN	NaN	NaN	NaN	NaN	NaN	NaN	0	0	0	0	1	1	0	0	0	0	0	0	0	0
20.1108	19.8169	20.1052	20.0224	19.8008	20.7078	18.783	19.1437	19.4936	30.5297	30.6419	30.8015	20.7506	16.5366	18.763	19.2664	19.2261	18.7809	24.681	23.0695	23.4624	23.6426	23.593	22.4922	25.1146	24.7017	25.0674	31.5386	31.3764	31.7285	22.5895	23.9461	23.4651	24.6337	24.1596	24.4756	0	0	0	0	0	0	0	0	0	41	46	51	0	0
26.7793	26.2825	26.1588	26.2919	26.3463	26.1498	25.8499	25.8035	26.1552	26.2612	25.9019	26.2151	26.4104	26.1407	25.9436	26.6557	26.2645	26.1221	25.052	25.8087	25.2751	25.3638	25.7822	25.776	27.117	26.523	26.821	25.5756	25.6881	25.2645	25.4961	25.5341	25.6041	26.0029	25.7789	25.9906	4	4	3	2	2	4	3	2	2	2	2	3	3	2
25.9079	25.4563	25.2841	25.4756	25.8019	25.6609	25.6316	25.4903	25.5942	26.116	26.172	25.7846	26.4558	26.5531	26.4027	26.2028	26.3422	26.2125	28.0317	28.5258	27.8787	27.6632	27.862	28.156	29.0554	28.7827	29.3272	27.4916	27.656	27.4063	27.9002	27.7595	27.6186	28.1242	28.2453	28.4417	6	4	4	4	3	3	3	5	4	5	5	5	6	5
25.3567	25.856	25.3325	25.4951	25.7648	24.8539	25.2956	25.9888	26.1	25.6704	25.7939	26.2117	25.4324	25.4196	25.5362	25.7805	25.8357	25.3977	23.3965	22.214	21.9476	23.5892	22.6212	22.0811	24.4942	24.896	25.0711	23.482	22.1285	22.8474	22.171	22.2073	22.865	23.5725	22.9688	23.9479	4	4	3	4	5	2	4	6	4	5	8	6	5	7
25.0172	25.1242	25.3043	23.9219	23.8766	24.1014	23.5851	23.5459	23.0889	23.7048	23.7615	23.6689	23.6521	23.802	23.6739	23.3283	23.4434	23.5823	24.2546	24.7219	22.7327	24.6942	24.4526	24.5372	25.1687	24.8612	25.2348	24.2057	24.3264	24.0927	24.0267	24.1748	23.6588	24.7771	24.6954	24.8435	9	10	8	4	2	7	3	1	2	2	1	2	2	4
28.4447	28.8348	28.511	28.5305	28.5029	28.6166	28.6419	28.7809	28.5534	28.9784	28.9684	28.4113	28.8935	28.9348	29.0726	28.992	28.8098	28.8247	31.1017	30.5768	29.8819	30.9607	30.2093	29.681	28.7977	28.9648	29.329	30.6929	30.4937	30.2847	29.9066	30.52	30.4315	30.2254	29.8078	29.8858	24	26	20	17	21	21	20	18	20	20	19	22	23	20
23.0928	23.2044	22.9545	22.469	22.6341	22.687	21.7734	20.7075	21.158	20.7792	20.0383	20.8269	21.7123	20.8022	20.3018	21.8361	22.4886	21.0531	20.6223	21.1891	20.174	18.061	NaN	19.6781	18.6904	20.4386	NaN	NaN	NaN	NaN	NaN	NaN	NaN	NaN	NaN	NaN	2	2	2	1	2	2	0	0	0	0	0	0	1	0
24.1675	23.027	23.4125	23.9262	23.8451	23.4623	23.1067	22.9193	23.6953	23.42	23.1153	23.0443	22.4891	22.337	22.5375	22.4764	22.1132	22.2173	19.0232	19.1468	19.611	20.3682	20.9267	19.5589	21.0473	21.4514	20.9501	20.4091	21.8075	21.3773	21.9963	21.3127	21.8789	21.376	22.4541	21.1998	2	2	3	3	3	2	3	1	2	1	1	1	0	0
23.5652	23.7447	23.2465	21.9122	21.9633	21.9087	22.333	23.8603	23.2974	22.9621	23.4157	21.9624	21.6969	23.2441	23.1867	24.9003	25.1464	25.1878	18.491	20.4459	21.1784	20.1794	20.8429	20.7327	24.0159	23.6539	23.6086	20.1215	20.998	20.1176	20.3935	20.7606	21.3447	21.5582	22.0098	21.456	2	3	1	1	0	0	0	1	1	2	1	0	0	1
18.7145	18.5416	18.5097	18.532	18.7354	18.6165	18.9043	19.0554	18.5262	19.0411	18.9551	18.7641	18.898	18.9743	18.8721	21.2593	21.0102	21.6475	17.1374	18.0995	17.8751	17.368	17.9208	17.6959	21.4752	20.8773	19.3285	17.7603	17.8131	17.7085	17.985	17.8924	18.2387	18.5203	18.5116	18.569	0	0	0	0	0	0	0	0	0	0	0	0	0	0
22.2519	22.3721	21.502	21.6404	22.216	22.0301	22.0515	22.5521	22.0186	21.9886	21.8464	21.7028	22.5081	21.0979	22.1331	22.7475	22.2637	22.6869	20.4628	20.5278	20.3371	20.2172	20.4974	21.0081	22.1267	22.002	22.0545	20.7107	20.452	19.8161	20.8367	20.1308	20.0069	21.0847	21.3641	21.2259	1	2	0	1	1	1	1	2	2	1	1	1	1	0
26.3384	26.1959	25.9448	26.4743	26.4336	26.3191	26.1489	27.0394	25.8941	26.1987	25.9476	26.0155	25.6618	25.7235	26.1467	27.0104	27.159	27.2041	23.9632	24.4185	24.0585	24.7558	24.6201	24.9798	26.1583	26.2785	26.1185	24.8245	24.1825	24.0414	24.2874	24.3242	24.2876	24.5583	25.0346	25.1815	4	3	1	3	5	4	3	3	4	4	3	2	4	2
24.2717	24.267	24.7305	24.1982	24.2966	24.2785	23.9733	24.3031	24.3763	24.0425	24.0348	24.3429	24.0934	24.2761	24.3443	24.4644	24.661	24.5921	22.5383	22.8244	22.3455	22.6236	22.7853	23.2828	24.9309	25.0103	25.0679	21.9259	22.2791	22.9603	23.0673	22.3607	22.7142	22.7206	22.9236	23.3456	5	5	4	5	4	4	3	5	4	4	3	4	4	4
20.4889	20.3654	20.8213	20.2842	20.4701	20.5074	20.4922	21.2403	20.7581	21.0558	20.3703	21.1076	20.8876	20.9478	20.4336	21.5834	21.3817	21.2281	23.0613	23.0042	22.2771	22.3438	22.0067	21.2101	20.7729	21.4021	21.3293	22.1394	22.1373	20.7691	19.9749	20.3956	20.5321	20.7477	20.3381	20.4631	0	0	1	0	0	0	0	0	0	0	0	0	0	0
26.4496	26.315	26.4424	26.1134	26.1777	26.2749	25.9837	25.6682	25.2962	25.5275	25.4821	25.2492	25.7963	25.5266	25.1876	24.8957	23.9877	24.8051	24.9669	24.5982	24.802	25.2689	25.332	24.2592	23.1013	23.9524	23.6486	25.0146	24.8962	24.9045	24.0026	24.4709	24.8816	24.9683	24.5147	24.3675	3	2	2	2	2	1	4	1	1	2	2	0	2	1
19.787	20.2094	20.4146	20.6868	20.9134	20.6082	20.4132	20.261	20.209	20.9403	22.2888	20.3077	20.8659	22.2108	22.0156	21.4938	21.5669	21.0125	23.2193	23.4129	24.3025	23.4804	24.0066	23.7678	23.7439	22.9996	22.7404	23.6775	24.0267	23.962	24.1039	24.3815	23.8669	23.5387	23.8604	23.6289	0	0	0	0	0	0	0	0	0	0	1	0	0	1
NaN	NaN	NaN	NaN	NaN	NaN	NaN	NaN	NaN	NaN	NaN	NaN	NaN	NaN	NaN	NaN	NaN	NaN	22.0595	21.8357	21.422	21.5414	22.0533	22.2881	21.3963	22.0758	21.8152	22.2398	22.3157	22.2483	22.3576	22.4799	22.2524	21.5622	21.7102	21.6787	0	0	0	0	0	0	0	0	0	0	0	0	0	0
20.499	20.2778	20.2065	20.2707	20.0033	20.2912	20.0572	20.1169	19.7587	20.2014	20.0764	21.508	20.5079	19.9895	21.2308	20.5292	20.6261	21.4244	19.3689	19.3818	19.0535	19.5419	19.4937	19.8709	20.3645	21.1472	20.671	19.3477	19.4875	19.0448	19.1977	19.2574	18.8003	19.4118	20.0296	19.9645	0	0	0	0	0	0	0	0	0	0	0	1	0	0
NaN	NaN	NaN	19.9276	20.1668	20.3089	20.9075	20.0676	19.835	19.9357	NaN	20.6784	20.0489	NaN	NaN	NaN	NaN	NaN	21.942	NaN	21.766	20.5426	20.7499	18.0528	NaN	NaN	NaN	20.1249	20.8407	20.6364	20.7752	19.9593	19.9028	19.8424	19.7233	20.1075	0	0	0	0	0	0	0	0	0	0	0	0	0	0
24.7752	24.9079	24.9404	25.1372	25.0171	25.1333	25.4486	24.8319	24.6379	24.4812	24.8257	24.6033	24.8753	24.6672	24.8721	23.4368	23.4013	22.787	22.3236	22.9648	23.232	23.5958	23.5914	22.4668	22.3405	22.4121	22.0371	23.9381	22.9541	23.5282	22.9805	23.0368	23.6915	23.0099	23.0949	22.8331	4	4	4	5	4	4	5	4	3	1	3	2	4	3
19.1035	19.1726	18.4245	20.0935	20.0173	19.7443	20.6438	19.4778	19.8827	19.7658	19.1007	20.6085	18.9085	20.4355	20.2856	20.192	20.5893	20.3608	21.6916	20.198	22.3952	19.6292	19.3752	19.3333	NaN	NaN	19.1467	19.6752	NaN	19.3464	19.0604	19.2681	19.3952	18.7969	NaN	NaN	0	0	0	0	0	0	0	0	0	0	0	1	0	0
20.4278	20.8663	20.9062	20.9863	19.7811	19.8397	20.4264	20.5049	21.4498	20.4951	20.7072	20.5122	20.039	19.9927	20.085	20.4347	20.2722	20.3962	NaN	NaN	NaN	20.0837	20.2456	NaN	NaN	NaN	NaN	NaN	NaN	NaN	NaN	NaN	NaN	NaN	NaN	NaN	2	0	0	0	0	1	0	0	1	0	0	0	1	0
NaN	NaN	NaN	NaN	NaN	NaN	NaN	NaN	NaN	NaN	NaN	NaN	NaN	NaN	NaN	NaN	NaN	NaN	20.8073	20.8906	18.8935	21.343	19.0621	19.1929	NaN	NaN	NaN	20.1043	20.0739	20.0469	19.7049	20.2637	19.543	19.8208	NaN	NaN	0	0	0	0	0	0	0	0	0	0	0	0	0	0
NaN	NaN	NaN	NaN	NaN	NaN	NaN	NaN	NaN	NaN	NaN	NaN	18.321	NaN	NaN	NaN	NaN	NaN	18.7085	18.6026	18.5278	19.1881	18.8641	19.0415	NaN	NaN	NaN	18.8903	18.3818	18.7186	18.5667	18.5967	18.4436	18.706	18.8549	18.4045	0	0	0	0	0	0	0	0	0	0	0	0	0	0
23.2647	23.2684	22.9319	23.0484	22.6929	22.5877	22.6477	23.232	23.3774	23.6343	23.6545	23.3313	22.7364	23.2162	22.8521	22.5442	22.1077	22.0909	25.4103	25.2887	25.6753	24.6801	24.8064	24.2194	24.2424	24.5467	24.0245	24.6186	24.9675	24.2912	24.7006	24.8237	25.3551	24.5914	24.4747	24.4301	2	3	0	1	1	1	1	1	1	1	2	1	1	2
21.5825	21.6556	21.0127	20.9945	21.0252	20.8309	20.5376	20.3702	20.8667	21.6797	21.7467	21.3061	21.482	21.7766	22.1805	20.8286	20.9208	21.1438	20.9428	21.3293	20.5137	21.4281	21.2729	21.2643	22.42	22.1218	22.0142	20.7129	20.9746	20.5775	21.2776	21.1916	20.5521	21.942	21.478	21.8356	1	1	0	0	0	0	0	0	0	2	1	2	1	1
21.7108	21.3785	20.9772	20.8358	20.5479	21.0413	20.2006	20.7609	20.3328	21.5192	21.169	21.2838	21.3162	21.2519	21.3219	21.2878	21.5082	21.0122	22.493	22.4409	22.5961	22.4161	21.9204	22.3183	22.5713	22.1386	22.5889	21.9448	22.7242	22.1337	22.6686	22.0899	22.656	22.692	22.3346	22.3645	1	2	1	1	1	1	1	1	1	2	2	1	1	2
20.3792	20.0121	20.3261	19.763	19.8235	20.3468	20.4744	19.8312	20.1523	19.8624	19.7025	20.1267	20.1221	19.8034	NaN	NaN	NaN	20.5133	NaN	NaN	NaN	NaN	NaN	NaN	20.9828	20.3805	20.7378	NaN	NaN	NaN	NaN	NaN	NaN	NaN	NaN	NaN	1	0	0	0	0	0	0	0	0	0	0	0	0	0
NaN	NaN	NaN	NaN	NaN	NaN	NaN	NaN	NaN	NaN	NaN	NaN	NaN	NaN	NaN	NaN	NaN	NaN	21.9407	NaN	NaN	22.5246	21.812	NaN	22.9762	23.6288	24.1323	22.1562	21.4872	21.5451	22.047	22.0076	21.593	NaN	23.2873	24.0261	0	0	0	0	0	0	0	0	0	0	0	0	0	0
28.4155	28.6181	28.2783	28.2509	28.0979	28.1675	28.0687	28.4229	28.0885	28.1257	28.153	28.1789	27.9915	28.241	28.3315	28.9514	28.7024	29.159	28.2052	28.4879	27.8489	28.1739	28.3261	28.4182	28.6813	28.9159	29.2218	27.7573	27.8965	27.6328	27.9712	28.0016	27.3484	28.3259	28.4452	28.563	18	17	18	15	13	12	12	16	11	10	13	14	10	15
23.7958	23.7292	23.1757	23.3836	23.4979	23.7544	23.2771	23.3958	23.8962	23.9038	23.6346	23.4324	23.8134	23.9742	23.8969	24.4937	24.1259	24.3798	21.8148	22.0043	21.9858	22.2053	22.5796	22.6759	23.719	23.9004	23.7499	22.2236	22.3715	22.2626	22.5006	21.9767	22.0796	22.5709	22.6834	22.6831	3	5	4	1	4	2	5	4	4	3	3	6	3	2
NaN	NaN	NaN	NaN	NaN	NaN	NaN	NaN	NaN	NaN	NaN	NaN	NaN	NaN	NaN	NaN	NaN	NaN	22.4335	23.1153	23.197	21.9314	23.1447	23.4815	21.717	21.4705	21.4894	21.7558	21.5245	21.5821	21.5758	21.0039	22.5739	21.6813	21.659	21.5846	0	0	0	0	0	0	0	0	0	0	0	0	0	0
20.6153	20.3321	NaN	19.9841	21.0729	20.0419	19.7149	20.1294	20.1881	20.5158	21.3145	20.0886	19.5003	21.1511	20.3749	NaN	19.0364	19.4056	18.9133	NaN	NaN	18.599	18.4321	NaN	20.3639	20.1467	20.1778	18.5025	NaN	18.5616	NaN	19.3416	19.641	NaN	19.7614	NaN	0	0	0	0	1	0	0	0	0	1	2	0	0	1
18.8303	18.8442	18.5452	18.9628	19.1649	19.2368	18.9545	19.2001	19.1252	19.4133	19.0136	19.3617	19.3984	19.4337	19.4517	19.3779	19.6671	19.1016	18.9225	18.8373	18.6761	19.3	18.7771	18.9434	20.3931	20.1258	19.462	19.2393	19.2764	18.7715	19.479	19.0913	19.0013	19.5737	20.2312	19.3335	0	0	0	0	0	0	0	0	1	0	0	0	0	0
21.9811	22.0727	21.3584	20.7903	20.1869	21.1759	21.7407	22.4308	20.9548	21.1974	21.1772	20.8814	21.6253	20.6757	21.2158	22.7232	23.493	23.3597	20.6877	20.8279	20.4294	20.8099	20.3868	NaN	22.5526	22.6029	22.9034	21.0177	20.4884	20.0849	20.0924	20.5533	20.6787	21.4998	20.4111	20.8232	1	1	1	0	0	0	1	1	1	1	1	0	1	1
21.9167	21.6416	20.9175	21.1339	21.1669	20.9118	20.8444	21.1664	21.3732	21.2134	21.2768	21.1474	21.205	21.8605	21.92	19.6746	20.4383	20.2583	19.5329	19.9856	20.6269	21.057	21.1606	22.0236	20.7432	19.4285	NaN	20.9396	NaN	21.4585	NaN	NaN	21.04	22.0353	NaN	18.3045	1	1	1	1	1	1	1	1	0	1	1	1	2	0
24.4451	24.1848	24.4287	22.2814	22.3549	21.6083	22.845	22.2135	22.5592	23.8648	22.1029	22.0722	22.3249	21.7871	22.5831	21.7144	21.6892	21.4724	25.4277	25.3669	25.5429	25.6531	25.4795	22.3627	22.838	22.7074	23.3985	25.2663	26.1845	24.9242	24.2206	23.7003	25.7004	24.3352	23.626	24.2958	1	1	1	0	0	0	0	0	0	1	0	0	0	0
19.4881	19.7431	19.6451	19.5489	19.5725	19.7554	19.6437	21.8726	19.6064	19.6019	19.29	19.897	19.2927	19.8168	19.7074	20.3483	21.8711	22.6986	18.9193	18.1231	19.2734	18.9978	18.4295	19.1864	19.791	19.8303	19.962	19.2406	18.8139	19.0713	NaN	18.8556	NaN	19.4779	18.9835	19.143	0	0	0	0	0	0	0	1	0	0	0	0	0	0
28.3522	28.4833	28.9466	28.8382	28.598	28.5408	28.4296	28.643	28.5947	27.8094	27.8108	27.7932	27.8589	27.8914	28.1092	28.0404	28.1689	28.1733	27.5082	26.7273	27.3744	26.2215	25.8024	25.9816	25.2846	25.4594	24.8966	26.615	25.8655	25.8216	26.1288	26.0883	26.1544	25.887	25.5978	25.3544	10	10	9	12	11	7	6	8	8	7	4	5	5	11
20.7972	21.0841	21.1305	21.0227	20.4527	20.6011	21.58	21.1478	20.9911	20.1989	20.821	20.8078	19.872	20.1893	20.2182	20.1563	19.348	20.5775	23.2329	22.4536	22.1736	22.7323	22.1526	21.7135	21.3256	20.7487	20.6941	22.7751	22.7307	23.0468	22.6068	22.123	22.5323	21.9176	21.9391	22.2993	0	0	0	1	0	0	1	0	0	0	0	0	0	0
20.1052	19.6836	NaN	NaN	NaN	NaN	NaN	19.7009	NaN	NaN	NaN	NaN	NaN	NaN	NaN	NaN	NaN	NaN	21.2723	21.38	22.089	21.2223	21.1321	22.4405	21.7405	21.586	23.2337	21.9309	22.0524	21.9824	22.0707	22.2279	22.2133	22.6965	22.5524	22.5529	0	0	0	0	0	0	0	0	0	0	0	0	0	0
23.1001	22.9752	23.051	22.8814	22.6833	23.1803	22.6181	22.9267	22.9757	23.4242	23.4339	23.2172	23.5171	23.6715	23.0142	23.2757	23.9573	23.3038	25.1578	25.3758	24.7879	24.583	24.2782	25.5541	25.9215	25.2064	26.4168	24.4447	24.479	24.3024	24.7137	24.8016	24.3355	25.1453	24.6865	25.0894	2	2	1	2	2	2	1	2	1	2	2	2	2	2
20.5289	20.4866	19.979	20.7458	20.8273	20.0998	21.4185	22.0166	21.0312	20.5197	21.2337	21.3396	20.4788	20.4376	20.9429	22.4105	22.4922	21.5081	18.9403	18.6934	19.1943	20.083	20.1051	20.5024	21.1909	21.6004	21.855	NaN	19.7988	19.7338	19.679	19.8321	19.6301	20.7234	20.354	20.4614	0	0	0	1	0	0	0	1	0	0	1	0	0	0
23.8497	24.2835	24.3782	24.1184	24.1291	24.2444	24.3413	24.5602	24.4111	24.3573	23.892	24.464	24.2931	24.5175	24.5232	24.3779	24.3503	24.5176	22.1937	22.4236	21.45	22.8523	22.7705	22.0316	23.4843	23.3073	23.4706	22.355	22.0977	22.3988	21.8137	22.1804	22.0368	22.3924	22.6774	22.5072	6	5	3	2	3	3	3	3	2	4	4	5	4	3
NaN	NaN	NaN	18.0055	17.6769	18.0265	18.4871	19.4613	18.676	18.0842	18.2736	18.5386	17.9093	18.2606	18.3699	20.7556	21.1837	21.2889	NaN	NaN	NaN	NaN	NaN	NaN	NaN	17.8036	NaN	NaN	NaN	NaN	NaN	NaN	NaN	NaN	NaN	NaN	0	0	0	0	0	0	0	0	0	0	0	0	0	0
NaN	NaN	NaN	NaN	NaN	NaN	NaN	NaN	NaN	NaN	NaN	NaN	NaN	NaN	NaN	NaN	20.7126	22.2953	NaN	NaN	NaN	NaN	NaN	NaN	20.0595	19.8049	19.8337	NaN	NaN	NaN	NaN	NaN	NaN	NaN	NaN	NaN	0	0	0	0	0	0	0	0	0	0	0	0	0	0
24.6136	24.3848	22.5536	22.7708	22.9775	23.5975	21.9543	23.1811	23.0181	23.2818	23.307	23.6327	23.9646	22.7502	23.6328	24.7948	24.5309	25.276	21.0938	21.8371	21.319	19.7892	21.0431	21.5646	23.3668	23.3134	23.2785	19.7529	20.4748	19.3371	19.2084	20.4945	20.2019	21.1025	19.8298	21.3386	5	6	0	1	1	3	0	2	2	1	2	3	4	0
23.4514	24.1943	23.5996	23.9135	23.9307	23.7181	22.9846	24.1338	23.9329	23.6915	23.9056	23.4599	23.2233	23.6657	23.9515	25.8545	25.3562	25.6922	20.1881	20.4972	19.6562	20.771	20.7711	NaN	22.6896	22.5813	22.2512	20.4172	20.8245	21.3831	20.9185	21.421	20.5297	22.0379	21.37	21.8634	3	4	3	3	5	4	2	4	3	3	2	3	4	3
29.0486	29.1475	30.326	28.1674	28.3775	28.1225	28.7778	27.804	28.4694	28.0173	28.5521	28.0553	28.0603	27.3129	28.3613	27.4466	27.1427	27.2853	20.5926	20.0099	19.2535	21.5257	21.601	21.3032	NaN	NaN	NaN	20.964	21.69	21.2395	21.5738	21.1103	22.031	20.771	23.1699	21.2904	2	1	2	1	1	1	1	1	2	1	1	1	1	1
26.3221	26.3255	26.8909	26.23	26.1999	26.1402	28.024	26.8628	26.48	27.0049	26.8333	27.1046	26.3107	25.9352	26.6999	26.0449	25.1218	25.6725	NaN	NaN	NaN	17.8583	18.5441	NaN	NaN	18.8593	NaN	NaN	NaN	18.5579	NaN	NaN	NaN	NaN	NaN	17.7345	4	4	5	4	5	4	7	5	4	7	6	6	5	4
27.3413	27.5986	28.1486	28.4993	28.2115	28.4291	29.3458	28.0262	29.2097	28.9276	28.9	28.9956	29.5923	28.921	28.8546	27.3801	27.5612	27.5076	24.7342	25.1529	25.5863	27.041	27.2674	25.1508	26.1754	26.3762	25.9036	27.2236	27.029	27.6536	26.8701	26.4878	27.39	26.7674	26.9965	27.0995	5	6	6	10	10	10	19	10	10	12	13	8	20	13
NaN	NaN	18.644	19.5223	19.4654	19.4469	20.6928	19.4765	NaN	19.5879	19.3885	NaN	19.1683	NaN	NaN	NaN	NaN	NaN	NaN	NaN	NaN	NaN	NaN	NaN	NaN	NaN	NaN	NaN	NaN	NaN	NaN	NaN	NaN	NaN	NaN	NaN	0	0	0	0	0	0	1	0	0	0	0	0	0	0
28.1064	28.5867	29.161	28.6811	28.6389	29.045	29.987	29.0521	29.2104	29.6647	30.0514	29.7114	29.8637	29.3475	29.6732	28.476	28.2279	28.2272	25.2524	25.5173	25.3629	26.6177	27.0937	26.432	25.3407	25.6919	25.2212	27.5913	27.2379	27.7597	26.9184	26.8501	27.9468	27.0853	27.0718	26.8143	4	6	5	4	3	5	6	6	5	4	10	4	8	7
24.106	23.8873	24.1392	23.8687	23.5999	23.503	23.5071	23.903	24.0158	22.3533	22.6219	24.0339	22.529	23.1688	22.7873	24.0279	23.2355	23.842	21.0433	21.0914	20.4902	21.2116	21.0505	20.6403	21.6304	21.0978	20.8972	21.2657	21.1809	21.1391	21.3146	21.461	20.7263	21.4576	20.5212	21.2021	1	1	1	1	1	1	1	2	1	0	1	2	1	1
24.611	24.8108	24.8376	24.7671	25.1684	24.613	25.4049	25.1737	25.315	24.506	24.6026	24.5818	24.2412	24.357	24.4172	26.8552	24.8714	25.0277	NaN	21.5074	21.4007	21.4218	NaN	NaN	23.0333	22.9098	23.3966	NaN	21.5902	22.3645	NaN	NaN	21.3461	21.432	21.7818	20.7538	1	3	3	1	2	1	3	2	3	2	1	1	1	1
19.9284	20.0794	20.6446	20.1163	20.2313	19.854	20.3035	19.7591	19.7806	19.6682	20.0575	19.976	19.4595	19.952	NaN	19.5321	19.9549	20.0125	20.4439	19.8777	20.3081	20.1464	19.7706	19.8168	20.0568	20.0547	19.6182	19.8344	20.2657	20.1293	19.9266	20.0098	19.9945	19.9107	19.7675	19.8774	0	0	0	0	0	0	0	0	0	0	0	0	0	0
23.7398	24.0913	25.8951	24.5181	24.0311	23.8296	23.2411	23.4694	23.6291	23.1203	23.4507	23.86	22.7911	23.1778	22.8241	24.6177	24.1801	24.5339	NaN	NaN	NaN	NaN	NaN	NaN	21.8367	NaN	21.8848	NaN	NaN	NaN	NaN	NaN	NaN	21.1235	20.7093	21.2454	1	1	2	1	1	1	0	1	1	0	0	1	0	0
19.2889	19.1844	19.1917	NaN	NaN	18.7699	18.9442	19.355	19.0091	18.9051	19.2978	19.1552	19.1505	18.424	18.631	19.0559	19.2753	19.1383	21.0197	19.8053	21.0904	19.4251	19.2495	20.3916	21.5539	21.5948	22.5772	NaN	NaN	20.3665	18.8499	19.0384	19.0939	19.7093	18.8511	19.1777	0	0	0	0	0	0	0	0	0	0	0	0	0	0
23.0896	21.2538	21.0108	20.6538	20.6315	22.1989	20.6797	20.001	20.5097	19.9546	19.8389	20.0915	20.2681	20.3771	19.8351	20.0952	19.7502	20.4522	NaN	NaN	19.385	19.4042	19.29	NaN	NaN	19.6039	NaN	19.1401	NaN	19.461	20.0713	19.3465	20.0205	19.5594	19.7461	19.6668	2	1	0	0	1	2	0	0	0	0	0	0	0	0
29.1612	28.8292	28.2844	28.5398	28.7152	28.6519	28.6628	28.9051	28.3103	28.5061	28.5816	28.7199	28.486	28.3144	28.6588	29.3445	29.6667	29.3981	28.3818	29.0279	29.0056	28.0502	28.251	28.1926	28.9103	28.9027	28.997	28.0779	27.8165	27.816	27.5898	27.7873	28.0736	27.9518	28.5787	28.3611	9	10	6	9	10	7	10	12	9	8	8	6	10	7
23.4655	22.9557	21.8173	23.1749	23.1221	22.7338	23.3317	23.097	23.8239	23.5432	NaN	22.9809	23.1658	22.3138	23.2895	21.9351	25.4817	22.6331	22.4602	25.4556	24.1041	21.888	23.3938	22.237	26.8741	25.0241	25.6194	24.4332	24.7182	24.1748	24.9617	23.819	24.8955	23.4995	23.9526	25.0619	0	0	0	0	0	0	0	0	0	1	0	0	0	0
21.6769	22.317	20.863	23.6623	23.37	23.8845	23.1836	24.1682	23.1477	23.204	23.5089	23.4015	22.3469	22.2244	22.8296	26.3668	26.6212	26.6106	20.2412	20.9005	20.25	22.1458	20.1197	20.5152	21.6154	21.9998	22.4293	20.156	19.5098	19.6532	19.9562	20.0882	19.3409	20.5134	20.3909	20.7926	0	1	0	1	1	3	2	3	2	1	1	2	0	0
28.24	28.0732	28.0549	28.3444	28.4243	28.1822	28.2322	28.558	28.2478	28.8308	28.5582	28.2334	28.2929	28.5181	28.5477	28.3975	28.8383	28.6192	29.0752	28.7501	28.5544	28.8276	28.4109	27.828	28.3036	28.311	28.1953	29.0699	28.9214	28.9946	29.0155	29.243	29.4596	29.0346	28.5507	28.8518	8	12	8	12	13	10	14	9	8	13	7	10	12	14
29.6226	29.5434	28.5494	29.8473	29.8078	30.3175	30.0991	30.3399	29.6229	30.006	30.2628	29.8651	30.1053	29.8173	30.3354	30.0918	29.9699	30.2506	30.683	30.4879	29.8165	30.3265	30.1242	29.6018	29.6064	28.9272	29.9276	30.3945	30.7429	30.2118	30.5929	30.6414	31.0182	30.2469	30.1875	30.2721	10	8	7	9	7	10	10	12	6	7	12	9	9	11
23.7142	NaN	NaN	23.7068	23.7103	23.689	25.4127	23.7126	23.2029	25.5568	NaN	24.9253	24.7664	24.1861	24.4576	NaN	NaN	NaN	26.7933	26.3037	25.3765	25.8314	25.0267	24.0211	NaN	NaN	NaN	24.5193	24.6294	26.5244	25.6605	25.8804	26.4798	22.7385	25.2093	24.5479	0	0	0	0	0	0	0	0	0	1	0	0	0	0
21.2584	21.2086	21.4571	22.0713	22.2604	22.9385	23.6213	23.9298	23.455	23.091	23.0995	23.3734	22.4288	21.917	22.7508	22.0104	22.994	23.1654	NaN	NaN	NaN	NaN	NaN	NaN	21.5425	21.5701	20.1729	NaN	NaN	NaN	NaN	NaN	NaN	NaN	NaN	NaN	0	0	0	0	0	1	3	2	2	2	2	1	1	0
26.4767	26.7778	26.5687	27.1732	27.2789	27.2936	27.6954	27.8203	27.9339	27.0951	26.9701	27.4113	26.0707	26.9296	27.1146	27.6338	27.1751	27.5771	24.8034	24.5263	26.8681	25.328	25.0692	29.2247	26.5526	26.5537	28.3082	25.6447	25.4514	25.1396	25.0498	24.8607	24.4514	25.1481	25.131	25.1425	3	4	4	4	5	4	5	6	7	5	6	5	3	6
28.4207	28.4796	28.6681	28.9475	28.8905	28.8076	29.3349	29.4195	29.5103	28.8506	28.6676	28.9381	28.0602	28.5279	28.2098	28.9129	28.6934	28.6839	24.4894	23.3448	26.5307	24.6592	24.2568	28.4615	26.7647	26.6465	28.145	25.091	24.6796	24.6919	24.2051	24.276	24.3238	25.0092	24.0421	24.5003	13	12	12	13	12	14	12	17	16	14	14	11	7	8
18.5409	19.8114	19.9696	20.325	19.9367	19.6557	22.0305	22.4811	22.9908	19.989	19.7374	20.9845	19.5262	21.4348	20.9385	19.1746	NaN	NaN	NaN	NaN	NaN	NaN	NaN	NaN	NaN	NaN	NaN	NaN	NaN	NaN	NaN	NaN	NaN	NaN	NaN	NaN	0	0	0	0	0	0	1	1	1	0	0	0	0	0
NaN	21.2589	21.6737	23.3086	23.1598	23.2461	22.8191	24.5437	25.0492	23.3415	22.8402	25.1132	20.5345	24.3403	23.4595	22.59	22.0946	21.9015	NaN	NaN	NaN	NaN	NaN	NaN	NaN	NaN	NaN	NaN	NaN	NaN	NaN	NaN	NaN	NaN	NaN	NaN	0	1	0	1	1	1	1	1	1	1	1	2	1	1
25.6057	27.0148	27.6187	27.6843	26.8275	27.1363	28.1354	28.4451	28.4147	28.1591	27.6493	28.9036	25.5402	28.8566	27.407	25.0575	24.2475	24.6734	NaN	NaN	NaN	NaN	NaN	NaN	NaN	NaN	NaN	NaN	NaN	NaN	NaN	NaN	NaN	NaN	NaN	NaN	1	1	1	1	1	1	2	2	2	2	2	3	0	3
NaN	NaN	NaN	NaN	NaN	NaN	NaN	NaN	NaN	NaN	NaN	NaN	NaN	NaN	NaN	NaN	18.0098	17.1239	23.9557	23.8745	25.7397	23.8529	23.9342	26.2716	22.4564	23.2248	23.9344	23.3723	23.3233	23.2227	21.3293	23.213	23.2583	24.0759	23.5859	22.7578	0	0	0	0	0	0	0	0	0	0	0	0	0	0
NaN	NaN	NaN	NaN	NaN	NaN	NaN	20.4143	NaN	NaN	NaN	NaN	21.1358	NaN	NaN	22.9778	NaN	NaN	23.7681	24.2274	26.1115	24.3042	24.3435	26.3776	24.1804	24.2854	24.2813	23.6852	23.6196	23.3378	23.0068	22.8404	23.4847	24.291	24.1582	24.2343	0	0	0	0	0	0	0	0	0	0	0	0	0	0
24.7797	25.3575	26.0305	24.0674	24.9381	24.4887	23.9398	23.622	23.0786	24.284	24.4568	23.7032	24.2164	23.7375	22.6746	23.8664	25.0291	23.6534	19.775	20.3044	19.9488	21.0612	20.6712	20.9724	20.3794	20.429	20.5568	20.6356	20.1594	20.2621	21.1453	20.9952	20.2805	20.7336	20.3055	19.8377	7	5	8	4	5	4	3	1	0	4	1	3	3	1
26.1776	26.099	25.8637	25.8093	25.7543	25.9434	26.0334	26.5179	25.7264	26.1007	26.256	25.8247	26.4126	25.9448	26.663	27.0111	26.9677	27.1781	27.9653	27.7376	26.4824	27.8836	26.9994	26.6502	25.7961	25.6868	26.4233	27.631	27.4688	27.4773	27.4536	27.6658	27.7977	27.6344	26.9886	27.0479	2	5	5	5	4	5	4	5	1	3	2	4	4	3
NaN	NaN	NaN	NaN	NaN	NaN	NaN	NaN	NaN	NaN	NaN	NaN	NaN	NaN	NaN	NaN	NaN	NaN	20.9225	NaN	NaN	20.7561	20.5903	20.3798	NaN	NaN	NaN	20.7699	NaN	NaN	20.2804	19.7462	NaN	19.8787	20.0013	20.0497	0	0	0	0	0	0	0	0	0	0	0	0	0	0
18.0012	18.7352	18.193	NaN	19.1606	19.1765	18.1439	18.3042	19.0861	19.0448	19.5852	18.9736	17.97	18.7113	18.6556	21.0102	21.3578	21.6365	NaN	NaN	NaN	16.0388	NaN	NaN	18.7061	18.6693	18.8682	NaN	NaN	NaN	15.9687	NaN	NaN	NaN	NaN	NaN	0	0	0	0	0	0	0	0	0	0	1	0	0	0
23.4493	23.3573	23.4578	23.3525	23.1555	23.4294	23.3106	23.7486	23.5159	23.5758	23.413	23.3882	23.3005	23.9653	23.5321	23.4847	24.0812	23.4093	22.7403	22.9091	23.1495	23.1709	22.9083	22.6267	22.2576	23.2163	23.2808	23.7236	23.2959	23.244	23.3155	23.4311	23.3192	23.1808	22.8359	22.8809	1	3	1	2	2	3	3	2	2	1	3	1	2	2
22.752	22.5661	22.487	23.2544	23.0155	22.6082	22.0474	22.6782	23.6084	21.8366	21.6709	22.4111	20.6262	21.2582	21.3847	23.5923	23.9875	23.4282	23.2362	22.973	22.5498	21.1752	21.1375	22.3043	23.111	23.206	23.3442	22.4292	21.6639	22.298	20.5327	20.4169	20.0802	22.8685	22.4994	21.4572	1	2	1	1	1	1	0	1	3	1	1	1	1	1
NaN	NaN	NaN	NaN	NaN	18.188	NaN	NaN	NaN	NaN	NaN	NaN	NaN	17.4416	18.2637	NaN	NaN	NaN	21.9604	21.4834	22.4858	22.0898	21.9598	20.0473	20.6087	20.169	21.7563	21.592	21.3968	21.5366	21.0695	21.5344	21.4416	21.8229	22.1097	21.5448	0	0	0	0	0	0	0	0	0	0	0	0	0	0
26.2082	26.2767	26.4521	26.6615	26.8364	27.0116	27.1932	26.6879	26.77	26.554	26.7379	26.9148	26.6338	26.1133	25.8762	25.9012	26.3705	26.5033	25.2648	25.3309	26.0327	25.6784	25.9304	26.2081	25.4537	25.6304	24.6497	26.0111	26.214	26.1049	26.319	26.4427	26.9764	26.1895	26.2581	26.1957	3	2	3	2	2	2	3	2	2	1	2	3	2	1
32.301	32.0188	31.8985	32.195	32.2723	32.3274	32.6986	32.272	33.0631	32.2938	32.3567	32.5747	32.7441	32.4435	32.4333	31.7091	31.8924	31.8971	33.3103	33.6715	33.5836	33.3097	33.4948	33.5651	33.7701	33.3177	33.1617	33.2746	33.8175	33.5032	34.6189	34.1795	33.9869	33.4069	33.9875	34.0369	145	129	106	120	126	152	143	133	166	138	139	138	164	129
21.3431	NaN	16.2671	20.3706	18.59	19.217	18.7392	NaN	16.1159	18.0862	20.1223	19.7124	19.5197	19.3369	18.3162	17.357	NaN	16.8904	26.8976	26.9138	26.8624	25.9657	26.4151	27.3353	27.936	25.7088	26.4628	26.0838	27.1062	26.3645	28.4582	27.6639	27.5425	27.4157	27.8823	27.8866	1	0	0	0	0	0	0	0	0	0	0	0	0	0
24.6093	24.0267	24.2127	24.3452	24.7565	24.0164	24.4504	24.7023	25.0186	24.2451	24.3393	25.102	24.903	24.753	24.9	24.2925	24.2411	24.6908	21.9583	22.3059	22.9163	23.18	23.7077	23.5709	24.1607	24.1411	23.4876	24.3586	24.1166	24.9799	24.8404	24.2257	25.4215	23.9013	24.4184	24.493	1	2	0	0	1	1	1	0	0	0	0	0	1	2
23.1312	23.8034	24.2095	23.5075	23.3051	23.4732	23.6695	23.8075	23.4466	23.1806	23.6216	23.1157	22.8683	23.135	23.0729	22.4844	23.0873	21.7286	NaN	NaN	NaN	NaN	NaN	22.072	NaN	NaN	NaN	NaN	21.9797	NaN	NaN	23.1249	NaN	NaN	22.0214	21.969	2	4	2	3	2	1	3	2	1	2	2	1	0	1
NaN	NaN	NaN	NaN	NaN	NaN	NaN	NaN	NaN	NaN	NaN	NaN	NaN	NaN	NaN	NaN	NaN	NaN	NaN	NaN	NaN	NaN	NaN	NaN	22.4447	22.2619	22.1636	NaN	NaN	NaN	20.1341	21.1658	NaN	20.6357	20.2296	20.6282	0	0	0	0	0	0	0	0	0	0	0	0	0	0
NaN	NaN	19.7772	NaN	NaN	NaN	19.9911	NaN	NaN	NaN	19.2138	NaN	NaN	NaN	NaN	NaN	NaN	NaN	20.3608	20.4585	22.7761	22.3499	21.6523	24.9645	20.6529	21.2716	21.8641	21.1273	20.7713	21.0457	20.8231	20.8849	20.0621	20.6406	20.4128	20.7378	0	0	0	0	0	0	0	0	0	0	0	0	0	0
17.8145	18.1035	18.631	NaN	NaN	NaN	NaN	NaN	NaN	NaN	NaN	NaN	NaN	NaN	NaN	17.9766	18.6445	18.6044	25.5867	25.7804	27.6602	25.6304	25.2093	27.1951	24.5559	24.7049	26.0048	25.1407	24.6386	24.6163	24.7804	24.8729	23.9282	25.3777	25.3463	25.5331	0	0	0	0	0	0	0	0	0	0	0	0	0	0
29.8098	29.8716	29.8935	30.1935	30.1633	30.2864	30.433	30.2497	30.7885	29.8739	29.8775	30.1757	30.3294	29.9195	29.9344	29.5777	29.5364	29.4885	30.8215	31.3601	30.6849	30.6797	30.6828	30.6845	31.523	31.6393	31.6	30.7957	31.0032	30.9215	31.6464	31.5405	30.955	30.7614	31.3366	31.2905	6	3	5	7	7	6	8	5	7	8	8	9	7	7
30.6905	30.5317	30.8857	30.6872	30.7684	30.9022	30.7711	31.0751	31.3605	30.8781	31.2963	30.8568	31.3287	31.6264	30.7144	30.0145	30.0872	29.9904	32.4652	32.6391	32.8724	32.433	32.4977	32.5615	31.7252	31.5236	31.4351	32.4506	32.888	32.7472	33.3871	33.028	32.9545	32.2645	32.5701	32.5607	30	26	27	27	29	30	35	31	34	32	38	34	38	39
27.2733	27.1502	27.3053	27.5212	27.5437	27.6557	27.4873	27.7419	28.1016	26.8533	27.6805	27.6009	27.223	27.9331	27.2509	26.2539	25.8911	26.6195	28.9865	29.102	29.2507	28.6707	28.9427	29.2261	28.4649	28.1753	27.9659	28.8041	29.1214	29.0938	29.708	29.5923	29.2281	28.5432	28.8822	28.9498	3	5	2	3	4	4	3	3	5	3	5	5	2	5
25.9807	25.4119	26.3039	26.0019	25.8876	26.2696	25.7103	25.9093	25.4729	26.4028	26.228	26.6787	26.1801	26.2783	25.6035	25.7163	24.3553	24.2291	29.1345	28.9738	28.7806	28.4018	28.5066	27.2653	25.9804	26.7841	25.901	28.701	28.2439	28.2014	27.3968	28.3055	28.0985	27.6212	26.9242	27.7003	1	0	1	0	0	1	0	0	0	1	1	1	0	0
24.6173	25.3875	24.8879	25.4579	24.6667	25.1274	26.1712	25.3259	25.9523	25.0819	25.2806	26.0737	25.5601	26.2451	25.2891	24.9462	25.2208	24.6791	28.2581	27.9993	28.4544	28.0962	28.1912	27.7821	26.1675	26.9093	27.6392	28.0582	28.7411	27.5815	26.9578	27.5907	28.67	27.3737	27.1963	27.3289	1	1	0	1	0	0	1	0	0	0	2	1	1	1
24.2291	24.1973	23.7528	23.4248	23.294	23.4073	23.5095	23.786	24.0711	23.8534	24.473	23.5508	24.4721	23.8761	23.8473	23.6372	23.2624	23.8681	26.8197	26.6901	26.9403	25.8391	25.7172	25.7536	25.4074	25.3107	24.748	26.1618	25.9882	26.6091	25.9864	25.7676	26.09	25.1765	25.0919	25.4514	2	2	1	3	1	1	1	3	0	1	1	0	4	1
NaN	NaN	NaN	NaN	NaN	NaN	NaN	NaN	NaN	NaN	NaN	NaN	NaN	NaN	NaN	NaN	NaN	NaN	23.6982	24.2353	25.2003	25.1091	25.0442	25.9014	24.4791	24.3536	24.3669	24.7749	25.0768	25.438	24.0898	24.5198	24.6734	25.0561	24.8758	25.1495	0	0	0	0	0	0	0	0	0	0	0	0	0	0
NaN	NaN	NaN	NaN	NaN	NaN	NaN	NaN	NaN	NaN	NaN	NaN	NaN	NaN	NaN	NaN	NaN	NaN	NaN	19.3411	22.9808	19.8298	20.0284	24.2207	NaN	NaN	NaN	19.2266	18.8051	18.655	19.0662	NaN	17.8545	19.0709	20.2632	19.1462	0	0	0	0	0	0	0	0	0	0	0	0	0	0
NaN	NaN	NaN	NaN	NaN	NaN	NaN	NaN	NaN	NaN	NaN	NaN	NaN	NaN	NaN	NaN	NaN	NaN	20.5398	20.3768	23.6223	22.2431	21.636	23.7238	NaN	NaN	NaN	21.3403	20.936	19.8352	20.3654	20.4838	19.6555	20.9043	20.954	20.982	0	0	0	0	0	0	0	0	0	0	0	0	0	0
22.8015	23.977	25.6576	26.5853	26.757	26.9768	28.2867	29.0797	29.6579	27.2156	27.3431	27.7004	26.2342	23.81	27.0655	25.7977	25.4114	26.1851	NaN	NaN	17.6956	NaN	17.8016	17.0177	16.6184	NaN	NaN	NaN	NaN	NaN	NaN	NaN	NaN	16.3746	18.1803	NaN	0	1	4	4	3	6	6	5	7	3	4	4	4	1
28.9896	29.5373	29.402	28.9282	29.087	29.1982	31.1846	29.4621	29.8522	29.5356	27.7708	29.6421	29.9959	27.5826	29.9113	25.9604	26.1339	26.6838	18.2744	NaN	NaN	NaN	16.7627	NaN	NaN	NaN	NaN	NaN	NaN	NaN	17.8721	NaN	NaN	NaN	17.7022	17.5609	4	4	3	4	3	3	5	6	5	3	3	4	4	2
28.8448	29.5536	28.3768	28.5641	28.2235	28.3008	30.3316	31.107	30.9929	29.9372	29.6348	29.2455	28.957	29.1901	29.3359	27.5013	26.9984	27.3464	NaN	NaN	NaN	NaN	NaN	NaN	18.5125	18.8065	NaN	NaN	NaN	NaN	NaN	NaN	NaN	NaN	NaN	NaN	5	5	2	5	3	3	4	7	9	7	4	6	3	5
NaN	NaN	NaN	NaN	NaN	NaN	NaN	NaN	NaN	NaN	NaN	NaN	NaN	NaN	NaN	NaN	NaN	NaN	NaN	NaN	NaN	17.8746	17.5495	18.5164	18.2289	20.3676	20.1699	18.087	NaN	NaN	17.9062	NaN	NaN	18.3267	17.8677	18.1238	0	0	0	0	0	0	0	0	0	0	0	0	0	0
28.4873	28.5359	28.5332	28.5496	28.5443	28.5992	28.1864	28.1753	28.0303	28.0055	27.9459	28.3286	28.1637	27.9958	28.2763	28.2111	28.3133	28.4274	28.2087	28.9282	27.8192	28.902	28.9088	28.3498	30.0168	29.6247	29.8044	28.7661	28.4879	28.2755	28.4462	28.4663	28.094	28.7731	29.2025	29.1293	10	12	6	10	9	11	6	6	6	8	11	6	7	5
21.645	22.235	22.0724	23.9259	23.146	22.727	23.9066	24.9538	25.4669	22.814	23.1336	25.3108	21.8953	25.1018	24.5698	22.0958	22.1351	20.811	NaN	NaN	NaN	18.0962	17.6298	NaN	19.5947	19.6149	19.2099	NaN	NaN	NaN	17.8602	18.0034	NaN	NaN	18.3542	17.5826	2	2	2	2	2	2	2	2	3	0	2	3	1	4
28.2969	28.4418	28.2785	28.1748	27.8939	28.2377	27.5388	27.1	27.2353	27.8062	27.8989	27.8643	27.6627	27.6178	27.7443	27.5839	27.6479	27.5517	28.6293	29.048	28.6232	28.6413	28.7238	28.7493	29.5677	29.5362	29.7352	28.3393	28.3008	28.198	28.381	28.6695	27.9298	28.9907	29.1083	29.193	19	15	11	10	9	16	6	8	9	10	13	10	11	11
24.2626	24.1303	24.2112	24.1551	24.2606	24.3679	24.4473	24.3783	24.9531	24.2116	24.376	24.2966	24.6612	24.9898	24.3782	24.8629	24.4638	24.789	26.3635	26.5536	28.2677	27.1303	27.5187	27.1274	25.9643	26.0367	25.6572	28.1343	27.9561	28.404	28.4816	28.0062	28.6338	27.6991	27.7781	28.1861	1	1	1	1	1	1	1	1	1	1	1	1	2	1
24.8681	25.2877	25.3926	24.5644	25.0151	24.2803	23.3539	23.1024	24.0298	23.6401	22.971	24.7144	24.2496	23.8991	23.9843	24.7973	25.1852	24.6999	20.7187	19.9436	20.6852	20.6048	20.2789	20.1801	21.1541	21.0817	21.2377	20.8534	20.697	20.6163	20.6836	20.6238	20.641	20.2457	19.7288	19.5993	7	4	6	5	6	2	1	0	4	3	1	3	3	1
32.1581	31.8405	31.8037	31.9192	31.9599	31.7776	32.2292	32.2132	31.9865	31.903	31.7082	31.8652	31.8391	31.8529	31.9585	32.6507	32.3981	32.4931	30.1693	30.246	30.1609	30.2217	30.1396	30.4125	31.0662	31.2133	31.0097	29.9235	29.8681	29.9721	29.8607	29.7634	29.8585	30.2689	30.3663	30.3627	25	23	22	22	26	24	21	30	28	23	24	23	21	23
26.817	27.0459	27.2284	27.3475	27.3966	27.4798	26.5489	26.8157	26.6553	27.2492	27.3957	27.2045	27.0264	26.952	27.3056	27.5646	27.5229	27.4503	17.8565	16.8414	18.2895	18.7583	19.8978	NaN	22.4014	21.3391	23.0527	18.5082	18.1687	18.1155	16.5806	18.6332	17.0373	17.3244	16.1582	19.9553	7	8	6	5	5	6	6	7	6	6	5	5	6	3
23.5266	23.4224	23.1803	23.2798	23.2915	23.276	22.489	22.3661	22.4889	22.7273	22.6732	22.2939	22.0334	22.4464	23.1284	23.0394	22.8346	23.6408	22.1196	23.0768	23.4586	23.258	23.3026	24.0639	23.8591	24.3363	24.0842	22.859	22.5743	22.612	22.29	22.7541	22.3854	23.1054	23.289	23.6059	4	2	2	2	3	1	1	0	0	2	0	0	0	0
28.4172	28.3036	28.2598	28.9332	28.8895	28.932	29.0077	28.8995	28.7741	28.8765	28.9654	28.794	28.7141	28.7463	29.0897	28.704	28.3223	28.6821	29.2347	29.0408	28.8746	28.6679	28.6006	28.528	27.8358	27.7661	28.2183	29.1691	28.945	28.7074	28.5191	28.9196	29.214	28.5115	28.1705	28.2687	10	10	9	11	9	10	9	10	11	9	7	11	9	9
30.277	30.417	30.1999	30.3739	30.3543	30.4972	30.5285	30.4929	30.1973	30.745	30.4744	30.3068	30.5383	30.4771	30.6973	30.6115	30.326	30.6391	32.44	32.1774	31.1237	32.2965	31.4823	31.7046	30.2303	30.2478	30.6184	32.0658	31.8178	31.8266	31.2458	31.6956	31.8356	31.4985	31.0739	31.0663	27	29	21	22	27	29	32	26	15	26	28	26	29	25
30.1242	29.8679	29.9436	29.8073	30.104	30.1688	29.9951	30.406	30.8144	30.0033	30.4189	30.1278	30.6035	30.621	30.0251	29.1177	28.9972	29.2066	31.7807	32.0924	32.2326	31.764	31.8555	32.19	31.1248	30.7037	30.6277	31.8342	32.2649	32.2065	33.1444	32.6559	32.495	31.8234	32.0677	32.0937	38	30	32	30	34	33	33	35	33	28	38	34	41	38
27.809	27.9631	27.5808	28.0334	28.8626	28.6128	28.3951	28.7344	28.6528	27.9881	28.6706	28.1286	28.6716	28.7639	28.0956	26.9787	26.4557	26.9156	28.2934	28.5043	29.748	29.2612	29.0858	28.8204	28.2329	28.1212	27.5344	28.9558	29.3776	29.2824	29.6821	29.5126	29.8206	28.651	29.0547	29.2287	2	1	1	1	3	3	2	3	4	3	2	2	2	4
23.47	24.4806	24.2787	28.4142	28.2467	27.9634	25.992	25.0506	25.8379	26.6641	25.9502	25.8836	25.6171	26.4589	25.8761	25.7136	26.0083	25.5025	22.6383	22.0785	20.0242	23.0094	23.6842	23.1046	24.1443	23.5168	23.4148	23.1174	24.1891	24.9089	23.7449	22.9165	23.0634	23.8361	25.0994	24.6802	1	2	0	12	13	15	2	2	3	6	2	3	2	7
21.8521	22.4465	22.9928	23.5705	23.6971	23.665	22.9595	22.6938	23.6965	25.0777	23.5264	23.499	22.9142	24.0998	23.3795	23.1388	22.7418	23.768	NaN	NaN	NaN	NaN	NaN	NaN	NaN	NaN	NaN	NaN	NaN	NaN	NaN	NaN	NaN	NaN	NaN	NaN	0	0	0	0	0	0	0	0	0	1	0	0	0	1
NaN	NaN	NaN	NaN	NaN	NaN	NaN	NaN	NaN	NaN	25.0844	NaN	24.9831	NaN	NaN	NaN	NaN	NaN	26.2356	26.2784	26.9525	26.8153	26.8153	27.4484	24.8658	25.1857	25.8658	26.6016	26.7025	26.5845	26.4695	27.0169	26.3937	26.3261	26.0758	25.9822	0	0	0	0	0	0	0	0	0	0	0	0	0	0
NaN	NaN	NaN	NaN	NaN	18.6389	NaN	NaN	NaN	NaN	NaN	NaN	NaN	NaN	NaN	NaN	NaN	NaN	24.3089	24.573	23.3689	24.0679	24.5341	23.3639	25.8028	25.3319	25.4712	23.6762	23.5633	23.5062	23.4539	24.0371	23.2587	24.3253	24.0789	24.1684	0	0	0	0	0	0	0	0	0	0	0	0	0	0
30.0389	29.6234	29.9916	29.7526	30.028	29.4146	29.3072	30.4976	30.841	29.4564	29.2479	29.5427	30.0209	30.5513	29.5297	28.9729	29.299	29.0468	30.1943	29.9239	31.5268	30.1724	30.6152	30.4394	30.1802	29.9723	29.4517	31.0048	30.8533	31.0313	30.9442	30.8629	31.6337	30.444	30.7645	30.4624	2	3	2	3	3	3	3	6	5	3	2	2	4	3
27.8721	28.187	28.2365	27.8089	27.8781	27.4289	27.7232	27.5704	28.147	27.6772	27.4454	27.8117	27.577	27.7206	27.3346	28.3938	28.2642	28.3924	27.6474	27.6829	28.328	28.0914	28.1236	27.6872	28.5148	28.7621	28.5806	28.3975	28.0604	28.0691	28.1858	27.9945	27.7195	27.8671	28.005	28.013	8	8	5	3	5	4	4	5	3	6	5	4	7	5
24.9332	25.0118	24.9356	25.4202	25.731	25.658	25.2161	25.4105	25.6516	25.2624	25.1747	25.2749	25.3674	26.0279	25.0905	31.4987	31.365	31.3319	25.8824	26.0248	27.2598	26.8011	27.3847	26.8447	26.9332	26.8885	26.7321	27.6197	27.5217	28.2294	28.0879	27.4988	28.2889	30.3748	30.7757	30.4673	1	1	2	2	1	2	2	3	2	2	3	3	2	5
30.289	30.3479	30.5163	30.2242	30.1011	30.0385	30.2061	30.4808	30.4481	30.0744	30.1145	30.1102	30.0982	30.2846	30.1993	30.4411	30.4811	30.3998	29.2445	29.4056	29.6159	29.435	29.51	29.8701	30.2873	30.228	30.22	29.3292	29.3192	29.4454	29.1665	29.127	29.1718	29.4459	29.5216	29.5639	51	51	40	43	44	44	39	50	47	37	48	43	46	44
19.5154	19.2079	NaN	NaN	NaN	NaN	NaN	NaN	NaN	NaN	NaN	19.227	19.4082	NaN	NaN	21.1295	21.1265	20.4868	20.5014	20.9057	22.0931	21.4719	21.2125	21.3826	21.1737	21.309	21.8563	21.177	21.5115	21.3257	21.8836	21.8282	21.1181	21.8156	22.3789	22.1808	0	0	0	0	0	0	0	0	0	0	0	0	0	0
22.8603	22.0077	21.6196	22.4505	22.5365	22.3421	22.5292	22.5152	23.2327	22.4205	22.708	23.2316	22.7855	22.1593	23.3329	24.639	24.5753	24.3037	NaN	NaN	NaN	NaN	NaN	NaN	20.7984	20.4504	NaN	NaN	NaN	NaN	NaN	NaN	NaN	NaN	18.4526	NaN	1	0	0	1	2	1	0	0	1	1	1	3	0	0
25.5378	24.8604	24.6557	25.4453	25.1853	25.7974	25.2733	26.0839	26.4511	23.8849	24.8879	25.5188	25.1697	24.812	25.6247	26.3414	26.8389	27.1292	NaN	NaN	NaN	NaN	NaN	NaN	23.221	22.3938	20.5867	NaN	NaN	NaN	NaN	NaN	NaN	18.0693	NaN	NaN	3	2	2	3	2	4	4	4	5	1	3	2	3	2
29.6169	29.2525	27.0922	27.6631	29.3499	29.2225	26.9851	29.9503	29.3335	28.9672	28.8205	29.1976	29.6884	29.1977	29.7438	29.7861	27.7049	30.202	14.7312	NaN	NaN	14.1874	15.8151	NaN	27.596	25.322	24.3719	15.3726	14.6956	14.3994	14.5638	15.1392	15.132	14.4515	16.069	16.0038	23	21	10	15	18	16	10	16	13	14	16	15	18	12
NaN	NaN	NaN	NaN	NaN	NaN	NaN	NaN	NaN	NaN	NaN	NaN	NaN	NaN	NaN	NaN	NaN	NaN	20.7366	22.5086	19.8331	20.8509	20.7929	19.6139	23.4039	22.965	23.1025	20.1343	20.4763	20.154	20.4435	20.4734	19.8927	20.8897	22.4416	22.0743	0	0	0	0	0	0	0	0	0	0	0	0	0	0
NaN	NaN	NaN	NaN	NaN	19.5203	NaN	NaN	20.3715	19.539	19.5328	NaN	NaN	20.0006	19.725	20.3989	20.6845	20.5471	21.9163	22.0606	23.9274	23.1207	23.3389	23.5554	22.0904	21.7108	21.8415	23.4127	23.0411	23.3038	22.8365	22.8159	23.0492	23.9988	23.5585	23.7258	0	0	0	0	0	0	0	0	0	0	0	0	0	0
22.6883	22.8371	23.2736	22.8029	22.4077	22.4013	22.8388	22.2564	22.7734	22.7008	23.2801	23.0649	22.9434	23.021	22.921	22.9642	22.7264	22.683	21.6265	22.073	22.1031	22.0861	22.328	22.6433	22.4607	23.4451	23.8097	21.9614	21.8124	21.5765	21.9517	21.8046	21.5061	22.8172	22.9068	22.5082	0	1	1	0	1	0	0	0	0	0	1	0	0	1
21.7632	22.2463	21.8121	21.9464	22.0415	22.1186	22.5714	21.9247	21.7852	21.8725	22.8358	21.8467	22.2801	21.9462	22.5016	21.7294	22.8227	23.1006	22.9189	22.3688	22.5213	22.6538	23.018	21.2927	22.6841	22.796	22.6896	22.8891	22.4539	22.3324	21.7178	21.2762	21.8842	22.2369	21.898	21.676	0	0	1	1	1	1	0	1	1	1	0	1	2	1
29.4241	29.4994	29.214	29.4367	29.3659	29.502	29.0474	29.55	29.0649	29.3796	29.3866	29.2475	29.3974	29.4808	29.6738	30.2284	30.1363	30.1816	28.3188	28.7002	28.2765	28.6741	28.5565	28.6092	29.0836	28.7414	29.1082	28.3532	28.1479	27.9443	27.8166	28.1726	27.9426	28.7222	28.4608	28.4734	19	23	13	15	19	19	15	20	12	13	21	21	18	19
23.2637	23.18	22.7895	23.5793	23.2159	23.966	23.3661	23.2866	23.1701	22.7905	23.091	22.6216	22.4592	22.6931	22.9959	22.1449	22.1741	22.3424	22.1427	21.9269	21.7403	23.4721	23.6197	24.0351	21.2534	21.7183	21.7124	22.0827	22.1332	23.2487	22.0531	21.6522	21.7585	21.9541	22.0436	22.0829	1	1	0	3	2	1	1	2	1	0	0	0	0	0
21.5475	23.216	22.4325	21.775	21.7556	22.0858	21.4763	21.8542	21.3469	23.1539	21.289	NaN	21.8864	21.442	21.7737	21.5434	21.3819	21.6381	22.4671	20.6269	21.782	21.7157	21.332	20.9815	21.9473	21.9115	23.1596	22.3212	22.1976	21.4369	20.2448	21.3027	21.3644	21.1416	21.2496	20.7561	0	1	2	0	0	0	0	0	0	0	0	0	0	0
26.475	26.7838	26.4054	26.5237	26.3261	26.3654	25.9693	25.3682	25.4885	26.4984	26.4051	26.3999	26.1456	26.2061	26.1715	26.2615	26.0522	26.3828	29.349	29.5455	28.891	29.3465	29.1939	28.9347	30.012	30.1923	30.2405	29.3025	29.2389	29.0801	29.0309	29.1999	28.9959	29.4943	29.52	29.4938	7	8	7	4	6	7	4	1	2	3	5	5	8	4
28.0195	28.4948	28.3694	28.015	27.9955	28.0737	28.1623	28.2575	27.9906	28.1464	28.1283	28.0704	28.0055	28.1396	28.1812	28.1044	27.9565	27.9216	29.1678	28.9899	28.5711	29.4231	28.7912	29.0468	28.2115	28.1618	28.3836	29.0444	28.9682	28.8284	28.455	28.8294	28.4604	28.5091	28.4397	28.4065	14	9	8	11	13	12	9	11	8	12	9	9	10	13
19.633	19.4394	20.0328	NaN	NaN	NaN	19.3941	20.8492	NaN	NaN	NaN	NaN	NaN	NaN	NaN	20.4301	20.6289	20.1505	NaN	NaN	17.9795	NaN	NaN	NaN	21.9352	22.2345	21.8291	NaN	NaN	18.5558	NaN	NaN	18.0913	17.6484	17.8385	NaN	0	0	0	0	0	0	0	1	0	0	0	0	0	0
25.1459	25.1127	25.431	26.5936	25.3552	24.937	24.683	24.9352	26.8608	23.925	25.1319	26.1588	24.3882	24.8672	26.5739	26.2923	26.0086	26.2258	20.0942	19.3448	19.033	20.8867	20.706	20.2216	22.2337	22.1441	21.3516	19.8193	19.6449	20.3176	18.7599	20.0951	19.9403	19.8289	19.5008	19.7908	3	4	4	3	4	2	3	3	5	2	3	4	1	3
26.8622	26.4415	27.1018	27.5142	27.471	27.3492	28.7643	28.0581	28.8091	27.8507	27.0866	27.6352	27.6096	27.4898	27.9685	26.3456	26.0072	26.492	18.3617	18.6732	21.7863	19.8351	20.2466	22.3805	21.3106	21.6791	20.2511	NaN	NaN	NaN	20.0882	19.3545	19.5951	22.5312	22.7966	22.6612	5	4	4	5	4	5	6	3	7	4	4	6	5	4
26.2202	26.0033	26.2232	26.3452	26.103	25.8578	26.1528	25.8927	26.0425	26.0739	25.9751	26.2149	26.0243	26.4466	26.0242	31.1471	31.3042	31.049	26.6676	26.8278	28.1783	27.6418	28.0573	28.0021	27.156	27.1703	27.2219	28.4265	28.2589	29.0256	28.8372	28.2688	29.05	30.6713	31.2192	30.9429	4	1	2	5	5	4	4	4	3	5	2	3	5	3
NaN	NaN	NaN	NaN	NaN	NaN	NaN	NaN	NaN	18.6266	19.561	20.7796	NaN	NaN	NaN	NaN	NaN	NaN	18.6391	18.1074	17.8259	NaN	NaN	18.1313	NaN	NaN	NaN	20.8615	19.311	20.2375	17.706	17.9895	NaN	NaN	17.7221	17.4845	0	0	0	0	0	0	0	0	0	0	0	1	0	0
25.1779	25.1421	24.9646	25.0003	25.0584	25.3192	25.2779	25.2081	24.7745	25.415	25.1826	25.3202	25.5733	25.4224	25.3282	25.2081	24.8066	25.2472	27.3675	26.418	26.3174	26.8898	26.4297	26.3321	25.4483	25.5112	25.9702	26.4079	26.7106	25.7294	26.44	26.4482	26.0689	26.198	25.6688	26.238	5	4	4	2	4	4	4	3	2	5	5	5	3	3
22.5817	22.9365	22.8037	22.4935	22.2336	22.8885	22.4498	22.5223	22.2063	22.6741	22.5115	22.6071	22.2944	22.0783	23.0001	22.7197	21.901	23.2165	22.5275	22.8235	22.2329	22.5247	22.2518	22.2757	23.9694	24.0424	23.9874	22.7621	22.4001	22.3738	22.7037	22.7259	22.6679	23.5962	23.1486	23.5136	3	3	2	2	1	3	0	1	1	2	0	0	0	1
23.3318	23.5443	23.2296	23.105	22.9511	22.7848	22.6794	23.1157	23.0415	22.9335	23.3968	23.3547	22.9332	23.2671	23.3582	23.9438	24.0759	23.7117	20.1257	21.0152	20.8223	21.0214	20.7312	21.1521	23.4243	23.3709	24.101	20.935	21.1227	20.9513	20.8239	21.3	20.6854	21.937	21.2262	22.0731	7	2	4	1	3	4	1	3	2	2	3	3	2	4
27.7213	27.8922	27.864	27.2001	27.1374	27.2678	26.9093	26.7111	27.0151	26.9941	27.1604	27.2301	26.7706	27.0112	26.8932	28.2684	28.4124	28.2346	26.017	26.0775	26.4772	26.3116	26.3203	26.3281	27.4185	27.485	27.2132	26.0335	26.1335	26.1459	26.1423	26.2403	25.8721	26.7376	26.6996	26.8201	14	17	12	10	12	14	9	7	7	8	10	11	10	8
28.93	28.899	29.1179	28.8634	28.9752	29.0963	29.2623	28.9327	28.7227	29.2827	28.5912	29.045	28.8674	28.9293	29.2287	28.6851	29.3629	28.9427	29.9187	29.7539	29.5247	29.9557	29.344	29.6019	28.6608	29.0052	29.244	29.5939	29.4658	29.4487	29.1855	29.6559	29.6877	29.2359	28.9448	29.1478	11	7	8	8	10	11	9	8	10	10	9	8	11	9
25.3298	25.1855	25.1418	24.6332	23.7259	24.2679	23.5534	23.657	22.1494	23.2084	23.1602	22.6886	23.3886	23.7337	22.5258	22.6376	21.8887	22.014	21.8574	20.7337	20.7292	22.1656	21.3723	21.5043	NaN	18.7456	NaN	21.8549	21.3613	21.334	20.8767	21.2096	22.0104	20.5476	20.7677	20.2649	8	6	5	4	4	4	3	4	1	2	2	1	2	2
23.9024	23.5807	23.7511	23.3167	23.351	22.8602	22.2476	21.7707	22.0335	24.0142	22.7455	22.9508	22.8829	22.8705	22.9446	22.3047	22.3394	23.231	21.7941	21.9662	22.0473	22.784	22.0347	24.2859	24.6494	24.3874	24.7041	21.7995	22.4768	21.6953	21.62	21.6297	21.7322	22.3025	22.6272	22.9786	1	2	0	1	0	0	0	0	0	1	0	0	0	0
18.572	18.6867	18.7201	20.6744	20.8088	19.0278	17.235	18.1135	18.3859	18.4168	18.588	18.1996	18.3408	18.1284	NaN	NaN	NaN	NaN	NaN	NaN	NaN	NaN	NaN	NaN	NaN	NaN	NaN	NaN	NaN	NaN	NaN	NaN	NaN	NaN	NaN	NaN	1	0	0	2	1	0	0	0	0	0	0	0	0	0
28.6849	28.9073	29.0785	29.1246	29.3914	29.2664	28.9993	29.5883	30.1358	28.8124	29.0399	29.05	28.9033	29.372	28.8118	28.6727	28.8286	29.0813	29.2606	29.7276	29.9931	29.1518	29.7401	29.7438	29.8589	29.9702	29.4552	29.4473	29.8452	29.6204	30.8281	30.3735	30.1383	29.232	30.1603	30.2837	14	11	10	13	16	12	12	16	16	13	17	11	11	17
NaN	NaN	NaN	23.4122	NaN	NaN	NaN	22.9228	NaN	24.3244	NaN	NaN	NaN	NaN	NaN	NaN	NaN	NaN	23.1837	23.0185	22.2775	22.8461	23.224	21.7933	26.2482	26.5714	25.9897	23.2058	23.5479	23.4521	22.8293	22.8873	23.177	22.7429	22.7902	22.7449	0	0	1	1	0	0	0	0	0	1	0	0	0	0
NaN	NaN	NaN	NaN	NaN	NaN	NaN	NaN	NaN	NaN	NaN	NaN	NaN	NaN	NaN	NaN	NaN	NaN	18.6771	18.609	NaN	19.3033	19.9297	NaN	18.6168	18.7721	19.1112	20.2323	19.4323	19.5824	18.1802	18.4445	19.2285	19.1833	18.5644	18.8906	0	0	0	0	0	0	0	0	0	0	0	0	0	0
29.6686	29.6786	30.067	29.9094	30.0748	29.7455	29.7183	30.4562	30.7231	29.7511	30.0144	29.4726	29.8398	30.6382	29.7332	29.3639	29.0053	29.1718	31.166	31.4426	31.6944	31.2155	31.343	31.5798	30.7822	30.8892	30.5407	31.3969	31.7065	31.6835	32.4109	32.2832	31.9052	31.27	31.6447	31.554	22	23	30	26	24	24	20	34	30	24	26	22	27	28
20.4905	20.4792	19.928	19.2945	19.0627	19.4616	19.3858	20.386	19.9259	19.7254	20.0996	19.5526	19.7589	20.005	19.9876	20.4809	20.1963	20.0083	NaN	NaN	NaN	NaN	NaN	18.6346	NaN	NaN	NaN	NaN	NaN	NaN	NaN	NaN	NaN	NaN	NaN	NaN	1	1	1	1	2	1	1	1	1	1	1	1	1	0
24.4984	24.423	24.265	24.0212	24.3337	24.0049	24.7674	24.0249	24.184	23.9183	23.9382	23.8156	24.3473	23.7942	23.5963	NaN	22.8001	NaN	22.6486	22.9791	23.5883	23.0727	23.4749	23.5212	21.9852	22.002	21.1648	23.665	23.3842	23.3809	23.1743	23.0234	24.1771	22.8241	22.9432	22.9494	1	1	1	2	2	2	2	4	2	0	0	0	1	0
19.3553	19.0757	19.4554	19.7906	19.3921	19.6307	19.6458	19.4702	19.084	19.6439	19.9851	NaN	19.6063	19.4279	19.3778	20.287	20.0284	19.7833	NaN	NaN	NaN	18.7961	18.7727	19.0147	20.749	20.8175	20.6415	NaN	NaN	NaN	NaN	18.678	NaN	NaN	NaN	NaN	0	0	0	0	0	0	0	0	0	0	1	0	0	0
18.8024	18.8876	19.2096	19.1821	NaN	19.0154	19.4428	18.6641	NaN	18.4319	18.5798	19.3296	18.3817	NaN	NaN	18.7821	18.8163	19.0887	NaN	NaN	NaN	18.1118	18.367	NaN	21.8149	21.4355	20.8077	18.0741	18.208	18.0364	17.9039	18.5622	18.3779	18.5982	19.3215	NaN	0	0	0	0	0	0	0	0	0	0	0	0	0	0
26.5782	26.3214	26.6502	27.1529	26.8129	27.1754	27.0663	26.9307	26.9439	26.7157	26.4174	26.7665	26.7152	26.3729	26.5501	27.2587	27.4772	27.3765	25.0388	25.0738	24.9809	25.6189	25.5173	25.802	27.3496	26.6726	26.5223	25.2796	25.4516	25.2357	25.4477	25.5164	25.2318	25.7801	25.9469	26.2471	5	5	3	6	7	6	6	5	5	3	5	5	5	5
22.9659	22.0224	21.8548	21.4002	21.456	21.6144	21.7177	22.0075	NaN	22.1974	22.4337	21.7775	21.9146	NaN	22.4726	22.4498	22.5258	22.3736	NaN	23.2808	23.2901	22.8062	24.3266	23.3758	24.4154	24.2142	24.6558	22.9281	23.7838	23.3149	23.9215	23.927	23.2243	24.1848	23.6887	23.4174	1	1	1	1	1	1	1	1	0	1	1	1	1	0
23.3803	24.2702	23.7842	24.024	24.069	23.821	24.1295	23.9413	24.6438	23.8397	24.0465	24.0473	23.568	23.8901	24.382	25.2115	25.3916	25.3357	24.1739	23.7633	23.8698	24.2017	23.8291	23.6553	25.7256	25.4171	25.3277	23.8233	23.7563	23.8382	24.1037	23.7814	23.5672	24.4568	24.2993	24.7256	0	2	3	4	1	6	3	4	6	2	3	5	2	2
27.0192	27.2681	27.2542	27.0604	27.1862	26.9925	27.2621	27.4502	27.051	27.0281	27.0286	27.1051	26.8478	26.7204	26.7902	27.1238	27.1531	27.1674	26.0627	26.3041	25.6396	26.3505	26.1714	25.999	26.4526	26.5474	26.9014	25.9337	25.887	25.8175	25.4461	25.4234	25.3486	26.0972	26.0349	26.2965	9	13	9	9	11	8	13	11	13	9	11	10	8	11
20.1201	20.0394	NaN	18.9423	19.4376	19.538	19.6747	18.8753	NaN	NaN	NaN	19.0514	18.9791	20.5329	19.9493	20.0486	18.6968	20.1447	25.312	25.245	26.9605	24.8864	24.173	24.6961	25.6444	24.2111	24.7799	24.4932	24.3539	23.9261	24.7649	24.4852	24.9207	23.1978	23.7348	22.6181	0	0	0	0	0	0	0	0	0	0	0	0	0	0
21.2485	21.019	21.1184	20.7388	21.3257	21.4632	22.0629	21.8909	21.483	20.4063	21.3579	21.1869	21.1202	20.8171	20.9535	21.1305	20.7767	21.2219	22.8221	22.8887	22.6114	22.0998	22.1813	22.9686	24.2092	23.9176	24.2528	22.2096	21.89	22.1643	22.392	22.4063	22.2915	22.3139	22.8304	22.7127	1	0	0	1	1	1	2	1	1	0	1	0	1	0
23.7629	23.956	23.4349	23.8478	23.6658	23.9107	23.456	23.3402	23.6018	23.1379	22.9954	24.1165	23.3647	23.4748	23.0368	23.5533	23.5776	23.9603	22.6843	22.8003	22.4956	22.9219	22.812	22.7688	24.1019	24.4858	23.7629	22.8175	22.8593	22.7861	22.8895	22.6705	22.8898	23.2863	23.6092	23.5183	2	2	0	2	1	2	0	2	0	1	1	3	0	1
18.3924	18.8107	18.3143	18.6892	18.6556	18.2522	17.9973	17.9568	17.9795	18.0252	NaN	18.0584	17.6047	18.0689	NaN	19.5176	20.0431	18.8577	21.0854	21.195	19.6368	21.7313	21.9586	19.7817	22.2454	21.5134	22.6629	20.5058	21.3536	21.1289	20.7231	21.4425	20.386	22.1307	22.4032	22.3546	0	0	0	0	0	0	0	0	0	0	0	0	0	0
28.285	28.3748	28.0504	28.0787	28.1668	28.1699	28.3792	27.9159	28.1915	28.2695	28.2224	28.2289	28.1598	28.2716	28.3977	27.9381	27.8713	28.2141	30.6076	30.7282	30.7705	30.2684	30.1908	30.5845	31.2931	31.3601	31.4627	30.0714	29.9507	29.8618	29.8111	30.0788	29.5732	30.2975	30.2682	30.2581	9	12	8	11	8	10	12	11	10	12	11	12	12	10
22.2912	20.9971	21.4615	21.4594	21.7187	22.5751	21.4528	22.3592	21.1877	22.7193	23.1525	21.2138	22.7553	22.9483	22.9645	21.1014	22.0413	21.6072	21.1025	21.1323	21.2887	22.4509	24.6139	23.0491	24.5453	24.8939	24.4914	20.7752	21.6906	21.1508	21.0492	20.44	20.6338	22.3333	22.597	22.7724	1	0	1	0	0	1	0	1	0	1	2	0	1	1
22.9733	23.3274	24.0651	23.3749	23.7079	23.4869	24.0863	24.6701	24.6186	24.0221	24.3985	23.6696	22.6651	22.8964	23.9254	23.3664	24.032	24.1848	NaN	NaN	20.4674	20.2294	NaN	NaN	22.6893	22.951	22.8643	NaN	NaN	NaN	20.4506	20.298	NaN	21.0255	20.5621	21.3308	0	1	3	1	2	2	2	3	1	1	2	1	0	0
22.8438	NaN	NaN	22.2295	22.2844	22.5724	22.0303	21.9707	22.2367	22.72	22.4718	22.3915	22.3974	22.4778	22.4877	23.5417	NaN	NaN	22.3111	21.7043	24.1937	24.1997	23.683	22.8538	21.3827	21.7844	20.2296	22.3445	22.5131	21.5741	21.6927	22.3556	22.163	22.2913	22.1545	20.3693	1	0	0	0	0	0	0	0	0	0	1	0	0	0
23.6635	23.8183	24.322	23.6177	23.9501	23.931	23.271	22.8924	23.3037	24.148	24.258	23.9748	24.6547	24.5437	23.6499	24.1486	24.0655	23.7278	22.2797	22.35	21.5917	21.9794	21.6758	20.9027	22.3515	22.2167	22.1209	22.6656	21.8012	22.4985	21.5847	21.842	21.844	22.2934	21.33	21.5523	3	5	4	4	4	4	2	2	3	3	5	7	6	4
19.4257	NaN	19.6222	19.4783	19.0217	19.3436	19.107	19.3282	18.7802	19.2153	19.0726	19.6365	19.1909	18.782	19.1594	19.6611	19.5243	19.6356	20.1413	20.6553	19.8785	19.9826	20.0913	20.9696	21.6882	21.8499	22.5143	NaN	19.6909	NaN	19.6424	19.9764	20.1466	20.108	21.4208	20.4383	0	0	0	0	0	0	0	0	0	0	0	0	0	0
18.9026	18.9999	18.4608	18.9844	18.4009	19.0371	18.5022	18.6201	18.145	18.3378	18.587	NaN	19.2486	18.4466	19.0077	19.4171	19.122	19.5829	18.5294	18.3321	18.4806	18.5638	18.4803	19.3651	20.5907	20.3958	20.1619	18.4221	18.2068	18.3697	18.6824	18.2859	18.0841	19.0712	19.862	19.8401	0	0	0	0	0	0	0	0	0	0	0	0	1	0
25.2303	25.2853	24.6619	25.1404	24.9467	24.9251	24.4492	24.7579	24.7502	25.0747	25.0153	25.1759	24.9718	25.338	25.1508	25.3559	25.3744	24.7469	26.1802	25.8983	25.5939	25.9635	26.0806	26.5263	26.8671	26.6479	27.526	24.9353	25.3206	26.1413	25.474	25.2058	25.7974	25.5825	25.8422	25.9672	4	3	1	2	3	1	0	0	0	1	3	3	2	3
26.2465	26.2171	25.4978	26.0867	25.8757	26.1532	25.8561	27.2701	26.9086	26.2119	26.2928	26.0862	25.832	26.291	26.4858	27.1144	27.2496	27.7769	23.4966	23.9715	23.7122	22.744	23.2863	22.2712	24.9464	24.6779	23.9241	23.0927	22.611	22.9702	22.7536	23.2494	22.5713	24.1234	23.6353	22.5301	3	3	1	3	6	2	5	5	4	4	6	2	6	4
19.7915	20.7659	19.638	20.4462	20.0855	20.2891	20.115	20.2302	20.3927	20.25	19.4968	19.5078	19.6265	19.1922	19.9074	19.4162	NaN	19.124	20.2375	20.2312	20.6627	20.5635	20.7984	20.1586	NaN	20.7211	20.4737	21.1407	21.4457	21.5268	21.1834	21.4276	20.4493	20.9037	20.8697	20.9935	0	1	1	1	1	1	1	1	1	1	0	1	1	0
NaN	19.6586	NaN	19.7789	NaN	19.8909	NaN	NaN	19.7708	19.5062	NaN	NaN	NaN	19.6084	NaN	20.1865	20.3597	21.505	NaN	NaN	NaN	NaN	NaN	NaN	20.582	19.9798	NaN	NaN	NaN	NaN	NaN	NaN	NaN	NaN	NaN	19.2674	0	0	0	0	0	0	0	0	0	0	0	0	0	0
28.7106	28.5958	28.3032	27.983	27.8966	27.9233	28.8702	28.3144	28.2649	28.68	28.7604	28.4298	29.0402	28.3533	28.8544	26.9291	26.5002	26.5629	28.268	28.1485	28.8455	27.6891	28.3887	30.5597	25.7901	26.0431	26.6137	27.5797	27.2156	27.5584	26.8833	26.514	27.7941	26.7681	27.2442	27.0267	16	17	13	12	12	13	18	15	10	15	16	19	20	12
27.0308	27.4317	28.3327	27.6891	27.5887	27.5252	28.0187	27.3388	27.9595	28.1032	27.6335	27.7707	27.2128	27.7634	28.2379	27.167	27.3704	26.4858	NaN	NaN	NaN	17.2069	NaN	NaN	NaN	NaN	NaN	17.1916	16.8762	17.4088	17.2297	16.9728	NaN	NaN	17.6294	NaN	4	7	15	6	7	6	6	5	8	10	11	6	5	10
29.6386	29.8511	30.7572	30.0519	29.7789	29.8009	30.9103	29.5855	30.4105	30.021	29.8408	30.2332	29.5056	30.0697	29.8198	29.0454	29.0242	28.925	16.8187	15.3087	16.9754	16.8389	15.6565	NaN	NaN	NaN	NaN	15.9407	15.5198	14.9042	15.812	17.2135	20.3891	15.8229	16.0923	16.6856	15	15	17	13	13	17	18	13	16	15	14	14	12	13
23.5393	22.7448	22.3471	22.6234	22.5748	22.9817	22.0427	22.8344	22.2581	22.727	22.8996	23.1238	22.7442	23.0412	22.9635	23.2557	24.2238	23.9462	23.4828	23.3769	22.2135	24.0163	23.0287	22.7639	23.4757	23.9512	23.8695	22.9675	22.6212	22.439	22.7344	23.2192	21.7871	22.4845	22.6283	22.7235	2	0	0	1	1	1	0	0	0	0	0	1	0	1
21.1185	21.2382	20.2424	20.4344	20.347	19.9649	21.9063	21.9743	21.2725	20.6261	20.814	NaN	21.3354	20.808	21.3062	21.0655	21.2101	21.1434	20.9172	20.6824	20.126	20.9258	21.0419	21.1464	22.5553	22.638	22.1109	20.2357	20.9332	20.6928	21.1376	20.9499	20.7233	21.0431	21.2367	21.21	1	1	0	1	1	0	1	1	1	1	1	0	1	1
25.9918	26.3107	26.1901	25.6574	25.8156	26.1526	25.8998	26.1265	26.0322	25.6991	26.0808	25.84	26.0445	25.7571	26.0219	26.1094	26.1229	26.2269	26.0033	26.1593	25.3885	26.1898	26.0642	25.4593	26.5904	26.4321	26.5221	25.8648	25.7396	25.672	25.6028	26.0615	25.4662	26.5871	26.3612	26.5909	6	7	6	6	2	5	3	7	3	2	5	6	7	4
28.4553	28.4265	28.3718	28.3784	28.2585	28.2797	28.6021	28.5125	28.1616	28.4319	28.272	28.1498	28.3235	28.3035	28.469	28.3193	28.4512	28.5971	30.6117	30.1829	29.3521	30.3344	29.3837	29.9495	28.5429	28.412	28.9797	29.882	29.862	29.6464	29.2592	29.9015	29.521	29.5028	29.0755	29.2287	13	13	10	13	15	12	12	13	11	14	12	10	12	12
25.0352	25.1218	24.7982	25.4726	24.4765	25.0824	24.9903	26.2926	25.6007	25.7362	25.8416	25.1882	25.5985	25.7749	26.2449	27.2225	26.9408	27.0321	22.8308	22.8929	22.4038	23.7222	23.2455	19.4854	22.9251	22.7922	22.8966	23.3068	22.7192	22.8956	22.4128	22.277	22.2253	24.2913	23.3995	22.5157	2	2	2	3	2	3	3	5	5	5	5	2	3	5
26.8011	26.7532	26.5544	26.7029	26.8879	26.7227	26.6779	26.9438	26.9867	26.9179	26.834	26.7288	26.7264	26.6709	26.7904	27.4513	27.6804	27.7332	24.0629	24.8396	24.8056	24.7242	24.6906	25.0061	25.9371	25.7304	26.0903	24.6666	24.3166	24.4312	24.4103	24.6578	24.2309	24.8882	24.9916	25.1807	8	8	4	5	6	6	4	7	6	7	6	7	7	5
26.8669	26.7341	26.6403	25.8148	25.8419	25.825	26.285	25.9893	26.0111	26.1015	26.2539	26.5705	26.4723	26.1239	26.4858	27.0681	26.7492	26.9899	25.4842	25.6386	25.3403	25.7674	25.674	25.3657	25.9229	25.9829	25.9267	25.0764	25.259	25.2115	25.3025	25.2569	25.3968	25.4443	25.7358	25.7702	13	10	8	6	5	6	5	10	3	7	5	8	8	6
20.9282	21.9939	24.4867	22.6549	21.9654	22.5192	22.3435	21.9236	24.842	23.0582	23.7629	23.6477	22.4047	23.0819	23.1491	22.1146	21.0817	21.488	19.0429	19.6056	20.2203	19.9402	20.5049	20.4912	NaN	18.4087	NaN	19.523	19.4521	20.3682	19.9579	18.4383	19.8484	20.0466	18.9757	19.0378	0	1	7	2	3	3	3	2	6	3	4	4	1	2
NaN	NaN	NaN	NaN	NaN	NaN	NaN	NaN	NaN	NaN	NaN	NaN	NaN	NaN	NaN	NaN	NaN	NaN	19.5724	19.1983	18.3946	18.8918	18.4766	NaN	21.32	21.2608	21.9236	19.9947	17.9939	NaN	18.3085	19.5183	18.3581	19.9287	18.4672	20.9792	0	0	0	0	0	0	0	0	0	0	0	0	0	0
NaN	NaN	NaN	NaN	NaN	NaN	NaN	NaN	NaN	NaN	NaN	NaN	NaN	NaN	NaN	NaN	NaN	NaN	19.7173	19.4619	19.3976	19.1786	19.4115	19.072	NaN	NaN	NaN	19.2324	19.3196	19.3345	19.1533	19.1452	19.1819	19.1174	19.3633	19.4496	0	0	0	0	0	0	0	0	0	0	0	0	0	0
29.2575	29.225	28.8491	29.1994	29.075	29.2096	29.0249	29.5083	29.0285	29.231	29.2319	29.055	29.3774	29.531	29.5354	30.491	30.361	30.3097	27.0671	27.0787	27.1985	27.1804	27.2924	27.7249	27.9078	27.9303	28.1019	27.0732	26.7595	26.7421	26.8066	26.8663	26.8026	27.5444	27.3975	27.4431	25	24	21	26	23	29	26	30	23	25	26	16	34	31
24.7728	24.6922	24.3281	25.3258	25.1917	25.1866	25.0868	25.3362	25.2381	24.9805	24.5602	25.1038	24.4388	25.0226	25.3475	25.3298	25.5582	25.5124	24.2585	24.6231	23.4352	24.6413	24.3996	24.4668	25.9542	26.3012	26.1927	24.2396	24.3597	24.1894	24.0401	24.2527	23.719	24.9586	24.7356	25.0692	6	6	4	8	6	9	8	8	6	5	3	5	4	4
NaN	NaN	NaN	NaN	NaN	NaN	NaN	NaN	NaN	20.6718	22.5584	20.5224	NaN	NaN	NaN	NaN	NaN	NaN	19.0006	18.3616	19.9654	18.2603	19.5864	19.872	NaN	NaN	16.4604	26.8762	25.6314	26.3189	NaN	18.2465	18.5258	NaN	NaN	19.4423	0	0	0	0	0	0	0	0	0	0	2	0	0	0
28.667	28.5986	28.543	28.1329	28.2144	28.2565	29.0014	28.7466	28.3063	28.5811	28.5986	28.6563	28.6797	28.5416	28.6176	28.7067	28.5945	28.5653	30.554	30.3086	29.4544	30.4095	29.6385	29.773	28.6023	28.5454	28.7734	30.1256	29.9646	29.9345	29.583	30.047	29.826	29.5954	29.2254	29.3255	9	10	8	8	9	11	9	10	8	8	12	7	8	7
21.4038	21.1569	21.2801	22.3173	22.709	22.5991	23.3733	22.3392	23.0707	22.4091	20.5422	23.1294	22.4293	22.5858	22.5541	23.1997	23.5053	23.1816	19.3004	19.0817	19.3625	19.8439	19.913	19.9195	21.4881	22.1334	21.9927	19.6367	19.3629	19.2533	19.9031	19.3339	19.54	19.7034	19.9302	20.0768	1	1	1	2	1	1	1	2	1	1	0	1	1	1
20.9846	21.2242	19.8523	19.749	19.4317	20.0254	19.2988	19.207	19.9823	20.1056	20.2354	20.0265	19.6748	20.3834	20.4401	20.5243	NaN	20.888	18.9271	NaN	19.3182	19.7803	19.5919	19.9142	21.6218	20.5676	20.728	19.4295	19.7798	20.3538	20.4784	20.646	19.3196	20.0804	20.4731	20.8727	2	2	0	0	1	0	0	0	1	1	1	1	1	0
21.5944	20.9818	20.7177	21.0398	21.0819	21.3686	22.056	24.0443	22.3105	19.5561	21.1725	21.5341	21.5495	20.4435	21.893	24.5587	25.4918	24.2453	NaN	NaN	NaN	20.7663	20.6184	NaN	20.7709	20.963	20.746	NaN	NaN	NaN	20.5665	21.0338	NaN	20.8626	19.9662	20.5705	0	0	0	0	0	0	0	5	1	0	0	0	0	0
19.9532	20.1476	19.396	19.7277	20.1094	19.9769	19.9316	19.6315	20.2017	20.1817	19.724	19.7774	19.8609	19.7367	19.8374	20.0039	19.9722	20.0211	NaN	NaN	NaN	NaN	18.8516	19.5062	NaN	NaN	NaN	NaN	NaN	18.7728	NaN	NaN	NaN	NaN	NaN	NaN	0	1	0	1	0	1	0	0	0	1	0	0	0	1
19.1925	19.451	19.7337	19.6959	19.4626	19.1923	NaN	NaN	NaN	19.664	19.4819	NaN	19.2919	NaN	NaN	NaN	NaN	NaN	19.8793	19.8443	20.3723	19.9251	19.7753	NaN	NaN	19.8335	NaN	19.7511	19.8867	19.5659	19.7193	19.7109	19.5193	19.5511	19.4769	19.6395	0	0	0	0	0	0	0	0	0	0	0	0	0	0
29.2914	29.3813	29.1958	29.2349	29.1931	29.3873	29.0565	29.0863	28.8986	29.2551	29.2394	29.3198	29.3643	29.3368	29.4584	29.2369	29.2213	29.3359	31.5157	31.7178	30.7135	31.0276	31.1048	31.4851	32.0712	31.8645	32.5899	30.7687	30.6269	30.5477	30.7041	30.7702	30.5367	31.3272	31.2613	31.2899	18	17	16	17	17	20	14	16	14	15	15	15	21	20
19.1208	19.4444	NaN	19.438	19.6329	NaN	NaN	19.7419	19.1178	19.0141	19.1953	NaN	19.5094	19.9439	20.2101	19.7916	NaN	NaN	19.1023	19.5643	19.4841	19.3791	19.1773	NaN	19.6378	20.0466	19.9529	19.3677	19.3413	18.8085	NaN	NaN	NaN	NaN	NaN	NaN	0	0	0	0	0	0	0	0	0	0	0	0	0	0
25.8219	25.8394	26.2124	25.5125	26.3988	26.1801	25.924	26.535	25.9545	26.0458	26.4582	25.4288	26.4437	26.2301	25.5953	24.1381	23.652	23.4522	26.8742	27.2095	27.5258	27.1121	27.0974	27.8828	26.1548	25.449	25.8027	26.9235	27.4904	27.2693	27.378	27.1898	27.869	27.3894	26.6547	27.1143	1	1	1	1	0	1	1	1	1	1	1	1	0	1
20.3104	20.3419	20.4029	20.5298	20.0861	19.8921	20.9828	22.5967	23.5379	21.767	23.1923	21.2567	20.3491	23.0614	22.8132	20.4576	20.4002	19.9051	23.7049	22.3481	24.3441	23.5492	23.6443	25.2571	NaN	21.7217	20.6712	22.1479	23.2125	23.535	24.028	23.8408	22.9884	22.7469	23.4289	22.3514	0	0	0	0	0	0	0	1	2	1	1	0	0	1
28.0033	28.4621	28.1155	28.0342	27.9624	27.8217	28.1579	28.241	28.2829	28.3124	28.2311	27.9601	27.9975	28.2755	28.4562	28.202	27.9577	27.8479	30.303	30.1215	28.9128	30.0156	29.2688	29.1748	27.949	28.0042	28.7529	29.6238	29.7335	29.4047	29.1559	29.8865	29.4137	29.3097	28.9687	29.1226	11	11	13	13	12	16	17	16	14	14	15	13	16	13
20.3885	19.7524	20.2245	19.4132	19.1697	19.2606	19.928	19.869	19.0037	18.6799	NaN	18.9417	18.7093	18.809	NaN	NaN	NaN	NaN	18.1611	18.4214	18.4353	18.3941	18.3332	18.607	NaN	NaN	NaN	18.0525	18.1036	17.7896	NaN	17.9605	18.0368	NaN	18.3556	18.4246	1	0	1	0	0	0	1	1	0	0	0	0	0	0
18.0909	17.5022	NaN	NaN	NaN	NaN	NaN	NaN	NaN	NaN	NaN	NaN	NaN	NaN	NaN	NaN	19.5628	NaN	NaN	NaN	17.1828	17.3925	17.467	18.7721	18.4722	19.9773	18.1406	NaN	16.6023	17.1081	17.1145	17.9577	NaN	17.4328	17.742	17.1806	0	0	0	0	0	0	0	0	0	0	0	0	0	0
20.4641	20.9367	21.6181	20.8355	21.0996	21.4408	20.7095	20.6945	22.1811	21.0245	20.4581	20.9475	20.6964	21.155	20.2185	21.5134	20.8049	21.6386	NaN	NaN	NaN	NaN	NaN	NaN	NaN	NaN	NaN	NaN	NaN	19.4823	NaN	19.581	NaN	NaN	NaN	NaN	0	0	0	1	1	1	0	0	1	1	0	0	0	2
27.4552	27.8309	27.3367	27.4373	27.4415	27.711	27.5226	27.9077	27.1722	27.9586	27.8132	27.4576	27.7562	27.8227	27.6905	28.3304	28.4198	28.4675	25.5929	26.0562	25.5584	26.3002	26.236	26.4658	26.4862	26.8615	26.7843	25.4999	25.4353	25.7295	25.7386	25.8527	25.1733	26.3194	26.4391	26.6693	4	4	5	4	6	5	4	4	2	3	2	2	6	4
23.6337	23.4045	23.7214	23.5838	23.3691	23.1405	23.0213	22.4073	23.0115	23.0387	22.5426	23.2268	23.2706	23.2088	23.3321	23.6155	23.6282	23.611	23.0156	23.1259	22.9804	23.6336	23.3676	24.577	24.5723	24.4148	25.1625	23.5269	22.8395	23.2907	23.0801	22.7764	22.4871	23.7222	23.5841	23.8338	3	0	1	1	1	0	1	0	1	0	0	0	1	0
21.1587	19.5733	20.8928	21.8336	21.211	19.2906	19.3269	21.6565	20.0523	18.6503	19.0927	21.418	18.4291	20.2936	19.079	NaN	23.1648	NaN	17.6224	16.9524	18.2117	17.4771	17.6485	17.6496	NaN	NaN	NaN	17.9514	17.6323	18.1529	19.0093	18.526	18.6026	18.2168	18.6701	18.4322	1	0	1	1	1	0	0	1	0	0	0	1	0	1
28.8053	28.7046	28.4801	28.5455	28.6734	28.5271	28.9743	28.6335	28.5768	28.5911	28.4605	28.6889	28.72	28.5851	28.9351	28.99	29.1705	29.1491	30.1534	29.8083	29.4679	30.1888	29.4539	29.3582	29.2221	29.0638	29.2775	29.7257	29.8474	29.746	29.4682	30.0018	29.8816	29.3282	29.4595	29.4342	15	14	18	20	15	13	17	18	15	14	13	14	13	17
28.0843	28.3313	28.0395	27.7512	27.8599	27.9023	28.3143	28.1381	27.9475	28.388	28.366	27.973	28.4255	27.8075	28.2989	28.5366	28.2091	28.3158	30.065	29.807	28.7906	29.8427	29.1745	29.2735	28.4165	28.0846	28.7993	29.534	29.6509	29.4217	29.1352	29.6025	29.5875	29.1965	28.904	29.1086	15	15	13	8	12	10	13	12	9	14	12	8	16	8
28.877	28.9889	28.6502	28.3919	28.6227	28.6904	28.5359	28.5205	28.228	28.92	28.7055	28.4679	29.1702	29.0773	29.1036	29.1306	29.3889	29.2608	29.9275	29.8492	29.6655	30.0563	29.5763	29.7983	28.9614	28.556	29.4545	29.6492	29.7238	29.8591	29.6847	29.8022	29.8939	29.5601	29.6772	29.6818	10	12	6	11	9	10	8	10	10	9	14	13	14	13
23.3556	23.2949	23.0994	22.4273	22.3975	22.2661	22.8356	22.6184	22.6092	22.3697	22.7364	22.7326	22.3878	23.3499	23.2787	24.5101	24.0469	24.3867	23.0028	21.9545	21.6687	22.8282	22.0157	23.046	22.0068	22.8627	23.07	22.1524	21.9492	21.6763	22.23	22.0481	22.0791	23.8922	23.3736	23.0974	1	1	2	0	0	0	0	0	0	0	0	0	0	1
NaN	20.263	20.4214	21.1226	21.3375	19.8873	19.7419	20.2485	20.9557	NaN	NaN	19.2325	19.7865	21.4261	20.0803	22.5342	23.2719	22.4541	NaN	NaN	NaN	NaN	NaN	NaN	22.0361	21.4981	NaN	NaN	NaN	NaN	NaN	NaN	NaN	NaN	NaN	NaN	0	1	0	1	1	0	0	0	2	0	0	0	0	1
22.4106	22.2267	22.6903	22.1612	22.2134	22.6776	23.2918	22.6953	21.9151	22.8323	22.83	22.642	22.4057	22.0936	21.7078	21.3354	20.9842	21.1659	22.7773	22.1603	21.5989	18.7001	18.3474	21.9635	NaN	NaN	NaN	NaN	NaN	19.7979	18.5044	NaN	NaN	22.7351	22.5834	NaN	1	1	1	0	1	0	1	1	0	3	3	1	1	1
22.4044	22.0445	21.4281	22.0807	22.0996	22.0999	22.1446	22.2433	22.1982	22.4283	22.4804	21.8962	22.4961	22.428	22.7743	23.209	23.1183	22.955	20.1357	20.4562	19.8348	20.0329	20.2418	20.9999	21.8437	22.2672	22.5855	20.0425	20.1337	20.2822	20.6095	20.6341	20.396	20.0696	20.7426	21.9389	2	2	0	2	1	2	2	2	2	2	2	2	1	1
26.152	26.4863	26.2057	25.0759	24.5799	25.8597	25.6334	25.9749	24.653	24.2261	25.7573	25.1263	25.5824	24.3166	24.7588	25.5147	26.6393	26.2914	23.0913	23.5183	23.0767	23.4488	23.4727	23.3467	23.8595	24.3071	24.143	23.3996	23.4476	23.084	23.46	23.2634	23.1832	24.1398	23.734	24.007	5	3	2	2	1	1	1	1	2	2	4	2	3	2
20.255	20.9241	20.1818	20.7616	20.4188	20.8551	20.3451	20.6741	20.6951	20.5612	19.6863	20.6394	20.0806	20.453	20.5047	21.3039	21.4508	21.2758	20.19	20.1328	20.5781	20.4822	20.535	20.298	22.1096	22.4982	22.5336	21.254	20.8171	20.7259	20.9888	20.9311	20.4109	20.3758	21.2678	21.211	0	1	0	1	0	1	2	1	0	1	0	0	1	0
21.1508	21.2966	20.9889	20.9962	20.5258	19.9826	21.5521	21.1495	21.7878	20.8669	21.1089	21.3512	20.6066	20.8318	21.3754	21.4553	21.48	21.9485	20.5665	20.9837	20.7263	20.959	21.0253	21.1346	21.7069	21.7566	21.8232	20.7073	20.9543	20.6576	20.9522	20.9339	20.5776	20.9008	21.0875	21.3933	1	0	0	0	1	1	0	0	0	0	0	0	0	0
27.1291	27.3034	26.9863	27.5045	27.1866	27.6213	27.4324	27.609	27.4947	27.3615	27.4404	27.4791	27.2304	27.5103	27.6141	27.8991	27.8707	27.9887	28.8883	28.605	27.4247	28.5981	27.9712	27.9726	27.4096	27.5332	27.9742	28.451	28.496	28.1966	28.0398	28.4658	28.4886	28.5095	27.9388	28.222	5	8	9	9	6	9	8	8	8	9	8	10	8	8
28.2284	28.2869	27.9131	28.0088	28.0563	28.0955	28.2961	28.2886	28.0971	28.4515	28.2467	28.2299	28.1508	28.5144	28.7831	28.6916	28.186	28.5326	30.2024	29.7655	29.0111	29.8251	29.198	28.6623	27.9467	27.8473	28.4416	29.6378	29.5021	29.2247	28.9052	29.4465	29.3845	29.0303	28.7153	28.8192	9	11	7	10	11	11	10	11	9	9	8	12	10	12
21.9901	21.3674	21.2101	21.7041	23.7956	22.9132	22.6709	23.3351	21.907	21.6731	22.2687	23.3065	20.8368	20.4646	22.1411	24.2315	24.2058	24.2005	NaN	18.9777	19.7757	19.5376	19.1109	19.7248	22.8546	21.5194	21.7693	19.4896	18.9078	NaN	19.4153	19.7763	18.7461	19.9794	19.6912	20.1661	0	0	0	0	1	1	1	2	0	0	1	1	1	0
NaN	NaN	NaN	NaN	NaN	NaN	NaN	NaN	NaN	NaN	NaN	NaN	NaN	NaN	NaN	NaN	NaN	NaN	NaN	NaN	18.4789	17.7521	17.7907	22.8691	NaN	NaN	NaN	17.0199	17.3284	17.143	17.0573	16.4953	NaN	NaN	NaN	NaN	0	0	0	0	0	0	0	0	0	0	0	0	0	0
22.886	22.3106	19.5457	21.1402	21.6185	21.5758	18.6328	NaN	18.5411	NaN	19.0905	NaN	NaN	19.6934	NaN	NaN	NaN	NaN	24.7514	25.2628	25.4619	23.9232	25.5882	25.2969	26.8157	26.7833	26.9264	24.1944	24.9307	24.5206	26.6749	26.1955	24.1962	24.7122	26.0478	25.6769	1	1	0	1	1	1	0	0	0	0	0	0	0	0
26.5646	26.266	26.4273	26.2484	26.465	26.2873	26.178	27.6396	27.3466	26.2237	26.5367	25.8068	25.9641	26.8693	25.9177	25.8384	25.4074	25.305	23.0978	23.8732	26.3313	24.382	24.9794	25.2913	25.0147	25.2579	24.2235	25.1076	25.5226	25.8981	26.6979	25.9051	26.8572	24.8806	25.6932	25.5785	4	3	5	5	3	5	5	7	6	2	5	5	4	7
28.8897	28.6523	29.3427	29.0388	29.3012	29.2871	28.9018	29.8489	29.9147	28.3641	28.8399	28.3331	29.0049	29.4336	28.445	28.4739	28.3235	28.3336	26.1529	27.3441	29.3375	27.6373	28.5857	28.1063	28.4059	28.4773	27.9913	28.4279	28.8375	29.2214	29.862	29.2447	30.0058	28.4645	29.1343	28.9531	10	8	8	9	12	9	9	13	13	9	8	9	7	11
27.2357	27.2397	27.1934	27.5428	27.3581	27.5395	27.6344	27.596	27.6068	27.8946	27.3524	27.1982	27.4328	27.5904	27.6169	27.7821	27.8584	27.7761	29.4302	29.0379	28.0657	29.191	28.5646	27.7706	28.0496	27.6784	27.9815	28.8982	28.8286	28.8386	28.2911	28.6565	28.6312	28.52	28.2121	28.104	7	6	5	6	7	7	7	8	7	8	7	7	7	8
22.6095	22.9484	22.8032	22.9535	22.812	22.8282	22.9012	23.3573	23.1978	22.9053	22.0074	21.875	22.5223	23.052	22.2701	24.2142	24.247	24.1714	19.2569	19.792	19.6484	19.5711	19.6182	19.8291	21.9026	21.6756	20.6061	19.7737	19.7171	19.3402	19.2482	19.2095	18.9463	21.4823	20.8911	20.9391	1	2	3	3	1	1	2	3	1	2	1	0	1	1
21.0387	NaN	NaN	21.8817	NaN	21.6201	22.0048	NaN	20.8313	20.6387	21.0298	21.6585	21.3089	NaN	20.9182	NaN	20.3415	NaN	21.6899	21.908	21.8633	21.8214	22.1008	21.2753	20.9446	NaN	NaN	21.8569	21.5846	21.5899	21.6283	20.9627	21.4014	20.9913	21.7225	21.5656	0	0	0	0	0	0	0	0	0	0	1	1	0	0
21.2248	21.4226	20.6673	21.0378	22.5691	22.4855	21.9193	22.1372	21.3784	21.4831	21.6909	21.2214	21.6003	21.6456	21.0499	21.7738	22.0114	21.9019	23.6994	23.9262	24.3187	23.8199	23.6702	23.7696	23.4668	22.9295	23.0202	23.8418	23.9063	23.3013	22.9348	23.448	23.5963	23.4251	23.0874	23.2381	0	0	0	0	1	1	0	0	0	0	0	0	0	1
26.2644	26.0544	25.9996	25.8522	25.8665	26.0013	26.4102	25.9946	25.9359	25.8385	26.0314	25.989	25.9046	25.9056	26.2847	26.2147	26.2293	26.2245	28.6477	28.4217	27.6216	28.467	27.5902	27.6101	25.995	25.9816	26.681	27.7119	27.5933	27.7505	27.2617	28.0635	27.3341	27.1652	27.0383	27.2474	2	5	4	6	5	6	6	5	5	4	5	5	8	7
20.678	20.9739	20.5442	20.769	21.0259	21.0479	21.4201	23.76	21.8257	20.5607	20.641	20.1539	20.8908	19.9759	21.6756	23.3885	24.2709	24.3935	23.2626	24.8195	24.7961	23.8198	23.1101	21.3943	26.2447	26.0344	26.642	24.4542	24.2784	22.5824	23.499	24.0483	23.1303	25.138	25.7044	25.386	0	0	0	0	0	0	0	2	0	0	0	0	0	0
23.4531	23.7932	24.5729	23.7551	24.7726	24.2429	23.6544	23.7794	23.725	23.4639	23.8113	23.6608	23.3958	24.0585	24.8277	24.6251	24.5785	24.8435	22.5636	23.2881	22.6503	23.512	22.7151	23.2177	25.2534	25.2936	25.2122	23.0238	22.2648	22.9257	22.4221	22.2645	22.3455	23.9266	22.8971	22.7999	0	0	2	0	1	2	0	1	0	0	1	1	0	2
21.2138	20.8122	NaN	20.6028	20.2121	20.5472	20.8193	20.682	NaN	NaN	NaN	20.2968	19.8239	20.0793	NaN	20.7065	20.5786	21.1965	NaN	19.4279	19.0109	NaN	NaN	NaN	20.358	20.5508	20.4308	NaN	NaN	NaN	NaN	18.9109	18.9075	19.7161	NaN	NaN	1	0	0	0	0	0	0	0	0	0	0	0	0	0
22.9846	22.6648	23.0089	22.5575	21.8146	22.2372	21.9933	22.2401	21.4319	22.596	20.6368	22.1144	21.8285	21.5921	21.7513	20.5826	22.4998	21.7985	19.6497	19.4579	20.5577	20.1883	20.0781	20.5151	NaN	19.5615	18.6668	20.2673	19.9002	20.6214	19.7524	20.5384	20.5609	19.9708	19.8012	20.1682	1	2	2	2	1	3	2	1	0	2	0	1	2	0
NaN	20.2931	NaN	NaN	NaN	NaN	NaN	NaN	NaN	NaN	NaN	NaN	NaN	19.8006	NaN	21.1321	NaN	NaN	24.3084	24.9609	23.9286	24.6568	24.4944	23.4585	24.981	24.949	24.8066	24.8439	25.2357	23.6965	26.8654	26.5283	23.6982	24.3606	24.5252	25.3018	0	0	0	0	0	0	0	0	0	0	0	0	0	0
26.5143	26.5213	26.2017	26.7939	26.6705	26.7148	26.7772	26.6569	26.7788	27.459	26.9538	27.0651	27.1808	27.0908	27.8339	26.8178	27.5704	27.8668	28.5722	28.5241	27.6482	28.2476	27.5234	28.1964	26.9854	26.9657	27.5045	28.1937	28.2192	27.8807	27.6905	28.2399	28.1316	27.7089	27.5501	27.5212	2	2	1	3	4	3	2	2	2	5	4	2	1	3
27.587	27.4921	27.7612	27.9889	27.7396	27.557	27.5375	27.5665	27.6041	27.4302	27.6105	27.6093	27.7038	27.8971	27.6103	26.926	26.7652	26.4415	26.9925	26.913	27.4605	27.0589	27.3359	28.0162	26.0929	26.1302	25.6712	27.3829	26.9644	27.2978	26.9694	26.6501	27.3362	26.5935	26.7679	26.6002	21	14	16	17	20	18	19	21	15	17	17	18	18	21
29.2856	29.2303	29.1558	29.1192	29.0398	29.0355	29.15	28.8533	29.0029	29.4028	29.3529	29.1152	29.651	29.4249	29.3026	28.2637	28.152	27.917	28.046	27.737	28.4589	27.7389	28.2908	28.6499	27.147	27.0926	26.5435	28.3998	28.0559	28.1568	27.6301	27.5733	28.5886	27.4447	27.3449	27.1312	18	15	18	19	17	23	14	17	17	16	17	15	20	18
26.5056	26.2297	26.0478	25.516	25.6775	25.8414	25.7592	25.4303	25.9222	26.127	26.2363	25.4693	26.2677	26.4087	26.2041	24.7406	25.9235	24.8907	24.8986	24.5967	25.1189	24.2713	25.1437	24.9094	23.8035	24.0556	23.3253	24.802	24.5696	25.1848	25.2002	24.5317	25.439	24.1252	24.7082	24.7919	2	4	3	4	3	6	4	2	2	4	6	4	6	3
26.4523	26.6881	26.4103	25.7206	25.9259	26.2623	26.5486	25.8203	25.6318	26.3296	26.4225	25.9955	27.2511	26.6717	26.3141	25.2124	24.8284	24.3697	26.0535	25.6938	26.2413	26.0636	26.5417	26.2433	23.4291	23.182	23.3491	26.2433	25.9978	26.3091	25.7976	25.2622	26.3563	25.0485	25.308	25.0719	4	5	5	5	4	6	6	3	3	3	4	5	5	3
19.4346	19.6963	19.5251	NaN	NaN	NaN	NaN	NaN	NaN	NaN	NaN	NaN	NaN	NaN	NaN	22.2319	20.6848	21.0561	NaN	NaN	NaN	NaN	NaN	NaN	20.4025	19.6879	21.0758	NaN	NaN	20.2805	NaN	NaN	NaN	NaN	NaN	NaN	0	0	0	0	0	0	0	0	0	0	0	0	0	0
27.4466	27.2182	27.1572	27.1236	27.1572	26.9361	27.1613	27.2609	26.988	27.07	26.8002	26.7841	27.0644	26.8382	27.1526	27.6444	27.9137	28.2682	28.3182	27.9621	27.5351	28.3641	27.2655	27.5464	27.2358	27.3063	27.3834	27.7968	27.7114	27.6537	27.6248	27.9214	27.9384	27.4181	27.8033	27.8514	8	9	6	6	5	8	11	5	6	6	7	6	9	10
27.1856	26.9695	26.8668	26.9585	26.9794	27.0205	27.196	27.292	26.9497	27.4799	27.3838	27.2528	27.5601	27.2955	27.4647	27.889	28.5512	27.504	28.8463	28.5641	27.9043	28.8069	28.0604	28.067	27.3983	27.5797	27.4738	28.47	28.4533	28.3207	28.3213	28.5498	28.7717	28.6242	28.0775	28.1009	6	8	7	8	8	7	8	10	6	5	7	7	8	8
25.99	26.0625	25.6731	25.2061	24.4264	25.7648	25.338	25.6155	25.8327	24.5943	25.2179	25.6055	24.8359	24.5758	25.1211	26.7545	27.0147	26.746	23.6151	23.9429	23.8324	23.3685	24.2551	23.5392	25.2169	25.6073	25.1325	23.0327	23.1076	23.0995	23.579	23.9925	23.1756	23.2365	24.1073	24.5829	7	6	3	2	1	4	3	3	3	0	4	3	1	0
25.1604	25.2613	25.3689	24.7917	24.734	24.5676	25.1458	24.9597	25.5426	24.4603	24.6756	24.5977	24.4318	25.032	24.9309	25.1847	25.3299	25.0027	24.6553	25.2719	24.8312	24.7432	24.7448	24.2599	26.7066	26.7492	27.0163	23.9502	24.0047	23.888	24.4625	24.7486	24.1601	24.6659	24.381	24.6319	6	6	6	2	3	4	6	5	5	4	4	4	5	5
20.9868	21.0143	21.3046	20.2225	20.5352	20.0641	22.693	23.2191	22.6816	22.0021	23.0149	22.1808	22.6471	23.0002	22.7347	20.222	20.3885	20.47	22.7633	22.3217	22.9686	23.2824	23.1706	23.1885	22.1844	22.2464	20.8249	22.0314	22.5845	22.7758	22.8962	22.5229	22.4996	22.3839	22.9026	21.7676	0	0	0	0	0	0	3	3	2	2	3	2	5	7
19.8949	19.7643	19.9458	19.8837	19.9678	19.8417	19.8594	19.5431	19.7389	19.733	19.9342	19.8656	20.0773	19.7949	NaN	NaN	NaN	NaN	20.1241	19.9692	19.7701	20.2971	20.8596	20.0612	NaN	NaN	NaN	21.0251	20.3943	20.1969	19.9736	19.9299	20.304	19.7209	19.6587	19.9069	0	0	0	0	0	0	0	0	0	0	0	0	0	0
24.9061	24.3098	24.6381	24.3757	24.9239	24.5885	24.9077	24.9584	25.3121	24.5279	24.4143	24.9611	24.4491	24.0513	24.0682	24.6965	25.1651	24.6764	24.0779	23.5898	23.6672	23.2234	23.1963	22.9792	23.8161	24.0884	23.3187	23.4016	23.5196	23.258	23.6472	23.3671	23.8424	23.4842	23.2201	23.3875	1	4	3	2	3	3	3	4	2	2	3	3	4	1
19.8089	20.1017	20.2482	19.3682	19.07	19.6545	20.0099	19.8663	19.8005	19.9888	20.0167	19.3729	19.9836	NaN	NaN	NaN	18.9204	18.3363	NaN	NaN	NaN	19.7434	19.8429	NaN	20.0466	20.5451	20.9798	19.2736	19.0148	18.7241	18.9137	NaN	NaN	19.3401	19.7126	19.4552	0	1	0	0	0	0	0	0	0	0	1	0	0	0
20.5152	20.9068	20.785	20.5293	20.3074	19.8408	19.9479	20.3264	20.4336	20.1565	20.1106	20.3633	19.6365	19.8252	19.917	20.6106	21.7124	21.2521	NaN	NaN	NaN	19.2675	NaN	NaN	19.3167	19.5548	NaN	NaN	NaN	18.8097	19.5581	NaN	18.8178	19.8547	19.4031	19.1545	0	1	1	0	0	0	0	0	3	0	0	0	0	0
26.7924	26.7206	26.9794	27.3884	26.8576	27.179	27.1361	27.163	27.3303	27.4639	27.2938	27.438	27.2123	27.057	27.1595	26.9523	27.6625	27.4429	24.8114	24.846	26.6364	25.4317	25.7302	25.1267	26.1535	26.5622	26.4605	25.8174	25.8568	25.959	26.4916	26.4012	26.423	25.6134	26.1169	26.2174	7	2	5	5	5	7	5	7	6	5	6	6	7	7
29.8379	29.7052	30.0592	29.0989	28.9247	29.0177	29.7306	28.9982	29.1679	29.3267	28.9437	28.7601	30.026	29.3288	29.2076	28.6485	28.7013	28.4285	27.4866	27.4536	29.2753	27.2619	27.0766	28.467	26.504	26.6909	26.0534	26.929	26.8381	27.0343	27.2688	26.8082	28.0196	26.6175	26.7176	26.3445	14	15	14	12	14	11	25	11	8	13	10	11	19	13
24.4892	24.587	24.4632	24.5548	24.5011	24.4725	24.3537	24.2744	23.984	24.1493	24.0038	24.2366	24.4283	24.5713	24.663	24.2294	24.5233	24.7193	25.9159	26.4179	25.6401	25.8741	26.1335	26.2844	27.5727	27.2968	28.0124	25.6334	25.8978	25.4408	25.8647	25.8092	25.5851	26.2429	26.4489	26.6604	3	4	2	4	3	1	1	1	0	2	1	2	4	5
25.7682	25.648	26.2846	25.9684	26.0891	26.1636	26.1058	26.0701	26.3833	25.7877	26.3883	25.8554	25.844	25.8047	26.1977	25.7489	26.435	25.7585	24.7096	24.9038	24.9686	25.5938	24.8223	24.621	23.5446	24.1625	24.4338	25.4474	25.3493	26.391	25.9006	25.3845	26.0813	25.3396	25.2456	25.0981	2	6	5	4	5	5	5	3	5	1	6	3	4	2
24.8884	22.5674	22.6012	25.2802	25.7784	25.0696	23.9754	25.1896	25.2185	25.0564	24.5071	23.9965	24.9552	24.4549	24.859	25.8968	26.2362	28.1896	NaN	NaN	NaN	20.0898	19.6887	NaN	25.152	25.183	24.7312	NaN	19.6604	19.842	NaN	NaN	19.0557	18.9111	18.5222	19.2148	2	1	0	6	5	4	2	5	4	2	6	6	7	2
28.807	28.8738	28.5499	28.8431	28.6685	28.7621	28.7503	29.4924	29.046	28.9741	28.8348	28.9591	28.6983	28.7408	28.8984	30.4115	30.3873	30.3306	26.0187	26.2335	25.8391	26.2556	26.2278	26.2198	27.2953	27.4121	27.461	25.6555	25.5702	25.49	25.82	25.9311	25.4986	26.5355	26.6709	26.6741	28	27	17	25	21	25	23	28	25	24	23	24	24	23
24.597	24.7593	24.9272	24.0013	24.2276	23.8749	24.3994	24.0204	24.5548	24.3949	24.2635	24.1837	24.1178	24.0984	24.257	24.388	24.163	24.1508	23.9054	24.1571	24.0594	24.4378	24.5347	24.7799	24.837	25.4052	26.126	23.9009	23.9202	24.1132	24.3033	23.921	24.1511	24.7675	24.5847	24.422	3	3	2	0	2	2	0	1	2	0	3	2	0	1
27.5057	27.4474	27.3036	27.0817	27.0969	27.1579	27.7838	27.4459	27.2324	27.4544	27.5042	27.6668	27.2825	27.1555	27.597	27.4197	27.6982	27.2837	26.8455	26.7372	26.5774	26.5464	26.1329	26.8595	26.6507	26.274	26.3497	26.4102	26.0149	27.141	26.5591	26.4519	26.656	26.5465	26.2545	26.4194	6	8	10	6	9	9	6	6	6	7	6	7	7	6
29.3764	29.4474	29.2025	28.8246	28.8591	28.8998	29.198	29.0412	28.6503	29.0977	29.0385	28.9121	29.2943	29.0311	29.1793	29.2458	29.3129	29.4651	31.0174	30.8066	30.1462	30.9862	30.2483	30.3626	29.054	29.0827	29.4368	30.4279	30.3686	30.3902	30.0972	30.7529	30.4031	30.17	30.012	30.0574	22	22	19	16	16	20	18	13	9	19	19	13	19	15
29.1848	28.9119	28.4564	28.3699	28.4389	28.5169	28.9777	28.6371	28.2704	28.9262	28.8492	28.7208	28.9993	28.7371	28.8419	28.8441	28.5028	28.7956	30.9717	30.8624	29.8319	30.7982	29.9942	30.4427	28.6811	28.5671	29.2106	30.5501	30.2344	30.4113	29.6857	30.3408	30.4123	30.0447	29.5722	29.7092	8	7	5	8	7	7	7	10	7	9	10	8	11	5
28.5666	28.2076	27.8061	27.9383	28.0535	27.7138	28.6438	28.2589	27.9554	27.8583	28.0578	28.2049	28.2573	28.0145	28.7299	28.4684	28.8044	28.8072	29.2547	29.2175	28.5261	29.1282	28.4211	28.6258	29.0198	28.6443	29.1495	28.5793	28.6742	28.7859	28.8248	29.2287	29.4649	28.4799	28.9114	28.8102	13	12	8	8	10	7	10	7	5	10	8	8	12	10
21.7426	22.0418	21.9857	22.23	22.1677	22.1729	22.1712	22.445	21.912	21.5542	21.6692	21.5061	21.3515	21.7509	21.6664	22.0719	21.9581	22.0675	22.7865	22.1416	22.2331	22.8638	22.3205	22.2265	22.0246	21.7794	21.778	23.2161	22.8207	23.2697	23.0123	22.5896	22.3205	22.0177	22.3315	22.2116	0	1	1	2	2	1	1	1	1	0	0	0	0	0
25.4305	25.6614	25.2277	25.5721	25.9299	25.6607	25.0867	25.2657	25.5262	24.9442	24.9886	25.1547	24.9339	25.5841	25.5632	25.9443	25.9886	25.928	25.67	25.8965	26.0354	25.6916	25.9495	24.9173	27.5283	27.2094	27.4875	25.8054	25.5877	25.497	26.1353	26.1426	25.8204	25.9647	26.4122	26.6186	3	3	4	3	5	6	2	2	1	4	2	1	3	3
23.5182	24.1656	24.0016	23.8885	23.5418	24.0568	NaN	NaN	NaN	24.0174	23.5751	NaN	NaN	23.595	23.2863	NaN	23.4589	23.9619	23.8973	23.3119	23.6638	23.3331	23.0659	23.1069	23.7877	24.9289	24.555	23.5058	23.4786	23.4162	23.0863	23.4606	24.0854	22.8831	22.9109	23.5379	1	1	0	0	1	0	0	0	0	0	0	0	0	1
22.689	22.5848	21.4789	22.8728	22.9195	21.9363	21.6953	23.5218	22.6394	21.8486	21.9264	22.065	21.6216	22.2268	22.131	24.6226	24.5989	24.0306	NaN	NaN	NaN	21.0439	20.4131	21.7253	21.8199	20.9614	20.9073	20.8218	NaN	NaN	NaN	NaN	NaN	NaN	20.3199	20.3744	2	3	0	1	1	0	0	2	1	0	0	0	0	0
NaN	NaN	NaN	NaN	NaN	NaN	NaN	NaN	NaN	NaN	NaN	NaN	NaN	NaN	18.6921	19.6147	NaN	19.5254	NaN	19.6973	NaN	NaN	NaN	NaN	21.3547	21.056	22.2929	19.4741	19.6867	18.9011	NaN	NaN	19.9286	NaN	20.6121	20.3926	0	0	0	0	0	0	0	0	0	0	0	0	0	0
27.4364	27.6408	27.9949	27.8449	27.8304	27.9418	28.0904	28.4149	28.4634	27.7869	27.8175	27.9815	27.5231	27.98	27.1879	27.0293	27.0107	27.1738	26.0911	25.9041	26.0775	25.9988	26.1098	26.6835	27.798	27.794	27.4267	26.0638	25.9168	25.8654	25.792	26.0109	25.3603	26.2137	25.8351	25.7788	4	8	7	7	12	7	7	14	9	8	8	8	6	12
23.5112	24.5068	25.2114	25.2633	23.9733	24.4613	26.7031	26.5223	26.5466	25.6103	26.17	25.225	24.8973	25.6422	26.0206	21.4809	22.84	23.6896	NaN	NaN	NaN	20.6553	20.3586	18.6478	18.2605	19.8496	19.5521	20.2223	20.2882	20.951	20.6496	19.7827	19.6959	19.6293	18.676	19.4576	1	1	2	2	1	2	2	2	2	2	2	1	2	2
18.9286	19.3798	19.275	19.228	19.2617	NaN	18.6393	18.7894	18.5915	19.2411	NaN	NaN	NaN	NaN	NaN	19.1241	19.4854	20.1641	NaN	NaN	NaN	NaN	NaN	NaN	19.3448	20.0819	19.4718	NaN	NaN	NaN	NaN	NaN	NaN	NaN	NaN	NaN	0	0	0	0	0	0	0	0	0	1	0	0	0	0
31.8688	31.6415	31.7949	31.5771	31.7355	31.5951	31.5175	31.9712	32.3423	31.4065	31.8604	31.4466	31.7167	31.9172	31.4424	31.3143	31.2294	31.1733	32.2651	32.5047	32.6897	32.2075	32.1355	32.4351	32.3956	32.1976	32.0593	32.2471	32.4567	32.2839	32.9902	32.7694	32.541	32.1334	32.2672	32.2722	35	35	35	33	37	34	30	35	36	31	34	34	29	31
18.3174	18.601	18.4256	NaN	18.2937	17.5318	17.7296	NaN	NaN	17.4508	NaN	NaN	16.9231	NaN	17.2025	NaN	NaN	NaN	20.6793	22.2069	20.3291	21.2128	21.6909	19.9539	22.4171	21.918	21.1268	20.9144	21.302	20.6012	21.6986	21.4527	21.3448	21.7965	21.6426	22.1452	0	0	0	0	0	0	0	0	0	0	0	0	0	0
28.0492	27.7357	27.2932	26.835	27.1609	27.2426	28.1157	27.6615	27.5276	27.8255	27.8281	27.7668	28.0818	27.3994	27.7446	26.9577	27.101	27.3375	29.3461	28.9577	28.4667	28.8401	28.3433	28.7305	27.3779	27.458	28.1011	28.7399	28.6633	28.2636	27.8466	28.194	29.1236	27.7546	27.9119	27.6759	8	7	4	5	6	4	6	6	6	6	9	8	7	5
27.2632	26.532	25.9286	27.6257	27.572	27.1248	28.4176	27.9428	27.3728	26.5441	25.4766	28.3544	27.7749	27.0342	25.3514	26.5235	24.8829	28.857	26.5081	26.0075	25.2137	25.1289	25.6458	25.1123	26.2857	25.0721	24.9863	26.4863	26.5203	26.4279	26.6667	26.1072	26.2678	25.5363	26.0174	26.6953	3	1	1	4	2	3	3	3	3	2	3	3	3	3
17.2399	18.0957	17.601	17.4502	NaN	17.762	17.0404	17.514	18.4955	17.4548	17.1345	NaN	16.839	NaN	NaN	NaN	NaN	NaN	18.706	20.8058	21.1971	19.513	20.4657	20.5623	22.4463	22.4438	22.9684	18.5256	20.5229	18.659	18.8205	18.6424	21.1574	18.8393	21.3522	21.4309	0	0	0	0	0	0	0	0	0	0	0	0	0	0
23.2429	23.1764	22.6288	22.8991	22.6298	22.8675	22.573	22.0803	NaN	22.7943	22.2376	NaN	21.7874	20.8278	NaN	21.5508	NaN	21.4221	23.5956	22.9603	22.6886	22.8566	22.739	22.3563	23.1399	22.9298	22.918	22.7614	22.5819	22.227	22.3547	22.6439	22.2893	22.7088	22.5719	22.5618	1	0	1	0	1	3	0	0	0	1	0	0	0	0
24.9046	25.0091	24.6481	24.8	24.7104	24.9018	24.8403	25.1342	24.8532	25.1487	25.277	25.1069	25.2564	25.1321	25.0674	24.9064	24.6489	24.8005	26.5381	26.6648	26.2247	26.3704	26.3813	27.0292	27.552	27.6027	27.7468	26.3276	26.2144	26.4332	26.3602	26.4585	26.1447	26.3587	26.3186	26.2458	3	4	2	5	4	6	5	7	3	4	4	5	5	4
20.6835	20.5083	20.2681	21.094	20.8613	20.8693	20.947	20.9245	21.2839	21.2652	19.6483	20.3924	20.1794	20.96	21.1902	20.738	21.0776	20.6184	20.4123	21.3435	20.5714	21.0207	21.291	21.713	22.7595	22.2646	23.1636	20.3853	20.611	21.0924	20.4556	20.6666	20.9005	21.0254	21.1828	20.3222	0	0	0	0	0	0	0	0	0	0	0	0	0	0
30.5878	30.9491	31.4536	31.2536	31.1867	30.8543	32.5457	30.9548	31.8385	31.3962	31.4018	31.6507	31.521	31.1113	31.1273	29.9011	30.0383	30.2296	23.1744	20.3801	21.7555	22.3687	22.7395	22.5234	19.7286	17.8489	18.4125	22.7444	22.7066	21.9021	22.1679	21.9566	20.7106	22.4754	22.4692	22.4924	10	12	13	12	11	12	15	10	12	12	11	12	11	12
23.4103	23.2857	23.6926	21.129	22.0678	22.7298	NaN	NaN	NaN	NaN	NaN	NaN	NaN	NaN	NaN	NaN	NaN	17.7058	25.3981	26.3406	26.6064	26.626	27.7229	26.2246	27.6941	27.7193	26.6399	26.4469	27.4195	27.1588	27.0328	27.3857	28.6352	25.8167	27.8002	27.0663	1	1	1	0	0	1	0	0	0	0	0	0	0	0
20.7997	22.8453	21.5573	21.7439	21.0909	21.5266	24.641	24.8652	23.79	23.4757	23.5948	22.3158	21.603	22.9788	23.997	20.8901	20.9194	20.8057	NaN	NaN	NaN	NaN	NaN	NaN	NaN	NaN	NaN	NaN	NaN	NaN	NaN	NaN	NaN	NaN	NaN	NaN	0	1	0	0	0	0	2	3	1	1	1	0	0	2
23.7467	23.71	23.9816	24.0346	23.5321	23.9536	23.3541	23.2495	24.2952	23.5199	23.7921	24.2518	23.6237	24.2538	24.2574	24.5871	24.5116	24.2927	22.2053	22.5476	21.7205	22.3362	22.4856	22.5187	23.6556	23.5656	23.8057	22.0432	22.8098	22.0671	23.0828	22.6541	21.9696	23.3853	23.3448	23.5008	3	3	2	2	1	3	2	2	3	2	2	2	2	2
23.6681	24.3186	24.1998	18.5245	18.3075	18.0925	24.7242	25.7727	23.4461	23.4005	25.0707	23.6924	23.4322	22.6297	23.5419	22.2777	22.5801	22.8181	23.0694	22.479	22.1284	20.9589	22.1159	20.4098	NaN	NaN	23.1903	20.3207	19.2753	19.9944	20.0043	NaN	NaN	NaN	20.5951	NaN	1	1	1	0	0	0	1	1	1	1	2	1	1	1
26.3947	26.6505	26.7389	26.5746	28.3837	26.3277	31.4427	31.2209	31.2884	29.9015	27.436	27.2794	27.0031	26.9875	27.0262	25.5161	25.337	25.1954	NaN	NaN	16.6619	18.0867	18.0518	NaN	NaN	NaN	NaN	NaN	17.5866	NaN	NaN	NaN	16.9467	NaN	NaN	NaN	3	3	4	3	4	3	8	7	11	6	4	5	4	4
22.0675	22.7834	23.6703	NaN	NaN	18.5486	NaN	NaN	NaN	NaN	NaN	NaN	NaN	NaN	NaN	NaN	NaN	NaN	NaN	NaN	NaN	NaN	NaN	NaN	NaN	NaN	NaN	NaN	NaN	NaN	NaN	NaN	NaN	NaN	NaN	NaN	1	1	1	0	0	0	0	0	0	0	0	0	0	0
29.2341	29.5749	30.3481	30.7357	31.0994	30.5692	31.5895	31.0783	31.3499	31.4622	31.3636	31.4613	31.1456	31.5169	31.4385	30.1957	30.2208	29.8186	23.7524	24.1694	24.4313	26.4069	27.1366	25.8703	25.673	26.0385	25.6052	26.6732	26.453	26.4142	26.7618	25.8536	25.9333	26.7077	26.9214	26.5107	5	5	4	6	5	5	6	7	4	7	5	5	5	6
26.3993	26.5749	26.469	27.0055	27.0136	26.858	26.9957	26.7839	26.8303	26.6614	27.0101	26.9107	26.8831	27.1258	26.4405	31.373	31.3597	31.1265	27.3419	27.4967	28.8878	28.3889	28.8375	28.7086	27.7751	27.6686	27.6538	29.1597	29.0267	29.8006	29.6517	28.9192	29.764	31.379	31.8376	31.7423	2	3	3	4	5	3	1	7	2	2	5	6	8	5
23.0921	22.6723	22.1035	22.068	22.0701	22.155	22.6809	22.9747	21.8716	22.834	22.0351	21.7639	22.0729	20.9235	21.1001	22.043	21.7162	21.8154	22.3831	22.8398	21.6285	22.3043	22.2037	20.2132	23.9985	23.3849	23.4522	21.9802	22.3198	21.9848	21.8223	21.9492	21.8433	22.4916	22.3141	22.2031	1	1	1	0	0	0	0	1	1	1	0	0	1	0
NaN	17.424	NaN	18.8966	19.526	18.9232	19.521	19.4474	20.4413	20.9661	20.3301	20.4635	18.3997	20.7719	20.1905	18.8115	18.3498	17.3083	NaN	NaN	NaN	NaN	NaN	NaN	NaN	NaN	NaN	NaN	NaN	NaN	NaN	NaN	NaN	NaN	NaN	NaN	0	0	0	0	1	1	1	1	1	1	1	1	0	1
28.0869	28.2078	28.3492	28.2126	28.0632	28.1048	27.9973	28.1148	28.5345	28.5124	28.6497	28.6193	28.196	28.7484	28.4449	28.2389	28.3886	28.1386	31.4554	31.2309	31.4673	30.7738	30.8386	29.808	30.4928	30.7277	30.4131	30.8373	30.8733	30.5218	30.6393	30.7951	30.6152	30.4699	30.4847	30.6007	18	17	15	15	17	15	10	17	17	17	24	21	15	17
23.8304	23.8482	23.4935	23.7693	23.8927	23.7496	23.2808	23.5747	24.1551	24.0586	23.9252	24.2519	23.8302	24.0454	24.2605	24.739	24.5032	24.5308	22.2755	22.4802	23.9114	22.6682	23.002	22.972	23.1815	23.4641	23.2263	23.3494	23.5015	23.6842	24.3011	23.8433	23.7306	23.2723	23.2165	23.448	3	3	2	5	4	5	1	5	5	6	4	5	4	5
28.4339	28.5671	28.3494	28.2114	28.3441	28.1728	28.558	28.0918	28.2203	28.4882	28.5903	28.4035	28.3239	28.536	28.2942	28.1733	27.9901	27.6826	31.7296	31.3888	31.3712	31.1926	30.8346	29.6926	29.874	30.1509	29.7683	30.8945	30.8495	30.4594	30.0833	30.4786	30.32	30.0283	29.7783	29.8769	18	18	15	16	13	17	15	16	15	13	21	16	20	19
19.7664	19.5813	19.5442	19.6757	20.0014	19.4123	19.5618	19.1169	20.1673	19.8159	19.3928	19.6532	19.6919	19.6931	19.6935	19.5643	19.2342	19.9413	26.1839	25.6532	25.461	26.121	25.3884	24.5211	22.7982	23.827	23.4193	25.1094	24.5506	24.5799	23.8918	24.3932	24.4909	23.7907	23.8285	23.8175	0	0	0	0	0	0	0	0	0	0	0	0	0	0
22.5562	22.5983	22.4976	21.6154	21.9884	22.2372	21.972	22.5869	21.651	22.0897	21.8735	22.549	21.8709	22.5016	22.3419	23.4651	22.1668	23.2714	19.9076	19.8675	20.3301	19.2429	20.3924	20.3428	21.3056	20.8652	20.7841	19.8769	19.5966	19.8605	19.7493	19.5406	18.9602	20.5114	20.2661	19.9003	3	2	1	1	1	1	1	2	0	2	1	2	1	2
27.4547	27.4716	27.1903	27.3348	27.4375	27.5807	27.5201	27.5081	27.472	27.5408	27.5432	27.3937	27.9106	27.4922	27.915	28.1742	28.2812	28.3465	28.7768	28.7151	28.0489	28.7062	28.0897	27.7708	28.3293	27.9316	28.1452	28.4274	28.5275	28.2763	28.1512	28.8332	28.664	28.328	28.5344	28.2599	7	8	7	6	6	8	9	5	4	6	6	6	9	9
25.7195	25.5779	25.9256	25.7111	25.5659	25.6116	26.2923	26.2018	26.2852	25.6388	25.5932	25.5614	25.0749	25.3441	25.0318	25.3036	25.0905	25.1434	24.8989	24.9394	26.1882	25.4298	25.5329	26.4791	25.0788	25.1535	25.2231	25.6438	25.37	25.8367	25.4914	25.3948	25.0444	25.3774	25.0284	25.1946	6	8	6	7	6	9	6	11	12	6	6	7	3	8
24.8716	24.9895	25.2341	23.4093	24.1797	23.1353	24.3737	24.2895	24.3393	24.7379	25.3195	24.8234	24.8424	24.7365	24.4526	24.5525	25.1322	24.9838	23.2949	22.9362	22.1276	21.1461	20.9486	19.5574	21.6022	21.7898	25.1825	20.9013	20.9713	20.5888	21.0305	22.4966	20.5994	21.2939	20.7159	20.7021	5	7	7	1	3	1	2	3	1	3	5	4	6	4
32.675	32.7464	32.4112	33.2997	33.0302	33.0637	32.5499	34.2544	33.0912	32.6564	32.9058	32.8888	32.6945	33.2358	32.9967	33.9452	33.7005	33.6802	23.896	23.0697	23.1939	24.0922	24.0657	24.5826	29.031	29.0627	26.8733	23.7431	23.6393	23.2196	23.5151	23.1095	23.5575	24.1625	24.5735	24.4956	93	85	73	89	87	84	74	114	76	74	84	80	73	92
NaN	19.3737	19.3744	21.0481	21.2035	19.6094	NaN	20.9442	23.1846	20.0014	19.6969	21.0613	18.7694	21.99	NaN	23.3333	23.8647	24.5787	NaN	NaN	NaN	NaN	NaN	NaN	19.4971	19.2598	NaN	NaN	NaN	NaN	NaN	NaN	NaN	NaN	NaN	NaN	0	0	0	0	0	0	0	0	1	0	0	0	0	1
25.5496	25.0839	25.5578	24.0891	24.5314	24.5492	25.4563	24.7246	24.9469	25.3593	25.0821	25.2909	25.5788	25.0767	25.2141	24.7512	24.234	24.4868	22.5739	23.2296	24.2125	22.5111	22.0316	23.5432	21.2026	19.8609	19.6239	22.4576	21.7472	21.6015	22.0372	22.1579	23.8874	21.9212	22.0767	21.8514	7	4	4	2	4	2	4	1	2	5	5	3	8	5
26.245	26.295	25.408	25.3358	25.393	24.7071	25.764	24.2534	24.771	25.2084	24.5782	23.6318	25.1822	24.7221	25.0624	23.7687	23.4313	23.5994	24.5412	24.9875	23.5514	24.916	24.9506	22.1849	22.6942	21.6955	21.9397	24.5475	24.5786	25.0814	24.5103	24.6866	25.1583	24.4893	23.9598	23.0926	3	6	4	3	2	1	3	0	1	2	1	0	1	1
22.0391	21.7798	21.3703	22.0997	22.1745	21.4294	21.9561	21.597	20.7049	23.0818	22.4312	20.8198	22.061	21.9128	20.8062	21.1788	20.8474	20.8778	19.6676	19.8134	20.0989	19.4829	NaN	19.245	NaN	NaN	NaN	NaN	NaN	NaN	NaN	NaN	NaN	NaN	NaN	NaN	2	1	1	1	2	2	1	1	1	3	1	0	1	1
28.6363	28.6413	28.3542	28.3693	28.42	28.4432	28.6298	28.5353	28.3039	28.5587	28.3897	28.6624	28.4821	28.3519	28.6202	28.6777	28.921	28.959	28.9528	28.8455	28.6729	29.1642	28.7142	28.8802	28.9823	28.6324	28.8161	28.8548	28.7241	28.9833	28.5071	28.8064	28.8698	28.6316	28.5863	28.5887	25	21	16	18	20	19	23	18	17	15	19	19	22	18
20.6225	21.7261	21.7195	21.2306	21.1956	21.4108	21.7126	20.9572	21.8314	22.2856	20.6722	21.8705	23.0023	22.9288	22.7006	21.6436	21.9192	21.8557	26.5544	26.0356	25.7437	26.1211	25.5947	24.8915	23.5337	25.1851	24.4118	25.6294	26.4517	25.2123	24.7423	25.1345	26.1004	25.3632	25.245	25.6757	0	0	0	0	0	0	0	0	0	1	0	0	2	0
24.1851	24.0837	24.0434	24.1517	24.0171	24.2005	23.9719	24.648	24.4294	23.9658	24.2064	24.1873	24.0883	24.1611	24.1997	24.8681	24.8615	24.7793	22.7129	23.1564	23.6067	23.1893	23.6389	23.5566	24.2753	23.7529	24.2995	23.3558	23.5324	23.6536	24.3302	23.6569	23.557	23.8318	24.1104	24.2497	6	6	4	4	6	7	3	5	4	3	3	4	2	6
23.5637	24.3135	24.2886	22.3188	22.6099	23.5212	24.2383	24.3417	23.6283	22.4971	23.0495	21.7554	22.946	22.093	21.8378	24.7342	24.1601	24.0333	22.1572	NaN	21.8266	22.5604	NaN	21.0759	22.035	24.0027	22.6827	22.3233	NaN	21.466	21.4208	NaN	21.7312	22.1034	21.1185	21.2969	1	2	1	2	1	1	1	1	2	3	1	0	1	1
17.3921	NaN	16.3867	NaN	18.0564	NaN	18.165	NaN	NaN	NaN	NaN	NaN	NaN	17.9379	NaN	17.7002	NaN	NaN	25.2576	24.0929	22.8898	23.3434	22.9599	23.3348	25.3196	26.4151	25.397	23.9124	23.9921	23.1071	23.8587	24.174	23.3192	24.4549	24.055	24.314	0	0	0	0	0	0	0	0	0	0	0	0	0	0
23.0186	23.0182	24.5475	22.675	23.1497	21.6512	25.4004	25.0087	26.2648	22.8022	23.276	23.7979	23.0115	23.1898	23.9746	21.8769	22.9903	23.2207	NaN	NaN	NaN	19.3672	NaN	NaN	20.6086	20.2743	20.4406	NaN	19.9034	21.0955	22.2322	21.0194	20.7616	22.0023	21.4152	20.8629	1	0	1	0	0	0	4	3	4	1	0	1	1	0
23.8643	23.636	23.6533	22.8346	23.1656	23.3074	23.5536	23.2738	23.0544	23.6093	23.7136	23.1836	23.9102	23.3408	23.8993	23.5995	24.3051	24.1568	24.2008	24.5055	23.9991	23.9674	23.8305	24.0725	25.4754	25.2547	25.4214	24.239	24.0071	23.8265	24.1261	24.2353	24.3873	24.5237	24.5506	24.4018	4	2	2	2	3	3	2	2	2	2	2	2	2	2
20.4594	20.4078	20.9095	21.305	21.0798	21.4554	20.6995	20.2887	21.7769	21.5699	21.6546	22.5529	20.9443	21.201	21.6548	20.1818	20.5345	NaN	NaN	NaN	NaN	NaN	NaN	NaN	NaN	NaN	NaN	NaN	NaN	NaN	NaN	19.0598	NaN	NaN	19.0033	NaN	0	0	0	1	0	0	0	0	2	1	2	2	1	1
NaN	NaN	NaN	NaN	NaN	17.4831	NaN	NaN	17.8271	NaN	NaN	NaN	18.2881	18.339	18.2069	NaN	NaN	NaN	NaN	NaN	NaN	18.1584	18.4129	19.5197	17.8289	18.3527	18.2281	18.3759	17.8591	18.0725	18.6152	18.6065	NaN	NaN	NaN	NaN	0	0	0	0	0	0	0	0	0	0	0	0	0	0
22.0465	21.9	22.5628	22.2796	21.6647	21.7133	22.8602	22.2286	22.725	22.4868	22.4661	22.961	22.6251	23.3392	23.6779	22.2494	21.6773	21.5995	21.1879	21.2545	22.3509	21.8972	22.7863	22.6871	23.1498	23.0949	22.5353	22.6416	21.8542	22.6545	22.0962	21.7641	22.4351	22.09	21.9865	22.4024	0	0	0	0	0	0	1	0	1	0	1	1	0	1
20.2743	NaN	NaN	20.1695	20.0793	19.8514	20.5932	20.9778	20.3611	20.4766	19.9886	20.2781	20.12	20.2036	20.1581	20.4266	20.0987	20.0243	22.0451	20.6915	19.8547	21.2237	20.2764	20.2059	21.3334	21.7373	21.3516	20.6597	20.7219	20.4742	20.7542	20.4561	20.197	19.9213	19.586	19.8945	0	0	0	1	0	1	0	0	0	0	0	0	0	0
20.1348	19.8843	NaN	NaN	NaN	NaN	NaN	NaN	NaN	NaN	NaN	NaN	NaN	18.3233	18.8804	NaN	NaN	NaN	20.1524	19.3629	18.8298	19.2669	18.8998	19.805	22.6455	22.4867	22.0247	19.2837	18.7357	18.8097	19.2212	18.4715	20.5062	20.0949	19.5349	21.2354	0	0	0	0	0	0	0	0	0	0	0	0	0	0
22.8224	23.3369	22.7573	21.4327	21.4741	21.4953	21.9658	21.4862	21.3438	21.783	21.2313	21.4244	22.5528	21.2278	21.3927	21.8563	21.8093	21.7903	21.8879	21.8925	23.7792	22.464	21.4312	23.4445	20.3929	20.4511	20.4676	21.5577	21.1282	21.4629	21.0655	21.6294	22.2962	20.9385	21.0489	21.0092	1	1	1	0	0	0	0	0	0	0	0	1	1	0
22.2268	20.7205	22.1814	21.3358	21.758	21.1685	21.4852	20.3413	22.2273	22.2897	23.5909	22.5411	22.2129	22.0942	22.0511	20.244	21.4513	19.5457	26.9353	26.0354	28.1187	27.3295	27.9569	27.3828	25.3331	26.0851	26.3151	27.6322	27.5986	27.8515	26.8401	27.9319	26.6875	26.8356	27.1452	26.6932	1	0	1	1	1	1	1	0	1	2	1	1	2	1
NaN	NaN	NaN	NaN	17.1974	17.5158	17.0212	17.046	NaN	17.5741	17.3718	17.3547	NaN	17.3279	NaN	NaN	NaN	NaN	NaN	NaN	NaN	NaN	NaN	NaN	NaN	NaN	NaN	NaN	NaN	NaN	NaN	NaN	NaN	NaN	NaN	NaN	0	0	0	0	0	1	0	0	0	0	0	0	1	0
27.606	27.7015	27.2806	27.1598	27.2355	27.3552	27.8054	27.7968	27.316	27.7961	27.6067	27.5015	27.8296	27.3223	27.975	27.5733	27.6301	27.5606	29.7378	29.3643	28.8062	29.5113	28.8246	29.5459	28.0326	27.6814	28.1727	29.0121	28.8258	28.9017	28.6528	29.0173	28.9137	28.8061	28.2602	28.4846	7	9	5	3	4	9	4	8	7	7	8	9	8	9
28.0946	27.8367	27.6352	27.8856	27.9733	28.1338	28.0633	28.996	27.9478	27.4984	27.7715	27.7887	27.816	27.6325	27.8708	28.6434	28.9646	29.0213	27.4926	27.677	27.5575	27.8646	28.0245	28.2848	29.6025	29.4899	29.7116	27.4269	27.3271	27.3168	27.5254	27.471	27.2473	28.0936	28.3463	28.2802	18	20	9	14	13	16	20	33	19	15	19	18	19	13
22.0158	21.9762	21.5549	22.5726	22.5771	23.1782	22.5266	22.6268	22.2836	21.8823	22.0511	22.9404	22.5917	23.146	23.1668	22.3546	23.2838	23.2305	21.4489	21.0989	20.8084	21.3361	22.016	20.9699	21.3017	22.0495	20.831	21.1854	21.7614	21.4387	21.1668	21.1752	20.7713	21.4229	20.8062	20.8467	0	1	1	0	0	2	1	3	1	1	0	3	1	1
23.6575	23.7885	23.6132	23.3336	23.3704	23.26	23.7771	23.4423	23.7837	23.7121	23.4986	23.5425	23.5269	23.7125	23.4279	23.3095	22.9802	23.9056	25.1123	24.5452	24.1428	24.6508	24.0764	24.4706	23.815	23.7715	23.9058	24.2762	24.3375	23.8926	23.8721	24.3465	24.1355	24.2002	24.023	24.3556	1	1	1	2	2	3	1	3	2	2	3	1	1	2
23.5845	22.9447	23.8099	23.2236	23.2274	23.5805	24.1855	24.7287	24.917	27.8589	28.0384	28.0436	23.3784	23.8471	22.8832	22.6353	22.5242	22.2755	24.0381	23.2731	25.0066	24.8021	25.2174	23.1698	23.955	23.4963	24.7152	28.6524	28.1751	28.5482	25.0423	25.4441	25.0139	24.3619	23.8282	24.023	1	0	1	0	0	0	1	2	3	7	13	11	0	1
26.8275	26.714	26.7387	27.055	26.93	26.9715	27.2195	27.5161	27.0543	26.8679	26.636	26.7632	26.6615	26.695	26.6647	27.216	27.2944	27.4144	25.4321	25.5582	25.0872	25.594	25.3168	25.5648	26.046	25.94	26.1774	25.0125	25.008	24.9406	24.5571	24.7782	24.9587	25.533	25.2372	25.49	9	8	7	6	6	8	9	8	7	6	5	5	5	5
NaN	NaN	19.649	NaN	20.1635	NaN	NaN	20.607	20.639	19.8541	20.1468	20.6233	NaN	NaN	NaN	22.5844	21.7155	NaN	NaN	NaN	NaN	NaN	NaN	NaN	20.8826	NaN	20.9151	NaN	NaN	NaN	NaN	NaN	NaN	NaN	NaN	NaN	0	0	1	0	2	0	0	1	0	0	1	0	0	1
16.7029	NaN	17.26	NaN	NaN	NaN	NaN	NaN	NaN	NaN	NaN	NaN	NaN	NaN	NaN	21.8438	NaN	NaN	17.611	NaN	18.2477	17.876	16.944	19.8904	NaN	17.686	NaN	NaN	16.7651	NaN	NaN	17.0131	18.2074	NaN	16.7857	16.7598	0	0	0	0	0	0	0	0	0	0	0	0	0	0
NaN	NaN	NaN	18.1373	NaN	NaN	18.474	NaN	NaN	NaN	NaN	NaN	NaN	18.2289	NaN	18.5879	NaN	18.3546	20.3758	19.8169	21.4665	19.7271	20.4332	20.3324	18.5964	20.2101	19.1599	19.9159	19.7208	19.2201	18.9841	18.8108	19.9947	19.0344	19.2956	19.8354	0	0	0	0	0	0	0	0	0	0	0	0	0	0
19.174	19.6002	19.9552	21.0922	20.0398	20.6722	20.467	21.7156	21.992	20.2932	19.6535	19.9728	19.8436	19.7376	21.87	23.3597	22.6466	23.5384	NaN	NaN	17.3752	17.2371	NaN	NaN	18.5597	18.3545	18.0959	17.132	16.9079	NaN	NaN	NaN	NaN	16.7181	16.8771	16.7375	0	0	0	1	0	1	0	2	1	1	0	0	0	0
19.2461	18.7565	18.5937	18.837	NaN	19.5784	18.815	19.062	18.5025	19.9575	20.2847	19.7365	19.1117	19.1555	19.3665	NaN	NaN	NaN	NaN	NaN	NaN	NaN	17.603	NaN	NaN	NaN	NaN	NaN	NaN	NaN	NaN	NaN	17.8379	NaN	NaN	NaN	0	0	0	0	0	0	0	0	0	1	1	0	0	0
19.8533	NaN	20.5891	20.5578	20.5763	20.6688	20.3497	20.3238	20.2939	20.6011	20.6083	20.7013	20.4047	20.5451	20.4458	20.459	19.748	20.0173	21.5356	21.4208	19.992	20.9993	21.2641	20.0695	20.3475	22.5749	21.9764	19.8568	20.0613	20.0595	19.6271	19.8708	19.7406	19.5648	19.4237	19.337	0	0	0	0	0	0	0	0	0	0	0	0	0	0
NaN	NaN	NaN	17.6304	17.81	NaN	17.3008	NaN	17.7709	18.3895	18.5509	17.8348	18.1898	18.3083	17.5743	NaN	NaN	18.1519	19.2871	19.6368	20.2098	20.0033	20.9232	20.6912	20.139	20.5444	20.4947	19.8886	19.7699	21.178	21.0299	21.1409	21.9532	22.0051	21.1196	20.7841	0	0	0	0	0	0	0	0	0	0	0	0	0	0
NaN	18.8355	NaN	18.6374	NaN	NaN	NaN	NaN	NaN	NaN	NaN	NaN	NaN	NaN	NaN	NaN	NaN	18.908	19.7607	20.5495	19.154	NaN	NaN	19.0902	19.6083	19.8296	20.1311	19.5513	19.5871	19.3953	19.4444	19.3446	19.3226	20.9766	19.565	19.508	0	0	0	0	0	0	0	0	0	0	0	0	0	0
NaN	NaN	NaN	NaN	NaN	NaN	NaN	NaN	NaN	NaN	NaN	NaN	NaN	NaN	NaN	19.7204	19.6599	19.4525	NaN	NaN	NaN	NaN	NaN	NaN	19.4908	19.4807	19.6021	NaN	NaN	NaN	NaN	NaN	NaN	NaN	NaN	NaN	0	0	0	0	0	0	0	0	0	0	0	0	0	0
22.746	22.1002	22.2768	21.594	21.8152	21.3679	22.4402	21.8694	21.6807	22.8499	21.859	22.1233	22.3084	21.7192	21.9209	22.8877	22.7906	21.8106	23.1295	23.6345	23.1675	22.8474	22.8341	22.7273	24.2263	23.4559	23.9054	23.3554	23.0301	23.2547	23.1133	22.7053	22.779	23.4082	23.8379	23.7211	1	0	0	0	0	0	0	0	0	0	0	0	0	0
19.7276	19.7674	19.4226	19.9366	19.5142	19.1867	19.3404	18.8373	18.6832	19.5694	19.0287	NaN	19.5819	19.2322	19.5583	19.5728	19.0861	18.9447	NaN	21.0434	NaN	20.8934	20.7758	20.9005	20.5773	21.6693	21.8271	20.9371	NaN	NaN	NaN	20.735	22.3103	20.389	21.2046	21.3269	0	0	0	0	0	0	0	0	0	0	0	0	0	0
19.4778	19.5871	19.6675	19.6434	19.8413	20.0735	20.2438	20.2434	20.4155	20.4829	19.8594	20.5273	21.1097	20.7848	20.4522	20.1314	19.6353	20.4675	22.5656	22.2627	22.3539	22.8457	22.705	24.0972	25.6197	23.4468	24.5933	23.0957	23.177	22.9339	23.8745	23.5622	23.1813	22.9964	23.0971	22.7785	0	0	0	0	0	0	0	0	0	0	0	0	0	0
NaN	NaN	NaN	NaN	NaN	NaN	NaN	NaN	NaN	NaN	NaN	NaN	NaN	NaN	NaN	NaN	NaN	NaN	28.3691	28.5993	27.9271	28.0741	27.803	28.0844	26.306	25.9373	27.2357	27.4155	26.5585	26.7895	26.1246	27.5122	26.6491	27.8953	27.9513	27.7556	0	0	0	0	0	0	0	0	0	0	0	0	0	0
20.5929	22.0144	20.3404	21.1468	21.2155	20.9865	18.1635	21.0141	NaN	20.3144	20.4729	20.5196	NaN	19.811	20.4022	21.324	22.19	21.876	20.2642	19.6916	19.8072	19.8735	19.715	21.223	21.4175	21.7188	20.6947	19.7093	20.0185	20.2505	20.194	20.1842	20.2341	21.3107	21.4135	21.054	0	1	0	0	1	1	0	0	0	1	0	0	0	0
19.8755	19.5193	19.0608	18.0866	19.3532	19.216	20.0119	19.9408	19.1198	19.9819	19.9589	19.5252	19.1749	18.8346	19.0052	24.6546	22.9542	24.2529	18.4599	18.1289	18.2121	18.1826	18.2896	18.3829	19.5423	18.9224	19.406	18.0647	18.9973	18.671	19.1095	18.636	18.4923	22.9246	20.6655	22.8489	0	0	0	0	0	0	0	0	0	0	0	0	0	0
21.9658	22.0562	21.8588	22.0379	22.2795	21.9432	21.6825	21.6657	21.0951	22.3905	22.1854	22.1944	22.6002	23.3399	22.9874	21.1332	21.4418	21.0113	18.7634	18.1606	19.2528	19.2092	19.4417	21.1785	18.8299	20.306	18.7186	19.2018	19.4295	20.2887	18.7079	19.031	19.1544	19.0442	18.7181	18.7363	2	1	2	1	1	2	1	1	0	1	1	1	2	1
21.4911	22.1302	21.9866	22.5633	22.4846	22.2001	22.1473	22.0872	22.2536	22.8838	22.6676	22.3667	22.5329	22.1855	21.2449	22.2628	22.6226	22.3559	23.3312	23.4575	23.0079	23.9569	22.6359	22.0814	23.0279	20.7815	21.475	23.4664	23.4843	23.6805	22.7722	24.0867	23.421	23.0134	22.0716	23.0198	1	0	1	1	0	2	2	2	1	1	0	1	1	0
18.095	17.94	18.2171	NaN	NaN	18.0677	17.9506	18.2787	18.561	17.8381	18.0432	NaN	17.7194	17.8943	17.9449	18.3695	18.2146	18.507	17.9145	17.8557	NaN	17.935	17.97	NaN	18.0938	18.6593	20.219	NaN	18.0497	18.0637	17.7356	NaN	NaN	18.0136	18.061	18.0583	0	0	0	0	0	0	0	0	0	0	0	0	0	0
25.4253	24.0161	23.9635	24.1553	24.5228	24.2386	24.3404	24.8722	24.1921	24.5057	24.3073	24.1549	24.7059	23.9649	24.066	25.9303	25.3741	25.9723	23.8399	23.8776	23.7716	24.3514	23.7954	23.5566	24.0446	24.3703	24.8797	23.1872	23.4554	24.6886	23.7664	24.2521	24.0676	23.7082	24.3674	24.2067	2	1	1	1	4	2	1	4	1	1	2	0	2	2
23.88	23.9568	23.2771	23.4024	23.4038	23.6347	23.3923	23.9349	23.8541	23.2246	23.4991	23.4768	23.3171	23.5822	23.917	24.0802	24.0937	24.6126	22.5021	22.3251	22.2245	22.9547	22.4014	22.8937	22.6261	22.8605	23.3897	22.7882	22.1041	22.5365	22.7272	22.3485	22.0834	22.6134	22.4161	22.4718	3	2	3	3	1	3	2	3	0	1	3	1	1	1
24.8911	25.5274	26.0419	26.3774	26.3607	26.4454	26.5354	26.8554	30.6223	27.0405	26.8517	26.8297	26.3572	27.3261	26.7959	26.266	26.6621	25.7904	24.2066	24.4526	23.5431	23.8472	23.4171	25.1777	24.3862	26.0539	26.0868	22.6445	23.1091	23.0712	22.9663	22.9787	23.0913	23.3058	23.7324	23.8011	0	0	1	0	0	1	0	0	0	1	0	0	0	0
20.1716	19.1552	19.8599	20.1552	19.9112	19.9308	19.5963	19.4514	20.0179	19.8961	17.3544	20.4173	19.0297	19.677	21.0896	21.7297	21.8253	20.4963	NaN	NaN	NaN	NaN	NaN	NaN	19.5685	19.35	19.2494	NaN	19.28	NaN	18.0929	NaN	NaN	NaN	19.1657	19.7143	0	0	0	0	0	0	0	0	0	0	1	1	0	0
22.1337	22.4356	NaN	22.4631	22.071	21.2737	20.2421	21.6591	21.8957	21.1262	21.6149	20.7368	NaN	21.4192	21.7582	22.1993	NaN	22.4975	20.3379	19.4557	20.9109	20.9758	21.6238	20.7297	NaN	18.3823	NaN	21.216	19.9269	21.2532	20.169	20.8499	22.0602	20.6197	19.5972	19.8544	1	0	0	1	0	1	0	1	0	1	2	0	0	0
23.5485	23.1925	22.8769	22.5032	22.8831	22.7483	22.4296	22.0369	22.0241	22.5909	22.8809	22.3914	22.3302	22.0127	22.4117	23.0415	23.1184	23.4556	21.4941	22.5561	22.2136	22.1863	22.0985	22.8667	23.4615	23.0473	23.3695	22.0144	21.7454	21.9097	21.4775	21.6423	21.7725	22.5389	22.5509	22.6261	2	1	0	1	2	1	0	0	0	0	2	0	0	0
22.8935	23.2717	22.8401	22.3435	22.3115	22.9499	22.7317	22.8807	22.3285	22.4056	22.6009	22.6743	21.9991	22.3869	22.4928	21.9517	22.6315	21.4529	19.9086	22.0821	20.2038	20.4663	20.232	20.5998	20.9806	20.2001	20.5328	20.1898	20.0903	20.0777	19.8972	19.9869	20.5417	NaN	19.7922	19.9218	4	4	3	1	1	2	1	2	2	1	2	1	1	1
20.1581	20.4241	20.237	19.8446	19.6975	20.2024	19.6643	19.2749	19.2605	19.6952	20.2582	20.3415	19.4824	19.5952	19.288	20.1604	20.272	20.8203	19.3384	19.9433	19.3741	20.6699	19.6519	19.69	21.846	22.0876	21.524	19.6359	19.4223	19.499	19.2179	19.6675	19.1518	21.3803	21.6174	21.3733	0	0	0	0	0	0	0	0	0	0	0	0	0	0
28.5505	28.143	26.9736	28.2192	27.937	28.0662	25.1435	27.2638	28.0262	27.1687	26.274	26.7739	26.5199	27.7245	26.0946	28.7118	28.1463	29.5818	NaN	18.7401	NaN	NaN	NaN	NaN	24.7787	23.8119	23.1886	17.1673	16.945	16.6837	18.5339	17.4088	18.7126	16.8668	18.2779	17.7965	16	13	10	16	19	19	5	9	13	8	7	14	8	12
20.1327	20.1675	20.1624	19.8237	19.5317	19.5494	19.3939	19.8472	20.7035	19.1688	19.4567	19.3722	18.7838	19.8895	19.3195	20.4203	20.2577	20.4584	21.4305	20.7655	21.9674	20.4812	20.57	21.9073	22.6791	23.0372	24.3184	19.8171	19.4082	20.9548	20.5731	19.8956	20.6172	20.2244	20.4697	20.7024	0	0	0	0	0	0	0	1	0	0	0	0	0	0
24.8578	24.6054	25.2853	24.151	24.5151	24.6988	24.8086	25.2196	24.3995	24.8415	25.0016	24.9781	24.6969	25.3176	24.9592	23.8626	24.1268	23.8682	26.324	27.0623	25.8125	25.9093	26.0746	25.8201	26.9063	25.4428	27.1793	25.7597	25.7857	25.6115	25.1617	25.7351	25.0603	26.5727	25.8343	26.229	2	1	1	0	0	1	1	1	0	0	0	1	1	1
19.1189	19.3351	20.1015	18.6403	18.5871	18.7151	18.1469	19.4534	19.374	19.1067	19.0976	18.9314	18.6291	18.5777	18.4052	18.4547	18.5477	18.2666	18.2041	18.121	17.723	17.8075	NaN	NaN	18.1628	18.5473	18.647	NaN	NaN	18.2501	18.0307	17.9591	NaN	18.4782	17.7968	18.1906	0	0	1	0	0	0	0	1	0	0	0	0	0	0
19.513	20.262	19.5218	19.6305	19.3553	19.7298	19.7889	19.534	19.3369	19.7468	19.7397	19.5914	20.9516	19.9399	20.5206	19.863	21.8321	19.8702	19.3884	18.9887	18.6758	19.3133	18.7902	NaN	NaN	18.9206	19.196	18.7193	19.7985	18.6205	18.4792	18.9209	NaN	18.9451	NaN	NaN	0	1	0	0	0	0	0	0	0	0	0	0	1	0
NaN	NaN	NaN	NaN	NaN	NaN	NaN	NaN	NaN	NaN	NaN	NaN	NaN	NaN	NaN	NaN	NaN	NaN	18.6877	NaN	19.9145	18.2712	18.6156	NaN	18.0908	NaN	NaN	18.8441	19.7718	18.7591	NaN	NaN	18.3212	NaN	NaN	NaN	1	1	0	0	0	0	0	0	0	0	0	0	0	0
20.5074	19.9363	19.8115	19.7832	19.4503	19.3679	18.9238	18.2251	20.5262	18.7151	20.0265	18.9863	18.7269	20.3015	19.4141	19.6767	19.296	20.4052	24.9278	25.1781	24.4679	24.5391	23.9832	23.3038	25.6968	25.4115	25.8401	24.2215	24.5575	23.8209	24.8063	24.3341	23.7617	24.1697	24.0651	24.0025	0	0	0	0	0	0	0	0	0	0	0	0	0	0
30.8398	30.9455	31.1232	31.0636	31.1232	31.0716	30.9811	30.7826	30.9412	31.0652	31.0002	30.9923	30.8902	31.0339	31.1543	31.1875	31.1777	31.1684	29.9683	30.4933	30.541	30.4788	30.3663	29.9242	31.4005	31.5331	31.5982	30.2108	30.0539	30.1405	30.113	30.4106	30.3789	30.3119	30.7803	30.7599	29	28	30	26	30	25	28	27	23	31	29	26	28	25
20.4238	NaN	NaN	NaN	NaN	NaN	NaN	NaN	NaN	NaN	20.0956	NaN	NaN	19.8157	19.9388	NaN	NaN	20.2818	NaN	NaN	19.7835	NaN	19.491	19.8837	20.5837	20.4446	21.4036	NaN	NaN	19.7451	18.9595	18.7183	19.9706	19.6608	19.3949	19.4386	0	0	0	0	0	0	0	0	0	0	0	0	0	0
29.0251	28.7768	28.4165	29.3667	29.3422	29.1943	29.1405	28.9294	29.0077	29.1776	28.8265	29.1636	29.1385	29.1441	29.4135	29.5828	29.6813	30.0802	31.0241	31.0955	30.4082	31.0565	30.2547	29.9434	32.3165	31.947	31.9924	31.0287	30.9846	30.3951	30.7789	31.1466	30.9874	30.9051	31.2497	31.0948	12	11	11	11	11	14	13	12	10	13	12	15	15	11
23.2704	23.7496	23.9351	24.0666	23.7931	24.2897	21.1813	18.4637	21.4125	22.2558	20.8561	23.4563	20.4782	22.1457	21.6081	18.7156	20.3336	19.2948	27.2117	27.7144	26.298	26.9875	27.556	25.615	25.4042	25.1991	24.6905	26.4445	27.3282	27.7002	26.0543	26.6298	27.1646	26.4917	26.7907	25.2656	1	0	1	0	0	1	0	0	1	0	0	1	0	1
22.2102	22.4127	22.8765	23.0781	23.3303	22.6084	23.2094	23.8	23.0526	23.6359	22.3902	23.1795	22.0474	22.9968	22.9204	23.7762	24.4372	24.0639	22.299	22.5304	22.3727	22.5431	22.4572	23.0164	25.1249	25.3789	25.3932	22.3753	22.4685	22.2353	21.9965	22.3314	22.1416	24.2315	24.0614	24.2877	0	0	1	1	0	1	0	1	2	1	0	1	0	1
NaN	NaN	18.709	NaN	NaN	NaN	NaN	NaN	NaN	NaN	NaN	NaN	NaN	NaN	NaN	18.1859	NaN	18.4277	19.4395	NaN	19.4318	NaN	NaN	NaN	22.4067	21.6776	19.9496	19.6843	19.7898	19.3717	19.1792	NaN	NaN	NaN	19.4566	19.3579	0	0	0	0	0	0	0	0	0	0	0	0	0	0
22.0661	22.0538	22.1828	22.5324	22.3833	22.3152	22.0876	22.1765	21.0857	22.0537	21.3898	21.5388	21.7886	21.6857	21.7414	NaN	22.321	21.6971	19.6595	19.9209	19.5829	19.8606	20.2619	NaN	21.6287	20.1765	21.7418	20.1153	19.7871	20.3646	20.1999	20.3508	20.0506	20.7854	21.176	20.5143	2	1	1	1	1	1	0	1	0	1	1	0	0	0
26.5522	26.4551	26.5256	26.559	26.6851	26.7655	26.7966	26.5248	26.4215	26.9406	27.2189	26.9083	27.1704	26.9744	26.8722	26.4495	26.3091	25.9475	26.2656	25.8161	26.2464	25.9156	26.3312	26.6636	24.3713	24.293	23.7098	26.4888	26.3634	25.8105	25.7022	25.2658	26.7475	25.8694	25.268	25.1022	9	8	7	9	7	9	8	6	7	9	9	8	7	9
20.9354	20.5559	21.1238	22.9661	22.6741	21.6686	23.0628	22.021	22.9415	22.7181	22.057	22.7169	21.9782	23.6021	22.8801	NaN	NaN	21.5575	NaN	NaN	NaN	NaN	NaN	NaN	17.431	NaN	NaN	NaN	NaN	NaN	NaN	NaN	NaN	NaN	NaN	NaN	1	0	0	2	2	2	3	0	2	1	0	1	1	2
20.4217	20.494	20.9004	20.8081	20.6393	21.052	20.9771	21.3054	21.3671	20.6022	20.6301	20.2353	20.348	20.4238	20.6121	20.4504	20.7316	20.4491	NaN	NaN	NaN	19.1493	NaN	NaN	20.1484	19.7877	19.3791	NaN	NaN	NaN	19.3633	NaN	NaN	NaN	19.4907	NaN	0	0	0	1	1	1	0	1	0	0	1	0	0	0
21.9564	22.4455	21.7802	21.5301	21.4253	21.8543	21.578	21.036	20.7509	21.9326	21.6585	21.3641	21.8219	21.0849	21.3281	21.8719	21.9013	22.215	21.0234	21.1877	21.5749	21.6127	21.296	22.4438	22.2306	22.4897	22.8692	20.7738	20.6612	20.7622	20.5167	20.7129	20.974	21.1065	21.6579	20.9847	0	1	1	0	0	2	0	0	0	2	2	0	1	1
NaN	NaN	NaN	NaN	NaN	NaN	NaN	NaN	NaN	NaN	NaN	NaN	NaN	NaN	NaN	22.2276	22.355	22.4653	NaN	NaN	NaN	NaN	NaN	NaN	NaN	19.9319	20.7522	NaN	NaN	NaN	NaN	NaN	NaN	NaN	NaN	NaN	0	0	0	0	0	0	0	0	0	0	0	0	0	0
22.1772	21.7456	21.8265	23.3774	23.0805	22.4861	23.0245	21.9318	23.1307	23.4983	22.2996	23.1298	24.2524	22.0415	22.8087	20.9742	NaN	NaN	20.8795	20.4815	21.5364	21.2327	21.4685	21.2845	21.766	21.3814	NaN	21.4075	22.0076	23.8099	23.7232	23.3585	23.6417	21.9149	21.8317	20.8916	0	0	0	1	1	1	2	0	1	2	0	1	1	0
20.651	21.0619	20.5125	20.9424	21.0605	21.0752	20.426	20.4069	20.6201	21.6388	22.1653	20.9938	21.4037	21.1338	21.4828	22.1355	21.3519	22.728	21.5947	21.8614	21.7631	21.8466	21.3065	21.6796	23.0028	22.3124	22.2292	22.0698	21.6122	21.8366	21.5763	21.2116	21.464	21.9378	21.175	21.3178	0	1	0	1	0	1	0	2	1	1	1	0	1	0
NaN	NaN	NaN	NaN	NaN	NaN	21.4078	20.8464	20.8725	20.9153	20.8857	21.14	NaN	NaN	20.5489	NaN	NaN	NaN	21.9642	21.5875	22.4107	21.9122	22.0455	23.3652	24.2274	24.2743	25.1408	22.0444	22.149	21.8991	22.0225	22.1221	21.9204	22.7922	22.7633	22.5705	0	0	0	0	0	0	0	0	0	0	0	0	0	0
19.4499	19.1877	NaN	NaN	NaN	NaN	NaN	NaN	NaN	NaN	18.2677	NaN	19.274	NaN	NaN	NaN	NaN	NaN	22.3909	20.4942	21.7752	21.1971	20.9204	20.2547	19.6883	20.1582	19.2841	21.7266	21.349	20.0982	21.1819	21.286	20.6049	19.5778	19.8016	19.6182	0	0	0	0	0	0	0	0	0	0	0	0	0	0
21.4123	21.2439	21.6431	21.8256	21.8473	21.7472	21.2978	22.1418	21.7381	21.7074	21.9277	NaN	22.0849	NaN	NaN	25.9137	25.8308	25.8392	21.3883	21.6557	21.3236	21.3288	NaN	NaN	21.8698	NaN	21.8607	20.8066	NaN	21.3245	NaN	NaN	21.6501	24.3257	23.6469	NaN	0	0	0	0	1	0	0	0	0	0	0	0	0	0
17.4311	16.9365	17.5997	17.391	17.9008	18.3218	17.8735	17.0188	18.2878	17.5907	17.695	17.7555	17.6811	17.7425	NaN	NaN	17.8879	NaN	19.0221	21.362	21.7462	21.1987	21.1065	23.8842	18.519	NaN	19.257	20.7566	19.2657	21.106	20.196	18.9321	21.1881	21.9771	21.4377	21.2453	0	0	0	0	0	0	0	0	0	0	0	0	0	0
NaN	NaN	NaN	NaN	NaN	NaN	NaN	NaN	NaN	NaN	NaN	NaN	NaN	NaN	NaN	NaN	NaN	NaN	18.2043	NaN	17.979	NaN	17.6606	NaN	NaN	NaN	NaN	18.1035	17.7748	18.0605	18.3457	18.139	18.2578	18.0317	17.2153	NaN	0	0	0	0	0	0	0	0	0	0	0	0	0	0
27.026	26.9775	26.7013	26.9707	26.9401	27.1222	27.2016	27.7682	26.9211	27.3059	27.3217	27.0649	27.0871	26.9125	27.1471	28.2513	28.323	28.3932	24.4162	24.9496	23.9675	24.7771	24.7247	25.1968	25.7595	25.2701	25.7661	24.5037	24.3352	24.0353	24.0239	24.4982	24.0498	25.8109	25.3654	25.2551	7	9	5	9	8	8	6	11	7	5	7	9	8	7
NaN	NaN	NaN	NaN	NaN	NaN	NaN	NaN	NaN	NaN	NaN	NaN	NaN	NaN	NaN	19.9392	NaN	20.3356	20.1539	20.1834	20.1343	20.0015	19.7145	19.4905	20.8008	20.4598	19.8996	20.3232	19.9852	19.8211	19.569	20.1667	19.9499	19.7348	20.092	20.1061	0	0	0	0	0	0	0	0	0	0	0	0	0	0
25.3293	22.7293	24.7361	24.2886	24.7879	24.9996	19.3716	20.6053	19.7952	21.2906	22.4151	21.6451	25.5551	20.7099	23.03	NaN	NaN	NaN	20.4278	NaN	NaN	NaN	NaN	NaN	NaN	NaN	NaN	NaN	NaN	NaN	NaN	NaN	NaN	NaN	NaN	NaN	1	0	1	1	2	2	0	0	0	0	0	0	2	0
24.6778	24.7769	24.5941	25.0741	25.2438	24.7527	25.3133	24.8493	24.3677	25.125	24.602	24.2563	24.4659	24.0842	24.4379	22.6098	23.5905	23.261	24.3936	23.6745	24.3104	24.9435	24.6502	23.8479	22.5289	23.6242	23.4826	24.9825	24.5595	24.1232	24.2234	23.8388	24.4039	23.6768	24.1082	23.8998	2	5	3	3	3	1	4	3	1	3	3	3	3	2
22.0716	23.4601	24.3049	25.2279	25.6533	24.7957	24.2285	23.8169	25.793	26.1284	25.0293	25.4241	23.1921	24.9713	24.3246	23.6452	23.9662	23.15	NaN	NaN	NaN	NaN	NaN	NaN	NaN	NaN	NaN	NaN	NaN	NaN	NaN	NaN	NaN	18.0145	NaN	NaN	1	2	1	6	5	5	2	1	7	6	4	5	1	2
NaN	NaN	NaN	NaN	NaN	NaN	NaN	NaN	NaN	NaN	NaN	NaN	NaN	NaN	NaN	NaN	NaN	NaN	NaN	NaN	NaN	18.3587	18.4118	NaN	NaN	NaN	NaN	18.4541	18.6851	19.2051	18.9211	18.7481	19.446	19.2139	18.0245	18.6338	0	0	0	0	0	0	0	0	0	0	0	0	0	0
21.336	22.3733	21.1378	21.3734	20.8735	20.6783	20.5003	20.615	21.7728	21.5164	21.4227	21.8646	20.5143	21.4442	21.9567	22.1328	21.6131	22.0643	23.9448	24.5286	23.9999	24.273	23.8409	24.7976	25.7539	25.3063	25.0728	24.029	23.898	23.9008	24.004	23.9959	23.9775	24.4942	24.5071	24.6501	1	1	1	0	0	0	0	0	1	1	0	1	1	1
20.5898	20.2491	20.5779	21.2908	21.2292	21.4376	21.1845	21.5067	22.0413	22.4671	22.3445	21.1059	21.0712	21.6846	22.1692	20.5529	20.1418	20.4161	20.9596	21.2816	20.8846	21.1214	20.7004	22.4926	20.7605	NaN	20.4193	21.0243	20.4363	22.9117	20.8207	21.3439	21.0068	20.7427	21.2064	20.8339	0	0	0	1	0	0	0	0	0	2	1	0	0	0
NaN	NaN	NaN	NaN	NaN	NaN	NaN	NaN	NaN	NaN	NaN	NaN	NaN	NaN	NaN	NaN	NaN	NaN	20.1191	19.8814	20.4701	19.0138	18.8864	20.6719	19.8831	19.9523	19.2788	22.6177	22.4089	22.5534	18.6669	18.6143	18.4309	19.3846	18.7877	19.2751	0	0	0	0	0	0	0	0	0	0	0	0	0	0
21.0028	20.4319	21.4661	21.6123	21.6179	21.8383	21.4991	24.6021	22.9629	20.8173	21.1652	21.7412	23.0261	20.9468	21.6122	23.0704	24.7682	23.5751	NaN	NaN	NaN	NaN	NaN	NaN	21.889	20.8259	21.2739	NaN	NaN	NaN	NaN	NaN	NaN	NaN	NaN	NaN	0	0	0	0	0	0	0	2	1	0	0	0	1	0
23.5934	23.7194	24.0931	22.8204	23.3159	23.3992	23.8034	23.2389	22.2377	22.4884	23.0953	23.5393	23.2953	22.5572	23.2373	24.0314	24.0745	24.4484	19.8297	19.552	20.7639	20.5992	20.4767	20.8605	22.0721	23.0434	22.1146	20.9966	20.6318	20.5494	20.915	20.5391	20.6475	22.5709	22.9441	22.5623	2	3	2	1	2	1	1	1	0	1	1	1	1	1
29.3791	29.5002	29.5109	29.2441	29.2542	29.2762	29.3123	29.201	29.6491	29.4185	29.4916	29.74	29.406	29.5289	29.4671	29.753	29.8641	29.6877	27.7361	27.9619	29.1857	28.0975	28.4069	28.6843	28.8444	28.6042	28.4597	28.3665	28.5147	28.6494	29.0936	28.8874	29.0127	28.221	28.5151	28.7092	54	47	48	42	44	47	42	45	44	44	49	56	58	50
19.3719	19.5058	19.211	18.9931	19.1699	19.1278	18.5634	18.538	19.2839	19.0508	19.2988	19.1657	19.0051	19.55	18.939	19.3179	18.7573	19.1234	19.2184	18.4028	18.6999	19.1011	18.8079	19.3163	19.6669	21.0217	21.0421	19.1906	19.0519	18.967	19.0106	18.9755	17.847	18.9214	18.8631	18.9442	0	0	0	0	0	0	0	0	0	0	0	0	0	0
18.8496	19.5349	19.0158	NaN	NaN	NaN	NaN	NaN	NaN	NaN	20.3349	21.0383	NaN	19.054	NaN	19.4425	NaN	NaN	20.6639	20.0613	19.9104	21.4706	20.0776	22.3728	21.2085	22.0868	22.8892	20.5127	20.3057	20.1502	20.1598	20.8493	20.736	21.2774	21.268	20.3461	0	0	0	0	0	0	0	0	0	0	0	0	0	0
20.1639	20.599	21.058	20.1117	20.2258	20.1879	20.237	19.7256	21.2508	20.0737	20.0615	20.5636	20.0281	19.4214	19.9405	19.4978	20.1123	20.6925	NaN	NaN	NaN	NaN	18.9645	18.1121	NaN	NaN	NaN	NaN	NaN	NaN	NaN	NaN	NaN	NaN	20.1462	NaN	0	1	2	0	0	0	0	0	1	0	0	0	1	0
20.1711	20.3597	21.4365	20.5816	20.6896	19.8291	21.4579	19.9032	19.641	20.101	20.1279	20.0427	19.8809	21.3207	NaN	NaN	19.7867	NaN	20.8566	20.1817	19.8521	20.0774	19.8105	NaN	NaN	NaN	NaN	19.8198	19.7199	20.1512	18.9192	19.723	19.2881	NaN	18.8067	18.6128	0	0	1	2	2	0	1	0	0	0	0	0	0	2
30.3001	30.312	30.2501	31.2891	31.1061	31.2319	24.8712	25.7449	26.0008	29.5543	29.2445	29.4042	30.1269	29.7465	29.1406	27.1141	27.1409	26.7493	24.131	24.9244	24.7314	24.9803	25.7397	25.2587	26.519	26.484	26.1774	24.7686	25.3503	25.2901	26.0247	25.4752	26.048	25.2644	25.9429	25.6846	13	14	12	13	16	13	2	4	5	14	10	9	14	12
NaN	NaN	NaN	18.7874	NaN	18.7346	NaN	19.0416	18.9903	18.365	18.1714	18.7137	18.744	18.2648	NaN	21.602	20.4612	22.1602	NaN	NaN	NaN	NaN	NaN	NaN	NaN	20.4406	20.2565	NaN	NaN	NaN	NaN	NaN	NaN	NaN	NaN	NaN	0	0	0	0	0	0	0	0	0	0	0	0	0	0
21.4183	21.1721	20.5279	19.5543	19.6775	19.9381	19.6359	19.8594	21.5086	19.877	21.1108	NaN	19.8386	NaN	NaN	19.6762	19.4265	19.6281	23.939	24.4061	23.7171	22.2654	22.5011	24.4118	24.1131	23.5309	24.5903	21.3018	21.5739	22.9263	22.5383	22.4276	22.0765	22.6973	21.8441	22.1346	0	0	0	0	0	0	0	0	0	0	0	0	0	0
30.453	30.4832	30.864	30.9559	30.7469	30.8146	30.9972	30.1554	30.7219	30.8257	30.8075	30.8388	30.7858	30.8963	30.9899	29.9682	29.9086	29.9093	22.4938	22.0513	22.4148	22.0617	22.7872	22.2561	20.9675	21.217	19.567	21.9589	22.1242	21.6437	21.9623	21.7255	22.3561	22.4046	23.0197	22.1283	3	4	4	5	3	5	4	3	4	3	3	5	3	5
NaN	17.6383	17.7582	NaN	NaN	NaN	NaN	NaN	NaN	NaN	NaN	NaN	NaN	NaN	NaN	NaN	NaN	NaN	25.1912	25.531	25.8568	27.5455	26.8948	26.1011	25.3255	24.9111	24.8879	27.4964	27.8174	27.7967	28.5359	28.0793	29.1039	27.8774	28.2762	28.0331	0	0	0	0	0	0	0	0	0	0	0	0	0	0
25.2911	24.6775	25.3423	24.3603	24.0151	23.7676	23.9675	23.6365	23.5711	23.182	23.2647	22.8619	23.212	22.5105	22.607	22.4002	23.6339	23.2202	NaN	NaN	NaN	NaN	NaN	NaN	NaN	NaN	NaN	NaN	NaN	NaN	NaN	NaN	NaN	NaN	NaN	NaN	6	6	5	1	0	2	2	1	1	0	1	1	2	0
20.1678	20.4898	20.6587	20.25	19.7876	20.1768	NaN	NaN	NaN	19.9419	20.0479	20.6076	20.2547	19.9843	NaN	19.5242	20.0562	19.9935	20.2242	20.2085	19.7387	19.9045	20.1408	20.5965	21.4245	21.8819	22.0892	19.0695	19.6293	19.5064	20.2281	19.5974	19.8788	20.1602	20.1376	20.5356	1	0	0	0	0	0	0	0	0	0	0	0	0	0
24.9605	24.7348	25.3084	25.2207	25.4862	24.8781	25.1289	25.2414	25.7765	25.6676	25.514	25.6889	25.497	26.0275	25.3666	25.0234	25.2941	24.9164	28.3228	28.0948	28.3105	27.9788	27.8929	26.998	26.8412	26.9517	26.3518	27.7551	27.5782	27.3933	27.339	27.481	27.381	26.9237	26.9144	26.8465	1	0	0	1	1	0	1	0	0	2	2	3	0	3
19.1712	18.9402	19.2007	19.6632	19.4835	19.5245	19.6433	19.3635	19.9486	NaN	NaN	19.6667	19.1074	19.4095	NaN	19.5161	19.6236	19.5934	NaN	NaN	NaN	NaN	NaN	NaN	NaN	20.7179	20.0443	NaN	NaN	NaN	NaN	NaN	NaN	NaN	NaN	NaN	0	0	0	0	0	0	0	0	0	0	0	0	0	0
22.8727	23.2363	22.0464	21.9487	22.2047	21.927	21.8531	21.6386	21.7331	22.2461	21.2343	22.3214	21.678	21.5521	21.5877	20.1459	22.0887	19.4676	23.4495	23.9582	23.996	24.0145	23.3255	22.7584	20.2817	NaN	NaN	23.0894	22.7705	22.6118	22.5453	22.4493	23.2935	22.5027	21.9507	22.0375	1	1	0	0	1	0	0	0	0	1	0	0	0	1
20.9834	20.798	NaN	NaN	NaN	NaN	NaN	NaN	NaN	NaN	NaN	NaN	NaN	NaN	NaN	NaN	21.3665	21.6673	21.9935	21.9506	22.8183	22.1106	21.7987	22.77	22.3646	NaN	NaN	22.5178	21.9161	21.6547	21.8276	21.2889	22.2983	21.857	22.1871	22.2672	0	0	0	0	0	0	0	0	0	0	0	0	0	0
23.1041	23.1224	22.6786	23.9246	23.2788	24.5155	23.7797	23.8696	23.6859	23.9033	23.4785	23.9988	23.7853	23.7465	23.7051	23.5658	24.9132	24.7074	21.6512	21.8101	21.6999	22.9055	23.0555	23.0772	24.192	24.7792	24.4315	22.8994	22.8886	22.9544	23.031	23.0805	22.6353	23.1875	23.173	23.3715	2	2	0	2	1	2	2	2	2	1	1	0	3	1
19.2226	18.7876	18.9047	18.6525	19.1806	19.1026	19.3275	19.8436	19.1385	19.4378	19.6137	19.7123	19.4489	19.1973	19.6066	20.49	23.5437	23.1219	18.6268	19.2064	19.1525	18.8123	18.8527	18.553	22.1649	22.1995	20.5202	18.6861	18.7758	18.3112	19.0432	18.8903	18.9625	18.9941	19.2094	19.1629	0	0	0	1	0	0	0	0	0	0	0	0	0	0
19.9708	20.269	20.674	21.1014	20.3857	19.7972	20.5146	20.4464	20.5441	20.0119	19.1854	20.801	20.1667	20.5015	20.5139	20.3453	20.2613	20.0376	20.821	20.5646	19.9613	20.7869	20.036	NaN	19.8727	NaN	NaN	20.5926	21.0028	20.2352	20.1227	20.3942	20.43	20.3235	20.2768	20.4417	0	0	0	0	0	0	0	0	0	0	0	0	0	0
19.7388	19.7796	NaN	19.7024	19.3973	19.624	20.5438	20.1651	20.1145	20.4803	19.7349	NaN	20.6398	20.2332	20.2667	NaN	NaN	NaN	25.7328	24.9116	24.6388	23.4764	23.528	24.6624	22.4332	22.5872	22.353	23.2512	22.8761	22.5864	23.0227	22.4594	24.2753	22.4254	22.0215	22.6188	0	0	0	0	0	0	0	0	0	0	0	0	0	0
22.9256	23.0615	22.2442	22.2689	22.488	21.9237	22.4923	23.1688	22.9517	22.6859	22.2664	22.0891	22.2866	21.6749	22.0741	23.2974	23.3376	23.3088	21.1482	21.078	21.338	21.3138	21.2856	22.3895	23.4759	22.8644	23.0477	20.9989	20.6366	20.7084	20.8438	20.6942	20.7442	22.0038	22.0862	22.1282	2	2	1	0	1	0	1	2	1	1	1	3	2	0
27.0716	28.0339	28.1515	28.7656	28.9209	28.574	29.8168	29.5394	30.0888	29.1036	28.9505	28.0895	28.6262	29.1273	29.1443	27.6067	27.6086	27.3263	17.9065	13.8843	NaN	18.8022	23.6436	20.7832	17.1018	19.6447	18.4406	16.7553	18.9979	17.6441	18.8766	20.4575	19.4523	20.7973	18.7459	17.788	10	13	12	17	14	18	22	20	18	19	17	14	14	20
21.3907	21.1116	21.7802	21.0495	21.1374	20.4137	20.6752	20.1668	21.4791	20.7421	19.6636	20.6509	19.3031	20.301	19.7917	21.1799	21.5805	21.326	18.7645	NaN	NaN	NaN	17.012	NaN	NaN	17.6505	NaN	NaN	NaN	NaN	NaN	NaN	17.3808	NaN	NaN	NaN	1	1	1	2	1	1	1	0	1	1	0	0	0	0
NaN	NaN	NaN	NaN	NaN	NaN	NaN	NaN	NaN	NaN	NaN	NaN	NaN	NaN	NaN	19.3542	19.7904	19.2425	NaN	NaN	NaN	NaN	NaN	NaN	20.0327	19.7524	19.205	NaN	NaN	NaN	NaN	NaN	NaN	NaN	NaN	NaN	1	0	0	0	1	0	0	0	0	0	0	0	1	0
23.4916	24.1045	23.4381	22.6401	23.3859	22.9363	22.7474	22.525	22.886	21.6766	22.1923	23.3851	21.8652	21.6387	23.2578	23.5326	23.4649	21.2519	27.091	27.123	26.9824	27.0269	26.6269	26.021	28.6596	28.6305	28.8093	26.9688	26.8546	26.3509	26.9796	26.9013	26.8465	26.3883	27.0352	27.1273	1	1	0	0	0	0	0	0	0	0	0	1	0	0
18.8228	19.3684	19.4469	19.4839	19.3943	19.7401	20.0036	19.7364	18.9248	20.0236	19.3583	19.499	19.1602	19.1788	19.6269	19.4989	NaN	20.5055	20.9644	20.8378	21.1594	20.771	20.4562	18.55	21.5236	21.7268	20.7737	20.7233	20.7066	19.9405	19.9166	19.9061	19.7857	21.2008	19.7968	20.4786	0	0	0	0	0	0	0	0	0	0	0	0	0	0
19.6554	18.8442	18.4244	18.9027	18.5364	18.4184	18.8619	16.6471	17.925	17.5985	19.488	18.5803	18.7662	18.7638	18.7433	18.3996	18.507	18.6073	25.2899	25.0539	22.9918	24.2814	22.3705	22.9844	23.6731	23.6767	23.2337	24.6072	24.3006	24.1046	24.9526	25.2667	25.6431	24.1126	24.2864	24.4109	0	0	0	0	0	0	0	0	0	0	0	0	0	0
26.5202	26.3831	25.7355	26.0634	25.9746	26.0323	26.5096	27.3177	26.2262	26.1062	26.0054	26.4442	26.4982	26.1702	26.6772	27.4809	27.5659	27.6246	25.9345	25.9017	26.0631	25.9344	25.8445	26.668	27.9847	28.1755	28.0535	25.6187	25.5416	25.4889	25.0215	25.2024	25.1546	25.8421	26.0999	26.0047	13	12	4	3	6	8	7	20	8	6	6	5	13	7
19.2845	19.0563	19.1989	19.3771	18.8803	18.8877	19.5873	19.6864	19.5319	19.0287	19.0208	19.0814	18.7772	18.6985	19.4957	20.6656	20.9893	20.851	NaN	18.5674	18.9987	NaN	18.1826	19.1227	20.5702	20.271	20.6615	18.4685	17.8834	17.775	NaN	17.896	17.5136	18.6774	18.7182	18.388	0	0	0	0	0	0	0	0	0	0	0	0	0	0
22.6357	23.4833	22.8974	23.1653	23.5617	23.5526	22.1974	23.7076	23.0383	22.9658	23.2372	23.134	23.9164	23.9294	23.4591	24.7157	24.6005	24.6821	NaN	NaN	21.8693	21.9111	22.0471	22.2196	NaN	NaN	NaN	NaN	19.8255	NaN	21.4514	20.357	21.2928	NaN	NaN	21.2478	1	2	1	1	1	1	0	2	2	1	1	0	1	1
22.6755	22.5751	22.194	22.6294	22.7404	22.8804	22.8273	21.9868	21.7963	22.0433	21.8988	21.6454	21.9587	21.9471	22.1716	21.4751	21.1839	21.1476	21.5498	22.0286	22.4749	21.9535	21.903	22.3367	21.5922	20.5813	19.6827	22.286	21.4465	21.6085	21.2768	21.1577	22.3672	21.2748	21.1222	20.7046	1	2	0	2	1	2	1	0	0	0	1	0	0	1
22.8813	23.0805	23.1355	23.5792	23.7681	23.8988	23.1563	22.9167	23.8458	23.7752	23.94	23.8977	24.0191	24.3148	23.655	24.1856	23.8873	24.2665	22.4071	22.7578	21.7043	22.8301	23.3464	22.206	23.3087	22.972	23.0036	22.8281	22.8016	22.4109	22.7139	23.0542	22.7464	23.7878	23.5192	23.5006	1	3	2	4	4	3	2	2	5	3	3	3	3	5
21.3912	22.1406	22.7627	21.4432	21.7988	22.1588	21.5505	22.2429	22.0925	21.5703	21.6737	21.9951	21.3189	21.6581	21.9633	22.4244	23.074	23.0865	23.0936	21.7994	20.6216	22.3618	22.0996	21.3861	23.0398	23.434	22.9069	22.4215	21.8522	21.7364	21.2735	21.1594	20.9179	21.7812	21.5197	21.8135	0	0	1	0	0	1	0	0	1	0	0	0	0	1
23.2395	22.1032	21.8958	21.6965	23.0823	21.6387	21.7852	21.8993	21.7964	21.3506	21.5866	21.8735	21.5964	21.1642	21.9691	22.2634	24.2196	23.2204	19.8473	20.4617	21.4506	20.1674	20.2866	21.0892	23.8306	22.4835	23.407	20.2659	20.1402	20.09	20.3343	20.4596	20.0149	20.9887	20.9139	21.0167	1	0	0	2	1	1	0	1	1	0	0	0	1	0
16.8392	NaN	NaN	NaN	16.8617	NaN	17.0177	NaN	NaN	NaN	17.1779	NaN	17.0893	NaN	16.2137	NaN	NaN	NaN	20.2867	20.0548	19.52	19.9766	20.1631	20.1184	NaN	NaN	NaN	20.2888	19.4552	20.3123	18.4184	19.5509	20.8402	18.9013	18.6829	18.3186	0	0	0	0	0	0	0	0	0	0	0	0	0	0
NaN	NaN	NaN	NaN	NaN	NaN	NaN	NaN	NaN	NaN	NaN	NaN	NaN	NaN	NaN	NaN	NaN	19.2358	NaN	NaN	NaN	NaN	NaN	NaN	19.8151	20.2167	20.7291	NaN	NaN	NaN	NaN	NaN	NaN	NaN	NaN	NaN	0	0	0	0	0	0	0	0	0	0	0	0	0	0
NaN	NaN	20.2835	20.3623	20.7995	NaN	NaN	NaN	20.2504	21.316	NaN	20.2879	NaN	NaN	20.3099	20.2728	20.6416	20.7522	20.944	21.0902	21.8885	21.0865	21.3499	21.0872	21.9879	21.3791	21.5029	21.2044	21.035	20.9923	21.1321	21.7916	21.3855	22.0057	22.0128	23.1196	0	0	0	0	0	0	0	0	0	0	0	0	0	0
20.8417	19.5076	19.6493	19.745	19.304	18.781	19.8023	20.4414	19.8608	19.9424	20.2923	19.4675	19.4503	19.4891	20.2161	20.2414	20.5836	20.8624	18.4457	NaN	17.8362	18.2823	17.2163	NaN	NaN	NaN	NaN	17.7104	NaN	17.3314	NaN	NaN	NaN	NaN	NaN	NaN	1	0	0	1	0	0	1	1	0	1	1	0	0	0
18.0761	18.0376	17.953	17.9089	18.0089	17.575	18.078	18.4511	18.3325	17.3963	17.5372	17.7693	17.772	17.8579	17.5226	20.9226	19.3308	20.8904	NaN	NaN	NaN	NaN	NaN	NaN	17.4185	17.4536	17.5669	NaN	NaN	NaN	NaN	NaN	NaN	NaN	NaN	NaN	0	0	0	0	0	0	0	0	0	0	0	0	0	0
NaN	NaN	18.9523	NaN	NaN	NaN	19.3368	19.2905	19.2947	19.0525	NaN	NaN	19.117	19.1088	19.3609	19.2729	19.7162	19.33	19.8735	19.5581	20.3598	20.1272	20.168	NaN	20.1007	21.5314	20.1288	19.8892	19.6308	20.3221	19.5342	20.2335	20.0556	20.2343	19.8343	20.3428	0	0	0	0	0	0	0	0	0	0	0	0	0	0
22.703	22.4356	20.6367	22.2042	22.0566	21.949	22.9821	24.2614	22.7248	23.0815	23.2234	23.1006	23.2217	22.4026	23.0293	24.0643	24.7172	24.8668	NaN	NaN	NaN	17.568	18.2708	NaN	23.602	23.4154	23.1412	19.0151	18.7324	18.7289	18.2659	18.5028	18.4818	18.0342	18.9805	18.894	3	1	0	1	1	1	1	6	1	1	2	2	2	1
22.3783	22.1155	21.9995	21.7171	21.9736	22.2394	21.5938	21.8418	22.542	21.4874	21.0935	22.601	21.1909	21.5152	21.4757	22.9507	22.624	23.2836	21.1375	21.9872	22.2972	22.0159	21.8785	22.7656	22.2329	22.4029	22.8517	22.2153	21.801	21.0594	20.6157	21.2919	21.6319	21.9003	22.0246	21.9421	1	1	0	1	1	1	0	0	1	0	0	1	0	0
20.8163	19.7795	18.8654	18.9689	19.0172	19.1945	19.2444	22.4456	19.6221	19.6278	19.4695	19.5838	19.8859	19.6296	19.3394	23.7119	23.7452	23.6568	NaN	NaN	NaN	NaN	NaN	17.2572	17.8669	18.1225	17.753	NaN	NaN	NaN	NaN	NaN	NaN	NaN	NaN	16.9885	1	0	0	0	0	0	0	3	0	0	0	0	0	0
20.3091	18.709	19.6851	19.5167	19.7762	19.5641	19.6495	19.5732	19.495	19.9415	19.4989	NaN	19.9426	18.9304	19.2262	NaN	NaN	NaN	21.734	21.5408	21.0974	21.6194	21.0707	20.6531	19.4016	19.8413	20.1375	21.7452	21.5928	21.8649	20.6273	21.132	20.5836	20.5809	20.6231	20.45	0	0	0	0	0	0	0	0	0	0	0	0	0	0
NaN	NaN	NaN	NaN	NaN	18.3914	NaN	19.0573	NaN	NaN	NaN	NaN	NaN	NaN	19.4112	19.4746	19.2656	19.6554	19.5028	19.604	19.4841	19.4113	19.2294	19.8176	19.631	19.964	21.0249	19.3614	19.0088	19.177	18.9564	19.0067	19.0322	19.6685	19.8015	19.61	0	0	0	0	0	0	0	0	0	0	0	0	0	0
23.135	23.0864	23.8986	26.0516	25.3001	24.9999	24.5347	24.9268	25.6621	25.3676	24.9198	25.6379	24.4839	25.3057	24.8746	25.6898	25.4535	26.0535	17.5151	17.9338	18.2061	18.3282	18.4049	NaN	21.8204	21.5393	21.0515	18.0444	18.2276	18.0253	18.1906	17.4035	17.4401	19.0188	19.1389	18.9621	2	2	3	3	3	2	3	2	2	3	3	2	2	2
22.2768	22.5668	24.9401	25.6616	25.6273	25.3838	23.3534	23.8808	26.1053	27.237	24.6505	25.5828	23.4068	25.9202	23.851	24.4762	23.3344	23.3907	NaN	NaN	NaN	NaN	NaN	NaN	NaN	NaN	NaN	NaN	NaN	NaN	NaN	20.241	NaN	NaN	NaN	NaN	0	0	1	5	6	5	0	0	5	9	2	4	0	8
19.9922	20.4033	20.508	20.6872	20.4644	20.7701	20.5796	21.0115	20.9631	21.0535	20.4625	21.0404	20.2844	20.5334	20.7517	22.1996	22.4746	22.0315	19.5292	NaN	19.5206	19.6733	19.9119	19.8699	20.0061	20.5504	20.0128	19.9838	20.1081	20.0847	NaN	19.7754	18.8021	19.8724	20.1717	19.8898	0	0	0	0	0	0	1	0	0	0	0	0	0	0
23.3832	23.405	23.7109	21.7955	22.7706	21.7986	21.8078	23.2074	23.3073	22.863	23.3287	21.8798	21.6515	22.8604	22.9211	23.2458	24.6314	24.2867	19.3669	19.6093	NaN	19.4149	19.2786	19.572	NaN	NaN	NaN	19.0068	18.9165	18.7649	19.0319	19.1687	19.335	19.631	19.2208	19.5408	2	3	1	0	2	0	0	1	3	2	2	1	0	3
20.6011	20.974	23.7266	22.5199	21.8485	22.4897	21.8585	22.0466	21.827	20.6784	20.5914	21.4832	20.0344	20.5628	20.1463	22.4188	22.0476	22.0437	NaN	18.207	17.6558	18.0123	18.7214	18.93	NaN	NaN	NaN	18.546	17.9719	20.0358	19.7362	NaN	17.9937	17.9082	NaN	19.5965	0	0	1	2	1	2	1	1	1	0	0	1	0	0
16.4973	18.34	18.1247	17.745	18.7969	18.4341	14.7579	17.2247	17.4409	19.9665	20.3871	19.1881	18.7925	20.4765	19.1125	18.9163	18.517	19.359	17.8614	18.0286	19.5113	19.8634	19.7533	19.3285	19.1547	19.7608	18.3443	18.1704	18.5394	18.9108	18.7926	19.5581	20.2659	19.8184	19.5003	19.7895	1	1	1	0	1	0	0	0	0	1	1	1	1	1
19.1885	NaN	NaN	NaN	18.9663	NaN	19.4686	19.2288	NaN	19.1594	NaN	NaN	19.1056	NaN	NaN	NaN	NaN	NaN	20.6539	20.5012	20.4419	20.6176	20.2323	21.7246	NaN	NaN	NaN	22.3349	20.4295	21.7371	20.4265	20.4217	21.6716	20.2505	20.0266	20.1609	0	0	0	0	0	0	0	0	0	0	0	0	0	0
20.924	20.3044	20.1972	20.4346	20.1367	20.7924	19.5023	19.6201	19.5992	20.9514	20.3993	20.4647	20.4326	20.8929	20.523	21.1484	20.8084	20.8809	19.8419	19.5759	19.3764	19.496	19.327	19.6683	20.1168	NaN	20.3162	19.027	19.707	18.2105	19.9998	18.9466	18.9361	20.0516	19.5975	20.0845	1	1	1	1	1	1	1	1	1	1	1	1	1	1
23.8287	25.6148	24.847	26.8946	24.7412	24.3938	26.8979	26.7966	28.9642	26.1412	27.0796	27.1727	28.0941	26.8234	26.0389	25.9063	25.587	25.16	NaN	NaN	19.2497	NaN	19.2875	19.6072	NaN	18.1568	NaN	NaN	NaN	NaN	NaN	18.7445	18.1594	19.2179	NaN	NaN	1	1	1	2	1	1	1	0	2	0	0	2	2	1
26.6139	27.5722	28.6568	28.8193	29.0074	29.1601	28.4533	28.2356	28.9398	29.3455	28.8375	28.9849	28.1339	28.9805	28.4663	27.3803	27.7521	26.6302	NaN	16.3042	NaN	16.0727	17.7504	15.9368	14.5142	15.5296	14.4338	14.1274	15.5944	15.499	17.2859	16.0769	14.1902	14.9383	NaN	16.7406	6	7	9	11	12	12	8	9	11	15	12	12	8	11
28.1539	28.3607	28.0316	27.843	27.9468	27.8883	27.7559	28.1147	27.7597	28.3818	28.3526	27.9588	28.0066	28.2682	28.4764	28.77	28.4971	28.0386	30.0596	29.9313	29.1034	30.2013	29.3421	29.6658	28.5392	28.532	29.06	29.3794	29.6589	29.4756	29.1035	29.7543	29.4736	29.4632	28.6138	29.1175	4	5	6	3	2	4	3	3	3	4	5	5	6	4
23.6429	23.8823	24.2831	23.7379	23.5108	23.8446	25.0986	25.3426	25.7309	24.9084	24.4319	25.2904	25.2551	25.2068	24.6092	24.4481	24.7737	24.0719	24.1805	23.84	24.6379	24.4768	24.9457	24.689	25.2762	25.5308	24.4831	25.4999	24.8238	25.3609	25.3014	25.1196	24.8503	24.9155	24.4635	24.5673	2	2	2	1	1	2	2	6	3	3	3	3	3	2
24.5073	24.7421	24.9677	25.037	25.4419	25.1397	25.1199	24.7789	24.7824	24.8605	23.949	25.0679	24.8965	25.0198	25.1696	24.0435	22.8608	22.9324	21.7862	21.4807	22.6246	22.0457	22.2483	23.4414	21.5805	21.6947	21.8867	22.9107	21.7546	23.1844	21.9638	21.3825	21.8378	21.355	21.7873	21.0579	5	3	2	4	3	3	5	2	2	6	0	3	3	5
19.3749	19.3438	NaN	19.7268	19.6967	19.8557	19.3491	NaN	NaN	NaN	NaN	19.3445	NaN	NaN	NaN	NaN	NaN	NaN	22.3918	21.3798	20.91	21.0663	21.2166	21.6843	20.6751	20.5684	20.7334	21.854	21.5656	21.5283	20.8562	20.8598	21.7242	20.9813	20.9629	20.7807	0	0	0	0	0	0	0	0	0	0	0	0	0	0
20.3189	22.1562	22.6353	20.8411	21.7243	20.4601	24.2836	23.3392	24.4849	22.8213	23.0352	21.9007	21.3564	22.3723	22.7707	NaN	NaN	NaN	NaN	NaN	NaN	NaN	NaN	NaN	NaN	NaN	NaN	NaN	NaN	NaN	NaN	NaN	NaN	NaN	NaN	NaN	0	1	1	0	0	0	1	1	1	1	1	0	1	0
20.0351	19.9436	19.5596	19.6975	19.5965	19.7281	19.3852	19.3787	18.8208	19.5733	19.2899	19.3856	19.6176	19.2266	19.4686	18.9487	19.8462	19.9872	19.3068	19.556	19.1216	19.6294	19.4945	20.9917	20.0725	19.9675	20.6865	19.2255	NaN	19.3558	19.1846	19.3962	19.3222	19.4111	20.3683	19.6789	0	0	0	0	0	0	0	0	0	0	0	0	0	0
18.3649	NaN	16.5464	NaN	16.9776	16.9519	18.8698	NaN	NaN	17.3943	17.6913	NaN	18.1151	17.4808	NaN	NaN	NaN	NaN	20.6401	20.4657	17.9049	20.9039	18.6877	NaN	NaN	NaN	NaN	21.2059	20.9623	19.2309	17.9956	18.9119	NaN	18.4436	17.6456	18.1894	0	0	0	0	0	0	0	0	0	0	0	0	0	0
NaN	21.5996	NaN	NaN	NaN	NaN	NaN	NaN	NaN	NaN	NaN	NaN	NaN	NaN	NaN	NaN	NaN	NaN	18.3413	18.1187	18.3029	18.263	18.0368	18.0401	NaN	NaN	NaN	18.2993	18.1305	18.3183	NaN	18.1066	18.0424	NaN	17.9242	17.8108	0	1	0	0	0	0	1	0	0	0	0	0	0	0
22.9718	23.1907	22.7969	23.1995	23.0671	23.3226	22.6116	23.9402	23.7058	23.4676	22.6571	23.1087	22.6811	23.0694	23.1585	23.4914	23.8348	23.4352	22.2233	22.3932	21.7129	21.28	21.4792	21.3255	22.1885	22.2713	22.3332	21.4837	21.1208	20.956	20.6114	20.6597	20.7752	21.444	21.2235	21.4813	4	4	3	2	3	3	2	4	2	1	1	3	1	2
22.3883	23.5421	22.1313	22.6595	22.68	22.8949	23.0761	23.1407	22.5882	22.8096	22.0446	22.1131	22.4894	21.9338	21.8542	21.5791	21.5668	21.5829	22.18	21.7011	22.973	22.299	21.8928	23.1732	NaN	NaN	NaN	22.4153	21.9209	21.6671	21.2839	21.1513	21.5938	21.284	NaN	20.9391	0	2	0	2	1	2	3	2	1	1	0	0	2	0
26.4667	25.3615	26.8442	28.2534	29.1665	28.3346	26.4449	25.8392	27.3448	28.7078	27.0254	27.3161	28.0195	27.9573	28.0693	27.2033	26.9942	25.724	19.5924	21.0956	19.9511	21.0996	21.5281	19.4606	24.2283	22.3722	24.0444	21.0219	21.1104	20.9801	22.9408	20.5149	21.4823	25.1972	25.3309	25.0694	11	9	10	16	26	16	10	8	13	18	11	6	18	17
29.1586	28.9107	29.996	29.7475	29.4932	29.0685	28.1953	28.4157	25.1315	26.8961	25.9272	24.385	27.5082	26.8021	25.9183	28.5264	28.6674	28.3157	15.0971	14.4912	16.489	13.8604	15.2673	19.6338	15.3357	17.1047	16.5341	13.3574	13.3419	13.0984	15.3602	14.8337	16.6453	15.0833	14.122	14.5951	26	26	33	32	27	22	20	18	11	8	8	2	13	11
NaN	NaN	NaN	NaN	NaN	NaN	NaN	NaN	NaN	NaN	NaN	NaN	NaN	NaN	NaN	19.4404	18.8209	18.9255	NaN	NaN	NaN	NaN	NaN	NaN	18.2502	18.8926	19.54	NaN	NaN	NaN	NaN	NaN	NaN	18.244	18.4302	18.7352	0	0	0	0	0	0	0	0	0	0	0	0	0	0
20.7673	21.311	21.884	21.2008	20.6302	20.9411	20.9176	21.2911	21.5218	20.8569	21.0152	21.3006	21.2966	21.5127	21.6949	21.2007	20.8928	NaN	21.5568	21.1236	20.9609	21.7199	21.7983	21.2436	NaN	20.3003	20.7902	21.9059	22.1839	22.4242	21.986	22.4512	22.5973	21.6157	21.4152	21.5433	0	0	1	1	0	0	0	0	0	0	0	0	0	1
21.5543	22.2496	21.0431	21.5974	22.4649	21.5689	21.8542	20.5808	21.1631	22.2432	21.9191	21.487	21.9393	21.8314	22.1045	NaN	NaN	NaN	20.8106	20.7572	20.5727	21.1058	20.7733	21.2299	20.7571	20.2724	20.2205	20.2088	20.6366	20.5346	20.3443	20.2904	20.1286	20.7448	21.2785	21.6	0	1	0	1	2	2	1	0	1	1	1	1	2	1
20.5364	20.1146	21.7197	21.1497	20.0192	20.5607	19.7978	20.2489	21.5274	20.5699	20.615	19.6187	20.5071	21.2065	21.0705	21.3185	20.4927	20.5059	NaN	NaN	NaN	NaN	NaN	NaN	NaN	NaN	NaN	NaN	NaN	NaN	NaN	NaN	NaN	NaN	NaN	NaN	0	1	2	1	0	1	1	1	2	1	1	0	1	2
20.7321	21.0295	22.9016	20.4332	20.7126	20.516	20.1686	20.094	20.5214	20.5992	20.6373	20.2907	20.4501	20.5915	21.2358	21.4874	22.4528	21.1507	20.2005	20.0207	19.681	19.2065	19.9617	19.931	20.581	21.2041	21.9611	NaN	18.9645	19.4087	19.6546	19.5095	19.3892	19.9644	19.5025	19.8581	0	0	1	0	0	0	0	0	0	0	0	0	0	0
NaN	NaN	NaN	NaN	NaN	NaN	NaN	NaN	NaN	NaN	NaN	NaN	NaN	NaN	NaN	NaN	NaN	NaN	18.9228	18.38	19.3696	19.3146	18.8451	20.7294	19.5331	19.8686	19.9671	19.0107	18.9327	18.5409	18.7959	18.9566	18.6724	19.3044	18.6148	18.7958	0	0	0	0	0	0	0	0	0	0	0	0	0	0
24.8207	24.9981	24.4948	24.7849	24.7236	24.8612	24.9971	24.7405	24.1678	25.0033	24.6015	24.2528	25.2736	25.1676	24.5465	24.2412	23.5586	23.9443	26.1008	25.7053	26.5251	26.4169	26.4414	27.6568	24.6621	24.6611	24.6052	26.7586	26.3059	26.4416	26.1095	25.6543	26.7451	25.8142	25.9784	25.8289	1	1	1	0	1	0	2	1	0	2	1	1	2	1
18.54	18.4202	21.0547	18.8578	17.781	17.6455	17.4624	18.4004	22.0952	18.3001	18.1563	18.3558	17.678	18.9136	19.0435	NaN	NaN	NaN	NaN	NaN	NaN	NaN	NaN	17.6489	NaN	NaN	NaN	NaN	NaN	NaN	NaN	NaN	NaN	NaN	NaN	NaN	0	0	1	0	0	0	0	0	1	0	0	0	0	0
22.2409	21.772	22.0804	21.1702	21.3857	21.0982	22.9889	22.0767	21.8803	23.1788	22.9555	22.924	23.5253	22.816	22.8016	21.2942	20.5519	20.3306	21.8974	21.947	24.1643	23.2149	23.3995	25.9783	19.2406	19.7063	20.4235	21.9861	21.7115	22.1922	21.28	20.9822	21.8333	21.3098	21.0556	20.8246	1	1	1	2	2	1	1	1	1	2	1	1	1	1
21.1611	20.8823	20.3958	20.2482	20.3442	19.9454	20.5309	20.9915	20.6078	NaN	NaN	NaN	20.3083	20.5333	20.8745	20.5672	20.6137	20.0343	NaN	NaN	20.4671	21.0694	20.8401	19.7546	21.5083	22.0432	22.5967	20.849	20.8935	20.5209	NaN	NaN	NaN	NaN	NaN	NaN	1	1	0	0	0	0	0	0	0	0	0	0	0	0
NaN	NaN	NaN	NaN	NaN	NaN	NaN	NaN	NaN	NaN	NaN	NaN	NaN	NaN	NaN	NaN	NaN	NaN	22.1465	21.3041	21.3486	NaN	NaN	20.7115	NaN	NaN	NaN	21.7575	21.0582	21.3216	20.9744	20.9005	21.201	21.2297	20.3919	20.2861	0	0	0	0	0	0	0	0	0	0	0	0	0	0
18.5822	18.8188	18.7045	18.7594	18.5984	18.6189	18.8061	18.8174	NaN	NaN	18.8571	NaN	18.421	18.6062	NaN	18.4069	NaN	18.3315	NaN	NaN	NaN	17.8559	NaN	NaN	NaN	NaN	NaN	NaN	NaN	NaN	NaN	NaN	NaN	NaN	NaN	NaN	0	0	0	0	0	0	0	0	0	0	0	0	0	0
22.549	22.6683	22.2281	21.6659	21.6598	21.0977	21.6074	21.7703	21.0322	21.3827	22.1913	22.2859	21.4302	21.072	21.9375	20.8804	21.0222	21.0849	21.3968	20.8755	20.6986	21.5	21.2926	21.957	21.8147	21.9029	22.6504	21.1137	20.8825	21.2717	20.9396	20.7452	20.6627	21.1328	20.8802	21.0725	2	2	0	0	0	0	0	0	0	0	1	2	0	0
22.3394	22.4284	22.6446	22.9234	22.7112	22.3991	18.778	18.0993	19.0357	21.6757	22.34	20.6462	21.8885	21.09	21.6496	20.1338	20.7603	19.4652	23.5929	22.9996	24.6626	24.0292	24.4948	25.4242	23.2276	23.4945	22.5013	23.5782	24.1827	24.33	23.9879	23.6327	23.7886	24.2864	24.5925	23.9099	1	1	1	2	1	1	0	0	0	1	1	0	1	1
23.4296	22.5703	20.647	20.3482	20.0336	20.4916	21.3507	20.8037	18.1601	19.2473	19.1843	20.1108	21.8878	20.8206	18.8937	NaN	NaN	NaN	20.32	NaN	NaN	NaN	NaN	NaN	NaN	NaN	NaN	NaN	18.1714	18.4613	NaN	NaN	NaN	NaN	17.2598	17.8548	1	1	0	1	0	0	0	1	0	0	0	0	1	1
26.1556	26.0949	25.5936	26.1253	26.2106	26.1689	26.4203	25.7865	26.1656	26.1655	26.2315	26.4446	26.0926	25.7758	26.1737	26.4731	26.4273	26.651	25.4448	25.5837	26.4173	25.9461	26.6315	26.1687	29.0555	28.9096	27.4492	25.8932	26.2696	26.4272	26.7748	26.0995	26.8942	26.8317	27.2328	27.0809	2	4	2	5	6	5	6	2	3	6	2	3	7	3
22.2958	22.2624	21.8897	21.7855	22.3485	22.2694	22.5745	21.9314	22.0051	21.9699	21.6135	22.1778	22.3301	21.7743	22.6676	22.1984	22.4334	22.3596	21.7367	22.3749	23.0104	22.0766	22.1287	22.1584	24.235	24.3435	24.4912	21.9358	22.0632	22.0946	22.904	22.6765	22.4711	22.642	23.3648	23.3664	1	0	0	0	1	1	1	0	1	0	0	1	0	0
19.5272	19.4121	19.4836	19.4413	19.2461	19.4741	19.5615	19.7172	19.3547	19.3945	20.0291	21.5483	19.4997	19.348	19.4739	19.6908	20.2341	19.8287	NaN	NaN	19.7889	19.2725	19.0652	NaN	NaN	20.1032	20.7732	NaN	19.0127	19.1787	NaN	NaN	19.1217	NaN	18.9844	19.349	0	0	0	0	0	0	0	0	0	0	0	1	0	0
23.4996	23.4381	22.8428	21.7059	21.9066	22.2562	22.1996	22.7079	23.0983	22.6805	22.9838	22.6276	22.9242	23.0052	23.3822	24.0816	23.8037	24.0459	21.1264	20.4861	20.8596	20.6095	20.5494	NaN	21.7918	21.3083	22.9339	20.4891	20.3366	20.9111	20.9178	20.6489	20.2514	20.955	21.0883	21.7913	3	2	2	0	0	1	1	2	1	2	1	1	3	1
19.839	19.8128	19.7135	19.6618	21.3855	19.7783	20.1108	20.4358	20.7846	21.1942	19.3732	19.7871	19.5738	19.9556	20.3024	23.2096	21.7121	23.241	18.9364	19.3214	21.1387	20.3508	20.0699	21.5885	19.6412	19.8656	22.1275	20.1678	20.4494	21.4787	21.7244	21.6519	21.827	21.0119	22.1008	21.7335	0	0	0	0	0	0	0	0	0	0	0	0	0	0
23.3809	23.8236	23.0101	23.565	22.8103	23.9474	22.6312	21.9381	22.1062	23.0424	22.7364	22.9723	22.9508	22.9762	23.2656	23.2611	23.3756	23.4631	21.2113	21.7696	21.839	21.9097	21.9171	22.9891	23.4681	23.5189	23.528	20.9818	21.1923	21.5182	21.7276	21.2601	21.6654	22.024	22.3391	22.296	4	2	1	1	0	1	2	0	0	1	1	0	1	1
22.0923	22.6727	21.6707	21.9144	22.4584	22.4512	21.8562	21.9525	21.5157	21.6414	21.6418	21.145	21.5416	21.2993	21.2974	21.1584	21.2416	20.7269	21.857	21.8795	22.3431	22.1035	22.2183	22.0715	22.4043	22.4744	21.4711	22.475	22.0556	23.0089	22.6301	22.1329	22.4358	22.4849	22.4064	22.5339	1	1	0	1	1	1	0	0	0	0	1	0	0	0
25.5125	25.1275	24.9292	25.1995	25.2958	24.0762	24.9109	24.5423	25.8001	23.9747	24.6257	24.6055	24.5354	24.695	25.334	24.7738	24.6503	24.8198	22.189	22.7893	22.7178	22.3694	22.1445	21.8911	24.74	24.5788	24.8148	22.0584	21.941	21.5636	22.2273	22.4792	21.8809	22.6622	22.5037	22.676	5	5	3	4	4	0	2	2	2	0	2	5	1	3
19.5252	19.8855	19.1081	19.8282	19.9459	20.1568	NaN	20.1039	19.7408	19.8605	19.3347	20.0383	19.4142	19.863	19.7779	22.1282	21.0494	22.0916	NaN	NaN	NaN	NaN	NaN	NaN	NaN	NaN	NaN	NaN	NaN	NaN	NaN	NaN	NaN	NaN	NaN	NaN	0	0	0	0	0	0	0	0	0	0	0	0	0	0
19.3644	19.4604	19.6077	19.9485	19.868	19.8956	20.1634	19.4811	NaN	20.5859	19.2033	19.6323	20.4411	NaN	19.4503	19.3611	19.3044	20.032	20.4389	21.5911	20.1341	21.2785	20.3116	20.0855	23.1689	23.3317	22.8288	21.3657	20.4976	20.551	20.5358	20.5056	21.2581	21.5681	20.7248	21.5229	0	0	0	0	0	0	0	0	0	0	0	0	0	0
19.9342	19.4922	19.5085	19.3742	19.6098	19.6508	19.4981	19.8356	19.251	19.5067	19.5027	NaN	19.5076	19.6843	19.5927	19.3544	19.8866	19.826	20.3416	20.3478	19.7328	20.42	20.1978	20.5984	20.9319	22.121	22.827	19.8698	19.5411	19.8391	19.7317	19.8578	19.116	20.4936	21.4354	20.2163	0	0	0	0	0	0	0	0	0	0	0	0	0	0
21.6773	21.4363	23.0025	22.4645	22.8518	21.9343	22.8317	22.1655	22.6332	22.4865	22.2387	22.5852	21.7204	22.4807	22.6409	21.322	22.4446	21.5042	21.307	21.2035	22.538	22.778	22.9461	21.302	22.1012	22.4057	22.1111	22.9449	22.4322	23.2506	23.2751	20.579	22.9167	22.7007	23.1678	22.4677	1	2	1	1	1	1	1	1	1	2	2	1	1	1
21.9751	21.4985	22.1395	23.689	23.7322	22.5972	22.0746	24.3788	23.9089	21.7924	21.6547	22.1596	21.6673	21.491	22.3022	24.8042	23.1982	23.6572	20.4644	21.4219	21.4308	21.0779	21.153	20.8441	24.9441	24.9946	25.2459	21.6108	20.8022	20.8594	20.836	20.7539	20.7849	21.4005	21.5097	22.2962	1	0	0	1	2	0	0	3	1	0	0	0	0	0
17.7778	17.7006	NaN	NaN	NaN	NaN	17.9489	NaN	17.5537	17.647	NaN	NaN	17.9606	16.8577	NaN	17.2963	NaN	NaN	NaN	NaN	NaN	NaN	NaN	NaN	20.7583	20.3927	18.874	NaN	NaN	NaN	NaN	NaN	NaN	NaN	NaN	NaN	0	0	0	0	0	0	0	0	0	0	0	0	0	0
21.5765	21.3136	NaN	20.4888	21.141	21.1358	20.9384	21.3916	20.8143	20.3561	19.4814	20.8249	20.1273	19.9139	19.8861	20.4252	20.7498	20.266	21.0104	21.2804	20.9103	20.3343	20.2394	20.155	20.8061	21.8305	22.2636	19.7529	19.5801	19.7775	19.6759	19.7722	19.4567	20.4952	20.6437	20.2496	0	1	0	0	1	0	0	2	0	0	0	0	1	0
18.2272	NaN	NaN	NaN	NaN	18.5698	NaN	NaN	18.6467	NaN	NaN	NaN	NaN	NaN	NaN	18.061	NaN	NaN	18.9649	19.2447	19.1177	19.5492	19.6943	NaN	19.5552	19.3339	20.7468	19.9492	19.3177	19.4242	19.2243	19.375	19.5208	19.9937	20.1461	20.016	0	0	0	0	0	0	0	0	0	0	0	0	0	0
21.731	21.4639	19.3283	21.5865	20.6349	18.7918	18.9297	20.7982	17.3291	18.7392	19.9219	19.8276	19.1728	21.0701	21.6734	18.1215	20.5325	20.2156	24.0248	25.3342	23.403	23.8784	23.6394	23.3434	26.3044	26.1732	26.2415	22.8453	22.9993	22.9354	23.5506	24.1445	23.5485	24.7017	25.3712	24.0021	0	0	0	0	0	0	0	0	0	0	0	0	0	0
26.3517	25.9409	26.8392	26.1625	26.4245	26.1028	27.0768	26.5567	27.2851	26.4804	26.0764	26.0258	26.6298	26.8369	26.9965	25.0217	24.617	24.4373	23.4791	24.364	24.965	24.2722	24.749	25.249	24.1809	24.003	23.5643	23.7295	24.3479	24.8281	24.9006	24.7813	25.2857	23.9393	24.2166	24.0015	5	7	8	7	5	7	9	8	9	6	7	5	8	8
27.5237	27.7147	27.5521	27.7044	27.7005	27.9052	28.0861	28.326	27.8175	27.2665	27.1156	27.3078	27.4176	27.4634	27.4172	27.6826	27.7532	27.7628	28.3271	28.2555	27.8539	28.4491	27.7662	28.0486	29.6612	29.9869	30.1179	28.3717	28.1352	28.0483	28.2029	28.3603	28.1421	28.4322	28.5588	28.3286	7	10	6	7	7	8	8	9	7	7	4	6	8	5
26.6837	27.0668	27.7736	28.1121	28.0702	27.8362	27.8474	27.1589	27.9507	27.6254	27.7927	27.9402	27.3464	27.9133	28.1385	27.0423	26.9968	27.0966	24.5444	25.2631	25.7782	26.04	26.2485	25.721	25.0763	25.2887	24.4486	24.9956	25.7951	25.5083	25.6234	25.2197	25.5711	25.1171	25.8295	25.5684	7	5	12	12	12	11	10	7	9	13	13	9	10	13
19.0283	19.8381	19.4723	19.3659	18.6085	19.2194	19.5519	20.0863	19.214	20.0281	19.9583	19.2564	19.9942	19.5968	19.9586	NaN	NaN	NaN	20.0842	20.1706	20.4037	19.8591	19.2208	19.3768	NaN	NaN	NaN	20.1021	20.1666	19.6445	20.3264	20.1393	20.0511	19.6747	19.6509	19.2857	1	1	1	0	0	0	0	0	0	0	1	0	1	1
23.0895	22.8972	22.8874	23.374	23.4002	23.6359	23.1789	23.4985	23.5756	23.2647	23.0416	23.1599	22.6181	22.8935	23.1443	23.6331	23.2915	24.4701	21.502	21.5031	21.2872	21.5678	21.4109	21.9208	23.3914	23.4121	22.8924	21.1172	21.3939	20.9565	20.4259	21.0281	21.1623	21.5238	21.2124	21.5034	1	2	0	1	1	2	0	1	1	0	0	0	1	1
NaN	NaN	NaN	NaN	20.1039	NaN	NaN	NaN	NaN	NaN	NaN	NaN	NaN	NaN	NaN	NaN	NaN	NaN	27.9413	28.6901	28.8402	27.7641	29.0815	28.557	28.7349	29.2374	28.5133	27.6837	28.2978	28.5466	30.4641	29.8242	29.3728	27.9212	29.3997	28.9144	0	0	0	0	1	0	0	0	0	0	0	0	0	0
20.878	19.8536	19.6864	20.426	21.608	21.5274	20.113	21.3143	19.6439	19.7694	19.6912	21.0282	19.7581	19.9969	20.8978	22.2656	22.8267	23.3247	NaN	NaN	NaN	NaN	NaN	NaN	20.5428	19.4489	19.5046	NaN	NaN	NaN	18.4732	NaN	NaN	NaN	NaN	19.2541	1	0	0	0	2	2	0	1	0	0	0	0	0	0
24.5786	24.3473	23.9122	24.1671	24.2636	24.1033	26.2578	26.3261	26.357	24.0127	24.2799	24.3231	25.004	25.0836	25.134	25.7365	25.5849	25.2833	NaN	NaN	NaN	NaN	NaN	NaN	20.6806	20.1216	NaN	NaN	NaN	NaN	NaN	NaN	NaN	NaN	NaN	NaN	1	1	1	1	2	0	4	5	4	0	1	0	1	3
NaN	NaN	NaN	NaN	NaN	NaN	NaN	NaN	NaN	NaN	NaN	NaN	NaN	NaN	NaN	NaN	21.8427	NaN	NaN	NaN	NaN	NaN	NaN	NaN	21.5727	21.8982	22.271	NaN	NaN	NaN	NaN	NaN	NaN	NaN	NaN	NaN	0	0	0	0	0	0	0	0	0	0	0	0	0	0
22.2568	22.7011	23.0825	21.9025	21.4677	21.4817	23.4464	23.3181	23.733	22.7235	22.7977	23.57	23.1312	23.1335	22.7636	21.6581	21.0164	20.955	20.5559	20.8525	22.354	20.5363	21.4645	21.7548	20.0304	20.0544	19.1561	20.4518	20.1784	20.2213	20.7003	20.2107	21.6281	20.0158	20.4282	20.1504	1	1	1	0	0	0	1	1	1	0	0	1	1	1
19.6229	19.5354	19.1709	19.0461	18.9646	19.1849	19.8716	19.4482	18.7535	19.2262	19.6815	19.4202	19.37	19.6795	19.4974	NaN	NaN	NaN	20.8074	21.7889	21.9359	21.4657	20.0731	20.9048	NaN	19.4937	19.2675	22.2677	22.0404	21.9485	20.3243	21.9504	21.5463	20.0804	19.603	19.7168	0	0	0	0	0	0	0	0	0	0	0	0	0	0
19.7532	20.119	19.793	19.2888	19.5055	20.0548	19.9373	20.2029	20.2728	20.4255	20.6486	20.4527	20.0743	20.1571	19.9479	19.6073	19.7036	20.0024	21.4225	21.0236	20.7409	20.9301	20.7065	20.7636	22.2792	22.2688	21.9047	20.1211	20.371	20.4599	20.3184	20.7018	20.4773	21.3753	21.033	21.778	0	0	0	0	0	0	0	0	0	0	1	0	0	0
24.0758	24.0221	22.8763	23.1494	22.4261	22.4975	22.2424	22.5005	23.0278	22.3183	22.3483	22.9119	22.7749	22.9591	23.4825	24.5812	23.7043	24.0001	22.7378	22.7736	21.8712	22.811	22.591	23.4472	23.9991	23.6635	23.2996	22.7074	22.1901	22.6985	21.9812	22.0819	21.6761	23.1105	22.7904	22.8808	4	3	1	1	0	1	1	1	1	0	0	1	0	0
28.5396	28.514	28.4357	27.7353	27.5354	27.8213	27.3749	27.0479	27.1149	26.9525	26.7953	26.4012	26.772	26.7735	26.558	27.3032	27.5536	27.6339	25.2825	25.3623	25.9007	26.0405	25.6327	25.0738	25.2417	25.2564	24.7614	25.9324	25.8257	25.8652	25.3983	25.4477	26.3259	25.0899	25.2767	24.966	17	17	11	9	10	13	11	8	7	6	8	5	9	4
23.3019	23.1229	22.8275	23.221	23.0463	23.0913	23.2187	22.7733	23.1321	23.2233	22.6983	22.8809	22.8369	22.9017	23.187	22.8623	23.1109	23.2591	21.7205	21.9671	21.5208	21.8519	22.0147	22.4231	23.2932	23.5877	23.2353	22.0262	21.5892	21.4322	21.2918	21.7549	20.9643	22.282	21.5783	21.8967	2	2	1	2	1	1	4	2	1	1	1	2	2	2
24.5135	24.4127	24.0897	23.5122	23.7805	23.7703	24.3179	23.9779	23.8911	24.9456	24.6783	24.3487	24.7531	24.3684	24.5806	23.5795	24.5114	23.8828	26.0667	25.6089	25.4141	26.2601	25.3767	25.6657	22.8679	23.1089	23.8761	25.7934	26.3986	25.8376	25.766	26.1145	26.1714	25.6876	24.3967	24.7781	2	2	1	0	1	0	0	1	0	2	3	0	0	0
24.0679	24.5667	24.2527	22.7008	23.3813	23.4437	24.2652	24.6801	24.3515	24.0695	23.2721	21.8952	24.2935	23.0169	23.0182	22.4063	24.0085	21.3353	19.9304	20.408	20.4053	19.8221	18.9711	18.573	20.3738	20.6737	20.258	19.5555	NaN	19.9119	19.6423	18.3934	20.1591	20.1796	19.5327	19.0524	2	5	3	2	1	2	2	4	4	2	2	0	3	2
19.6643	19.2895	18.898	NaN	NaN	NaN	NaN	NaN	NaN	NaN	NaN	NaN	NaN	NaN	NaN	19.7706	18.7106	20.3196	NaN	NaN	NaN	NaN	NaN	NaN	20.3787	19.7665	19.2247	NaN	NaN	NaN	NaN	NaN	NaN	NaN	NaN	NaN	0	0	0	0	0	0	0	0	0	0	0	0	0	0
24.5419	24.3844	24.5063	24.2208	23.9982	24.2631	24.3709	24.3377	24.2501	24.3207	24.144	24.1849	24.4611	24.1531	24.2298	24.4292	24.6476	24.5313	23.0384	23.1107	22.7467	23.1619	23.1984	23.5427	24.5865	24.6561	24.6358	22.8284	22.863	23.0237	22.7336	23.0484	22.6506	23.4994	23.1966	23.4261	5	5	4	3	3	3	4	4	3	3	3	2	4	4
NaN	18.4913	18.2604	NaN	NaN	NaN	19.1907	19.0138	NaN	NaN	18.2525	18.5996	NaN	18.4635	NaN	20.153	19.6171	21.3549	NaN	NaN	NaN	NaN	NaN	NaN	NaN	NaN	NaN	NaN	NaN	NaN	NaN	NaN	NaN	NaN	NaN	NaN	0	0	0	0	0	0	0	0	0	0	0	0	0	1
25.8734	26.3925	26.0378	26.1864	26.0111	26.2665	25.724	26.0383	26.1364	26.2436	25.8842	26.0299	26.0942	25.8145	26.0293	26.4599	26.6906	26.3406	25.3363	25.3493	24.9127	25.3849	25.5267	25.6646	26.5542	26.4457	26.7128	25.085	24.8049	24.4792	24.7176	24.9356	24.6488	25.8399	25.3787	25.6723	9	7	7	8	10	11	8	10	4	8	2	8	10	4
26.2145	26.2372	26.269	26.4149	26.2638	26.3364	26.4909	26.8229	26.5388	26.2402	26.3075	26.2911	26.1608	26.4008	26.4606	27.366	27.2233	27.2091	24.2917	24.2731	22.9743	23.3964	23.438	23.9449	25.0335	25.4015	25.4057	23.3692	23.67	23.2509	23.1178	23.2233	22.764	24.2456	24.0011	24.1028	8	11	8	12	16	13	13	20	10	11	10	7	13	8
26.8282	26.3863	26.3697	26.5238	26.597	26.8224	26.613	27.2188	26.5412	26.6096	26.3515	26.4183	26.681	26.5724	26.2284	27.2521	27.5487	27.5269	25.6757	25.4588	25.5269	25.6849	25.3617	26.2693	27.4135	26.9783	27.3903	25.527	25.5551	25.1653	25.6996	25.53	25.3823	25.8706	26.3279	26.2538	7	3	5	6	3	8	6	7	5	3	4	4	6	3
20.7346	NaN	NaN	NaN	NaN	NaN	NaN	NaN	NaN	NaN	NaN	NaN	NaN	NaN	NaN	NaN	NaN	NaN	25.6087	26.057	26.4624	25.1358	24.9828	25.0506	25.6719	25.8244	26.5182	25.1919	24.7232	24.4672	24.9034	24.935	24.594	25.6342	25.7183	25.6591	0	0	0	0	0	0	0	0	0	0	0	0	0	0
18.4862	18.1461	18.3349	18.3953	18.2034	18.6389	18.0764	18.5838	17.9327	18.1924	18.2544	18.5046	18.5694	19.1036	18.4024	18.5995	18.7589	18.4992	NaN	NaN	NaN	17.8039	NaN	NaN	NaN	NaN	NaN	NaN	NaN	NaN	NaN	NaN	NaN	NaN	NaN	NaN	0	1	0	0	0	0	0	0	1	0	0	0	0	0
23.7059	24.1446	25.3657	22.8465	24.8041	25.4484	24.2899	22.5759	22.6788	24.1289	22.2735	23.4701	22.0688	22.553	23.0535	23.2016	25.1727	23.1603	21.8578	21.6799	22.2463	21.0534	21.483	20.6692	24.931	23.7031	24.1861	21.4914	21.3205	21.7643	21.3422	21.6081	21.7286	22.8413	23.2541	22.0395	0	1	1	0	2	2	1	1	1	1	0	1	0	1
NaN	NaN	18.943	19.1488	18.7558	18.7234	NaN	NaN	NaN	19.0019	NaN	NaN	NaN	NaN	NaN	NaN	NaN	NaN	18.6993	18.7081	19.6184	19.1322	19.0364	NaN	NaN	NaN	NaN	19.5101	18.7742	19.2741	19.5869	18.7172	19.214	18.4404	19.2856	NaN	0	0	0	0	0	0	0	0	0	0	0	0	0	0
22.1189	22.825	22.4938	NaN	NaN	20.1941	23.0042	23.0631	NaN	NaN	NaN	NaN	22.6266	NaN	NaN	NaN	NaN	NaN	24.0786	NaN	NaN	NaN	NaN	NaN	NaN	NaN	NaN	NaN	NaN	NaN	23.3773	23.7527	NaN	NaN	23.5222	23.4169	0	1	0	0	0	0	0	0	0	0	0	0	0	0
19.3829	19.7934	19.2505	19.2627	19.3798	19.4049	20.3115	19.2177	19.4411	19.7371	19.2485	NaN	19.1515	19.3616	19.3048	19.4538	19.4433	19.578	22.6853	22.6	19.9759	22.8585	22.1594	19.5764	20.23	20.6026	21.0259	22.5195	22.5561	20.6617	22.151	22.5548	22.4443	22.2286	21.1644	22.2427	0	0	0	0	0	0	0	0	0	0	0	0	0	0
NaN	20.6072	NaN	NaN	NaN	NaN	NaN	NaN	NaN	NaN	NaN	NaN	NaN	NaN	20.1916	19.3253	19.426	19.5906	21.6069	22.1092	22.1612	22.1759	21.5359	18.7468	21.7776	21.4978	22.8617	21.196	21.1809	21.5093	21.6491	21.3378	21.8139	22.1095	21.8288	22.3298	0	0	0	0	0	0	0	0	0	0	0	0	0	0
26.7226	26.9509	27.0709	26.7576	26.4493	26.7819	26.2815	26.2295	26.773	26.6722	26.6946	26.9653	26.3288	26.4048	26.613	26.7089	26.5437	27.1254	23.6967	23.803	22.9075	23.6595	24.1743	23.8955	25.4224	25.5581	25.1023	23.7644	23.7263	23.975	23.6095	23.7544	23.49	24.6629	24.4221	24.3033	12	15	10	10	10	11	7	9	11	11	11	13	9	12
25.6026	25.0873	24.4538	24.29	23.8165	24.2025	23.7993	21.6689	21.6464	22.1688	21.144	20.9767	22.9608	21.537	21.251	20.4986	20.6673	19.3066	19.1337	18.9084	19.7991	19.4237	19.7157	NaN	19.0064	19.5022	19.5092	20.1012	20.0684	19.8844	19.216	19.5343	22.3259	19.1724	18.6366	17.6791	7	8	7	1	4	3	3	0	0	1	1	1	2	0
24.6538	24.6173	24.5492	24.5963	24.5746	24.2998	24.4613	24.174	23.898	24.3743	24.4997	24.3044	24.4828	24.1069	24.4465	24.5025	24.6744	24.5262	24.0337	24.0832	23.5667	24.6289	24.0111	24.352	25.7928	25.5679	25.4762	24.3076	24.4533	24.1004	24.4506	24.6155	24.6225	24.52	24.8571	25.0587	3	3	3	1	2	2	1	1	2	5	3	1	3	2
21.0632	21.9247	20.9001	21.1638	20.7162	21.1003	21.1811	20.8997	21.0077	21.0925	20.7748	20.7914	20.5169	21.0436	21.0627	21.8899	20.8774	21.0705	21.0279	20.7325	21.1123	20.6532	20.9704	21.0419	21.9611	21.388	21.6612	20.5148	20.4487	20.8135	20.3923	20.3658	20.446	20.8458	21.0101	21.0328	0	2	0	0	0	0	0	0	0	0	1	0	0	1
NaN	21.4828	20.516	NaN	NaN	NaN	NaN	NaN	NaN	NaN	NaN	NaN	NaN	NaN	NaN	NaN	NaN	NaN	NaN	20.3194	20.3499	19.8689	20.0478	19.4561	NaN	NaN	NaN	19.5951	20.0319	19.5119	NaN	19.5131	19.45	NaN	NaN	NaN	0	0	0	0	0	0	0	0	0	0	0	0	0	0
NaN	NaN	NaN	NaN	NaN	NaN	NaN	NaN	NaN	NaN	NaN	NaN	NaN	NaN	NaN	NaN	NaN	NaN	18.0702	17.8424	26.5648	18.2999	18.6882	20.206	NaN	NaN	NaN	18.4504	18.2753	19.2616	19.3781	18.4853	19.5294	19.1447	19.745	18.6878	0	0	0	0	0	0	0	0	0	0	0	0	0	0
20.2053	20.0847	19.7119	19.6173	19.7159	19.6774	20.3211	20.704	20.3642	NaN	NaN	19.9389	19.9319	19.6459	19.835	20.1467	21.0876	20.3549	NaN	NaN	NaN	NaN	NaN	NaN	NaN	NaN	NaN	NaN	NaN	NaN	NaN	NaN	NaN	20.4283	NaN	NaN	1	0	1	1	0	0	0	0	0	0	0	0	0	0
21.4436	20.85	21.4313	21.2478	21.8399	21.1312	21.5423	21.4312	21.5397	20.7671	21.3736	21.5041	21.0355	21.0705	21.9652	21.8665	22.4565	22.1439	21.614	21.0424	21.7349	21.4667	21.4315	21.8794	22.9441	23.8102	23.7554	21.7033	22.0196	21.8744	21.1908	21.5856	21.6793	22.2428	22.0651	22.2938	0	0	0	0	0	0	0	0	0	0	0	0	0	0
NaN	NaN	NaN	NaN	NaN	NaN	NaN	NaN	NaN	NaN	NaN	NaN	NaN	NaN	NaN	NaN	NaN	NaN	18.675	18.7336	18.6631	18.4925	18.6521	18.4994	NaN	NaN	NaN	18.3526	18.1469	18.2075	NaN	18.1309	18.0819	18.7661	20.239	18.8551	0	0	0	0	0	0	0	0	0	0	0	0	0	0
20.3585	19.6194	20.0018	19.3409	20.683	20.0126	19.9424	19.5556	18.5885	19.1077	18.5973	NaN	19.9319	NaN	19.184	NaN	19.1682	NaN	19.0352	18.9061	19.357	19.4521	19.2539	19.1934	NaN	NaN	NaN	19.865	19.756	20.8283	20.0487	19.6762	20.1388	18.6032	18.6368	18.773	1	0	0	0	1	0	1	0	0	0	0	0	0	0
20.4529	21.4064	21.8891	20.2062	20.1662	20.5291	20.327	20.9898	20.8685	20.112	20.5374	20.2661	20.2347	20.28	20.1776	20.9043	19.7011	20.1373	20.0877	NaN	NaN	NaN	19.5003	NaN	20.3003	19.7065	NaN	19.1481	NaN	19.032	19.6588	20.8072	20.5664	22.6712	20.2047	20.34	0	0	1	0	0	0	0	0	0	0	0	0	0	0
18.7483	18.5103	19.2753	18.047	19.2097	18.9473	18.8017	19.4715	19.244	18.9781	20.1561	18.3275	19.3272	19.5837	19.1909	NaN	NaN	NaN	19.0296	19.1819	22.5416	19.4381	19.4939	19.5308	21.1413	20.0094	19.5785	19.1749	19.6572	19.4698	18.8179	19.7634	19.6978	19.414	18.8835	18.9191	0	0	0	0	0	0	0	0	0	0	0	0	0	0
22.378	21.8672	21.0232	21.4563	21.3889	21.5033	20.415	20.4211	20.2054	20.4909	20.9834	20.8077	21.1615	20.1249	20.7722	22.2282	22.7714	22.7704	NaN	19.2106	19.0797	19.5239	18.9444	19.5176	22.4024	22.165	21.7085	19.6612	19.1864	19.0789	19.1188	19.8156	18.6279	19.693	19.3666	20.2571	3	2	0	1	1	1	0	0	0	0	1	0	0	0
24.5089	25.1177	25.9288	24.9273	24.5929	25.2845	26.2176	24.972	25.5642	26.265	25.9744	24.6732	25.9525	26.116	25.7735	25.5323	25.8436	26.2598	NaN	NaN	NaN	NaN	NaN	NaN	NaN	NaN	NaN	NaN	NaN	NaN	NaN	NaN	NaN	NaN	NaN	NaN	2	1	0	1	2	0	2	2	1	2	2	2	2	1
NaN	NaN	NaN	NaN	NaN	NaN	NaN	NaN	NaN	NaN	NaN	NaN	17.4888	NaN	NaN	NaN	NaN	NaN	20.2828	20.5924	18.5065	20.9615	21.6318	NaN	24.9722	24.2379	24.9945	22.9012	21.3792	21.1841	20.7783	20.5364	19.6486	20.5163	20.2329	19.5279	0	0	0	0	0	0	0	0	0	0	0	0	0	0
19.1408	19.7874	20.0451	17.7698	NaN	NaN	NaN	NaN	NaN	18.1868	18.0903	21.2209	18.7949	17.8115	18.4354	17.6359	17.9742	17.4502	18.245	18.3941	NaN	22.2052	18.2042	NaN	22.7382	23.036	21.1332	17.6076	17.7911	18.0836	18.0395	17.8064	18.1241	17.515	18.2019	18.4972	0	0	0	0	0	0	0	0	0	0	0	1	0	0
NaN	NaN	NaN	NaN	NaN	NaN	NaN	NaN	NaN	NaN	19.5308	NaN	NaN	NaN	NaN	19.6326	21.3055	19.9286	19.1717	19.1277	NaN	18.8343	18.7988	NaN	NaN	NaN	NaN	18.7173	18.7541	NaN	19.8467	NaN	19.8961	19.5388	NaN	NaN	0	0	0	0	0	0	0	0	0	0	0	0	0	0
22.8615	22.9396	22.8845	23.3429	22.2539	23.0709	22.3373	22.6685	22.7521	23.0058	22.8742	23.5079	22.8417	22.0373	22.3575	23.9226	23.9353	23.823	19.8271	19.8524	19.3563	20.1637	19.9496	21.0678	21.2991	22.9371	22.1927	19.6804	20.4039	19.844	19.9708	19.8008	20.756	20.9133	20.0479	19.2105	3	1	1	2	0	2	1	2	1	1	1	1	1	0
23.6605	22.4175	22.5013	21.5542	22.0669	21.6993	22.1688	22.3626	22.2177	22.0362	22.3121	21.9945	21.9515	22.123	22.698	23.4408	23.0523	23.9855	20.4184	20.8848	21.4135	21.3572	20.7145	22.7991	22.8246	23.4812	23.2267	21.3462	20.702	20.9199	21.006	21.2829	20.6359	21.2498	22.5133	22.6998	1	1	1	0	1	0	1	1	2	1	1	1	1	1
24.3002	24.2434	23.7704	24.1078	24.6066	25.4285	24.8941	24.9196	23.4288	23.5355	23.8789	23.5393	24.1405	21.2087	21.3823	22.5676	21.5117	22.5785	20.0117	20.651	19.3126	19.9787	NaN	NaN	NaN	NaN	NaN	20.115	17.6602	NaN	20.3043	21.9876	18.5188	20.1336	NaN	NaN	2	2	1	2	2	3	2	2	2	1	1	1	2	0
NaN	NaN	NaN	NaN	NaN	NaN	NaN	NaN	NaN	NaN	NaN	NaN	NaN	NaN	NaN	NaN	NaN	NaN	NaN	18.0647	18.0955	18.0993	18.7846	NaN	21.0557	21.1408	20.9342	17.9846	18.2398	17.9566	NaN	17.796	17.631	NaN	18.4024	18.0456	0	0	0	0	0	0	0	0	0	0	0	0	0	0
NaN	18.5058	NaN	NaN	NaN	NaN	NaN	NaN	NaN	NaN	18.5148	NaN	NaN	NaN	NaN	NaN	NaN	NaN	19.3693	19.2049	18.9981	19.3783	19.7199	19.4529	18.5355	18.8948	21.1512	19.1495	19.6748	19.2383	20.073	19.4526	19.4529	19.8331	21.0128	19.9525	0	0	0	0	0	0	0	0	0	0	0	0	0	0
23.4765	23.296	24.3092	23.9495	23.6251	23.2808	24.6971	24.1331	24.7102	24.2626	23.6377	24.1749	24.1747	24.316	24.0917	23.7603	23.5449	23.5453	24.0238	24.2413	25.3754	25.4797	25.2772	24.9096	23.5132	22.6244	22.3515	24.7923	24.9448	25.3061	25.0714	24.9575	24.7732	25.0279	25.0491	24.9476	1	1	1	2	1	1	2	2	2	1	1	0	3	1
27.7264	27.5761	26.9454	26.2576	26.427	26.519	27.8043	27.1776	27.1705	27.0204	27.0148	27.6212	27.4531	26.7749	27.1562	26.3254	25.9048	26.4108	28.2207	28.2039	28.6459	28.0412	28.4964	28.9277	27.1361	27.1509	26.8295	28.5515	28.3159	28.5077	28.1431	28.0583	28.934	27.3688	28.0549	27.7264	6	3	2	2	2	3	4	3	4	4	3	2	4	2
26.3995	26.4352	26.544	26.3299	26.4756	26.4887	26.8657	26.9167	26.757	26.2217	26.1521	25.9261	26.0115	26.0467	26.2248	26.3889	26.5457	26.4886	26.8087	27.1129	26.616	26.9848	26.7119	26.5258	27.9188	28.1193	28.3666	26.7496	26.6834	26.6026	26.7723	26.9871	26.8787	27.4634	27.2185	27.4994	5	7	5	8	7	7	12	11	7	6	4	5	5	5
26.5266	26.5444	26.5723	25.8588	25.7291	26.0434	26.2321	26.4451	26.2261	26.2967	26.4213	26.2356	26.0839	26.1629	25.9182	26.9163	27.0376	27.1017	24.2513	24.0725	24.5516	24.0926	24.2185	24.5268	26.2938	25.8301	25.895	24.5271	24.0399	24.3825	23.8657	23.8869	23.9255	24.8512	24.8623	24.9094	3	3	1	0	1	3	2	2	1	2	4	2	4	1
19.6124	22.4896	23.6188	23.784	23.7285	24.0363	21.2282	22.6507	24.1075	25.9517	23.2439	25.0659	20.5539	24.3966	20.8359	22.5462	19.339	20.684	NaN	NaN	NaN	NaN	NaN	NaN	NaN	NaN	NaN	NaN	NaN	NaN	NaN	NaN	NaN	NaN	18.86	18.0354	0	2	1	1	2	1	0	1	2	3	1	2	0	5
24.1829	24.1429	23.8388	24.2337	24.5216	24.3875	25.1992	25.268	24.5949	23.938	23.7131	23.3551	23.5037	23.9107	24.1372	24.3649	24.8903	24.9214	23.7018	24.0484	24.0844	24.2953	24.4824	24.5937	25.6757	25.92	25.6401	24.4598	24.2668	23.7421	23.8554	24.0952	23.7768	24.6844	24.8597	24.7112	3	3	2	2	2	2	4	4	2	1	1	1	1	1
NaN	19.2595	18.8264	NaN	NaN	19.1085	NaN	19.3342	NaN	NaN	NaN	NaN	19.0186	18.7706	19.0695	21.1601	NaN	19.4755	18.6383	18.6891	18.8006	18.8347	18.8819	18.8848	19.1051	19.4314	19.774	18.8649	18.9982	18.9279	19.1374	18.9349	18.6378	18.9909	19.4051	19.4281	0	0	0	0	0	1	0	0	0	0	0	0	0	0
24.3996	24.4207	24.7787	25.0895	23.7493	22.7097	23.2326	22.7677	25.9815	23.5352	24.5158	24.08	24.5376	24.187	24.1698	25.9354	26.8618	26.2269	20.0624	20.2335	21.1995	21.2645	21.6952	23.161	24.3732	23.421	24.6082	21.3813	20.9125	20.8911	20.3991	21.3169	20.769	21.1807	20.47	21.9343	6	7	2	5	1	1	1	0	9	2	6	3	5	2
NaN	NaN	NaN	NaN	NaN	NaN	NaN	NaN	NaN	NaN	NaN	NaN	NaN	NaN	NaN	NaN	NaN	NaN	NaN	NaN	NaN	NaN	NaN	NaN	19.4328	18.7909	18.4165	NaN	NaN	NaN	NaN	NaN	NaN	NaN	NaN	NaN	0	0	0	0	0	0	0	0	0	0	0	0	0	0
20.4847	20.2406	20.1441	20.7273	20.5955	20.3621	20.6196	21.7914	21.4888	20.6364	20.5253	20.6648	20.6141	20.3635	20.4651	20.7454	20.8875	21.6109	19.5475	19.9804	19.1647	19.9998	20.7195	NaN	21.0317	21.1992	21.3569	19.7538	20.0312	20.3378	19.9725	19.8479	19.2518	20.2719	19.8418	20.3707	0	0	0	0	0	0	0	1	2	0	0	0	0	0
19.4574	19.1962	19.0317	19.0905	NaN	19.0052	19.4052	19.2262	18.4185	19.1389	NaN	NaN	NaN	18.8973	19.6602	19.1031	NaN	NaN	19.4026	19.5381	19.1396	20.433	19.5048	18.893	22.0956	21.2945	20.6029	19.6464	19.5837	19.7418	20.4248	19.6964	19.3201	NaN	20.5458	20.4062	0	0	0	0	0	0	0	0	0	0	0	0	0	0
17.3414	18.0791	17.9122	18.674	17.4452	18.5908	18.9847	18.6075	18.4122	19.1727	17.7813	19.055	18.9905	17.6496	17.8015	17.6346	NaN	18.0932	17.4688	17.3825	17.3871	17.4008	17.6545	17.254	22.364	24.3923	22.7276	17.5693	17.0124	17.1142	17.8319	17.9667	16.8802	17.4103	17.5442	17.6498	0	0	0	0	0	0	0	0	0	0	0	0	0	0
23.7801	23.8061	24.6528	25.4413	25.2625	25.5431	24.9689	25.4025	25.837	25.1806	25.3319	25.3645	25.0312	25.8036	24.895	26.2144	26.4354	26.3903	26.4843	26.3058	28.21	27.7917	28.1891	27.6986	27.0616	27.0901	26.8643	28.7433	28.8401	29.2296	29.5332	28.701	29.5354	29.2448	29.1852	29.3427	1	1	3	2	4	3	3	5	3	3	1	3	4	5
NaN	21.071	20.8434	20.6964	20.4881	20.5916	20.569	20.0247	20.0772	20.0635	19.9929	19.9324	20.2757	20.6232	21.1751	21.8112	23.8716	24.8164	NaN	NaN	NaN	19.387	19.641	20.4881	20.7484	19.3248	20.0454	NaN	NaN	18.208	NaN	NaN	NaN	NaN	20.4891	20.4629	0	0	0	0	0	0	0	0	0	0	0	0	0	0
19.6175	19.3788	19.1646	18.6901	18.6369	18.7388	18.57	18.6217	19.0561	18.8214	19.1174	18.3547	18.4768	18.5237	18.2258	18.4089	18.3675	18.1208	NaN	NaN	NaN	NaN	NaN	NaN	NaN	NaN	NaN	NaN	NaN	NaN	NaN	NaN	NaN	17.7207	NaN	NaN	1	1	0	0	0	0	0	0	0	0	0	0	0	0
25.0173	24.9553	25.8306	25.1348	25.1624	25.1934	26.0414	26.1407	26.1464	25.1547	25.7283	25.6811	25.1296	25.3496	25.5773	27.2242	27.3654	27.1854	23.294	23.591	24.345	23.5475	24.1571	24.0298	24.7626	24.3493	23.9677	23.905	24.2321	24.1038	24.7744	24.4403	24.2694	24.1224	24.5617	24.7559	3	2	3	3	3	4	3	6	6	1	3	6	1	3
22.2065	22.639	22.8148	20.4894	21.329	20.7553	22.8581	20.9134	21.157	21.1893	21.2631	20.5883	21.0292	20.1883	20.7957	NaN	19.906	NaN	21.8902	21.4468	22.5009	21.3201	21.449	22.0559	NaN	NaN	NaN	21.3531	21.8139	21.427	20.7126	20.2212	21.0747	20.7538	20.9189	20.8108	1	1	1	0	0	1	1	0	0	0	0	0	0	0
19.9766	20.2886	19.7752	20.8279	21.223	20.8034	20.2436	20.6877	21.0221	20.8364	21.078	20.6416	20.4674	21.1769	20.8249	20.6475	20.419	20.7638	NaN	NaN	NaN	NaN	NaN	NaN	19.9536	20.1817	19.412	NaN	18.1978	NaN	NaN	NaN	NaN	18.7298	NaN	19.0865	0	0	0	1	1	2	1	2	1	0	1	1	0	1
24.8088	24.6058	24.192	23.5647	23.0665	23.1974	22.3668	24.2017	22.2982	23.5678	23.3584	22.3227	23.7225	23.5065	23.4012	24.9034	24.989	24.3558	19.5507	19.9456	19.7108	NaN	18.4315	NaN	18.4401	19.4861	19.3621	NaN	NaN	17.9431	NaN	18.2025	NaN	NaN	19.3041	19.1007	9	6	4	3	2	2	2	4	0	3	1	0	3	2
18.7411	19.4897	NaN	NaN	NaN	NaN	19.5282	19.851	NaN	NaN	NaN	NaN	18.9201	NaN	20.6181	NaN	20.3146	20.0503	22.4134	22.2528	21.6738	21.8667	22.9	21.2343	21.5618	22.1541	22.1345	22.4459	22.913	22.4516	NaN	21.7182	21.8434	21.8908	22.1731	21.6187	0	0	0	0	0	0	0	0	0	0	0	0	0	0
19.3215	19.1013	19.6204	19.3915	19.0562	19.5024	NaN	NaN	NaN	NaN	NaN	NaN	18.7924	NaN	NaN	NaN	19.4466	19.4047	18.9025	19.9655	18.7603	19.1789	19.1653	20.1809	19.9511	21.0953	20.2564	19.0871	19.4106	19.5643	19.6029	19.6321	19.2703	20.6777	20.9692	20.3342	0	0	0	0	0	0	0	0	0	0	0	0	0	0
22.2416	22.2996	20.174	19.6313	19.7071	19.6907	19.8804	21.6331	19.8201	19.4481	19.9355	21.2694	19.6518	19.5794	20.0309	19.9888	22.0777	21.3284	18.5297	18.9557	18.5649	18.5055	18.3572	19.0329	NaN	19.6625	19.4313	18.4532	18.7324	18.1761	18.7045	18.4852	18.2285	19.2443	19.0531	18.7803	1	1	0	0	0	0	0	1	0	0	0	1	0	0
19.1699	19.5047	19.379	19.2708	19.4986	19.6145	19.4017	19.552	19.4565	21.1137	19.6095	19.7575	19.2887	19.4234	19.454	19.3412	NaN	19.016	19.4042	19.2763	19.3651	19.2879	19.2986	19.5043	NaN	18.9307	NaN	19.3646	19.285	19.2742	20.6627	18.6252	19.1267	18.8991	19.1743	19.3749	0	0	0	0	0	0	1	0	0	1	0	0	0	0
23.5371	23.2101	23.5372	22.5557	22.8267	23.2998	23.4394	23.3592	22.7895	21.6431	23.0718	22.8522	22.5907	21.41	21.1214	20.9952	23.1539	23.0374	20.6001	20.2005	19.4574	19.9181	19.6887	19.9641	20.4299	20.5431	20.4832	19.429	20.1174	20.0595	20.4777	19.9963	19.7623	19.9506	19.7115	19.6357	5	6	2	1	3	3	1	2	1	0	3	2	1	0
NaN	NaN	NaN	NaN	NaN	NaN	18.8072	NaN	NaN	NaN	NaN	NaN	NaN	NaN	NaN	NaN	NaN	NaN	19.4485	19.5498	18.614	19.3396	19.3415	NaN	NaN	NaN	NaN	19.3421	19.0561	19.2019	18.6049	18.8124	19.0195	20.765	19.4508	19.0412	0	0	0	0	0	0	0	0	0	0	0	0	0	0
23.3031	23.1943	22.8833	23.0444	22.7964	22.7736	22.4334	23.0736	23.4793	23.2055	23.5316	22.2708	23.0365	23.3192	23.6581	23.4772	22.9512	22.8138	NaN	22.4188	23.1057	23.1005	23.3454	23.1498	23.0878	23.684	23.0088	22.4494	22.8547	22.0447	22.2588	22.6339	21.9476	22.96	22.9678	22.1064	1	2	0	2	2	1	1	2	2	2	2	0	1	2
NaN	NaN	NaN	NaN	19.3846	NaN	NaN	NaN	NaN	NaN	NaN	NaN	NaN	NaN	NaN	NaN	NaN	NaN	20.9557	20.5697	20.275	21.024	20.6959	21.4923	21.267	21.0087	23.4514	21.4029	21.0518	21.0517	21.3485	21.9182	21.3884	21.6678	21.0595	21.7415	0	0	0	0	0	0	0	0	0	0	0	0	0	0
23.7522	23.3155	22.9796	22.6955	22.6163	23.0334	22.5816	22.8219	22.5572	23.0212	22.9155	23.0173	23.1725	23.1432	23.1748	23.6022	23.4355	24.001	21.3661	21.5395	NaN	21.4513	21.5888	22.747	22.9599	22.7736	22.8288	21.5069	22.4539	22.3316	NaN	NaN	20.9774	22.8876	21.5699	NaN	2	2	1	1	0	1	1	0	0	0	0	4	0	1
20.2292	NaN	19.5303	20.1274	19.5617	NaN	NaN	NaN	NaN	NaN	19.1016	NaN	19.5946	NaN	NaN	19.0557	19.7902	NaN	20.5015	20.6759	21.2992	21.6487	21.8831	20.8542	21.7919	22.6907	22.4875	21.1797	21.2517	21.6763	21.4144	21.0471	21.4454	21.7573	22.2512	22.1991	0	0	0	0	0	0	0	0	0	0	0	0	0	0
19.3528	19.7055	19.8775	19.711	20.043	19.5483	20.9559	19.8565	19.4163	19.5415	NaN	NaN	19.3199	18.892	19.3731	19.8438	19.9312	19.8664	19.1414	19.2353	NaN	18.8934	NaN	19.5979	20.3106	20.9313	21.4992	NaN	NaN	NaN	NaN	NaN	NaN	19.1727	19.3145	NaN	0	0	0	0	0	0	1	0	0	0	0	0	0	0
25.3328	24.9021	24.0076	23.2373	24.2241	24.7101	24.2301	25.3307	22.9855	23.0606	24.3121	23.1769	24.7267	23.016	24.8484	26.8838	26.9446	27.1669	21.4068	19.7878	20.0939	19.5763	19.7362	19.9187	22.1649	22.2836	21.8621	19.7085	19.9971	20.0119	19.7307	19.4114	19.6793	19.3667	18.4563	18.813	3	3	1	0	2	3	1	3	0	1	2	0	2	0
NaN	NaN	NaN	NaN	NaN	NaN	NaN	NaN	NaN	NaN	NaN	NaN	NaN	NaN	NaN	18.861	NaN	18.7104	19.6155	19.413	19.6754	19.0303	20.5985	21.8456	19.4328	19.511	19.4232	19.6276	19.3937	19.4042	19.4529	19.1313	19.4075	19.2351	19.1575	19.2545	0	0	0	0	0	0	0	0	0	0	0	0	0	0
21.9293	22.5946	21.2681	22.1748	22.5379	22.4945	22.1722	22.7819	21.6398	21.6416	22.3189	22.3413	21.6246	22.0875	21.6971	22.1723	22.3307	21.8578	23.5963	23.6612	22.9071	23.5904	22.983	22.2155	22.9322	22.3508	23.289	24.3887	23.6586	23.809	24.4754	23.8262	24.2914	23.3397	23.9074	23.3701	0	0	0	0	0	0	0	0	0	0	0	0	0	1
NaN	NaN	NaN	NaN	NaN	NaN	NaN	NaN	NaN	NaN	NaN	NaN	NaN	NaN	NaN	NaN	NaN	NaN	20.4648	20.4374	19.9281	20.2246	19.7551	19.67	21.8121	23.6151	22.2171	19.9294	19.9621	19.6748	NaN	19.7651	19.6178	21.3249	20.1898	19.3616	0	0	0	0	0	0	0	0	0	0	0	0	0	0
NaN	NaN	NaN	NaN	NaN	NaN	NaN	NaN	NaN	NaN	NaN	NaN	NaN	NaN	NaN	19.0637	19.138	19.1938	NaN	NaN	NaN	NaN	NaN	NaN	NaN	NaN	NaN	NaN	NaN	NaN	19.3362	NaN	NaN	NaN	NaN	NaN	0	0	0	0	0	0	0	0	0	0	0	0	0	0
NaN	NaN	NaN	NaN	NaN	NaN	NaN	NaN	NaN	18.9253	18.5565	18.7521	18.3867	17.7526	NaN	NaN	NaN	NaN	22.2132	21.5275	21.2389	21.4304	21.6824	21.3692	19.2139	18.546	18.593	21.661	20.9019	20.9389	19.2238	19.9172	21.0346	20.678	19.7409	20.4079	0	0	0	0	0	0	0	0	0	0	0	0	0	0
21.1556	20.6445	21.965	19.7022	19.5803	20.0003	20.6321	20.125	18.9513	19.9303	19.3915	19.5635	19.9654	19.0735	19.3868	19.2313	19.6889	19.1944	24.7436	24.4738	24.4921	24.1336	24.0537	23.9847	NaN	18.4888	NaN	24.5326	23.1049	23.5513	23.5573	23.6139	23.7331	21.9198	22.772	21.053	0	0	1	0	0	0	0	0	0	0	0	0	0	0
NaN	NaN	NaN	NaN	NaN	NaN	NaN	NaN	NaN	NaN	NaN	NaN	NaN	NaN	NaN	NaN	NaN	16.641	NaN	18.3928	18.1952	18.1375	18.1465	17.7958	20.1151	20.0798	20.324	18.1846	18.0621	17.8417	18.0369	18.1561	17.8957	19.0434	NaN	NaN	0	0	0	0	0	0	0	0	0	0	0	0	0	0
NaN	NaN	NaN	NaN	NaN	19.4013	NaN	19.0086	19.7129	20.1135	20.4102	19.976	19.9888	19.5021	NaN	NaN	NaN	NaN	21.8774	21.4244	23.1701	21.2232	21.6998	21.7064	19.8811	20.76	20.4973	21.6723	21.7405	21.2	20.7045	20.9835	21.2205	20.6473	20.8661	20.5633	0	0	0	0	0	0	0	0	0	0	0	0	0	0
22.4956	22.7094	23.1057	22.462	22.2108	22.2806	22.4151	22.4058	23.1812	22.5934	22.9216	22.6558	22.4964	22.7678	22.789	23.0843	23.0031	22.2208	NaN	21.445	21.1565	20.7864	20.493	20.8997	20.4031	20.0877	20.2201	NaN	NaN	20.2992	20.549	NaN	NaN	NaN	NaN	NaN	0	0	1	0	0	1	0	1	3	3	0	0	0	3
22.1873	22.8982	24.1266	24.4536	24.2386	24.2463	23.8035	22.8921	24.5288	25.0306	23.4677	24.8697	22.8978	23.8243	22.981	23.3608	23.0032	22.906	21.3846	21.0647	22.0682	22.3874	22.6933	21.6358	21.157	21.9356	21.054	23.3369	23.2853	23.1899	23.6102	23.5677	23.8601	22.7362	23.3024	23.249	1	2	2	3	3	4	3	2	3	3	2	2	2	2
NaN	NaN	NaN	NaN	NaN	NaN	NaN	NaN	NaN	NaN	23.6422	NaN	NaN	NaN	23.8525	NaN	NaN	NaN	23.233	23.5827	23.4694	24.4705	23.6855	23.0895	NaN	NaN	NaN	25.2333	23.6584	23.5987	23.0771	23.4524	23.6414	23.2728	23.1374	23.2329	0	0	0	0	0	0	0	0	0	0	0	0	0	0
18.6662	18.9425	21.4713	NaN	19.0304	18.1193	19.4036	18.8167	18.5683	18.2161	18.6563	18.7346	18.4971	18.017	18.8839	18.7052	19.4033	19.376	18.776	18.2832	17.7911	18.9185	18.6604	17.5542	22.8301	23.6524	23.7307	18.9093	20.3622	19.3489	19.1024	18.736	18.1819	18.3615	19.0701	20.3627	0	0	1	0	0	0	0	0	0	0	0	0	0	0
NaN	19.561	NaN	NaN	NaN	NaN	NaN	NaN	NaN	NaN	NaN	NaN	NaN	NaN	NaN	NaN	NaN	17.9295	22.5613	22.5881	21.4708	21.457	20.9175	20.453	21.786	22.0211	22.4414	21.3383	20.8678	20.3491	20.8194	21.5383	20.4616	21.2979	21.0616	20.9127	0	0	0	0	0	0	0	0	0	0	0	0	0	0
21.3794	22.5983	21.2503	22.7813	21.138	22.0922	22.5283	23.0971	22.0171	21.2929	21.7823	21.3196	21.4828	20.8813	20.5121	20.0423	19.9678	NaN	20.4098	20.9125	21.4855	21.653	19.8685	23.8436	18.7094	19.0514	19.0842	21.4124	20.1962	22.1786	22.4609	20.8519	20.536	20.4484	19.8968	20.0344	0	1	0	2	0	1	1	2	1	0	1	0	1	0
NaN	NaN	NaN	NaN	NaN	NaN	NaN	NaN	NaN	NaN	NaN	NaN	NaN	NaN	NaN	NaN	NaN	NaN	23.9745	23.8054	23.8132	21.7225	21.5143	20.0181	NaN	20.6923	21.2153	21.719	21.6356	21.4355	21.0172	21.3205	21.3787	21.1821	20.8225	20.9619	0	0	0	0	0	0	0	0	0	0	0	0	0	0
NaN	NaN	NaN	18.3165	18.536	18.3078	NaN	NaN	NaN	NaN	NaN	NaN	NaN	NaN	NaN	NaN	NaN	NaN	NaN	NaN	NaN	22.144	22.5605	18.9483	NaN	NaN	NaN	NaN	NaN	NaN	NaN	NaN	NaN	NaN	NaN	NaN	0	0	0	0	0	0	0	0	0	0	0	0	0	0
21.0361	21.8681	22.4217	22.3325	22.2327	22.6216	22.4576	22.0005	24.0703	22.3886	22.1524	23.4261	22.8622	21.7613	21.6833	21.8573	22.3518	22.6388	21.6981	22.2818	23.3924	22.6795	22.3729	22.7287	24.8634	24.447	24.3367	22.9635	22.7258	22.3503	22.8109	22.8632	23.3827	22.6249	23.4419	23.3877	0	0	0	0	0	0	0	0	1	0	0	0	0	0
NaN	19.2087	NaN	19.5066	19.2849	19.2353	18.7407	18.8952	18.6827	NaN	NaN	19.6312	NaN	19.6354	19.1959	21.1454	21.4566	21.5135	18.8646	18.8947	18.0629	19.3504	18.9397	NaN	21.8765	22.1312	21.6231	18.8993	19.5849	19.0908	NaN	18.8302	18.0521	NaN	NaN	NaN	0	0	0	0	0	0	0	0	0	0	0	0	0	0
NaN	NaN	15.7269	NaN	16.4622	15.6353	NaN	15.4269	NaN	15.6699	15.3834	NaN	15.9897	15.8194	16.9324	26.9435	26.3353	25.0222	NaN	NaN	15.7528	NaN	17.6767	NaN	15.028	17.6633	17.4915	16.2934	17.25	16.4283	17.8373	16.184	16.9146	20.8499	23.2411	22.2782	0	0	0	0	0	0	0	0	0	0	0	0	0	0
22.0748	21.7987	22.5786	22.7887	23.1105	22.8447	23.063	22.9224	22.6467	22.3083	22.01	22.2921	22.7403	21.943	22.0338	21.0756	22.0412	21.1014	19.5496	19.6854	20.4696	20.5323	21.4577	21.3864	NaN	20.3122	20.1155	21.0821	20.8345	22.0055	20.1899	20.6649	21.0211	21.512	20.8018	20.4764	1	0	0	2	3	2	1	1	1	0	0	1	1	0
19.8076	19.7826	NaN	NaN	NaN	NaN	18.8639	NaN	NaN	NaN	19.1241	NaN	19.6081	NaN	NaN	NaN	NaN	NaN	20.0293	20.1009	20.986	19.889	20.3389	20.3195	19.7959	19.6987	19.6905	20.4797	20.4376	20.4703	20.175	20.043	22.2268	19.9569	20.2337	20.1197	0	0	0	0	0	0	0	0	0	0	0	0	0	0
NaN	NaN	NaN	NaN	NaN	NaN	NaN	NaN	NaN	NaN	NaN	NaN	NaN	NaN	NaN	NaN	NaN	NaN	NaN	NaN	NaN	NaN	NaN	NaN	NaN	NaN	NaN	NaN	NaN	NaN	17.7518	17.4484	17.019	20.8294	19.9613	18.5861	0	0	0	0	0	0	0	0	0	0	0	0	0	0
21.8037	22.367	21.859	21.3563	20.9605	21.8083	21.4853	22.4687	20.9585	22.0047	21.9857	22.3307	21.8587	21.2665	21.2689	22.3912	22.4854	22.4085	20.756	21.4734	20.5448	21.4378	20.9214	21.8483	22.6998	22.6443	22.4835	20.5174	20.6273	20.4155	20.7223	20.6383	20.2335	21.0727	20.9979	21.0916	1	2	1	0	0	1	0	3	0	1	1	3	1	0
NaN	NaN	NaN	NaN	NaN	NaN	NaN	NaN	NaN	NaN	NaN	NaN	NaN	NaN	NaN	19.5825	19.3998	19.7023	NaN	NaN	NaN	NaN	NaN	NaN	20.4775	20.626	22.0093	NaN	NaN	19.4784	NaN	NaN	NaN	NaN	NaN	20.057	0	0	0	0	0	0	0	0	0	0	0	0	0	0
20.2396	19.9818	22.3054	20.1391	20.7014	20.4521	21.0356	19.7023	18.7986	21.4413	20.5823	NaN	20.0763	NaN	NaN	20.0269	20.8604	19.8661	NaN	NaN	NaN	NaN	NaN	NaN	NaN	NaN	NaN	NaN	NaN	NaN	NaN	NaN	NaN	NaN	NaN	NaN	0	0	1	0	0	0	1	0	0	1	0	0	0	0
24.9211	26.5343	26.9078	26.6507	27.3454	27.2687	27.3829	27.1814	27.4296	27.5325	28.3097	27.5702	27.3002	26.5681	27.3809	26.1094	26.3222	25.8438	NaN	NaN	NaN	NaN	NaN	21.5049	NaN	NaN	NaN	NaN	NaN	NaN	NaN	NaN	NaN	NaN	NaN	NaN	2	4	3	5	6	5	5	6	6	7	7	7	6	3
31.5902	31.0129	30.8455	30.6562	30.5771	30.3267	19.6795	19.088	19.2249	26.922	27.753	27.4844	26.9765	26.3461	26.2664	20.3526	20.0589	20.1535	23.7972	23.141	23.7309	25.5808	25.6229	24.9485	24.3914	23.6903	22.4841	23.2433	25.2902	25.4313	24.1679	23.9172	25.013	23.0589	23.5559	22.9537	10	10	8	9	9	8	0	0	0	3	7	3	3	2
27.2039	27.2618	26.9744	27.0763	27.0712	27.1041	26.9282	27.4634	26.7239	27.1823	27.1359	27.3768	27.4033	26.9662	27.2226	27.0582	27.6415	27.512	27.7539	27.9163	27.1822	28.01	27.8792	27.9249	30.6083	30.7647	30.1989	30.0653	29.9995	29.8357	28.6927	28.5608	28.9984	28.0685	28.1701	28.207	13	10	8	8	9	12	9	9	5	9	7	7	10	6
20.4741	21.1517	NaN	NaN	NaN	NaN	NaN	NaN	NaN	NaN	NaN	NaN	NaN	19.5304	19.5739	20.025	20.1343	19.9426	NaN	NaN	NaN	NaN	NaN	NaN	NaN	18.7165	18.5462	NaN	NaN	NaN	NaN	NaN	NaN	NaN	NaN	NaN	0	1	0	0	0	0	0	0	0	0	0	0	0	0
21.2228	22.3231	21.3228	21.2071	22.2335	21.2401	23.1704	20.8802	21.2057	21.4476	22.0283	23.381	22.8645	22.187	24.015	23.1831	23.6551	23.2727	19.4606	19.2172	17.9639	19.238	20.0584	19.6764	20.0864	20.1942	20.1843	19.1766	19.0112	18.0082	18.5548	18.7716	18.0933	19.9282	19.6885	19.7735	0	1	0	0	1	0	1	0	0	0	0	1	1	0
18.898	18.7671	NaN	18.4784	18.5648	NaN	19.0327	19.6817	NaN	NaN	18.173	NaN	18.8246	NaN	NaN	19.4035	20.5626	19.5504	NaN	NaN	NaN	NaN	NaN	NaN	NaN	NaN	NaN	NaN	NaN	NaN	NaN	NaN	NaN	NaN	NaN	NaN	0	0	0	0	0	0	0	1	0	0	0	0	0	0
NaN	17.7542	NaN	NaN	NaN	NaN	NaN	NaN	NaN	NaN	NaN	NaN	NaN	NaN	NaN	18.6546	NaN	19.0989	20.5121	20.2501	19.3894	20.3726	22.0599	19.7958	21.5056	21.7534	21.015	21.1444	20.1663	19.8238	20.3676	19.9276	19.0898	20.6609	20.1299	20.1033	0	0	0	0	0	0	0	0	0	0	0	0	0	0
18.7916	18.653	19.0404	18.6947	19.1309	18.7798	18.7906	18.9254	18.8852	18.8935	18.4891	NaN	18.5579	18.4031	18.2687	18.8585	19.5586	20.0039	18.1527	18.5458	18.8262	18.2666	18.6256	18.9198	20.2425	19.7815	21.4716	18.4775	18.3806	18.5302	18.7805	18.5465	18.4451	18.7639	19.0093	19.2469	0	0	0	0	0	0	0	0	0	0	0	0	0	0
NaN	NaN	NaN	NaN	NaN	NaN	NaN	NaN	NaN	NaN	19.0864	19.1615	NaN	19.1272	19.3042	21.5083	22.1431	21.6841	NaN	NaN	NaN	NaN	NaN	NaN	NaN	NaN	NaN	NaN	NaN	NaN	NaN	NaN	NaN	NaN	NaN	NaN	0	0	0	0	0	0	0	0	0	0	0	0	0	0
19.0857	20.0054	19.7955	19.9809	19.5606	19.671	19.5204	18.9356	19.6938	19.8733	19.5744	19.8836	19.2528	19.8008	19.8788	19.3789	18.7444	NaN	18.969	19.0082	19.222	19.2185	19.5208	19.4526	19.3026	19.6205	19.676	19.3726	19.1778	19.2226	19.2147	19.118	19.0649	19.1815	19.3723	19.4723	0	1	0	0	0	0	0	0	0	0	0	0	0	0
26.4502	25.9817	25.8514	25.9917	27.7212	27.3653	27.1027	26.8727	26.2288	25.7428	26.3648	25.956	27.1633	25.5875	26.4173	26.57	27.0902	26.9061	22.4299	23.8398	22.8381	23.6138	23.6846	22.9548	25.335	23.9077	25.4137	21.8925	22.0149	21.7623	21.4027	21.4097	22.0914	22.4443	22.5936	22.3111	7	3	2	2	5	5	7	6	3	3	4	5	6	2
NaN	NaN	NaN	NaN	NaN	NaN	NaN	NaN	NaN	NaN	NaN	NaN	NaN	NaN	NaN	NaN	NaN	NaN	NaN	19.2217	18.9184	19.2355	19.4362	NaN	21.4385	20.2315	19.9875	19.3347	19.4646	19.2895	19.3441	19.4097	19.0197	19.4192	19.3651	19.4367	0	0	0	0	0	0	0	0	0	0	0	0	0	0
21.7643	21.9802	22.4445	20.8669	20.8793	21.4236	21.5729	22.2426	21.4848	21.5264	20.216	21.0419	20.5757	20.5518	21.7591	22.9455	21.7313	21.8623	22.5724	22.6185	22.5159	22.3398	22.0133	22.1787	23.9914	24.1256	24.0538	22.3102	22.1467	21.8808	21.7326	22.1222	21.3914	22.3131	21.9785	22.0563	2	1	1	0	1	1	1	1	0	1	0	1	0	0
20.0342	20.1517	20.2954	21.5109	21.539	22.165	19.6212	19.6723	21.4717	22.9142	21.2252	21.7035	21.4542	20.8809	20.3124	19.4949	20.4689	19.8777	19.4057	19.0296	18.6816	18.8256	NaN	NaN	NaN	20.8175	20.7622	18.184	18.4575	NaN	19.0863	18.7206	18.3969	NaN	18.5116	NaN	0	0	0	1	1	1	0	0	1	5	2	3	1	2
NaN	19.0001	NaN	NaN	NaN	NaN	NaN	NaN	NaN	NaN	18.504	NaN	NaN	NaN	19.0709	NaN	NaN	NaN	18.6529	19.053	18.8908	18.9632	19.0728	NaN	20.0305	19.5838	19.9748	19.0176	NaN	NaN	NaN	NaN	18.9216	19.9557	20.2929	NaN	0	1	0	0	0	0	0	0	0	0	0	0	0	0
19.2766	20.0288	19.7035	19.9452	19.5232	19.3726	18.9916	18.471	18.595	20.1547	18.9038	20.643	18.8888	NaN	18.7955	18.8973	18.7509	19.0687	19.6631	19.3068	19.3211	20.3322	19.4878	19.9297	NaN	NaN	NaN	19.529	19.4734	19.275	19.4938	18.9144	19.026	20.1833	20.8863	21.1636	0	0	0	0	0	0	0	0	0	0	0	0	0	0
22.6654	22.1618	23.2314	23.3041	23.2382	22.9373	23.139	22.8389	23.7372	23.2676	23.9414	23.5374	23.6187	23.7376	24.3452	23.0206	22.5729	23.2052	NaN	NaN	19.0776	20.9033	21.2907	20.3872	NaN	18.9774	NaN	21.3787	21.055	22.201	21.5905	21.0112	22.3684	20.9729	21.4523	21.0326	1	1	1	2	2	1	1	2	2	0	2	1	2	2
19.4433	18.7737	19.105	18.8741	19.8244	19.3967	18.8836	19.9112	19.7808	NaN	19.2041	NaN	18.7073	18.88	19.9532	20.4816	19.7854	21.301	20.8912	20.9823	20.9986	20.9947	20.7427	20.2008	23.4909	23.0733	23.7699	20.4967	19.9582	20.0399	20.7735	20.5278	20.3101	20.5803	20.9219	21.5594	0	0	0	0	0	0	0	0	0	0	0	0	0	0
21.4926	21.2231	21.8693	21.4671	21.6428	21.0029	21.5357	21.2454	21.308	20.798	21.2106	21.713	20.5701	20.4589	21.2666	21.1864	21.5849	20.752	19.6521	19.9663	19.4714	20.1182	20.2852	19.3853	20.3976	NaN	NaN	20.0454	20.1074	20.0379	18.6822	19.8784	19.7481	24.9122	24.9747	24.9236	0	0	0	0	0	0	0	0	0	0	0	0	0	0
26.9659	27.2957	27.6995	28.1669	28.0985	28.4837	29.3271	27.7736	28.8915	28.9958	29.3396	28.1464	29.4946	28.4064	28.8273	27.3805	27.2068	27.5473	22.8332	23.1925	22.1875	25.4408	25.2582	21.2417	20.2409	20.3691	20.8858	25.5171	25.0088	26.0248	25.3477	24.1312	25.9156	24.4602	25.3253	24.1113	3	2	2	3	5	5	5	3	3	5	5	4	6	4
17.1335	17.5495	17.38	16.2181	16.063	15.7552	15.4542	16.039	17.0062	21.2647	22.316	21.6348	22.3629	22.4685	22.0676	NaN	NaN	NaN	NaN	NaN	15.5686	NaN	NaN	16.0144	15.6759	16.0102	17.1966	NaN	NaN	NaN	NaN	NaN	NaN	NaN	NaN	NaN	0	0	0	0	0	0	0	0	0	1	1	1	1	1
NaN	NaN	NaN	NaN	NaN	NaN	NaN	NaN	NaN	NaN	NaN	NaN	NaN	NaN	NaN	NaN	NaN	NaN	19.8242	19.5246	22.0814	19.7748	19.7668	20.8341	NaN	20.7446	20.019	19.8964	19.3875	19.7393	19.7328	19.0713	19.4636	19.2617	20.5562	19.9811	0	0	0	0	0	1	0	0	0	0	0	0	0	0
NaN	NaN	NaN	NaN	NaN	NaN	NaN	NaN	NaN	NaN	NaN	NaN	NaN	NaN	NaN	NaN	NaN	NaN	18.6042	NaN	18.2953	18.2412	18.372	NaN	18.6948	19.1208	19.1745	18.2608	18.1121	18.9415	19.3906	18.8556	18.8219	18.6649	18.5389	18.4037	0	0	0	0	0	0	0	0	0	0	0	0	0	0
20.2222	19.4714	19.9538	NaN	19.6738	20.2652	22.6399	21.5505	23.9677	21.0858	22.22	21.0876	23.321	22.8441	22.577	NaN	NaN	NaN	18.9783	NaN	18.941	20.4432	22.2134	19.9421	21.1802	21.3713	NaN	20.4252	20.2922	20.564	20.4245	20.2326	21.2697	19.6181	20.6133	19.374	0	0	0	0	0	0	1	1	2	0	2	0	1	2
NaN	17.7314	NaN	NaN	NaN	NaN	NaN	NaN	NaN	NaN	18.3201	NaN	NaN	17.9081	NaN	NaN	NaN	NaN	17.6704	17.7977	18.1135	17.5922	17.9074	NaN	NaN	NaN	NaN	18.5946	19.3556	18.6509	18.2892	18.1761	18.3898	17.6163	18.0549	17.3942	0	0	0	0	0	0	0	0	0	0	0	0	0	0
18.2414	18.4469	18.1051	18.5533	17.8149	17.551	18.4653	18.3053	18.4455	18.8123	18.8036	18.786	NaN	18.4955	18.083	18.1282	18.6484	17.7707	20.5975	22.0587	21.4309	21.7223	22.3373	23.3504	23.1907	22.2774	24.1106	22.2801	21.884	21.9548	NaN	NaN	21.6698	22.138	20.472	22.2365	0	0	0	0	0	0	0	0	0	0	0	0	0	0
19.9406	19.2693	19.9282	19.8665	19.3229	19.3894	20.1556	19.5178	19.9459	19.2092	20.1581	19.8186	20.3238	19.9049	19.9396	19.3651	NaN	19.3851	22.274	22.182	21.6601	21.3315	21.577	22.4963	20.9877	20.9667	21.8882	21.1217	20.9175	20.9591	20.6095	20.5679	20.8728	20.8044	21.1468	20.8901	0	0	0	0	0	0	0	0	1	0	1	0	1	1
24.3306	24.8052	25.4038	22.3893	22.1139	21.8675	24.4844	24.9871	24.5575	25.5208	26.2757	25.7998	25.6101	25.8848	25.6881	24.1644	23.3703	22.7876	17.2781	17.8414	NaN	NaN	18.1869	18.5202	NaN	NaN	NaN	17.8241	18.1385	19.0452	17.3195	18.3491	18.0031	16.5803	18.1639	17.5947	2	2	2	1	1	1	2	4	2	3	5	2	4	3
22.8336	23.7211	22.9798	23.1702	22.7264	22.8994	23.9634	23.7105	22.9421	23.8515	23.4784	22.9908	23.2408	24.2765	23.7582	21.8702	22.5632	21.358	NaN	NaN	NaN	NaN	NaN	NaN	NaN	NaN	NaN	NaN	NaN	NaN	NaN	NaN	NaN	NaN	NaN	NaN	1	2	0	1	1	1	2	2	1	2	2	2	2	2
24.2981	23.7777	24.4889	23.1509	23.1544	22.7239	25.1278	23.5292	24.9764	23.8754	24.6896	24.5724	23.1739	23.6257	24.1837	23.4803	23.1599	23.3218	NaN	NaN	NaN	NaN	NaN	NaN	NaN	NaN	NaN	NaN	NaN	NaN	NaN	NaN	NaN	NaN	NaN	NaN	2	1	1	0	0	0	2	0	2	0	4	2	2	0
23.0379	22.5678	21.8358	22.6544	22.5246	22.6766	22.7171	23.2162	23.0641	22.8017	22.5546	23.3205	22.4413	22.9768	21.4789	22.2498	24.1293	21.8058	20.2098	20.8594	20.8574	20.5297	20.4935	21.1634	NaN	NaN	21.5637	20.4396	20.5287	20.4282	20.8712	21.1737	20.5814	21.0605	20.9754	21.5711	2	1	1	2	2	2	1	2	1	1	1	1	2	2
27.2065	27.1222	27.1628	26.5344	26.6385	26.652	27.2233	26.8024	26.7969	27.0809	27.079	26.8449	27.3474	26.9437	26.997	26.2794	26.0355	25.887	25.4249	25.4765	25.7167	25.2375	24.9713	26.4709	23.8578	23.8792	23.5511	25.3375	25.0945	25.1285	24.9948	25.0723	25.6563	24.7297	24.5195	24.5558	14	11	12	11	10	10	12	10	8	10	12	10	8	14
21.8839	21.6912	21.5414	21.3548	21.576	20.9671	21.5094	21.342	21.1383	21.2223	21.9427	21.7106	21.9144	21.9467	21.1862	22.5164	22.6736	22.8436	20.8108	21.2687	20.4954	22.1593	21.1857	21.7	22.8249	22.8152	22.9409	20.9319	20.947	20.6189	21.2122	21.0424	20.8201	21.7309	21.9804	21.4937	0	0	0	0	0	0	0	0	0	0	1	0	1	1
19.7369	19.6806	NaN	NaN	NaN	NaN	NaN	NaN	NaN	NaN	NaN	NaN	NaN	NaN	NaN	NaN	NaN	NaN	20.8594	20.5049	NaN	NaN	NaN	NaN	18.9694	18.4254	18.4645	19.8572	19.9951	19.014	NaN	NaN	19.133	18.9231	18.5116	NaN	0	0	0	0	0	0	0	0	0	0	0	0	0	0
20.7253	20.0513	21.0968	22.3068	21.0896	20.963	22.2508	20.8581	21.9226	20.7499	21.8193	22.0617	22.7226	21.2779	21.1033	20.2706	18.912	18.9764	NaN	NaN	15.7276	NaN	16.6627	NaN	NaN	NaN	NaN	17.139	17.6424	17.0998	18.0748	17.1215	17.8564	16.6855	16.7586	17.2443	1	1	1	1	1	1	1	1	1	0	1	1	1	0
20.7431	21.1466	21.0221	20.9124	20.8378	21.2804	20.9006	21.4532	23.0027	20.9913	21.1169	21.6268	20.7012	20.6942	21.1322	21.0761	21.4433	21.3185	22.04	23.375	21.0439	21.8569	21.8792	23.0552	24.2974	24.0257	24.333	21.5583	21.5917	21.1547	22.7479	21.5789	21.2694	22.574	23.4459	23.7072	1	0	0	0	0	0	0	0	0	0	0	0	0	0
25.2893	24.8442	24.8743	25.665	25.5658	25.4398	26.2242	26.0451	26.0291	25.5563	25.6241	26.0618	25.5543	26.0576	25.7969	25.2917	24.82	25.1741	NaN	NaN	NaN	NaN	NaN	NaN	NaN	NaN	NaN	NaN	NaN	NaN	NaN	NaN	NaN	NaN	NaN	NaN	2	2	2	3	4	3	3	5	4	5	4	4	5	5
NaN	NaN	NaN	14.9754	16.3534	15.5405	NaN	NaN	15.845	16.336	17.281	17.6049	16.8964	17.3579	17.0733	18.4524	18.4327	19.0076	17.3538	19.0717	19.7455	20.1512	20.5791	19.8804	19.0427	17.6915	16.4742	21.4031	21.4341	21.5467	23.9535	21.5358	24.5618	24.1924	23.7095	23.8399	0	0	0	0	0	0	0	0	0	0	0	0	0	0
26.3674	26.0436	26.0486	25.4569	25.793	26.2652	26.6849	25.6329	25.7928	26.2416	25.8106	25.8715	26.5833	26.4151	25.5234	24.5209	24.56	24.2024	24.1145	23.8741	23.7673	23.7642	23.5419	25.804	NaN	NaN	17.6078	24.0594	23.5378	23.4276	22.7166	22.7824	23.7508	22.7542	NaN	23.1117	2	1	2	2	1	1	2	1	1	1	0	1	2	2
19.2765	19.3262	19.2948	16.9296	NaN	17.3907	22.9851	22.9111	22.8476	NaN	NaN	18.9322	NaN	NaN	NaN	NaN	NaN	NaN	20.1998	20.2795	22.4881	19.7024	20.7031	21.2406	23.7205	22.5538	23.2898	19.7256	19.4735	20.9381	21.6061	21.5057	21.0559	20.1162	20.6358	20.0689	0	0	0	0	0	0	1	1	1	0	0	0	0	0
22.272	22.266	24.7117	22.4792	22.424	22.6764	26.3283	26.5855	26.3795	23.3848	23.9096	24.7836	23.4099	24.8472	25.676	23.5626	23.2015	23.4439	18.4484	18.4288	21.8464	19.1883	19.4477	19.9976	18.2747	17.6004	NaN	19.3669	19.3005	19.786	19.2825	19.4948	19.9146	18.9597	19.3006	18.0225	1	1	3	1	1	2	6	5	7	2	3	3	3	2
NaN	19.4657	NaN	18.7736	NaN	18.9563	NaN	19.2995	19.082	19.0762	19.4954	19.2769	NaN	19.002	19.4794	20.9531	20.4871	21.109	22.1939	21.2347	20.4987	21.3641	20.9976	20.7717	20.6115	20.8208	21.3487	20.6857	21.7839	20.6405	20.7955	20.953	20.6283	21.3358	22.1434	22.5298	0	0	0	0	0	0	0	0	0	0	0	0	0	0
NaN	NaN	NaN	NaN	NaN	NaN	NaN	NaN	NaN	NaN	NaN	NaN	NaN	NaN	NaN	20.0768	19.7375	19.2306	NaN	NaN	NaN	NaN	NaN	NaN	NaN	18.5419	NaN	NaN	NaN	NaN	NaN	NaN	NaN	NaN	NaN	NaN	0	0	0	0	0	0	0	0	0	0	0	0	0	0
21.3904	21.4528	21.3888	21.2895	21.2721	21.8954	20.997	23.7884	20.9017	21.1865	20.4543	21.2414	22.7064	20.3025	20.8607	25.6022	25.0811	26.0133	18.5387	NaN	NaN	18.3132	17.0891	NaN	19.2885	18.1459	19.5689	17.9471	NaN	NaN	NaN	17.4151	NaN	NaN	NaN	NaN	0	0	0	0	0	1	0	4	0	0	1	0	1	0
22.8322	23.2407	23.1013	23.13	23.1839	23.0373	22.9128	23.3667	23.9541	22.5705	23.0677	NaN	22.7824	23.35	22.8975	22.963	22.3537	21.5562	22.8114	NaN	23.414	22.4006	23.7668	23.3087	22.7138	22.9784	23.6837	23.3562	23.5064	23.8961	24.4083	24.1957	NaN	25.3774	23.7952	23.8378	1	0	1	0	0	0	1	0	0	0	0	0	0	0
23.3339	23.8225	22.991	23.1575	22.738	23.2838	23.0853	23.2828	22.6647	22.8626	23.1625	22.6842	23.1341	22.9395	22.8966	22.0027	22.4414	22.6917	21.2055	21.3483	21.7023	22.3711	21.7816	21.6654	23.0219	22.8114	23.0382	22.6234	22.3979	22.4725	22.3622	22.8704	22.0436	22.4163	22.1577	22.1197	5	4	2	2	3	3	1	2	1	3	4	1	2	4
28.2631	28.4294	28.3079	28.4843	28.3023	28.5173	28.544	28.5534	28.3356	28.6324	28.3665	28.5808	28.4149	28.6296	28.6893	28.7897	28.4515	28.472	30.7301	30.2099	29.2486	30.4121	29.7241	29.9973	28.5993	28.4505	29.0175	29.7945	29.7819	29.6596	29.1707	29.8769	29.4317	29.5024	29.0809	29.137	11	14	11	13	10	15	14	17	15	13	14	13	16	16
20.3501	20.4629	NaN	19.7329	19.7815	19.8015	19.9178	20.3131	20.5396	19.9028	20.088	20.1975	20.1628	19.9049	NaN	20.5109	20.5037	19.7648	NaN	NaN	NaN	20.178	19.7261	20.4938	NaN	NaN	NaN	NaN	19.6245	NaN	20.5796	NaN	20.1024	NaN	20.072	NaN	0	0	0	0	0	0	0	0	0	0	0	0	0	0
21.2114	22.0783	21.5238	21.4706	21.4222	21.4095	20.735	20.862	20.8546	21.0701	21.1968	21.0405	20.7895	21.1379	21.1423	21.1773	21.669	21.7871	22.0147	22.199	21.748	22.4762	22.2102	21.7675	23.6962	23.8274	23.7272	22.0058	22.2025	22.1543	21.8033	21.9813	21.4135	22.1802	22.2938	22.5741	1	1	0	0	0	1	0	0	0	0	0	0	0	0
24.5645	24.4205	25.2587	25.3681	25.6883	25.1037	25.2336	24.4122	25.4661	24.9907	24.4844	25.1462	24.3028	24.3088	25.2843	24.7542	25.2782	25.1036	NaN	NaN	NaN	NaN	NaN	NaN	NaN	NaN	NaN	NaN	NaN	NaN	NaN	NaN	NaN	NaN	NaN	NaN	3	2	3	5	6	5	3	3	5	7	4	4	3	3
21.3231	NaN	23.7377	24.2436	24.2431	23.6605	21.2848	20.8221	24.0679	26.2671	23.0539	23.5397	21.863	24.7061	22.1432	21.1255	21.1812	22.3958	NaN	NaN	NaN	NaN	NaN	NaN	NaN	NaN	NaN	NaN	NaN	NaN	NaN	NaN	NaN	NaN	NaN	NaN	0	0	1	1	2	0	0	0	1	5	1	2	1	3
NaN	NaN	NaN	NaN	NaN	NaN	NaN	NaN	NaN	NaN	NaN	NaN	NaN	NaN	NaN	NaN	NaN	NaN	24.7933	25.7448	27.7193	26.903	26.4819	28.4053	22.9829	21.8849	22.73	25.6527	25.7897	25.2233	24.7489	24.3799	25.3758	23.921	24.059	23.7945	0	0	0	0	0	0	0	0	0	0	0	0	0	0
NaN	19.0698	NaN	NaN	NaN	NaN	NaN	NaN	NaN	NaN	NaN	NaN	NaN	NaN	NaN	NaN	NaN	NaN	23.702	24.5574	23.1733	23.8588	23.9865	23.5196	25.0288	24.9979	25.2173	23.861	23.7609	23.6969	24.1319	23.6681	23.9459	24.1831	24.6371	25.2086	0	0	0	0	0	0	0	0	0	0	0	0	0	0
20.1923	19.861	20.0426	20.1797	20.1071	20.4695	20.7209	21.6997	20.389	20.0433	19.0967	NaN	19.5965	20.207	19.8883	21.0039	21.1345	20.4822	NaN	NaN	19.6082	17.9412	19.4063	19.4908	19.4484	20.1521	19.8223	NaN	NaN	NaN	NaN	NaN	NaN	NaN	19.7773	NaN	0	0	0	0	0	1	0	2	1	0	0	0	0	0
22.9658	23.543	23.6585	23.8087	24.0397	23.605	24.5376	20.8282	21.3944	23.6827	23.633	23.6444	23.6357	21.7521	21.3253	23.4311	23.8856	23.4276	24.5152	24.9753	24.5146	25.1639	24.9685	24.3875	26.8846	27.4586	27.8799	25.0503	25.1431	24.8772	24.866	24.9536	25.2552	25.3066	25.6889	25.6819	1	1	0	1	2	1	1	0	0	1	1	1	0	0
26.5076	26.1963	25.3558	24.2364	24.8388	24.7873	25.4312	22.21	22.1468	25.2319	24.9242	24.7808	25.4284	24.0377	24.3151	22.4778	21.8988	22.2394	26.4349	26.223	26.4415	23.2761	21.6678	24.056	20.7788	21.2383	19.541	20.6986	20.056	20.4007	21.0099	21.882	21.6337	20.4764	19.1871	19.4638	17	12	10	3	5	4	5	0	0	5	5	1	5	2
21.8231	22.5551	21.474	21.1834	21.7564	21.9063	21.6184	21.4106	20.9957	22.2902	21.4933	21.4101	21.8637	21.1195	22.0835	22.9571	22.8536	21.8118	22.2252	21.8395	20.8496	21.7908	21.2915	21.8017	21.3966	21.3331	22.1694	21.1331	21.3764	21.0357	20.9913	21.3698	21.068	21.4008	21.0973	21.1747	1	1	1	0	1	1	2	1	0	1	0	1	3	0
NaN	20.1733	NaN	NaN	NaN	NaN	20.7292	NaN	NaN	NaN	20.3635	NaN	NaN	20.4514	20.2269	NaN	NaN	NaN	20.7544	21.1704	20.4417	21.0245	20.2164	20.433	NaN	20.0716	19.8616	21.6491	21.3729	21.61	21.3665	21.4001	21.3776	20.6789	20.592	20.8454	0	0	0	0	0	0	0	0	0	0	0	0	0	0
20.0552	20.6407	19.6197	19.8907	19.2142	19.0748	NaN	19.8531	19.5806	19.5037	18.8189	19.3229	19.8188	19.6532	19.1099	20.2537	19.6199	20.5141	23.4908	24.5732	24.0812	24.3816	23.9036	22.161	22.2241	22.7816	22.8159	23.4957	23.9291	23.8447	22.0608	23.9747	23.664	22.4885	22.6761	22.7733	0	0	0	0	0	0	0	0	0	0	0	0	0	0
22.2158	22.4315	22.2025	22.4415	22.3993	22.5146	21.9993	22.96	22.5717	21.48	21.2153	21.9337	22.4978	21.4687	22.3554	24.4201	23.241	24.9001	19.2079	NaN	NaN	19.5215	19.9146	19.7426	22.1026	21.331	21.6753	19.5919	19.7784	19.3739	18.8579	19.3857	19.4041	18.9514	20.3868	21.166	2	2	1	2	1	3	1	1	1	0	0	0	2	0
21.7402	21.8208	23.4794	23.3623	23.593	22.9282	23.6784	22.9363	24.3408	24.1144	22.5291	23.9396	22.552	23.9855	23.6896	23.5786	23.1211	23.5424	21.0308	20.7416	22.0065	21.7594	22.8443	20.0136	21.5152	21.1272	21.3448	20.6546	22.0875	22.3205	21.8366	21.9506	21.943	20.7425	22.4068	21.6184	0	1	2	2	1	1	2	1	2	2	2	2	1	2
NaN	NaN	NaN	18.7615	17.9952	19.638	NaN	NaN	NaN	20.1882	17.8861	18.3144	17.8182	18.9243	17.9652	NaN	NaN	NaN	NaN	NaN	NaN	NaN	NaN	NaN	NaN	NaN	NaN	NaN	NaN	NaN	NaN	NaN	NaN	NaN	NaN	NaN	0	0	0	0	0	1	0	0	0	1	0	0	0	0
23.4359	23.9294	23.8076	24.0692	23.762	24.1234	23.4644	23.0025	23.1929	23.9127	24.0319	23.6358	23.6898	24.258	24.0945	23.6494	24.1309	23.2267	21.5033	21.9676	21.6773	21.6158	21.6905	21.1144	22.509	22.7077	23.5445	22.1135	22.1013	21.5234	21.6943	21.8227	21.8059	22.7767	22.0653	22.0216	1	5	4	5	3	4	3	1	1	6	2	4	2	3
23.8018	21.8322	22.1089	21.6417	21.9178	21.6216	21.8247	21.7731	22.0836	21.8155	21.9163	22.1351	22.0096	21.6236	22.4177	23.4408	22.5544	22.9386	20.4785	20.7491	21.1495	21.1301	20.5598	21.4414	21.3162	21.4056	22.0979	21.0068	20.7007	21.2206	21.4997	20.9014	21.0535	21.1117	20.5187	20.0583	1	0	0	0	0	0	0	0	0	0	0	0	0	0
20.4513	20.4673	20.5045	NaN	NaN	20.4559	20.4957	20.6162	NaN	NaN	20.9107	20.4109	19.9991	NaN	NaN	20.4536	19.9673	20.2939	19.491	19.2973	19.098	19.4847	19.4569	NaN	NaN	20.0868	20.1238	19.1321	19.0762	NaN	18.9308	19.0819	NaN	19.4358	19.35	19.4761	0	0	0	0	0	0	0	0	0	0	1	0	0	0
18.8227	19.3272	19.4609	18.676	18.5637	18.5572	18.898	18.9136	19.3847	19.652	19.4043	19.2195	18.4209	19.1955	18.561	17.9028	NaN	NaN	23.8622	22.7259	23.6726	21.7862	22.0762	21.6958	NaN	NaN	NaN	22.7633	22.7213	22.3723	22.1027	21.2674	22.2442	20.8037	20.2221	21.1814	0	0	0	0	0	0	0	0	0	0	0	0	0	0
24.1151	23.3472	24.6232	25.4902	24.9288	24.628	27.1161	24.274	24.956	25.035	24.9144	24.2627	27.2202	24.4602	25.168	26.1249	25.0582	25.3424	NaN	NaN	NaN	NaN	NaN	NaN	21.4058	NaN	NaN	NaN	NaN	NaN	NaN	NaN	NaN	NaN	NaN	NaN	0	0	0	0	0	0	2	0	0	0	0	0	2	0
18.8774	19.0629	18.7691	NaN	17.8876	NaN	NaN	NaN	NaN	19.1171	NaN	NaN	18.4725	NaN	19.2403	18.6907	NaN	NaN	24.2016	24.8814	22.8399	24.5648	24.1967	23.4012	20.1034	21.0212	20.699	23.6006	24.7805	23.238	23.3163	24.9819	25.4204	23.815	22.2086	22.2516	0	0	0	0	0	0	0	0	0	0	0	0	0	0
19.8147	19.8795	19.783	20.3151	20.3265	21.0911	20.2087	22.2893	20.5118	20.2312	20.8499	20.6368	20.9373	19.9315	21.5672	23.5	23.0146	23.7736	NaN	NaN	NaN	NaN	NaN	NaN	NaN	NaN	NaN	NaN	NaN	NaN	NaN	NaN	NaN	NaN	17.3136	NaN	0	0	0	0	0	1	0	3	0	0	1	0	1	0
22.4985	21.6762	21.5631	21.513	22.1917	21.2837	20.054	20.6815	21.2888	21.4306	21.8899	21.5741	21.8713	21.5989	21.6899	22.8851	21.5914	21.7992	NaN	NaN	NaN	NaN	NaN	NaN	20.3465	NaN	NaN	NaN	NaN	NaN	NaN	NaN	NaN	19.3144	19.2242	NaN	1	0	0	0	1	0	0	0	0	0	0	0	1	0
NaN	NaN	NaN	NaN	NaN	NaN	NaN	NaN	NaN	NaN	NaN	18.3356	NaN	NaN	NaN	NaN	NaN	NaN	19.5452	19.1831	19.0349	18.8845	19.8117	19.3161	NaN	NaN	NaN	19.1391	19.2695	19.73	19.5425	18.7752	19.6144	19.3787	19.4362	19.0989	0	0	0	0	0	0	0	0	0	0	0	0	0	0
20.4755	20.8106	20.4393	21.2262	20.942	20.3728	20.4761	21.0861	20.4889	20.79	21.3219	20.699	20.5334	20.9131	21.1214	20.8877	20.3544	20.5376	20.2507	20.1334	20.0277	20.7366	20.0811	20.8251	NaN	NaN	NaN	19.7388	20.0171	20.545	19.8148	19.973	NaN	20.1678	20.1572	20.2459	2	0	0	1	1	0	0	1	0	0	0	0	0	0
19.7571	20.1539	19.8471	20.9727	19.9024	20.771	19.6032	19.7982	19.2711	19.8444	19.339	19.7318	19.3797	19.5018	19.3054	20.45	20.589	20.286	18.6868	19.0841	18.7658	19.5139	19.4409	20.4903	22.0539	21.6864	21.6195	19.3319	19.4287	19.2853	18.5399	19.0602	18.5957	20.5363	NaN	19.0393	0	0	0	1	0	1	0	0	0	0	0	0	0	0
19.4024	18.4986	NaN	NaN	NaN	20.2648	NaN	19.5216	18.106	NaN	NaN	19.0236	NaN	NaN	NaN	20.8579	21.5016	NaN	NaN	17.8285	NaN	NaN	NaN	NaN	20.4294	20.0414	20.6924	NaN	NaN	NaN	NaN	NaN	NaN	NaN	18.3409	NaN	0	0	0	0	0	0	0	0	0	0	0	0	0	0
20.8	21.1074	20.6897	20.6793	20.2666	20.6765	20.8977	20.6448	20.0748	21.0815	20.8191	19.7389	21.0242	20.5625	21.0304	20.4158	20.7062	20.4605	20.567	20.391	21.7115	21.1685	20.8037	20.2622	20.4773	21.6011	21.6289	20.5225	20.4699	20.2206	20.1326	20.7068	21.3951	20.1081	20.1642	20.6722	0	1	0	0	0	0	0	0	0	1	0	0	0	0
21.405	21.6978	20.9523	21.0817	21.1965	20.876	20.7434	19.937	20.8457	20.8101	20.897	20.6697	20.6476	19.9449	21.3751	21.3499	22.0345	21.4268	19.8456	20.4334	20.219	19.9347	20.3961	20.3655	22.0513	22.2923	21.5487	20.9496	20.4885	20.3006	20.2339	20.5799	20.3622	20.5166	21.2568	21.7093	0	1	0	0	1	0	0	0	1	1	1	0	0	0
20.9468	20.5443	20.2499	20.629	20.6965	20.656	20.7308	21.3507	21.7858	20.1299	20.5832	21.2435	20.3467	20.9925	21.0966	22.7239	21.5063	21.7507	19.9247	19.6774	21.2962	20.6888	21.8962	23.7057	22.6368	23.1026	22.8603	21.4602	21.2059	21.9941	22.0404	21.3422	22.3986	21.3549	21.8514	22.2272	1	1	0	0	0	0	0	1	1	0	0	1	0	0
NaN	18.4525	NaN	NaN	NaN	NaN	NaN	NaN	NaN	NaN	NaN	NaN	19.9027	NaN	NaN	NaN	NaN	NaN	21.6038	21.4785	21.1994	21.7745	21.0535	20.6155	NaN	19.3527	NaN	21.8467	21.7684	21.7845	20.6233	20.642	20.7999	20.4734	20.6776	20.4365	0	0	0	0	0	0	0	0	0	0	0	0	0	0
19.4759	19.5953	19.0095	NaN	18.7065	19.5169	18.9253	18.7121	NaN	19.1129	20.6423	NaN	19.1687	NaN	NaN	19.6923	NaN	19.7932	NaN	18.9355	19.0106	19.7383	19.3615	19.3127	19.8994	19.36	20.0787	18.7945	19.2155	NaN	19.525	18.8982	19.1516	19.988	NaN	NaN	0	0	0	0	0	0	0	0	0	0	0	0	0	0
18.5173	18.7175	NaN	20.1962	19.9303	19.9985	20.3649	19.506	20.2196	19.75	21.7186	19.7865	NaN	18.9905	19.65	18.7785	NaN	22.7897	NaN	NaN	17.4096	17.4687	17.4635	NaN	NaN	NaN	17.0156	NaN	17.557	17.1028	NaN	NaN	NaN	17.4844	NaN	NaN	0	0	0	0	0	0	0	0	0	0	1	0	0	0
22.9227	23.5153	23.1394	22.2062	22.976	22.2699	22.3069	21.8795	22.2062	22.7119	22.7957	23.1553	21.3311	22.557	21.8072	22.0975	22.9433	22.6712	24.697	24.4719	24.6088	24.394	23.8001	25.3591	23.9996	25.1402	24.646	23.508	23.602	24.4136	23.5492	23.2626	23.1287	24.324	23.7565	24.1315	1	1	0	0	1	0	0	0	0	1	0	1	0	1
21.1579	20.6228	20.8153	20.4619	20.6741	20.6895	20.7315	20.8274	20.9098	20.4186	NaN	20.5988	20.4328	20.4484	20.6143	20.4489	20.594	21.1323	22.219	21.3686	21.6566	21.4647	21.8408	21.3507	20.9175	22.5277	21.3409	22.806	22.0056	22.0257	21.3913	20.1486	22.6579	22.8865	21.5111	23.0168	0	0	0	0	0	0	0	0	0	0	0	0	0	0
23.7258	23.4973	24.1531	24.5654	23.9098	23.478	24.1524	23.9664	24.4962	23.6798	23.4892	23.431	22.743	23.6126	23.781	23.5074	23.7486	23.6078	21.6685	21.3865	21.6059	22.1283	22.9018	21.1468	23.6393	23.1533	22.943	22.5898	22.4393	23.2822	22.1553	22.4069	22.8883	23.924	24.1658	23.6795	1	1	4	2	2	1	2	4	5	2	3	1	1	2
28.2089	28.1153	28.2405	29.2521	29.4124	28.9692	25.8375	25.9072	26.3729	28.9964	27.6102	27.7643	28.6388	28.7031	27.7396	26.0272	26.8306	25.8387	24.2242	24.4187	24.3549	25.003	25.7791	24.7819	26.3282	26.1323	25.5983	24.7532	25.2021	25.4569	25.4573	24.9226	25.2271	25.1501	25.919	25.5075	5	6	4	9	8	11	3	3	3	10	6	8	6	10
NaN	NaN	NaN	20.2262	NaN	20.2467	NaN	20.0477	20.0426	20.0505	NaN	19.8709	19.3542	19.9604	NaN	20.4899	19.8066	20.4077	NaN	NaN	NaN	NaN	NaN	19.1614	NaN	NaN	NaN	NaN	NaN	NaN	NaN	19.1864	NaN	NaN	19.8145	19.1302	0	0	0	0	0	0	0	0	0	0	0	0	1	0
21.4669	22.34	20.1768	20.0938	20.0737	20.3137	20.52	20.2601	20.6622	20.0882	19.7976	19.844	19.9167	NaN	20.0462	19.6754	21.9886	21.6313	19.4754	19.9138	19.4614	19.6664	19.8119	19.5112	21.5315	20.7147	20.3673	19.5051	19.827	19.2383	19.6207	19.2814	19.4695	21.1209	20.2019	20.3021	1	2	0	0	0	0	0	0	0	0	0	0	0	0
25.536	25.3986	25.2738	24.8301	25.0432	24.726	25.0215	25.211	25.6425	25.5805	25.0021	25.13	25.3743	24.8944	25.2313	26.3849	25.9882	26.4101	22.2462	22.6494	23.1145	23.4477	22.7022	23.1181	24.6881	24.5814	24.3822	22.6704	21.633	21.9642	22.3743	22.5243	22.2881	23.4939	23.9108	22.9953	6	4	5	3	2	2	2	5	5	3	4	2	4	3
NaN	19.0694	18.492	18.6236	18.5865	18.445	19.1788	19.3259	20.092	18.8407	19.345	18.8966	19.3469	18.9592	19.1024	19.1757	NaN	20.0523	17.5931	NaN	NaN	18.8869	18.7264	18.9054	NaN	NaN	NaN	19.2171	18.9828	19.8821	19.0633	18.2314	18.6484	18.1755	18.5486	19.2575	0	0	0	0	0	0	0	0	1	0	0	0	0	0
NaN	NaN	NaN	NaN	NaN	NaN	NaN	NaN	NaN	NaN	NaN	NaN	NaN	NaN	NaN	NaN	NaN	NaN	17.4713	17.0292	16.8331	16.3823	16.3469	NaN	17.3807	17.3412	18.4945	17.0788	17.2131	16.8665	17.5189	17.1283	17.0032	17.1074	17.0694	17.2434	0	0	0	0	0	0	0	0	0	0	0	0	0	0
23.9087	24.6605	25.25	24.9042	24.9336	25.1199	26.176	25.7337	26.7176	25.3236	25.3698	25.6169	24.9801	24.8794	25.0972	24.1816	24.466	24.259	23.2522	22.8803	23.9726	24.0571	24.3794	24.0077	23.2724	23.4233	23.0342	24.1349	24.3886	24.7084	24.5847	24.1199	24.8402	24.0791	24.2177	24.0719	2	3	5	5	4	5	5	5	4	3	5	3	3	4
27.379	27.4749	27.0809	27.0863	27.1583	27.3217	27.3441	27.1833	26.6106	27.4175	27.0998	27.2089	27.6893	27.4023	27.5765	27.7174	27.7637	27.1653	29.7538	29.4751	28.24	29.4277	28.6965	28.9225	27.6405	26.6477	28.1292	29.3655	28.9855	29.1727	28.2038	29.5302	28.9515	28.9549	28.1966	28.1794	5	5	5	2	4	4	3	2	3	1	3	4	3	3
NaN	NaN	NaN	NaN	NaN	NaN	NaN	NaN	NaN	NaN	NaN	NaN	NaN	NaN	NaN	NaN	NaN	NaN	19.5875	NaN	NaN	19.2567	19.6864	23.3291	NaN	NaN	NaN	19.3375	NaN	NaN	19.4988	19.9402	NaN	19.691	19.591	19.3941	0	0	0	0	0	0	0	0	0	0	0	0	0	0
24.9592	25.513	25.1943	24.2223	24.4437	24.1492	24.4944	23.8696	24.0724	24.3768	23.6461	24.032	24.5151	23.9778	24.6731	23.7855	23.3218	23.2716	23.055	22.7776	24.3368	23.0724	22.6297	24.6082	21.6112	22.4836	22.9541	23.161	22.5767	22.7038	22.3251	22.0496	23.036	22.0275	22.8486	22.1825	4	5	3	5	6	2	2	2	1	4	1	1	2	2
24.2843	24.2878	23.7777	23.8034	23.7093	23.4658	24.3114	24.18	24.6248	24.3235	24.3239	24.1726	23.9473	24.176	24.3054	24.9628	25.2048	25.3828	23.193	23.1185	22.8557	23.0884	22.6637	22.2984	24.7888	24.66	24.962	22.6335	22.9977	22.9775	23.6012	23.4256	22.8822	23.7569	23.898	24.2055	3	4	2	1	0	1	2	2	3	3	2	3	1	2
20.5222	19.8974	19.8485	20.1338	20.5557	20.0599	20.1176	20.089	21.2738	20.3443	21.2643	20.1625	20.8501	20.4392	20.5677	22.4586	21.2368	22.3002	NaN	NaN	NaN	18.2336	NaN	NaN	19.0741	NaN	NaN	NaN	18.7922	NaN	NaN	NaN	NaN	18.1357	18.0147	18.3166	1	0	0	0	1	0	0	0	2	1	1	0	0	1
20.0055	20.2412	NaN	NaN	NaN	NaN	NaN	19.627	NaN	19.4388	18.6236	19.5974	19.4541	NaN	NaN	NaN	19.4735	NaN	20.3967	20.2399	20.2236	20.8249	21.8057	21.2121	21.346	22.1469	22.3792	20.5238	20.6431	20.8474	21.313	20.2719	22.2981	21.2181	21.6142	21.3001	0	0	0	0	0	0	0	0	0	0	0	0	0	0
NaN	21.8375	21.4533	NaN	NaN	22.3643	20.5399	21.0668	23.0124	21.0253	20.4737	NaN	20.4933	NaN	NaN	22.0908	22.2741	22.3554	20.6184	20.4865	22.8378	19.6106	19.9567	20.8721	23.4808	21.2193	21.8893	19.3789	20.0431	20.9708	20.5887	20.7151	21.0802	19.8422	21.3922	21.0133	0	1	0	0	0	0	0	0	1	0	0	0	0	0
22.907	22.5031	22.3474	22.2584	21.955	22.7277	22.6193	22.6957	22.2579	23.1998	22.7159	23.3253	22.7304	23.0571	22.2223	21.955	21.9089	22.0378	24.5658	25.4018	24.8755	24.531	24.5142	25.1545	25.5832	25.3645	26.0271	24.3541	24.0056	23.6327	23.8683	23.937	24.5809	24.2294	24.6447	24.9743	1	0	0	0	0	1	0	1	0	1	1	2	1	1
NaN	NaN	21.0431	NaN	NaN	NaN	NaN	NaN	NaN	21.0051	20.8843	NaN	21.6529	21.4092	21.6219	21.7042	21.7261	21.5721	22.4537	21.3378	21.9926	22.3461	21.8672	22.9422	19.9057	21.2597	21.4837	21.7716	21.9671	21.5422	21.0737	21.5466	21.7193	20.8392	20.7188	20.5297	0	0	0	0	0	0	0	0	0	0	0	0	0	0
22.0454	21.8079	21.4904	21.4235	21.7759	21.7064	21.6856	22.1901	21.9255	20.4149	21.4209	22.5225	21.6814	19.9552	21.9635	22.2854	20.854	21.7123	24.8928	24.6648	24.3204	24.1194	24.1251	25.4091	26.2055	26.0033	26.6482	24.0759	23.8867	23.9354	24.3647	24.3316	23.8544	24.3242	24.7249	24.597	0	0	0	0	1	0	0	0	0	0	0	0	0	0
NaN	NaN	NaN	NaN	NaN	NaN	NaN	NaN	NaN	NaN	NaN	NaN	NaN	NaN	NaN	20.4715	21.0993	20.6395	NaN	NaN	NaN	NaN	NaN	NaN	22.3476	22.4263	22.3305	NaN	NaN	NaN	NaN	NaN	NaN	NaN	NaN	NaN	0	0	0	0	0	0	0	0	0	0	0	0	0	0
27.4263	27.6093	28.6349	27.7732	27.4898	27.5334	27.7943	26.9802	26.6786	26.4282	25.8189	25.1603	26.9786	25.8244	25.0332	25.7004	25.2071	26.1733	NaN	NaN	NaN	19.4537	18.4146	20.4745	NaN	NaN	NaN	22.6877	18.6473	22.8755	NaN	NaN	NaN	NaN	18.223	NaN	9	5	6	7	6	6	7	4	2	4	4	1	5	2
18.7894	18.8986	19.5587	19.6433	19.0786	19.3919	19.6918	19.389	19.5632	18.8455	18.8445	NaN	19.2709	19.0127	19.0908	18.8953	18.8398	18.9792	NaN	NaN	NaN	NaN	NaN	NaN	21.4033	21.7503	21.2539	NaN	NaN	NaN	NaN	NaN	NaN	NaN	NaN	18.801	0	0	0	0	0	0	0	0	0	0	0	0	0	0
23.1806	22.4012	22.1634	23.1215	24.2037	23.4251	24.3365	24.853	23.8296	21.9426	21.7581	22.5295	22.306	22.0887	22.6166	25.0399	26.0907	26.1065	20.3042	NaN	NaN	NaN	NaN	NaN	23.3592	23.402	22.7575	NaN	NaN	NaN	20.8039	20.9101	NaN	20.7509	21.244	20.5209	0	0	0	0	1	0	1	2	1	0	0	0	0	0
25.1469	25.2004	24.9657	25.2426	25.3481	25.3946	25.153	25.2876	25.041	25.2732	25.5285	25.0401	25.3964	24.8209	25.05	25.5577	26.2702	26.0039	24.4435	24.8789	25.2388	25.3884	24.9983	25.2516	27.0887	27.2451	27.3753	25.2883	25.1384	24.7447	24.7692	24.7187	24.8416	25.466	25.2123	25.3355	5	4	5	6	7	6	6	5	3	6	6	6	7	5
22.1049	21.6062	21.8014	20.7149	20.5476	20.358	20.1981	20.6576	NaN	20.8488	20.6899	19.1179	20.6107	20.6893	20.8331	20.1996	22.4447	20.429	20.3776	19.8385	20.398	20.4065	19.73	21.2759	21.7072	21.9105	21.9573	20.3618	20.4539	20.1377	20.0629	19.9891	19.606	20.4679	20.3943	20.4685	1	1	0	1	0	0	0	0	0	0	0	0	0	1
23.9142	23.4405	23.5705	22.647	22.881	22.8514	22.7907	22.2575	22.1951	22.0039	22.222	20.7501	22.1655	21.0035	21.0346	22.217	20.1754	21.4923	NaN	NaN	20.0552	20.9481	19.8167	NaN	19.2827	NaN	19.7284	20.2303	20.6362	20.1502	17.3356	NaN	20.9614	NaN	19.8976	20.4584	4	2	2	1	1	1	1	2	0	1	1	0	1	0
23.4773	23.9341	23.9357	21.8726	22.5446	22.8611	20.3616	19.0479	20.6301	20.0088	20.511	20.6534	21.341	20.8057	NaN	19.9925	20.6929	21.8106	25.2959	25.6188	26.3343	26.7214	26.8781	26.974	26.1628	26.0527	25.2579	26.4761	26.7939	27.631	26.8386	27.0076	27.5923	26.402	26.7623	26.1971	1	1	1	1	1	1	1	0	1	0	1	2	1	1
NaN	NaN	NaN	NaN	NaN	NaN	NaN	NaN	NaN	NaN	NaN	NaN	NaN	NaN	NaN	NaN	NaN	NaN	19.5841	18.695	18.5883	19.5903	18.9758	NaN	NaN	NaN	NaN	18.8823	19.1522	18.4231	NaN	NaN	18.737	18.5297	NaN	NaN	0	0	0	0	0	0	0	0	0	0	0	0	0	0
23.0562	23.3111	22.6712	22.5221	22.5777	22.5966	23.6105	22.7692	22.5445	22.1375	21.7177	22.0027	22.892	22.2751	22.6879	19.982	NaN	NaN	23.2494	22.4183	22.4573	22.3829	21.8497	21.2134	20.5045	21.8851	21.0064	22.6089	22.2038	21.6603	21.6934	22.2884	22.4243	21.3837	21.2325	21.1362	2	1	2	0	1	1	3	2	1	1	1	0	1	0
NaN	NaN	NaN	NaN	NaN	NaN	NaN	NaN	NaN	NaN	NaN	NaN	NaN	NaN	NaN	NaN	NaN	NaN	NaN	NaN	NaN	NaN	NaN	NaN	21.6667	20.9863	20.5666	NaN	NaN	NaN	NaN	NaN	NaN	NaN	NaN	NaN	0	0	0	0	0	0	0	0	0	0	0	0	0	0
23.5512	23.5165	22.8167	23.3711	23.2422	23.4873	23.6618	25.3554	22.8055	23.2646	22.5738	23.104	22.6824	22.7595	23.7627	24.9557	24.6507	26.1836	21.9211	21.7525	21.3028	21.5038	21.5663	23.0098	22.3978	23.1724	22.7321	21.9371	21.1117	21.2294	21.0863	21.122	20.6667	22.7949	22.1739	21.6244	5	3	1	2	2	3	4	4	2	2	1	1	1	2
18.9711	19.8373	NaN	19.4312	19.3772	19.6545	19.3632	15.8283	18.761	19.3408	18.4616	19.2749	NaN	19.5076	19.2297	19.0099	19.0272	19.2106	23.9644	23.6916	23.4034	23.9893	24.2651	23.9265	24.9278	24.7764	24.9972	23.6627	23.7384	23.8882	23.9206	24.0615	23.5601	24.6682	24.3165	24.4818	0	0	0	0	0	0	0	0	0	0	0	0	0	0
19.1625	18.8225	18.9195	18.8476	18.9351	19.3274	19.0378	19.0927	19.2441	19.2422	18.9761	18.9964	19.1748	19.2066	18.6966	19.2723	19.6669	18.9454	19.7833	20.1732	19.3265	20.8329	19.6976	19.8135	21.9888	21.8017	22.1982	19.7133	19.6164	19.2716	19.215	19.508	NaN	19.897	19.721	19.9029	0	0	0	0	0	0	0	0	0	0	0	0	0	0
22.6549	23.1014	21.9465	21.9642	21.7538	21.8867	21.8959	21.5728	21.9211	23.1022	21.494	22.5844	21.3284	21.494	21.6433	21.4339	21.9294	24.1861	20.5923	20.3794	19.801	19.4982	19.3347	20.0674	19.542	20.1421	20.3867	19.2648	19.5126	19.5528	19.1856	19.3648	19.0012	20.0006	20.234	20.0184	3	2	0	0	0	0	1	0	0	1	1	1	0	0
NaN	21.0489	20.9774	22.2473	21.9416	22.0164	21.3985	22.7055	22.782	23.7482	22.4716	23.3377	21.2441	23.8807	22.2181	22.8185	22.6533	22.768	23.8188	24.3832	23.9524	25.2869	24.9881	24.7071	24.1755	24.4313	22.7074	26.041	25.8215	25.3512	24.9797	25.6372	26.0181	24.9578	25.2257	24.8948	0	1	0	0	0	1	0	1	0	2	0	2	0	1
28.0621	28.4201	28.1011	28.4895	29.0049	28.8276	29.3309	28.6592	28.276	28.4335	28.2951	28.0936	29.4355	28.6249	28.5899	27.1939	27.282	27.027	28.0619	27.7696	28.6084	28.0351	28.1018	28.3882	26.7142	26.8362	26.4429	28.5234	28.308	28.0882	27.8433	27.7194	28.3094	27.4869	27.3547	27.3582	18	21	20	19	26	28	33	28	14	16	16	14	34	20
25.8429	25.8334	25.5122	25.2176	25.1249	25.2843	25.1658	25.2942	24.9141	25.0784	25.2316	25.186	24.7889	24.7231	24.7229	25.8688	26.0007	25.5672	24.638	24.2568	23.1174	23.9095	23.3072	22.9688	25.0536	24.8883	24.9731	23.7862	23.47	23.0294	23.1897	23.5872	23.2676	23.7182	23.5216	23.4681	6	7	5	5	6	2	4	5	3	3	6	3	4	1
25.6616	24.6924	26.0863	24.3892	24.955	25.2317	24.9691	25.6858	25.8144	25.284	26.0644	24.7667	24.9372	25.9705	24.873	23.9255	23.567	24.8836	26.3596	26.5384	28.2208	26.0733	26.5015	27.9624	26.0145	26.1939	25.7401	25.8038	26.0274	26.1949	26.6396	26.8576	25.8879	25.9435	26.2215	25.5895	7	2	7	4	2	4	2	5	4	3	5	4	4	4
21.1161	21.1845	20.0501	19.1146	19.662	NaN	20.0114	19.8499	20.6623	20.2749	20.5536	19.8287	21.0066	20.3659	21.2298	19.153	18.8964	NaN	23.2838	22.9794	23.5659	23.2393	24.0552	21.5874	20.1563	20.0616	19.8932	23.747	23.8925	23.8159	22.5703	22.3455	24.0533	23.3708	21.6627	21.8032	0	0	0	0	0	0	0	0	0	0	0	0	0	0
NaN	NaN	NaN	20.4904	20.5832	21.6621	19.135	21.328	20.0589	20.6503	21.2316	20.0721	20.7429	21.2378	20.8166	NaN	NaN	NaN	21.6691	21.3714	18.0129	20.0538	20.8526	NaN	NaN	NaN	18.5565	20.3488	20.4448	20.5497	20.1441	20.594	20.6351	21.0471	19.8614	18.7015	0	0	0	1	0	1	0	1	0	0	1	1	0	0
19.0145	20.2035	20.4515	19.4785	20.7308	19.1769	19.5634	22.2744	22.9225	20.4468	20.9158	19.9176	21.7819	19.9288	19.6201	23.309	23.8093	24.2322	18.7944	18.8771	19.2959	18.3276	18.6708	18.7962	19.1335	19.493	19.6558	18.0192	19.2497	19.2448	19.2764	18.618	18.0798	19.393	19.2671	19.4724	0	0	0	0	0	0	0	1	2	0	0	0	1	0
26.903	27.0149	26.8542	26.7783	26.9715	26.7876	27.2404	26.904	26.5307	26.5219	26.5757	26.5539	26.6377	26.3021	26.6833	26.6791	26.874	26.9615	27.4521	27.8791	27.3283	27.3209	27.2307	27.568	28.6473	28.4031	28.8934	27.2625	27.2369	27.2333	27.6887	27.6225	27.3622	27.8581	27.8339	27.934	5	6	6	6	8	10	9	5	5	2	3	4	8	5
24.0943	23.9767	23.8728	23.7666	23.8115	23.6518	24.0211	24.2576	23.6401	23.7116	23.0684	24.2429	23.731	23.3893	24.1347	24.0008	23.1716	23.642	26.9496	26.1086	25.7396	25.9324	25.162	24.9127	24.057	23.9228	24.483	25.8315	25.6419	26.1959	25.6917	25.9196	26.1713	25.816	25.436	25.2666	1	1	1	1	2	1	1	1	1	1	1	2	1	1
22.5866	22.8589	22.7466	22.6329	22.7624	23.0389	22.116	22.3281	22.3959	22.6068	22.6565	22.2031	22.4268	22.4523	22.45	23.2973	23.1994	23.2347	20.0909	19.787	19.9344	19.9143	19.3783	20.0678	NaN	19.3586	19.1738	19.1362	19.4967	22.7888	19.5882	19.2008	18.5578	19.245	19.1785	19.4742	2	2	2	2	2	3	1	1	2	1	2	1	2	1
19.5674	20.6453	20.2383	19.0324	20.2938	18.2293	20.1893	20.7796	21.2047	22.1152	21.5545	22.0733	21.0047	22.0552	21.6911	21.5108	22.1409	21.0767	21.1613	22.2194	22.7313	23.5431	22.985	23.4679	24.6688	24.4326	23.9782	23.2808	23.6532	23.9201	23.8581	24.0929	23.8017	24.1999	24.4351	24.1798	0	0	0	0	0	0	0	0	0	1	1	1	0	2
22.7401	22.7569	22.7001	22.4905	22.5158	23.036	23.3477	23.2329	21.5246	22.2718	22.2088	22.4516	22.1608	22.0719	21.8073	22.6663	23.4519	23.6204	21.318	21.0317	20.1705	21.0451	22.0477	21.6211	22.1063	21.9673	22.1212	20.3738	21.1458	21.62	21.5724	21.179	20.619	22.212	21.3743	22.3542	1	1	1	1	1	2	2	3	0	1	0	1	1	1
NaN	NaN	NaN	NaN	NaN	NaN	NaN	NaN	NaN	NaN	NaN	NaN	NaN	NaN	NaN	NaN	NaN	NaN	19.8921	19.2591	19.7116	20.1806	20.0076	20.3167	21.5869	21.7151	21.9582	20.1526	20.0785	19.8288	19.8286	19.817	19.319	20.2552	19.8508	19.8702	0	0	0	0	0	0	0	0	0	0	0	0	0	0
25.1351	25.1314	24.268	23.9145	23.8333	24.1191	23.9073	24.1328	24.1713	24.449	24.5518	24.5786	24.3346	24.3285	24.1562	25.5347	25.296	25.0465	23.8519	23.6634	23.6434	24.6411	23.6401	24.8768	22.8178	23.0395	23.0495	23.7203	23.723	24.2263	23.1705	23.467	23.1855	23.3309	22.5569	22.5958	2	6	1	2	2	4	1	1	1	1	1	2	4	1
19.4535	20.4027	19.7182	19.5936	19.0156	19.3908	20.831	20.6895	19.6122	19.9772	19.5917	19.8666	19.9333	19.3836	20.1148	24.9608	25.0395	24.1	NaN	NaN	NaN	NaN	NaN	NaN	NaN	NaN	NaN	18.5907	NaN	NaN	NaN	NaN	NaN	NaN	NaN	NaN	0	0	0	0	0	0	0	0	0	0	0	0	0	0
19.1727	18.9928	19.0721	19.104	19.0786	18.9017	18.5585	19.1728	19.323	19.4846	19.5491	19.6837	19.0661	19.4749	19.0483	19.8875	18.7662	19.2592	NaN	NaN	NaN	18.3689	18.0304	18.5858	19.4449	19.6546	20.0152	NaN	18.2485	NaN	17.7193	18.4099	17.4509	18.5834	NaN	18.6648	0	0	0	0	0	0	0	0	0	0	0	0	0	0
20.0106	20.6256	21.598	21.7437	19.9408	19.9559	20.0249	19.8984	19.8051	21.445	19.6865	20.0997	19.6462	21.5316	19.3374	19.9411	20.0624	19.2699	20.3076	20.6676	20.1451	20.4088	20.6234	21.7856	23.054	23.5043	25.4023	20.6686	20.581	20.1573	20.2957	20.0192	20.0389	22.1675	21.0538	22.9369	0	0	0	1	0	0	0	0	0	0	0	0	0	0
NaN	NaN	NaN	NaN	NaN	NaN	NaN	NaN	NaN	NaN	NaN	NaN	NaN	NaN	NaN	NaN	NaN	NaN	18.7627	19.5991	18.2041	19.1725	18.6759	18.4146	19.5841	20.7692	21.2255	17.8272	18.2668	17.8256	18.5819	17.494	18.2386	19.8718	19.3248	20.629	0	0	0	0	0	0	0	0	0	0	0	0	0	0
19.1065	18.9098	19.415	19.7405	19.2562	19.4961	19.3931	20.3646	20.9307	20.7552	19.6353	19.1439	20.4671	20.6073	19.2028	NaN	NaN	19.2249	NaN	NaN	18.3934	17.0703	NaN	NaN	NaN	NaN	NaN	NaN	17.1809	16.9978	NaN	17.3147	NaN	NaN	NaN	17.1084	0	0	0	0	0	0	0	1	1	1	0	0	1	1
20.0184	19.9756	19.6482	19.6859	19.6632	19.6599	19.7987	20.4835	19.789	20.3699	20.8042	19.9139	20.3906	19.7021	20.5174	22.151	22.6351	22.1222	20.3163	19.7112	20.8117	19.8942	19.9142	20.0993	20.6979	21.7865	20.766	19.4886	19.1255	19.7723	19.1975	19.327	19.1689	21.3276	19.7685	19.9736	0	0	0	0	0	0	0	0	0	0	1	0	0	0
23.0371	23.3151	23.4851	23.7598	23.4696	22.9637	22.8587	22.8386	23.8938	23.8178	23.9404	23.6251	23.2707	23.9533	24.3385	23.5927	23.5876	23.1918	21.5814	21.8352	23.5753	21.8459	22.3195	23.4143	22.3704	22.1992	21.1174	22.6519	22.6417	23.4189	23.8005	23.4806	22.9725	22.601	22.8924	22.4245	1	2	1	0	0	0	1	2	2	0	3	1	1	1
23.418	23.3703	25.0605	24.0303	23.3708	23.2809	24.7346	23.6192	23.6448	25.7704	24.0412	24.3316	24.3523	24.1494	23.7026	23.1534	23.2255	22.9313	18.6925	19.734	18.8497	18.9301	18.1436	19.8196	NaN	17.9391	NaN	NaN	19.0559	19.0895	NaN	NaN	19.6234	18.8599	19.2676	18.9467	2	1	3	3	2	3	6	5	4	5	2	3	5	4
22.5948	22.8067	23.0107	21.5573	21.4718	21.1997	22.474	20.757	21.3513	22.0725	21.6897	22.1212	21.816	21.2023	20.8196	21.0964	21.5206	20.9151	NaN	NaN	19.4436	NaN	20.0664	19.875	19.3061	19.9117	NaN	NaN	NaN	NaN	NaN	NaN	19.2481	NaN	NaN	NaN	1	2	2	2	2	1	2	0	0	3	0	1	1	0
21.9218	21.2249	22.6409	23.2376	22.8267	22.7919	22.3167	23.7005	23.4376	21.453	22.0132	24.3596	20.5591	21.7607	23.341	24.2274	26.5127	25.555	NaN	20.7048	NaN	20.6962	18.9437	NaN	20.3174	NaN	19.1212	18.1162	NaN	20.1554	18.2289	18.1494	19.8191	18.9364	18.8311	19.41	1	0	1	1	1	1	1	2	1	0	0	2	0	0
23.0654	23.5568	23.0546	21.8226	22.5348	22.2201	23.4968	23.028	22.4943	23.264	23.418	23.1543	24.0522	23.4086	23.0646	22.4394	22.3551	22.4277	22.6794	21.7228	24.0452	22.1377	22.4414	22.9719	NaN	NaN	NaN	22.3987	22.2783	22.3544	23.7767	22.6616	22.7153	22.2982	21.8987	21.8867	1	1	0	0	0	0	1	1	0	0	1	0	2	1
22.8407	23.2515	23.8274	23.5522	23.0718	23.4246	25.7559	25.3453	25.08	25.1829	24.9076	24.9632	24.5565	24.9717	24.619	22.2941	22.7992	22.2993	NaN	NaN	NaN	NaN	NaN	NaN	NaN	NaN	NaN	NaN	NaN	NaN	NaN	NaN	NaN	NaN	NaN	NaN	2	2	1	1	1	1	5	3	2	3	3	4	3	2
21.1786	20.6871	21.1429	20.7992	20.8803	20.7625	21.488	21.2132	21.7375	20.6853	NaN	21.1038	20.8238	21.6469	20.3061	20.6864	NaN	20.2262	19.7624	NaN	20.7188	20.1303	19.9337	21.7015	19.9724	19.2659	20.2283	20.2051	19.983	20.864	NaN	NaN	19.9934	NaN	NaN	NaN	0	0	1	0	1	1	1	1	1	1	0	0	1	1
23.0278	23.2259	23.1227	23.7204	23.4613	23.1405	23.6892	23.0804	24.3268	23.7731	24.3269	23.7281	22.9441	23.8304	23.3385	23.4618	22.822	23.2562	21.5796	21.8368	21.8317	21.9559	21.7809	22.2229	21.6156	22.4081	22.5578	21.3608	21.6062	21.8227	21.5952	21.6853	21.1397	22.111	22.3456	22.3874	2	2	2	2	3	3	3	2	5	1	3	5	3	2
23.1902	23.4166	23.0547	23.0333	22.4949	23.1283	22.8314	23.114	22.8563	23.0157	22.4249	22.6367	22.1224	22.5171	21.3199	23.4591	23.5957	23.8328	19.3558	19.2519	18.8519	19.4916	19.1167	19.0484	19.2756	18.9837	18.6851	19.0111	18.9487	19.3013	17.9643	19.2751	18.8609	19.1716	18.1626	18.6384	3	3	2	3	1	2	2	3	2	2	2	1	2	2
17.7937	NaN	NaN	NaN	NaN	NaN	NaN	NaN	NaN	NaN	NaN	NaN	NaN	NaN	NaN	18.6819	18.2488	19.3393	25.8327	25.5065	27.3955	27.5964	26.7273	28.0647	24.4825	24.3689	23.8717	25.9399	25.9601	27.235	25.6173	25.3978	26.3544	24.8721	25.7174	24.7342	0	0	0	0	0	0	0	0	0	0	0	0	0	0
23.284	23.4011	24.2076	24.6519	25.0683	23.981	25.8849	25.2196	28.1719	25.8482	25.7647	26.6718	25.505	25.9894	26.4132	24.4717	24.4595	24.329	18.0199	NaN	19.521	20.4695	21.0559	NaN	19.2869	20.1383	19.8715	17.4197	20.5708	17.1237	20.3726	20.0247	19.632	21.3473	20.7015	20.2941	2	2	1	1	2	0	1	1	2	1	4	2	4	1
25.6589	25.5108	25.2278	24.9491	25.1193	25.3002	24.9675	25.1272	24.76	24.9935	25.3145	25.1416	24.982	24.9244	25.1379	26.0658	25.9536	26.6465	24.2963	24.4715	24.0659	23.6581	23.6659	24.304	25.4386	25.1536	25.6923	23.5283	23.6204	23.4948	23.2067	23.4109	23.4121	23.7167	24.0933	23.9748	4	4	3	3	3	3	1	2	2	2	3	2	3	2
27.8676	27.9625	28.1025	28.0755	28.1755	28.203	27.6273	28.1161	28.6149	28.1172	28.5131	27.9658	28.0775	28.731	27.8752	27.5549	27.3843	27.4285	29.3563	29.3773	29.9375	29.5029	29.719	29.9231	28.9622	28.9698	28.7108	29.6591	29.748	29.8754	29.9137	29.9328	29.5941	29.548	29.5507	29.456	24	33	28	28	31	29	17	33	44	26	48	18	28	47
20.431	20.5812	20.2632	20.3216	20.2128	19.3997	20.3982	20.1724	20.3535	19.7715	19.9644	20.5663	19.6381	20.1014	20.4491	19.9895	20.3887	21.4186	19.7544	19.7574	19.5673	20.0875	20.0228	19.9658	19.8016	20.8586	20.5811	19.8223	20.1029	19.7813	20.0036	20.3358	20.1634	20.6512	20.1576	20.3817	0	0	0	0	0	0	0	0	0	0	0	0	0	0
23.7182	23.6423	23.4103	22.1697	22.1302	22.5317	23.3818	23.0127	22.7477	22.067	22.9248	22.0534	21.7186	22.9264	22.3455	23.1786	23.2818	22.7185	22.253	21.3011	21.5785	21.6107	20.4674	22.0203	22.0764	21.571	20.2817	20.0611	20.5914	20.7771	20.416	20.8623	19.8844	20.9147	20.369	20.8631	2	5	4	0	2	1	1	5	2	1	3	1	0	2
19.9858	20.1011	20.245	20.0926	19.6577	20.0043	20.348	20.655	20.5337	21.3469	21.589	21.4783	21.6456	21.5316	21.4274	21.4322	21.1578	19.9491	18.5913	17.5798	16.9686	19.0247	19.4705	NaN	17.7477	NaN	17.8101	18.6822	19.9445	17.6731	18.1702	19.0154	18.9555	18.6564	19.1979	NaN	1	1	1	1	0	1	2	2	1	1	1	2	2	2
25.8582	25.9713	25.8064	25.7315	25.601	25.8295	25.6892	25.9053	25.8498	25.9203	25.9274	26.0575	25.4132	25.9856	25.9495	26.7382	26.8019	26.852	24.8015	25.0535	24.2686	24.9508	25.1382	25.4308	25.2733	25.6438	25.6358	24.8338	24.4182	24.3861	24.5009	24.5297	24.2679	25.2568	24.9337	25.3574	6	5	6	7	4	7	3	9	1	5	5	4	6	4
21.7867	21.3793	22.419	23.0928	22.8944	22.9283	22.1463	22.3279	22.4645	21.7365	22.0613	21.5852	19.4242	19.7061	19.1104	22.057	20.5109	22.1188	NaN	NaN	NaN	NaN	NaN	NaN	NaN	NaN	NaN	NaN	NaN	NaN	NaN	NaN	NaN	NaN	NaN	NaN	1	0	2	2	1	1	1	3	1	1	2	0	0	0
22.7359	21.9293	NaN	21.5706	21.5573	21.7991	22.7789	22.0464	21.7525	21.7809	21.8005	22.0046	22.0556	21.2973	21.7866	23.7217	25.2804	25.1895	20.7054	20.8586	21.1672	20.6811	20.8769	21.705	23.1389	23.7975	23.7557	20.5577	20.6132	20.2867	21.0631	20.8133	20.7072	21.1696	21.566	22.8187	1	0	0	0	0	0	0	0	0	0	0	0	0	0
19.3967	19.8813	19.6506	19.3589	19.6834	19.4764	19.4447	19.4944	19.1194	19.9701	19.475	NaN	19.6897	19.5488	19.5337	19.6588	19.5217	19.6592	21.1799	20.3551	20.0725	20.1933	20.1541	20.0257	20.9611	21.0046	21.3627	20.393	20.1882	19.8258	20.0886	20.1151	19.5873	20.4215	21.0852	20.4973	0	0	0	0	0	0	0	0	0	0	0	0	0	0
26.5812	26.3093	26.3833	26.4885	26.5095	26.3055	26.2003	26.0032	26.0817	26.7287	26.3993	26.424	26.4963	26.8425	26.1508	25.8028	26.2846	24.8525	25.1718	25.1073	25.5181	24.8534	25.2282	25.3532	24.107	23.4509	24.5793	25.4902	24.8985	25.5001	25.1629	24.6455	25.241	24.6681	25.0928	25.0882	5	4	2	3	4	3	2	3	2	5	3	4	4	5
19.4338	19.5949	20.5172	19.6156	19.387	19.1955	19.6598	19.7496	19.9654	19.4069	NaN	19.4992	19.0662	18.9787	NaN	21.1067	NaN	21.2981	NaN	NaN	NaN	NaN	NaN	NaN	NaN	NaN	NaN	NaN	NaN	NaN	NaN	NaN	NaN	NaN	NaN	NaN	0	0	1	0	0	0	0	0	0	0	0	0	0	0
NaN	NaN	NaN	NaN	NaN	18.1129	NaN	17.3053	NaN	NaN	NaN	NaN	NaN	NaN	NaN	NaN	NaN	NaN	27.3838	27.6187	27.0409	26.0094	26.7753	27.0715	25.7812	26.2733	26.5201	25.9235	26.0308	25.9851	25.1549	25.2839	26.6078	26.9175	26.3882	26.106	0	0	0	0	0	0	0	0	0	0	0	0	0	0
20.3759	20.8728	20.9036	19.9422	20.3079	19.6418	20.8868	22.38	20.2876	21.593	20.1699	20.3625	20.0969	19.657	19.462	23.5673	20.5518	24.3977	NaN	18.3205	18.4793	19.7789	17.9542	NaN	18.9379	19.3316	NaN	17.7952	17.5511	17.8747	NaN	16.9707	17.8949	18.2713	18.3693	18.7296	0	0	0	0	0	0	0	2	0	1	0	0	0	0
23.3647	23.5558	23.2094	22.9115	22.8974	23.0555	22.8237	23.2811	23.1907	23.4917	23.0659	23.8805	23.7794	23.5779	23.3651	24.0149	23.139	23.9786	19.7201	20.258	19.513	19.8878	20.2043	20.5425	23.0358	22.7616	23.2094	20.0175	20.3445	19.3921	20.0015	20.1933	19.8517	20.9846	20.423	20.6401	3	2	2	3	3	3	1	1	1	1	2	2	3	1
21.8343	23.4828	23.2031	22.997	22.7125	23.3366	22.0122	24.0724	23.3294	23.334	21.967	21.8689	22.4948	21.9371	23.1195	23.7666	23.094	23.97	19.6471	20.1303	19.6412	20.5139	19.976	20.4011	21.2878	23.2248	22.002	19.5483	19.562	NaN	20.3996	19.7263	20.2094	21.1089	20.9205	20.5168	0	3	1	1	1	2	0	2	1	2	0	0	1	0
24.3811	25.3584	24.2926	23.3014	23.3188	24.4498	22.8128	22.8246	22.4572	22.0199	21.758	21.4392	22.0577	22.8655	21.6568	22.0924	21.2261	20.9955	20.1195	19.79	19.8761	21.1854	20.5309	19.6427	18.4826	19.536	19.238	20.2829	20.8958	19.9542	20.9051	20.5481	20.9924	20.3966	20.3147	19.8248	3	4	4	2	1	6	1	1	2	0	0	0	0	1
26.0448	26.2368	25.6592	25.1734	24.8358	24.9275	25.2578	25.2198	24.5677	24.5828	24.2305	23.8616	25.1665	24.3975	24.1335	24.1954	23.9818	24.6364	24.9003	24.8499	25.3525	24.9547	25.246	25.682	24.265	25.2252	23.434	25.5246	25.5451	25.557	25.8194	25.0937	26.4818	24.8223	25.42	25.0886	6	6	3	2	3	3	2	3	1	1	0	0	2	0
18.7574	19.6857	NaN	NaN	NaN	NaN	NaN	19.0356	NaN	NaN	NaN	NaN	19.4556	NaN	19.1231	NaN	NaN	NaN	21.3611	21.5123	20.869	20.9667	21.2732	20.4545	21.7926	20.8762	20.9555	21.7285	21.0407	21.5225	20.3113	20.5579	21.5564	20.5679	20.7503	20.8473	0	0	0	0	0	0	0	0	0	0	0	0	0	0
27.3891	27.2118	26.5171	25.407	25.8902	26.0201	26.5053	24.6163	24.497	26.1886	25.9333	25.7981	26.7804	24.9729	26.5825	24.0696	23.3391	24.0667	26.8647	26.6542	27.0403	23.3853	22.9499	24.4718	18.5976	18.2671	18.2751	21.4027	19.856	21.2538	22.0449	22.1664	22.1491	20.3669	19.4685	20.2493	11	14	10	7	9	7	7	2	5	6	7	4	8	3
23.4501	22.9922	22.3359	21.4975	21.7875	21.056	20.9826	21.7312	21.0032	21.143	21.6892	21.6005	21.4302	21.1014	21.5431	23.0087	22.8803	22.9313	19.0799	19.8185	20.1466	19.5797	19.9267	20.2757	20.9506	21.0692	21.1462	19.2226	19.1523	19.1802	19.6438	19.2438	19.9456	20.5333	19.8688	19.9852	2	1	1	0	1	0	0	1	0	0	1	0	0	1
20.3106	19.9258	20.1341	20.2819	20.2098	19.9945	19.8305	20.5275	21.0818	20.2418	20.4674	19.8291	20.0748	20.331	20.386	20.0387	21.0585	20.6427	NaN	NaN	NaN	NaN	NaN	NaN	21.0827	21.4079	19.9272	NaN	NaN	NaN	NaN	NaN	NaN	NaN	NaN	NaN	0	0	0	0	0	2	0	0	1	0	1	0	0	0
22.6386	22.9812	21.4709	22.174	21.7956	22.0234	21.2732	21.1613	21.9883	21.8513	21.7722	21.1662	21.2263	20.56	21.3754	21.6945	NaN	19.6683	23.7833	22.991	20.9906	22.356	20.8113	21.5992	20.4179	20.4174	20.7404	21.2809	20.7317	22.051	22.0167	22.5404	21.3124	21.3719	20.2629	21.0712	1	1	0	1	0	1	0	0	0	0	0	0	0	0
NaN	NaN	NaN	NaN	17.6604	NaN	18.0252	NaN	NaN	NaN	17.9488	NaN	17.9949	NaN	NaN	NaN	NaN	NaN	18.9369	18.8713	18.7652	19.6258	18.6301	NaN	NaN	NaN	NaN	19.102	19.6754	18.3971	18.6313	18.7542	18.7623	19.484	18.3881	18.4663	0	0	0	0	0	0	0	0	0	0	0	0	0	0
NaN	NaN	NaN	NaN	NaN	NaN	NaN	NaN	NaN	NaN	NaN	NaN	NaN	NaN	NaN	NaN	NaN	NaN	NaN	NaN	NaN	NaN	NaN	NaN	19.8871	19.9634	19.5282	NaN	NaN	NaN	NaN	NaN	NaN	19.6689	NaN	NaN	0	0	0	0	0	0	0	0	0	0	0	0	0	0
28.8689	28.8333	28.6314	28.6838	28.6827	28.6135	29.0169	28.8571	28.6859	28.8712	28.7156	28.6411	28.7958	28.9142	28.8149	29.0008	28.6954	28.936	30.3786	30.2543	29.2348	30.2334	29.5372	29.3965	28.2232	28.3714	28.791	30.0202	29.9234	29.8756	29.6484	30.1187	30.0545	29.3953	29.3896	29.4305	13	14	9	16	14	13	14	11	15	13	12	13	14	12
26.0623	25.8881	25.3523	24.6085	24.3104	24.7489	24.3871	23.912	23.5979	24.4311	23.2947	21.5146	24.0118	23.2393	22.8052	23.1482	22.8614	NaN	21.9204	21.5264	21.6254	22.6581	22.3374	22.2227	NaN	21.3533	21.2631	22.6118	22.5442	22.5178	22.0237	22.4705	22.9437	21.346	21.5116	21.3138	3	3	1	2	1	1	2	3	0	0	1	0	1	0
22.2608	22.0597	22.0488	22.24	22.1845	22.1718	22.0545	22.6487	21.6877	22.0263	21.2568	22.2107	21.8868	21.5765	21.2995	22.4835	22.8308	22.8	19.5812	20.4677	19.5543	20.1518	19.9129	20.6951	22.936	23.0726	23.265	20.1336	19.9054	20.8196	20.7476	20.3516	19.6383	20.0467	21.1989	21.4676	2	2	2	2	2	1	2	1	1	1	0	2	1	0
21.7407	20.7689	20.4807	20.6095	21.9385	21.6835	20.4988	20.8712	20.8235	20.4923	20.0032	20.4565	20.4624	20.1794	20.1635	21.1049	21.2295	21.3359	18.4748	18.933	19.251	19.1247	19.0447	19.5415	20.9698	21.2206	21.1302	18.7832	18.6872	19.2493	18.729	18.4571	18.8229	19.3956	19.3406	19.1616	1	0	0	0	1	1	0	0	0	0	0	0	0	0
20.8029	21.5685	21.1796	21.3835	20.0606	21.4409	21.2891	21.7549	20.7604	21.5543	21.5202	21.5357	21.6497	21.2198	20.8686	NaN	NaN	NaN	21.3775	20.5293	20.5164	20.3296	20.3845	20.3685	NaN	20.0355	NaN	20.4718	20.0196	20.6097	20.163	20.0993	21.1542	19.9113	18.9714	19.4562	0	1	1	1	0	1	2	2	0	1	0	2	1	0
21.901	22.6318	21.6916	21.5918	21.6001	21.5971	21.2074	22.7296	22.1193	21.4198	21.4047	21.1652	21.2248	20.936	20.8102	22.5364	22.6746	21.7837	19.8424	19.6992	20.1747	19.7648	19.8908	19.9212	22.0578	22.8262	21.9045	19.7243	19.8985	19.6257	19.8785	19.9123	19.5016	20.6879	20.7118	20.3956	0	1	0	0	0	0	1	2	1	1	1	0	0	0
20.2646	20.5819	20.8612	20.6521	21.4148	20.2763	20.2749	20.9345	22.3754	19.9769	20.2392	20.8694	20.2823	19.8631	20.3083	22.9458	22.5405	22.8314	19.3397	19.2613	19.8022	19.8732	19.4696	19.2398	22.0345	20.9683	20.4193	19.3678	19.0056	19.5446	19.6501	19.1952	19.243	19.5322	19.4739	19.6764	0	0	0	0	2	0	0	0	1	0	0	0	0	0
NaN	NaN	NaN	NaN	NaN	NaN	NaN	NaN	NaN	NaN	NaN	NaN	NaN	NaN	NaN	NaN	NaN	NaN	NaN	NaN	NaN	NaN	NaN	NaN	20.0475	20.196	20.0935	NaN	NaN	NaN	NaN	NaN	NaN	NaN	NaN	NaN	0	0	0	0	0	0	0	0	0	0	0	0	0	0
28.8549	28.9366	29.823	29.4552	29.6787	29.4622	29.8498	28.9688	29.3055	29.4192	29.1844	29.686	29.3284	28.8436	29.4486	28.4565	28.2988	28.4174	18.8749	16.2113	NaN	21.3771	23.276	18.6998	23.3814	23.9908	20.9974	21.2647	23.021	22.5403	23.2542	22.0213	23.4273	22.4375	22.9049	19.9262	7	10	11	10	12	13	12	12	11	12	15	15	11	11
NaN	NaN	NaN	NaN	NaN	NaN	NaN	NaN	NaN	NaN	NaN	NaN	NaN	NaN	NaN	NaN	NaN	NaN	19.3729	19.2161	20.7178	19.5893	19.1347	21.8298	NaN	NaN	NaN	19.5356	19.2684	19.2254	19.1362	18.8102	19.8551	18.7556	18.6365	19.1952	0	0	0	0	0	0	0	0	0	0	0	0	0	0
21.3584	21.6326	21.8137	21.523	21.5428	21.4221	20.8213	20.7234	20.9486	21.4196	21.1096	21.2667	20.6835	21.4384	21.4864	22.2063	21.9373	21.8825	22.1322	21.1986	20.4734	21.3844	21.1382	19.8326	22.8761	22.8534	22.7763	20.5674	20.5315	20.2794	20.5648	21.0217	20.2545	22.0878	21.7549	21.7777	0	1	2	1	1	2	0	0	0	0	0	0	0	0
24.8712	25.1058	24.502	24.8569	24.6861	25.3243	25.0506	24.9595	24.7087	24.4181	24.7927	24.9126	24.4253	24.6415	25.0173	24.8098	25.0784	24.9726	24.2798	24.5872	24.5583	24.5995	24.5715	25.5853	25.115	25.2858	25.3142	24.2465	24.2491	24.1615	24.0313	24.1687	24.2404	24.7697	24.8602	24.8503	4	3	0	1	2	2	2	1	2	0	2	0	0	2
23.7166	23.2724	23.4113	22.7359	22.8374	22.8835	23.1005	22.7997	22.6318	23.2548	22.9911	23.195	22.8935	22.9192	23.5008	22.9721	23.6055	24.0241	21.7232	22.8085	22.1181	21.9128	22.0252	22.7349	23.4087	22.5469	23.6309	21.0751	21.529	21.9603	21.6176	21.0446	21.4097	21.7237	21.679	21.7194	3	1	2	0	1	1	0	1	0	1	0	0	0	1
14.3967	16.1343	17.2162	17.2956	NaN	16.0503	NaN	NaN	NaN	16.2328	15.349	16.5377	NaN	15.5365	17.1955	15.1057	15.1984	15.2128	30.7188	31.9585	28.4805	29.7306	28.3553	29.5738	30.0321	30.3897	29.7838	32.0703	30.3651	30.738	30.417	29.774	30.0128	31.4929	31.1381	29.4741	0	0	0	0	0	0	0	0	0	0	0	0	0	0
19.434	18.9627	18.9392	18.1372	18.57	19.4445	18.3778	19.0001	19.0312	19.2716	18.4369	18.4887	18.8535	18.2676	18.1521	19.6012	19.7013	21.9927	25.8401	25.9456	25.7356	26.461	26.3401	27.1409	27.247	26.6726	27.5652	24.4972	26.0368	25.5359	23.7545	25.6439	25.5636	26.3625	26.6062	27.1873	0	0	0	0	0	0	0	0	0	0	0	0	0	0
21.8529	20.9741	21.1468	21.1558	21.1645	21.0825	21.5632	21.9734	21.6395	21.9389	21.5158	21.5618	21.7594	21.0883	21.3913	22.0193	21.7814	23.8262	24.5246	24.5301	22.499	24.5453	22.7154	24.483	24.241	24.183	24.7377	23.1435	23.0371	22.5513	22.5066	23.5713	22.1081	24.8796	24.7141	25.0488	0	0	0	0	0	0	0	0	0	0	0	0	0	0
22.0329	21.7103	21.1101	20.9021	21.5358	21.1644	21.4169	21.4374	20.498	21.6369	22.0518	21.3751	21.7791	20.4339	21.2061	21.749	21.667	21.6506	19.2535	19.1377	19.0792	19.5672	18.8814	19.2714	21.7117	21.3502	21.0349	19.0497	19.285	18.9143	19.2436	19.1407	19.0552	19.0467	20.1903	20.2931	2	2	0	0	1	1	1	1	0	1	1	0	2	0
20.7375	21.6331	20.6781	20.0646	19.236	20.0273	20.5677	20.6373	20.3147	21.0449	21.2445	19.3643	20.1262	20.1674	20.5486	NaN	NaN	NaN	19.3619	18.9577	19.3614	19.3237	19.3141	23.1353	NaN	19.0494	19.6813	19.0156	19.8399	18.7999	20.108	18.735	18.709	19.9076	NaN	19.9915	0	1	0	0	0	0	0	0	0	1	1	0	0	0
20.362	NaN	NaN	20.6292	20.2969	20.3002	21.8135	22.3048	21.5543	20.7693	NaN	NaN	20.345	NaN	NaN	21.9801	23.2414	23.7605	NaN	NaN	NaN	NaN	NaN	NaN	NaN	NaN	NaN	NaN	NaN	NaN	NaN	NaN	NaN	NaN	NaN	NaN	0	0	0	0	0	0	1	2	0	0	0	0	0	0
23.258	23.335	23.3889	23.4791	23.5856	23.6557	22.9331	22.8835	22.3753	23.5346	23.259	23.6329	23.1786	23.7024	23.847	24.4403	24.4017	24.072	20.5926	21.013	21.6406	21.3245	21.247	22.4953	24.4177	24.2485	23.7777	21.0374	20.9484	20.4639	21.0019	20.6348	20.9788	21.2794	21.783	21.4638	3	2	3	2	3	3	2	2	1	2	1	2	2	2
23.86	23.9445	24.2814	23.5624	24.0311	23.5005	23.7708	24.1762	23.897	23.8959	24.0111	23.5431	23.5443	23.8585	24.332	24.2024	24.2261	24.141	22.4383	22.7972	21.9137	23.2597	22.9598	23.4644	23.5557	23.8213	24.6719	22.2725	22.2837	23.1483	22.0453	22.1033	21.7064	23.5781	22.8292	23.1163	2	1	1	1	1	1	1	2	1	1	1	1	2	1
20.9518	22.2082	22.1694	20.7828	20.431	20.9864	22.9709	23.068	22.9505	22.6392	22.4271	21.3791	22.0435	23.5724	20.8021	21.7424	21.7492	22.7047	18.9137	18.7814	NaN	20.3989	18.996	18.8129	NaN	20.8796	20.8645	20.9701	18.8828	18.6396	18.6187	18.4551	NaN	19.3054	19.1776	19.5388	0	1	1	0	0	0	2	1	1	1	1	0	1	1
21.7157	20.9387	21.7462	22.6425	22.3382	22.4061	21.9176	22.6005	22.0231	22.5656	22.9916	22.3752	21.8856	22.8879	22.2988	22.8605	22.5147	22.9805	24.7978	25.1155	23.4449	24.6758	24.6727	24.1648	25.5872	24.6792	25.5836	23.6738	24.1856	23.8894	23.8376	23.964	23.6056	24.8537	24.4493	24.7293	1	0	0	0	0	1	0	0	0	2	1	0	0	1
24.049	24.5101	23.2378	22.5668	22.2142	22.763	22.955	23.317	21.9596	22.928	23.2618	22.874	23.1436	22.1273	22.3667	22.7842	22.8237	23.3372	24.3554	23.9649	24.1615	23.6864	23.9801	24.5068	21.9034	22.4519	23.4438	23.6168	24.192	24.5139	24.5652	23.9365	24.321	23.6333	23.6449	24.2107	4	4	0	0	0	0	0	1	0	1	2	1	2	0
NaN	NaN	NaN	NaN	NaN	19.2993	NaN	NaN	NaN	NaN	NaN	17.7764	NaN	NaN	NaN	19.0903	NaN	19.1226	NaN	NaN	NaN	NaN	NaN	NaN	19.2783	19.4819	21.4366	NaN	NaN	NaN	NaN	NaN	NaN	NaN	NaN	19.7469	0	0	0	0	0	0	0	0	0	0	0	0	0	0
30.1273	30.3466	30.3334	30.1507	30.2592	30.3103	30.7267	30.0778	30.0062	30.2903	30.1685	29.951	30.8536	30.1905	30.1036	29.1783	28.8817	28.5994	28.6438	28.4763	29.4456	29.1269	29.2524	29.5554	27.3161	27.5483	27.09	29.5177	29.1859	29.4201	29.1517	28.8868	29.5989	28.532	28.5562	28.32	48	47	41	43	52	56	53	48	50	39	41	41	54	38
21.6224	21.8365	21.5397	22.2618	22.0389	22.0725	20.5546	22.6671	22.0236	23.2815	23.0764	21.2189	22.0441	22.3042	20.5006	21.5721	21.1053	21.2887	23.6255	22.7526	24.907	24.2112	24.6584	24.8565	25.9536	25.9254	25.4112	24.4118	24.4401	24.6351	24.5982	24.3426	24.2476	24.9211	25.0488	24.9137	0	0	0	0	0	0	0	0	0	1	1	0	0	0
22.1285	22.0541	21.3301	21.532	21.6279	21.1184	20.3176	20.2687	21.3551	20.8109	21.636	21.2491	20.8829	21.4465	19.2613	21.3803	21.9092	21.0684	20.1398	19.5045	19.7223	19.8294	19.2343	19.6442	22.4343	22.7991	22.3424	20.33	20.3025	19.3785	20.308	19.6142	20.0201	21.5401	19.7022	21.0684	1	1	1	1	1	0	0	1	2	0	0	1	0	1
23.0215	23.2074	23.6064	23.5884	23.8893	22.8746	23.7547	23.3279	23.0692	23.4796	23.2736	23.5781	22.9734	23.1001	23.3577	23.5645	24.0953	22.8809	22.0179	22.312	23.1093	23.322	22.4384	23.3691	22.1722	22.6723	22.1779	22.8614	23.1464	22.668	22.7058	22.7256	24.1765	22.8984	22.3387	22.0129	1	1	1	4	3	2	1	2	2	1	1	1	1	0
28.455	28.5694	28.5393	29.6569	29.6354	29.1291	25.4136	25.9821	26.9649	29.2889	28.0583	28.2044	29.4688	29.2126	27.9388	26.8694	26.9197	26.3636	24.6494	25.1913	24.935	25.3462	26.0785	24.6466	26.6476	26.8571	25.8803	24.8886	25.435	25.6889	25.2783	25.0082	25.8611	25.341	26.1257	25.8114	6	7	5	8	11	6	4	4	4	9	8	7	6	12
22.8334	23.157	22.983	28.499	28.5004	28.4326	23.169	23.0103	23.2254	23.0722	23.784	22.8227	22.3454	22.2727	22.9849	22.6601	21.6564	21.795	22.2313	23.0093	24.2813	27.4403	28.1248	28.511	23.1614	24.1683	24.7527	22.7509	23.6011	23.316	24.1066	23.0066	22.97	23.8861	24.7053	24.1658	0	0	0	8	9	11	0	0	0	0	1	0	0	0
24.0906	23.933	23.5458	23.1755	23.7025	23.332	23.1803	22.9308	23.5705	23.3115	23.4162	23.3498	23.7737	23.193	24.3573	23.4453	23.2056	23.2445	22.2314	23.8042	22.1284	22.6438	22.193	23.2971	23.4079	23.6024	23.8916	22.0049	21.6599	22.4756	22.1746	22.0275	22.3199	22.4714	22.3548	22.7695	1	1	1	1	1	0	0	0	1	0	1	2	1	0
20.4328	20.7384	20.4591	20.5968	21.6487	21.226	20.8874	20.8314	20.8919	20.7167	20.6509	20.6659	20.7422	20.7416	20.7115	20.8322	20.216	20.1459	22.3907	21.662	21.6586	22.4411	22.0951	21.6343	21.0931	21.2145	22.2139	23.1123	22.9402	22.8714	22.4753	22.8424	22.9133	21.3238	21.7675	21.8882	0	1	0	0	0	1	0	0	0	0	1	0	0	0
19.7264	19.5643	19.9411	25.2924	24.9869	25.3377	19.7908	19.8199	20.3723	20.6604	19.6566	19.7859	19.7167	20.9492	20.5832	NaN	19.4289	NaN	19.2057	19.8932	20.2362	25.0004	27.3084	26.7041	NaN	NaN	NaN	19.6964	20.4676	19.1672	19.9801	20.0954	19.459	20.4277	20.3194	20.3591	0	0	0	2	1	2	0	0	0	0	0	0	0	0
20.9627	21.7543	22.6887	21.6425	20.5945	21.6099	20.5717	20.3322	22.3236	20.306	21.5934	21.0002	20.2558	20.9053	22.6509	20.7005	NaN	NaN	18.749	19.518	19.8844	20.5165	19.5494	21.0433	20.2299	NaN	NaN	19.3418	19.5528	19.8143	20.3981	19.3854	20.1799	19.6357	20.4982	20.5542	0	1	1	1	0	1	0	0	2	0	1	0	0	0
22.7913	22.0203	21.5148	21.0352	21.1659	21.6216	21.4175	21.4974	20.7133	20.8224	21.1787	21.4312	21.1856	20.7215	21.428	22.143	21.813	21.9377	NaN	NaN	NaN	NaN	NaN	20.0761	21.1521	21.1096	20.9999	NaN	NaN	NaN	NaN	20.0812	NaN	NaN	20.416	20.7292	1	2	0	1	1	0	1	1	0	0	0	1	1	0
22.4818	22.5803	22.4311	22.4125	22.3723	22.2947	22.2978	22.192	21.4583	22.8506	22.5689	23.0621	23.3427	23.2893	22.9832	22.9282	23.2126	21.5711	19.9498	19.8951	19.379	19.4448	19.97	19.6137	20.3879	19.8902	20.1202	19.1455	19.538	18.6361	19.6086	19.7648	19.4089	20.377	20.3195	20.6042	2	3	2	2	1	3	1	2	0	3	2	2	2	1
20.6978	20.6887	20.224	19.7261	19.9128	19.876	20.4398	19.9991	19.799	20.2724	20.5013	20.5323	20.2101	19.9128	20.0502	20.5358	20.8874	20.9652	19.6823	19.3121	19.7897	19.5971	19.6613	21.5498	21.2012	20.6159	22.2268	19.3157	19.6137	19.5109	20.0006	20.0624	19.4124	19.5877	19.9555	20.0511	1	1	0	0	0	0	0	0	0	0	0	0	0	0
23.3744	23.1785	21.4567	23.1238	21.3473	22.8904	21.6825	22.3404	22.3258	21.1472	22.9148	22.5348	22.8942	23.1936	22.1174	22.687	23.5358	24.0056	20.4885	20.6334	20.8422	20.6343	20.4259	20.4764	22.2174	23.0919	24.0898	20.7744	20.4895	20.8833	21.0053	21.0254	20.7049	21.1454	20.8599	21.3145	1	2	0	1	0	1	1	0	0	0	1	0	2	1
26.7049	28.0884	28.4412	27.2852	27.4284	27.5588	27.4181	28.1311	27.6057	27.3859	27.9852	27.6792	27.0495	26.8304	25.3615	26.3268	26.047	26.5224	17.8535	17.17	17.4615	19.1958	17.4184	17.5248	16.5002	17.2723	17.1156	19.0171	18.1372	17.1869	17.425	17.3291	17.4132	15.9397	20.2382	17.9379	14	19	22	17	16	17	16	17	11	16	18	17	16	9
20.3661	20.9499	21.5192	19.1586	19.5722	19.7289	19.5558	NaN	20.2534	20.1807	22.0309	19.8041	20.2754	19.9389	20.1027	19.4656	19.5869	19.6498	19.5791	18.9549	19.6083	19.1303	19.2672	18.9915	NaN	19.4292	NaN	19.3289	19.2352	19.9991	19.4134	19.842	19.3042	19.4047	21.498	19.9038	0	0	1	0	0	0	1	0	1	0	1	0	0	0
24.621	24.6761	24.2825	23.8614	23.1427	23.9168	24.3028	24.51	23.5013	24.1263	23.6068	22.1645	23.4276	23.6038	22.4985	22.3697	21.6677	21.6934	22.3567	22.357	22.2477	22.7447	23.008	21.9486	20.6937	21.3189	21.5427	22.7399	22.5294	22.6809	21.608	22.028	21.8693	21.0618	20.7759	21.6381	3	3	2	3	1	1	2	3	2	3	2	0	2	2
24.5884	24.489	24.1775	23.1562	24.2688	23.8393	24.2995	25.3505	24.2209	23.0753	23.6752	23.3585	23.7442	22.9251	23.6429	25.1531	25.4331	25.2486	20.771	21.5192	20.998	21.4921	21.4587	21.1788	23.8164	23.3221	23.7273	20.434	21.5209	20.5366	20.6071	21.6023	21.4061	21.7432	21.94	20.8269	4	3	3	0	1	2	1	3	2	0	2	1	1	0
17.5684	NaN	NaN	NaN	NaN	NaN	NaN	17.8165	NaN	NaN	NaN	NaN	NaN	NaN	17.9151	20.69	20.9576	21.3642	NaN	NaN	NaN	NaN	NaN	NaN	16.8269	NaN	NaN	17.7493	NaN	NaN	NaN	NaN	NaN	NaN	17.5878	17.2339	0	0	0	0	0	0	0	0	0	0	0	0	0	0
17.1235	17.3895	17.1241	18.8669	17.8727	17.4784	16.6101	16.4907	17.1106	17.5296	17.5168	17.3056	17.3905	17.6206	17.1788	17.5403	17.7046	17.0236	NaN	NaN	NaN	NaN	NaN	NaN	NaN	NaN	NaN	NaN	16.8504	NaN	NaN	NaN	NaN	NaN	17.4663	17.0815	0	0	0	1	0	0	0	0	0	0	0	0	0	0
23.7208	24.0296	23.7676	23.4849	23.4118	23.3791	22.8029	22.5979	22.9484	24.1427	24.4377	24.3173	22.9397	23.8813	23.6127	24.0052	23.8336	24.0068	25.5408	25.4558	25.7502	25.4231	25.4415	25.9904	25.77	26.1832	26.1685	28.2119	28.0754	28.2159	24.9827	24.972	24.9655	25.9211	25.5963	25.85	2	2	1	1	3	4	1	0	2	3	2	2	0	0
21.3036	21.2969	21.373	20.9404	20.9359	21.2474	21.3877	20.8299	20.4053	21.0983	20.3433	19.9506	20.7956	20.3419	20.8569	20.4754	19.8614	20.0329	18.7899	18.0688	18.1252	18.4899	18.4667	18.9465	NaN	NaN	19.4005	18.1838	18.3152	18.3412	17.5675	18.0569	17.9976	18.1741	17.8213	18.1671	1	1	1	2	1	1	1	1	1	1	1	0	1	1
26.9979	26.9806	27.1319	26.421	26.6867	26.7903	26.833	26.522	26.4405	27.1049	27.1568	26.8851	27.3316	27.185	26.8429	25.5871	25.505	24.9312	26.1902	25.9631	26.7771	26.5182	26.7083	27.5577	24.5976	25.0283	24.4585	26.8277	26.3527	26.8398	26.0763	25.5121	26.6075	25.5996	25.7452	25.7535	15	12	8	6	10	13	11	9	12	16	12	13	18	9
19.9088	20.0742	NaN	NaN	NaN	19.0886	NaN	NaN	NaN	NaN	NaN	NaN	NaN	NaN	NaN	19.3709	20.5935	20.3687	NaN	23.7599	19.6099	21.4513	21.6388	NaN	23.6439	23.108	24.7939	21.2636	NaN	21.2129	21.4362	NaN	21.6116	21.1722	19.6757	19.5521	0	0	0	0	0	0	0	0	0	0	0	0	0	0
NaN	NaN	NaN	NaN	NaN	NaN	NaN	NaN	NaN	NaN	NaN	NaN	NaN	NaN	NaN	NaN	NaN	NaN	19.2495	18.4021	19.5322	19.4026	18.9239	21.7735	20.7827	19.716	19.7627	19.2078	19.222	18.5574	NaN	18.9977	19.4084	19.3082	19.0407	19.1314	0	0	0	0	0	0	0	0	0	0	0	0	0	0
22.6283	23.0372	22.5101	21.0125	21.0055	21.6839	22.6231	21.3695	21.2428	21.8336	22.0553	21.6482	23.0006	21.7596	21.7871	20.3263	NaN	20.9924	21.214	20.5619	22.4862	20.9821	21.0948	22.398	NaN	NaN	NaN	21.0385	20.6952	20.9229	20.8264	20.8334	22.5108	20.4608	20.4206	20.5358	3	4	1	1	0	1	2	1	1	0	0	2	2	0
26.1829	25.8868	25.338	26.6079	26.1312	26.3966	25.8073	25.8035	26.4627	25.9901	26.2683	26.5714	26.4642	26.9877	26.9197	26.7759	26.2847	26.509	24.0723	24.7217	25.085	25.0678	24.6734	24.6388	24.8764	25.2233	24.1975	24.4752	24.062	24.1488	23.9938	24.5374	23.8512	25.6277	25.1498	25.6417	4	1	0	4	2	1	1	1	3	1	2	5	2	5
22.0537	22.5869	23.0306	22.6255	22.4937	22.29	22.931	23.5342	21.7449	22.2016	21.7585	22.2502	21.7849	22.0436	21.8716	23.0508	22.0297	21.3594	20.4658	20.6601	20.8592	20.756	21.1736	20.9803	NaN	NaN	20.2756	21.2845	20.8287	21.6421	21.3994	21.3415	21.671	21.153	20.9713	20.3042	1	2	0	1	0	1	2	2	0	0	1	1	0	1
26.8565	26.8925	26.6369	25.8536	26.1218	26.2193	26.1335	26.2602	26.2262	26.7665	26.5636	26.1604	26.911	26.2623	26.9768	27.8696	26.5361	26.7512	28.5682	28.0108	27.3829	28.416	27.4798	28.1952	26.7104	26.8373	27.6682	28.2911	28.3266	27.7717	28.0283	28.4346	28.2799	28.1822	27.6152	27.614	3	3	2	1	1	1	3	4	1	2	2	2	2	1
22.9363	22.6474	22.3373	21.9293	22.0101	21.9909	21.6914	21.1867	21.1031	21.9523	22.2573	21.8741	21.3817	21.6723	21.207	21.8746	22.7746	22.7984	21.4686	21.0961	21.4444	21.8203	21.5801	22.0393	22.7593	22.9819	23.0522	21.1696	21.2785	21.4283	21.5617	21.6494	20.3818	21.9843	22.2306	22.5544	0	2	2	1	1	1	0	1	0	1	0	1	0	0
27.3241	26.6837	25.9472	25.9899	26.2746	26.2611	27.7296	26.4721	26.6079	26.9562	27.342	27.252	27.971	26.8162	27.4168	25.6274	25.6289	25.7128	28.5048	28.9148	29.4202	28.2658	28.4269	28.5791	26.6071	26.6177	26.6468	29.0107	29.0764	29.0795	28.3695	28.3015	30.2467	27.7924	28.2465	28.1422	3	3	2	3	1	2	2	3	2	2	2	3	6	3
24.0733	24.4266	24.2229	22.9895	22.8411	23.8048	22.8722	22.3881	20.7099	22.8861	22.3887	20.5931	22.9181	21.2069	20.7115	19.6992	20.7972	19.4153	20.5877	20.471	20.4294	22.1761	20.5858	19.4244	18.1318	18.4068	17.8413	20.7066	20.9839	20.4654	20.0413	20.4449	21.1291	20.3822	19.9505	19.9637	5	6	7	2	1	3	2	1	0	1	1	0	1	0
NaN	NaN	NaN	NaN	NaN	NaN	NaN	NaN	NaN	NaN	NaN	NaN	NaN	NaN	NaN	NaN	NaN	NaN	NaN	NaN	NaN	NaN	NaN	NaN	20.5506	20.6195	19.904	NaN	NaN	NaN	NaN	NaN	NaN	NaN	NaN	NaN	0	0	0	0	0	0	0	0	0	0	0	0	0	0
NaN	NaN	NaN	NaN	NaN	NaN	NaN	17.9028	NaN	NaN	NaN	NaN	NaN	NaN	NaN	18.3835	18.826	19.9933	NaN	NaN	NaN	NaN	NaN	NaN	17.6425	NaN	NaN	NaN	NaN	NaN	NaN	NaN	NaN	NaN	NaN	NaN	0	0	0	0	0	0	0	0	0	0	0	0	0	0
21.7246	22.2327	21.8574	22.067	21.8689	22.3449	21.4303	21.1605	21.7794	21.4115	21.9578	21.9084	21.2013	21.3542	21.7638	22.4581	21.8372	22.5957	19.6104	21.2753	20.2884	21.5173	20.9493	20.7607	21.6892	22.2639	21.964	20.0695	20.0577	21.1155	20.3015	20.2349	20.1223	21.2597	20.8007	20.9627	0	2	0	0	0	1	0	0	0	0	1	0	0	0
18.7634	18.5529	NaN	NaN	NaN	NaN	NaN	18.8059	NaN	NaN	NaN	NaN	18.2766	18.5983	NaN	20.4642	19.9501	21.526	18.8649	19.0922	NaN	19.0577	19.206	NaN	20.202	20.1623	20.4038	18.9359	NaN	19.134	NaN	NaN	NaN	NaN	NaN	NaN	0	0	0	0	0	0	0	0	0	0	0	0	0	0
18.33	NaN	NaN	NaN	NaN	NaN	NaN	NaN	NaN	NaN	17.9879	NaN	NaN	NaN	NaN	NaN	NaN	NaN	19.2443	19.1441	19.4442	19.6063	19.0865	NaN	NaN	NaN	NaN	18.9272	18.7292	20.5348	18.6964	17.4767	19.6751	NaN	17.2271	NaN	0	0	0	0	0	0	0	0	0	0	0	0	0	0
27.0672	26.9466	25.7477	24.7481	24.4629	25.039	25.7817	24.4216	22.8699	25.1801	25.1279	25.5154	25.4294	24.498	25.7598	24.1472	23.4405	24.0919	26.1055	26.1809	26.0811	21.7083	21.6203	24.1929	21.2943	21.0783	21.4538	21.1449	20.1163	20.6411	21.5747	21.9771	21.8513	18.6329	18.5131	18.9944	18	14	8	5	4	5	6	5	0	8	5	5	8	3
22.3794	22.2097	22.1837	21.9012	22.1568	22.0672	22.1574	21.7233	22.743	22.2785	22.3278	22.3368	22.7599	21.8964	23.1452	22.1233	NaN	22.7317	23.2103	23.6224	22.5451	23.2258	23.1304	24.3932	24.5136	24.7089	25.1247	22.5485	23.0343	22.6783	23.0217	23.6734	22.6435	23.3373	23.5775	24.0205	0	0	0	0	0	0	0	0	0	0	1	0	0	0
23.0192	22.5628	20.8349	21.3603	22.7386	22.7799	NaN	NaN	NaN	18.5287	18.8887	18.7353	21.708	20.7652	18.1283	17.6423	17.006	17.5098	23.3612	22.7764	23.4692	23.7418	24.0444	22.3089	22.7024	22.9041	22.422	22.9621	22.5636	23.6473	23.6951	24.1422	23.0143	24.0236	24.0026	23.6994	1	1	0	1	1	1	0	0	0	0	0	0	1	2
19.9157	19.5894	20.005	NaN	19.2879	19.2201	19.0803	20.0276	19.7515	NaN	19.4717	19.7041	19.6755	19.7093	19.8273	19.9492	20.19	21.7913	NaN	NaN	NaN	NaN	NaN	NaN	19.7707	19.8217	19.7749	19.0579	NaN	NaN	NaN	NaN	NaN	19.5884	NaN	NaN	0	0	0	0	0	0	0	0	0	0	0	0	0	0
NaN	NaN	NaN	NaN	NaN	NaN	NaN	NaN	NaN	NaN	NaN	NaN	NaN	NaN	NaN	NaN	20.2346	NaN	NaN	NaN	NaN	NaN	NaN	NaN	19.7855	20.8062	20.5035	NaN	NaN	NaN	NaN	NaN	NaN	NaN	NaN	NaN	0	0	0	0	0	0	0	0	0	0	0	0	0	0
25.893	26.1798	26.044	26.0162	25.6255	25.7629	26.1939	25.9495	26.2421	27.7703	27.7804	27.8667	25.9878	26.3468	26.2933	25.7854	25.7006	25.531	30.0587	29.6362	28.941	29.1916	28.6297	28.2434	27.8313	27.9955	27.9878	29.3986	29.0848	29.0431	28.341	28.6678	28.592	28.4757	28.1296	28.2628	6	10	3	8	4	6	5	2	8	23	20	19	7	6
26.814	26.9559	26.8821	26.1255	27.0717	26.3433	27.811	26.8391	26.6362	26.3471	26.6691	26.1368	26.2841	26.1887	25.6198	25.7116	26.6248	25.9736	18.2919	19.432	21.3064	20.9046	19.1609	19.1804	17.8597	19.0687	18.9346	19.1349	18.5563	19.1526	NaN	19.5541	19.3554	22.1783	16.5931	22.5485	10	11	11	7	18	10	14	12	11	12	12	13	12	10
29.691	29.8034	29.6281	29.3658	29.3492	29.7644	29.9334	29.6969	29.3532	29.8717	29.3509	29.4796	29.6518	29.3902	29.8433	29.4025	28.7963	29.1431	31.3669	30.972	30.2016	31.292	30.5888	30.6723	28.9907	29.2415	29.6558	30.8861	30.9867	30.7995	30.2488	30.821	30.7218	30.2577	29.9292	30.3285	8	8	7	7	6	7	7	8	7	11	7	7	9	7
NaN	NaN	NaN	NaN	NaN	NaN	NaN	NaN	NaN	NaN	NaN	NaN	NaN	NaN	NaN	NaN	NaN	NaN	NaN	NaN	NaN	NaN	NaN	NaN	19.6062	20.023	19.2294	NaN	NaN	NaN	NaN	NaN	NaN	NaN	NaN	NaN	0	0	0	0	0	0	0	0	0	0	0	0	0	0
NaN	18.5352	18.1746	19.2029	NaN	NaN	19.4584	18.1959	NaN	NaN	NaN	NaN	NaN	NaN	NaN	19.0855	19.2158	20.3014	18.9713	18.7203	19.4886	19.1486	19.0904	18.9926	19.721	21.3983	19.2062	18.6803	19.0389	19.3587	18.4202	19.1141	19.0305	18.2215	18.3484	18.1264	0	0	0	1	0	0	1	0	0	0	0	0	0	0
18.5083	19.4011	19.6447	19.0213	18.8341	18.8595	18.8317	18.4132	18.5901	19.2818	19.5073	18.8131	NaN	19.0846	19.0575	18.9946	18.44	18.7099	21.5777	21.2323	19.5721	20.9964	20.0121	19.6331	19.9346	20.0033	20.1954	19.9164	19.9929	19.7103	19.7759	19.76	19.7266	19.73	19.6347	19.3761	0	0	0	0	0	0	0	0	0	0	0	0	0	0
22.1566	22.3714	22.4277	22.8948	22.1176	22.1057	22.54	23.1569	22.8405	22.1363	21.642	21.543	21.5873	21.8944	22.1639	22.523	23.0176	22.9342	22.8443	24.0381	23.9535	24.1268	24.2496	21.6114	25.5743	25.5025	26.3625	24.098	23.9222	23.7196	23.1337	23.6087	22.5014	23.9868	24.7062	24.8258	0	0	0	1	0	0	0	1	0	0	0	0	0	0
23.9608	23.7708	23.9108	22.9877	23.4764	22.7657	22.8494	21.6353	22.0528	22.3966	22.239	22.9477	21.9259	22.2432	22.4181	21.8707	21.8894	21.9001	22.0771	22.7102	23.4827	22.2981	22.9401	22.7503	24.0056	24.1557	23.6928	22.5747	22.9773	22.9971	23.1783	22.6217	23.3971	22.896	23.2261	23.1449	2	2	1	0	0	1	1	0	0	0	0	1	0	2
NaN	NaN	NaN	19.7563	NaN	20.0059	NaN	NaN	19.6071	NaN	NaN	NaN	NaN	NaN	19.6074	NaN	19.4916	NaN	20.4585	20.8735	20.3691	20.9436	20.4524	19.502	19.4554	NaN	NaN	21.2306	20.7293	21.3023	20.9026	21.2259	21.1492	20.6874	21.0222	20.7374	0	0	0	0	0	0	0	0	0	0	0	0	0	0
28.7405	28.6842	28.4599	28.5846	28.6447	28.7267	29.0137	29.0006	28.8494	28.9054	29.0734	28.7799	28.8154	28.8432	29.0983	29.0047	28.7289	28.9764	30.6652	30.4305	29.5433	30.5296	29.7037	29.9427	28.8577	28.7178	29.273	30.1218	30.2538	30.0423	29.7837	30.2278	30.361	29.7229	29.3789	29.5923	10	8	7	9	8	11	9	11	9	11	11	10	9	10
21.7544	21.418	21.5154	22.3048	22.2837	23.5013	21.7439	20.747	21.2778	22.0942	21.6862	24.0102	21.9804	20.4242	22.38	21.2316	21.4238	21.7416	NaN	NaN	NaN	18.9989	NaN	NaN	NaN	NaN	NaN	NaN	NaN	NaN	NaN	NaN	NaN	NaN	NaN	NaN	1	0	0	2	2	1	0	0	0	1	1	4	1	0
21.2597	19.4388	19.3404	19.354	19.2139	19.3272	19.2943	20.1824	19.3392	19.3596	19.7092	19.4168	19.8357	19.4532	19.589	22.34	20.6307	22.9468	19.6139	20.1519	18.6158	20.4059	20.0951	18.8701	20.8237	19.83	20.7616	19.8179	19.5846	19.8922	19.5675	19.845	19.4196	20.2398	18.6079	19.2892	1	0	0	0	0	0	0	0	0	0	0	0	0	0
NaN	NaN	NaN	23.1991	23.4189	23.0712	24.0534	23.4504	24.8069	24.8286	24.5347	24.5431	24.4268	23.5701	23.4085	22.92	23.7201	23.8686	NaN	NaN	NaN	18.7923	NaN	NaN	NaN	19.7226	NaN	20.0714	NaN	NaN	NaN	NaN	NaN	NaN	NaN	NaN	0	0	0	1	1	0	1	1	2	2	1	2	1	0
20.2031	NaN	19.266	19.0782	20.0875	20.383	20.8597	19.5812	18.9922	19.7006	19.707	19.0176	20.7769	19.4848	20.2299	18.0463	17.8074	18.4204	24.9745	24.1578	25.7594	24.1596	24.3789	25.1774	22.0589	22.3257	22.0381	24.0046	23.8534	24.2034	22.6125	22.8519	23.7932	23.3902	22.2858	21.9841	0	0	0	0	0	0	0	0	0	0	0	0	0	0
21.7837	22.2217	21.5998	22.402	21.9786	22.2644	21.879	22.4665	21.5499	21.8161	21.5531	22.1538	21.5563	21.5996	21.5761	20.9528	21.9969	20.4078	23.2005	23.9719	23.2734	23.35	23.0144	22.0234	21.5671	21.8641	22.214	23.5095	23.734	23.6318	23.1851	22.8353	23.4794	22.3073	22.7101	21.9578	1	1	0	1	0	1	0	1	0	0	0	1	0	0
22.7971	23.0475	22.5564	23.3475	22.9664	23.1014	22.7679	23.2785	23.1602	23.7158	23.3784	22.9446	23.2347	23.5594	22.851	23.2754	22.5737	22.3526	24.4063	24.9027	25.0957	24.5533	24.4818	25.1288	25.4172	25.7877	25.8948	24.5716	25.118	24.6646	24.3923	24.5689	24.4319	24.4217	24.395	24.3273	2	2	1	1	2	2	1	2	2	1	1	0	1	1
20.3373	20.412	20.9163	21.0971	21.5924	21.0854	20.3346	20.1807	21.9234	23.1949	21.7539	21.7237	20.4609	21.5159	20.1168	20.6366	20.5337	20.2761	NaN	NaN	NaN	NaN	NaN	NaN	NaN	NaN	NaN	NaN	NaN	NaN	NaN	NaN	NaN	NaN	NaN	NaN	0	0	0	0	1	1	0	0	0	2	0	0	1	1
26.0648	26.3863	26.7626	26.7209	26.582	26.6499	26.5669	26.3265	26.9149	26.6084	26.8065	26.7197	26.3574	26.8713	26.7569	25.819	25.6935	25.5505	24.4745	23.9397	24.6013	24.7705	25.6173	24.4645	24.0561	24.2085	23.6884	24.2255	25.0693	25.3404	25.122	24.0979	24.9242	24.1925	24.7687	24.4874	4	5	7	5	7	7	3	4	5	5	6	6	7	8
23.0494	23.0758	24.7868	25.4629	24.5455	24.3741	24.0278	23.8147	24.9001	24.2821	23.6236	24.0239	24.2161	24.0868	23.5434	23.3387	23.4984	23.0536	NaN	21.261	NaN	NaN	NaN	NaN	NaN	NaN	NaN	NaN	NaN	NaN	NaN	NaN	NaN	23.8929	23.3975	23.3087	0	0	1	1	1	0	0	0	1	0	0	0	1	0
22.5904	22.4008	22.6374	22.4261	22.1029	22.2462	22.278	22.201	22.2403	22.6068	22.2135	22.7434	22.8215	22.8075	22.5396	22.763	22.1851	22.6487	22.8729	21.7194	22.5617	22.2547	22.4289	21.7387	22.4851	23.3809	22.9146	21.9397	21.9083	22.0875	22.1652	22.1874	21.8441	21.8372	21.3579	21.4567	1	1	0	1	0	0	0	0	0	0	1	0	1	0
19.6116	19.4571	19.7494	19.7501	19.4417	19.8997	19.5262	19.2821	19.477	19.5114	19.5623	19.8593	19.0644	19.8104	NaN	19.8524	21.4794	20.8035	NaN	NaN	NaN	NaN	NaN	18.6956	19.5031	NaN	19.5359	18.6669	NaN	NaN	19.0541	NaN	NaN	19.3206	19.4221	19.4027	1	0	0	0	0	1	0	0	0	0	0	0	0	0
20.6848	20.9736	21.0198	21.5674	21.429	22.3631	NaN	20.7743	20.8912	20.9148	20.765	21.3131	21.1564	20.5733	21.0924	21.866	21.9814	21.7689	NaN	NaN	NaN	NaN	NaN	NaN	NaN	NaN	NaN	NaN	NaN	NaN	NaN	NaN	NaN	NaN	NaN	NaN	0	0	0	1	1	1	0	0	1	0	0	1	0	0
23.3101	23.2352	21.2397	22.1863	22.053	22.3645	23.1761	22.5006	22.0897	22.4681	22.4484	22.5218	22.6201	22.0344	21.832	23.0709	21.9821	23.2024	23.3457	23.3898	23.0559	22.8453	22.8856	23.5908	25.538	25.0413	24.9421	23.0585	23.0032	22.7279	22.3092	22.9883	22.7196	23.3594	23.3842	23.489	1	1	0	0	0	0	0	0	0	0	0	0	0	0
NaN	NaN	NaN	NaN	NaN	NaN	NaN	NaN	NaN	NaN	NaN	NaN	NaN	NaN	NaN	NaN	NaN	NaN	19.8327	NaN	NaN	NaN	20.5078	NaN	NaN	NaN	NaN	20.2442	20.0147	20.2574	19.476	NaN	NaN	19.6321	NaN	NaN	0	0	0	0	0	0	0	0	0	0	0	0	0	0
27.438	27.1969	27.3138	26.3158	26.4071	26.1609	26.01	25.5294	25.3823	26.0711	26.0152	25.8677	26.1864	25.8504	25.9691	26.7451	26.4	26.857	24.9789	25.4122	24.6042	25.3738	25.2797	25.0767	26.5151	26.6256	27.1924	25.1481	25.0772	25.1491	25.6361	25.6249	25.204	26.4349	26.5279	26.7003	7	8	6	4	2	4	1	1	1	2	3	4	1	2
29.9691	29.8651	29.8633	29.5918	29.4898	29.6036	30.0325	29.7817	29.3487	29.7246	29.3206	29.6649	29.9076	29.5504	29.6851	29.9549	30.0367	29.9904	29.6939	30.05	29.5185	30.2098	29.7171	30.1223	30.2152	29.5859	30.1356	29.7545	29.9776	30.162	29.9202	30.3691	29.8746	29.7896	29.7747	29.7204	12	12	8	13	14	10	11	12	10	12	12	13	16	12
27.4061	27.5878	27.4797	27.4789	27.3712	27.6111	27.3283	27.3805	27.1101	27.6723	27.091	27.3941	27.2629	27.518	27.7208	27.7572	27.792	27.9245	27.4342	28.1545	27.7535	27.7907	27.7505	27.5665	28.8168	28.6769	28.9451	27.6479	27.2551	27.3334	27.4576	27.4714	27.4772	27.8956	28.3607	28.3967	13	8	7	5	8	9	8	5	3	7	8	5	10	6
21.3546	21.5568	20.7946	20.744	20.9688	21.2219	21.5573	21.5385	21.933	20.8802	20.5092	21.3293	20.4448	NaN	21.2738	21.5881	21.2907	22.1317	20.0199	20.1046	20.2869	20.15	20.0555	20.1157	21.0113	21.002	21.1387	19.9114	20.5477	20.253	19.9105	20.127	19.8364	20.7682	20.6496	20.3169	1	1	0	0	1	1	1	2	1	0	0	0	0	0
17.1604	NaN	NaN	NaN	17.5208	NaN	NaN	NaN	NaN	NaN	18.3731	NaN	17.2023	NaN	NaN	NaN	NaN	NaN	NaN	NaN	NaN	NaN	NaN	NaN	NaN	NaN	NaN	NaN	NaN	NaN	NaN	NaN	NaN	20.8764	20.4014	19.5755	0	0	0	0	0	0	0	0	0	0	0	0	0	0
23.8416	23.1461	23.0096	24.3253	24.382	24.3359	24.8255	26.221	25.2083	24.8726	25.2897	25.161	24.6082	24.1122	24.8129	27.6856	27.8494	28.1792	NaN	NaN	NaN	18.5497	18.0328	NaN	21.8987	18.921	21.5231	NaN	17.3297	NaN	NaN	NaN	NaN	21.9434	22.0306	22.6559	3	2	1	2	3	3	4	5	2	3	3	5	5	3
22.6826	21.504	20.9292	20.6714	20.5214	22.7939	20.5961	21.7984	22.5614	20.2265	20.7295	21.0319	20.4195	19.2038	20.4335	24.5705	25.6268	24.4622	NaN	18.6469	18.7611	17.913	16.8296	17.9439	23.0957	22.8685	20.5608	18.3101	18.4926	18.1821	NaN	18.1858	18.176	22.3988	22.7879	23.9714	1	0	0	0	0	1	1	0	1	0	0	0	0	0
24.3596	24.0528	23.6119	24.3082	24.4311	26.0207	24.4209	23.9262	23.8107	24.5702	24.1906	24.1401	23.9589	24.0398	24.2249	24.6727	24.5803	24.3286	24.0963	24.3342	24.5514	24.8643	24.4089	24.7486	25.1562	25.7883	25.3243	24.2354	24.1153	24.0671	24.2567	24.008	24.2977	24.5748	24.696	24.3489	2	1	1	1	2	1	1	1	1	2	1	1	2	2
20.1871	20.5585	20.6493	20.3212	20.4389	20.5821	20.1812	20.4801	20.2597	20.5355	20.0267	20.1235	20.0613	20.0446	20.0622	20.6496	23.1185	20.6608	20.1567	20.6189	19.9947	20.6433	20.1559	21.0137	21.4803	21.7929	21.6727	20.4397	20.2382	20.5539	18.3403	18.9457	20.1288	20.4047	20.3806	20.9797	0	1	1	1	0	1	0	0	0	1	1	0	0	0
21.4735	21.0589	21.3451	20.7157	21.1247	21.8998	20.578	20.9128	20.6208	20.2411	20.2813	20.6423	20.0486	19.9333	20.2568	21.1101	22.4701	22.4997	18.6967	19.5165	NaN	19.4005	19.1769	20.1531	21.1482	20.8697	21.3396	19.0549	19.088	NaN	NaN	NaN	19.0809	NaN	19.3387	NaN	2	1	1	0	1	1	0	0	0	0	0	0	0	0
26.7318	26.9494	26.7078	26.7403	26.7579	26.9583	26.4061	26.8362	27.1807	27.0171	27.0043	26.8933	26.844	26.9412	26.9179	27.3251	27.4937	27.643	24.4791	24.9554	24.4333	24.6978	24.6598	24.5671	25.1989	25.2858	25.5364	24.3734	24.4249	24.3822	24.5401	24.7647	24.326	25.5033	25.0427	25.3408	9	11	10	12	9	11	10	9	11	8	7	10	6	7
21.144	22.3144	21.3904	21.5196	21.9026	21.6498	22.5059	21.3914	21.3539	21.1745	21.5644	21.0107	22.4818	21.3291	21.2933	20.1761	NaN	19.9203	NaN	20.1371	20.1474	NaN	19.9183	NaN	NaN	NaN	NaN	20.5748	NaN	NaN	NaN	NaN	NaN	NaN	NaN	NaN	0	1	0	1	1	0	1	0	0	0	1	0	1	0
29.1558	28.9848	29.2312	29.1972	29.1945	29.0704	29.4306	28.988	28.7803	29.3648	29.4297	29.3433	29.2452	28.838	28.8126	27.98	28.0855	27.6956	27.745	27.329	27.304	27.0854	27.3164	28.2833	23.854	25.0172	24.9657	27.3126	26.4365	26.5082	25.5088	25.5574	26.9826	25.8491	25.3345	25.5426	18	19	14	13	14	14	20	18	17	12	22	17	18	12
20.6127	20.9708	21.1459	21.1988	21.0065	21.1172	20.9001	20.9093	21.1563	21.2863	21.1334	21.359	20.431	20.9054	20.6911	20.63	20.5833	20.5265	20.4816	20.269	21.8054	20.3327	20.5658	20.8432	20.799	20.5077	20.7521	20.4078	20.1216	20.5829	20.086	19.7693	20.3096	20.644	20.59	20.5111	0	0	0	0	0	0	0	0	0	0	0	0	0	0
20.0729	20.5821	19.6743	NaN	NaN	19.1196	19.7564	19.4663	NaN	19.399	19.6483	NaN	19.9421	20.2182	20.4654	18.9753	19.439	18.8542	NaN	NaN	NaN	NaN	NaN	NaN	NaN	NaN	NaN	NaN	NaN	NaN	NaN	NaN	NaN	NaN	NaN	NaN	0	1	0	0	0	0	0	0	0	0	0	0	0	1
24.799	24.8357	24.1765	24.79	24.8906	25.3506	25.2212	24.7563	24.4691	25.6553	25.6313	25.22	26.0093	25.2565	25.5335	24.4576	23.9862	23.9942	25.6842	25.4637	26.3185	26.1532	26.3138	26.3315	24.584	24.1596	24.2564	26.6148	26.3833	25.9156	26.5871	26.1976	27.2538	26.4039	25.8613	25.8789	6	4	1	2	3	4	4	4	2	3	4	2	6	2
NaN	NaN	NaN	NaN	NaN	NaN	NaN	NaN	NaN	NaN	NaN	NaN	NaN	NaN	NaN	NaN	19.1571	18.9401	NaN	NaN	NaN	NaN	NaN	NaN	19.3829	19.0995	19.1327	NaN	NaN	NaN	NaN	NaN	NaN	NaN	NaN	NaN	0	0	0	0	0	0	0	0	0	0	0	0	0	0
22.7275	22.4502	22.398	22.1936	22.0181	22.1075	22.3317	22.172	22.3596	22.8768	22.3734	22.3221	22.7475	22.3142	22.7681	22.1595	22.3457	22.0538	24.1007	23.9506	23.1471	23.9745	22.8607	23.7833	22.6538	22.7687	22.9592	23.1635	22.9141	24.031	23.3688	23.5526	23.5342	22.6299	22.5146	22.1132	1	1	1	0	0	0	0	0	0	1	0	0	1	0
27.7012	27.8995	27.6564	27.3533	27.1413	27.278	27.1987	27.3768	26.9394	26.6105	26.5252	26.4051	27.0953	26.4234	26.334	26.5293	26.2601	26.3848	25.2472	25.0888	25.4919	25.746	25.7376	25.1368	25.3528	25.8522	25.2136	25.9236	25.6771	25.7473	25.8078	25.679	26.1144	25.6544	25.7502	25.3828	12	13	8	12	7	10	10	7	8	5	6	5	9	5
26.6846	26.3943	26.261	26.2376	26.0747	26.4303	26.511	27.232	26.3928	26.3457	26.4538	26.5175	26.5747	26.0874	26.7387	27.8199	28.1758	28.8579	23.6139	24.0452	23.7893	23.9854	24.1859	24.2744	26.1054	25.2633	25.8337	23.2597	23.8174	23.51	24.4934	23.9436	23.8292	24.5136	24.9121	24.7539	6	7	2	3	5	7	3	6	5	6	6	4	5	8
26.4021	26.7323	26.2579	24.9395	24.9341	25.7739	24.9904	24.6195	23.8173	24.5619	23.9945	23.8987	24.9605	24.4851	23.9317	NaN	NaN	NaN	NaN	NaN	NaN	NaN	NaN	NaN	NaN	NaN	NaN	NaN	NaN	NaN	NaN	NaN	NaN	NaN	NaN	NaN	1	2	1	0	0	1	0	0	0	0	0	0	0	0
19.93	20.1468	19.1501	20.3051	19.9317	19.7678	20.4699	19.7257	20.7068	20.3247	19.6374	19.4338	19.8008	20.4171	19.9806	20.0479	20.1427	20.0877	22.3975	22.6776	22.9041	22.6117	23.3512	20.934	22.3918	22.7625	23.0867	23.1536	22.6976	23.0405	22.0145	21.6593	23.335	21.9204	22.761	22.4613	0	0	0	0	0	0	0	0	0	0	0	0	0	0
19.7787	19.4968	20.1804	18.7755	18.7081	18.9369	21.1341	20.0305	19.5808	19.5796	20.8841	19.9575	19.6205	19.5152	NaN	21.4711	19.5236	20.6616	18.1103	18.5287	17.6813	18.0942	17.9667	18.8045	19.7601	21.0937	19.864	18.0607	17.9976	17.7831	17.823	17.7057	18.2862	18.8248	19.0299	18.939	1	1	0	0	0	0	1	0	1	0	1	0	0	0
24.3578	24.0327	23.0591	23.2111	23.0316	23.2314	24.159	25.0957	24.1787	24.1759	23.8861	23.368	22.9566	23.235	23.3636	24.3546	24.6626	24.2811	22.3387	22.5608	22.5435	22.4937	22.4325	23.2286	24.4516	24.3943	24.4569	21.9617	22.0703	21.7748	21.9486	21.8697	21.8584	22.8401	23.0242	23.2014	3	2	1	1	2	2	2	7	3	1	2	1	1	1
20.9081	21.4761	20.9667	NaN	NaN	NaN	NaN	19.5555	NaN	NaN	19.8214	21.0729	NaN	NaN	NaN	20.4297	20.8468	20.3843	19.6627	19.2268	NaN	19.9349	19.8488	NaN	19.7278	19.9584	20.5386	NaN	19.8792	19.2413	19.8231	19.7059	19.1185	19.601	20.2514	19.7283	0	0	0	0	0	0	0	0	0	0	2	0	0	0
20.9104	21.6266	20.5076	20.359	20.2527	20.7926	NaN	19.926	19.6864	20.7103	20.4424	20.7086	21.3503	21.0869	20.0434	20.8847	20.8897	20.782	19.3596	19.9077	19.903	19.681	19.7922	20.9043	20.5073	NaN	20.8534	18.6707	19.2601	19.4079	19.5837	19.6005	19.059	19.7335	20.2257	20.1519	1	1	1	1	1	1	0	0	0	1	1	1	1	1
19.3263	19.4364	NaN	20.265	19.5491	19.8984	19.2147	19.023	19.1548	19.2094	18.8109	20.2195	18.6906	19.9379	19.0897	NaN	18.725	19.2686	22.6071	22.688	21.1632	22.1388	22.5494	22.419	23.4595	23.2808	23.2294	21.8224	22.0848	21.5637	22.4227	21.1833	21.5459	22.2425	23.3159	23.2862	0	0	0	0	0	0	0	0	0	0	0	0	0	0
21.9933	22.443	21.9074	21.5814	21.7643	21.2687	21.8756	21.1922	21.6617	20.7503	20.7423	21.0131	21.3762	21.6219	21.2164	21.7023	20.9945	20.5942	21.9969	21.848	21.8472	22.0655	21.8381	23.18	21.3065	22.1343	21.1834	22.3884	22.3424	21.6513	21.8494	21.5474	22.8648	21.4531	21.466	21.4898	1	1	0	1	0	1	2	0	0	0	0	0	0	0
19.9424	21.0679	20.5693	21.7222	21.7475	21.4329	22.368	22.4075	23.0299	20.4324	20.7411	21.5885	21.1683	21.1977	21.5042	23.4165	22.2169	22.2343	20.811	21.19	22.9014	22.9126	23.3027	21.5562	20.5946	NaN	NaN	23.678	23.7478	24.0983	23.8254	23.6388	24.7591	23.5228	23.2145	22.5785	0	0	0	1	1	0	0	2	1	0	0	1	0	0
NaN	NaN	19.5862	20.2056	19.4732	19.7777	20.0902	19.1579	19.9818	19.1543	19.2566	20.4879	NaN	NaN	19.8738	19.4217	20.4684	19.2173	NaN	NaN	NaN	NaN	NaN	NaN	NaN	NaN	NaN	NaN	NaN	NaN	NaN	NaN	NaN	NaN	NaN	NaN	0	0	0	1	0	1	1	0	0	0	0	2	0	0
24.6449	24.9836	25.3862	25.6983	25.4593	25.4447	24.058	23.587	24.711	24.718	24.3996	24.3687	24.5191	25.0856	25.0549	24.5676	24.5349	24.3909	24.2662	24.5645	24.7334	24.8776	25.6748	24.5171	25.7663	24.9259	24.7586	24.1094	25.1056	25.4259	25.282	24.8683	25.0631	24.5795	25.2232	24.2736	5	4	8	10	7	6	4	3	3	5	4	5	4	4
22.6914	23.4677	23.9873	23.9737	23.6736	23.9354	22.8711	22.3095	22.9571	23.2266	22.8322	23.3301	22.9682	23.1907	22.8547	21.1395	22.1694	21.3945	21.2437	21.0465	21.3506	21.8732	22.5976	21.8157	21.8637	22.4603	21.344	21.6531	22.2979	21.4789	21.1152	21.4101	21.8892	21.2486	22.2319	21.1762	2	3	3	2	5	2	2	1	3	2	2	2	3	3
20.2496	21.4478	21.6189	21.7888	21.8219	21.8649	20.6962	20.731	22.5669	24.1174	21.4385	23.0682	20.9948	22.1079	21.2303	NaN	NaN	NaN	21.0391	23.9925	23.0335	23.8785	23.1401	22.9071	NaN	21.201	NaN	22.3887	25.6623	25.8622	25.5118	22.133	24.7992	23.04	23.082	22.7441	0	0	0	0	0	0	0	0	0	1	0	0	0	0
22.9626	22.8945	23.6302	24.2644	24.3303	24.1491	23.3559	22.78	23.6454	23.6365	23.2818	24.0771	22.7678	23.3423	23.5087	22.7606	23.0425	23.005	21.1459	21.1379	21.441	22.5288	22.3638	21.8587	23.088	22.672	21.5079	22.1423	22.5381	23.1937	22.6911	22.5945	22.666	22.556	22.771	22.3867	2	2	2	3	2	2	2	2	2	2	2	2	2	2
26.3328	26.9959	26.1437	25.6767	26.4884	26.2729	24.9873	24.0104	25.0928	23.9289	25.5181	24.5201	25.8363	25.5851	26.2629	26.4406	27.0733	26.872	20.8682	19.3313	19.5194	19.719	19.2941	20.0526	25.143	25.6349	24.5626	19.5825	18.5032	18.8148	20.2446	19.4677	19.8462	22.0024	20.1567	20.5492	7	9	6	3	8	7	2	2	4	1	5	4	3	3
NaN	21.5717	21.4809	25.7846	23.2315	22.6583	21.1146	21.8429	26.9455	22.4151	22.5567	21.9341	21.277	23.2998	22.5847	NaN	NaN	NaN	NaN	NaN	NaN	NaN	NaN	NaN	NaN	NaN	NaN	NaN	NaN	NaN	NaN	NaN	NaN	NaN	NaN	NaN	0	0	0	1	0	0	0	0	1	0	0	0	0	0
18.8005	19.9138	19.4379	NaN	18.8159	NaN	NaN	19.5472	19.6619	20.6975	20.3634	21.1123	25.2722	20.5458	20.7301	NaN	19.4596	NaN	NaN	NaN	NaN	NaN	NaN	NaN	18.6849	18.8052	18.6267	NaN	NaN	NaN	NaN	NaN	NaN	NaN	NaN	NaN	0	0	0	0	0	0	0	0	0	0	0	0	3	0
NaN	18.1548	18.9367	NaN	18.5224	NaN	19.0366	18.7029	18.9903	20.2249	21.5795	21.0635	24.1009	20.0498	20.3437	18.3149	18.8154	19.1922	NaN	NaN	NaN	NaN	NaN	NaN	NaN	NaN	NaN	NaN	NaN	NaN	NaN	NaN	NaN	NaN	NaN	NaN	0	0	0	0	0	0	0	0	0	0	1	0	1	0
20.7444	20.6366	20.0973	20.0544	19.612	18.4143	20.0699	19.6965	20.1134	25.0909	22.6906	24.8647	24.9708	23.0595	23.0991	20.3831	20.9093	20.9678	NaN	NaN	NaN	NaN	NaN	NaN	NaN	19.3276	NaN	NaN	NaN	NaN	21.3046	NaN	NaN	NaN	NaN	NaN	0	0	0	0	0	0	0	0	0	1	0	2	1	0
[truncated: 736 more rows]
[truncated: 54 more columns]
