# Supplementary figures and images for: A genome-wide resource for the analysis of protein localisation in Drosophila
Source: eLife journal article supplement (doi:10.7554/elife.12068), 2016-02-20

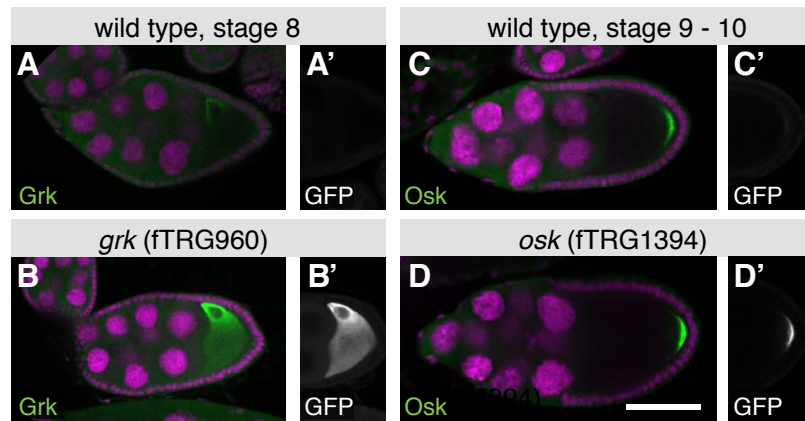

**Sarov et al. Figure 3 Supplement 1**

Supplement: supp [file elife-12068-supp-v1.zip]

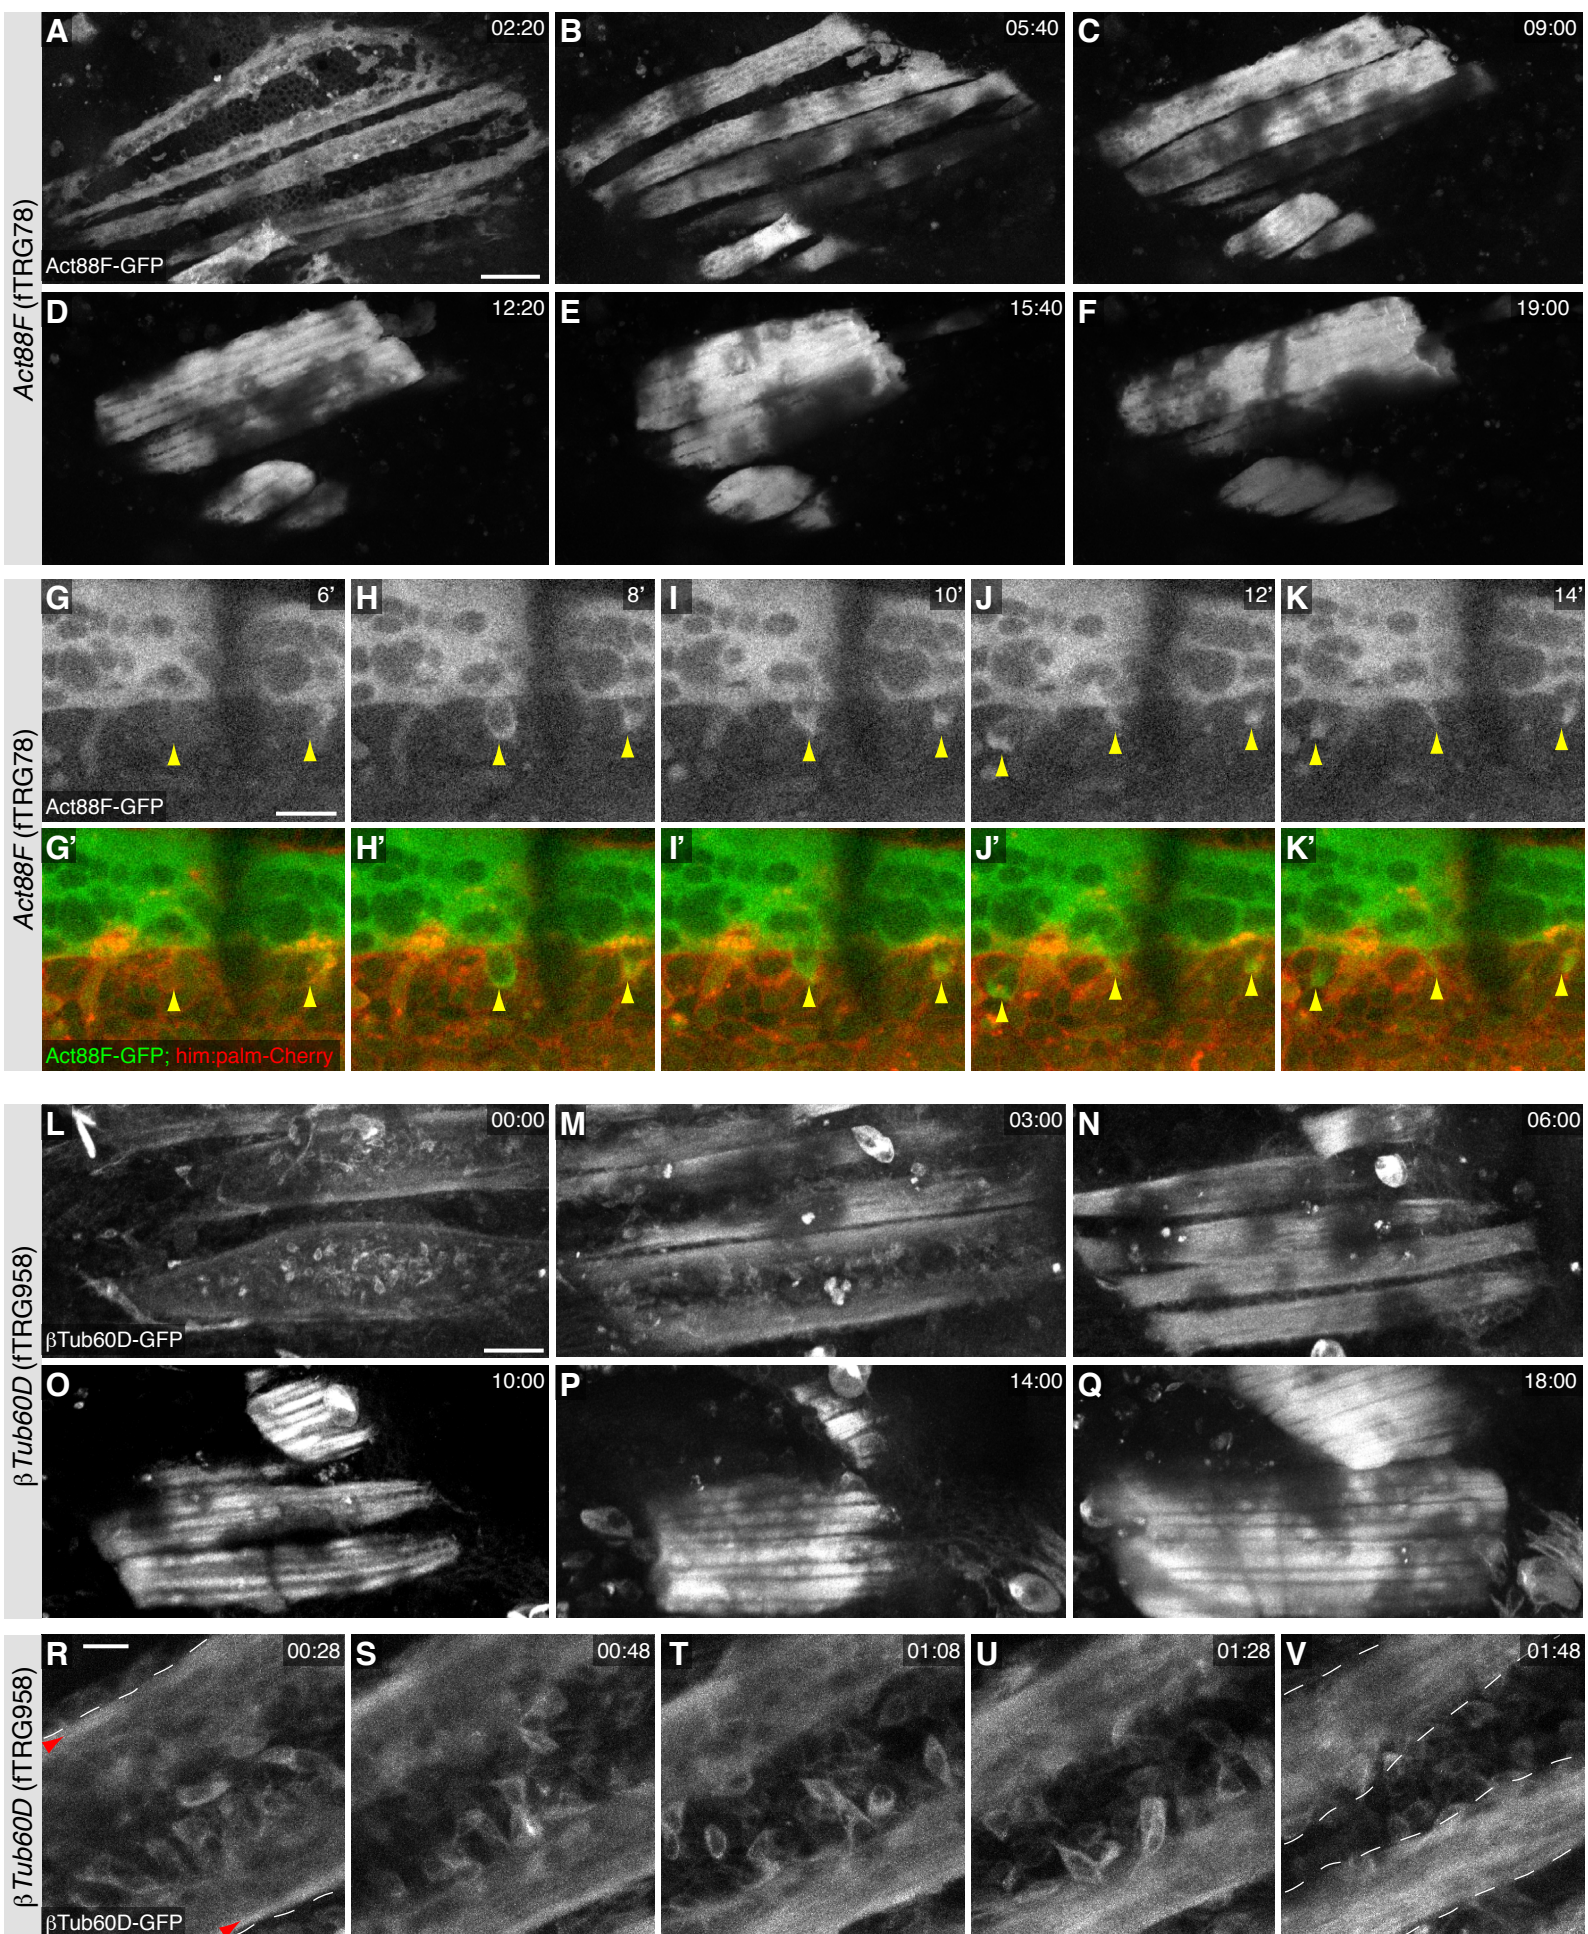

Sarov et al. Figure 8 Supplement 1

Supplement: supp [file elife-12068-supp-v1.zip]

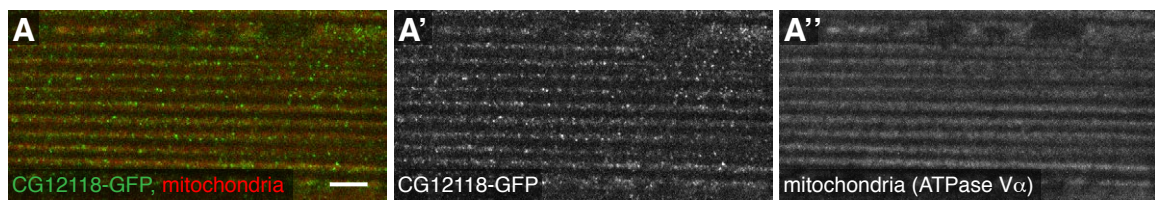

Sarov et al. Figure 6 Supplement 1

Supplement: supp [file elife-12068-supp-v1.zip]

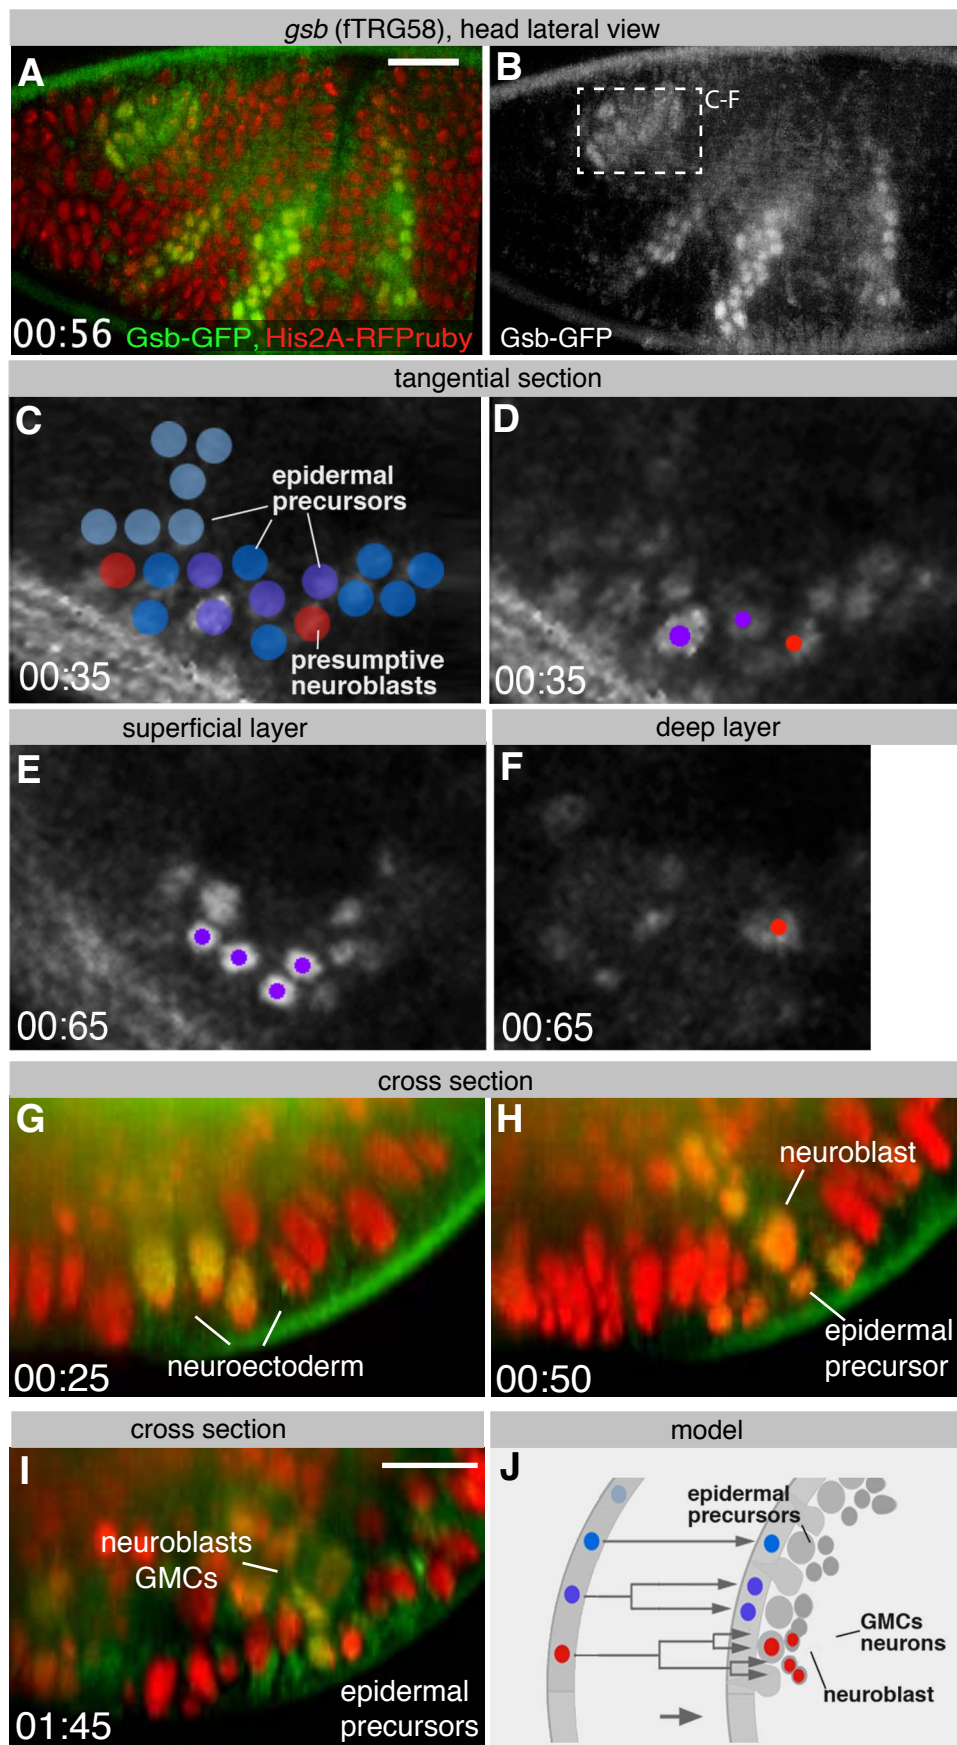

Sarov et al. Figure 4 Supplement 1

Supplement: supp [file elife-12068-supp-v1.zip]

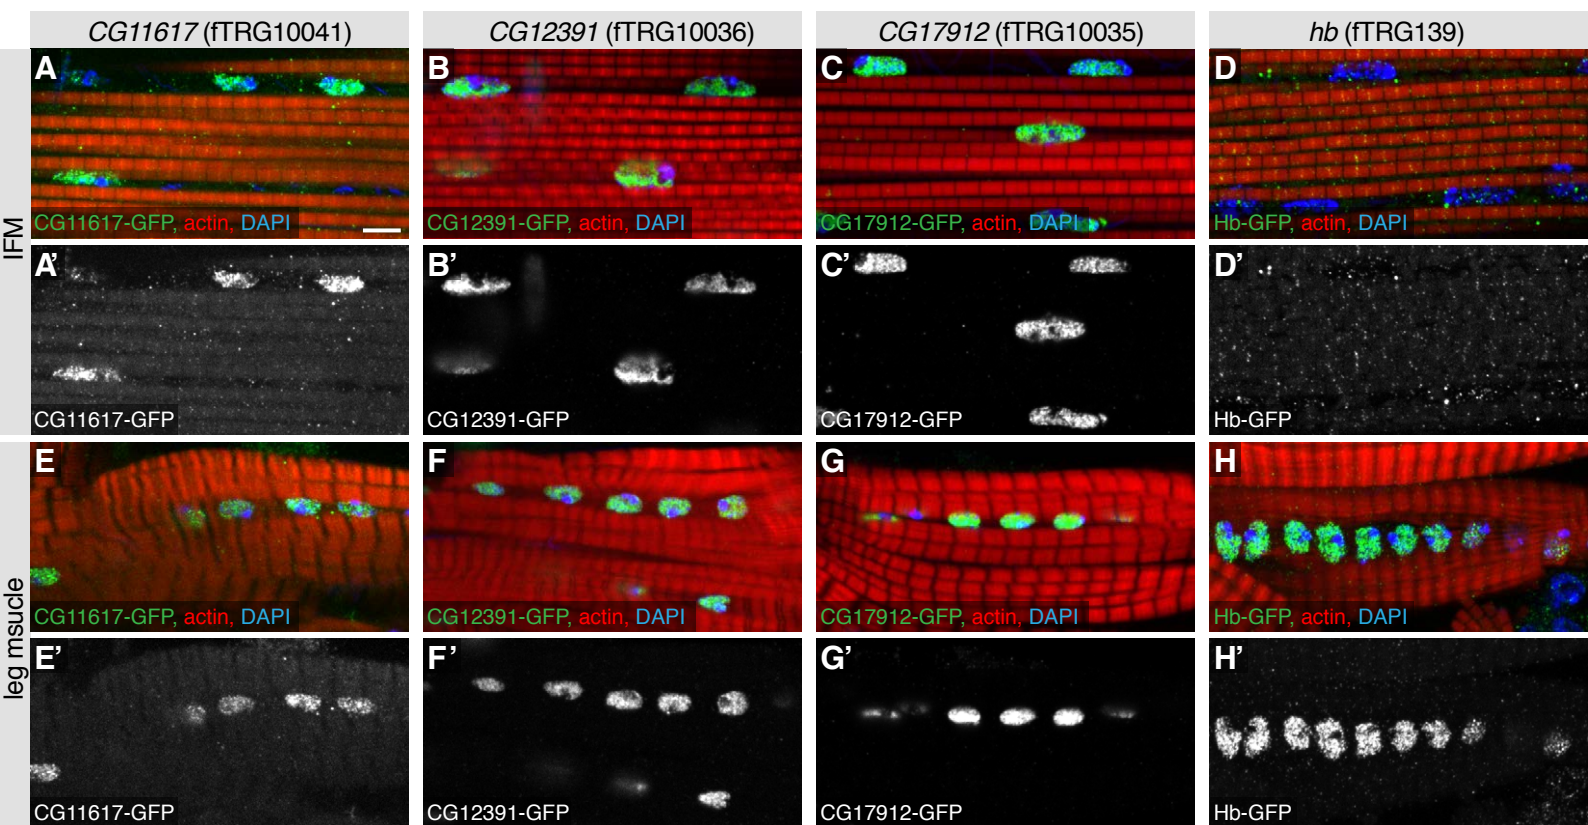

Sarov et al. Figure 6 Supplement 2

Supplement: supp [file elife-12068-supp-v1.zip]

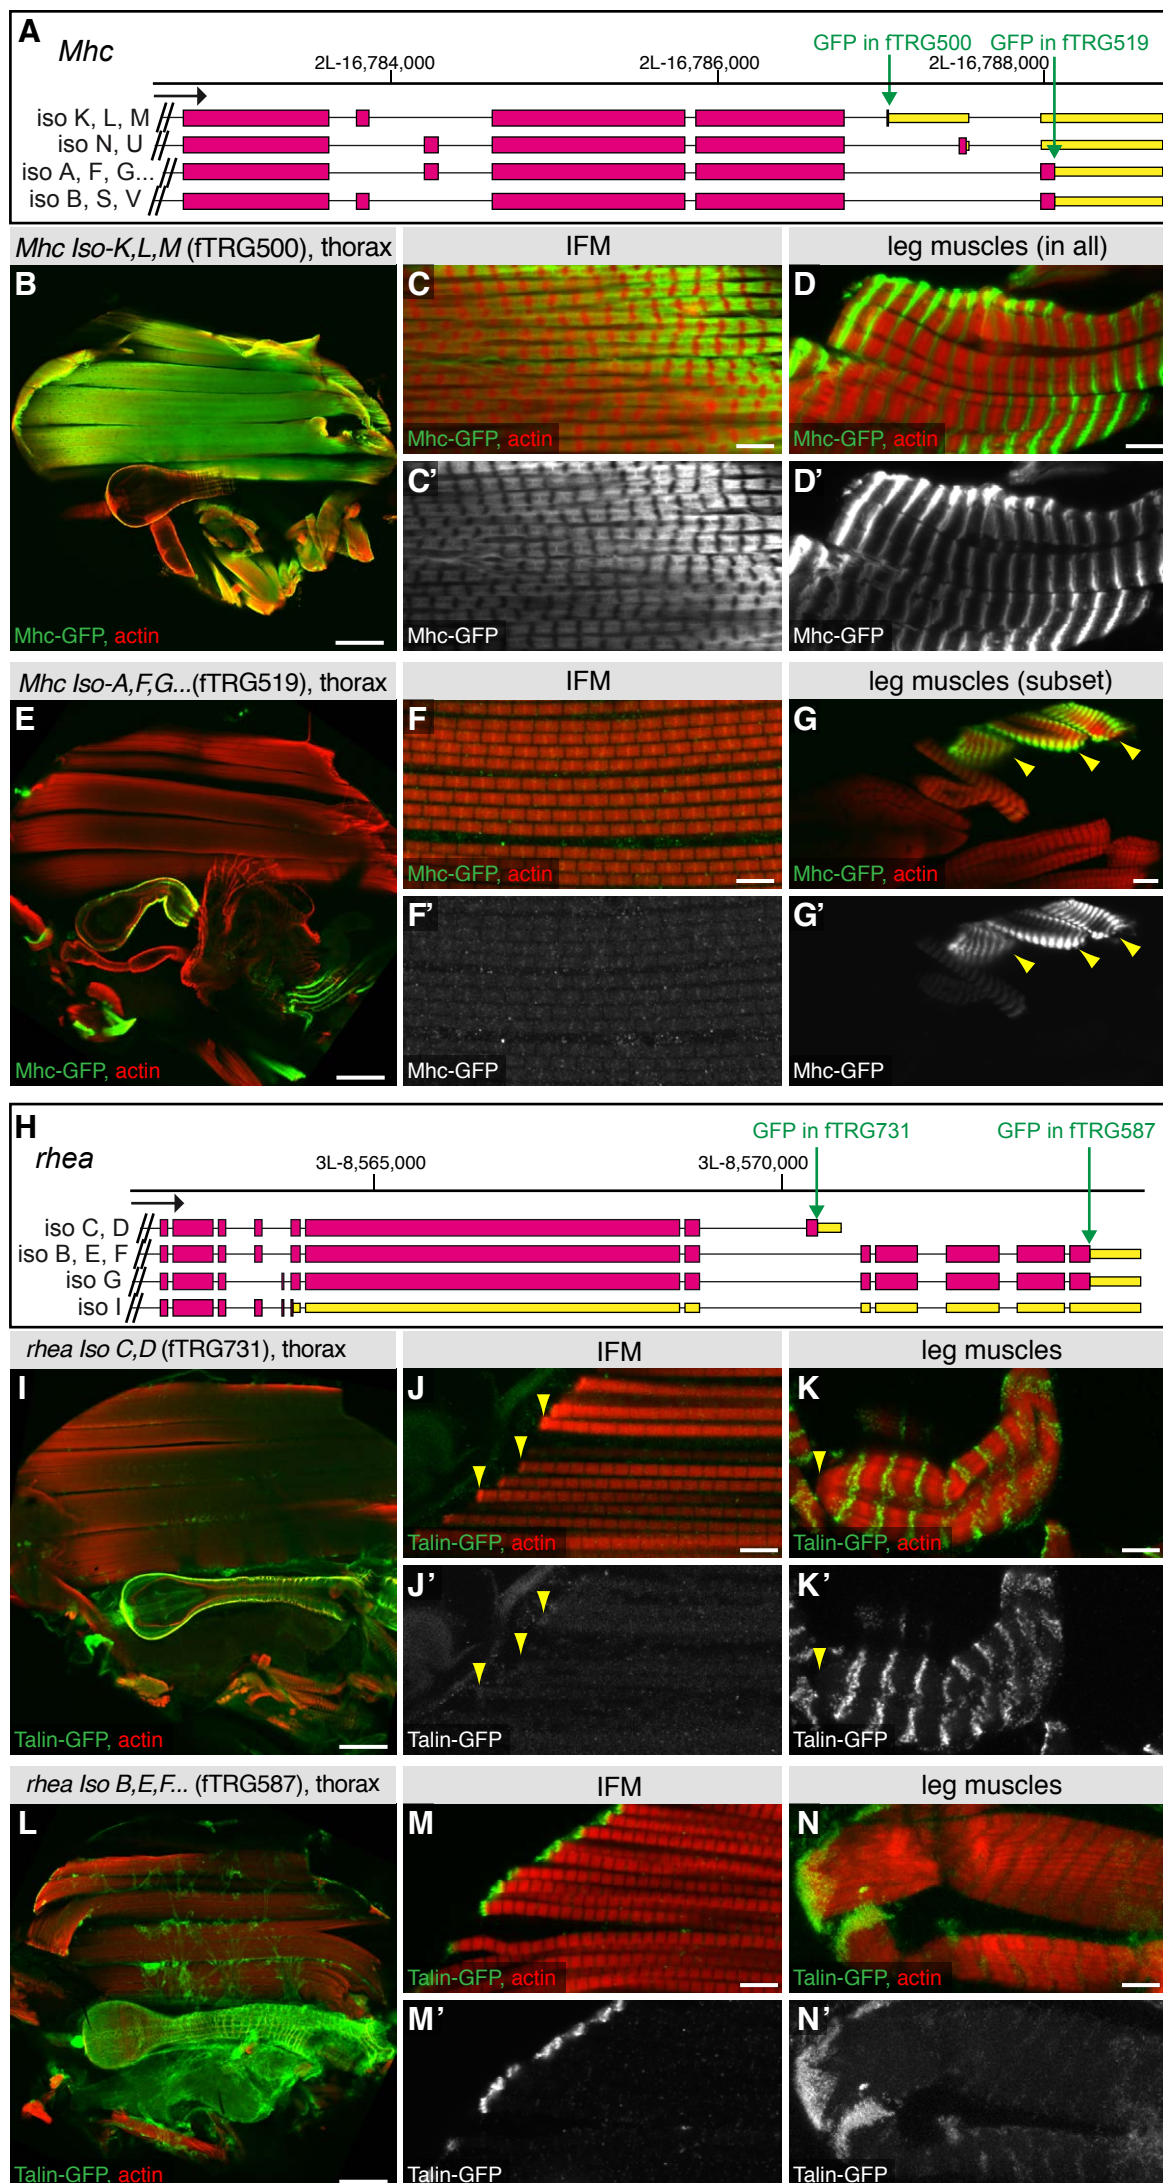

Sarov et al. Figure 6 - Supplement 3

Supplement: supp [file elife-12068-supp-v1.zip]

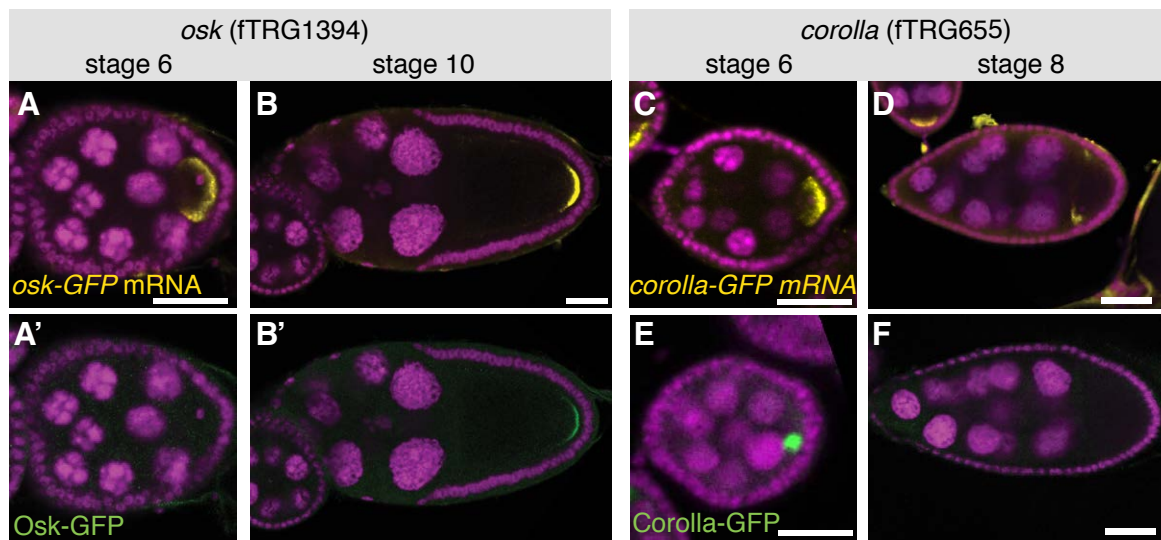

Sarov et al. Figure 3 Supplement 2

Supplement: supp [file elife-12068-supp-v1.zip]

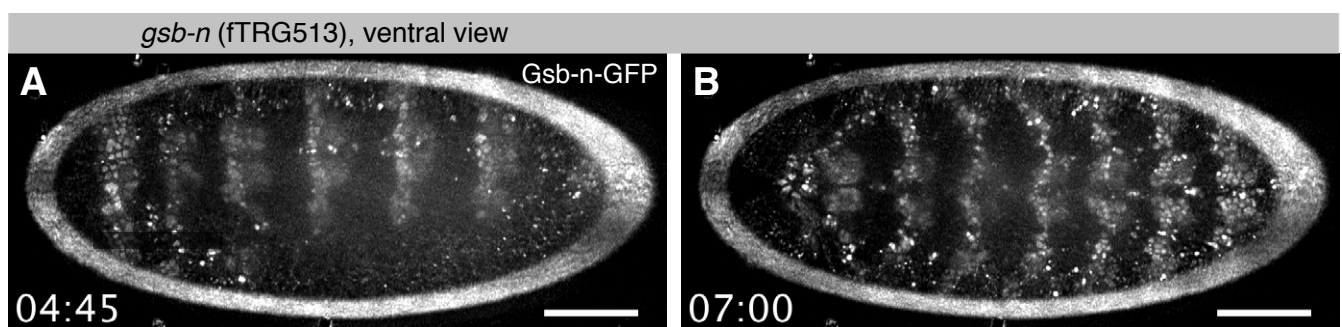

Sarov et al. Figure 4 Supplement 2

Supplement: supp [file elife-12068-supp-v1.zip]

Tagging cassettes

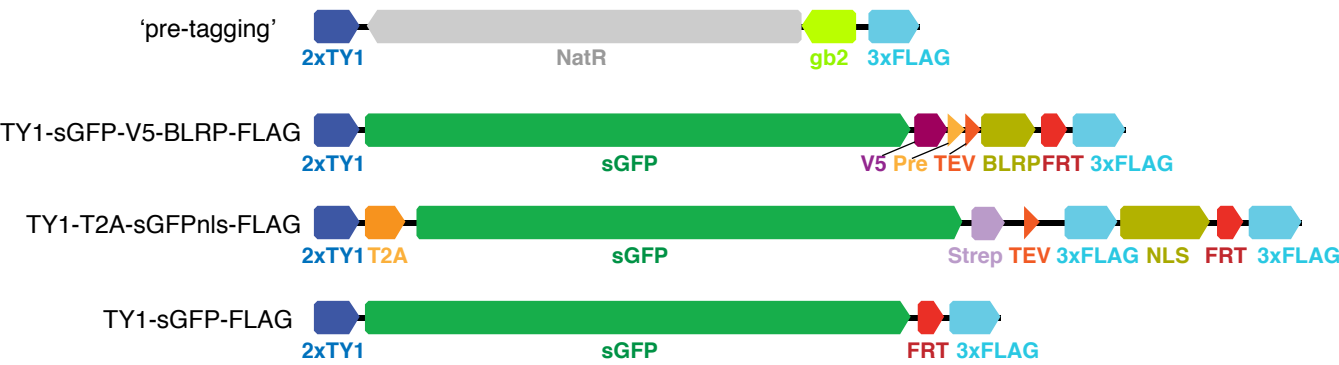

Sarov et al. Figure 1 Supplement 1

Supplement: supp [file elife-12068-supp-v1.zip]

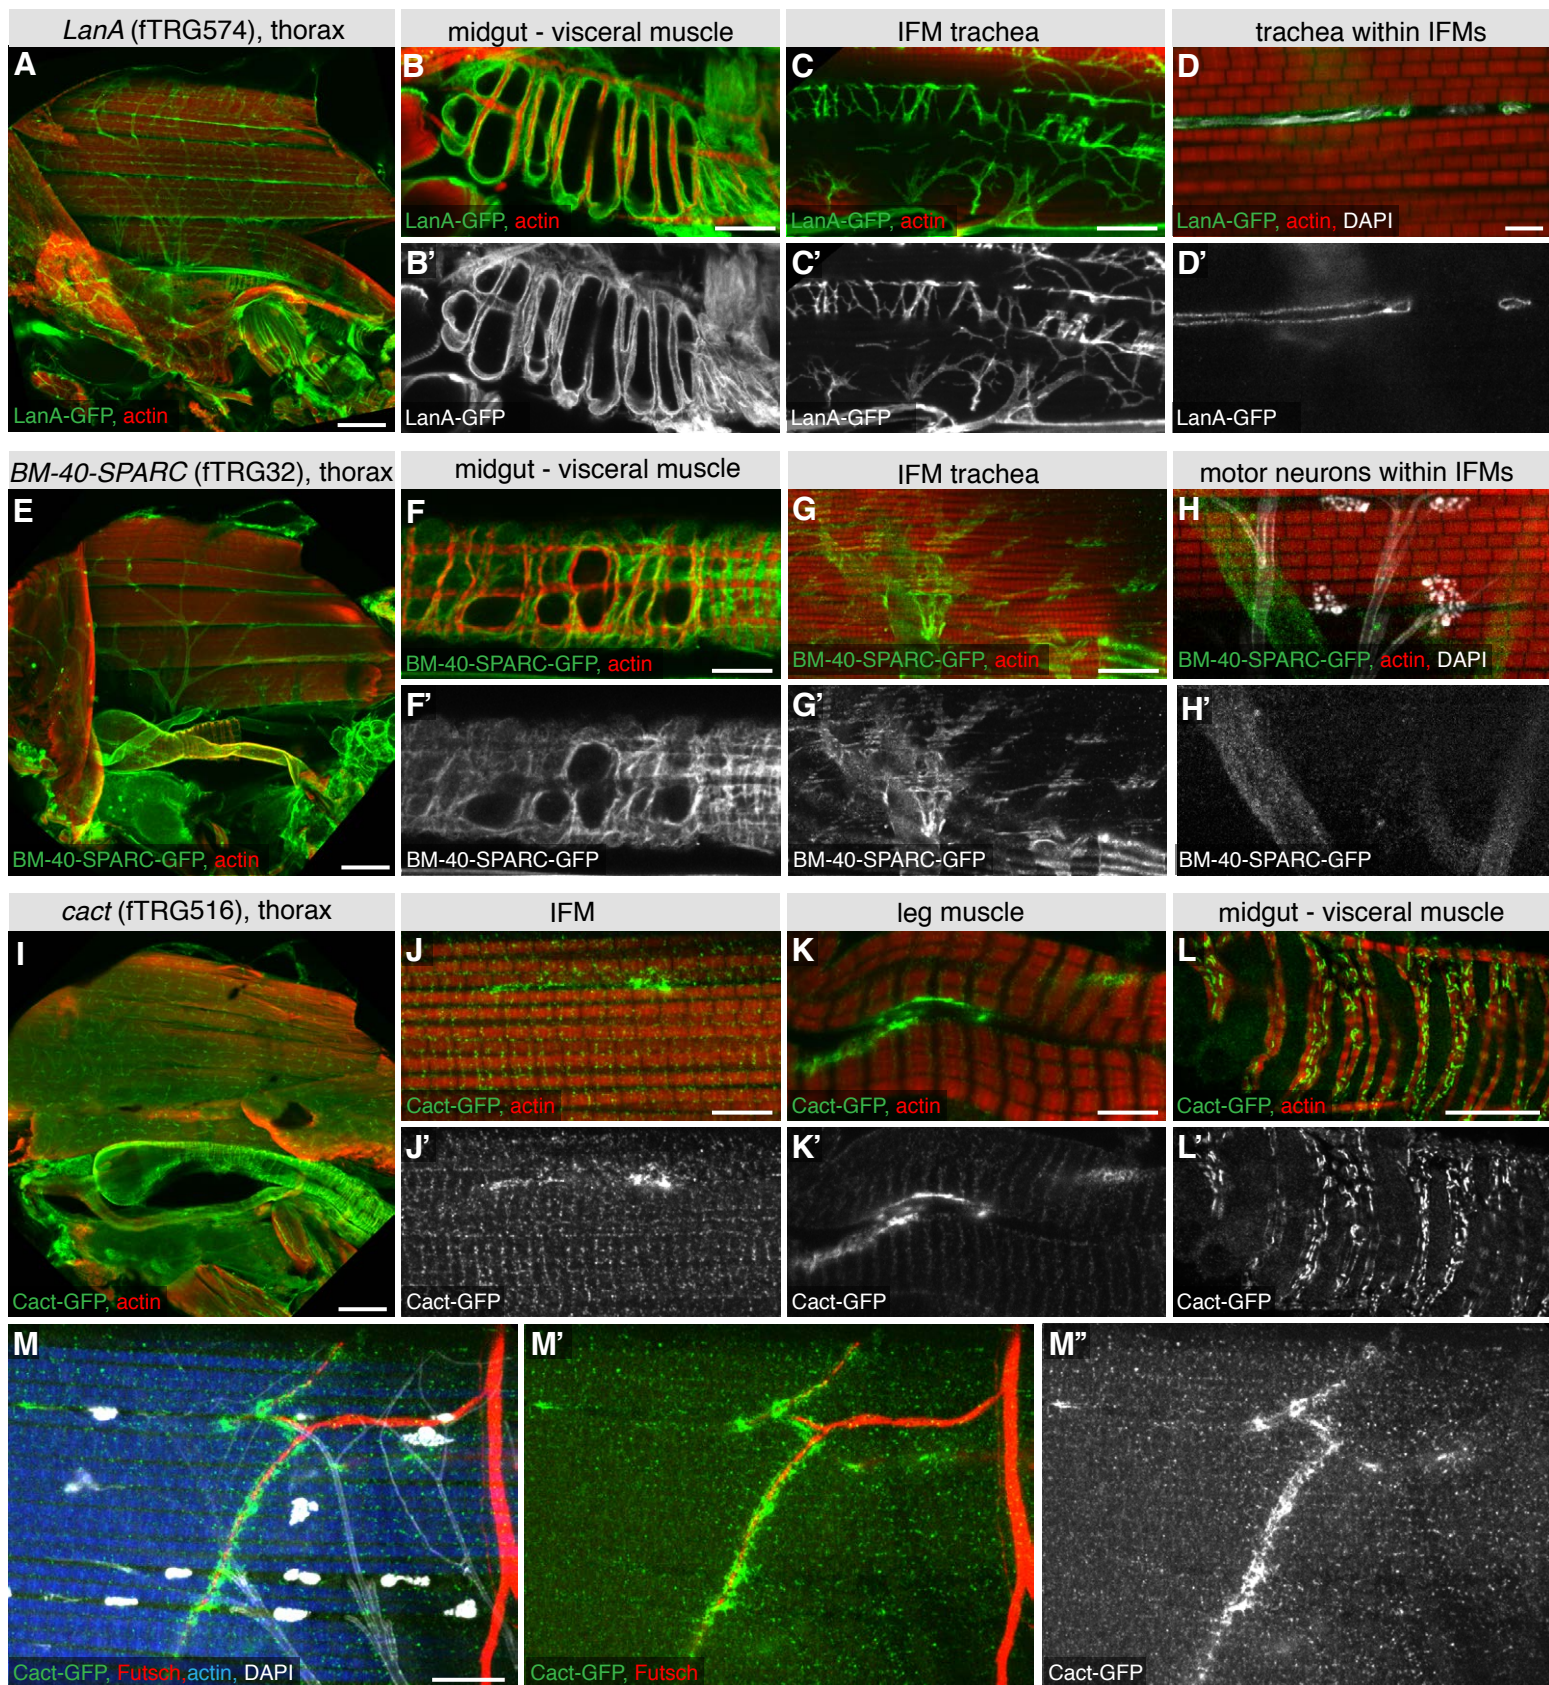

Sarov et al. Figure 5 Supplement 1

Supplement: supp [file elife-12068-supp-v1.zip]
